# Supplementary material for: An Increase in Kinematic Freedom in the Lokomat Is Related to the Ability to Elicit a Physiological Muscle Activity Pattern: A Secondary Data Analysis Investigating Differences Between Guidance Force, Path Control, and FreeD
Source: Front Robot AI. 2019 Oct 31;6:109. doi: 10.3389/frobt.2019.00109 (PMC7805962; doi:10.3389/frobt.2019.00109)
Supplement: Supplementary Data Sheet 4 — Source data sEMG FreeD knee. [file Data_Sheet_4.xlsx]

## Sheet: M.rectus femoris
Subject 1																					Subject 2																					Subject 3
Stance1	Swing1	Stance2	Swing2	Stance3	Swing3	Stance4	Swing4	Stance5	Swing5	Stance6	Swing6	Stance7	Swing7	Stance8	Swing8	Stance9	Swing9	Stance10	Swing10		Stance1	Swing1	Stance2	Swing2	Stance3	Swing3	Stance4	Swing4	Stance5	Swing5	Stance6	Swing6	Stance7	Swing7	Stance8	Swing8	Stance9	Swing9	Stance10	Swing10		Stance1	Swing1	Stance2	Swing2	Stance3	Swing3	Stance4	Swing4
6.35436	4.00135	4.68496	2.36632	5.87588	5.88032	5.36359	2.1634	7.96443	2.8509	9.38766	6.37986	7.96222	3.10261	5.14181	6.65764	6.90935	5.57316	5.59035	4.67276		18.362	3.97667	17.4602	4.55493	13.7199	4.93814	9.59632	5.70915	21.843	4.10746	6.7624	5.67702	16.6272	5.68391	20.2275	4.65589	15.7438	6.39296	16.3495	8.14609		1.93137	1.61578	1.42651	1.512	1.54199	1.72615	1.79845	1.58409
6.32387	4.01299	4.67775	2.36355	5.79383	5.8903	5.36303	2.16395	7.99437	2.82706	9.39709	6.39151	7.96	3.10205	5.10633	6.66096	6.916	5.57815	5.62362	4.67332		18.3689	3.98355	17.4556	4.54116	13.5523	4.94273	9.75236	5.71144	21.8499	4.08452	6.66832	5.67473	16.6295	5.85142	20.2275	4.64671	15.7483	6.39984	16.345	8.04742		1.92711	1.58643	1.42822	1.50754	1.53731	1.72955	1.79314	1.58622
6.29282	4.02574	4.58572	2.36355	5.69736	5.87478	5.36858	2.1634	8.04316	2.82262	9.39875	6.41646	7.95944	3.10095	5.06198	6.67593	6.89271	5.5776	5.61863	4.67443		18.3803	3.98585	17.4487	4.53886	13.3711	4.9542	10.0966	5.71603	21.8614	4.08452	6.59948	5.67473	16.6295	5.96615	20.2298	4.63753	15.7506	6.39066	16.3473	7.97169		1.94731	1.58388	1.42651	1.50669	1.51647	1.72828	1.77357	1.59239
6.27009	4.04182	4.55522	2.36521	5.65134	5.76999	5.34695	2.17005	8.11524	2.82595	9.39875	6.41757	7.96	3.09485	5.02982	6.69811	6.88163	5.57649	5.56374	4.66168		18.3918	3.98585	17.4418	4.52739	13.2242	4.95649	10.4912	5.72062	21.8636	4.08452	6.5467	5.67473	16.6318	6.0304	20.2321	4.63065	15.7529	6.37919	16.3495	7.89368		1.94519	1.58431	1.43396	1.50477	1.5288	1.72487	1.76039	1.59643
6.25789	4.04792	4.55079	2.37187	5.65134	5.68294	5.36969	2.17005	8.15738	2.80654	9.39155	6.42366	7.95889	3.08487	4.98491	6.71086	6.89438	5.56928	5.49333	4.63894		18.4125	3.98585	17.4395	4.50444	13.0934	4.95879	10.9181	5.7298	21.8568	4.08452	6.5031	5.67473	16.6318	6.08777	20.2459	4.62836	15.7598	6.3746	16.3404	7.80189		1.94519	1.58154	1.42247	1.49882	1.53008	1.72445	1.74976	1.59579
6.25844	4.0518	4.53859	2.37852	5.597	5.68849	5.3586	2.17726	8.17512	2.74112	9.386	6.42755	7.93838	3.08099	4.93279	6.72749	6.89438	5.5654	5.47614	4.6273		18.4262	3.98814	17.4441	4.48379	12.9397	4.97256	11.2347	5.74816	21.8476	4.07075	6.44574	5.67473	16.6318	6.14055	20.262	4.59623	15.7667	6.36772	16.3243	7.7537		1.94285	1.57814	1.4061	1.50392	1.55071	1.71148	1.73955	1.60004
6.25013	4.05679	4.54303	2.38185	5.45951	5.69569	5.35472	2.17615	8.18454	2.61027	9.36992	6.422	7.93893	3.08431	4.91228	6.73969	6.91046	5.5654	5.47503	4.6334		18.4285	3.98814	17.4487	4.46084	12.7308	4.97715	11.2485	5.76192	21.8407	4.05239	6.34936	5.66325	16.6318	6.16579	20.2803	4.58246	15.7736	6.35624	16.3014	7.73993		1.94519	1.57452	1.41567	1.50286	1.56176	1.70382	1.72849	1.61408
6.27729	4.0701	4.54414	2.38462	5.30981	5.68627	5.35139	2.17061	8.18953	2.37796	9.40153	6.40814	7.91287	3.08043	4.90895	6.74025	6.91711	5.56374	5.43733	4.63395		18.4285	3.99273	17.4487	4.43331	12.4922	4.97715	11.1842	5.76192	21.8315	4.0501	6.23463	5.65866	16.6341	6.17955	20.2987	4.61459	15.7874	6.33559	16.2623	7.74223		1.94668	1.56049	1.4229	1.48095	1.54709	1.69999	1.68341	1.61535
6.29892	4.07453	4.50533	2.42121	5.21611	5.67573	5.37301	2.16451	8.18676	2.15841	9.43036	6.38319	7.91509	3.07322	4.9145	6.70975	6.91212	5.56152	5.34806	4.63673		18.4285	3.99962	17.4533	4.41036	12.2604	4.98632	11.221	5.76192	21.82	4.03862	6.11301	5.65178	16.6318	6.2025	20.3079	4.70179	15.7919	6.32641	16.2004	7.73993		1.95603	1.55687	1.40993	1.48287	1.55368	1.67915	1.61238	1.61706
6.24791	4.07453	4.43436	2.43008	5.17841	5.77664	5.44065	2.16617	8.20561	2.08578	9.39875	6.32775	7.90677	3.07322	4.91671	6.68425	6.91212	5.56097	5.31535	4.63562		18.4285	4.01338	17.4671	4.39659	12.0585	4.98862	11.3426	5.76192	21.8246	4.0065	5.99369	5.63113	16.6249	6.24839	20.3124	4.77063	15.7896	6.331	16.1201	7.7101		1.9554	1.55751	1.40674	1.49159	1.55326	1.64406	1.61238	1.63513
6.15587	4.07398	4.3961	2.43673	5.16787	5.9657	5.45951	2.17116	8.32315	2.05029	9.36992	6.25789	7.89014	3.06768	4.91394	6.68037	6.91212	5.56762	5.31535	4.63451		18.4262	4.0478	17.4762	4.3943	11.8726	4.98862	11.5376	5.75733	21.8384	3.98814	5.90649	5.63342	16.6226	6.29658	20.317	4.7821	15.7896	6.31035	16.0329	7.70551		1.9807	1.55475	1.40993	1.48606	1.56772	1.63322	1.62195	1.64895
6.13924	4.07342	4.3961	2.44172	5.15734	5.99786	5.46061	2.16894	8.46232	2.00539	9.36382	6.20355	7.86519	3.0455	4.94943	6.74468	6.91101	5.56651	5.31203	4.63063		18.4148	4.06157	17.4808	4.38971	11.6914	4.9955	11.8382	5.74586	21.8545	3.99273	5.83076	5.6449	16.6226	6.34707	20.3193	4.7821	15.7965	6.28511	15.9319	7.70322		1.99367	1.5573	1.41418	1.47628	1.5707	1.6245	1.62705	1.65087
6.16807	4.07564	4.39167	2.44394	5.15069	5.97457	5.44176	2.1634	8.49724	1.98598	9.35883	6.12039	7.85078	3.00503	4.99101	6.88939	6.91157	5.56596	5.32478	4.62564		18.4033	4.06616	17.4992	4.392	11.533	5.03451	12.288	5.72291	21.882	4.0065	5.74357	5.64719	16.6249	6.40673	20.3147	4.78669	15.8103	6.28511	15.8103	7.7101		1.98793	1.55709	1.42098	1.47734	1.57516	1.59941	1.63832	1.65087
6.17251	4.07564	4.38945	2.44616	5.15013	5.91303	5.32589	2.15896	8.49835	1.98321	9.35939	6.01061	7.85078	2.9701	4.99489	6.89327	6.9038	5.56762	5.32755	4.61344		18.3918	4.07993	17.5382	4.40577	11.3655	5.07582	12.8295	5.71144	21.921	4.02945	5.66555	5.65178	16.6249	6.46409	20.301	4.79357	15.8309	6.28281	15.6841	7.72387		1.96837	1.54837	1.43332	1.47181	1.57963	1.57282	1.66405	1.65087
6.17084	4.07453	4.38169	2.44561	5.15069	5.88198	5.17453	2.14677	8.50334	1.97877	9.37159	5.97014	7.84412	2.92907	4.99544	6.69811	6.85834	5.56984	5.29927	4.6018		18.3734	4.0937	17.5795	4.40118	11.1452	5.11712	13.254	5.70456	21.9623	4.0501	5.63113	5.67702	16.6272	6.49393	20.2826	4.79357	15.8539	6.27134	15.5877	7.73534		1.9471	1.51009	1.43013	1.46777	1.59196	1.57048	1.6783	1.66129
6.11873	4.07398	4.3767	2.44339	5.15179	5.88531	5.13793	2.13124	8.52885	1.96214	9.37269	5.97014	7.83747	2.8764	4.996	6.51625	6.84282	5.57261	5.28486	4.59293		18.3505	4.09599	17.6185	4.37594	10.9272	5.13777	13.472	5.71374	21.999	4.05469	5.60589	5.70915	16.6341	6.50081	20.2711	4.77751	15.8814	6.26905	15.4959	7.74911		1.9403	1.48244	1.41694	1.46564	1.61387	1.58175	1.68426	1.67469
5.91414	4.07231	4.36672	2.44394	5.15401	5.88476	5.15069	2.13457	8.56211	1.92222	9.37269	5.94186	7.8541	2.83814	4.99434	6.45471	6.84282	5.58924	5.28541	4.58516		18.3	4.08452	17.6575	4.32546	10.7276	5.14007	13.5569	5.76192	22.0312	4.0478	5.57835	5.74586	16.6433	6.52376	20.2597	4.76145	15.9136	6.26905	15.3881	7.75141		1.942	1.4801	1.41886	1.46479	1.62471	1.58261	1.68681	1.67065
5.76444	4.06621	4.34676	2.44949	5.15013	5.88586	5.13239	2.14566	8.57986	1.8629	9.36937	5.81323	7.89402	2.82317	4.99822	6.43586	6.84004	5.58813	5.28375	4.57962		18.2243	4.09599	17.6896	4.28186	10.5073	5.13777	13.5684	5.82388	22.0518	4.03404	5.55081	5.81011	16.6479	6.55129	20.2459	4.74538	15.9503	6.25757	15.3192	7.73075		1.93647	1.48946	1.41928	1.44034	1.62131	1.58048	1.68681	1.64917
5.72563	4.05402	4.32292	2.45337	5.14791	5.88032	5.15179	2.13734	8.58706	1.83684	9.3666	5.54156	7.90733	2.81763	4.99711	6.46968	6.84226	5.59423	5.27322	4.57574		18.1646	4.12812	17.7126	4.26121	10.2572	5.13548	13.5753	5.88584	22.061	4.02256	5.51869	5.87436	16.6479	6.55818	20.2367	4.73162	15.9916	6.24381	15.3284	7.7101		1.92137	1.48946	1.42311	1.44204	1.62195	1.59132	1.69723	1.63045
5.68959	4.02851	4.31848	2.45337	5.14736	5.86091	5.17508	2.14011	8.57376	1.83573	9.3921	5.23052	7.90456	2.82428	4.99156	6.48022	6.84614	5.59811	5.271	4.50754		18.1233	4.19237	17.7309	4.25432	10.0231	5.13318	13.6258	5.92714	22.061	4.01797	5.48656	5.90649	16.6479	6.55818	20.2321	4.72014	16.0283	6.24151	15.3651	7.65503		1.90925	1.46947	1.41865	1.43842	1.61216	1.61854	1.71509	1.63088
5.65411	3.99137	4.32902	2.45891	5.14015	5.84927	5.18118	2.11794	8.57209	1.81799	9.49467	4.93557	7.87295	2.82595	5.01762	6.48354	6.88274	5.6408	5.27044	4.39111		18.0751	4.26809	17.7562	4.24515	9.76613	5.13318	13.6831	5.94091	22.0518	4.00191	5.45673	5.95927	16.6479	6.55359	20.2207	4.68343	16.0466	6.24381	15.4133	7.60455		1.89075	1.46713	1.4229	1.44034	1.61323	1.64087	1.70765	1.63067
5.64358	3.97362	4.3523	2.47166	5.15512	5.85426	5.25769	2.07691	8.58984	1.78749	9.60001	4.76813	7.75264	2.78603	5.03093	6.47079	7.00083	5.66853	5.27044	4.29963		18.0384	4.30251	17.786	4.23597	9.48388	5.13777	13.7359	5.9455	22.038	3.97667	5.4269	6.01663	16.6456	6.53523	20.2023	4.62836	16.0558	6.24381	15.4661	7.57013		1.88543	1.46713	1.42417	1.43991	1.61854	1.65555	1.69935	1.62705
5.63637	3.97251	4.36783	2.49329	5.13294	5.86036	5.34751	2.06859	8.65748	1.76088	9.65047	4.72599	7.5292	2.7134	4.98325	6.45582	7.12613	5.67407	5.24272	4.25417		18.0132	4.32316	17.8067	4.24285	9.24753	5.13548	13.7818	5.95468	22.0174	3.95372	5.39019	6.04646	16.6479	6.51228	20.1908	4.60541	16.0673	6.24381	15.5028	7.56554		1.89075	1.47032	1.41992	1.44565	1.61131	1.66405	1.69872	1.61599
5.63803	3.9775	4.37448	2.49218	5.08415	5.86701	5.46283	2.06804	8.72345	1.75201	9.66987	4.7027	7.26529	2.66128	4.93501	6.51404	7.15385	5.67074	5.22276	4.2087		17.9788	4.33005	17.8113	4.28186	9.04331	5.13548	13.8048	5.95697	21.9876	3.93536	5.35118	6.05794	16.6456	6.48704	20.1885	4.60082	16.0673	6.24381	15.512	7.57931		1.8933	1.45863	1.42226	1.45182	1.61323	1.67043	1.69914	1.61812
5.65411	3.97251	4.37614	2.49162	5.08582	5.8781	5.62417	2.06582	8.73953	1.76532	9.66765	4.64504	7.09287	2.62691	4.90174	6.73138	7.15385	5.6591	5.22775	4.14328		17.9306	4.32316	17.7998	4.34841	8.83449	5.13777	13.8002	5.96615	21.9531	3.92389	5.31217	6.06941	16.6387	6.45262	20.1794	4.61688	16.0581	6.2461	15.489	7.58619		1.8899	1.46182	1.42673	1.45225	1.61344	1.67426	1.70871	1.61961
5.65189	3.96919	4.37947	2.48497	5.09635	5.88586	5.79161	2.06859	8.73399	1.76532	9.66322	4.6151	7.07734	2.57811	4.88179	6.87941	7.17936	5.64524	5.23551	4.08506		17.8686	4.32775	17.7837	4.45396	8.65551	5.12859	13.8002	5.97762	21.9141	3.92848	5.26857	6.09006	16.6341	6.39984	20.1656	4.64671	16.0421	6.26675	15.4225	7.57931		1.89266	1.46288	1.42673	1.45246	1.61387	1.67362	1.72424	1.61514
5.65078	3.96531	4.38058	2.4822	5.09857	5.89529	5.89584	2.06693	8.74286	1.75035	9.66433	4.60346	7.03021	2.53265	4.88179	6.9975	7.20431	5.64025	5.24272	4.03738		17.7722	4.35988	17.7654	4.49297	8.52012	5.09417	13.8575	5.99139	21.8614	3.95602	5.20891	6.11301	16.6318	6.35395	20.1633	4.66966	16.0076	6.32182	15.333	7.57931		1.88416	1.45884	1.41142	1.45246	1.6145	1.67596	1.74678	1.61557
5.64302	3.94424	4.36062	2.48275	5.09192	5.89584	5.94463	2.06915	8.74009	1.7387	9.67098	4.58405	6.84836	2.51768	4.88899	7.12835	7.17215	5.64247	5.20613	3.9897		17.6598	4.3943	17.747	4.49985	8.38933	5.07811	14.2155	6.00745	21.7856	3.99503	5.14007	6.13137	16.6318	6.30576	20.161	4.67654	15.9595	6.36772	15.2275	7.57931		1.8714	1.45225	1.41142	1.46224	1.61493	1.67915	1.75018	1.61046
5.61918	3.91485	4.33123	2.48275	5.07417	5.87533	5.96348	2.08023	8.63031	1.73815	9.67264	4.58405	6.65764	2.5077	4.88123	7.21983	7.11116	5.63914	5.09691	3.98194		17.5588	4.39889	17.7286	4.51821	8.26771	5.07352	14.9039	6.02352	21.6938	4.02027	5.06664	6.13366	16.6295	6.23692	20.1633	4.66507	15.9067	6.39525	15.0875	7.57701		1.86374	1.45076	1.41142	1.45267	1.61833	1.67511	1.73529	1.61068
5.61586	3.86218	4.32014	2.48164	5.05033	5.86369	5.98622	2.08134	8.47174	1.73926	9.65989	4.51974	6.55118	2.50826	4.87181	7.26197	7.09508	5.62473	5.01041	3.98471		17.4693	4.39889	17.7126	4.53427	8.12773	5.04599	15.6588	6.02581	21.6112	4.02027	4.99091	6.11301	16.618	6.19103	20.1725	4.6513	15.8516	6.40214	14.9659	7.57701		1.86374	1.45225	1.39079	1.44161	1.6145	1.69085	1.73402	1.60408
5.61142	3.74353	4.32014	2.47832	5.0459	5.85592	5.98289	2.07635	8.291	1.74536	9.54512	4.44489	6.534	2.5077	4.90285	7.28858	7.09952	5.62417	4.99655	3.98471		17.3753	4.40118	17.6942	4.5251	7.94645	5.02304	16.6387	6.02581	21.547	4.0042	4.89683	6.07629	16.5974	6.18644	20.1885	4.63983	15.7736	6.39066	14.8924	7.57701		1.87586	1.45203	1.39525	1.44629	1.61025	1.6766	1.73189	1.60174
5.60199	3.55225	4.31904	2.47388	5.04257	5.86369	5.99564	2.0758	8.13908	1.74425	9.39654	4.42549	6.57669	2.51768	4.90895	7.31131	7.09564	5.62639	4.98879	3.97307		17.2651	4.39889	17.6805	4.5251	7.756	5.01845	17.9443	6.02581	21.4873	3.98355	4.77063	6.04417	16.5836	6.19332	20.2	4.63295	15.6772	6.38378	14.8213	7.57472		1.88394	1.44778	1.39185	1.45054	1.60812	1.67724	1.72998	1.60132
5.60033	3.34157	4.30018	2.48941	5.03315	5.90139	6.09544	2.07691	8.12855	1.71597	9.33943	4.4205	6.61661	2.51325	4.96495	7.33127	7.09786	5.5959	4.95608	3.88381		17.1137	4.38971	17.6759	4.51592	7.54718	5.00927	19.0458	6.02811	21.4277	3.97208	4.60082	6.0327	16.5698	6.22086	20.2252	4.62836	15.5877	6.34707	14.7823	7.56783		1.88118	1.44204	1.41056	1.44991	1.60642	1.67192	1.72998	1.60132
5.6031	3.22348	4.27357	2.52212	5.04368	5.94796	6.23571	2.08079	8.04871	1.61063	9.33832	4.42382	6.66263	2.51214	5.13294	7.35567	7.09453	5.53602	4.9461	3.70971		16.9462	4.39889	17.6782	4.51133	7.29477	4.97256	19.8512	6.04187	21.3749	3.95602	4.44478	6.02811	16.5515	6.2874	20.2551	4.62606	15.5005	6.2874	14.8029	7.55865		1.88118	1.44225	1.40546	1.44991	1.61238	1.67235	1.7287	1.59813
5.60698	3.17524	4.27357	2.57701	5.03536	5.99453	6.33551	2.0819	7.85521	1.47646	9.36105	4.4266	6.74468	2.50659	5.17785	7.37784	7.02966	5.47004	4.94499	3.49127		16.8039	4.4792	17.6759	4.53198	7.04924	4.93355	20.5304	6.08318	21.306	3.90553	4.35758	6.01434	16.5354	6.36313	20.2666	4.61918	15.4064	6.24839	14.8328	7.5403		1.87012	1.44587	1.40418	1.45076	1.61493	1.67022	1.7102	1.61514
5.59645	3.13865	4.29131	2.60861	5.00598	6.03612	6.35713	2.08467	7.67114	1.41713	9.37048	4.42937	6.84171	2.49717	5.15069	7.39891	6.93153	5.4146	4.93778	3.28502		16.6754	4.57328	17.6782	4.55952	6.83813	4.87848	20.6314	6.15431	21.2074	3.86423	4.33005	6.00286	16.5194	6.42738	20.2666	4.60082	15.3284	6.23922	14.8672	7.50129		1.87373	1.44906	1.4229	1.44948	1.61323	1.66235	1.6715	1.60983
5.59368	3.11314	4.30351	2.60584	4.98768	6.03334	6.35713	2.08689	7.51479	1.41325	9.34331	4.43325	6.86887	2.49717	5.13239	7.42331	6.89438	5.38854	4.93168	3.15195		16.5354	4.64901	17.6782	4.55263	6.61554	4.8257	20.9366	6.22086	21.111	3.84587	4.37594	6.00057	16.4941	6.52376	20.278	4.58017	15.271	6.23922	14.9246	7.45998		1.86969	1.46862	1.44097	1.45203	1.61153	1.64725	1.67022	1.61046
5.59091	3.09817	4.3024	2.60639	4.97604	6.01172	6.3599	2.08522	7.45048	1.4127	9.33721	4.44711	6.8722	2.49495	5.103	7.43772	6.89604	5.38687	4.93335	3.04051		16.3771	4.6949	17.6828	4.55493	6.39525	4.82111	21.9095	6.28511	21.0422	3.8344	4.39659	5.99139	16.4666	6.63849	20.2987	4.57099	15.216	6.23922	14.9704	7.42556		1.87735	1.47117	1.4363	1.45161	1.6128	1.66086	1.69127	1.59026
5.59257	3.07821	4.3024	2.61859	4.95941	5.99065	6.32664	2.08689	7.43495	1.4127	9.34109	4.46652	6.87941	2.49606	5.0958	7.41333	6.89493	5.3902	4.93224	2.94182		16.2165	4.70179	17.6828	4.55952	6.2025	4.8234	22.7264	6.35624	20.9641	3.82981	4.38053	5.98221	16.4459	6.70274	20.3056	4.58017	15.1586	6.24839	14.9888	7.4072		1.88586	1.47117	1.41248	1.45565	1.61514	1.66001	1.71509	1.59196
5.60144	3.06934	4.29242	2.633	4.94333	5.98123	6.32997	2.09077	7.45158	1.4127	9.33832	4.48869	6.87497	2.49772	5.12906	7.34236	6.89715	5.38854	4.92448	2.89026		16.0742	4.69261	17.6759	4.55493	6.01434	4.80505	23.642	6.4205	20.8723	3.8321	4.37365	5.97074	16.4367	6.75322	20.2941	4.60082	15.1012	6.23922	15.0003	7.39803		1.85906	1.47564	1.37633	1.45501	1.61216	1.6564	1.70744	1.5909
5.60698	3.06934	4.2963	2.64132	4.92725	5.98178	6.3283	2.09299	7.50814	1.40272	9.3361	4.52307	6.86111	2.49772	5.11797	7.24256	6.90491	5.3647	4.89287	2.86365		15.9526	4.67195	17.6644	4.53886	5.83306	4.78439	24.8766	6.51687	20.7851	3.82063	4.36906	5.96844	16.4367	6.80141	20.2826	4.58935	15.0485	6.21397	14.9773	7.39344		1.79888	1.48138	1.3474	1.46096	1.6094	1.6564	1.70765	1.59069
5.60754	3.07267	4.30129	2.65518	4.93446	5.98123	6.35602	2.09409	7.53586	1.39107	9.33666	4.56243	6.83006	2.49661	5.12684	7.1727	6.90935	5.3026	4.89232	2.83482		15.847	4.63295	17.6529	4.50444	5.6862	4.76374	25.939	6.63849	20.714	3.78162	4.34611	5.96386	16.4344	6.83583	20.2941	4.58935	15.0026	6.20939	14.8924	7.39573		1.78931	1.4867	1.34081	1.46501	1.60217	1.65342	1.71126	1.58984
5.58314	3.06602	4.29187	2.65906	4.96162	5.984	6.38097	2.10906	7.52699	1.39773	9.33666	4.59237	6.77407	2.49606	5.12684	7.16328	6.90824	5.23108	4.87569	2.81042		15.7369	4.59623	17.646	4.46314	5.56688	4.72932	26.6595	6.66144	20.6544	3.75867	4.33005	5.96156	16.4276	6.85648	20.3285	4.61918	14.9613	6.20021	14.7983	7.40491		1.7959	1.48308	1.34081	1.46501	1.6043	1.65342	1.71126	1.57899
5.54766	3.04661	4.26747	2.65851	4.94056	5.98899	6.35325	2.12182	7.53198	1.4005	9.33555	4.60346	6.75743	2.49606	5.22221	7.16328	6.90436	5.17508	4.86349	2.79545		15.6267	4.55952	17.6392	4.43101	5.46362	4.69949	27.1758	6.61554	20.597	3.73343	4.33464	5.95697	16.4161	6.88402	20.3905	4.64901	14.92	6.18644	14.7089	7.44392		1.78527	1.52519	1.34081	1.47713	1.60451	1.65767	1.70999	1.57261
5.54655	3.04717	4.2525	2.65851	4.92281	5.98733	6.31777	2.12182	7.54528	1.40105	9.33111	4.60623	6.72528	2.49384	5.60754	7.15995	6.88218	5.13294	4.88068	2.78825		15.5212	4.49526	17.6208	4.39659	5.38789	4.67884	27.4879	6.61095	20.5419	3.68295	4.34382	5.94779	16.4023	6.92073	20.5006	4.67425	14.8718	6.17038	14.5849	7.47834		1.74742	1.559	1.33571	1.4867	1.60536	1.6581	1.70999	1.57729
5.5155	3.05049	4.2392	2.66017	4.93723	5.98622	6.31555	2.11461	7.46489	1.40161	9.31947	4.60124	6.57225	2.48331	5.84096	7.15884	6.84892	5.11298	4.88012	2.79046		15.4225	4.45167	17.5956	4.34841	5.35347	4.66507	27.6623	6.62931	20.4501	3.66	4.36676	5.93861	16.3886	6.94598	20.675	4.71096	14.819	6.15431	14.4381	7.48293		1.70084	1.559	1.32805	1.49563	1.60812	1.6581	1.71254	1.57942
5.53602	3.03552	4.23033	2.66793	4.98713	5.98733	6.41258	2.12015	7.39448	1.40161	9.30894	4.67055	6.48853	2.47887	5.80713	7.15995	6.84614	5.10134	4.80971	2.81098		15.3261	4.42183	17.568	4.29563	5.34659	4.66507	27.8023	6.63849	20.3079	3.64165	4.40807	5.92255	16.3633	6.96204	20.8127	4.75456	14.7662	6.13366	14.3142	7.48063		1.70488	1.56325	1.32529	1.50796	1.60408	1.6615	1.71254	1.58133
5.56596	3.03386	4.21258	2.67071	5.05421	5.96071	6.51681	2.15176	7.40446	1.42378	9.30228	4.76979	6.47135	2.48164	5.90361	7.15995	6.85113	5.09801	4.6966	2.81818		15.2343	4.37135	17.529	4.27957	5.33511	4.66048	27.9262	6.71651	20.1426	3.59116	4.43331	5.90419	16.3266	7.00334	20.8517	4.78898	14.7157	6.09924	14.2086	7.48063		1.71509	1.56729	1.32614	1.49839	1.5892	1.66554	1.69893	1.58133
5.5654	3.0638	4.18043	2.6768	5.09524	5.94242	6.56504	2.15896	7.4039	1.43266	9.30395	4.83909	6.46303	2.48109	6.01893	7.14387	6.83062	5.10134	4.61788	2.81597		15.1403	4.32546	17.4785	4.29104	5.40625	4.61459	27.9858	6.87714	19.9728	3.55215	4.46314	5.9019	16.2945	7.07218	20.8632	4.82799	14.6836	6.08318	14.1421	7.47834		1.68574	1.57899	1.33188	1.49159	1.58835	1.66809	1.70084	1.59239
5.56429	3.06546	4.16102	2.67902	5.06697	5.94408	6.59332	2.15675	7.40557	1.42711	9.29785	4.91727	6.46247	2.48608	6.09322	7.13445	6.7031	5.09857	4.56909	2.80654		15.0554	4.29563	17.4074	4.28645	5.67932	4.59623	27.9858	6.94139	19.826	3.5315	4.52739	5.91108	16.2623	7.1525	20.9022	4.88765	14.6767	6.074	14.1467	7.46457		1.65066	1.5892	1.3557	1.48818	1.58813	1.6732	1.70127	1.60026
5.52825	3.06546	4.15825	2.68069	5.04479	5.92357	6.59665	2.15508	7.39337	1.46537	9.24906	4.96828	6.46247	2.49107	6.13591	7.12391	6.56504	5.06863	4.54025	2.79046		14.9659	4.25203	17.2881	4.25203	5.93173	4.62606	28.1143	6.91614	19.7089	3.51085	4.58935	5.91796	16.2302	7.26264	20.9527	4.97485	14.663	6.06482	14.165	7.44621		1.64768	1.58984	1.36208	1.4884	1.58856	1.67213	1.69978	1.59813
5.47337	3.05493	4.14716	2.68013	5.05643	5.91968	6.59665	2.15508	7.38117	1.47313	9.1476	4.95663	6.46303	2.48719	6.14922	7.1217	6.52845	4.98657	4.5397	2.79601		14.881	4.15336	17.1091	4.24056	6.09924	4.62147	28.4126	6.86107	19.585	3.51085	4.62377	5.90878	16.205	7.40032	21.0146	5.08041	14.6331	6.04417	14.165	7.41868		1.65023	1.5892	1.36442	1.46883	1.58984	1.66958	1.69404	1.5977
5.43345	3.04938	4.11279	2.67958	5.04701	5.92024	6.59554	2.16118	7.41832	1.47535	9.09215	4.94	6.45527	2.48386	6.14423	7.11892	6.52457	4.83466	4.5336	2.79379		14.8351	4.07763	16.9117	4.24056	6.22774	4.58935	28.844	6.79912	19.4818	3.51085	4.66507	5.88125	16.1637	7.51964	21.1523	5.17219	14.5918	6.01663	14.2132	7.39803		1.65129	1.58835	1.36187	1.46692	1.61195	1.6632	1.6934	1.59366
5.378	3.04938	4.05623	2.68124	5.03259	5.92024	6.59554	2.17338	7.38672	1.47701	9.08605	4.94665	6.39539	2.48774	6.12871	7.1217	6.478	4.65447	4.52639	2.79878		14.7915	4.05239	16.6915	4.24515	6.14972	4.57787	29.4475	6.77388	19.406	3.51314	4.72703	5.83306	16.1086	7.63667	21.2854	5.23644	14.5413	5.98221	14.3004	7.39344		1.65129	1.58643	1.3625	1.46628	1.61472	1.65321	1.69149	1.59792
5.33587	3.05271	3.95533	2.69455	5.03259	5.92578	6.5778	2.17504	7.35678	1.46814	9.07829	4.95054	6.28062	2.49661	6.12981	7.12336	6.42311	4.52418	4.52418	2.79213		14.6698	3.99273	16.4551	4.2635	6.25298	4.59164	30.0143	6.77158	19.3097	3.51314	4.74997	5.78487	16.0558	7.75829	21.3175	5.29611	14.4886	5.97074	14.3256	7.39114		1.65151	1.58516	1.36272	1.46373	1.61387	1.63428	1.68511	1.5943
5.327	3.05881	3.87715	2.73835	5.02705	5.88808	6.53178	2.1756	7.32905	1.45262	9.04502	4.94998	6.21132	2.49772	6.11983	7.12391	6.40869	4.45155	4.51974	2.79878		14.484	3.93995	16.2233	4.29104	6.47098	4.62836	30.3815	6.77158	19.1949	3.51314	4.74079	5.75504	16.0053	7.86155	21.3428	5.33741	14.4312	5.96386	14.3027	7.37278		1.65172	1.58665	1.3625	1.46373	1.62684	1.6262	1.66044	1.58601
5.3281	3.06047	3.87715	2.79379	5.04313	5.86701	6.46192	2.18391	7.27583	1.44319	9.01564	4.95497	6.21187	2.50216	6.11263	7.13168	6.40869	4.41717	4.52695	2.801		14.2293	3.92848	15.9778	4.29792	6.549	4.6949	30.6913	6.76929	19.0963	3.51085	4.87159	5.70456	15.9411	7.9694	21.4139	5.35118	14.3647	5.92485	14.2752	7.33378		1.66256	1.58516	1.36569	1.46352	1.64258	1.62599	1.61131	1.56559
5.33254	3.07988	3.86218	2.81209	5.08859	5.87866	6.40814	2.18391	7.24478	1.44707	8.98903	4.96107	6.17528	2.51436	6.11595	7.15053	6.39594	4.41329	4.53416	2.79767		13.9057	3.92619	15.73	4.30251	6.6775	4.76604	30.9391	6.78305	19.0068	3.50167	5.10106	5.62424	15.8723	8.11396	21.4529	5.3856	14.2752	5.89043	14.2614	7.26035		1.66469	1.58069	1.38675	1.46075	1.64258	1.62599	1.59132	1.56155
5.33753	3.08764	3.84111	2.81153	5.09524	5.91858	6.39095	2.17892	7.23813	1.44707	8.9358	4.96883	6.16641	2.51657	6.11651	7.15496	6.37432	4.41052	4.53416	2.78935		13.5615	3.92619	15.489	4.31169	6.8932	4.83488	31.0056	6.83124	18.9035	3.49938	5.23874	5.56458	15.8011	8.2264	21.4277	5.46362	14.1719	5.87895	14.2752	7.14561		1.6632	1.5892	1.39376	1.46309	1.65321	1.62216	1.59132	1.55985
5.31923	3.09817	3.80286	2.82262	5.09081	5.94463	6.37598	2.17671	7.23591	1.44707	8.86982	4.98491	6.14423	2.51325	6.11318	7.15164	6.37709	4.40664	4.52528	2.78381		13.2013	3.92619	15.2297	4.31169	7.0194	4.92207	31.001	6.92991	18.8026	3.50397	5.27775	5.53705	15.7116	8.29295	21.4116	5.54852	14.0641	5.8606	14.2958	7.04006		1.66618	1.61578	1.39398	1.47011	1.65385	1.62429	1.58771	1.55836
5.27266	3.1076	3.7707	2.86309	5.16122	5.96792	6.35935	2.1695	7.22094	1.44763	8.81715	4.99212	6.1215	2.50826	6.13869	7.14332	6.39816	4.39832	4.51531	2.77937		12.8295	3.91701	14.9704	4.3094	7.06989	5.02533	31.0607	7.01711	18.6878	3.50397	5.29611	5.51639	15.5992	8.36867	21.446	5.6426	13.9585	5.83765	14.282	6.95056		1.65619	1.61429	1.3944	1.47798	1.65385	1.62046	1.58835	1.56985
5.2211	3.10704	3.7646	2.97398	5.24438	5.97735	6.36379	2.17282	7.22094	1.45483	8.7789	4.996	6.14035	2.50826	6.13924	7.13389	6.41757	4.39555	4.51697	2.79102		12.4945	3.87341	14.7662	4.29792	7.08366	5.11024	31.2351	7.06759	18.557	3.50626	5.30528	5.49115	15.4753	8.48341	21.4598	5.73668	13.8736	5.82388	14.2568	6.86566		1.65512	1.59579	1.39398	1.47798	1.64789	1.62237	1.5892	1.57878
5.2211	3.11758	3.75518	3.07433	5.25492	5.97901	6.3782	2.19611	7.17936	1.47368	8.70405	4.99933	6.16364	2.50493	6.14867	7.1217	6.41757	4.40165	4.51863	2.80488		12.1755	3.83669	14.6171	4.30022	7.07677	5.15384	31.4439	7.11808	18.4308	3.50626	5.28922	5.45673	15.3651	8.57978	21.4667	5.81011	13.8208	5.79405	14.2453	6.77158		1.65938	1.59536	1.3978	1.47011	1.63471	1.62705	1.5892	1.57474
5.1712	3.13033	3.75462	3.08099	5.26046	5.94741	6.38264	2.20609	7.06681	1.47923	8.58984	4.99822	6.16474	2.49107	6.17417	7.09009	6.41036	4.40054	4.52196	2.80211		11.8451	3.81604	14.4817	4.30022	7.09283	5.20202	31.6481	7.14791	18.3092	3.4879	5.30069	5.36495	15.2848	8.62338	21.5791	5.88584	13.8093	5.76651	14.2201	6.64767		1.67341	1.57048	1.40376	1.47011	1.63747	1.61833	1.58154	1.57793
5.13738	3.09596	3.58774	3.0893	5.33143	5.8903	6.38042	2.20886	7.02356	1.47923	8.52053	4.99711	6.16253	2.49273	6.19746	6.97754	6.40925	4.40608	4.52251	2.79601		11.5904	3.79539	14.3348	4.30022	7.1066	5.27775	31.8088	7.15479	18.1646	3.46266	5.33053	5.22038	15.2091	8.64174	21.6824	5.93861	13.83	5.75045	14.1903	6.46868		1.67511	1.5456	1.40461	1.4733	1.64172	1.62344	1.58452	1.57261
5.13849	3.07932	3.3704	3.11702	5.35638	5.83375	6.3782	2.20886	7.0851	1.47147	8.52552	4.99822	6.08158	2.48996	6.20577	6.80789	6.41646	4.40608	4.51531	2.76884		11.3862	3.79768	14.1765	4.30022	7.1066	5.33282	31.8776	7.15709	17.9971	3.45119	5.31676	5.10794	15.1219	8.67157	21.6227	5.94091	13.8874	5.74127	14.1627	6.28511		1.68957	1.5539	1.40504	1.46522	1.6379	1.62344	1.58984	1.57304
5.13239	3.08819	3.36208	3.15029	5.34973	5.81767	6.366	2.18391	7.20486	1.46426	8.55823	5.01596	6.0339	2.49384	6.20965	6.697	6.40869	4.39721	4.50311	2.69787		11.159	3.83899	14.0503	4.30481	7.10201	5.35806	31.9556	7.1525	17.8457	3.43971	5.30299	5.0391	15.0462	8.69911	21.7535	5.93632	13.9355	5.73668	14.1306	6.13137		1.68617	1.56049	1.40929	1.44097	1.6379	1.6228	1.59877	1.57644
5.13073	3.09762	3.35377	3.13698	5.33254	5.84373	6.366	2.14621	7.27638	1.46426	8.58817	5.03204	6.03556	2.49218	6.19746	6.69811	6.41313	4.39278	4.49535	2.63966		10.9708	3.89406	13.9562	4.32546	7.10431	5.40395	32.2218	7.1502	17.7057	3.43971	5.28693	4.98632	14.9796	8.72894	21.9944	5.92026	13.9516	5.73898	14.1191	5.99369		1.69999	1.57027	1.40844	1.42864	1.65852	1.62556	1.60111	1.5758
5.1091	3.09928	3.35432	3.08265	5.3342	5.87644	6.3466	2.1451	7.42275	1.46814	8.57431	5.03259	6.04277	2.49218	6.18692	6.79791	6.40925	4.39721	4.4959	2.62746		10.8653	3.96978	13.8369	4.33923	7.10431	5.46821	32.6739	7.1525	17.5565	3.44201	5.2571	4.99091	14.9223	8.77483	22.318	5.88125	13.9447	5.73439	14.1099	5.84224		1.70829	1.58154	1.41142	1.42162	1.66958	1.63045	1.60153	1.57537
4.98047	3.08875	3.35377	3.03663	5.33309	5.90305	6.29781	2.13789	7.60405	1.47368	8.46952	5.03259	6.07049	2.49883	6.19247	6.88495	6.37709	4.40331	4.49756	2.63855		10.785	4.06387	13.6854	4.35988	7.16856	5.52098	33.0869	7.15709	17.412	3.43971	5.23874	5.05516	14.8833	8.82761	22.6392	5.86748	13.8897	5.74586	14.1834	5.66555		1.70616	1.58388	1.43098	1.41163	1.67277	1.60876	1.60047	1.55879
4.92559	3.07932	3.34878	3.01224	5.33919	5.93188	6.24126	2.1318	7.69332	1.46925	8.39911	5.03093	6.08712	2.51436	6.18803	6.87442	6.37986	4.40386	4.4898	2.62857		10.7597	4.13041	13.5455	4.41036	7.33378	5.57147	33.3187	7.1525	17.2674	3.43742	5.2135	5.085	14.8419	8.87121	22.8045	5.88125	13.8002	5.75733	14.2476	5.4705		1.70573	1.58197	1.43481	1.39866	1.69021	1.57431	1.6111	1.54156
4.92669	3.08099	3.34434	3.01113	5.33864	5.93743	6.20688	2.11184	7.71549	1.45982	8.38359	5.04645	6.08879	2.51768	6.1531	6.85058	6.3782	4.41273	4.47705	2.62857		10.7712	4.14418	13.4353	4.48379	7.42327	5.6013	33.3783	7.14332	17.116	3.43513	5.1699	5.10565	14.7777	8.89874	22.8343	5.88813	13.7474	5.75504	14.2775	5.31676		1.70467	1.58324	1.43523	1.38972	1.69893	1.559	1.6111	1.54156
4.92669	3.0699	3.33325	3.0139	5.33864	5.91858	6.20078	2.07247	7.7288	1.46592	8.37971	5.0581	6.08934	2.51768	6.13758	6.84614	6.37876	4.42271	4.47095	2.63744		10.746	4.14418	13.3389	4.50674	7.4531	5.60589	33.4013	7.14102	16.9645	3.43742	5.14007	5.13318	14.7318	8.90104	22.7173	5.89731	13.7979	5.75275	14.4151	5.24792		1.70467	1.58367	1.43715	1.38717	1.70999	1.56985	1.61089	1.54071
4.90174	3.05105	3.31884	3.01113	5.35527	5.93077	6.20023	2.03976	7.73157	1.45151	8.37693	5.06253	6.08324	2.51824	6.12316	6.85501	6.38319	4.42604	4.4715	2.633		10.6794	4.14418	13.2357	4.5228	7.54489	5.60589	33.4563	7.13873	16.8062	3.4443	5.17908	5.14236	14.6974	8.90792	22.6668	5.88125	14.0732	5.75963	14.9039	5.20202		1.68468	1.58409	1.47734	1.38696	1.74359	1.5875	1.60472	1.53667
4.90119	3.04495	3.31773	3.01002	5.3281	5.95517	6.17583	2.0004	7.73823	1.45151	8.34034	5.07362	6.06994	2.52045	6.10819	6.87442	6.38319	4.41772	4.46762	2.61526		10.6152	4.14188	13.1209	4.58935	7.64126	5.60589	33.5183	7.13414	16.6593	3.4466	5.23874	5.14466	14.6125	8.97906	22.7677	5.8606	14.4771	5.79175	15.6611	5.15384		1.67171	1.57367	1.4969	1.39185	1.75677	1.59281	1.60898	1.55709
4.88567	3.0333	3.31607	3.00503	5.31313	5.98455	6.13425	1.96269	7.74044	1.45095	8.28157	5.09192	6.03057	2.52212	6.1154	6.89105	6.37765	4.41994	4.44822	2.61526		10.5578	4.15106	13.0016	4.68113	7.64126	5.60589	33.5573	7.14102	16.4826	3.43971	5.30299	5.14695	14.4817	9.08002	22.8022	5.86289	14.8718	5.81241	16.1866	5.11483		1.6917	1.56538	1.49435	1.41227	1.75656	1.5909	1.60919	1.61174
4.82412	3.02332	3.31163	3.00614	5.46893	6.02891	6.12815	1.9577	7.75209	1.45483	8.26327	5.11687	6.00063	2.52212	6.09988	6.8905	6.3466	4.41994	4.42216	2.61526		10.5234	4.18548	12.8869	4.77292	7.73993	5.59671	33.6055	7.1502	16.2578	3.43742	5.3833	5.13777	14.3348	9.1328	22.7792	5.86748	15.2642	5.80323	16.3954	5.07811		1.70233	1.56581	1.49605	1.41461	1.7589	1.59047	1.60898	1.65385
4.74096	3.08598	3.30997	3.01556	5.55709	6.07382	6.15144	1.94939	7.7787	1.44763	8.41131	5.19781	6.00174	2.52378	6.08657	6.89327	6.28284	4.41717	4.38113	2.60916		10.4981	4.2222	12.7744	4.87618	8.0107	5.57376	33.672	7.15479	16.0237	3.43742	5.43838	5.1263	14.1926	9.1328	22.7081	5.88354	15.3973	5.78258	16.5148	5.03451		1.7085	1.56134	1.50094	1.40737	1.75847	1.59047	1.61174	1.67447
4.69439	3.12922	3.30165	3.0261	5.55431	6.11429	6.19302	1.9505	7.84191	1.44208	8.78444	5.26213	6.00285	2.52378	6.10098	6.89937	6.26787	4.40054	4.36339	2.59253		10.5004	4.28186	12.662	4.9978	8.60732	5.53705	33.7248	7.15709	15.7965	3.43742	5.46362	5.11024	14.048	9.11444	22.6461	5.92026	15.1793	5.80323	16.657	5.00239		1.75316	1.55475	1.48989	1.40312	1.75635	1.5909	1.61174	1.68511
4.6955	3.13477	3.28446	3.02942	5.58924	6.13259	6.22518	1.94883	8.0659	1.44929	9.01287	5.2649	6.01061	2.52489	6.09156	6.89881	6.27009	4.37004	4.36838	2.58532		10.5693	4.35758	12.5197	5.14236	9.20623	5.51639	33.7592	7.15479	15.551	3.43742	5.48197	5.06434	13.869	9.10526	22.7746	5.95697	14.9704	5.817	16.7695	4.9955		1.82078	1.55475	1.48351	1.4044	1.7538	1.59175	1.61153	1.6715
4.6966	3.12922	3.2706	3.04218	5.6153	6.12427	6.22518	1.9444	8.38414	1.44984	8.99845	5.44953	6.02336	2.52323	6.06716	6.8966	6.25623	4.34066	4.35785	2.58643		10.7001	4.36906	12.3408	5.29381	9.45176	5.5141	33.7753	7.14791	15.3284	3.43283	5.47738	5.00239	13.6349	9.10297	23.2198	5.99139	14.8718	5.75963	16.8291	5.00698		1.83801	1.55496	1.49499	1.40461	1.74465	1.59196	1.61131	1.6766
4.67831	3.12811	3.27005	3.04384	5.62084	6.1154	6.24791	1.94939	8.58485	1.45483	9.01398	5.74781	6.07326	2.52655	6.0655	6.89771	6.20189	4.31405	4.29686	2.5953		10.8354	4.3507	12.1572	5.39478	9.51601	5.50951	33.7914	7.15709	15.1609	3.42595	5.44067	4.9519	13.4261	9.11903	23.5617	6.00975	14.7685	5.61965	16.9049	5.03681		1.83843	1.55836	1.50265	1.39483	1.74635	1.58984	1.61068	1.69319
4.50921	3.12811	3.26949	3.04107	5.62306	6.09655	6.26621	1.93996	8.65859	1.45539	9.11876	5.96182	6.14811	2.52323	6.07881	6.89715	6.16031	4.27967	4.21314	2.56814		10.9158	4.37365	11.9736	5.46591	9.52978	5.50263	33.8189	7.16397	14.9268	3.40988	5.39937	4.89224	13.2678	9.16263	23.743	6.00975	14.5253	5.48886	16.9072	5.085		1.83673	1.5556	1.50413	1.38164	1.74678	1.58771	1.61068	1.6934
4.31238	3.12534	3.26617	3.03885	5.61974	6.08158	6.27785	1.93941	8.6547	1.4565	9.22189	6.05885	6.18803	2.51214	6.08823	6.89715	6.16142	4.26027	4.20316	2.54818		10.9249	4.42413	11.7694	5.51181	9.52748	5.50263	33.851	7.16167	14.5987	3.40529	5.36953	4.85553	13.1324	9.22459	23.8784	6.01893	14.3073	5.37871	17.1756	5.14466		1.83376	1.55624	1.51179	1.38356	1.74678	1.58665	1.60919	1.69446
4.25749	3.10926	3.27836	3.01224	5.61696	6.09821	6.32276	1.93553	8.61423	1.45761	9.26292	6.07437	6.21409	2.50826	6.09045	6.89826	6.11152	4.26803	4.20427	2.54818		10.8882	4.47691	11.5537	5.52328	9.61009	5.49804	33.8831	7.15938	14.3532	3.40759	5.33053	4.83947	12.9993	9.2613	23.9311	6.05564	14.087	5.28234	18.1577	5.19514		1.83333	1.56602	1.53497	1.37845	1.74508	1.59643	1.60664	1.68383
4.26526	3.10372	3.29611	2.98729	5.61696	6.10764	6.41036	1.9261	8.56267	1.45816	9.27123	6.07382	6.25733	2.50992	6.0899	6.89604	5.98622	4.26803	4.19096	2.55317		10.8125	4.54345	11.3586	5.53246	9.87627	5.49574	33.9382	7.17085	14.2522	3.38235	5.28234	4.8234	12.8593	9.26589	23.899	6.09695	13.9562	5.23644	19.3005	5.23644		1.83524	1.56538	1.53922	1.36016	1.74699	1.60323	1.60366	1.69404
4.26082	3.09928	3.29832	2.95735	5.61253	6.10431	6.43697	1.92277	8.49281	1.45594	9.279	6.07714	6.28062	2.50715	6.09378	6.90325	5.87367	4.26692	4.13275	2.56315		10.7207	4.59164	11.1751	5.53934	10.3352	5.48656	34.0071	7.20757	14.1054	3.34563	5.25939	4.83258	12.7148	9.26818	23.8439	6.12448	13.8828	5.24562	20.5006	5.28004		1.83716	1.57048	1.5371	1.36208	1.74784	1.60366	1.61025	1.69957
4.26193	3.08209	3.27005	3.03386	5.60976	6.10653	6.40592	1.92555	8.48117	1.45594	9.27512	6.08047	6.27619	2.50715	6.07825	6.92654	5.87367	4.24696	4.0274	2.5698		10.6381	4.61	10.9984	5.53705	10.9617	5.43149	34.0071	7.23281	13.8782	3.32957	5.28004	4.83947	12.5932	9.27507	23.8485	6.12907	13.8231	5.25939	21.4231	5.342		1.84056	1.57112	1.54603	1.36102	1.74976	1.59749	1.61131	1.70297
4.25528	3.04328	3.18189	3.19021	5.60865	6.10653	6.38319	1.92056	8.47396	1.44763	9.27789	6.08269	6.28173	2.50327	6.05718	6.94871	5.90749	4.21425	4.00412	2.5759		10.5647	4.63295	10.84	5.54852	11.3862	5.37412	34.2273	7.23969	13.6877	3.32498	5.32364	4.84406	12.4991	9.27966	23.9679	6.12907	13.7244	5.28004	21.6961	5.41084		1.84141	1.57048	1.57346	1.36506	1.75273	1.59685	1.61748	1.71126
4.25084	3.03719	3.16193	3.30553	5.63415	6.13758	6.34826	1.91279	8.46398	1.41658	9.29008	6.08213	6.29559	2.50992	6.05164	6.96535	5.92079	4.21813	4.00412	2.58421		10.4867	4.65589	10.6909	5.55999	11.3885	5.40166	34.7322	7.23969	13.6189	3.33187	5.37183	4.86012	12.4073	9.28654	24.0872	6.16808	13.612	5.31217	21.6847	5.48656		1.83822	1.57367	1.58494	1.36612	1.75337	1.5943	1.6396	1.71956
4.24696	3.02055	3.16138	3.37705	5.65023	6.25733	6.33717	1.91612	8.52885	1.37888	9.29397	6.09156	6.31999	2.51325	6.05219	6.97976	5.96238	4.23033	4.00301	2.58532		10.3995	4.66278	10.528	5.58523	11.5835	5.44755	35.1475	7.23969	13.6327	3.33875	5.5141	4.88765	12.3247	9.29343	24.1124	6.25528	13.4973	5.342	21.5883	5.55999		1.83376	1.59451	1.5858	1.36633	1.75252	1.59026	1.64534	1.72211
4.24973	2.9701	3.1575	3.3959	5.6469	6.32664	6.33773	1.93386	8.72345	1.37278	9.2862	6.09655	6.32941	2.50937	6.05275	6.98919	6.0034	4.21591	4.00855	2.56924		10.3582	4.66966	10.3719	5.61048	11.6615	5.49115	35.5491	7.23969	13.6831	3.38464	5.78946	4.9106	12.2513	9.27966	24.101	6.331	13.5799	5.3397	21.6824	5.62883		1.83248	1.59409	1.59047	1.36973	1.74763	1.59111	1.63917	1.71807
4.25139	2.91854	3.12811	3.3948	5.63692	6.31278	6.33662	1.93719	9.03615	1.38109	9.27345	6.09932	6.31888	2.49717	6.05774	6.9914	5.96016	4.19484	4.01964	2.57146		10.3444	4.68572	10.248	5.64031	11.6845	5.53016	36.0241	7.23052	13.7107	3.47872	6.0327	4.9542	12.1618	9.24983	24.0688	6.36083	13.6579	5.32594	22.1252	5.68849		1.8261	1.58516	1.6128	1.37165	1.7438	1.59111	1.64194	1.71828
4.24197	2.88028	3.08376	3.38759	5.62029	6.31444	6.34216	1.93774	9.3289	1.38886	9.27345	6.11263	6.30335	2.49717	6.05663	6.99972	5.9524	4.19484	3.99414	2.57978		10.326	4.6972	10.1218	5.68161	11.7969	5.55999	36.2742	7.22134	13.6946	3.54527	6.1612	5.01157	12.0172	9.23376	23.9862	6.36542	13.6051	5.32594	22.5566	5.70685		1.83588	1.56453	1.62003	1.38271	1.737	1.58261	1.68277	1.72381
4.24973	2.85977	3.03885	3.39036	5.61419	6.30058	6.41479	1.9322	9.58837	1.38996	9.3228	6.13148	6.27951	2.49717	6.06107	7.02522	5.93964	4.19262	3.92095	2.55095		10.3375	4.70867	9.97265	5.76192	11.9805	5.6013	36.3063	7.22134	13.6877	3.58198	6.19103	5.05287	11.852	9.23147	23.8646	6.36542	13.4789	5.33053	23.0569	5.66555		1.84566	1.56091	1.62088	1.3961	1.737	1.58133	1.70467	1.72679
4.25029	2.82484	3.01168	3.49847	5.61308	6.28339	6.54619	1.93497	9.83786	1.38996	9.45309	6.13813	6.24569	2.49717	6.02835	7.03021	5.91026	4.20538	3.92206	2.54319		10.3421	4.7385	9.85562	5.83306	12.2926	5.67014	36.3109	7.21904	13.6763	3.60034	6.21168	5.07352	11.7051	9.23376	23.7361	6.36542	13.4399	5.32594	23.6764	5.57835		1.84099	1.56262	1.62492	1.391	1.74486	1.58133	1.71041	1.71849
4.23809	2.76995	3.01002	3.6271	5.59423	6.26953	6.57502	1.92277	10.0619	1.3822	9.6427	6.13813	6.23349	2.49717	5.92911	7.04241	5.88697	4.22478	3.90266	2.53598		10.3077	4.77292	9.78449	5.84912	12.6804	5.76192	36.3224	7.21675	13.6074	3.58657	6.29888	5.07582	11.5927	9.23147	23.6214	6.36772	13.417	5.32135	24.039	5.46132		1.83971	1.56495	1.6464	1.38972	1.75507	1.56495	1.69914	1.71169
4.24031	2.72227	2.99893	3.65482	5.5776	6.26343	6.56948	1.89561	10.2027	1.36391	9.76912	6.13924	6.23516	2.49717	5.90693	7.0718	5.71953	4.24086	3.89434	2.52822		10.2595	4.80505	9.7363	5.87207	13.137	5.91337	36.327	7.22363	13.5271	3.56822	6.32412	5.06664	11.4963	9.23147	23.525	6.36542	13.3527	5.31676	24.117	5.3833		1.848	1.56368	1.66405	1.38441	1.76188	1.56495	1.69425	1.70786
4.227	2.70952	2.94681	3.64873	5.55819	6.2906	6.56782	1.88563	10.2964	1.36058	9.87612	6.147	6.2346	2.50327	5.90804	7.04907	5.69458	4.2331	3.86274	2.53376		10.2251	4.83029	9.71335	5.92714	13.6785	6.06941	36.4165	7.2351	13.4973	3.52691	6.31723	5.06434	11.3517	9.22688	23.4791	6.3746	13.3321	5.31905	24.1354	5.36265		1.83588	1.5573	1.66044	1.3944	1.74869	1.57176	1.69234	1.69489
4.22256	2.70841	2.90634	3.64983	5.54433	6.29781	6.58556	1.85846	10.3646	1.35725	10.0264	6.14756	6.22906	2.50271	5.91469	7.00748	5.69181	4.23753	3.74021	2.55372		10.209	4.84176	9.69958	5.96386	14.0663	6.15661	36.483	7.23969	13.4376	3.47184	6.36313	5.09188	11.1819	9.21311	23.4263	6.38608	13.3091	5.32364	24.2317	5.37183		1.83142	1.53008	1.64258	1.38866	1.73359	1.57623	1.69914	1.69
4.22146	2.70286	2.90135	3.65205	5.54433	6.26399	6.61106	1.85181	10.3646	1.34173	10.0585	6.14589	6.22629	2.50271	5.95572	6.94428	5.66409	4.24585	3.62322	2.56924		10.326	4.86012	9.66287	5.99139	14.126	6.21856	36.4853	7.22593	13.3665	3.42595	6.67979	5.12859	11.0879	9.20623	23.3735	6.39296	13.2655	5.30528	24.491	5.38101		1.83035	1.50626	1.62492	1.38866	1.72572	1.56985	1.71594	1.68681
4.21536	2.70175	2.90689	3.6576	5.54433	6.20189	6.59554	1.84904	10.4111	1.32288	10.1023	6.14977	6.2213	2.50216	5.96958	6.85169	5.68571	4.26248	3.54227	2.55982		10.6565	4.89683	9.61468	6.04417	14.1283	6.29658	36.4853	7.20298	13.3779	3.35711	6.85419	5.15613	11.0075	9.20852	23.3254	6.39296	13.2196	5.23185	24.6609	5.37642		1.83035	1.49605	1.63556	1.38186	1.72445	1.54177	1.7202	1.6715
4.21979	2.7012	2.90579	3.66259	5.54544	6.13758	6.56948	1.85735	10.4694	1.31789	10.1883	6.14146	6.14146	2.50327	5.91691	6.83505	5.70013	4.30517	3.45689	2.53709		11.1039	4.91748	9.56649	6.074	14.1398	6.3769	36.4807	7.20527	13.5087	3.3181	6.97351	5.19055	10.8836	9.21311	23.2427	6.39755	13.1852	5.11483	24.6609	5.37412		1.83269	1.49797	1.66703	1.37803	1.71594	1.51307	1.7304	1.65427
4.22367	2.70064	2.90357	3.66536	5.54544	6.10764	6.56837	1.8568	10.4655	1.319	10.1971	6.14423	5.98289	2.50271	5.92301	6.83006	5.69791	4.33179	3.38648	2.52822		11.5858	4.92437	9.49995	6.074	14.1467	6.47327	36.4646	7.21675	13.5845	3.30892	7.12955	5.23644	10.8263	9.22688	23.2909	6.39525	13.1898	5.01616	24.6287	5.37871		1.83269	1.48563	1.69	1.37803	1.68255	1.5018	1.74082	1.64555
4.22423	2.70286	2.90745	3.67312	5.54544	6.10043	6.55063	1.85125	10.491	1.33119	10.1994	6.12649	5.85482	2.50438	5.95683	6.809	5.66132	4.33401	3.30886	2.52822		12.086	4.94502	9.41963	6.08777	14.2132	6.56965	36.4532	7.23052	13.5202	3.29974	7.1525	5.31217	10.8148	9.23606	23.4263	6.39525	13.1714	4.95879	24.5828	5.37871		1.82482	1.47351	1.69276	1.38994	1.64449	1.49095	1.74465	1.65427
4.23476	2.72282	2.91854	3.6831	5.53214	6.10043	6.55396	1.83462	10.5464	1.33119	10.1999	6.09433	5.82599	2.51713	5.96404	6.79347	5.60532	4.34232	3.20906	2.49883		12.5909	4.97256	9.33702	6.10154	14.3165	6.62243	36.483	7.2374	13.4674	3.29286	7.16167	5.3856	10.7001	9.23147	23.3781	6.39066	13.1967	4.95649	24.5117	5.36495		1.82163	1.46458	1.69276	1.38738	1.63449	1.46798	1.74678	1.66873
4.23199	2.7644	2.89082	3.68809	5.51827	6.10098	6.5717	1.8202	10.578	1.33618	10.1977	6.08269	5.83042	2.54429	5.96515	6.73747	5.54821	4.41329	3.20573	2.40402		12.9833	4.97715	9.22688	6.10383	14.3532	6.65685	36.5496	7.23969	13.4674	3.29745	7.20986	5.40625	10.5165	9.22459	23.4814	6.38837	13.1898	4.95879	24.4268	5.41084		1.83248	1.46309	1.71339	1.37739	1.63449	1.46628	1.7472	1.67937
4.19651	2.78436	2.83482	3.69197	5.50719	6.06328	6.54564	1.81355	10.5797	1.34062	10.1988	6.08158	5.83652	2.55982	5.94907	6.62714	5.5399	4.47206	3.1708	2.33583		13.1485	4.97944	9.11674	6.1153	14.3647	6.70045	36.6161	7.24887	13.4399	3.30662	7.23281	5.39937	10.3054	9.21311	24.5622	6.39066	13.316	4.96108	24.3281	5.47738		1.85141	1.46713	1.74274	1.36888	1.63194	1.46543	1.74359	1.7034
4.11057	2.79102	2.72559	3.6953	5.49222	5.97457	6.49408	1.82187	10.598	1.34561	10.221	6.08213	5.84317	2.55926	5.92412	6.60275	5.56651	4.44877	3.04994	2.30422		13.1462	4.98632	9.02036	6.13825	14.4083	6.72798	36.6345	7.26264	13.4032	3.32269	7.69174	5.39478	10.092	9.20164	25.7967	6.39296	13.7084	4.97715	24.2157	5.47968		1.85481	1.47075	1.75911	1.38015	1.62365	1.46458	1.73104	1.73997
4.05346	2.81042	2.61083	3.6953	5.48335	5.87755	6.40925	1.83074	10.7244	1.34395	10.2764	6.08102	5.8343	2.55871	5.92467	6.71474	5.57538	4.45321	2.9823	2.29813		13.3711	4.98862	8.88039	6.14284	14.6171	6.74863	36.623	7.26723	13.5982	3.3617	8.12773	5.39707	9.91528	9.20623	26.4002	6.39755	13.7887	5.03451	24.1216	5.43149		1.85353	1.47245	1.76464	1.38866	1.64513	1.46415	1.72913	1.75677
4.04958	2.82207	2.58699	3.69585	5.48335	5.7711	6.36379	1.82852	10.8292	1.34616	10.3147	6.07604	5.81822	2.5637	5.91359	6.79347	5.58536	4.45931	2.94959	2.29646		14.227	4.97715	8.69911	6.14743	14.9314	6.79912	36.6115	7.25576	14.601	3.39153	8.29065	5.39019	9.77301	9.27507	26.7582	6.4182	13.8116	5.1263	24.0321	5.36036		1.85353	1.46926	1.76762	1.38866	1.64959	1.46415	1.72445	1.75188
4.04847	2.82262	2.58976	3.70084	5.47226	5.68294	6.36268	1.82797	10.8375	1.36113	10.2809	6.06384	5.80935	2.55372	5.90361	6.84004	5.61419	4.46208	2.93406	2.28926		15.6107	4.9519	8.51324	6.14743	14.9223	6.86107	36.6781	7.25117	15.1334	3.42136	8.29754	5.39707	9.58944	9.37833	27.1712	6.48016	13.9218	5.23644	23.961	5.23415		1.85885	1.46968	1.77017	1.38887	1.65491	1.46373	1.71084	1.7489
4.05014	2.82872	2.57479	3.7075	5.44232	5.62916	6.36434	1.8324	10.8303	1.36224	10.2415	6.05219	5.80824	2.53265	5.90416	6.87331	5.62972	4.45543	2.94016	2.28593		17.1183	4.97715	8.29065	6.14055	15.7185	6.89549	36.8525	7.25117	15.1976	3.47643	8.27459	5.39707	9.4357	9.43799	27.5774	6.57194	14.087	5.37412	23.9289	5.13318		1.85885	1.47138	1.76634	1.38909	1.65576	1.46139	1.71105	1.75996
4.03905	2.82872	2.54485	3.72136	5.40905	5.58758	6.36878	1.82519	10.8275	1.36169	10.2398	6.04998	5.80547	2.51935	5.90139	6.87054	5.52825	4.45099	2.92131	2.27151		18.2404	5.00698	8.0566	6.14513	17.8755	6.91844	36.9603	7.24887	16.0719	3.5315	8.32278	5.39478	9.30031	9.47241	27.8206	6.57194	14.1168	5.48886	23.938	5.10335		1.85864	1.47138	1.76741	1.38887	1.65555	1.4531	1.70892	1.77017
4.02574	2.82872	2.50659	3.73189	5.40184	5.53602	6.37876	1.79747	10.8347	1.36113	10.3269	6.04443	5.79882	2.50715	5.89917	6.8539	5.30593	4.46485	2.92408	2.23991		18.7658	5.05058	7.89138	6.14743	20.0554	6.94598	36.9947	7.24658	16.9875	3.60493	8.41457	5.3856	9.25442	9.50224	27.7219	6.45492	14.1512	5.55081	23.9518	5.09417		1.85545	1.47713	1.76741	1.38653	1.64662	1.45863	1.70956	1.77591
4.01853	2.82927	2.48442	3.733	5.40295	5.50497	6.38153	1.78084	10.8547	1.36612	10.3951	5.97402	5.7844	2.48331	5.92467	6.83838	5.21167	4.46984	2.9141	2.21385		18.9242	5.11024	7.76058	6.15202	21.4942	6.96663	37.0016	7.24887	17.646	3.68983	8.42833	5.35806	9.49765	9.5206	27.7954	6.39755	14.1535	5.61048	23.9518	5.09647		1.84907	1.48797	1.75869	1.37463	1.6379	1.4599	1.71084	1.77655
3.9398	2.8387	2.46446	3.73189	5.39907	5.49665	6.38541	1.78139	10.8564	1.37555	10.3629	5.8465	5.77054	2.45559	5.94131	6.82729	5.19615	4.46762	2.91355	2.18779		18.9356	5.16301	7.64815	6.16808	22.1069	6.97122	36.9649	7.25117	18.1164	3.76556	8.50865	5.31446	9.80743	9.52519	28.4103	6.3746	14.1926	5.68849	23.9518	5.10794		1.84737	1.49137	1.75358	1.37548	1.63492	1.46245	1.7287	1.78676
3.87882	2.85589	2.44228	3.73189	5.36581	5.46505	6.42533	1.78638	10.8741	1.37555	10.3058	5.76056	5.76444	2.44283	5.93687	6.81842	5.19338	4.45986	2.9141	2.1451		18.9402	5.18367	7.56783	6.19332	22.2836	6.97122	36.9144	7.25346	18.4079	3.84358	8.72435	5.27545	10.5486	9.52978	28.9657	6.33559	14.188	5.74586	23.9541	5.11483		1.85247	1.49201	1.75294	1.37548	1.6413	1.45692	1.73912	1.80122
3.88491	2.86975	2.4323	3.73023	5.29706	5.42957	6.46857	1.78971	11.0931	1.37389	10.2526	5.70955	5.77498	2.44172	5.94353	6.8162	5.19171	4.33123	2.91077	2.10019		18.9333	5.18367	7.48752	6.2025	22.2996	6.96433	36.8731	7.24658	18.557	3.93307	8.79548	5.24792	12.288	9.53437	29.358	6.2874	14.2545	5.77799	23.9518	5.11712		1.85056	1.48967	1.75422	1.37633	1.66256	1.45777	1.74167	1.80483
3.85775	2.89858	2.42731	3.73078	5.27876	5.43899	6.50738	1.79248	11.5161	1.37	10.2487	5.62084	5.78219	2.41788	6.00451	6.8162	5.17674	4.10336	2.91022	2.07358		18.9265	5.18367	7.40262	6.19332	22.357	6.9345	36.8433	7.21675	18.5891	4.01109	8.82761	5.22727	13.6717	9.53666	29.6586	6.26905	14.3761	5.78028	23.9518	5.11483		1.84077	1.48925	1.75486	1.37292	1.66639	1.45544	1.74933	1.79611
3.8023	2.95125	2.39515	3.72912	5.28264	5.44675	6.58445	1.79359	11.8604	1.38553	10.267	5.48168	5.73728	2.37519	6.08047	6.809	5.17508	3.97141	2.90689	2.04309		18.9769	5.18367	7.35213	6.17955	23.2863	6.90467	36.8272	7.1502	18.6603	4.11435	8.93775	5.22268	14.2063	9.54584	29.794	6.27823	14.4197	5.76651	23.9518	5.11712		1.84099	1.46756	1.75337	1.36995	1.66533	1.4548	1.75188	1.79888
3.8023	2.99006	2.34913	3.72967	5.24494	5.44675	6.68647	1.82409	12.1005	1.39884	10.2725	5.42014	5.69791	2.37686	6.09877	6.8101	5.18007	3.91042	2.89581	1.99208		19.7089	5.18137	7.33148	6.17267	25.9046	6.8932	36.8777	7.09972	19.6057	4.24285	9.01577	5.26169	14.5551	9.54813	29.8996	6.27823	14.5092	5.76881	23.9931	5.14466		1.84503	1.44969	1.76209	1.37207	1.6817	1.45437	1.74444	1.79654
3.7768	3.00669	2.34248	3.73245	5.18672	5.44842	6.76686	1.864	12.2818	1.40937	10.2653	5.41681	5.71787	2.36577	6.09877	6.80234	5.1834	3.87992	2.83094	1.97212		20.7874	5.17678	7.33607	6.17497	28.9611	6.8932	37.0337	7.08595	21.4139	4.35758	9.0456	5.33741	14.6905	9.54813	30.1451	6.26216	15.7323	5.75733	24.1927	5.20202		1.84737	1.44969	1.77145	1.36825	1.68915	1.45118	1.75465	1.79463
3.77791	2.99727	2.34137	3.733	5.1274	5.44343	6.83616	1.88452	12.3367	1.45372	10.2847	5.41626	5.75613	2.36244	6.0971	6.79403	5.18451	3.87493	2.64853	1.97212		21.5171	5.15843	7.34984	6.18185	30.7555	6.8932	37.3091	7.06071	22.5475	4.49068	9.08691	5.44067	14.6285	9.55043	30.3723	6.23692	17.926	5.7275	24.3258	5.27775		1.83737	1.45182	1.75784	1.35102	1.68915	1.44076	1.78187	1.78995
3.7452	2.98451	2.33971	3.71969	5.10356	5.45174	6.87109	1.89672	12.3367	1.48699	10.2953	5.38743	5.77941	2.35967	6.09544	6.79514	5.17175	3.87161	2.48164	1.97988		21.9279	5.12171	7.35672	6.18644	31.421	6.90008	37.5477	7.03317	22.9513	4.62836	9.09379	5.57376	14.9337	9.54584	30.4847	6.18873	19.4772	5.71833	24.3281	5.39019		1.83205	1.45225	1.76039	1.36314	1.69042	1.44161	1.75422	1.78633
3.72136	2.99449	2.34248	3.71526	5.10356	5.46727	6.87054	1.90503	12.3517	1.48422	10.2775	5.33088	5.78718	2.3131	6.11429	6.79569	5.13793	3.83557	2.41289	1.98709		22.0793	5.11024	7.36361	6.18644	31.5885	6.90238	37.5386	7.0653	23.2588	4.68572	9.09149	5.72521	16.2371	9.53437	30.6499	6.15661	19.966	5.71374	24.3212	5.49115		1.83588	1.45246	1.7555	1.3625	1.69361	1.43672	1.73976	1.77931
3.71858	3.00725	2.34248	3.71526	5.09857	5.46394	6.88163	1.89505	12.3572	1.48644	10.2481	5.28652	5.78551	2.19888	6.19191	6.79403	5.12518	3.80064	2.41899	1.95992		22.0862	5.124	7.38196	6.19791	31.5816	6.90238	37.5546	7.08595	23.6099	4.72014	9.09838	5.84224	18.6327	9.51142	30.9001	6.19562	20.0554	5.71144	24.3901	5.56917		1.8412	1.46224	1.75699	1.36973	1.69468	1.43906	1.73997	1.78378
3.72136	2.99228	2.34747	3.71692	5.08194	5.43677	6.88384	1.87398	12.3472	1.49032	10.1739	5.23385	5.78828	2.14288	6.34161	6.809	5.14181	3.789	2.4201	1.91224		22.0495	5.13318	7.38885	6.22545	31.5999	6.90238	37.5569	7.10201	23.8417	4.81422	9.52748	5.95468	20.932	9.48159	31.1066	6.26216	20.1587	5.71144	24.5415	5.66325		1.84439	1.46905	1.74061	1.36803	1.69191	1.43927	1.74082	1.78612
3.71692	2.98507	2.3508	3.71692	5.08194	5.42347	6.88551	1.87676	12.3472	1.48311	10.0275	5.15457	5.80935	2.12182	6.46636	6.83062	5.1457	3.77957	2.41511	1.90171		22.1734	5.12171	7.38196	6.23463	31.5954	6.90697	37.5638	7.12725	23.9151	4.92666	11.5812	6.04417	22.4694	9.50683	31.2925	6.29888	20.3239	5.72291	24.6081	5.73898		1.84226	1.46883	1.74997	1.35825	1.69383	1.44927	1.74231	1.78612
3.6709	2.9823	2.35911	3.72579	5.08471	5.43511	6.89715	1.87897	12.396	1.46703	9.85228	5.06974	5.83763	2.08467	6.51182	6.81953	5.13405	3.77791	2.36189	1.88951		23.0133	5.11483	7.34066	6.23463	31.6091	6.90467	37.6992	7.16167	23.9082	5.00468	14.1535	6.08547	23.3162	9.58485	31.4623	6.3333	20.3629	5.74586	24.6035	5.79634		1.84311	1.46415	1.75869	1.34868	1.69808	1.46203	1.74167	1.78591
3.62156	2.99006	2.38295	3.73411	5.0897	5.43844	6.91267	1.90337	12.5125	1.46703	9.6854	4.98879	5.86535	2.04253	6.51625	6.79735	5.1468	3.68144	2.3447	1.84349		24.3121	5.10794	7.29936	6.24381	31.6688	6.90467	37.8575	7.20527	23.9151	5.11253	15.9526	6.09465	23.6443	9.63304	31.5242	6.36542	20.3652	5.75045	24.5897	5.86289		1.8429	1.46415	1.76315	1.34974	1.69787	1.46203	1.74252	1.78527
3.63597	3.02887	2.40846	3.75629	5.07473	5.42347	6.916	1.90836	12.5879	1.46481	9.59336	4.87347	5.92634	2.02812	6.52069	6.80511	5.12352	3.49737	2.34803	1.79526		25.3401	5.11024	7.29477	6.25528	31.7835	6.90238	37.8828	7.25805	23.9357	5.24792	17.2491	6.09465	23.7568	9.65139	31.5219	6.3746	20.3721	5.72291	24.5828	5.92026		1.8429	1.47947	1.75656	1.35038	1.69787	1.44608	1.74593	1.78335
3.64928	3.02776	2.39848	3.76848	4.98713	5.39242	6.91378	1.90947	12.5745	1.46093	9.56952	4.75759	6.01726	2.03089	6.52568	6.82397	5.08138	3.37816	2.33306	1.79415		26.0445	5.11942	7.29936	6.26446	32.0245	6.90467	37.8552	7.2787	23.9197	5.34888	18.2082	6.09924	23.8164	9.64451	31.5219	6.36772	20.3721	5.67932	24.6838	5.95238		1.8429	1.47628	1.74359	1.36293	1.69744	1.45161	1.74805	1.7825
3.59273	3.02166	2.37353	3.76904	4.90951	5.38687	6.89438	1.89284	12.5928	1.482	9.58504	4.70603	6.07049	2.02146	6.5218	6.82729	5.06641	3.30331	2.29757	1.78694		26.4851	5.14236	7.27411	6.27364	32.3801	6.90926	37.8208	7.26723	23.9151	5.43838	18.6121	6.11071	23.8348	9.61927	31.5265	6.36772	20.4249	5.60359	24.7664	6.01204		1.84184	1.47628	1.7202	1.37144	1.69808	1.4633	1.74252	1.77804
3.48683	3.02166	2.36189	3.76848	4.92614	5.39408	6.90048	1.89062	12.6577	1.48533	9.58005	4.69051	6.12483	1.99485	6.5218	6.80955	5.04756	3.25785	2.28981	1.79193		26.6343	5.17908	7.23281	6.27364	32.6945	6.90467	37.791	7.26494	23.9082	5.50263	18.674	6.1153	23.8371	9.61697	31.5265	6.35624	20.5327	5.50033	24.833	6.08777		1.8412	1.49584	1.70999	1.37058	1.69893	1.485	1.74231	1.77825
3.44858	3.03164	2.34692	3.78456	4.83909	5.38466	6.90824	1.89284	12.747	1.48477	9.45808	4.67775	6.16585	1.97545	6.5279	6.7408	4.92503	3.23013	2.29036	1.79359		26.6434	5.18596	7.18692	6.27364	32.9102	6.90697	37.7657	7.27411	23.8807	5.55311	18.6763	6.11301	23.8394	9.61009	31.5242	6.38149	20.7599	5.41543	25.2965	6.11071		1.83397	1.50392	1.7202	1.37058	1.6934	1.50116	1.7404	1.7657
3.44913	3.00946	2.32917	3.79565	4.69605	5.37523	6.90269	1.87842	12.8229	1.49863	9.33278	4.67775	6.14589	1.91668	6.53344	6.66484	4.72821	3.2135	2.28593	1.79415		26.6457	5.18596	7.15938	6.27134	33.0387	6.91614	37.768	7.26723	23.8508	5.64031	18.6993	6.10154	23.8325	9.58944	31.5196	6.42967	21.1684	5.36036	25.6017	6.10383		1.82823	1.50137	1.72977	1.37292	1.67213	1.50094	1.73338	1.75784
3.39646	2.91798	2.33084	3.79621	4.56964	5.37468	6.90325	1.8446	12.8534	1.50584	9.31614	4.71656	6.12871	1.77308	6.53012	6.60219	4.69494	3.2135	2.28537	1.79526		26.6503	5.17908	7.15479	6.25757	33.0685	6.91614	37.8116	7.2351	23.86	5.75963	19.0963	6.06712	23.8279	9.60321	31.5196	6.45721	21.5929	5.30528	25.6889	6.09465		1.80505	1.50328	1.72849	1.38143	1.66937	1.50413	1.72424	1.76528
3.22957	2.8581	2.32917	3.79399	4.46042	5.35638	6.90491	1.83573	12.8556	1.5003	9.36549	4.75149	6.13869	1.66441	6.53732	6.55895	4.65114	3.21072	2.28593	1.78916		26.648	5.17678	7.15709	6.25987	33.0685	6.91614	37.8667	7.19839	24.6035	5.89043	19.9499	5.97303	23.8417	9.65369	31.5219	6.4618	22.0105	5.29152	25.7577	6.09924		1.79782	1.50265	1.72955	1.3876	1.67256	1.49924	1.72105	1.76166
3.19021	2.84036	2.29535	3.79011	4.40774	5.34973	6.90824	1.83573	12.8523	1.49697	9.46584	4.7648	6.14257	1.61285	6.53732	6.55396	4.55079	3.21017	2.27207	1.78528		26.6526	5.17908	7.15709	6.27364	33.0708	6.91156	37.9103	7.15709	25.8816	6.00975	20.4708	5.8606	23.86	9.68123	31.5357	6.48704	22.4763	5.30758	25.8036	6.10613		1.79292	1.49861	1.73359	1.37739	1.67256	1.51647	1.7102	1.76592
3.19464	2.83537	2.2449	3.78955	4.37448	5.35028	6.91933	1.8385	12.8568	1.49198	9.57118	4.77644	6.11651	1.54798	6.53566	6.54786	4.52085	3.20352	2.25433	1.78805		26.6664	5.18137	7.15709	6.30347	33.0754	6.90238	37.9126	7.12267	26.8546	6.12907	20.6796	5.79864	23.8669	9.68581	31.5334	6.52146	22.972	5.33741	25.8105	6.11301		1.77995	1.48904	1.73338	1.3725	1.66171	1.50498	1.70978	1.7657
3.18189	2.8387	2.22383	3.78512	4.35563	5.34695	6.91988	1.83129	12.8723	1.48366	9.66045	4.78254	6.03944	1.48754	6.54786	6.52069	4.52251	3.1891	2.25654	1.78805		26.6687	5.18137	7.15938	6.32641	33.0754	6.8909	37.9057	7.11578	27.5521	6.25298	20.8287	5.76881	23.8761	9.66975	31.5288	6.56047	23.5801	5.33741	26.056	6.12907		1.77038	1.48117	1.73529	1.35102	1.65321	1.49924	1.71041	1.76528
3.19076	2.83759	2.20886	3.78068	4.35785	5.35527	6.95592	1.78361	12.9133	1.48089	9.79296	4.77367	5.96958	1.46537	6.5401	6.47689	4.52584	3.12645	2.25821	1.78417		26.671	5.18367	7.16167	6.331	33.0869	6.85419	37.8919	7.11808	28.0203	6.35395	20.8953	5.74127	23.8898	9.6055	31.5196	6.58801	23.977	5.29381	26.4736	6.14513		1.75422	1.4733	1.74104	1.35634	1.65278	1.49967	1.71573	1.75826
3.19298	2.8387	2.195	3.78567	4.36062	5.36858	7.028	1.7509	12.9754	1.48422	9.94543	4.76535	5.95628	1.45705	6.40315	6.44418	4.52695	3.04162	2.2704	1.78583		26.6779	5.19743	7.16856	6.33559	33.0892	6.83124	37.8828	7.12037	28.3851	6.44115	20.9068	5.73209	23.9128	9.57338	31.5196	6.60636	23.9747	5.23185	26.5953	6.14284		1.73381	1.46692	1.75124	1.35464	1.65342	1.49924	1.7202	1.75273
3.19187	2.84147	2.19833	3.78955	4.36394	5.34695	7.14831	1.75145	13.0231	1.48477	10.0779	4.76425	5.96182	1.44596	6.22961	6.422	4.52085	3.01667	2.27539	1.79027		26.6848	5.19973	7.18003	6.33559	33.103	6.82895	37.9126	7.12267	28.8188	6.53523	20.9366	5.73439	23.9266	9.55961	31.5105	6.60866	24.2042	5.19055	26.5953	6.13596		1.73232	1.46267	1.75358	1.34124	1.65257	1.4901	1.6985	1.75635
3.18189	2.85145	2.19999	3.78789	4.36949	5.32201	7.28026	1.75811	13.078	1.4881	10.1977	4.76314	5.86812	1.42767	6.17084	6.38264	4.51253	3.01834	2.26431	1.79027		26.687	5.19743	7.18462	6.31953	33.2085	6.82665	37.9355	7.12725	28.9244	6.59719	20.9779	5.72521	23.938	9.54584	31.5403	6.61095	24.4727	5.17219	26.6113	6.14972		1.7489	1.45054	1.76103	1.33103	1.64853	1.48648	1.6917	1.75231
3.16581	2.83482	2.20387	3.78844	4.36228	5.32589	7.35955	1.76421	13.1212	1.48865	10.2931	4.76702	5.60809	1.39884	6.1592	6.36212	4.51309	3.02222	2.251	1.78694		26.6916	5.19514	7.18003	6.31035	33.3393	6.81977	38.0549	7.12955	29.1745	6.62702	20.9848	5.71144	24.1652	9.53437	31.7766	6.62013	24.7802	5.15154	26.6549	6.16808		1.75507	1.43821	1.77272	1.32805	1.63747	1.46671	1.69574	1.75167
3.1575	2.79933	2.20831	3.77902	4.34953	5.34474	7.41166	1.76199	13.1423	1.4881	10.2919	4.7842	5.39575	1.37056	6.15643	6.36101	4.50089	3.00392	2.24989	1.79137		26.6916	5.18826	7.17085	6.31035	33.4288	6.82206	38.3027	7.13643	30.6775	6.66144	21.0949	5.70456	24.6012	9.51601	32.153	6.61095	25.4594	5.14466	26.7903	6.15661		1.73763	1.43651	1.774	1.32359	1.63386	1.46224	1.6934	1.75465
3.15694	2.77549	2.21219	3.77126	4.35507	5.36969	7.45103	1.76587	13.1478	1.48976	10.2465	4.78531	5.31313	1.36169	6.15421	6.36101	4.49645	2.96788	2.24712	1.8202		26.6916	5.17908	7.16167	6.31494	33.5022	6.82665	38.3417	7.14332	32.1162	6.69356	21.1477	5.69767	24.9775	9.47241	32.6463	6.59489	26.4415	5.18367	26.9027	6.13825		1.71977	1.43587	1.76613	1.32954	1.6296	1.46224	1.69659	1.75762
3.13532	2.75609	2.21607	3.77126	4.37282	5.41293	7.45713	1.77252	13.1351	1.49253	10.2598	4.78531	5.28708	1.3628	6.13869	6.35713	4.48814	2.96733	2.2011	1.86511		26.7559	5.18596	7.15709	6.331	33.5619	6.83583	38.3463	7.13643	32.7404	6.71192	21.1454	5.69538	25.3355	9.38521	33.2567	6.5926	27.3158	5.20891	26.9945	6.13137		1.72232	1.43736	1.76379	1.33358	1.61854	1.46543	1.69723	1.7606
3.13144	2.73613	2.21718	3.77126	4.36672	5.45507	7.46378	1.78084	13.1168	1.49309	10.3197	4.78476	5.28098	1.38165	6.16086	6.35935	4.44489	2.9579	2.10962	1.91113		27.2034	5.20661	7.1502	6.3333	33.6055	6.86107	38.3899	7.12955	33.0823	6.73257	21.1546	5.69538	25.6866	9.27736	33.773	6.5926	27.816	5.20661	27.1781	6.11989		1.72317	1.43885	1.76677	1.33401	1.62067	1.46118	1.70276	1.76188
3.12922	2.71561	2.21607	3.77236	4.37282	5.48612	7.5098	1.78971	13.099	1.49309	10.4522	4.79917	5.28652	1.39218	6.17916	6.34715	4.44046	2.9579	2.10297	1.91113		28.1924	5.23415	7.14332	6.31265	33.6147	6.90238	38.484	7.12496	33.5848	6.75322	21.1775	5.69538	25.9849	9.20623	34.1241	6.59719	27.9399	5.21579	27.2355	6.11301		1.71084	1.438	1.77549	1.34719	1.61897	1.47691	1.72339	1.75911
3.10871	2.69843	2.21163	3.77292	4.37171	5.49665	7.58964	1.78306	13.0669	1.48588	10.5985	4.81137	5.29595	1.39218	6.19247	6.3161	4.43768	2.95125	2.10851	1.90614		29.521	5.27086	7.1502	6.28511	33.6606	6.93909	38.4771	7.12496	34.0782	6.76699	21.2143	5.69767	26.3681	9.16951	34.4247	6.59719	27.9422	5.21579	27.2676	6.13137		1.71807	1.438	1.77081	1.37335	1.61748	1.47755	1.73104	1.7555
3.1076	2.68734	2.21219	3.76848	4.39056	5.49111	7.64065	1.78306	13.0408	1.47978	10.7388	4.81414	5.28264	1.39052	6.19801	6.29226	4.4399	2.95125	2.10518	1.90559		30.8152	5.31676	7.17085	6.26675	34.1195	6.96663	38.3486	7.12267	34.186	6.77388	21.2464	5.69997	26.7674	9.1328	34.6197	6.59719	27.9445	5.22727	27.325	6.20021		1.71722	1.43545	1.77868	1.37463	1.60749	1.47819	1.73912	1.75528
3.10538	2.68734	2.21552	3.76405	4.44157	5.45285	7.64397	1.77696	13.0347	1.48145	10.8608	4.82911	5.26989	1.3944	6.20854	6.27508	4.43768	2.9457	2.11683	1.90337		31.9189	5.36036	7.20068	6.25757	34.7482	6.98957	38.2453	7.10201	34.1792	6.78076	21.3037	5.69767	26.85	9.09608	34.6794	6.60866	27.9445	5.29381	27.3433	6.25069		1.71488	1.43545	1.79016	1.36421	1.59366	1.48414	1.7555	1.75188
3.09984	2.67736	2.2011	3.7707	4.48315	5.4717	7.64231	1.78472	13.0231	1.48477	10.944	4.82579	5.26933	1.38497	6.21187	6.26066	4.39444	2.9324	2.11627	1.89173		32.8643	5.39019	7.21216	6.25298	34.9754	7.02629	38.2224	7.10431	34.2182	6.78076	21.5263	5.69997	26.8591	9.08232	34.7505	6.63619	27.9858	5.40395	27.5912	6.25298		1.71254	1.44246	1.78229	1.35591	1.55092	1.48138	1.76996	1.73529
2.99505	2.68179	2.19334	3.77735	4.51198	5.55099	7.64065	1.78749	13.012	1.46648	10.9406	4.81969	5.26878	1.38775	6.21243	6.25844	4.3706	2.93129	2.10352	1.89838		33.4403	5.40166	7.20527	6.25987	35.0144	7.07218	38.2935	7.14102	34.2801	6.77617	22.0541	5.69997	26.9532	9.08002	35.0557	6.63849	28.291	5.58294	28.0157	6.24381		1.71063	1.4599	1.78038	1.35378	1.54645	1.49903	1.79271	1.73381
2.83038	2.68734	2.21995	3.75462	4.56687	5.62195	7.63177	1.79027	13.0153	1.46093	10.9129	4.82579	5.26989	1.40272	6.20799	6.26066	4.3706	2.93129	2.10629	1.89006		33.5619	5.41084	7.18692	6.26446	35.0488	7.09742	38.4886	7.21445	34.3008	6.78076	22.692	5.69767	27.1781	9.07543	35.7441	6.58801	28.5687	5.76881	28.3851	6.23922		1.6985	1.46139	1.78059	1.35378	1.53901	1.50924	1.80653	1.73317
2.76551	2.68956	2.251	3.75185	4.61566	5.546	7.59352	1.79193	13.0098	1.46038	10.9124	4.83355	5.28153	1.40493	6.20633	6.26066	4.37171	2.92519	2.10906	1.89006		33.5665	5.42002	7.14791	6.25987	35.1085	7.11349	38.6285	7.26264	34.2847	6.77846	22.9743	5.69308	27.4925	9.06396	36.3935	6.53982	28.6054	5.87207	28.5733	6.23922		1.70084	1.45756	1.78973	1.38951	1.54114	1.51945	1.79675	1.71615
2.76108	2.70175	2.24656	3.75629	4.609	5.34307	7.5536	1.78583	12.9371	1.46038	10.9074	4.85295	5.28985	1.40438	6.20522	6.25401	4.37226	2.91466	2.10851	1.90226		33.8028	5.42231	7.12267	6.26216	35.175	7.13643	38.6951	7.26723	34.31	6.77617	23.0133	5.68161	27.7724	9.06625	36.5289	6.53752	28.5916	5.95238	28.6788	6.24381		1.67213	1.46224	1.79654	1.42417	1.52753	1.52965	1.7925	1.69914
2.64187	2.72781	2.23326	3.75296	4.64172	5.30149	7.55138	1.78472	12.8484	1.45982	10.9002	5.00653	5.30205	1.40493	6.17861	6.17306	4.36062	2.91743	2.10574	1.90337		34.6174	5.44755	7.11119	6.27134	35.2508	7.15709	38.6515	7.26723	34.4752	6.77846	23.0247	5.67014	28.1373	9.06166	36.5633	6.53523	28.5733	6.01893	28.7568	6.26446		1.65108	1.46224	1.80164	1.42269	1.51583	1.52902	1.80313	1.6951
2.55095	2.76607	2.23326	3.75351	4.64282	5.30149	7.60128	1.78306	12.8329	1.46204	10.9063	5.21611	5.31868	1.40493	6.15199	5.97956	4.36228	2.90745	2.07025	1.90115		35.8772	5.46591	7.04465	6.25528	35.3035	7.15709	38.5069	7.27182	34.8584	6.78076	23.027	5.67473	28.6398	9.02495	36.6804	6.52835	28.5893	6.04417	28.7913	6.27134		1.64747	1.46267	1.80079	1.42141	1.51881	1.52859	1.7959	1.69106
2.54596	2.81652	2.22328	3.75462	4.63894	5.30149	7.72825	1.78638	12.8423	1.4637	10.9312	5.31646	5.33254	1.4066	6.15587	5.86757	4.38002	2.9019	2.06194	1.90503		36.9167	5.45903	6.92991	6.22315	35.315	7.1502	38.3417	7.281	35.2255	6.77158	23.0385	5.6862	29.0804	8.98365	36.6895	6.52376	28.8073	6.05564	28.7981	6.25987		1.6447	1.475	1.79037	1.41971	1.522	1.52816	1.77187	1.69319
2.54596	2.86587	2.21995	3.75629	4.63894	5.29872	7.83636	1.80523	12.8407	1.46426	10.9739	5.33587	5.33864	1.41381	6.16142	5.83763	4.38224	2.9019	2.05917	1.90503		37.5454	5.45444	6.82206	6.2025	35.3173	7.13184	38.2706	7.29706	35.3793	6.76929	23.0592	5.67702	29.3971	8.96758	36.6895	6.52146	29.1584	6.07629	28.8119	6.24381		1.64449	1.48733	1.78931	1.42035	1.50754	1.52583	1.75826	1.69319
2.54097	2.89691	2.22272	3.75629	4.63783	5.31535	7.88016	1.82298	12.8207	1.46758	11.0155	5.33919	5.33143	1.41048	6.17472	5.82044	4.37891	2.89636	2.06027	1.90503		37.947	5.45903	6.72569	6.19562	35.354	7.12037	38.2247	7.30394	35.4252	6.78305	23.0569	5.68849	29.6403	8.9607	36.7056	6.52146	29.5646	6.09695	28.8716	6.22086		1.64428	1.48691	1.79633	1.42056	1.485	1.51392	1.75571	1.68404
2.54374	2.89858	2.23658	3.75629	4.63783	5.34529	7.90067	1.81632	12.7869	1.46648	11.0316	5.33975	5.29151	1.41048	6.19912	5.81212	4.38169	2.86032	2.08633	1.9006		38.1581	5.45444	6.68438	6.19562	35.4917	7.12267	38.1994	7.26723	35.4389	6.806	23.0569	5.71374	29.8468	8.96529	36.7308	6.51917	30.5146	6.09924	28.9152	6.20939		1.63832	1.49882	1.7942	1.41822	1.46756	1.51817	1.75316	1.68128
2.53321	2.91022	2.24767	3.75462	4.64504	5.3525	7.92341	1.79803	12.7863	1.47147	11.0537	5.3403	5.23441	1.41602	6.21021	5.80104	4.38446	2.86088	2.13512	1.9067		38.1902	5.43608	6.64996	6.19562	35.6661	7.12037	38.243	7.20527	35.4527	6.83813	23.0569	5.67014	29.9363	9.05937	36.7698	6.51687	31.6688	6.1153	28.8899	6.2048		1.62705	1.51796	1.79697	1.41801	1.45777	1.51817	1.75209	1.68298
2.5138	2.9263	2.24767	3.7524	4.64393	5.35749	7.92784	1.79803	12.8019	1.4759	11.0787	5.3464	5.21722	1.43654	6.20688	5.73229	4.37559	2.85589	2.14011	1.90503		38.1742	5.41313	6.60407	6.19562	35.8657	7.11349	38.2453	7.14102	35.4642	6.86566	23.1074	5.599	29.9868	9.15575	36.8938	6.52376	31.8478	6.14972	28.8211	6.17038		1.62705	1.51562	1.80164	1.41375	1.45522	1.51158	1.74146	1.68298
2.50881	2.9263	2.2449	3.75019	4.65502	5.36414	7.93172	1.79803	12.8013	1.47147	11.0571	5.34862	5.23163	1.43321	6.20411	5.71122	4.37392	2.87418	2.15065	1.91058		38.1535	5.36265	6.5031	6.19332	36.1021	7.12496	38.2591	7.10201	35.4527	6.89549	23.1968	5.53246	30.7578	9.20623	37.059	6.52835	31.8661	6.17267	28.7477	6.1589		1.63811	1.51583	1.80505	1.41865	1.45522	1.47755	1.72466	1.68341
2.50881	2.92408	2.26042	3.75185	4.66888	5.36303	7.95889	1.78805	12.8035	1.47147	10.9706	5.34973	5.26434	1.42545	6.16973	5.70512	4.33511	2.81042	2.15619	1.91002		38.1329	5.30299	6.40673	6.19562	36.2283	7.15938	38.2866	7.09283	35.4871	6.95056	23.2542	5.44985	31.9327	9.23376	37.2334	6.53293	31.9396	6.18873	28.6628	6.16579		1.65214	1.51413	1.80186	1.42098	1.45416	1.44693	1.71786	1.69446
2.50937	2.90412	2.251	3.74741	4.64948	5.34917	7.92341	1.79692	12.7941	1.47257	10.8719	5.35305	5.30371	1.42545	6.12094	5.70789	4.14827	2.75941	2.15675	1.91058		38.1168	5.27086	6.41591	6.2048	36.2283	7.18462	38.3073	7.08825	35.556	7.0217	23.2955	5.38101	32.9653	9.25671	37.7015	6.53752	32.0015	6.23233	28.5687	6.17726		1.66937	1.51689	1.80058	1.42524	1.44927	1.41737	1.71701	1.69531
2.49883	2.88139	2.21385	3.73245	4.64338	5.34197	7.86575	1.79914	12.7719	1.47812	10.9223	5.35583	5.32201	1.42545	6.11152	5.70623	3.93038	2.74722	2.14954	1.90448		38.1191	5.25939	6.50999	6.19562	36.2765	7.19839	38.3761	7.08825	35.5904	7.07677	23.3575	5.36265	34.1998	9.28654	38.5918	6.53982	32.1644	6.28052	28.509	6.19791		1.67447	1.50605	1.80016	1.41716	1.45033	1.4044	1.71701	1.69574
2.44671	2.87141	2.19888	3.73078	4.65336	5.33587	7.84301	1.79858	12.7531	1.47479	11.1524	5.38133	5.33032	1.42545	6.12094	5.61696	3.88381	2.74666	2.15453	1.89561		38.1214	5.26627	6.62702	6.16808	36.304	7.20068	38.5046	7.09513	35.6202	7.11808	23.4539	5.34659	35.8267	9.33244	39.232	6.54211	32.3297	6.30576	28.5756	6.21856		1.67043	1.50158	1.79441	1.4129	1.45182	1.39759	1.71701	1.69319
2.39903	2.86587	2.18114	3.73245	4.64449	5.32367	7.77981	1.79914	12.7692	1.45816	11.6631	5.40295	5.3281	1.42434	6.12427	5.33531	3.896	2.74888	2.15453	1.89616		38.1145	5.27775	6.73028	6.11301	36.3063	7.20298	38.6148	7.09283	35.6684	7.14102	23.6558	5.33053	37.4445	9.37603	39.4133	6.5467	32.3985	6.31494	28.7064	6.24381		1.65278	1.49839	1.7908	1.41865	1.47394	1.41375	1.71063	1.69234
2.39903	2.87806	2.16063	3.73189	4.6528	5.32533	7.67502	1.79581	12.8063	1.45539	12.4066	5.41404	5.32533	1.41491	6.12815	5.13572	3.84278	2.75054	2.13845	1.89561		38.1053	5.28004	6.97581	6.0304	36.3155	7.20298	38.7318	7.08595	35.7281	7.14102	23.9885	5.31905	38.3761	9.41275	39.4156	6.55359	32.4513	6.2897	28.7545	6.2874		1.63534	1.50413	1.79059	1.42098	1.49095	1.43736	1.69531	1.69319
2.40569	2.88638	2.17781	3.733	4.67055	5.33642	7.60461	1.79581	12.8107	1.46204	12.9554	5.41792	5.33642	1.41436	6.12926	4.97105	3.76793	2.75165	2.12071	1.89006		38.1008	5.25939	7.45539	5.99828	36.3752	7.20298	38.8832	7.09283	35.7992	7.12725	24.1377	5.29611	38.4656	9.44717	39.5005	6.56735	32.5339	6.23004	28.7568	6.31494		1.63939	1.51051	1.79059	1.41843	1.49244	1.43927	1.6749	1.69319
2.40458	2.9008	2.2704	3.73245	4.66888	5.34973	7.6229	1.8069	12.8069	1.46149	13.0652	5.41848	5.36137	1.4066	6.14423	4.77977	3.74797	2.74555	2.10796	1.88507		38.1076	5.23415	7.80189	5.99598	36.4348	7.20298	38.8947	7.13184	35.8428	7.09972	24.1377	5.27545	38.7157	9.48388	39.7369	6.58571	32.6394	6.18185	28.7568	6.34248		1.64258	1.51051	1.78591	1.40929	1.49095	1.43927	1.6749	1.6934
2.40513	2.92075	2.38684	3.73411	4.6212	5.38355	7.6473	1.83906	12.8024	1.46758	13.1506	5.4279	5.38133	1.40771	6.14589	4.64449	3.74908	2.73447	2.10019	1.87454		38.1673	5.24333	7.86843	5.98221	36.4532	7.18921	38.6652	7.17315	35.8451	7.07448	24.2776	5.26857	39.8195	9.50454	39.964	6.60177	32.7243	6.15431	28.7729	6.38378		1.64428	1.50945	1.78378	1.40759	1.48691	1.44821	1.67341	1.69319
2.41012	2.91798	2.45226	3.74464	4.60401	5.39741	7.62956	1.86622	12.7764	1.46537	13.7799	5.43677	5.4024	1.40771	6.147	4.59625	3.72912	2.72837	2.09077	1.86844		38.2224	5.26398	7.8386	5.96386	36.4578	7.18233	38.3601	7.19609	35.9919	7.05612	24.5415	5.26398	41.389	9.50454	40.1774	6.60407	32.7771	6.13596	28.8808	6.44115		1.64704	1.50839	1.78399	1.4078	1.48691	1.43949	1.69893	1.69149
2.39293	2.92297	2.47554	3.75739	4.60401	5.39519	7.63566	1.8701	12.7819	1.45761	14.2578	5.45451	5.42236	1.40771	6.13092	4.57352	3.7075	2.71839	2.08522	1.87066		38.2407	5.27316	7.85467	5.95697	36.4578	7.18233	37.9424	7.21675	36.0998	7.05153	24.7366	5.2548	43.0779	9.55272	40.3472	6.60407	32.8299	6.12678	28.9244	6.49163		1.63768	1.512	1.78165	1.40333	1.48691	1.44268	1.73636	1.68957
2.34414	2.92852	2.50881	3.75407	4.60679	5.39353	7.61237	1.87066	12.7919	1.47036	14.2988	5.49554	5.39519	1.40771	6.12871	4.53693	3.70029	2.71617	2.09409	1.87066		38.243	5.27086	7.83401	5.9432	36.4715	7.18233	37.3481	7.24887	36.1021	7.05612	24.8215	5.2571	44.8861	9.63533	40.4046	6.60177	32.9171	6.13366	28.8899	6.5467		1.62663	1.512	1.79037	1.39908	1.48691	1.45331	1.74295	1.69042
2.32308	2.92852	2.55649	3.74076	4.59958	5.36636	7.53752	1.87842	12.7991	1.47368	14.2994	5.5521	5.32921	1.41879	6.0838	4.48703	3.70971	2.70952	2.12403	1.86345		38.243	5.27086	7.80877	5.92714	36.4876	7.18003	36.8226	7.27641	36.0906	7.05841	24.9385	5.26627	46.6874	9.68811	40.4459	6.61325	32.9836	6.16349	28.8509	6.62013		1.62982	1.50817	1.77506	1.40206	1.48542	1.47564	1.73933	1.69212
2.30866	2.92852	2.5637	3.7208	4.57962	5.33975	7.42109	1.89284	12.8063	1.46315	14.2905	5.6092	5.27155	1.42046	5.94297	4.44988	3.68421	2.70674	2.15785	1.86179		38.2499	5.24792	7.76517	5.92255	36.4899	7.20757	36.3797	7.26723	36.0769	7.05612	25.129	5.27545	48.0092	9.6927	40.5285	6.63161	32.9951	6.19791	28.7981	6.69586		1.63641	1.50796	1.79144	1.40142	1.48308	1.52583	1.74742	1.68298
2.31531	2.92852	2.56204	3.68366	4.57407	5.3026	7.32517	1.91279	12.803	1.47202	14.26	5.63415	5.16344	1.42545	5.86757	4.43269	3.62378	2.70453	2.17671	1.86955		38.2797	5.1676	7.71928	5.91567	36.4899	7.24199	36.0172	7.2351	36.0677	7.05383	25.207	5.29611	48.6907	9.67664	40.5538	6.6339	32.9951	6.23233	28.7477	6.7647		1.63641	1.50477	1.79718	1.39951	1.49627	1.58835	1.74167	1.66937
2.34026	2.94016	2.57257	3.66148	4.57407	5.25381	7.3163	1.92832	12.8124	1.51028	14.2345	5.63471	5.03647	1.47812	5.85759	4.40664	3.59883	2.70508	2.20221	1.8945		38.3325	5.08729	7.85467	5.90878	36.4945	7.2787	36.008	7.17315	36.0562	7.05612	25.2093	5.30528	49.0165	9.66516	40.5262	6.63161	32.9974	6.24151	28.7018	6.81747		1.63449	1.50307	1.78229	1.39504	1.51115	1.60727	1.74444	1.67213
2.3447	2.95402	2.56758	3.66037	4.56909	5.24161	7.32462	1.93941	12.8473	1.53356	14.2351	5.6336	5.00154	1.52303	5.86202	4.3706	3.61657	2.70563	2.23492	1.91224		38.3463	5.01386	8.10479	5.90878	36.5197	7.32919	35.8566	7.09283	36.0585	7.063	25.2139	5.30069	49.223	9.62156	40.501	6.64078	32.9974	6.24381	28.649	6.86107		1.62471	1.48329	1.76741	1.39504	1.51158	1.606	1.75486	1.67299
2.33583	2.95568	2.57313	3.66037	4.56798	5.24217	7.32018	1.94828	12.8656	1.54909	14.2306	5.62805	5.00321	1.52857	5.87422	4.33899	3.61657	2.70064	2.25044	1.92555		38.3463	4.93814	8.19428	5.9019	36.561	7.35902	35.2737	7.00564	36.288	7.06759	25.2575	5.30758	49.386	9.54125	40.4734	6.66144	33.0112	6.24381	28.6008	6.92762		1.61897	1.48074	1.7657	1.39547	1.51051	1.6026	1.73678	1.67426
2.32141	2.9762	2.58809	3.64928	4.56909	5.24328	7.31076	1.94994	12.8673	1.56018	14.2578	5.61475	5.02317	1.538	5.87644	4.34343	3.61546	2.69843	2.25488	1.94107		38.344	4.90601	8.18739	5.90419	36.623	7.37049	34.7964	6.94598	36.6987	7.07448	25.2873	5.34659	49.503	9.48159	40.4482	6.66603	33.0135	6.23463	28.5618	7.0194		1.60898	1.48117	1.76762	1.39547	1.50647	1.66937	1.70382	1.67469
2.29036	2.99505	2.60251	3.64096	4.57574	5.24217	7.30022	1.94551	12.8601	1.56018	14.3443	5.59756	5.05588	1.55851	5.84594	4.34066	3.61158	2.69621	2.24934	1.94717		38.3463	4.9129	8.24476	5.92026	36.7767	7.40262	34.1837	6.92762	36.9534	7.08366	25.3011	5.3856	49.5718	9.4357	40.4367	6.64767	33.1397	6.24839	28.532	7.11119		1.6111	1.47947	1.76762	1.39589	1.51051	1.71445	1.70722	1.67596
2.26819	3.02222	2.59198	3.63819	4.58572	5.24106	7.28581	1.94329	12.8351	1.5574	14.4069	5.57594	5.07029	1.56184	5.81601	4.33733	3.59661	2.68956	2.24435	1.9444		38.3784	4.92666	8.37785	5.9455	37.0544	7.46457	33.3026	6.85419	37.0567	7.08595	25.3171	5.41313	49.6062	9.40128	40.4734	6.64078	33.3944	6.26216	28.5411	7.22134		1.61663	1.47479	1.7791	1.38632	1.51498	1.71445	1.70956	1.67639
2.30367	3.05881	2.58089	3.6332	4.57075	5.24438	7.25587	1.94052	12.8091	1.55685	14.4119	5.55265	5.06586	1.56517	5.80214	4.34565	3.58386	2.68179	2.24767	1.94551		38.3991	4.94043	8.37785	5.96615	37.293	7.53112	32.4857	6.73487	37.0888	7.08366	25.3424	5.41772	49.6223	9.41734	40.6226	6.63619	33.6583	6.25069	28.571	7.32689		1.61238	1.47734	1.79165	1.38292	1.512	1.71722	1.70595	1.6783
2.31587	3.07877	2.57922	3.64152	4.54303	5.24383	7.21373	1.92721	12.8362	1.5502	14.4147	5.53158	5.06697	1.57071	5.8221	4.3523	3.57831	2.68179	2.27262	1.94606		38.4312	4.96108	8.3985	5.97303	37.4514	7.59537	31.9028	6.69356	37.114	7.08136	25.3676	5.41772	49.6269	9.4334	40.7052	6.61325	33.8992	6.27134	28.5687	7.41409		1.60132	1.46564	1.79569	1.38526	1.50903	1.72083	1.7102	1.6783
2.3386	3.08043	2.64409	3.64595	4.5397	5.23496	7.18656	1.91668	12.8651	1.54909	14.4269	5.50663	5.06641	1.57237	5.80935	4.39777	3.58219	2.68346	2.31143	1.94495		38.5436	4.98174	8.46964	5.97303	37.5477	7.64815	31.5724	6.6775	37.1737	7.08136	25.3974	5.41772	49.6246	9.42881	40.6914	6.5903	33.9726	6.32871	28.7981	7.54489		1.59515	1.41248	1.7993	1.37186	1.50966	1.72764	1.74316	1.6783
2.3824	3.07988	2.70619	3.64595	4.54081	5.22886	7.18546	1.91668	12.8518	1.54909	14.4535	5.48834	5.07085	1.5757	5.5155	4.49479	3.59994	2.68568	2.27373	1.9638		38.6079	4.98632	8.51783	5.97303	37.5523	7.67339	31.4806	6.62013	37.2425	7.08136	25.4296	5.41772	49.6246	9.40586	40.6754	6.57194	33.9726	6.3769	29.1928	7.7537		1.59515	1.37505	1.80505	1.36229	1.50966	1.74784	1.78654	1.67618
2.40347	3.07655	2.77605	3.64651	4.5214	5.23108	7.16716	1.91723	12.8434	1.56239	14.5018	5.49665	5.07085	1.58069	5.26823	4.53083	3.621	2.67902	2.26874	1.98543		38.6102	4.99091	8.56831	5.97303	37.5661	7.69404	31.4554	6.58571	37.3596	7.08595	25.4365	5.41772	49.6338	9.38521	40.6983	6.53982	33.9726	6.40902	29.5118	7.93498		1.60238	1.37782	1.80547	1.3523	1.5069	1.75146	1.81696	1.67618
2.34026	3.0699	2.89802	3.6576	4.4643	5.22664	7.10728	1.90836	12.844	1.58734	14.5966	5.44509	5.05643	1.5818	5.26823	4.56299	3.62378	2.68346	2.26098	1.94828		38.6079	5.00698	8.59814	5.97074	37.5684	7.71469	31.4347	6.56965	37.5133	7.10431	25.4342	5.42002	49.6338	9.37374	40.7832	6.50769	33.9726	6.42738	29.6977	8.05889		1.58452	1.38632	1.80505	1.34166	1.50669	1.74954	1.84545	1.67405
2.26763	3.04328	3.02222	3.65427	4.38446	5.2272	7.06958	1.88729	12.869	1.60619	14.7629	5.35915	5.05255	1.57681	5.10356	4.63118	3.60437	2.7012	2.23492	1.93941		38.5964	5.00927	8.59355	5.95927	37.5753	7.71928	31.4324	6.4618	37.5867	7.11119	25.464	5.42461	49.6315	9.35079	40.9645	6.48475	34.0346	6.43885	29.7481	8.13003		1.56198	1.38015	1.80845	1.3523	1.50775	1.7455	1.84758	1.67086
2.2765	3.01224	3.14197	3.65039	4.3268	5.22387	7.06625	1.88452	12.8845	1.64722	14.9276	5.28874	5.04922	1.57681	4.91394	4.63063	3.58607	2.74112	2.23437	1.94495		38.5941	5.00239	8.67386	5.93632	37.6969	7.7101	31.4508	6.27364	37.6258	7.11119	25.4778	5.44067	49.6315	9.33014	41.155	6.45492	34.17	6.44574	29.7275	8.1438		1.56198	1.36825	1.8042	1.37399	1.5069	1.75103	1.86587	1.66299
2.31642	3.01224	3.3205	3.64928	4.32347	5.21888	7.03798	1.87897	12.8861	1.66164	15.0346	5.21278	5.0459	1.57237	4.82634	4.76425	3.58607	2.77272	2.23437	1.94551		38.6148	5.00009	8.72664	5.90878	37.8667	7.69633	31.4646	6.1589	37.6854	7.11119	25.4709	5.44067	49.6361	9.30719	41.1963	6.41132	34.2159	6.46868	29.6609	8.15068		1.56325	1.35974	1.78612	1.391	1.51774	1.7489	1.87012	1.65555
2.38462	3.01168	3.45246	3.64817	4.30906	5.21611	7.04186	1.87509	12.9061	1.63059	15.0739	5.16344	5.04756	1.56738	4.76591	4.91173	3.54117	2.78436	2.23714	1.94495		38.7226	5.00009	8.77483	5.90419	37.8942	7.6688	31.3498	6.09695	37.7038	7.1089	25.4594	5.4269	49.6338	9.2636	41.1618	6.34018	34.2067	6.48934	29.599	8.17822		1.56198	1.37654	1.78144	1.4078	1.53114	1.7455	1.87522	1.65767
2.51103	3.01335	3.47741	3.64817	4.29298	5.21611	7.07512	1.88064	12.8961	1.62504	15.0717	5.159	5.05089	1.58734	4.74539	4.92947	3.53285	2.78714	2.23492	1.9383		38.9681	5.00009	9.01577	5.90649	37.8805	7.64585	31.0768	6.09695	37.6923	7.11578	25.4548	5.43149	49.6338	9.2177	41.1114	6.25298	34.2457	6.50769	29.5806	8.19657		1.56134	1.38164	1.77868	1.42056	1.52604	1.74784	1.87544	1.66873
2.58532	3.01501	3.47519	3.66314	4.28854	5.22054	7.09176	1.87897	12.8751	1.62061	15.0728	5.16676	5.10689	1.60786	4.74817	4.93612	3.53396	2.78381	2.23381	1.93885		39.1999	5.00239	9.39898	5.90419	37.8575	7.63897	30.6706	6.17955	37.7543	7.12496	25.4479	5.44067	49.6361	9.20393	41.0058	6.17267	34.3329	6.52146	29.5393	8.20346		1.56049	1.381	1.77676	1.4195	1.50137	1.7657	1.87565	1.6715
2.57867	3.01556	3.47131	3.68366	4.27025	5.24217	7.11726	1.85791	12.8917	1.61895	15.0811	5.17286	5.1967	1.60564	4.73708	4.95164	3.55891	2.77272	2.23548	1.92832		39.3491	4.98403	9.55502	5.90878	37.8575	7.6229	30.09	6.25528	38.1099	7.13414	25.4525	5.44755	49.6361	9.16951	40.8957	6.11301	34.3811	6.52376	29.5072	8.21722		1.56176	1.38143	1.77634	1.42354	1.49988	1.7706	1.87756	1.66746
2.57645	3.01168	3.51511	3.67977	4.25417	5.26213	7.18102	1.85458	12.9859	1.60841	15.1188	5.17508	5.25658	1.59566	4.73819	4.95497	3.57111	2.76829	2.23326	1.92776		39.3835	4.98403	9.58026	5.92944	37.8415	7.58389	29.537	6.32182	38.8741	7.14332	25.4479	5.45673	49.6407	9.10985	40.8612	6.05105	34.3811	6.52605	29.6036	8.2287		1.56814	1.38526	1.77719	1.41694	1.50201	1.77208	1.87671	1.66958
2.58366	3.00669	3.65981	3.65094	4.25583	5.35472	7.26529	1.8629	13.0697	1.60897	15.156	5.17785	5.28209	1.59067	4.7526	4.95386	3.57111	2.77106	2.24047	1.90947		39.3536	4.98862	9.6078	5.92714	37.8162	7.53571	29.6013	6.39984	39.4936	7.14791	25.6177	5.4705	49.6498	9.07543	40.8544	6.02122	34.3926	6.53523	29.7252	8.24476		1.59026	1.38526	1.7874	1.41503	1.48925	1.77272	1.87607	1.68
2.61083	3.00614	3.76571	3.61102	4.23698	5.44842	7.31519	1.84848	13.0802	1.62172	15.1499	5.17563	5.28763	1.59899	4.76258	4.93612	3.58275	2.77161	2.23548	1.90226		39.3513	5.00009	9.67205	5.92255	37.8002	7.48293	30.588	6.46868	39.7506	7.14791	26.017	5.47738	49.7003	9.05019	40.9094	6.06712	34.4362	6.56277	29.7436	8.29754		1.60536	1.38632	1.79059	1.41546	1.47606	1.77251	1.895	1.6732
2.64465	2.99061	3.80119	3.59384	4.20371	5.43677	7.31963	1.84183	13.0802	1.64778	15.2175	5.17286	5.27155	1.58124	4.76369	4.90618	3.57166	2.77217	2.21829	1.90282		39.3605	5.00239	9.69499	5.92485	37.7749	7.42556	32.371	6.54211	39.8539	7.1525	26.3796	5.47968	49.9826	8.99971	41.1022	6.12219	34.4981	6.61095	29.7619	8.38703		1.6128	1.38526	1.77719	1.41673	1.47606	1.77293	1.9118	1.65533
2.69288	2.99616	3.8084	3.60992	4.18431	5.36192	7.32351	1.84626	13.0758	1.66718	15.3251	5.16787	5.22276	1.59122	4.77423	4.91283	3.58386	2.77383	2.21773	1.90503		39.3628	5.00009	9.76383	5.92485	37.7382	7.36361	34.7804	6.64308	39.8791	7.15709	26.5861	5.50033	50.4323	8.94234	41.3225	6.14972	34.544	6.62013	29.8514	8.45817		1.61216	1.37526	1.77464	1.41843	1.46394	1.77293	1.90819	1.653
2.74943	2.99505	3.81007	3.61102	4.17322	5.30704	7.36786	1.86068	13.063	1.66884	15.3639	5.15401	5.20114	1.60453	4.76535	4.92281	3.57942	2.78436	2.21884	1.90392		39.3468	5.00239	10.2595	5.92714	37.7221	7.29477	37.2127	6.72339	39.8837	7.15479	26.6389	5.53475	50.7559	8.89645	41.4969	6.19103	34.5876	6.61554	29.8835	8.53389		1.62811	1.35421	1.78038	1.41609	1.46628	1.77081	1.91754	1.6564
2.78547	2.98507	3.81062	3.58275	4.08895	5.26213	7.5475	1.86511	13.0575	1.66829	15.3645	5.14736	5.19726	1.61451	4.85129	4.92281	3.53784	2.80155	2.22383	1.89672		39.3445	5.00239	10.7551	5.92714	37.7451	7.21675	38.7272	6.79682	40.0191	7.15479	26.6572	5.54164	50.9119	8.84138	41.6024	6.23692	34.6266	6.61325	29.8858	8.63715		1.63683	1.35421	1.79314	1.4078	1.47521	1.77953	1.91988	1.65023
2.7949	2.99671	3.81339	3.49903	3.98305	5.23718	7.89846	1.85236	13.0924	1.66108	15.4598	5.14403	5.17508	1.63447	5.03647	4.9278	3.52065	2.82816	2.22771	1.87509		39.4936	5.00009	11.0649	5.94779	37.9103	7.13873	39.0462	6.89779	40.205	7.15479	26.7284	5.53934	50.9555	8.77942	41.646	6.25298	34.6174	6.60866	29.8904	8.74041		1.63662	1.36633	1.79888	1.39759	1.48478	1.79611	1.91818	1.64087
2.79933	2.9956	3.81894	3.41919	3.95921	5.25825	8.17955	1.82187	13.2637	1.64112	15.7537	5.14237	5.1468	1.65443	5.12684	4.9206	3.56612	2.83205	2.23825	1.85458		39.7827	4.9978	11.2714	5.96844	38.1375	7.08136	38.9062	6.9804	40.2807	7.1525	26.7674	5.51639	50.9876	8.71976	41.6391	6.25987	34.6587	6.60636	29.8881	8.86432		1.63045	1.37824	1.79973	1.39993	1.48797	1.79611	1.93689	1.64258
2.79933	2.97176	3.82005	3.41475	3.94812	5.2649	8.31983	1.80912	13.6141	1.63613	16.0237	5.14459	5.1335	1.66385	5.15678	4.89177	3.61102	2.83149	2.2327	1.85181		39.8745	5.01386	11.2806	5.9891	38.2729	7.02858	38.757	7.05383	40.3404	7.15479	26.8018	5.49345	51.0221	8.69681	41.5565	6.27364	34.7322	6.61095	29.8996	9.03642		1.61684	1.37824	1.79739	1.40844	1.48563	1.79697	1.97432	1.64024
2.80599	2.95846	3.81949	3.40533	3.85996	5.25935	8.3786	1.80579	13.959	1.6389	16.0885	5.14403	5.13461	1.67051	5.19282	4.88567	3.62433	2.82428	2.22882	1.84405		39.8722	5.03222	11.3288	6.01893	38.3784	6.96204	38.9613	7.15479	40.5125	7.1525	26.9005	5.49115	51.0175	8.69222	41.5152	6.2874	34.7345	6.62243	29.957	9.21082		1.61472	1.38249	1.79888	1.40844	1.4952	1.79122	1.98113	1.64002
2.84535	2.95236	3.82781	3.40089	3.845	5.24882	8.40521	1.80468	14.1358	1.6389	16.0841	5.14237	5.15013	1.68104	5.23108	4.88511	3.63819	2.82428	2.24379	1.84183		39.8654	5.03451	11.3678	6.06941	38.4036	6.90467	40.1292	7.27411	40.7236	7.1502	26.9005	5.47968	51.1024	8.66698	41.5634	6.29199	34.6817	6.62472	30.269	9.33244		1.5943	1.38249	1.80143	1.40674	1.49478	1.79122	1.97517	1.64002
2.95735	2.94182	3.85775	3.41087	3.87604	5.2272	8.42351	1.80246	14.1214	1.6389	16.0664	5.1274	5.19227	1.70821	5.23274	4.88622	3.7014	2.82428	2.31143	1.84626		39.8608	5.02304	11.455	6.18414	38.4794	6.86566	41.6391	7.36131	40.8153	7.1525	27.0381	5.45903	51.1322	8.62797	41.4785	6.28511	34.6404	6.62472	31.0813	9.42193		1.59707	1.37229	1.79803	1.40674	1.50988	1.79356	1.97517	1.63279
3.07821	2.92574	3.896	3.44525	3.89379	5.1906	8.42739	1.80191	14.0604	1.6389	16.0525	5.11298	5.25991	1.72817	5.2272	4.86349	3.74797	2.81874	2.34525	1.83961		39.8539	4.99321	11.8956	6.36313	39.0553	6.82206	42.6029	7.41409	40.836	7.1502	27.2974	5.44985	51.1207	8.57519	41.3179	6.27593	34.6243	6.62013	31.8822	9.50224		1.58643	1.36272	1.80334	1.4078	1.48861	1.79186	1.9824	1.63088
3.19298	2.92297	3.95921	3.49404	3.9021	5.14847	8.44069	1.80246	13.99	1.64057	16.0497	5.11243	5.34973	1.73482	5.22941	4.721	3.74963	2.80155	2.33694	1.82741		39.8401	4.93584	12.3706	6.49851	40.065	6.7647	43.0343	7.47605	40.836	7.1502	27.5636	5.42231	51.1551	8.50635	41.1137	6.26446	35.3265	6.62243	32.2562	9.58714		1.57814	1.34932	1.83354	1.41503	1.47606	1.79654	1.99155	1.63088
3.37761	2.92242	4.01742	3.53063	3.90155	5.11132	8.48117	1.80246	13.9085	1.63558	16.037	5.12075	5.38687	1.73039	5.23219	4.58405	3.75019	2.81985	2.3508	1.81244		39.8218	4.86012	12.5174	6.57883	41.0173	6.72569	43.1422	7.55177	40.8452	7.1502	27.6646	5.35118	51.2814	8.43292	40.8934	6.25069	37.02	6.61095	32.3113	9.67434		1.58941	1.34613	1.82759	1.43183	1.47606	1.80653	2.00962	1.63088
3.54505	2.91466	4.03627	3.53285	3.89323	5.07916	8.50612	1.80801	13.8714	1.63558	16.0331	5.12962	5.40129	1.7071	5.27543	4.57241	3.74575	2.86143	2.3641	1.8069		39.7988	4.80505	12.5197	6.62931	41.6437	6.70733	43.1743	7.59996	40.8727	7.1502	27.6806	5.32594	51.3525	8.36638	40.7373	6.23922	38.4197	6.59948	32.2723	9.75466		1.64895	1.34847	1.82397	1.44821	1.46075	1.80781	2.00962	1.63088
3.58663	2.91022	4.0396	3.52786	3.89379	5.08471	8.52497	1.81577	13.8669	1.63613	16.0614	5.11243	5.43844	1.71098	5.35971	4.57574	3.74741	2.85478	2.36577	1.81355		39.7896	4.78669	12.4945	6.64537	42.0224	6.7211	43.3211	7.63897	40.937	7.1502	27.6806	5.36036	51.3341	8.3159	40.6937	6.23922	39.1058	6.59719	32.3228	9.80973		1.68872	1.34847	1.82355	1.45182	1.43055	1.80781	2.00665	1.63088
3.6016	2.92963	4.0396	3.52287	3.896	5.10633	8.53439	1.82131	13.8836	1.63225	16.098	5.10079	5.48279	1.72152	5.42069	4.59015	3.74464	2.8326	2.37464	1.81854		39.7827	4.79357	12.5909	6.64767	42.2564	6.74863	43.5322	7.69863	41.0242	7.14791	27.7633	5.40625	51.3341	8.28607	40.7419	6.26446	39.2848	6.60177	32.4857	9.83497		1.70595	1.35549	1.83014	1.45012	1.43055	1.7959	2.0075	1.62811
3.63376	2.95901	4.0518	3.53008	3.85886	5.1091	8.53384	1.82076	13.903	1.63447	16.1584	5.09857	5.5022	1.72373	5.44842	4.57851	3.73633	2.84812	2.37353	1.8069		39.785	4.79587	12.9167	6.64996	42.3688	6.7624	43.6745	7.74452	41.0448	7.14561	28.3209	5.43608	51.3295	8.25394	40.6823	6.31723	39.1999	6.61554	32.5798	9.84874		1.73402	1.35485	1.80122	1.45012	1.41907	1.7825	2.0243	1.63917
3.64873	2.97065	4.06455	3.57942	3.82836	5.12296	8.55768	1.81965	13.9046	1.66441	16.2632	5.09136	5.50164	1.72096	5.46006	4.62231	3.73355	2.91244	2.38074	1.81022		39.808	4.79128	13.1691	6.63849	42.3826	6.77617	43.7594	7.77206	41.0907	7.14332	28.9152	5.44985	51.3158	8.18969	40.5721	6.36083	39.0232	6.61095	32.387	9.84874		1.74678	1.35825	1.78527	1.44544	1.40695	1.77485	2.026	1.62854
3.66037	2.97343	4.0651	3.6831	3.78844	5.09025	8.65859	1.81466	13.9202	1.71154	16.3325	5.07417	5.50164	1.72096	5.46283	4.72987	3.74797	2.97176	2.42176	1.84682		39.8195	4.77521	13.1668	6.60177	42.3826	6.82665	43.8214	7.80648	41.428	7.13414	29.163	5.44755	51.3204	8.10938	40.5216	6.38608	38.8396	6.61325	32.1507	9.84874		1.73976	1.36803	1.78612	1.4297	1.41397	1.77506	2.026	1.57835
3.69696	2.96345	4.07675	3.76571	3.5334	5.03259	8.78999	1.80634	13.9689	1.76199	16.3331	5.04257	5.49832	1.72595	5.46117	4.77145	3.81838	2.98895	2.47388	1.89616		39.8218	4.74768	13.3481	6.54211	42.3666	6.8932	43.8374	7.82254	41.8365	7.12725	29.2869	5.44985	51.3686	8.04971	40.4689	6.39984	39.2114	6.64996	32.0658	9.84874		1.76294	1.3759	1.78272	1.43566	1.41482	1.77506	2.0294	1.53157
3.72912	2.89858	4.08839	3.76682	3.41087	4.97548	8.85929	1.80634	13.9667	1.81688	16.2593	4.96052	5.49333	1.72207	5.45673	4.78531	3.92317	2.98673	2.4944	1.90282		39.8263	4.71555	13.3504	6.47098	42.3574	6.93221	43.8053	7.81566	42.1348	7.12725	29.3374	5.45444	51.4144	8.02447	40.5125	6.38378	40.6157	6.66832	32.0979	9.84644		1.80058	1.38526	1.77485	1.44289	1.41482	1.77698	2.02642	1.50392
3.73355	2.84313	4.12443	3.76238	3.4203	4.92559	8.87759	1.79636	13.9113	1.86733	16.1052	4.8962	5.50109	1.72207	5.44232	4.78587	3.98527	2.98784	2.47	1.90115		39.8424	4.66048	13.3527	6.38837	42.4675	6.95286	43.764	7.80877	42.479	7.13414	29.3374	5.45673	51.4397	8.01988	40.7282	6.35166	42.2931	6.63161	32.1736	9.84415		1.79505	1.38547	1.77357	1.44523	1.41439	1.78187	2.03025	1.49605
3.74132	2.83648	4.18708	3.75906	3.36208	4.89121	8.90198	1.79803	13.7827	1.87953	15.9666	4.90618	5.52437	1.72318	5.43345	4.78254	4.06122	3.03996	2.44782	1.90503		39.8699	4.59853	13.5661	6.30806	42.6442	6.96892	43.7525	7.81107	42.736	7.14102	29.3328	5.45903	51.4443	8.01529	40.8544	6.331	43.7204	6.59489	32.2654	9.84415		1.75996	1.38526	1.77166	1.44672	1.41524	1.79144	2.03046	1.51987
3.75351	2.86198	4.23421	3.74963	3.37484	4.89676	8.92859	1.81244	13.6185	1.88729	15.9017	4.7393	5.51772	1.72318	5.4401	4.78254	4.12609	3.076	2.44782	1.90171		39.9594	4.63295	14.0663	6.22315	42.8393	6.9781	43.7961	7.81107	42.713	7.14561	29.3466	5.47509	51.4443	8.00841	40.7259	6.31723	44.9664	6.58342	32.3618	9.84644		1.75996	1.38547	1.75826	1.44906	1.41801	1.80143	2.03089	1.53114
3.71193	2.88583	4.24751	3.74963	3.39313	4.96994	8.92638	1.81133	13.552	1.89394	15.8501	4.38779	5.45396	1.71985	5.43955	4.78365	4.15326	3.07156	2.4384	1.88951		40.0971	4.88306	14.1375	6.17726	42.9838	6.98269	43.9223	7.795	42.8966	7.15479	29.381	5.49574	51.4443	7.98317	40.641	6.30117	45.9554	6.58342	32.4513	9.83497		1.77995	1.38462	1.75273	1.45352	1.42566	1.80398	2.03259	1.52412
3.70694	2.88915	4.2525	3.75739	3.39202	5.0143	8.92194	1.81133	13.501	1.89672	15.7908	4.09338	5.38798	1.75145	5.42402	4.78642	4.16047	3.06823	2.4068	1.92388		40.1637	5.23644	14.1306	6.15661	43.0228	6.9804	44.099	7.78353	43.4519	7.16397	29.4407	5.49574	51.4512	7.94875	40.5423	6.30347	46.5566	6.56735	32.5706	9.81432		1.8127	1.39547	1.75954	1.45926	1.438	1.80653	2.03472	1.53263
3.70639	2.91743	4.26304	3.75462	3.39258	4.99212	8.90475	1.81577	13.4816	1.89505	15.7908	3.94867	5.34418	1.77086	5.41127	4.79862	4.1649	3.06713	2.37076	1.98321		40.1889	5.36265	14.1306	6.14284	43.0274	6.97351	44.2275	7.78353	44.2138	7.17085	29.4751	5.47968	51.5407	7.89368	40.4023	6.29888	46.8159	6.55129	32.4536	9.78449		1.82589	1.40908	1.75337	1.46415	1.44119	1.80675	2.05067	1.5271
3.70971	2.92519	4.25361	3.76072	3.39091	4.97271	8.87703	1.81965	13.5675	1.89727	15.8973	3.9265	5.31591	1.80357	5.40905	4.81913	4.17211	3.05715	2.36854	2.01093		40.2417	5.37642	14.1765	6.14284	43.0114	6.96892	44.2436	7.78124	44.8609	7.17085	29.4751	5.47738	51.7219	7.86384	40.3771	6.26216	46.9008	6.53752	31.9005	9.75466		1.82589	1.39738	1.73593	1.46437	1.44502	1.80249	2.04493	1.53731
3.71526	2.91909	4.25694	3.76349	3.38759	4.96717	8.82713	1.81244	13.6989	1.89561	16.1684	3.92761	5.26823	1.85125	5.41016	4.82357	4.18043	3.06103	2.35579	2.10019		40.322	5.36495	14.1765	6.1589	42.9494	6.95974	44.2092	7.76976	45.2464	7.17085	29.5072	5.49804	52.0179	7.86384	40.4895	6.22086	46.8871	6.52605	31.203	9.734		1.82397	1.40312	1.737	1.46734	1.44331	1.79356	2.04875	1.522
3.73799	2.91798	4.27524	3.7768	3.38759	4.97548	8.81882	1.81244	13.7882	1.90115	16.6141	3.9265	5.25547	1.85513	5.41182	4.81248	4.17655	3.06269	2.34969	2.39848		40.3771	5.34659	14.3692	6.18414	42.8438	6.95056	44.2849	7.74223	45.5424	7.18921	29.5485	5.51639	52.4425	7.86155	40.7029	6.19562	46.871	6.51458	30.3998	9.70876		1.82206	1.40163	1.73742	1.46352	1.44289	1.80313	2.04535	1.52434
3.76737	2.91632	4.28078	3.70805	3.3887	5.11853	8.88701	1.81189	13.8337	1.90115	16.9551	3.91319	5.31313	1.86234	5.41293	4.78199	4.12942	3.0699	2.39404	2.69011		40.4	5.342	14.5413	6.20709	42.6878	6.94827	44.4249	7.72616	45.6869	7.22363	29.5944	5.53016	52.665	7.85237	40.8681	6.18414	46.8641	6.5031	29.7275	9.67434		1.81844	1.40504	1.73189	1.46373	1.45182	1.8042	2.04195	1.52434
3.789	2.91521	4.28078	3.55447	3.38925	5.17563	9.05057	1.81965	13.8364	1.91834	17.0671	3.92095	5.34086	1.87121	5.41238	4.7709	4.10724	3.09817	2.47721	2.79545		40.4023	5.34888	14.5735	6.22545	42.6052	6.93909	44.2987	7.72846	45.6732	7.23969	29.7045	5.53016	52.6926	7.84549	40.9094	6.19562	46.8802	6.48704	29.5187	9.63533		1.82397	1.40355	1.70786	1.46586	1.46075	1.80653	2.0345	1.51668
3.79011	2.91576	4.28078	3.42917	3.32937	5.13627	9.22411	1.82741	13.8691	1.92555	17.0771	3.92871	5.32478	1.88175	5.42236	4.77644	4.11889	3.09318	2.53598	2.79102		40.4069	5.36953	14.757	6.23463	42.7383	6.90926	43.92	7.72846	45.7397	7.2374	29.9799	5.51181	52.6995	7.8409	40.9186	6.17038	46.8894	6.4595	29.5508	9.59173		1.82652	1.40355	1.70021	1.47075	1.4599	1.82631	2.01685	1.51668
3.79621	2.92907	4.28189	3.35654	3.2706	4.98325	9.38323	1.8385	13.9373	1.92721	17.076	3.91763	5.29761	1.8945	5.434	4.75926	4.05845	3.076	2.55705	2.80599		40.4574	5.40854	14.897	6.23233	42.931	6.87255	43.6103	7.7537	45.765	7.23281	30.5352	5.48886	52.7086	7.82942	40.9393	6.08777	46.9054	6.43197	29.6472	9.54813		1.82525	1.38058	1.69702	1.47032	1.4565	1.82844	2.01281	1.5137
3.80064	2.94737	4.29187	3.35432	3.25951	4.88456	9.57506	1.84072	13.9168	1.92943	17.091	3.90986	5.28375	1.89173	5.44343	4.73597	3.97307	3.0699	2.54263	2.82207		40.5469	5.43608	15.1793	6.23004	43.1789	6.83813	43.3005	7.77435	45.7191	7.21216	31.3246	5.46821	52.7018	7.83172	40.9025	6.01663	46.9329	6.42279	29.5783	9.50454		1.82482	1.38058	1.68383	1.46947	1.45756	1.82759	2.01494	1.51392
3.79288	2.94127	4.30961	3.35432	3.26007	4.88456	9.74749	1.8385	13.8375	1.94551	17.1109	3.90709	5.29317	1.8945	5.44232	4.73819	3.98139	3.0577	2.52655	2.82539		40.5698	5.43608	15.5258	6.22774	43.3349	6.806	42.9081	7.78124	45.6778	7.17085	31.9786	5.4292	52.7706	7.87073	40.953	5.99598	46.9995	6.4205	29.241	9.46553		1.82419	1.37867	1.66278	1.46713	1.46713	1.82419	2.02026	1.51392
3.80009	2.91743	4.31904	3.35543	3.25785	4.89066	9.87113	1.84016	13.8248	1.94662	17.1364	3.88935	5.3026	1.90392	5.44343	4.73209	3.99026	3.03109	2.5138	2.93462		40.5583	5.43608	15.6382	6.20939	43.3418	6.77846	42.7429	7.78583	45.6663	7.1502	32.309	5.39478	52.9037	7.94416	41.3707	5.99369	47.3139	6.4182	28.9427	9.4334		1.81398	1.37782	1.65193	1.45437	1.48989	1.82397	2.01622	1.50754
3.79288	2.89082	4.33012	3.32937	3.25785	4.89953	9.96649	1.83739	13.8497	1.95271	17.1248	3.85996	5.30426	1.90503	5.45451	4.70215	3.96697	3.02	2.51657	3.28058		40.5515	5.44296	15.6588	6.15661	43.2913	6.74863	43.0917	7.78353	45.7237	7.1502	32.4168	5.39478	53.0161	8.01759	41.8112	5.99369	47.8715	6.43426	28.6834	9.42422		1.80675	1.37845	1.65151	1.44629	1.49775	1.82376	2.00409	1.49201
3.79399	2.90135	4.34787	3.1697	3.25619	4.88899	10.0663	1.83906	13.7477	1.98709	17.0516	3.84777	5.30149	1.91002	5.47281	4.70492	3.96032	3.0261	2.53265	3.54394		40.5698	5.44526	15.668	6.13366	43.2385	6.68897	43.6126	7.77665	45.8843	7.1525	32.4237	5.38789	53.0712	8.07725	41.9856	5.99369	48.156	6.4595	28.5136	9.42193		1.81143	1.37399	1.65002	1.45097	1.48882	1.82929	1.99793	1.49371
3.79565	2.95846	4.36783	2.95901	3.25508	4.88567	10.1733	1.83906	13.5892	2.00483	16.9446	3.84777	5.3087	1.92776	5.50885	4.68163	3.9764	2.99727	2.54263	3.64873		40.6065	5.44067	15.6657	6.1589	43.2431	6.59948	43.7824	7.77206	46.0151	7.16167	32.41	5.3833	53.0712	8.13691	42.0155	5.99828	48.2157	6.48934	28.5595	9.40816		1.81121	1.37399	1.63428	1.4548	1.47776	1.83971	1.99559	1.48925
3.79454	3.00725	4.37392	2.82872	3.23068	4.87901	10.2093	1.83906	13.4688	2.01259	16.928	3.84999	5.3148	1.93664	5.56928	4.64892	3.99303	2.97287	2.56093	3.71415		40.6318	5.4269	15.707	6.16349	43.2684	6.4618	43.7984	7.76517	46.0954	7.17774	32.426	5.38101	53.14	8.19198	42.0155	6.01204	48.2409	6.52835	28.5664	9.40357		1.80101	1.37739	1.61429	1.44821	1.48946	1.84226	1.99453	1.4716
3.80397	3.01279	4.37226	2.81652	3.21405	4.83022	10.2049	1.83684	13.3851	2.03366	17.0161	3.84001	5.31646	1.93331	5.61918	4.65003	3.98748	2.95735	2.6136	3.7524		40.7213	5.41543	15.9319	6.12219	43.2385	6.32871	43.7365	7.756	46.2216	7.20757	32.4444	5.37183	53.3626	8.23558	42.0155	6.02122	48.2317	6.56506	28.5297	9.42652		1.79888	1.3776	1.61174	1.43842	1.49584	1.83695	1.99623	1.46309
3.88325	3.00447	4.38446	2.81319	3.21405	4.7903	10.1822	1.8324	13.3441	2.03532	16.979	3.84111	5.32201	1.93608	5.63083	4.64338	3.952	2.93462	2.69455	3.74242		41.0655	5.40625	16.1476	6.09236	43.2661	6.26675	43.6906	7.75141	46.3868	7.25346	32.4352	5.34888	53.4383	8.28836	42.0889	6.05564	48.2248	6.58571	28.4425	9.45864		1.7993	1.39462	1.62641	1.44395	1.49414	1.83567	1.98708	1.45607
3.9459	3.00059	4.43602	2.8581	3.22458	4.77312	10.15	1.83185	13.3441	2.03754	16.9596	3.84777	5.3281	1.93608	5.60698	4.63063	3.92151	2.92741	2.76662	3.73466		41.4441	5.38789	16.2417	6.06941	43.4014	6.23233	43.6883	7.756	46.4235	7.281	32.4168	5.31905	53.4315	8.36408	42.2931	6.1589	48.234	6.62243	28.291	9.477		1.7993	1.41546	1.62854	1.47968	1.49839	1.83673	1.9722	1.44374
3.96143	3.01113	4.52861	2.86476	3.24399	4.76535	10.1522	1.83074	13.3086	2.03699	16.9346	3.84111	5.33587	1.93608	5.60421	4.62508	3.89379	2.94016	2.82207	3.73799		41.4762	5.35347	16.3541	6.01204	43.4634	6.17267	43.6906	7.74682	46.4006	7.29477	32.6234	5.29152	53.4269	8.39621	42.5455	6.31265	48.234	6.6752	28.3667	9.48618		1.80016	1.41801	1.60642	1.48393	1.50009	1.83546	1.96497	1.43821
3.98859	3.02277	4.62785	2.8581	3.2512	4.777	10.1866	1.82298	13.2632	2.03699	16.8692	3.84001	5.37024	1.93497	5.64524	4.62009	3.86939	2.95125	2.89525	3.73854		41.3546	5.33511	16.3495	5.97303	43.5093	6.11071	43.7089	7.72846	46.3776	7.30394	32.963	5.26857	53.4315	8.38933	42.713	6.45492	48.2432	6.69356	28.6398	9.48388		1.79909	1.41269	1.57346	1.49116	1.5018	1.8227	1.95625	1.438
4.01964	3.02554	4.73098	2.86309	3.26007	4.82024	10.1988	1.82298	13.2615	2.04863	16.8758	3.84943	5.44897	1.93664	5.66797	4.61788	3.86884	2.97897	2.95513	3.73688		41.2261	5.32135	16.9209	5.95468	43.6791	6.01893	43.7824	7.71699	46.334	7.31312	33.0341	5.26627	53.4177	8.37097	42.7658	6.5926	48.2501	6.68438	28.9932	9.48159		1.79548	1.42949	1.54752	1.49435	1.51264	1.81908	1.94689	1.43523
4.02241	3.02388	4.82357	2.88305	3.26339	4.89398	10.1988	1.82298	13.2415	2.04087	16.918	3.86218	5.53435	1.94218	5.66908	4.62342	3.85775	3.03608	2.97398	3.73744		41.1389	5.2984	17.4418	5.92714	43.8466	5.91796	44.0164	7.70322	46.3157	7.31771	33.0272	5.26627	53.4315	8.36867	42.814	6.74634	48.2501	6.6752	29.28	9.48159		1.79611	1.44204	1.53582	1.48202	1.51902	1.82015	1.94349	1.43204
4.01354	3.00558	4.86792	2.88305	3.2573	4.95275	10.1971	1.81521	13.1911	2.04142	16.9318	3.86551	5.63748	1.92776	5.69957	4.62453	3.85941	3.07322	3.00836	3.73411		41.0815	5.27316	17.4648	5.90878	43.8351	5.8606	44.3905	7.70092	46.2996	7.32001	33.0272	5.24103	53.521	8.37785	42.8806	6.91385	48.2386	6.66832	29.3512	9.47471		1.79463	1.44608	1.52944	1.47776	1.52965	1.8227	1.94285	1.43204
4.00578	2.96733	4.89121	2.88305	3.2573	5.01208	10.1971	1.81632	13.1972	2.03976	16.9313	3.87327	5.7212	1.89284	5.7334	4.62508	3.86828	2.9823	3.05437	3.73245		41.0127	5.26857	17.8434	5.8996	43.8214	5.82847	44.4754	7.70092	46.295	7.32689	33.0181	5.23185	53.5554	8.3985	42.7704	7.03317	48.2478	6.66832	29.3535	9.45176		1.7825	1.44778	1.50626	1.48053	1.54177	1.8227	1.94242	1.42375
3.99303	2.94848	4.89676	2.88472	3.2512	5.10744	10.2177	1.82298	13.2421	2.04364	16.9291	3.87992	5.74116	1.88064	5.73949	4.62619	3.84278	2.88915	3.08043	3.72856		40.9737	5.26627	18.1256	5.87436	43.8145	5.79405	44.4249	7.69633	46.3317	7.34066	33.0135	5.23415	53.6265	8.46964	42.0935	7.07907	48.2386	6.67291	29.3397	9.44258		1.76996	1.44097	1.4733	1.47649	1.54624	1.82419	1.95157	1.38483
3.99081	2.9446	4.89953	2.88472	3.21627	5.19615	10.2165	1.83961	13.2277	2.06083	16.9202	3.87937	5.7467	1.8823	5.73838	4.55301	3.81284	2.89525	3.10704	3.73134		40.9737	5.25939	18.4125	5.83306	43.803	5.78028	44.4754	7.70322	46.3386	7.34295	32.9102	5.23415	53.7619	8.51783	41.2743	7.08136	48.1973	6.67979	29.4016	9.46323		1.76996	1.42417	1.45437	1.46011	1.53986	1.82652	1.95412	1.3255
3.99081	2.92685	4.90174	2.89581	3.16027	5.21666	10.216	1.83961	13.144	2.06083	16.8864	3.87992	5.75557	1.8823	5.75225	4.32347	3.83335	2.88971	3.12922	3.75739		40.9416	5.26398	18.814	5.81241	43.7892	5.7711	44.4822	7.74452	46.4511	7.32919	32.8253	5.23415	53.7757	8.52471	40.836	7.06989	48.2294	6.64537	29.4705	9.47241		1.77038	1.41971	1.4531	1.45118	1.51626	1.82801	1.95327	1.31232
3.99636	2.92907	4.90951	2.91133	3.12368	5.21278	10.2432	1.85403	13.0952	2.06526	16.8631	3.88159	5.75169	1.89339	5.77165	4.14162	3.85608	3.02388	3.13477	3.789		40.6754	5.27545	19.4451	5.8147	43.7548	5.72062	44.4776	7.76747	46.3753	7.31083	32.8528	5.24103	53.7825	8.46964	40.5905	7.03547	48.2226	6.58571	29.4728	9.47012		1.76698	1.42141	1.45437	1.45352	1.50094	1.82929	1.95944	1.33188
4.03794	2.97176	4.91173	2.90689	3.11869	5.21555	10.277	1.88785	13.1295	2.05528	16.8792	3.88325	5.75391	1.93553	5.78108	4.05124	3.8328	3.20185	3.1331	3.80452		40.1912	5.2984	20.613	5.817	43.7686	5.66325	44.4088	7.77206	46.3731	7.28329	32.885	5.23644	53.8284	8.36179	40.2486	6.95974	48.2248	6.52835	29.4705	9.47471		1.75592	1.4246	1.45607	1.45331	1.49223	1.82971	1.9622	1.33188
4.09338	2.99006	4.91117	2.95846	3.12312	5.25825	10.3047	1.89173	13.1495	2.06249	16.9108	3.88713	5.75169	1.95549	5.77941	3.99247	3.81395	3.23955	3.12978	3.80508		39.9434	5.32364	21.9141	5.81241	43.5185	5.63801	44.278	7.77665	46.4717	7.25576	32.8873	5.24333	53.9065	8.29295	39.8631	6.82895	48.2547	6.4595	29.4774	9.48388		1.75337	1.43141	1.47202	1.45331	1.49095	1.83014	1.96199	1.31423
4.10225	2.99228	4.93168	2.99671	3.11924	5.38521	10.3213	1.89173	13.1445	2.11794	16.9573	3.88713	5.75058	1.95493	5.77775	3.9703	3.81616	3.23955	3.13255	3.81727		40.3243	5.31905	22.6874	5.81241	42.8209	5.61736	44.1679	7.77894	46.2055	7.2351	32.9033	5.24792	53.9501	8.25394	39.7506	6.73028	48.374	6.39066	29.4567	9.49765		1.75699	1.43672	1.47096	1.45352	1.49074	1.83886	1.96667	1.30424
4.10336	2.98618	4.95442	3.03497	3.11924	5.54045	10.3296	1.89838	13.124	2.14787	16.9806	3.88658	5.75114	1.9566	5.76943	3.97418	3.82005	3.21239	3.12978	3.85054		40.5836	5.28004	23.0293	5.817	41.8594	5.59212	44.4776	7.78353	45.8774	7.22593	32.8689	5.24792	53.934	8.23558	40.2509	6.7211	48.5025	6.34248	29.4452	9.51601		1.76698	1.43141	1.47521	1.45586	1.48904	1.84099	1.96518	1.29615
4.10724	2.98507	4.996	3.11425	3.11758	5.57594	10.343	1.89838	13.1118	2.15231	17.0233	3.89434	5.7528	1.96103	5.7345	3.97085	3.82171	3.18855	3.12867	3.8705		40.6685	5.21809	23.1578	5.817	41.171	5.56688	45.2624	7.79271	45.6296	7.23281	32.924	5.24562	53.8927	8.2287	41.0792	6.7211	48.6287	6.29658	29.4705	9.52519		1.76698	1.42035	1.47628	1.45884	1.48733	1.83673	1.99176	1.30168
4.1078	2.97398	5.04035	3.15916	3.11314	5.56152	10.364	1.90171	13.2072	2.14954	17.1409	3.90432	5.7528	1.96159	5.71621	3.96697	3.82947	3.18855	3.12867	3.88769		40.7557	5.16531	23.1854	5.80093	40.8498	5.56229	45.983	7.79271	45.4529	7.25805	32.963	5.25939	53.9248	8.21722	41.4854	6.7211	48.7228	6.25298	29.4865	9.52748		1.76358	1.42035	1.4767	1.46245	1.48797	1.84737	1.98708	1.30168
4.10669	2.95568	5.05089	3.16082	3.11536	5.56041	10.3662	1.89727	13.3336	2.15176	17.3033	3.90875	5.75114	1.97212	5.72951	3.96863	3.84333	3.1891	3.12867	3.89268		40.797	5.15843	23.19	5.7711	40.7465	5.56688	46.4029	7.79042	45.3382	7.26035	32.9354	5.29152	54.0992	8.2287	41.6208	6.7188	48.7343	6.23692	29.5256	9.54125		1.76166	1.42035	1.47606	1.47075	1.48138	1.85672	1.98113	1.27425
4.11223	2.94349	5.05033	3.16082	3.11592	5.5593	10.3513	1.89394	13.2282	2.15176	17.5656	3.90875	5.73284	1.98543	5.72619	3.97251	3.85054	3.1891	3.12756	3.89545		40.8498	5.16301	23.1923	5.75504	40.7511	5.57376	46.4855	7.79042	45.2762	7.25346	32.924	5.2984	54.292	8.23099	41.669	6.7188	48.7297	6.23463	29.5875	9.5642		1.76166	1.41907	1.47606	1.47457	1.46628	1.858	1.98113	1.27021
4.11833	2.93406	5.05255	3.16082	3.10926	5.54156	10.3274	1.89394	12.9216	2.1512	17.8505	3.90986	5.68959	1.98598	5.6652	3.97196	3.85276	3.22237	3.12922	3.91763		41.1251	5.1676	23.1968	5.75045	40.8796	5.57606	46.4924	7.79271	45.2624	7.25576	32.9331	5.2984	54.588	8.23099	41.5726	6.71421	48.7136	6.23233	29.6954	9.58485		1.76188	1.43077	1.4801	1.47394	1.47436	1.858	1.97454	1.27042
4.13884	2.91687	5.06641	3.24122	3.11037	5.53491	10.2809	1.88895	12.671	2.14122	17.9847	3.91984	5.66076	1.98432	5.59146	3.97141	3.85608	3.30609	3.12978	3.91873		41.4854	5.17449	23.2496	5.75045	40.5698	5.57835	46.5452	7.795	45.2762	7.2351	32.9676	5.29381	54.8702	8.23329	41.4556	6.69356	48.7159	6.22086	30.4228	9.6078		1.76188	1.43864	1.4801	1.47755	1.47011	1.86799	1.9722	1.26957
4.21369	2.88804	5.07085	3.3826	3.127	5.54045	10.2215	1.86068	12.4792	2.12958	18.018	3.92151	5.62473	1.9821	5.57483	3.97085	3.84721	3.33658	3.12922	3.91984		41.2582	5.1699	23.2818	5.75504	38.9819	5.58065	46.6278	7.795	45.0903	7.20298	32.9745	5.2548	54.9207	8.24017	41.3271	6.67291	48.7297	6.19791	31.1869	9.61697		1.75231	1.43864	1.4699	1.48733	1.44587	1.89458	1.97879	1.27489
4.37226	2.87196	5.07085	3.42529	3.13421	5.59479	10.1689	1.81577	12.3206	2.12736	18.0135	3.92262	5.57316	1.98543	5.57649	3.9703	3.8267	3.35543	3.12645	3.93038		40.7488	5.18596	23.2886	5.76651	36.7767	5.58065	46.8641	7.795	44.4891	7.19609	33.0318	5.17678	54.9046	8.23788	41.116	6.68209	48.3786	6.17726	31.4829	9.60321		1.75358	1.43481	1.47521	1.47947	1.43608	1.91286	1.97454	1.30126
4.49368	2.86975	5.07528	3.44525	3.13532	5.65577	10.1234	1.79636	12.2696	2.09742	17.9986	3.92539	5.53324	1.98543	5.57649	3.96919	3.79676	3.49958	3.127	3.93204		40.3771	5.20661	23.3667	5.7711	35.5376	5.58294	47.0523	7.79271	44.0761	7.17544	33.1902	5.06893	54.9069	8.23788	40.9943	6.69815	47.6076	6.17726	31.4439	9.58255		1.75443	1.43545	1.47904	1.48287	1.44097	1.91584	1.94944	1.3457
4.53804	2.88971	5.08471	3.46743	3.13366	5.67074	10.1029	1.80135	12.2763	2.08245	17.9764	3.92982	5.50386	1.99541	5.57427	3.96198	3.7829	3.5833	3.12867	3.92871		40.1591	5.20661	23.5365	5.7711	35.5261	5.57376	47.1303	7.77894	44.0669	7.14102	33.3141	4.92207	54.8083	8.23329	40.9324	6.70274	46.9857	6.17497	31.4714	9.54355		1.75656	1.44821	1.47691	1.47543	1.46415	1.91584	1.94838	1.36314
4.54247	2.98451	5.09413	3.46687	3.1331	5.69181	10.1112	1.79581	12.3195	2.09908	17.9747	3.93038	5.49554	1.99541	5.55819	3.96309	3.7768	3.58774	3.13088	3.92539		40.2119	5.20661	23.6489	5.76881	35.7051	5.56917	47.3483	7.7537	44.1702	7.16167	33.4219	4.74079	54.4296	8.23329	40.8589	6.68668	46.8182	6.17497	31.6137	9.49765		1.75358	1.45225	1.47691	1.4784	1.47564	1.91584	1.94625	1.36697
4.54247	3.00447	5.10799	3.47408	3.14641	5.71454	10.1084	1.80745	12.3589	2.11405	18.0019	3.9265	5.50275	1.99762	5.47725	3.96531	3.75518	3.5894	3.12645	3.92372		40.3426	5.21579	23.8095	5.75045	35.8061	5.57376	47.3207	7.75141	44.1426	7.21904	33.4793	4.57558	53.7022	8.26541	40.9255	6.64537	46.9674	6.17497	31.655	9.44946		1.75486	1.44416	1.47309	1.4784	1.4867	1.91414	1.94923	1.36825
4.55134	3.00392	5.14403	3.47242	3.15306	5.71676	10.1356	1.83628	12.3217	2.1257	18.064	3.92483	5.50275	1.99707	5.31036	3.96032	3.72746	3.59938	3.1198	3.93038		40.4115	5.23185	24.0895	5.70456	35.8198	5.57376	48.0665	7.795	44.0761	7.23281	33.3783	4.41725	53.023	8.36179	41.1366	6.58342	47.1165	6.17955	31.5839	9.39898		1.75167	1.44672	1.46394	1.4952	1.50498	1.91839	1.94731	1.38164
4.64393	3.00115	5.22886	3.47408	3.14807	5.71565	10.231	1.83628	12.2696	2.12348	18.1056	3.9265	5.47447	1.99651	5.15235	3.94202	3.72025	3.60049	3.12479	3.95422		40.3289	5.25021	24.2685	5.6862	35.8244	5.56917	49.5902	7.84549	44.0371	7.22134	32.9125	4.29333	52.6329	8.39162	41.2353	6.549	47.2404	6.16808	31.5724	9.37144		1.75146	1.45607	1.45225	1.49308	1.50732	1.91712	1.93902	1.3944
4.86737	2.99948	5.31868	3.46687	3.14585	5.70678	10.2969	1.82741	12.2092	2.12237	18.13	3.93149	5.42901	1.99929	5.08859	3.92594	3.72413	3.66924	3.14308	3.95477		39.964	5.29152	24.4268	5.69997	35.8956	5.56917	50.2373	7.85237	44.3147	7.21904	32.0818	4.23367	52.4585	8.36638	41.2215	6.51228	47.4401	6.14743	31.5976	9.35538		1.75082	1.46096	1.4397	1.49159	1.50307	1.91031	1.94008	1.39504
5.01319	2.99172	5.37357	3.45911	3.13865	5.68571	10.3202	1.80302	12.0939	2.12293	18.1544	3.92816	5.3719	1.99984	5.07972	3.92705	3.72025	3.74963	3.14364	3.96309		39.3812	5.35577	24.732	5.72521	35.9506	5.57147	50.453	7.82254	45.2119	7.20527	31.3957	4.22679	52.4562	8.34802	41.1779	6.48934	47.4653	6.14055	31.5976	9.33244		1.75273	1.44799	1.43247	1.49052	1.50371	1.91435	1.93647	1.39632
5.0398	2.95458	5.40794	3.43527	3.13643	5.6713	10.3452	1.79858	12.0013	2.12015	18.1666	3.92594	5.35084	2.00594	5.07251	3.9265	3.73245	3.77236	3.15972	3.97141		38.8144	5.4269	24.9913	5.74586	35.9277	5.58523	50.6893	7.77206	45.9439	7.1525	30.8175	4.24285	52.5365	8.32507	41.1596	6.55129	47.5135	6.15431	31.6206	9.31178		1.75252	1.43141	1.42758	1.49286	1.5271	1.91563	1.94668	1.40567
5.07916	2.94515	5.45673	3.42307	3.13088	5.6713	10.3413	1.79747	12.0085	2.11405	18.1671	3.94202	5.36858	2.00317	5.06309	3.90266	3.74187	3.78678	3.22458	3.97695		38.4656	5.50951	25.0968	5.75733	35.7395	5.58982	50.7582	7.73764	46.2101	7.09742	30.3035	4.25891	52.5824	8.32049	41.1458	6.65685	47.5525	6.16808	31.5678	9.3026		1.75252	1.43013	1.42588	1.47691	1.52987	1.91031	1.95986	1.41503
5.11853	2.95069	5.51051	3.44469	3.08598	5.66243	10.4045	1.8008	12.0417	2.09409	18.1582	3.97307	5.37024	1.99929	5.06419	3.90487	3.74187	3.80064	3.30165	3.97972		38.4082	5.55999	25.168	5.76651	35.4642	5.58294	50.7605	7.73075	46.2973	7.05841	30.1359	4.25662	52.5664	8.33884	41.1481	6.7624	47.5296	6.17497	31.5013	9.27966		1.75486	1.43842	1.43141	1.46522	1.53497	1.90053	1.96475	1.42439
5.14292	2.95069	5.55431	3.48184	3.0577	5.65577	10.4217	1.79415	12.0434	2.09188	18.1488	4.00855	5.34307	1.99929	5.06752	3.90709	3.73023	3.80119	3.34046	3.9775		38.3601	5.59212	25.1794	5.79175	35.3013	5.58065	50.7949	7.72616	46.3386	7.05841	30.2208	4.25203	52.6077	8.36638	41.1435	6.85648	47.4791	6.17267	31.4852	9.23606		1.75167	1.43374	1.43141	1.46522	1.53391	1.87395	1.97283	1.44884
5.17563	2.94293	5.58536	3.54006	3.05216	5.65744	10.4095	1.79137	11.9996	2.11738	18.1477	4.06566	5.31591	2.00206	5.05865	3.9082	3.74353	3.85442	3.35155	3.97695		38.4243	5.66784	25.2047	5.81241	35.1016	5.57376	50.9532	7.7124	46.3455	7.04694	30.2621	4.31169	52.6742	8.38244	41.1389	6.8932	47.3781	6.17267	31.1594	9.22		1.75316	1.42524	1.41886	1.48095	1.54539	1.85098	1.9773	1.47691
5.19726	2.94903	5.5898	3.68864	3.05271	5.66465	10.4422	1.79137	11.9514	2.1318	18.1466	4.11944	5.31424	2.00372	5.05089	3.91208	3.79343	3.95089	3.351	3.98249		38.6538	5.75963	25.386	5.82159	35.2783	5.56458	51.1987	7.70322	46.3432	6.98728	30.2484	4.38283	52.7178	8.40768	41.1389	6.87714	47.2198	6.17267	30.907	9.22		1.74252	1.44799	1.41886	1.4867	1.54667	1.85183	1.9773	1.50116
5.2028	2.94071	5.59035	3.84278	3.04883	5.67629	10.5315	1.79581	11.9342	2.1318	18.1361	4.11223	5.31147	2.00317	5.05255	3.91873	3.81339	4.01521	3.3521	3.99913		38.8465	5.83306	25.7416	5.82847	35.5009	5.56688	51.5062	7.7101	46.4121	6.89549	30.012	4.46543	52.766	8.42604	41.1641	6.8473	47.0431	6.16808	30.8358	9.22		1.74784	1.46522	1.43034	1.475	1.54879	1.85056	1.98049	1.50775
5.21888	2.94016	5.59645	3.92095	3.05049	5.68793	10.6451	1.79914	11.9309	2.13956	18.11	4.08063	5.29539	1.99707	5.04756	3.93481	3.81395	4.04515	3.35876	4.00467		39.0301	5.87207	26.2534	5.82847	35.595	5.56688	51.8045	7.72387	46.2124	6.81518	29.6724	4.61459	52.8004	8.39162	41.2215	6.82206	46.848	6.15661	30.8152	9.21541		1.76507	1.47309	1.42949	1.47138	1.54177	1.84715	1.98496	1.51668
5.24605	2.95125	5.5959	3.93481	3.05659	5.70567	10.6861	1.79914	11.9364	2.13734	18.0695	4.07619	5.2904	1.99984	5.05089	3.9642	3.8145	4.06621	3.36042	4.00855		39.216	5.87895	26.5264	5.81929	35.6776	5.56458	51.9973	7.73075	45.7282	6.73716	29.8055	4.76374	52.8142	8.36638	41.2789	6.8083	46.6278	6.13825	30.7991	9.21311		1.78846	1.49244	1.43523	1.47096	1.54156	1.82738	1.99431	1.52327
5.25547	2.96012	5.59645	3.92982	3.06768	5.7345	10.6867	1.79914	11.9575	2.14233	18.0418	4.07453	5.28985	2.0137	5.04091	3.97584	3.81228	4.10613	3.35876	4.01188		39.3422	5.87895	26.5264	5.79864	35.6776	5.56688	52.096	7.73305	45.3404	6.63849	30.2277	4.85553	52.8188	8.37326	41.3133	6.78764	46.4327	6.11071	30.7922	9.20852		1.79824	1.50541	1.47011	1.4767	1.53816	1.81738	2.00346	1.53497
5.25104	2.99006	5.61197	3.96087	3.06491	5.74116	10.6895	1.80523	11.9453	2.17338	18.0124	4.0651	5.28819	2.01315	5.04202	3.97695	3.8084	4.13829	3.35931	4.01465		39.3949	5.89502	26.6251	5.78717	35.6799	5.55311	52.1281	7.73993	44.9917	6.53293	30.7578	4.92207	52.8119	8.41457	41.311	6.76011	46.1941	6.09924	30.5949	9.19705		1.79484	1.50094	1.47266	1.47224	1.53901	1.81398	2.00622	1.53582
5.25603	3.03608	5.6214	3.96697	3.05659	5.73617	10.6673	1.80468	11.9076	2.18613	17.947	4.07841	5.31702	2.02923	5.04645	3.97861	3.80397	4.13496	3.36208	4.06233		39.3927	5.92026	26.7238	5.77569	35.9254	5.55081	52.1281	7.75141	44.6842	6.43197	31.2557	4.96567	52.8142	8.4421	41.3317	6.75093	46.0013	6.14055	30.3448	9.18787		1.79824	1.50158	1.46586	1.46756	1.53816	1.81483	2.01473	1.53646
5.29484	3.04439	5.62528	3.9642	3.0516	5.74116	10.6196	1.80468	11.8749	2.18391	17.8505	4.11112	5.35472	2.032	5.04645	3.96863	3.80729	4.13385	3.38093	4.12665		39.4454	5.94091	26.7972	5.76651	36.1962	5.55081	52.1923	7.77894	44.4524	6.34248	31.499	4.97485	52.8096	8.3985	41.3569	6.78994	46.0013	6.21627	30.51	9.18558		1.81802	1.50265	1.45607	1.46692	1.53731	1.81483	2.04386	1.53348
5.33143	3.04328	5.64302	3.97806	3.04107	5.72452	10.5437	1.8069	11.8011	2.18613	17.779	4.13663	5.40462	2.032	5.04922	3.95477	3.80785	4.14217	3.39258	4.21757		39.5533	5.96156	26.9119	5.76651	36.1801	5.54852	52.314	7.82254	44.3262	6.25528	31.5196	4.98862	52.8211	8.37785	41.4051	6.85419	45.882	6.24151	30.9666	9.20393		1.82121	1.51434	1.46586	1.48117	1.54135	1.811	2.06981	1.52987
5.35416	3.04328	5.66797	3.99802	3.03774	5.70845	10.4849	1.8008	11.7362	2.18669	17.7579	4.14494	5.49222	2.04198	5.0714	3.95477	3.80785	4.14827	3.39091	4.35396		39.6428	5.97533	27.123	5.7711	36.1044	5.56458	52.3461	7.85926	44.5671	6.19103	31.5541	5.02304	52.8509	8.38015	41.4005	6.92303	45.7741	6.20709	31.3475	9.21311		1.80483	1.51838	1.46011	1.48457	1.55028	1.79867	2.08129	1.53348
5.36581	3.04218	5.68183	4.01077	3.04827	5.70845	10.4965	1.79193	11.6875	2.18835	17.7696	4.14162	5.58259	2.07025	5.07916	3.96198	3.80674	4.15215	3.38814	4.44212		39.7116	5.97762	27.3732	5.78028	36.0447	5.58753	52.2658	7.91892	44.5648	6.14284	32.247	5.07582	52.7935	8.38933	41.2169	6.97122	45.7007	6.20709	31.5013	9.19476		1.80483	1.52072	1.45267	1.48797	1.55007	1.80164	2.09447	1.53348
5.36691	3.05326	5.70068	4.01188	3.05216	5.68516	10.5276	1.78694	11.6758	2.19556	17.8034	4.1211	5.62583	2.08301	5.08304	3.95976	3.80674	4.15326	3.39868	4.47317		39.7552	5.97762	27.5361	5.79175	36.2168	5.57835	52.1258	7.98546	43.546	6.09924	33.4334	5.18137	52.6306	8.39621	40.9393	6.96433	45.4529	6.2025	31.5013	9.18558		1.81993	1.52136	1.46394	1.48967	1.56006	1.80824	2.11765	1.53199
5.36414	3.16914	5.71898	4.01077	3.04051	5.63027	10.5631	1.78306	11.6747	2.21773	17.865	4.12332	5.66465	2.08689	5.07916	3.98471	3.80508	4.15326	3.40533	4.49257		39.7965	5.97762	27.598	5.80782	36.2811	5.56229	52.2153	8.00152	42.4905	6.06023	34.2021	5.39478	52.4539	8.4008	40.6134	7.0653	45.0375	6.16579	31.4485	9.19476		1.81908	1.52157	1.46437	1.48266	1.56091	1.80845	2.15593	1.52965
5.3647	3.34379	5.72896	4.01132	3.02388	5.597	10.6224	1.7764	11.6719	2.25266	17.9326	4.13607	5.74005	2.0891	5.05532	4.01299	3.80064	4.15492	3.40699	4.49257		39.8814	5.96386	27.6164	5.81011	36.2329	5.55999	52.2566	8.00611	42.0269	6.03728	34.4499	5.59441	52.2864	8.41916	40.4666	7.25117	44.7301	6.12678	31.3659	9.20164		1.81674	1.5203	1.46479	1.48393	1.56474	1.81313	2.20484	1.52965
5.3647	3.39147	5.73617	4.01687	3.02665	5.55099	10.649	1.77419	11.6708	2.28038	17.9331	4.11611	5.8149	2.0758	5.04756	4.00412	3.80452	4.19318	3.42252	4.47206		39.7873	5.94779	27.621	5.79864	36.1916	5.54164	52.1969	8.0107	41.825	6.01204	34.5142	5.68161	52.1166	8.46734	40.6639	7.35902	44.6497	6.10613	31.2053	9.20164		1.81334	1.52327	1.45948	1.49435	1.55964	1.81653	2.21952	1.53986
5.36414	3.38703	5.73894	4.02075	3.00725	5.49111	10.6119	1.80579	11.6675	2.30034	17.8633	4.07841	5.8465	2.0758	5.03536	4.00079	3.80397	4.24474	3.44747	4.46984		39.2366	5.92485	27.6233	5.78946	36.187	5.49115	52.1281	8.013	41.5749	5.99139	34.5738	5.71144	52.0225	8.50635	40.7832	7.38426	44.6314	6.09695	31.1502	9.20623		1.80972	1.5254	1.44821	1.48202	1.559	1.80568	2.20952	1.55347
5.3647	3.38371	5.73894	4.05124	3.00669	5.47836	10.5586	1.86789	11.6603	2.33527	17.7912	4.06289	5.8465	2.08356	5.01707	4.02907	3.80119	4.26359	3.458	4.46929		38.3715	5.89502	27.6462	5.78946	36.1411	5.44296	52.057	8.00841	41.4854	5.98451	34.6978	5.73209	51.9055	8.50865	40.6639	7.38426	44.6314	6.10154	31.203	9.22		1.80228	1.52859	1.44502	1.46139	1.54901	1.81547	2.21165	1.55538
5.36414	3.38648	5.73894	4.14605	2.97952	5.49	10.5298	1.92222	11.6608	2.4068	17.7574	4.10613	5.84373	2.09077	4.996	4.06621	3.80286	4.28023	3.45966	4.46984		37.4192	5.85601	27.6531	5.79175	35.7487	5.41313	52.0547	8.00382	41.9512	5.97992	34.84	5.74816	51.8229	8.50865	40.5079	7.40262	44.6773	6.1153	31.2557	9.22229		1.8042	1.52902	1.43417	1.47011	1.54815	1.81738	2.21867	1.56325
5.36636	3.39535	5.73783	4.18985	2.9008	5.48612	10.5292	1.95715	11.6636	2.47333	17.7275	4.10891	5.84373	2.1013	4.9777	4.1017	3.82005	4.29021	3.4519	4.47539		36.4968	5.817	27.6715	5.78487	35.1888	5.38789	52.073	8.00382	42.5226	5.97992	34.8744	5.75733	52.0317	8.51324	40.4459	7.39803	44.9113	6.07859	31.3039	9.23606		1.80356	1.53454	1.41928	1.47075	1.53965	1.81206	2.21867	1.57984
5.36691	3.39701	5.73783	4.21591	2.83537	5.44953	10.527	1.95715	11.7118	2.51158	17.6798	4.1078	5.84594	2.10297	4.97216	4.12166	3.83391	4.29021	3.45135	4.48148		36.3339	5.80323	27.8573	5.78258	34.9892	5.33741	52.2038	7.99235	42.7888	5.99369	34.7597	5.76422	52.3392	8.51783	40.384	7.36361	45.5424	5.9868	31.2879	9.25901		1.80271	1.53135	1.41992	1.47053	1.53986	1.81355	2.2108	1.57942
5.36802	3.38759	5.73617	4.25528	2.79601	5.36747	10.5409	1.95549	11.7551	2.55039	17.6576	4.11556	5.85204	2.13346	4.97216	4.12277	3.84389	4.29298	3.4519	4.49368		37.2655	5.80782	28.1029	5.78717	34.9662	5.28004	52.3208	7.9671	42.8186	6.01663	34.4476	5.7711	52.4884	8.51553	40.1269	7.33836	45.9026	5.82159	31.2007	9.27736		1.81313	1.51264	1.43183	1.47394	1.53986	1.80271	2.19081	1.57899
5.3708	3.41254	5.72563	4.26747	2.71728	5.28819	10.5486	1.99042	11.7556	2.5953	17.6515	4.13829	5.84872	2.12681	4.97216	4.15825	3.85387	4.3024	3.4519	4.51253		38.6056	5.80782	28.3507	5.79175	34.941	5.24792	52.3966	7.92351	42.7934	6.03499	34.0438	5.77799	52.4264	8.50865	39.5166	7.32919	45.82	5.6426	31.0332	9.29343		1.81653	1.51158	1.4565	1.47117	1.53986	1.79378	2.17741	1.58728
5.3708	3.46687	5.71177	4.26526	2.65407	5.2394	10.5409	2.0891	11.8222	2.61637	17.6637	4.13663	5.83597	2.12792	4.9716	4.21813	3.85276	4.33511	3.4519	4.52584		39.7782	5.79405	28.5572	5.78258	34.9456	5.23185	52.4952	7.89597	42.9127	6.06941	33.8556	5.78258	52.2704	8.49259	38.9177	7.3246	45.7925	5.52787	31.2167	9.30949		1.8144	1.51222	1.45799	1.4246	1.5422	1.78463	2.18464	1.5926
5.37967	3.55281	5.69902	4.2647	2.65962	5.22886	10.5381	2.14566	11.8477	2.61748	17.6909	4.115	5.83098	2.13069	4.97826	4.27856	3.85109	4.38945	3.45301	4.52251		40.4711	5.76651	28.626	5.75504	35.1819	5.2112	52.4952	7.89826	43.0435	6.13825	33.8808	5.79405	52.1212	8.45128	38.7869	7.3223	45.7925	5.45673	32.0061	9.31178		1.8144	1.50924	1.46309	1.38249	1.53646	1.77676	2.18932	1.59388
5.3841	3.6199	5.69514	4.27524	2.58366	5.24328	10.5608	2.15342	11.8571	2.61748	17.6964	3.93537	5.81933	2.13789	4.98713	4.31238	3.85719	4.44378	3.45745	4.51863		40.26	5.73209	28.6238	5.7275	35.2577	5.19973	52.61	7.90285	42.9173	6.2025	33.9864	5.81011	51.9996	8.41686	38.7593	7.3223	45.7948	5.4292	32.6234	9.29802		1.81504	1.50669	1.47202	1.38419	1.53965	1.77868	2.18166	1.59196
5.38133	3.60437	5.69736	4.28189	2.56315	5.26268	10.5442	2.16118	11.876	2.63411	17.6931	3.66758	5.80991	2.14566	4.99378	4.31294	3.86052	4.51142	3.46853	4.51808		39.177	5.70915	28.6283	5.75045	35.2049	5.20891	53.2181	7.90285	42.5937	6.23463	34.0346	5.81011	52.0409	8.41227	38.6515	7.3246	45.7741	5.51181	32.8345	9.28654		1.81547	1.50626	1.47883	1.39121	1.53029	1.77825	2.19421	1.59409
5.378	3.56501	5.70013	4.27967	2.56481	5.26767	10.4433	2.16728	11.8837	2.67237	17.6787	3.52232	5.79826	2.14233	5.00764	4.31016	3.84389	4.57962	3.47075	4.51808		38.5069	5.72291	28.6559	5.80093	35.2232	5.23415	53.9638	7.89597	42.2725	6.25298	34.0277	5.79405	52.2245	8.41227	38.6423	7.3246	45.6502	5.62195	33.0089	9.28195		1.81844	1.49542	1.49137	1.40823	1.53731	1.7791	2.21229	1.58665
5.38078	3.5273	5.70013	4.27801	2.57978	5.26878	10.3729	2.14954	11.8887	2.69233	17.6465	3.50236	5.78773	2.14067	5.01374	4.31016	3.84999	4.63007	3.47242	4.51808		39.5648	5.75963	28.6995	5.83306	35.2577	5.28463	54.0969	7.88909	42.1233	6.25757	34.0139	5.78487	52.3553	8.42604	38.6423	7.3246	45.4873	5.65637	33.2223	9.28195		1.81908	1.48393	1.50052	1.42417	1.54794	1.77527	2.21526	1.57155
5.38577	3.50291	5.69458	4.28023	2.59087	5.25381	10.3685	2.14455	11.8992	2.69676	17.6193	3.54283	5.7844	2.17948	5.00099	4.32735	3.88491	4.66001	3.46687	4.52029		41.2949	5.79864	28.7155	5.86518	35.4504	5.2984	54.0877	7.87761	42.0774	6.25757	34.0139	5.74586	52.369	8.48341	38.6262	7.32689	45.3634	5.65637	33.3531	9.28654		1.81887	1.48329	1.50477	1.42417	1.56538	1.77889	2.21293	1.57048
5.38466	3.50457	5.68682	4.2963	2.59087	5.22775	10.364	2.15009	11.902	2.7073	17.6082	3.59605	5.78385	2.25211	4.97271	4.38834	3.90044	4.66223	3.45357	4.52418		42.0384	5.87666	28.7247	5.91337	35.8566	5.29381	54.1635	7.87302	42.1164	6.24839	34.03	5.67702	52.3438	8.54995	38.6056	7.33378	45.0238	5.66096	33.5206	9.28884		1.81908	1.49946	1.53582	1.42439	1.59111	1.77783	2.21314	1.56942
5.3841	3.51012	5.68239	4.31072	2.58421	5.22498	10.3491	2.15009	11.8787	2.71839	17.6155	3.63875	5.78828	2.27096	4.95608	4.50144	3.89545	4.67609	3.42196	4.53249		42.2128	5.99598	28.8165	5.95927	36.2099	5.29381	54.1336	7.87302	42.2243	6.22545	34.1264	5.65407	52.4195	8.51553	38.578	7.33607	44.4891	5.64031	33.8786	9.29113		1.8227	1.48329	1.55453	1.46522	1.60664	1.78314	2.21314	1.57176
5.38743	3.51899	5.68017	4.31072	2.58754	5.23829	10.3502	2.15065	11.8566	2.71783	17.6737	3.68643	5.8149	2.25932	4.97271	4.66112	3.89545	4.71934	3.42917	4.55023		42.2977	6.12219	28.8739	5.99139	36.4486	5.29381	54.1474	7.87302	42.2702	6.21168	34.3145	5.64719	52.5297	8.48111	38.461	7.33378	44.4042	5.61048	34.2365	9.28654		1.8244	1.47904	1.54709	1.49882	1.61791	1.78569	2.21612	1.56814
5.39186	3.53784	5.67462	4.30906	2.56703	5.25048	10.3651	2.15896	11.8577	2.71894	17.7973	3.73355	5.84761	2.26042	4.97992	4.74429	3.88547	4.74041	3.43028	4.57186		42.3413	6.22545	28.8739	6.02122	36.6643	5.27775	54.1359	7.89138	42.2702	6.19103	34.5417	5.6449	52.1212	8.52012	38.3394	7.32919	44.3813	5.6013	34.3398	9.27507		1.81462	1.47947	1.54305	1.49563	1.62918	1.78591	2.22143	1.56729
5.39408	3.55447	5.66132	4.30407	2.54097	5.26767	10.3557	2.16617	11.8643	2.74001	17.932	3.7524	5.85759	2.26098	4.97937	4.74429	3.8644	4.7587	3.43471	4.60291		42.3505	6.27593	28.8693	6.04646	36.9511	5.22727	54.1061	7.9258	42.2931	6.13366	34.6656	5.6449	51.4099	8.55684	38.5207	7.32919	44.4203	5.58523	34.3375	9.28195		1.80186	1.47947	1.54539	1.49797	1.63726	1.78591	2.23377	1.55985
5.39519	3.57609	5.64912	4.30074	2.51214	5.28985	10.3452	2.16174	11.8676	2.75276	17.9836	3.74797	5.84761	2.25932	4.97548	4.79474	3.86717	4.78032	3.4519	4.62065		42.3528	6.29888	28.8463	6.06253	37.1599	5.19285	54.0831	7.97399	42.4262	6.05564	34.6886	5.66555	50.788	8.5293	38.835	7.32689	44.5144	5.54852	34.3375	9.29572		1.77931	1.4767	1.5456	1.49797	1.63726	1.78697	2.23632	1.55879
5.40905	3.60659	5.64857	4.30074	2.5016	5.29428	10.3446	2.1634	11.8527	2.75221	17.9171	3.7524	5.82765	2.26042	4.9644	4.88012	3.87105	4.79086	3.45467	4.62619		42.3436	6.32641	28.8372	6.08088	37.1668	5.17449	54.0235	8.07036	42.6786	5.99598	34.661	5.7298	50.095	8.4857	38.6446	7.3246	44.4662	5.50722	34.3122	9.30949		1.76911	1.48457	1.54603	1.49648	1.64002	1.79697	2.23781	1.55836
5.43178	3.63098	5.65966	4.30018	2.56481	5.29373	10.2969	2.2011	11.871	2.74999	17.7613	3.72912	5.79272	2.2632	4.9583	4.94388	3.86274	4.79419	3.45024	4.62952		42.456	6.32871	29.0207	6.09924	37.1439	5.1676	53.9317	8.22181	43.0687	5.9455	34.5991	5.80782	49.184	8.42833	38.3256	7.31771	44.4157	5.47968	34.2044	9.32555		1.77804	1.49712	1.56495	1.50605	1.64513	1.80037	2.24015	1.55879
5.47891	3.65981	5.66797	4.29908	2.6014	5.29096	10.252	2.25821	11.8965	2.74943	17.4286	3.69807	5.77165	2.2693	4.97438	4.96828	3.85054	4.79529	3.46077	4.63118		42.7452	6.31723	29.4407	6.10383	37.1691	5.17449	53.8537	8.44669	43.6171	5.91796	34.5348	5.89043	48.1881	8.37556	38.2017	7.30394	44.5212	5.46132	34.1608	9.32326		1.78484	1.49797	1.58346	1.51158	1.62939	1.79186	2.23802	1.56198
5.55819	3.66702	5.67019	4.31848	2.5637	5.27931	10.2432	2.33139	11.892	2.75165	16.9097	3.68088	5.77165	2.27928	4.99267	4.98935	3.85276	4.79474	3.50014	4.63118		43.1835	6.31265	29.6747	6.11071	37.4078	5.17908	53.7688	8.72435	43.9155	5.91337	34.4752	5.95697	47.7017	8.35261	38.2109	7.28788	44.5098	5.4705	34.4912	9.29343		1.78463	1.49414	1.58367	1.51009	1.61344	1.77953	2.23887	1.56113
5.60144	3.68033	5.66853	4.35008	2.53487	5.25769	10.2282	2.39682	11.9159	2.75442	16.4944	3.70971	5.77941	2.28371	5.0082	5.052	3.84832	4.80084	3.5262	4.63229		43.6126	6.30806	29.6403	6.12678	37.7382	5.18826	53.6609	8.94464	43.8994	5.91337	34.661	5.96386	47.9656	8.32966	38.2958	7.26952	44.5671	5.5141	34.8584	9.27966		1.78378	1.49967	1.58218	1.51732	1.61004	1.77804	2.23674	1.5624
5.62473	3.70029	5.63526	4.35119	2.54762	5.23551	10.1872	2.40846	11.9852	2.76163	16.4035	3.73577	5.80935	2.28427	4.9838	5.12186	3.85442	4.80749	3.53063	4.65669		43.7204	6.30806	29.56	6.14055	37.8529	5.2135	53.576	9.06166	43.865	5.91567	35.0764	5.96386	47.8875	8.29754	38.305	7.24428	44.8838	5.55311	34.9295	9.27507		1.78314	1.51158	1.58218	1.51647	1.61004	1.78463	2.22973	1.56538
5.66686	3.68864	5.60421	4.35341	2.59475	5.20058	10.1622	2.38517	12.0878	2.76052	16.3441	3.72247	5.82044	2.2826	5.0082	5.1529	3.91763	4.81525	3.53396	4.69272		43.6722	6.30347	29.5416	6.14743	37.8805	5.24103	53.5691	9.1328	43.8673	5.91567	35.3242	5.96156	46.9788	8.28607	38.2109	7.22593	45.0834	5.59212	34.9157	9.25901		1.77953	1.51774	1.5875	1.52731	1.61493	1.79441	2.23185	1.57091
5.72009	3.69197	5.59645	4.3462	2.65296	5.18284	10.1678	2.36244	12.1632	2.76108	15.8607	3.71692	5.81656	2.29924	5.0836	5.16011	4.0141	4.8208	3.53784	4.71102		43.7227	6.30806	29.5485	6.15431	38.0503	5.25021	53.5691	9.19246	43.7479	5.91567	35.4022	5.95927	45.6663	8.29065	38.0342	7.2374	45.1546	5.63801	34.8423	9.22918		1.76932	1.51796	1.58984	1.53476	1.62769	1.79697	2.22313	1.57112
5.75502	3.68643	5.60865	4.33733	2.68512	5.18617	10.1716	2.39127	12.1803	2.7633	15.4532	3.70417	5.81545	2.31587	5.11243	5.159	4.05845	4.82634	3.54172	4.72932		43.9958	6.36772	29.537	6.1589	38.6194	5.25939	53.5714	9.24065	43.6768	5.91796	35.4527	5.95697	44.099	8.2287	37.8506	7.281	45.1752	5.64949	34.8354	9.19705		1.77804	1.51583	1.58261	1.53476	1.63279	1.7925	2.19506	1.57112
5.76389	3.68643	5.61364	4.35119	2.68512	5.17785	10.2077	2.42731	12.1909	2.76052	15.4199	3.66425	5.80603	2.30811	5.12407	5.15623	4.06677	4.83078	3.55503	4.76314		44.5694	6.48704	29.5462	6.1612	38.8259	5.25939	53.576	9.27277	43.7273	5.91108	35.4206	5.95009	42.2587	8.12544	37.7979	7.33836	45.189	5.61965	34.8699	9.15575		1.78144	1.522	1.57644	1.53454	1.63577	1.7825	2.19506	1.5724
5.76333	3.69086	5.61087	4.36394	2.69787	5.16455	10.2919	2.41955	12.2175	2.77605	15.4094	3.58275	5.80492	2.30145	5.14958	5.15235	4.05346	4.84408	3.55336	4.7831		45.0582	6.61095	29.5439	6.16808	38.8764	5.24333	53.8422	9.27277	43.7502	5.90878	35.3426	5.95468	40.2623	8.0566	37.8851	7.3682	45.2647	5.59671	34.8653	9.10756		1.77868	1.5237	1.58388	1.53157	1.63471	1.76251	2.21122	1.57027
5.76444	3.73965	5.61142	4.37503	2.71728	5.14403	10.4339	2.42121	12.2192	2.80377	15.4088	3.48794	5.80492	2.29979	5.16288	5.15845	4.05124	4.85628	3.5578	4.78531		45.2441	6.71192	29.5508	6.18414	39.1907	5.19285	54.2805	9.27277	43.7502	5.91108	35.2232	5.96156	38.6813	8.02677	37.9516	7.35672	45.3703	5.56917	34.8859	9.05707		1.77187	1.52412	1.56538	1.53157	1.64172	1.71828	2.20846	1.57027
5.76167	3.87272	5.59978	4.43103	2.72615	5.1396	10.5764	2.42287	12.2125	2.80155	15.4227	3.44525	5.80325	2.29702	5.15124	5.17342	4.05069	4.87125	3.54948	4.78254		45.2854	6.7647	29.5715	6.19103	39.4271	5.14007	54.5306	9.27277	43.7479	5.91337	35.3288	5.9432	37.8277	8.02677	38.0067	7.35213	45.5011	5.53475	34.918	9.01118		1.77931	1.52391	1.55794	1.5305	1.6313	1.66278	2.20506	1.56432
5.75114	3.95755	5.58425	4.54913	2.72615	5.16621	10.669	2.43064	12.218	2.78048	15.4227	3.45467	5.80935	2.2632	5.15069	5.17231	4.04404	4.88179	3.53673	4.77367		45.267	6.7647	29.6311	6.18185	39.691	5.09188	54.7142	9.27736	43.7594	5.91337	35.7005	5.93402	37.5386	8.10938	38.0663	7.35443	45.6915	5.52328	34.9295	8.97447		1.78187	1.52327	1.56219	1.53667	1.61684	1.64938	2.20187	1.56219
5.75557	3.98915	5.58314	4.61566	2.72726	5.20613	10.7344	2.42343	12.2214	2.76884	15.4277	3.46687	5.81212	2.23381	5.15013	5.16732	4.02962	4.8962	3.51788	4.77644		45.2533	6.7647	30.1061	6.17497	40.0879	5.01616	54.962	9.27736	43.7548	5.91337	35.7281	5.93402	37.5638	8.24247	38.0962	7.34984	45.8246	5.53246	34.9272	8.94464		1.78399	1.52327	1.56666	1.54433	1.61599	1.65214	2.19549	1.56963
5.765	3.99081	5.5898	4.62287	2.75332	5.24328	10.7798	2.41567	12.2125	2.76052	15.4498	3.46355	5.80658	2.22771	5.13849	5.1712	4.02962	4.92004	3.5079	4.80084		45.267	6.77158	31.0836	6.17955	40.8199	4.97256	55.1479	9.2636	43.5598	5.91796	35.8497	5.92944	37.7313	8.30213	38.103	7.33836	45.843	5.54164	34.9341	8.88956		1.78399	1.52753	1.5707	1.54454	1.62003	1.63811	2.19804	1.57708
5.77054	4.00245	5.59756	4.63063	2.81209	5.26046	10.802	2.42398	12.2208	2.75442	15.4227	3.46355	5.77997	2.2194	5.12629	5.16954	4.03128	4.93058	3.54671	4.82745		45.2854	6.80141	31.8111	6.17955	41.887	4.9519	55.1571	9.22229	43.3441	5.91567	36.125	5.90878	37.9218	8.32049	38.1008	7.34984	45.8476	5.54164	34.9456	8.81154		1.8042	1.52753	1.56857	1.54092	1.62003	1.5741	2.1974	1.58601
5.77276	4.00578	5.61752	4.66334	2.8886	5.26046	10.8065	2.45004	12.2352	2.75442	15.4127	3.48406	5.74836	2.21053	5.12241	5.1712	4.03738	4.92891	3.61712	4.86515		45.2877	6.81977	32.3365	6.16349	42.4262	4.90601	55.1571	9.15345	43.3211	5.90419	36.2145	5.87895	37.9837	8.34573	38.2889	7.3659	45.8613	5.52787	34.9731	8.7427		1.81717	1.52519	1.56857	1.5405	1.61599	1.52859	2.19442	1.58899
5.77498	3.98804	5.6397	4.6772	2.98341	5.31979	10.812	2.45115	12.2513	2.7572	15.4448	3.49293	5.74559	2.23215	5.13572	5.18229	4.03683	4.93279	3.68975	4.95331		45.4208	6.84272	32.8437	6.13825	42.3528	4.81881	55.1548	9.10067	43.2018	5.8996	36.2122	5.85371	37.9745	8.35949	39.0553	7.3682	45.8017	5.50722	34.9616	8.66239		1.81377	1.52519	1.55326	1.54284	1.61238	1.51966	2.19442	1.58856
5.79272	3.95755	5.63803	4.67332	3.09817	5.41737	10.8636	2.45115	12.2868	2.76829	15.5103	3.48517	5.75502	2.23215	5.15346	5.17508	4.03794	4.94388	3.84888	5.09025		45.6869	6.87255	33.119	6.1176	42.2128	4.72244	55.1961	9.06166	43.2569	5.89731	36.483	5.84912	38.0388	8.3159	39.6955	7.3682	45.6112	5.49115	34.9341	8.57749		1.8144	1.51753	1.53922	1.54199	1.61131	1.51881	2.19868	1.58601
5.81102	3.94202	5.63803	4.67498	3.22736	5.4584	10.9462	2.45891	12.2862	2.77438	15.5934	3.48295	5.76333	2.23159	5.14403	5.19005	4.03517	4.95109	4.07509	5.24771		45.804	6.86337	33.1879	6.11071	42.1279	4.61918	55.2328	9.01118	43.4175	5.9019	37.0681	5.86518	38.2568	8.27918	39.9548	7.37278	45.4368	5.4728	35.0305	8.49029		1.81717	1.51434	1.5439	1.5354	1.61408	1.51434	2.19421	1.58175
5.80713	3.94479	5.60809	4.6833	3.36153	5.46394	11.0377	2.45947	12.3134	2.77383	15.6378	3.48184	5.77664	2.23049	5.07972	5.19781	4.03849	4.94887	4.25084	5.3902		45.742	6.84501	33.2315	6.11071	42.1302	4.53886	55.2007	8.96988	43.5621	5.90878	38.1168	5.87895	38.3325	8.28148	40.2004	7.37967	45.384	5.4705	34.9869	8.34343		1.82355	1.52604	1.5439	1.53986	1.61769	1.50222	2.16742	1.57282
5.79327	3.96531	5.57538	4.68995	3.48018	5.46339	11.1441	2.47388	12.4476	2.77882	15.6162	3.48739	5.78662	2.23104	5.03592	5.16732	4.03627	4.94998	4.38002	5.43566		45.6869	6.85189	33.3072	6.11071	42.3757	4.49297	55.3177	8.94005	43.7135	5.91567	40.2738	5.89731	38.344	8.34573	40.4367	7.38426	45.3886	5.52098	34.7643	8.12085		1.82355	1.52604	1.54092	1.54071	1.61684	1.48925	2.13297	1.56623
5.78662	4.00356	5.5399	4.6966	3.54117	5.46117	11.2289	2.50438	12.5263	2.78381	15.5763	3.514	5.78052	2.24047	5.04701	5.19171	4.02352	4.96495	4.44656	5.4279		45.6824	6.85419	33.3416	6.11071	42.6373	4.45625	55.4118	8.89645	43.7525	5.91567	42.5065	5.9432	38.3945	8.42375	40.5446	7.38426	45.3955	5.61736	34.4889	7.94416		1.82652	1.51753	1.5439	1.54071	1.61684	1.49542	2.10532	1.5624
5.78662	4.03517	5.51162	4.68552	3.56445	5.46671	11.2622	2.50715	12.5208	2.7827	15.4814	3.53119	5.77498	2.2388	5.04867	5.18672	4.03461	4.97881	4.46596	5.42846		45.6801	6.8496	33.3324	6.10842	42.7796	4.41495	55.4118	8.85055	43.6837	5.8996	43.3578	6.01434	38.4679	8.50865	40.5767	7.37508	45.4299	5.69308	34.3604	7.82484		1.81887	1.50966	1.54539	1.53837	1.61727	1.49435	2.07704	1.56623
5.79272	4.03627	5.53934	4.6833	3.5639	5.46948	11.2666	2.4944	12.4903	2.76829	15.3306	3.56057	5.77664	2.23936	5.04867	5.12407	4.05457	4.97105	4.47649	5.42402		45.6801	6.8496	33.3554	6.11301	42.9058	4.39889	55.3705	8.81843	43.6309	5.89502	43.4519	6.09006	38.718	8.58667	40.5056	7.37278	45.4162	5.74357	34.5302	7.75829		1.82312	1.50435	1.54539	1.53837	1.60855	1.4952	2.07534	1.56963
5.78718	4.10392	5.5155	4.70381	3.58663	5.46838	11.245	2.48996	12.4775	2.75664	15.1765	3.57665	5.78496	2.23714	5.04867	5.14015	4.06233	4.94721	4.48647	5.43566		45.6892	6.8496	33.3531	6.1153	42.892	4.38971	55.3406	8.7886	43.6194	5.8996	43.4428	6.15202	39.2091	8.58667	40.3656	7.37508	45.3496	5.79864	34.863	7.76517		1.82312	1.50435	1.54922	1.52072	1.60855	1.48627	2.05641	1.57793
5.76999	4.17433	5.4085	4.72599	3.61879	5.47004	11.2395	2.48996	12.4753	2.77272	15.0701	3.58164	5.81822	2.24435	5.04978	5.01319	4.06344	4.93945	4.50034	5.47669		45.6732	6.86107	33.5137	6.11301	42.7383	4.37824	55.3337	8.76565	43.8099	5.9019	43.624	6.21627	39.4546	8.56143	40.3472	7.39573	45.3244	5.84224	35.2599	7.79271		1.8295	1.51222	1.57197	1.50477	1.59877	1.47925	2.05343	1.59962
5.74005	4.20039	5.32367	4.75149	3.62378	5.46782	11.2323	2.48941	12.4542	2.7766	15.0279	3.58829	5.87256	2.30256	5.06364	4.90563	4.064	4.9339	4.51475	5.48556		45.5561	6.90926	33.5045	6.11301	42.674	4.36447	55.3567	8.76565	44.1128	5.9019	43.9843	6.25528	39.4523	8.54995	40.4023	7.42786	45.329	5.84683	35.6225	7.84778		1.83312	1.50094	1.60387	1.4918	1.5909	1.47904	2.04875	1.60345
5.68849	4.22478	5.31147	4.78809	3.62378	5.47558	11.2184	2.48774	12.4492	2.7766	15.0329	3.60548	5.90804	2.34913	5.07695	4.89232	4.064	4.93945	4.52584	5.48778		45.3198	6.97122	33.6445	6.10613	42.7314	4.35529	55.4141	8.76336	44.3124	5.89502	44.3193	6.25298	39.5303	8.51324	40.4689	7.4508	45.3359	5.83076	35.8267	7.9671		1.83886	1.49627	1.61493	1.47968	1.59047	1.47585	2.05322	1.59218
5.64579	4.2525	5.31092	4.79252	3.62378	5.48057	11.2367	2.4955	12.462	2.7766	15.0662	3.60437	5.8842	2.44671	5.10522	4.89232	4.06621	4.94222	4.53083	5.51218		45.0834	7.00564	33.9015	6.10383	43.2684	4.34841	55.4347	8.72894	44.4249	5.88584	44.4868	6.2461	39.5349	8.45128	40.5974	7.47146	45.2693	5.8147	35.8612	8.09331		1.858	1.50094	1.62344	1.48436	1.59792	1.46033	2.0647	1.59962
5.63692	4.26359	5.31036	4.77589	3.62322	5.46172	11.2594	2.50382	12.4504	2.78326	15.0972	3.58718	5.8282	2.60639	5.159	4.87125	4.05734	4.94333	4.53027	5.54655		44.9343	7.0194	34.1333	6.09006	43.9132	4.33693	55.4278	8.69911	44.2964	5.87436	44.4776	6.24381	39.551	8.42375	40.7098	7.50358	45.2372	5.81241	35.8359	8.18739		1.86565	1.51285	1.6279	1.51434	1.59728	1.45607	2.06938	1.6145
5.63692	4.26248	5.27987	4.77145	3.63209	5.42679	11.2361	2.50438	12.3506	2.79878	15.0834	3.57942	5.78329	2.65795	5.20835	4.86515	4.05845	4.94887	4.53471	5.57815		44.8769	7.02629	34.287	6.05564	44.1816	4.33234	55.4255	8.66239	43.702	5.86289	44.6337	6.23463	39.5625	8.40998	40.735	7.52653	45.251	5.8147	35.774	8.26541		1.86034	1.50881	1.62684	1.52051	1.59877	1.45458	2.06853	1.6145
5.63471	4.26636	5.18229	4.76813	3.63043	5.34418	11.1874	2.49717	12.2591	2.80044	15.0634	3.58607	5.76056	2.65962	5.22165	4.8707	4.06067	4.95663	4.53027	5.64912		44.8815	7.05383	34.3191	6.03499	44.2757	4.32546	55.1938	8.60961	43.1467	5.8583	44.6429	6.22086	39.8516	8.38244	40.7442	7.51964	45.3014	5.82159	35.6799	8.33655		1.8497	1.50775	1.61961	1.51881	1.60493	1.47181	2.07427	1.60727
5.63083	4.29131	5.10744	4.76813	3.63597	5.26268	11.153	2.49717	12.2474	2.79324	15.0678	3.59051	5.75391	2.6513	5.22553	4.88733	4.05623	4.96107	4.52584	5.74005		44.9136	7.15709	34.3191	6.03499	44.2941	4.32316	54.4893	8.56372	43.1146	5.8583	44.6383	6.21168	40.1155	8.34802	40.6639	7.46687	45.4093	5.83076	35.6684	8.38244		1.84099	1.522	1.62492	1.51966	1.60408	1.48776	2.0596	1.60727
5.63193	4.32125	5.08249	4.7709	3.62877	5.26046	11.1508	2.49606	12.2508	2.77549	14.9891	3.58607	5.75391	2.70952	5.2272	4.9084	4.06067	4.96052	4.52528	5.79383		44.9664	7.27641	34.3398	6.02811	44.3262	4.32546	53.3534	8.50635	43.5391	5.8606	45.5699	6.22774	39.9273	8.31819	40.4276	7.42097	45.4299	5.85371	35.7785	8.40998		1.83397	1.53412	1.62407	1.52093	1.60706	1.48755	2.03748	1.60749
5.65744	4.32403	5.07916	4.75926	3.65593	5.28652	11.1585	2.49828	12.258	2.76773	14.8921	3.58164	5.75668	2.73779	5.22609	4.91838	4.04847	4.95941	4.53194	5.83375		44.9779	7.3223	34.3352	6.02352	44.5075	4.32316	51.777	8.3985	44.0027	5.8583	46.7907	6.27364	39.4431	8.34573	40.1935	7.41638	45.3932	5.91567	36.2076	8.45128		1.83482	1.53476	1.62344	1.51689	1.61004	1.48818	2.0345	1.60749
5.72286	4.32403	5.0836	4.76813	3.70971	5.29761	11.1402	2.4883	12.2546	2.76829	14.8843	3.61601	5.75834	2.74999	5.23385	4.92281	4.04404	4.94998	4.54303	5.85482		44.9779	7.32919	34.6037	6.02352	44.8563	4.30481	50.0675	8.25853	44.1702	5.86518	47.0362	6.31265	39.0599	8.44669	40.0053	7.38196	45.3772	5.98451	37.0452	8.46275		1.81759	1.52604	1.62577	1.51285	1.60791	1.49265	2.03046	1.60408
5.79438	4.33179	5.09081	4.79585	3.7585	5.29207	11.0216	2.4944	12.274	2.77272	14.8915	3.64817	5.74836	2.80488	5.12407	4.92004	4.04736	4.94388	4.54136	5.85537		44.9802	7.33607	35.0764	6.02122	45.4919	4.2635	48.8674	8.12085	44.0761	5.87207	47.027	6.36542	38.8993	8.51553	39.8585	7.3246	45.3955	6.04187	38.0113	8.43751		1.80845	1.52604	1.61514	1.51115	1.60174	1.49414	2.02579	1.60217
5.83985	4.32735	5.10134	4.82024	3.80896	5.28874	10.7682	2.51824	12.248	2.77272	14.789	3.65482	5.74504	2.79656	4.94887	4.9461	4.05679	4.93612	4.5397	5.85426		44.854	7.35213	35.2967	6.00057	45.8682	4.22679	48.4979	7.99235	43.9338	5.87436	47.1028	6.45492	39.0622	8.51094	39.7919	7.29247	45.508	6.09006	38.757	8.41227		1.811	1.51689	1.61025	1.50966	1.59005	1.47245	2.02494	1.60004
5.86313	4.32236	5.11853	4.82856	3.84777	5.27211	10.5481	2.52045	12.0489	2.77328	14.5045	3.66092	5.74726	2.78714	4.87513	4.99766	4.07398	4.93058	4.5336	5.85426		44.6084	7.40491	35.3953	5.97533	45.7191	4.21073	48.5048	7.90515	43.9613	5.88125	47.2726	6.55359	39.4615	8.53159	39.7782	7.28559	45.625	6.1153	39.3881	8.36867		1.81632	1.50754	1.60642	1.50754	1.58622	1.46671	2.01643	1.60068
5.86757	4.32347	5.1396	4.8269	3.85331	5.26767	10.4361	2.53598	11.6636	2.77605	14.27	3.68643	5.77775	2.78825	4.84519	5.00931	4.10946	4.9339	4.53305	5.85426		44.574	7.52423	35.5238	5.95238	45.602	4.21531	48.6402	7.84319	44.0417	5.88813	47.3253	6.62931	39.7782	8.5706	39.7759	7.27411	45.742	6.13137	40.0329	8.26771		1.83524	1.50711	1.60387	1.49797	1.596	1.46564	1.99899	1.60749
5.8648	4.32403	5.17065	4.83078	3.85719	5.26712	10.4006	2.57257	11.3104	2.77993	14.2168	3.71138	5.82654	2.81319	4.81747	5.01041	4.15381	4.94499	4.53305	5.85371		44.8012	7.7101	35.5651	5.92944	45.5493	4.2199	48.5805	7.76747	43.9659	5.89731	47.2726	6.68897	39.9709	8.55913	39.73	7.28788	45.9095	6.13825	40.1591	8.12314		1.85481	1.50477	1.60536	1.49499	1.58899	1.46947	1.9941	1.62386
5.8526	4.3401	5.19559	4.82246	3.85996	5.26878	10.399	2.58754	11.2173	2.78603	14.214	3.72579	5.83818	2.83315	4.79585	5.0215	4.20759	4.94776	4.52806	5.84927		45.5653	7.87302	35.5674	5.88125	45.625	4.21531	47.6604	7.67568	43.7984	5.89731	47.4102	6.7624	40.0512	8.55913	39.6841	7.3223	45.9692	6.15202	40.1843	8.00152		1.86757	1.49223	1.60983	1.51881	1.59324	1.4699	1.99282	1.62514
5.80547	4.36394	5.18284	4.79585	3.83612	5.2771	10.41	2.5892	11.4485	2.78935	14.2179	3.7452	5.81323	2.83426	4.79807	5.02317	4.22312	4.94721	4.49756	5.84705		47.0683	7.99694	35.5904	5.76422	45.586	4.20843	46.2996	7.61143	43.7227	5.9019	47.4653	6.80371	40.3472	8.60502	39.6703	7.35443	45.9692	6.17497	41.4097	7.92121		1.88437	1.49095	1.60983	1.54177	1.59728	1.47883	1.98687	1.6262
5.74282	4.36561	5.15457	4.76369	3.81339	5.28042	10.4411	2.59475	11.7058	2.80432	14.2855	3.76072	5.76001	2.84757	4.81137	5.02427	4.18542	4.94832	4.48259	5.8526		48.9201	8.10708	35.6133	5.56229	45.0949	4.20384	45.2257	7.57701	43.7204	5.93173	47.3506	6.806	40.719	8.64174	39.6864	7.38885	46.0288	6.18414	43.6286	7.8409		1.89989	1.48733	1.60557	1.54305	1.62599	1.50647	1.97858	1.63364
5.67906	4.37226	5.10578	4.73153	3.80286	5.27987	10.4583	2.62801	11.7562	2.80155	14.3892	3.75906	5.66742	2.85367	4.8524	5.02926	4.17544	4.95941	4.48038	5.86202		50.4392	8.17363	35.6959	5.39937	44.3193	4.19696	44.5258	7.52882	43.7204	5.96156	47.2244	6.80141	40.8314	8.64174	39.9204	7.42556	45.5011	6.18644	45.9738	7.73993		1.89947	1.48989	1.56814	1.54092	1.63471	1.49861	1.97028	1.63662
5.57095	4.38723	5.07085	4.70825	3.79953	5.27931	10.4405	2.64964	11.7374	2.80155	14.4264	3.76571	5.60366	2.85311	4.91616	5.03259	4.17655	4.9522	4.4715	5.86313		51.3984	8.19887	35.79	5.2984	43.702	4.18089	44.1862	7.45539	43.8053	5.98221	47.4217	6.80141	40.6662	8.66239	40.4941	7.44163	44.1312	6.19562	47.2955	7.64356		1.89011	1.49435	1.55772	1.53752	1.63471	1.48627	1.96433	1.63641
5.46505	4.4083	5.08027	4.70326	3.80175	5.29539	10.4278	2.64465	11.7385	2.80488	14.4075	3.79454	5.57095	2.86143	4.96661	5.03259	4.17544	4.92836	4.4715	5.86313		51.9629	8.23099	35.8359	5.2112	43.1697	4.14647	43.982	7.4072	44.2642	6.02122	48.0986	6.79223	40.6272	8.74729	40.9347	7.44851	42.915	6.2048	47.5342	7.56783		1.86927	1.49435	1.559	1.52327	1.64172	1.48159	1.96433	1.6464
5.43677	4.43048	5.11576	4.70326	3.81173	5.30925	10.4222	2.65518	11.7329	2.8071	14.3809	3.84444	5.53435	2.86143	5.02206	5.04978	4.171	4.93557	4.47428	5.86369		52.1097	8.30442	35.8566	5.14007	42.8347	4.08222	43.8374	7.3682	44.87	6.08088	48.5002	6.74404	40.9897	8.85973	41.1068	7.4531	42.2725	6.21856	47.4791	7.52653		1.85226	1.49286	1.55943	1.51902	1.65214	1.4699	1.9639	1.64938
5.43178	4.42382	5.16787	4.70381	3.82504	5.30426	10.4261	2.66904	11.7035	2.80765	14.392	3.91097	5.48944	2.85533	5.09247	5.06641	4.17045	4.96218	4.46929	5.86812		52.1809	8.37556	35.8336	5.08958	42.9173	4.02945	43.624	7.30394	45.2533	6.14743	48.4796	6.71192	41.3431	8.93775	41.2123	7.43474	42.082	6.22086	47.3276	7.52194		1.83758	1.51455	1.56113	1.52306	1.63747	1.46841	1.96284	1.65151
5.42347	4.40442	5.21167	4.69771	3.84777	5.2832	10.4294	2.67348	11.683	2.8082	14.3598	3.98804	5.49665	2.85589	5.1468	5.07306	4.18154	4.9655	4.46929	5.86868		53.101	8.42604	35.7166	5.02533	43.1995	4.01109	43.445	7.25117	45.4942	6.19332	48.1583	6.73257	41.5542	8.97447	41.311	7.39573	42.105	6.19332	47.1257	7.538		1.81759	1.53008	1.56708	1.54624	1.61535	1.47713	1.94476	1.64066
5.42957	4.39943	5.2588	4.67276	3.89434	5.22886	10.4128	2.67791	11.6863	2.7888	14.2506	4.02241	5.546	2.86032	5.15734	5.00709	4.20538	4.93834	4.46208	5.86646		54.7119	8.45817	35.6294	4.9542	43.2064	4.00191	43.3601	7.21675	45.6433	6.23233	47.8095	6.75093	41.7814	8.95611	41.2881	7.37508	42.1394	6.17267	47.0087	7.55636		1.80781	1.52561	1.57219	1.56517	1.61259	1.49308	1.93923	1.62939
5.42957	4.39832	5.30537	4.59182	3.91485	5.23496	10.3363	2.67791	11.6686	2.75941	14.1735	4.0202	5.58869	2.96622	5.15235	4.88179	4.21425	4.90618	4.43935	5.85315		56.2723	8.50635	35.7464	4.9129	43.2087	3.9193	43.3165	7.17085	45.4299	6.26446	47.6604	6.75322	41.9558	8.93775	41.2605	7.35672	42.1945	6.15431	46.9903	7.5816		1.79505	1.52093	1.58112	1.56517	1.61046	1.49733	1.94094	1.63386
5.40406	4.39832	5.30537	4.53471	3.91153	5.24605	10.2177	2.68013	11.6021	2.72781	14.1536	4.03128	5.61364	3.14197	5.16344	4.85295	4.16768	4.8962	4.41495	5.83707		57.4471	8.59126	35.8061	4.88995	43.2408	3.79998	43.2684	7.1502	45.0674	6.30117	47.5869	6.74863	41.8961	8.98365	41.4257	7.34295	41.7883	6.12219	47.0179	7.62979		1.76188	1.52859	1.5809	1.55368	1.6077	1.50966	1.93753	1.653
5.37523	4.39998	5.29539	4.52861	3.89046	5.24272	10.1483	2.68678	11.5705	2.68956	14.1308	4.03128	5.62528	3.18799	5.17841	4.85295	4.08007	4.89565	4.40497	5.83818		58.2709	8.67157	35.8084	4.87159	43.5024	3.72884	43.25	7.17085	45.1408	6.32871	47.5755	6.74863	42.082	9.04101	41.49	7.34295	40.3977	6.11989	47.1464	7.7124		1.71743	1.52072	1.58962	1.54773	1.6077	1.5707	1.93881	1.66108
5.35804	4.39943	5.26712	4.52528	3.91042	5.24494	10.109	2.68956	11.5721	2.65463	14.0815	4.0274	5.61863	3.18855	5.1834	4.85018	4.02131	4.89232	4.40996	5.84983		58.8239	8.68763	35.8359	4.84635	43.6906	3.68066	43.2821	7.20757	45.5332	6.33789	47.6191	6.75322	42.7842	9.08691	41.272	7.34295	38.6767	6.15431	47.0775	7.795		1.67809	1.52093	1.58962	1.54539	1.60812	1.63279	1.93541	1.65704
5.34141	4.40331	5.21833	4.52473	4.04958	5.25547	10.0685	2.68346	11.5699	2.64465	14.0554	4.00689	5.58702	3.18744	5.18506	4.86183	3.97861	4.85462	4.42715	5.84705		59.0488	8.68075	35.7762	4.80275	43.429	3.65541	43.3349	7.24199	46.1826	6.36772	47.6191	6.75093	43.468	9.12362	41.3753	7.33148	37.0429	6.1589	46.9972	7.83631		1.65704	1.52242	1.5926	1.54263	1.61089	1.67426	1.93519	1.63194
5.33143	4.39388	5.20114	4.52362	4.11168	5.24161	10.0469	2.67126	11.5439	2.64021	14.0516	3.96309	5.55875	3.18744	5.18617	4.8707	3.93537	4.82801	4.44046	5.85703		59.0075	8.6601	35.5835	4.75227	43.4611	3.64624	43.2867	7.26494	46.9352	6.39755	47.8325	6.73716	43.8489	9.15804	41.7585	7.31312	35.6317	6.14743	46.9077	7.83172		1.653	1.52859	1.60408	1.54177	1.60876	1.73466	1.93477	1.61408
5.33587	4.38113	5.21389	4.52196	4.11722	5.17453	10.0391	2.67348	11.4673	2.63245	14.0516	3.94701	5.54433	3.18633	5.1834	4.86848	3.92372	4.8269	4.4704	5.87644		58.8859	8.53618	35.5537	4.70179	43.8489	3.63706	43.1582	7.28788	47.1349	6.39066	48.0619	6.73487	43.9797	9.20164	42.1692	7.30853	35.5376	6.12678	46.9674	7.82484		1.63364	1.5271	1.6211	1.54794	1.60026	1.79952	1.93392	1.60898
5.34086	4.39333	5.23995	4.51641	4.13496	5.12463	10.0369	2.68678	11.4247	2.63079	14.0377	3.95256	5.52825	3.16914	5.1834	4.8707	3.92372	4.82911	4.53138	5.87311		58.8194	8.32278	35.5996	4.64901	43.8879	3.63935	42.9609	7.31542	46.9421	6.38378	48.0573	6.7624	43.9774	9.19705	42.9264	7.30165	37.0521	6.13137	47.0637	7.82025		1.59855	1.5186	1.61302	1.54454	1.59069	1.8329	1.93179	1.60068
5.34307	4.40553	5.26878	4.51697	4.14827	5.11742	10.0397	2.68457	11.3953	2.6319	13.9895	3.96032	5.52659	3.15528	5.18728	4.85905	3.91873	4.84242	4.59625	5.85703		58.7941	8.23329	35.8359	4.60541	43.8948	3.64624	42.8094	7.34066	46.715	6.39984	48.039	6.80371	43.8856	9.18558	43.9636	7.30624	38.7226	6.14513	47.0431	7.81566		1.58792	1.50817	1.61854	1.53922	1.59409	1.87416	1.91839	1.60111
5.34363	4.41883	5.27377	4.5142	4.14217	5.12962	10.0275	2.6768	11.2894	2.63134	13.8536	3.96032	5.53713	3.14752	5.18783	4.83854	3.91208	4.85794	4.64393	5.85149		58.7551	8.21952	36.1939	4.56869	43.943	3.66	42.7865	7.37278	46.4304	6.42738	48.0505	6.8473	43.6883	9.1764	44.2987	7.34754	39.6795	6.14972	47.5778	7.81795		1.59175	1.50775	1.61642	1.5405	1.59515	1.91563	1.9488	1.59132
5.35139	4.4277	5.27432	4.51142	4.13829	5.159	10.0153	2.6768	11.1308	2.6319	13.5187	3.95865	5.55043	3.14419	5.19726	4.83521	3.92761	4.87181	4.67221	5.82266		58.6977	8.20346	36.4256	4.52051	44.0807	3.69672	42.7911	7.39573	46.1138	6.44803	48.0321	6.87255	43.3578	9.1741	44.1931	7.43015	40.1063	6.15431	48.9385	7.81566		1.60281	1.5018	1.61387	1.53858	1.596	1.93073	1.97454	1.59877
5.37357	4.43491	5.28209	4.49479	4.13441	5.1712	10.023	2.67902	11.0316	2.63245	12.9427	3.9581	5.53435	3.17469	5.22775	4.83577	3.94978	4.88955	4.67609	5.7029		58.6748	8.18969	36.3981	4.47232	44.2941	3.72196	42.8989	7.4072	45.8315	6.4595	48.0482	6.87943	42.8806	9.18099	44.3629	7.48981	40.1797	6.16808	49.978	7.81566		1.61004	1.49542	1.61323	1.53858	1.60727	1.92137	1.98304	1.60026
5.41404	4.43768	5.28486	4.47539	4.13718	5.03592	9.98756	2.69732	10.9983	2.65296	12.4725	3.96198	5.48057	3.19021	5.28264	4.83133	3.95699	4.88234	4.65059	5.56873		58.8377	8.1828	36.3316	4.44478	44.6084	3.72884	43.0045	7.41409	45.7328	6.45721	48.0734	6.8932	42.6717	9.18099	44.4203	7.50588	40.3266	6.17955	50.375	7.81566		1.62152	1.48861	1.61046	1.53965	1.59558	1.92265	1.989	1.59707
5.48501	4.43824	5.28874	4.48315	4.14383	4.97659	9.83454	2.72559	11.0282	2.65296	12.3068	3.95089	5.45729	3.18633	5.40905	4.82579	3.9337	4.86404	4.6079	5.51384		59.3884	8.16674	36.3247	4.40577	45.3772	3.73802	43.0068	7.41409	45.8177	6.47327	48.0665	6.92762	42.775	9.18787	44.3652	7.50358	41.8066	6.17955	50.5103	7.81566		1.64491	1.48861	1.61174	1.53454	1.5875	1.92754	1.99431	1.596
5.58702	4.43879	5.29207	4.49756	4.14439	4.9838	9.67597	2.74611	11.0033	2.64797	12.3007	3.9459	5.47946	3.17469	5.57538	4.82967	3.88935	4.86515	4.5835	5.51218		59.8359	8.1438	36.2627	4.35529	46.6966	3.7472	43.0251	7.41638	45.7856	6.48245	47.922	6.98269	42.9448	9.21082	44.2734	7.4944	43.9361	6.18185	50.5539	7.82713		1.66342	1.485	1.61025	1.52902	1.58771	1.91861	1.99453	1.59154
5.66187	4.4277	5.29262	4.49701	4.14273	4.99489	9.53348	2.75664	10.8541	2.65906	12.3611	3.94202	5.50552	3.16859	5.71898	4.82135	3.87493	4.87181	4.57851	5.50275		59.8979	8.12544	36.2122	4.32546	47.9931	3.7495	43.1284	7.38655	45.7191	6.48016	47.5548	7.01252	43.032	9.26589	44.1748	7.4967	45.3336	6.18873	50.5562	7.8386		1.66767	1.48478	1.61068	1.52944	1.58707	1.93498	1.99453	1.59154
5.71843	4.40774	5.31369	4.48537	4.14328	4.99212	9.35606	2.77217	10.7089	2.66682	12.4066	3.97529	5.5216	3.19021	5.84705	4.83189	3.86884	4.9217	4.57851	5.49388		59.8405	8.12314	36.0998	4.29333	48.9546	3.75409	43.2362	7.36131	45.7282	6.47786	47.0408	7.01711	43.0687	9.33014	44.161	7.56095	46.1482	6.21627	50.5769	7.85926		1.67596	1.48818	1.61025	1.5271	1.58261	1.95327	2.00431	1.59473
5.81711	4.41329	5.34751	4.48537	4.14328	4.99544	9.18751	2.79712	10.5608	2.65296	12.4016	4.04625	5.54932	3.19963	5.94075	4.82856	3.84666	5.01374	4.58073	5.48723		59.8313	8.12314	35.9506	4.26121	49.6567	3.75409	43.25	7.35443	45.7535	6.47557	46.6002	7.01711	42.97	9.34161	44.1266	7.67109	46.5865	6.28281	50.609	7.8845		1.6934	1.49308	1.61174	1.52774	1.57516	1.95391	2.01494	1.59473
5.92246	4.42549	5.40905	4.48814	4.14383	5.01762	9.06887	2.80488	10.3058	2.64797	12.3661	4.05734	5.61641	3.19575	5.9962	4.82191	3.83113	5.06309	4.59182	5.42402		59.8382	8.11855	35.9644	4.23826	50.2052	3.75179	43.3028	7.35672	45.7741	6.4595	46.3891	7.02399	42.8668	9.30719	43.787	7.76288	46.4855	6.37919	50.6366	7.8845		1.70169	1.49201	1.61131	1.53221	1.55283	1.95837	2.01494	1.60089
5.9779	4.4266	5.4839	4.49368	4.14383	5.03037	8.93081	2.8143	10.0269	2.67403	12.345	4.0579	5.66908	3.20851	6.04111	4.8147	3.8583	5.08637	4.6018	5.22332		59.8405	8.10479	36.1755	4.20384	50.3382	3.74491	43.3395	7.3659	45.703	6.44115	46.3363	7.08136	43.094	9.26589	43.3877	7.78583	46.0495	6.42738	50.5998	7.86384		1.70935	1.4952	1.61174	1.53454	1.54177	1.96454	2.02685	1.60472
6.01394	4.41606	5.54821	4.50588	4.1455	5.02982	8.72456	2.8143	9.92824	2.67958	12.3478	4.05956	5.69957	3.20851	6.06661	4.80583	3.87383	5.10245	4.62675	5.04756		59.9116	8.08643	36.5358	4.13959	50.5471	3.7495	42.9953	7.37508	45.5263	6.42508	46.3294	7.16856	43.3624	9.22688	43.5735	7.78353	45.9485	6.43197	50.4048	7.86384		1.73381	1.49499	1.6094	1.53072	1.54496	1.95667	2.03514	1.60047
6.04388	4.38612	5.63249	4.51198	4.1455	5.0337	8.57986	2.82539	9.91881	2.67625	12.3605	4.05845	5.71454	3.19742	6.04166	4.80583	3.85109	5.11576	4.69605	4.97271		60.0218	8.07266	37.059	4.07763	51.7173	3.77015	42.8117	7.39803	45.4368	6.41591	46.4832	7.24199	43.4909	9.19476	43.9705	7.78353	46.2193	6.42279	50.1914	7.8845		1.74742	1.48648	1.61302	1.52604	1.5439	1.95008	2.04174	1.60089
6.04277	4.38723	5.69237	4.51586	4.14661	5.04146	8.54936	2.86198	9.91327	2.68956	12.2818	4.05457	5.7151	3.1952	5.98012	4.79419	3.84389	5.11687	4.76092	4.92115		60.0218	8.06578	37.7749	4.04092	52.7912	3.77015	42.8209	7.43474	45.407	6.39984	46.731	7.30624	43.4496	9.16034	44.2275	7.78124	46.5589	6.40214	50.1455	7.89826		1.75124	1.48648	1.62131	1.52689	1.5203	1.96007	2.05896	1.59941
6.07215	4.39666	5.69902	4.50255	4.15326	5.04146	8.54936	2.8642	9.88887	2.69399	12.0706	4.0518	5.71344	3.22847	5.93244	4.79086	3.86218	5.11188	4.80583	4.88567		59.9598	8.07495	38.4128	4.02256	53.8376	3.75638	42.8943	7.45539	45.3198	6.36772	46.7218	7.36131	43.1651	9.12591	44.3721	7.77665	46.793	6.37231	50.157	7.88679		1.77145	1.48882	1.62301	1.52902	1.51349	1.98177	2.07385	1.59898
6.04499	4.3961	5.68959	4.50311	4.15381	5.03869	8.55269	2.86476	9.87279	2.69787	12.0223	4.04625	5.70789	3.27836	5.91414	4.79086	3.89822	5.10855	4.83577	4.88289		59.7258	8.09561	38.5069	4.01338	55.1708	3.70819	43.1399	7.47834	45.2854	6.31953	47.3575	7.37967	43.133	9.08461	44.3767	7.73993	46.9192	6.34477	50.1822	7.85008		1.80824	1.475	1.60812	1.52668	1.51349	1.99282	2.08831	1.60174
6.00396	4.39499	5.64968	4.47317	4.1516	5.03093	8.56821	2.87474	9.89774	2.78991	12.0639	4.04016	5.69902	3.29999	5.89695	4.78975	3.91485	5.1019	4.83743	4.88234		59.4481	8.12544	38.539	3.99962	55.8753	3.66459	43.5299	7.52653	45.4024	6.28281	48.0046	7.38426	43.1559	9.02724	44.1862	7.65732	47.0064	6.32871	50.3405	7.82713		1.81377	1.45522	1.60387	1.49052	1.50966	1.99261	2.09979	1.6026
5.99342	4.38335	5.58592	4.4643	4.14328	5.0276	8.5854	2.88139	9.90717	2.96954	12.0961	4.03905	5.69126	3.31607	5.87478	4.78864	3.90986	5.07417	4.82024	4.87957		59.3609	8.17822	38.9039	3.98126	56.0382	3.64394	44.0141	7.56554	45.4001	6.26446	48.0688	7.38196	43.1766	8.99971	44.0508	7.56554	47.1188	6.34707	50.632	7.81566		1.81291	1.45756	1.61706	1.48946	1.5052	1.99857	2.11127	1.6128
5.97901	4.37559	5.51162	4.46652	4.13995	5.01762	8.59039	2.88416	9.90939	3.13865	12.1216	4.04293	5.6652	3.34102	5.84096	4.78753	3.90432	5.02871	4.78975	4.87901		59.533	8.23558	39.2228	3.95831	56.1552	3.6187	44.3239	7.57701	45.4047	6.25757	47.961	7.37967	43.2844	9.002	44.6291	7.53571	47.2037	6.47098	50.6274	7.81566		1.81738	1.45501	1.61621	1.485	1.5018	2.03918	2.12191	1.64874
5.96515	4.38058	5.42402	4.46873	4.14106	4.98214	8.63086	2.91077	9.94764	3.21128	12.1271	4.03794	5.60366	3.35155	5.79937	4.7842	3.90432	4.98879	4.76924	4.87846		59.9185	8.27459	39.3766	3.93766	56.2241	3.60952	44.2734	7.59766	45.4001	6.24839	47.977	7.38885	43.5483	9.002	45.5378	7.50588	47.1945	6.66603	50.4415	7.82484		1.81759	1.43438	1.61621	1.48585	1.49074	2.06598	2.12276	1.67022
5.96182	4.38002	5.3403	4.47927	4.13552	4.91339	8.69019	2.94293	9.9992	3.23845	12.0822	4.02629	5.52105	3.35155	5.76777	4.79696	3.90654	4.95164	4.77755	4.8779		60.1296	8.28836	39.9457	3.9216	56.2356	3.63017	44.0371	7.63897	45.4116	6.24151	47.9931	7.39803	43.7479	8.99971	45.9256	7.41179	47.2794	6.79223	50.4163	7.85696		1.81759	1.42141	1.62025	1.49031	1.48606	2.08639	2.12276	1.66597
5.96792	4.39167	5.29428	4.47372	4.13219	4.85351	8.7168	2.96456	10.0269	3.24898	12.0634	4.02352	5.41848	3.35155	5.75724	4.82246	3.91153	4.9206	4.77644	4.87846		60.1663	8.28836	40.6685	3.91012	56.3434	3.65312	43.6814	7.64585	45.4185	6.23692	48.0023	7.39344	43.6676	9.0043	46.022	7.26952	47.447	6.85878	50.6572	7.89826		1.81802	1.41822	1.62173	1.48989	1.47819	2.15615	2.1234	1.65576
5.97291	4.40109	5.27377	4.47261	4.13164	4.79252	8.71403	2.97842	9.99089	3.25341	12.0634	4.01964	5.33531	3.3521	5.74282	4.82911	3.9143	4.91561	4.74817	4.88179		60.1549	8.29065	40.7488	3.90553	56.4214	3.65541	43.5735	7.64126	45.4024	6.23004	48.0046	7.38885	43.6401	8.98594	46.0633	7.1502	47.6191	6.90697	50.6503	7.90744		1.82695	1.41822	1.62173	1.48712	1.475	2.21271	2.1268	1.65767
5.98511	4.40165	5.26102	4.47428	4.13496	4.69217	8.6985	2.97731	9.93101	3.25674	12.065	4.01687	5.30426	3.34933	5.75335	4.8269	3.92871	4.93002	4.72488	4.88733		60.1526	8.29065	40.6754	3.91242	56.4719	3.64165	43.5644	7.64126	45.3955	6.20939	48.039	7.38655	43.6952	8.92169	46.0702	7.09972	47.798	6.91385	50.8913	7.86843		1.82482	1.43098	1.62088	1.48648	1.475	2.22462	2.11872	1.65938
6.0023	4.39943	5.25547	4.47594	4.14716	4.59403	8.69462	2.96234	9.92935	3.25452	12.0556	4.03018	5.2904	3.34933	5.83818	4.83189	3.94258	4.93557	4.71268	4.89343		60.1549	8.29065	40.579	3.9216	56.5201	3.62099	43.5162	7.62061	45.446	6.19332	48.1239	7.38885	43.8122	8.87809	46.1023	7.09283	47.7544	6.89549	51.0542	7.81107		1.82355	1.46054	1.62046	1.485	1.47521	2.23206	2.11574	1.66958
6.01616	4.39887	5.26434	4.48647	4.16823	4.57019	8.6852	2.9579	9.90495	3.25397	12.0656	4.06788	5.28375	3.34878	5.96847	4.86293	3.92927	4.9217	4.73043	4.88456		60.1526	8.28607	40.4115	3.92389	56.4742	3.59805	43.608	7.57472	45.2624	6.18873	48.1262	7.40262	44.122	8.86891	46.1918	7.1066	47.7751	6.88861	51.0611	7.79959		1.82355	1.46075	1.61663	1.48436	1.47543	2.23313	2.11808	1.69361
6.02447	4.39388	5.32422	4.53027	4.18597	4.57075	8.6475	2.94848	9.83731	3.26949	12.0678	4.09782	5.28763	3.34933	6.04665	4.8768	3.89878	4.83355	4.75926	4.86682		60.304	8.28607	40.1132	3.91012	56.5178	3.58428	43.787	7.54718	45.088	6.18873	48.078	7.42786	44.3927	8.85973	46.1298	7.12725	47.8692	6.87943	51.0771	7.81566		1.8244	1.46437	1.61259	1.49393	1.47543	2.23355	2.11213	1.68638
6.00396	4.36561	5.38965	4.57962	4.18819	4.56465	8.60758	2.9324	9.77411	3.30498	12.0866	4.10114	5.28486	3.33381	6.07881	4.88179	3.88159	4.71546	4.7892	4.86238		60.3751	8.28607	39.5303	3.90783	56.6853	3.57051	43.842	7.5403	44.9825	6.18185	48.0596	7.46457	44.457	8.85285	46.7448	7.12496	47.8371	6.8473	51.084	7.84319		1.83801	1.46352	1.61472	1.51774	1.47543	2.23355	2.10894	1.6766
5.9718	4.34898	5.4157	4.57019	4.18375	4.52307	8.59261	2.9518	9.78464	3.32771	12.141	4.09671	5.28486	3.32216	6.09655	4.90895	3.87549	4.68385	4.82801	4.86737		60.1319	8.25853	38.8259	3.90324	56.8	3.56592	43.8053	7.5403	44.8815	6.16808	48.078	7.49211	44.4409	8.85973	48.8421	7.11808	47.7682	6.79912	51.084	7.89826		1.84694	1.46883	1.60855	1.52923	1.47564	2.23887	2.10894	1.68043
5.99342	4.34509	5.40517	4.58017	4.18209	4.3645	8.66746	2.96345	9.7985	3.32106	12.1293	4.09671	5.28375	3.3205	6.09821	4.94499	3.86939	4.68385	4.84852	4.85794		59.5491	8.24247	38.3853	3.89635	56.8712	3.57281	43.8374	7.54259	44.8517	6.14743	48.1032	7.49211	44.597	8.86662	51.1827	7.11808	47.6718	6.78076	51.0978	7.94875		1.84354	1.46756	1.60855	1.53029	1.47585	2.24929	2.10404	1.68128
6.07659	4.34565	5.37634	4.5774	4.18209	4.16102	8.81272	2.96123	9.79961	3.32993	12.0362	4.09671	5.28708	3.32327	6.09821	4.98491	3.87383	4.68385	4.85961	4.83521		59.276	8.26082	38.1834	3.89177	57.0915	3.57281	43.5942	7.5403	44.8654	6.11301	48.1537	7.49211	44.8976	8.85973	52.3667	7.11578	47.5778	6.806	51.123	7.98087		1.83716	1.47394	1.61302	1.52859	1.4767	2.2646	2.10489	1.68234
6.20688	4.34565	5.3342	4.52251	4.18209	4.10669	8.97295	2.97232	9.79074	3.34656	11.8909	4.09005	5.30094	3.31551	6.10376	5.01596	3.92095	4.68385	4.88068	4.82579		59.2806	8.29065	38.1306	3.89406	57.5045	3.56822	42.8737	7.52882	44.8792	6.05794	48.1124	7.49211	45.0421	8.86891	52.2291	7.11578	47.5433	6.83124	51.1391	8.00152		1.83716	1.47798	1.62301	1.52859	1.47415	2.27162	2.07874	1.67724
6.39206	4.35175	5.30426	4.49645	4.18653	4.10724	9.10324	3.02055	9.66211	3.36319	11.7146	4.09338	5.32422	3.31884	6.11152	5.02039	3.97584	4.68496	4.89786	4.82302		59.2553	8.33425	38.1902	3.89177	58.3122	3.55674	42.1738	7.52653	44.8746	5.98451	48.1078	7.50129	44.9412	8.8735	51.7426	7.11808	47.6168	6.8496	51.1368	8.0107		1.83695	1.47436	1.62344	1.52561	1.47372	2.26354	2.06662	1.66873
6.60774	4.35785	5.29484	4.49535	4.18375	4.10336	9.19029	3.08099	9.48136	3.38038	11.4873	4.11611	5.34474	3.32216	6.10376	5.01263	4.008	4.68884	4.89842	4.82191		59.2255	8.39162	38.3027	3.90553	58.7023	3.52691	41.8571	7.52653	44.8815	5.92485	48.1101	7.50588	44.5442	8.88268	51.3686	7.12037	47.6259	6.8496	51.1712	8.0107		1.83376	1.47245	1.62322	1.51753	1.47798	2.25482	2.06598	1.67235
6.77407	4.36117	5.3026	4.49645	4.18154	4.10502	9.25183	3.11647	9.3921	3.38981	11.1291	4.14383	5.34695	3.32383	6.1093	5.00154	4.01521	4.68829	4.89731	4.81858		59.1888	8.43751	38.4518	3.90783	58.6931	3.50856	41.9489	7.52423	44.9113	5.86518	48.1124	7.52194	43.8902	8.88039	51.0909	7.12037	47.7499	6.83583	51.6623	8.01529		1.83567	1.47117	1.62535	1.50966	1.48117	2.25312	2.06534	1.6715
6.90048	4.3523	5.32977	4.49923	4.17987	4.10891	9.29785	3.13199	9.32668	3.39646	10.8159	4.17932	5.34529	3.32882	6.1215	5.01041	4.01132	4.66334	4.8962	4.80139		59.0419	8.45817	38.5803	3.90783	58.5876	3.51314	41.9696	7.54259	44.971	5.80323	48.1331	7.52653	43.1995	8.8758	51.9399	7.12037	47.8967	6.82206	52.7935	8.00841		1.83567	1.46075	1.63258	1.51328	1.4733	2.25588	2.06491	1.67107
6.9842	4.32846	5.35305	4.44157	4.17211	4.10946	9.34054	3.1331	9.25904	3.41475	10.7216	4.23365	5.35084	3.32826	6.11762	5.04978	4.00079	4.6018	4.8962	4.8025		58.7689	8.49029	38.679	3.90553	58.5325	3.54068	41.9374	7.55865	44.9939	5.75504	48.0986	7.52882	42.915	8.87121	53.576	7.11578	47.8829	6.81747	53.856	7.98317		1.83822	1.46182	1.63258	1.51945	1.47287	2.25205	2.07534	1.66873
6.97477	4.32902	5.37135	4.33622	4.16102	4.10059	9.35717	3.13587	9.2291	3.43028	10.7216	4.27912	5.35527	3.32715	6.11374	5.10522	4.01132	4.5774	4.89786	4.80472		58.8148	8.55225	38.8006	3.89865	58.5073	3.59116	41.9466	7.57701	44.7805	5.70226	48.0872	7.53571	43.0527	8.85973	54.6866	7.12037	47.8393	6.81747	54.9138	7.95334		1.83609	1.46628	1.63045	1.50732	1.48095	2.2327	2.08597	1.6649
6.88662	4.33234	5.37135	4.30351	4.16158	4.02352	9.35773	3.13698	9.2424	3.43638	10.7333	4.29852	5.35305	3.33492	6.11595	5.16067	4.01465	4.56299	4.89676	4.80028		59.0419	8.57519	38.8259	3.88259	58.6312	3.6187	41.6759	7.59996	44.675	5.62654	48.0986	7.53341	43.2707	8.86662	55.4921	7.1525	47.821	6.82206	55.7238	7.93039		1.83248	1.46649	1.6145	1.50732	1.49201	2.21845	2.08108	1.65448
6.82286	4.33123	5.37967	4.29852	4.17766	3.93315	9.35773	3.14086	9.31282	3.46077	10.6856	4.29908	5.34973	3.3449	6.15476	5.21555	4.0141	4.45376	4.8962	4.80472		59.1567	8.57519	38.7823	3.86423	58.7	3.62099	41.2169	7.61143	44.753	5.54393	48.0092	7.54489	43.5162	8.87121	56.2011	7.17315	47.8623	6.82665	55.9923	7.90515		1.82886	1.46734	1.6111	1.50498	1.48755	2.21526	2.08831	1.64045
6.80456	4.32014	5.38299	4.28189	4.19761	3.87438	9.35384	3.17857	9.40042	3.49847	10.7327	4.2952	5.3525	3.3449	6.22961	5.26268	4.01354	4.38335	4.89398	4.81414		59.2691	8.59355	38.78	3.85735	58.6197	3.6187	40.9576	7.61602	44.6475	5.47738	47.9954	7.56095	43.6126	8.88039	56.8712	7.17315	47.9816	6.83124	56.0267	7.87761		1.82738	1.45841	1.61068	1.50605	1.47585	2.2176	2.08044	1.62599
6.80123	4.24807	5.37689	4.28244	4.19817	3.81894	9.34608	3.33214	9.34497	3.51788	10.8103	4.29908	5.3464	3.36097	6.27896	5.27543	4.01132	4.37614	4.89454	4.83244		59.2668	8.61191	39.2297	3.89635	58.6931	3.6164	40.8406	7.62061	44.4272	5.39937	48.3212	7.57242	43.6217	8.88268	57.6376	7.17085	48.1101	6.83583	55.9694	7.86384		1.82652	1.45395	1.6111	1.51541	1.46118	2.23696	2.08703	1.62259
6.809	4.22256	5.3719	4.27745	4.18653	3.78401	9.33721	3.53618	9.25626	3.58829	10.7993	4.30296	5.34086	3.36985	6.31167	5.26989	4.01132	4.37503	4.89398	4.86183		59.1613	8.61191	40.3404	3.92619	58.8217	3.61182	40.992	7.60684	44.2895	5.30069	48.5874	7.56554	43.6332	8.85285	58.2342	7.19609	48.0046	6.84042	55.9235	7.85926		1.82015	1.4531	1.61174	1.50243	1.45948	2.24759	2.08469	1.62259
6.83395	4.22478	5.33864	4.28133	4.18154	3.78234	9.30339	3.70583	9.26458	3.8023	10.7133	4.30573	5.37967	3.36985	6.34993	5.25991	4.01521	4.36727	4.89454	4.89066		59.2163	8.6142	41.0311	3.93307	58.941	3.62788	40.3289	7.54947	44.2321	5.2135	48.7113	7.59996	43.4129	8.76795	58.3788	7.22822	47.8279	6.8496	56.068	7.86384		1.82248	1.44353	1.61131	1.48329	1.43949	2.24461	2.08682	1.6194
6.8223	4.23254	5.2527	4.28133	4.18264	3.78234	9.19805	3.91153	9.27955	4.0457	10.6468	4.30684	5.45507	3.37262	6.38874	5.25547	4.01465	4.37448	4.89287	4.90895		59.3907	8.60961	41.0265	3.94684	59.0259	3.67607	38.7478	7.48063	44.2436	5.14925	48.7572	7.71699	43.3395	8.69222	58.3811	7.25117	47.6305	6.87255	56.169	7.87302		1.83142	1.43396	1.61089	1.48223	1.45033	2.24057	2.08405	1.61195
6.69146	4.23365	5.16399	4.29963	4.18098	3.7829	9.11544	4.10835	9.28343	4.21425	10.598	4.30185	5.50164	3.38592	6.40759	5.27432	3.99303	4.32292	4.88068	4.93945		59.5032	8.58208	41.0058	3.93766	58.9915	3.7059	37.8254	7.45539	43.9751	5.10565	48.8238	7.80189	43.3877	8.62109	58.3604	7.26723	47.4286	6.89549	56.1897	7.90744		1.83099	1.43077	1.61195	1.48032	1.46628	2.23908	2.09192	1.62301
6.58611	4.23088	5.1152	4.31848	4.18098	3.80175	9.08106	4.21203	9.28399	4.31959	10.5564	4.29908	5.52437	3.40311	6.40648	5.28597	3.97861	4.25306	4.87347	4.95885		59.673	8.54077	41.4074	3.90324	58.9226	3.73802	37.4514	7.47146	43.0618	5.05746	48.732	7.85926	43.4588	8.57978	58.3421	7.27411	47.4676	6.91614	56.2883	7.96481		1.82929	1.438	1.61259	1.48095	1.48202	2.23759	2.10085	1.63981
6.55562	4.23088	5.06697	4.32624	4.17821	3.82226	9.04946	4.26082	9.30228	4.36173	10.5381	4.29852	5.46117	3.40034	6.41258	5.27599	3.96143	4.23254	4.86183	4.97327		60.1021	8.49488	42.2908	3.88259	58.8882	3.7908	37.3091	7.4944	42.2862	5.01845	48.7687	7.91892	43.5162	8.57978	58.3696	7.23052	47.486	6.91156	56.6096	8.00841		1.83801	1.43715	1.61684	1.48266	1.48648	2.23611	2.08852	1.64258
6.52291	4.2392	5.00653	4.32403	4.17821	3.8328	9.05168	4.27357	9.32612	4.36117	10.5315	4.28577	5.34585	3.40034	6.41978	5.27432	3.96752	4.22035	4.82191	4.97327		60.5059	8.45587	43.0504	3.8757	58.9433	3.82751	37.3252	7.50129	42.0132	4.98862	49.1198	7.94416	43.5735	8.60044	58.3696	7.14561	47.5135	6.89779	57.2246	8.013		1.84056	1.43736	1.62577	1.48351	1.49308	2.2444	2.073	1.64258
6.49297	4.28577	4.94665	4.30517	4.17655	3.83113	8.97794	4.27634	9.26624	4.37171	10.5331	4.25971	5.27876	3.40034	6.41757	5.27211	4.05457	4.21148	4.78642	4.96994		60.5541	8.4421	43.4726	3.87341	59.1636	3.82981	37.4261	7.50358	41.9535	4.94043	49.5879	7.94416	43.6149	8.65551	58.3581	7.04694	47.5433	6.89549	57.8281	7.99694		1.84056	1.42609	1.62365	1.48627	1.4901	2.24546	2.06513	1.63449
6.48022	4.33899	4.8962	4.28688	4.17655	3.83612	8.9541	4.29963	9.17033	4.4083	10.5376	4.23587	5.23773	3.40644	6.42145	5.27155	4.14273	4.20981	4.81248	4.97105		60.5289	8.43751	43.7319	3.88488	59.3563	3.8321	37.4537	7.51276	42.0109	4.85782	50.0193	7.94186	43.5781	8.67845	58.3512	6.94827	47.541	6.90467	58.0621	7.98776		1.84141	1.41014	1.62726	1.49031	1.51392	2.24546	2.05747	1.6128
6.48576	4.35785	4.85905	4.2525	4.17821	3.84111	8.9796	4.33345	9.09714	4.42937	10.5448	4.21092	5.21555	3.40921	6.46691	5.27155	4.17433	4.16047	4.85684	4.97826		60.5151	8.40768	43.8512	3.88029	59.3793	3.8321	37.2402	7.51735	42.2748	4.80275	50.3405	7.93268	43.8053	8.68075	58.3512	6.87943	47.5387	6.94598	58.1126	7.98546		1.86927	1.40631	1.63322	1.49839	1.5254	2.24865	2.05173	1.5926
6.52291	4.36117	4.85018	4.12498	4.17766	3.83557	8.99402	4.46929	9.06221	4.42826	10.5642	4.19484	5.21999	3.4081	6.57059	5.26878	4.19484	4.07176	4.86737	4.97826		60.4073	8.36179	43.8237	3.87111	59.2117	3.85964	36.9052	7.51505	43.0641	4.78898	50.4805	8.013	44.1725	8.67157	58.3512	6.85419	47.5181	7.02629	58.1791	7.99005		1.87799	1.38568	1.62599	1.49839	1.5305	2.2561	2.05322	1.58154
6.5656	4.36284	4.84686	3.98527	4.17876	3.81672	8.96352	4.75149	9.04613	4.42604	10.5852	4.18264	5.22941	3.40921	6.6848	5.26324	4.25084	4.01132	4.86792	4.9644		60.2902	8.32737	43.7112	3.88029	59.0718	3.90324	36.4348	7.50817	44.5648	4.76833	50.4782	8.07266	44.1816	8.62797	58.3834	6.8909	47.5066	7.09742	58.2778	8.0107		1.87267	1.36463	1.61706	1.51328	1.55028	2.26077	2.05067	1.5707
6.56449	4.39555	4.84131	3.92317	4.19318	3.80064	8.88313	5.0021	9.04114	4.42327	10.6002	4.17377	5.24605	3.41365	6.76963	5.25048	4.30573	3.98139	4.86515	4.96052		60.226	8.32278	43.4909	3.90324	59.1796	3.91012	35.9438	7.4944	46.279	4.71785	50.4002	8.01988	44.2206	8.66698	58.5027	6.98269	47.5112	7.1525	58.3765	8.05889		1.85353	1.36633	1.62301	1.52349	1.59749	2.26885	2.04578	1.56623
6.53178	4.41052	4.84741	3.93869	4.21868	3.78567	8.88424	5.13128	9.03671	4.42161	10.6263	4.16047	5.26989	3.41143	6.83949	5.23108	4.35563	3.96198	4.8646	4.95774		60.5151	8.33196	43.3464	3.91701	59.5514	3.91012	35.7074	7.48981	47.5525	4.68343	50.3474	7.93268	44.4272	8.93775	58.5004	7.0217	47.525	7.21445	58.4407	8.10479		1.8312	1.34868	1.6296	1.52391	1.60898	2.27502	2.03706	1.55432
6.51958	4.40442	4.85185	3.95311	4.23698	3.77846	8.96907	5.17009	9.00178	4.41772	10.6817	4.15049	5.28042	3.40367	6.86943	5.22443	4.39887	3.92761	4.86404	4.96329		61.2058	8.33884	43.3556	3.9216	60.3247	3.91701	35.969	7.48752	48.3924	4.66737	50.313	7.87532	44.5258	9.31408	58.5532	7.0194	47.5181	7.22822	58.4568	8.12314		1.821	1.33252	1.6296	1.51881	1.60898	2.27949	2.02813	1.54326
6.52457	4.38501	4.8341	3.92206	4.25528	3.83391	9.10934	5.17397	8.99402	4.40276	10.7482	4.15215	5.27821	3.42085	6.8528	5.23274	4.42604	3.90155	4.86238	5.00043		61.791	8.33655	43.3578	3.92389	61.1049	3.9216	36.4165	7.48063	49.2253	4.6536	50.2373	7.83631	44.6039	9.52289	58.9823	7.01252	47.5594	7.21675	58.4637	8.12773		1.82036	1.33316	1.63407	1.53412	1.60834	2.29331	2.02727	1.54624
6.5473	4.37226	4.82801	3.93481	4.26914	3.9143	9.29286	5.17508	9.01176	4.40664	10.8015	4.14217	5.24993	3.44636	6.84337	5.25825	4.45321	3.90376	4.85684	5.01041		62.165	8.32278	43.312	3.90324	61.4674	3.91471	36.7744	7.46687	49.9183	4.66048	50.2763	7.82254	44.6566	9.54125	59.3012	6.99646	47.8852	7.20527	58.4178	8.14609		1.81781	1.33103	1.63471	1.53242	1.60834	2.31436	2.01281	1.55241
6.55229	4.37781	4.82357	3.98249	4.27579	3.96087	9.47416	5.1773	9.02118	4.43547	10.8636	4.12221	5.20336	3.4835	6.86388	5.29595	4.46873	3.89379	4.84464	4.9644		62.3348	8.31819	43.2729	3.88029	61.6372	3.91012	36.896	7.4508	49.9734	4.66966	50.4415	7.84549	44.652	9.53437	59.3402	6.95286	48.4199	7.1502	58.2939	8.19428		1.80568	1.32997	1.63237	1.53518	1.60621	2.32032	1.97943	1.55092
6.53954	4.37836	4.80139	4.03572	4.27579	3.99525	9.54346	5.18173	9.08716	4.45321	10.9323	4.11667	5.14514	3.52952	6.96313	5.33309	4.47372	3.89268	4.833	4.89287		62.36	8.32278	43.2018	3.86882	61.6716	3.90324	36.7079	7.44163	50.0445	4.64671	50.5287	7.86384	44.6429	9.6078	59.3058	6.88631	48.7251	7.11119	58.1585	8.2287		1.79994	1.31593	1.6296	1.52561	1.60472	2.32181	1.95008	1.55049
6.52623	4.3706	4.77423	4.06843	4.28133	3.99525	9.50853	5.18395	9.15259	4.46208	10.9467	4.14051	5.05255	3.57998	7.06182	5.36359	4.47649	3.89046	4.833	4.80583		62.3784	8.32278	43.0733	3.86193	61.8093	3.88029	36.6505	7.42786	50.531	4.62836	50.4989	7.8386	44.6911	9.67434	59.2944	6.81518	48.7779	7.12037	58.0047	8.24017		1.80186	1.31487	1.62599	1.56049	1.60026	2.32563	1.93604	1.54837
6.51792	4.37004	4.75704	4.10392	4.29242	3.96863	9.49522	5.18506	9.17365	4.47927	10.9528	4.1577	4.95275	3.60493	7.10285	5.39131	4.48038	3.88436	4.833	4.74262		62.4335	8.32278	42.9173	3.84817	62.1879	3.85046	36.6918	7.38885	51.1643	4.62836	50.0583	7.85467	44.6452	9.6927	59.4022	6.75552	48.7618	7.09054	57.9474	8.25164		1.79654	1.31423	1.61876	1.56878	1.60068	2.3233	1.91754	1.55156
6.53067	4.36006	4.73985	4.14772	4.29464	3.94812	9.53958	5.18728	9.15647	4.49645	10.9955	4.1577	4.9023	3.61601	7.14886	5.43733	4.48259	3.88769	4.82191	4.71601		62.4679	8.32278	42.814	3.82981	62.282	3.84128	36.88	7.33836	51.7219	4.62836	49.2276	7.9694	44.6245	9.7363	59.572	6.75552	48.7503	7.06071	57.9772	8.25164		1.78059	1.3138	1.61153	1.57112	1.59026	2.31819	1.89202	1.56006
6.58778	4.27413	4.7465	4.15492	4.28854	3.93426	9.58283	5.18672	9.16534	4.49036	10.9872	4.15492	4.85573	3.61491	7.23702	5.45285	4.48426	3.89545	4.81581	4.68663		62.4518	8.32507	42.7865	3.79768	62.305	3.88488	36.7194	7.32689	52.2084	4.63065	48.7021	8.21034	44.6291	9.80055	59.6133	6.65226	48.6608	7.05153	57.9979	8.23329		1.7808	1.31359	1.61131	1.58282	1.59366	2.31989	1.84928	1.55794
6.66207	4.13995	4.74595	4.17322	4.28577	3.9143	9.64215	5.18672	9.17698	4.47317	10.9201	4.14217	4.76535	3.61324	7.32795	5.43178	4.4837	3.89379	4.81636	4.67221		62.3761	8.34114	42.8117	3.76556	62.3554	4.03404	37.2701	7.34066	52.5365	4.63065	48.6264	8.4857	44.8196	9.83038	59.432	6.44803	48.4727	7.06071	57.9956	8.23329		1.78335	1.31699	1.6111	1.5775	1.59813	2.31394	1.78931	1.55666
6.69312	4.10891	4.74151	4.22866	4.30684	3.91596	9.79018	5.18562	9.1731	4.47649	10.8896	4.14328	4.67609	3.61435	7.3845	5.44232	4.48038	3.86218	4.80638	4.68995		62.3417	8.34802	42.8186	3.76326	62.3807	4.24744	37.6051	7.36361	52.5756	4.63065	48.7343	8.58208	45.049	9.83267	59.0924	6.34018	48.2799	7.08136	57.9956	8.25164		1.78421	1.31699	1.63683	1.56729	1.60557	2.31458	1.7657	1.54305
6.69866	4.12221	4.76979	4.25306	4.31515	3.98915	9.9981	5.17175	9.15591	4.48093	10.8963	4.14494	4.65225	3.61657	7.42996	5.4778	4.47317	3.80729	4.78587	4.6955		62.5161	8.34343	42.8186	3.76556	62.3784	4.38053	37.5386	7.37967	52.4998	4.63753	48.7572	8.57978	45.0169	9.83956	58.8469	6.40443	48.2363	7.09054	58.0438	8.26082		1.77825	1.31529	1.66278	1.56985	1.61684	2.31309	1.7657	1.52604
6.69977	4.12166	4.81026	4.22256	4.31682	4.10281	10.1716	5.14958	9.18641	4.46263	10.8869	4.14882	4.68663	3.6138	7.44382	5.51772	4.46762	3.78623	4.77589	4.69439		62.8488	8.34802	42.8484	3.76326	62.3853	4.44937	37.5294	7.38426	52.4815	4.63524	48.6517	8.56372	45.0146	9.83497	58.7551	6.55588	48.234	7.10201	58.1723	8.24017		1.77931	1.31423	1.66639	1.56729	1.63109	2.31543	1.75911	1.53199
6.70033	4.1577	4.81636	4.15215	4.32014	4.18154	10.2931	5.13572	9.23575	4.4338	10.8192	4.09227	4.72876	3.61047	7.44271	5.58314	4.44766	3.77902	4.77423	4.69328		63.3835	8.35949	42.9494	3.75867	62.3623	4.50444	37.534	7.38885	52.314	4.63065	48.5346	8.55454	45.1408	9.84185	58.7459	6.61554	48.1927	7.11349	58.2365	8.19887		1.78059	1.3138	1.66852	1.58005	1.64194	2.31649	1.74252	1.52944
6.70532	4.17267	4.81636	4.16823	4.32014	4.22146	10.3424	5.1396	9.22466	4.39666	10.7516	4.06788	4.77034	3.60382	7.44438	5.63083	4.45099	3.78124	4.77423	4.6966		63.9342	8.39391	43.0366	3.75867	62.3577	4.55952	37.5133	7.39573	51.9445	4.62147	48.4819	8.55684	44.9802	9.84415	58.8446	6.62702	48.0803	7.12037	58.2296	8.14609		1.78357	1.30849	1.66852	1.58835	1.65257	2.3167	1.72551	1.51222
6.71197	4.17267	4.81747	4.23753	4.31737	4.22367	10.3502	5.15235	9.1548	4.37115	10.7477	4.07287	4.79973	3.60326	7.44604	5.65245	4.49424	3.78401	4.77478	4.70936		63.7942	8.43522	42.9746	3.75179	62.4059	4.59394	37.332	7.40491	51.7495	4.60541	48.4612	8.55454	44.6865	9.83956	59.1613	6.63619	47.8072	7.16167	58.147	8.10479		1.78676	1.30934	1.66831	1.58813	1.6698	2.33031	1.72275	1.51562
6.71031	4.16435	4.81636	4.34731	4.31349	4.22866	10.3357	5.1529	9.09714	4.36062	10.7538	4.0651	4.79474	3.5833	7.44826	5.67296	4.51974	3.789	4.78143	4.71047		62.9888	8.45358	42.8232	3.72884	62.4036	4.62147	37.1117	7.40262	51.6875	4.57558	48.5461	8.54766	44.6819	9.86939	59.5582	6.63619	47.4561	7.26723	58.0162	8.07954		1.77655	1.32295	1.65448	1.58558	1.68107	2.35264	1.72955	1.52072
6.70753	4.13607	4.81747	4.56465	4.31238	4.2392	10.3235	5.13793	9.0916	4.38501	10.7721	4.03738	4.79751	3.58164	7.45436	5.64968	4.51808	3.7829	4.78809	4.70769		62.1145	8.45358	42.6603	3.70819	62.4036	4.63524	36.8731	7.38655	51.738	4.55493	48.8123	8.55913	44.8953	9.88086	59.9506	6.63619	47.3621	7.33607	57.9405	8.06119		1.7757	1.32274	1.63301	1.58877	1.68192	2.35519	1.7404	1.51158
6.70753	4.10336	4.81636	4.79086	4.31682	4.24031	10.3263	5.09746	9.00123	4.41994	10.7754	4.06732	4.81026	3.58275	7.45436	5.60588	4.51863	3.75518	4.78642	4.75537		61.4858	8.45358	42.5203	3.70819	62.3715	4.63065	36.5427	7.38655	51.7334	4.53198	49.1014	8.56143	44.9389	9.88086	60.327	6.6339	47.4034	7.34295	57.7982	8.05201		1.77549	1.32444	1.62173	1.58877	1.6783	2.35541	1.73891	1.51264
6.70587	4.04958	4.83078	4.92281	4.32181	4.23254	10.3357	5.0775	8.9674	4.42715	10.7449	4.13108	4.82579	3.58164	7.45824	5.58148	4.51752	3.70417	4.78975	4.84408		61.1553	8.45358	42.4744	3.71049	62.2361	4.62836	36.4004	7.40262	51.6072	4.49068	49.1932	8.55454	44.9412	9.92676	60.5151	6.63161	47.4584	7.33378	57.415	8.04971		1.77655	1.32614	1.60961	1.58941	1.68936	2.35732	1.72487	1.51094
6.72361	3.99414	4.83965	4.94388	4.3329	4.21092	10.3186	5.0836	8.95576	4.43103	10.7372	4.22312	4.833	3.58497	7.46212	5.58924	4.51253	3.63653	4.78975	4.86127		61.0016	8.45587	42.4996	3.69672	62.2063	4.61229	36.2467	7.42097	51.5957	4.44019	49.1335	8.54307	44.8953	9.98871	60.5243	6.63619	47.463	7.37049	57.1351	8.04971		1.77846	1.33337	1.59536	1.58665	1.72083	2.35732	1.71573	1.51285
6.75189	3.98638	4.83743	4.94388	4.37725	4.18819	10.3053	5.08027	8.91473	4.42881	10.7372	4.2952	4.8269	3.60049	7.45657	5.58924	4.50477	3.55891	4.78143	4.86238		61.0039	8.46275	42.7773	3.64394	62.2269	4.56411	35.4802	7.43933	51.621	4.42183	49.1152	8.55225	44.5327	10.0507	60.5289	6.64078	47.463	7.48752	57.1488	8.04971		1.78952	1.35102	1.58409	1.58154	1.73912	2.35732	1.69829	1.51094
6.80622	3.98638	4.83688	5.05754	4.42382	4.18542	10.3191	5.07639	8.8859	4.40941	10.7399	4.3024	4.82967	3.61102	7.4405	5.58924	4.50089	3.47075	4.78088	4.86127		60.8111	8.46505	43.1674	3.56133	62.2728	4.50674	34.5211	7.44851	51.6324	4.42642	49.1221	8.63256	44.1495	10.0782	60.5289	6.64078	47.5043	7.56095	57.2636	8.05201		1.7874	1.37569	1.57431	1.57282	1.72806	2.35711	1.67809	1.51094
6.86721	3.98582	4.85185	5.20835	4.48315	4.1832	10.3147	5.0775	8.87648	4.39887	10.7466	4.29131	4.833	3.62932	7.43052	5.58647	4.49313	3.41198	4.78476	4.86238		59.7349	8.47652	43.5414	3.51085	62.4564	4.44019	34.5761	7.44392	51.6347	4.44478	49.1909	8.71976	43.904	10.0644	60.5381	6.64078	47.6948	7.5816	57.3531	8.06807		1.78676	1.39185	1.56985	1.55751	1.73423	2.35711	1.67256	1.52327
6.90768	3.99247	4.92669	5.27821	4.60512	4.17433	10.2825	5.07417	8.86317	4.39943	10.7948	4.25472	4.84686	3.65205	7.42608	5.57261	4.46485	3.3948	4.80915	4.86404		58.287	8.47652	44.4409	3.45578	62.6308	4.41725	34.6037	7.43704	51.6485	4.44478	49.5145	8.73812	43.7181	10.0208	60.5427	6.64537	47.6512	7.5816	57.3783	8.08643		1.78995	1.40908	1.56687	1.56283	1.75124	2.35711	1.67277	1.55368
6.96978	3.99358	4.996	5.27821	4.72266	4.17987	10.2631	5.0714	8.85208	4.39555	11.0194	4.23809	4.87291	3.6393	7.42331	5.52382	4.4582	3.40644	4.84131	4.87014		57.6147	8.43063	45.9508	3.38235	62.8649	4.41725	34.7023	7.43704	51.598	4.42413	49.7393	8.73582	43.6103	10.0208	60.5449	6.65455	47.4102	7.57242	57.2544	8.10249		1.78952	1.37994	1.53433	1.56283	1.73295	2.36668	1.67299	1.5909
7.06514	3.98139	5.03536	5.26545	4.76757	4.17156	10.2687	5.07306	8.85763	4.39278	11.2816	4.35951	4.87624	3.64041	7.42553	5.42291	4.49091	3.38814	4.86072	4.86293		57.493	8.34802	47.4079	3.3158	63.5074	4.41725	35.2186	7.43933	51.6393	4.40807	49.7875	8.7427	43.4703	10.1402	60.5404	6.68438	47.3988	7.57013	57.057	8.11396		1.78803	1.37824	1.51158	1.52902	1.71828	2.37242	1.67639	1.60153
7.12391	3.97418	5.09857	5.26989	4.77866	4.16657	10.3102	5.07473	8.86705	4.39278	11.2999	4.41939	4.84187	3.65593	7.41832	5.28153	4.56077	3.32216	4.87458	4.85185		57.4655	8.25623	48.8742	3.26073	64.221	4.41725	35.5651	7.45769	52.1533	4.38512	49.6911	8.75188	43.4749	10.2274	60.6138	6.74634	47.5617	7.56554	56.901	8.11396		1.78463	1.37824	1.51073	1.49839	1.70892	2.37455	1.6917	1.61025
7.13389	3.98527	5.17841	5.27543	4.77866	4.19651	10.3601	5.0714	8.8665	4.39777	11.1513	4.41218	4.79751	3.65427	7.42275	5.20835	4.59625	3.2767	4.89897	4.85295		57.4448	8.20116	49.6085	3.20336	64.4849	4.41036	35.9874	7.46228	52.7408	4.36906	49.4892	8.75877	43.7571	10.2113	60.7148	6.79223	47.5548	7.55636	56.8964	8.11396		1.79463	1.39504	1.51923	1.4969	1.69914	2.38964	1.72934	1.61408
7.13168	3.99802	5.20447	5.28209	4.78753	4.24363	10.399	5.06808	8.88701	4.40331	10.9573	4.42271	4.78143	3.65649	7.43329	5.21001	4.59736	3.29278	4.90951	4.85462		57.4403	8.19428	49.6131	3.15059	64.2486	4.41266	36.4417	7.42556	53.1836	4.36447	49.3997	8.78171	43.9269	10.1815	60.5335	6.79912	47.5158	7.55406	56.9308	8.1002		1.81058	1.4044	1.54007	1.49074	1.70829	2.3973	1.74401	1.61408
7.13777	4.0274	5.20169	5.28819	4.80805	4.27524	10.4161	5.06641	8.95743	4.39887	10.8636	4.42327	4.79973	3.66314	7.43828	5.16011	4.59015	3.28724	4.90563	4.83965		57.4403	8.20575	50.0652	3.10469	64.9645	4.41954	36.545	7.37049	53.5462	4.37135	49.4181	8.81154	44.0738	10.1998	60.0401	6.81059	47.3988	7.54489	56.94	8.09561		1.80972	1.40929	1.55198	1.48904	1.7387	2.40219	1.74338	1.62492
7.12946	4.08895	5.20114	5.30149	4.82523	4.29242	10.4256	5.06475	9.05667	4.39721	10.8663	4.41717	4.84741	3.66425	7.44937	5.08027	4.58849	3.27393	4.90784	4.84353		57.4334	8.21493	50.6664	3.04274	66.4193	4.42642	36.5863	7.26035	53.7298	4.38971	49.6154	8.79778	44.2574	10.2411	59.6546	6.84042	47.3689	7.55177	56.9744	8.09102		1.80951	1.42949	1.55198	1.4935	1.73508	2.39624	1.74061	1.63301
7.11282	4.13496	5.19116	5.32145	4.81913	4.29797	10.4444	5.05477	9.04004	4.39998	10.9074	4.40608	4.91006	3.66758	7.47598	5.02206	4.58904	3.26838	4.90563	4.85129		57.3439	8.21952	51.5475	2.97849	67.3349	4.43101	36.8846	7.07218	53.4154	4.40577	49.8541	8.75877	44.0095	10.2916	59.5674	6.86566	47.4079	7.57472	57.0112	8.04283		1.80611	1.44161	1.53752	1.48563	1.73657	2.39347	1.73742	1.63258
7.07734	4.14716	5.18229	5.32201	4.8086	4.29963	10.4555	5.03259	8.95632	4.41828	10.9307	4.40664	4.9838	3.66979	7.48818	5.00154	4.58904	3.26949	4.89398	4.85517		57.1626	8.2287	52.7912	2.95554	67.9223	4.4356	37.1324	6.79453	53.2249	4.41954	49.8793	8.71058	43.8787	10.3306	59.5536	6.87255	47.3345	7.59078	56.9538	8.08184		1.80313	1.4448	1.52264	1.47606	1.73572	2.39347	1.73827	1.62939
7.0158	4.14328	5.17952	5.3148	4.80583	4.29963	10.4511	4.99933	8.90753	4.42992	10.9406	4.41551	5.06974	3.66536	7.48873	4.97826	4.59126	3.27559	4.86848	4.86183		56.8597	8.24247	53.7458	2.94177	68.0095	4.44478	37.1921	6.43426	53.5646	4.44019	49.9459	8.67616	43.6126	10.3444	59.5605	6.86796	47.3185	7.59078	56.7243	8.13921		1.80845	1.4448	1.52434	1.47734	1.73551	2.40262	1.7657	1.62918
6.97865	4.12554	5.17286	5.29484	4.79973	4.29908	10.4516	4.96994	8.85929	4.42881	10.9844	4.40276	5.10467	3.66259	7.48263	4.91062	4.58794	3.26561	4.85684	4.86072		56.5522	8.24247	54.2185	2.91882	67.7938	4.46314	37.1806	6.11301	53.8629	4.44478	50.2281	8.67386	43.25	10.3421	59.6064	6.86107	47.206	7.55636	56.527	8.15756		1.84184	1.43481	1.52646	1.46841	1.73933	2.40113	1.78569	1.62811
6.9598	4.10336	5.17009	5.29373	4.78587	4.29908	10.45	4.95885	8.76337	4.42604	11.0803	4.3839	5.0592	3.66092	7.49039	4.83466	4.58073	3.25175	4.85739	4.85573		56.6532	8.24017	54.3998	2.90276	67.7548	4.48379	37.1553	5.90419	53.9776	4.44019	49.9757	8.68075	43.3831	10.3421	59.8336	6.86107	46.8412	7.538	56.5063	8.16215		1.88097	1.42503	1.51987	1.46607	1.75996	2.39326	1.78506	1.62556
6.92487	4.1139	5.15013	5.29151	4.76702	4.29852	10.4439	4.95386	8.61977	4.42604	11.1497	4.39388	5.0215	3.66203	7.56968	4.80638	4.53526	3.23734	4.85406	4.85295		56.9653	8.23329	54.4113	2.89358	67.8237	4.4815	37.1301	5.75504	53.9982	4.44019	50.4507	8.73582	43.4703	10.3857	60.1549	6.86107	46.5979	7.53341	56.5201	8.19198		1.89649	1.42247	1.51136	1.45969	1.7589	2.38603	1.78229	1.6245
6.88218	4.13164	5.12795	5.29151	4.74872	4.29797	10.4389	4.95608	8.51	4.44545	11.1325	4.43768	5.02649	3.6515	7.71938	4.78809	4.44988	3.23124	4.85129	4.86792		56.9125	8.21722	54.4664	2.89588	67.8581	4.48838	37.1324	5.63342	53.9937	4.44478	52.2612	8.80696	43.4519	10.4476	60.662	6.8473	46.5061	7.54947	56.5178	8.29754		1.90861	1.42354	1.51073	1.46394	1.74699	2.38114	1.76379	1.62833
6.86	4.16047	5.1091	5.2965	4.78254	4.29464	10.4294	4.95331	8.4418	4.46984	11.1108	4.42826	5.06364	3.63653	7.87406	4.76979	4.40109	3.22625	4.86792	4.90285		56.7083	8.17133	54.7807	2.90506	67.5506	4.50674	37.1301	5.52787	53.9753	4.46543	53.5347	8.85055	43.4336	10.5234	61.9195	6.80141	46.4511	7.60225	56.527	8.48341		1.90861	1.42354	1.51073	1.46841	1.7421	2.3805	1.76294	1.63577
6.85501	4.18597	5.103	5.29484	4.88345	4.29242	10.3967	4.95054	8.40077	4.49313	11.1031	4.4399	5.10799	3.64318	7.98495	4.7709	4.39388	3.20906	4.92891	4.90563		56.2585	8.07495	55.3108	2.90965	67.4496	4.51821	37.1393	5.4292	53.9363	4.49526	53.8537	8.86662	43.468	10.5739	63.6703	6.74175	46.3937	7.62749	56.6945	8.64862		1.91223	1.42949	1.50605	1.47266	1.73933	2.38114	1.7538	1.64385
6.85446	4.21369	5.09857	5.2843	4.97438	4.29187	10.3219	4.95996	8.35919	4.52307	11.1031	4.44046	5.13294	3.67811	8.06257	4.77201	4.39444	3.18633	4.99101	4.90174		55.9074	7.97399	55.8753	2.90735	67.4244	4.52051	36.7584	5.39937	53.9592	4.50903	53.8675	8.86203	43.4749	10.5624	64.6845	6.69815	46.2881	7.61831	56.8505	8.76795		1.91563	1.43757	1.49967	1.47734	1.74614	2.38093	1.7538	1.64428
6.85501	4.19595	5.11631	5.28486	5.03592	4.28632	10.2542	4.97493	8.34478	4.52639	11.0892	4.44877	5.14292	3.71249	8.123	4.74761	4.39056	3.18522	5.01041	4.91173		55.7651	7.88679	56.2562	2.90276	67.2477	4.52739	36.1549	5.42002	53.9845	4.50215	53.856	8.85744	43.5047	10.5486	65.1182	6.69815	46.1964	7.61602	56.8391	8.85055		1.91371	1.43693	1.50754	1.47968	1.73614	2.38093	1.78612	1.65002
6.86222	4.07398	5.15512	5.27987	5.06752	4.27302	10.2437	5.00875	8.34034	4.5214	11.0704	4.45099	5.14237	3.73744	8.20007	4.71213	4.39111	3.18965	5.03204	4.91727		55.7124	7.84549	56.3434	2.8867	67.1697	4.54345	35.7648	5.43608	53.9891	4.49297	53.7504	8.85973	43.6516	10.528	65.7171	6.70045	46.0702	7.61373	56.9561	8.89874		1.90521	1.45948	1.50328	1.48351	1.73232	2.37922	1.79611	1.65002
6.86832	4.00855	5.17286	5.20946	5.07029	4.23698	10.2182	5.01263	8.31595	4.5275	11.0693	4.44267	5.13183	3.77846	8.28822	4.70658	4.39887	3.17247	5.04701	4.91782		55.7812	7.8409	56.2837	2.89588	67.2546	4.54575	35.432	5.43149	53.9822	4.49068	53.5003	8.85973	43.6493	10.4637	66.6534	6.70045	45.8889	7.61831	57.2406	8.93775		1.90351	1.47521	1.50945	1.48117	1.73529	2.37348	1.79654	1.64789
6.86887	3.99247	5.18229	5.15734	5.07085	4.18264	10.1727	5.01041	8.27713	4.5275	11.0792	4.43713	5.14292	3.82337	8.33812	4.70548	4.40109	3.15417	5.04867	4.90673		56.0107	7.8409	56.0038	2.928	67.8994	4.55493	35.0374	5.4292	53.973	4.48379	53.4705	8.86203	43.4221	10.3765	67.032	6.73487	45.8177	7.63438	57.6812	8.98365		1.90117	1.47585	1.5052	1.4733	1.73806	2.37093	1.7942	1.64024
6.89105	3.99469	5.18617	5.15124	5.0581	4.13607	10.14	5.01208	8.2666	4.53083	11.0937	4.44046	5.17453	3.83723	8.34699	4.70492	4.40885	3.11758	5.04645	4.88345		56.1093	7.83631	55.5196	2.94177	69.0857	4.55722	34.8308	5.43379	53.9569	4.47691	53.3672	8.86891	43.0894	10.3329	67.0389	6.83583	45.8522	7.63208	57.9474	9.02954		1.89925	1.49095	1.50094	1.4733	1.73402	2.37093	1.79335	1.63428
6.93153	3.97251	5.16954	5.14514	5.02926	4.1139	10.1212	5.00986	8.25828	4.54469	11.0948	4.43547	5.18672	3.83945	8.35143	4.7027	4.43547	3.09762	5.01596	4.86016		56.0933	7.81107	55.1571	2.93259	69.3014	4.55493	35.019	5.44755	53.8353	4.49068	53.2066	8.86662	42.8048	10.31	67.3441	6.91844	45.8545	7.62979	58.0002	9.07543		1.88011	1.49499	1.50307	1.48585	1.73657	2.37029	1.81121	1.62705
6.94095	3.96087	5.15346	5.11465	4.99711	4.115	10.1156	4.99822	8.23722	4.5519	11.0083	4.41218	5.18451	3.83557	8.3603	4.69605	4.44267	3.10538	4.96273	4.82135		56.1415	7.78583	54.8473	2.93489	69.01	4.55493	35.3632	5.46591	53.6816	4.53427	53.1905	8.89186	42.6694	10.2847	67.6722	6.95974	45.7512	7.63438	58.0025	9.14198		1.86842	1.49456	1.50328	1.48818	1.73827	2.37433	1.82291	1.62386
6.94539	3.96087	5.15346	5.1019	4.93612	4.0396	10.1106	4.99766	8.2228	4.55134	10.8896	4.40165	5.17065	3.83058	8.36196	4.68496	4.4643	3.10483	4.90285	4.73375		56.13	7.75829	54.6637	2.94407	68.9526	4.54804	36.0011	5.47968	53.7848	4.56181	53.2318	8.97906	42.6327	10.2755	67.9223	7.00793	45.641	7.70551	58.0047	9.24065		1.87714	1.4969	1.50392	1.49627	1.74848	2.37646	1.82227	1.62407
6.98253	3.97085	5.17508	5.11797	4.87347	3.91097	10.0596	4.99822	8.22391	4.54691	10.807	4.40996	5.16288	3.83391	8.35198	4.69827	4.50643	3.08875	4.77644	4.59126		55.9969	7.72387	54.6637	2.96013	68.9251	4.54116	37.4215	5.49345	53.8697	4.58476	53.1859	9.07773	42.5501	10.2733	68.6796	7.04694	45.6365	7.87302	57.9979	9.33473		1.87671	1.51115	1.50541	1.49669	1.76847	2.37433	1.81908	1.63003
7.07069	3.99414	5.18728	5.14625	4.82967	3.85941	9.98091	4.99267	8.17955	4.55578	10.7094	4.41883	5.15179	3.83224	8.34422	4.68663	4.55134	3.08265	4.57574	4.41107		55.9808	7.71928	54.8037	2.98537	70.0265	4.53427	39.1379	5.49804	53.7734	4.62836	53.264	9.13509	42.3574	10.2755	70.0564	7.06759	45.6319	8.00841	57.9382	9.3921		1.88245	1.522	1.50839	1.50137	1.76847	2.37433	1.82695	1.63279
7.1788	4.00356	5.19393	5.18728	4.77922	3.85608	9.88277	4.99434	8.14906	4.57851	10.6268	4.42382	5.16566	3.83224	8.33313	4.64671	4.59902	3.08431	4.38612	4.23975		56.0887	7.71469	54.9987	3.0175	71.9128	4.53657	39.9181	5.50033	53.599	4.66278	53.2043	9.13968	42.3482	10.2687	71.2932	7.07677	45.6571	8.07954	57.8464	9.41963		1.87607	1.522	1.51073	1.49733	1.76507	2.37433	1.83673	1.63343
7.27028	3.99137	5.19559	5.21944	4.721	3.85941	9.76246	4.99655	8.0914	4.57629	10.6379	4.41606	5.18007	3.8328	8.30985	4.59902	4.66389	3.07932	4.25084	4.17544		56.1025	7.70781	55.1639	3.0565	72.2868	4.58935	39.7942	5.50033	53.3947	4.66737	51.9124	9.15345	42.5134	10.2159	71.7636	7.08136	45.7489	8.12085	57.7799	9.43111		1.87586	1.52412	1.5069	1.49563	1.76592	2.3688	1.85098	1.63768
7.30133	3.95865	5.19837	5.23163	4.69383	3.86329	9.66987	4.99212	8.12411	4.57851	10.6462	4.3828	5.18672	3.82559	8.29599	4.51863	4.71213	3.05548	4.18043	4.17322		56.1782	7.69863	55.2259	3.06568	72.1399	4.63983	39.6611	5.49804	53.241	4.67425	50.157	9.27966	42.6947	10.1516	71.8026	7.08595	45.7902	8.1002	57.7799	9.42652		1.87182	1.52391	1.50392	1.50201	1.76613	2.36221	1.88245	1.63705
7.30189	3.92871	5.17175	5.23274	4.69716	3.85886	9.61498	4.99267	8.29377	4.67997	10.6751	4.35341	5.19005	3.8267	8.29543	4.47317	4.72599	3.03719	4.15603	4.17932		56.2562	7.69174	55.2534	3.0588	72.055	4.64442	39.6451	5.49574	53.1722	4.6949	49.4502	9.35997	42.8989	10.0805	71.7843	7.13414	45.7558	8.0543	57.7546	9.42652		1.87416	1.52306	1.50392	1.50201	1.76826	2.36434	1.90904	1.64279
7.29801	3.93149	5.08138	5.23108	4.72544	3.85553	9.56453	4.99766	8.47673	4.80416	10.7178	4.33012	5.18506	3.8267	8.29488	4.47705	4.73819	3.09152	4.14827	4.18708		56.2631	7.69174	55.6573	3.05421	71.9793	4.62836	39.652	5.48656	53.1607	4.71326	49.3584	9.34391	42.8301	10.0117	71.7911	7.25117	45.7443	8.013	57.6307	9.42652		1.89224	1.52221	1.49946	1.49435	1.76953	2.36561	1.93094	1.6396
7.29801	3.88491	5.06142	5.21777	4.71102	3.85886	9.54679	5.01319	8.561	4.85739	10.7616	4.31793	5.17674	3.82781	8.29488	4.4643	4.76813	3.24122	4.13663	4.171		56.3526	7.69404	56.0612	3.04733	71.9174	4.62606	40.026	5.45214	53.1515	4.75456	49.3676	9.30719	42.3849	9.98642	71.8118	7.32919	45.7673	7.9694	57.7363	9.41963		1.89181	1.52731	1.49499	1.50201	1.76741	2.36774	1.96071	1.63088
7.29856	3.86828	5.08582	5.19948	4.70769	3.85996	9.54845	5.05477	8.56489	4.8524	10.812	4.31848	5.1396	3.83058	8.28767	4.46319	4.80527	3.3704	4.12166	4.12498		56.4558	7.68486	56.13	3.04274	71.9082	4.62606	40.3931	5.40854	52.9565	4.81193	49.2414	9.27277	42.3344	9.97265	71.8439	7.31771	45.7856	7.91662	57.8556	9.41504		1.88735	1.52179	1.47543	1.50265	1.76741	2.36795	1.98963	1.6128
7.30577	3.89157	5.08914	5.17619	4.74595	3.86717	9.54568	5.11908	8.56877	4.86183	10.8602	4.3146	5.07861	3.80618	8.2788	4.41717	4.85462	3.41864	4.11667	4.12055		56.5866	7.65044	56.3296	3.04733	72.0573	4.62606	40.5974	5.37412	52.6834	4.85094	48.9798	9.25901	42.5341	9.9497	71.9059	7.29706	45.8154	7.88909	57.7041	9.38521		1.88373	1.52179	1.44225	1.50031	1.76656	2.38284	2.00218	1.60919
7.34735	3.88491	5.0836	5.14348	4.76868	3.86662	9.53625	5.15678	8.5671	4.92559	10.8569	4.31238	5.05089	3.77735	8.2727	4.4144	4.90618	3.43527	4.11778	4.11833		56.722	7.60455	56.5843	3.05192	72.3625	4.62147	40.8498	5.33511	52.5274	4.86471	48.9087	9.26589	42.7108	9.92905	71.9518	7.27641	45.921	7.88909	57.5688	9.31408		1.87714	1.52625	1.43077	1.50669	1.76656	2.39241	2.00409	1.60919
7.46711	3.86773	5.08526	5.13405	4.79308	3.8522	9.50299	5.15512	8.54881	4.97049	10.8142	4.31626	5.05976	3.71193	8.25385	4.41052	4.92281	3.49681	4.11279	4.0895		56.7358	7.5816	56.7335	3.04962	72.156	4.6077	41.2077	5.27775	52.4906	4.867	49.0555	9.27507	42.9655	9.91987	71.9242	7.29706	46.1734	7.90285	57.5619	9.25442		1.86076	1.52327	1.4212	1.50669	1.76549	2.39113	1.99431	1.59813
7.64286	3.87882	5.08526	5.13904	4.80805	3.85109	9.45752	5.15124	8.55213	5.02206	10.7699	4.33345	5.08138	3.60548	8.23999	4.41329	4.91173	3.56113	4.12388	4.04736		56.7404	7.5816	56.7106	3.0565	71.7728	4.6077	41.49	5.24103	52.7132	4.867	49.1542	9.29113	42.993	9.9084	71.8715	7.37737	46.279	7.90974	57.5711	9.20393		1.85162	1.51243	1.42226	1.47415	1.76911	2.39794	1.98878	1.58452
7.85355	3.8888	5.08582	5.22276	4.80028	3.84888	9.43867	5.15069	8.57819	5.05754	10.7377	4.34177	5.18451	3.57499	8.23112	4.41717	4.90784	3.56667	4.20593	4.00911		56.7519	7.58619	56.6119	3.0588	71.6466	4.6077	41.6713	5.22497	53.3236	4.8693	49.0165	9.30949	42.9999	9.87857	71.8508	7.40262	46.2859	7.90515	57.5389	9.14427		1.85119	1.51349	1.42162	1.46756	1.77804	2.41197	1.99516	1.58218
8.04649	3.88159	5.10079	5.34917	4.80028	3.83668	9.43257	5.15401	8.59316	5.07251	10.7144	4.33401	5.38521	3.58885	8.23666	4.42161	4.95275	3.55447	4.41606	3.90986		56.784	7.56095	56.6853	3.0565	71.5915	4.61229	41.7676	5.21579	54.0602	4.87618	48.9454	9.3462	42.8966	9.84185	71.8393	7.41179	46.3363	7.88909	57.5665	9.10526		1.84609	1.51349	1.42992	1.46756	1.78314	2.41474	1.99176	1.57793
8.13354	3.85497	5.19615	5.4401	4.80028	3.82171	9.43424	5.16566	8.6231	5.29872	10.7067	4.32735	5.5532	3.61934	8.25385	4.40664	5.0337	3.54837	4.60568	3.78068		56.7863	7.46228	56.8368	3.0565	71.58	4.61918	41.7883	5.20891	54.3838	4.88077	48.8467	9.39669	42.8989	9.80055	71.8393	7.4072	46.7195	7.85926	57.7615	9.06396		1.84184	1.49818	1.42162	1.46905	1.78017	2.41963	1.98708	1.57367
8.13243	3.81228	5.30648	5.47614	4.79363	3.80341	9.43257	5.16566	8.65969	5.60532	10.7105	4.32791	5.67241	3.62932	8.26494	4.38501	5.12962	3.57277	4.69383	3.70251		56.7266	7.35213	56.9515	3.07716	71.564	4.61918	41.7631	5.19973	54.2208	4.88077	48.0482	9.42193	42.9746	9.75007	71.8669	7.34984	47.089	7.80877	57.9244	8.98365		1.83928	1.49031	1.41865	1.48585	1.7774	2.42941	1.98432	1.57389
8.09916	3.7951	5.36747	5.48168	4.76702	3.77015	9.42038	5.16288	8.68963	5.87977	10.6983	4.32458	5.79106	3.68088	8.26826	4.36117	5.27543	3.60659	4.74041	3.64595		56.6991	7.31312	57.1557	3.10469	71.4492	4.62147	41.8089	5.18367	53.9432	4.87618	47.2771	9.39669	43.0389	9.67893	71.9587	7.25117	47.089	7.76058	57.6743	8.90563		1.83886	1.49031	1.41631	1.48712	1.78335	2.42835	1.9841	1.57389
8.07477	3.79621	5.39131	5.46782	4.72544	3.74852	9.40485	5.16067	8.73011	6.11485	10.6762	4.29187	5.85592	3.75351	8.2727	4.34842	5.43456	3.63043	4.77034	3.65482		56.7542	7.30394	57.2269	3.13911	71.2519	4.62147	41.8457	5.17449	53.8032	4.867	47.5043	9.36915	43.0917	9.57567	72.1583	7.18233	47.4538	7.72616	57.1305	8.83679		1.84035	1.48989	1.40652	1.49478	1.79207	2.42558	1.98325	1.57431
8.04982	3.78733	5.40573	5.4462	4.68385	3.76072	9.3921	5.15789	8.71181	6.26122	10.6817	4.26526	5.87866	3.7707	8.2788	4.35341	5.56318	3.68532	4.79363	3.7075		56.7633	7.29936	56.9515	3.15288	70.8733	4.63065	41.9214	5.16531	54.1015	4.867	47.6282	9.35309	43.0595	9.48847	72.2937	7.15709	47.7223	7.69863	56.4926	8.76106		1.84099	1.48989	1.40206	1.49414	1.78973	2.41878	1.98283	1.57112
8.01932	3.78401	5.4085	5.43234	4.64504	3.77625	9.40042	5.15734	8.67799	6.36268	10.6834	4.26248	5.89474	3.79011	8.27436	4.31959	5.65356	3.76349	4.79363	3.73522		56.8643	7.28559	56.8	3.16665	70.5704	4.63753	42.0637	5.14007	54.4572	4.86241	47.5135	9.3049	43.2293	9.44258	72.3029	7.11578	47.7223	7.68715	56.1208	8.71746		1.84609	1.48989	1.41375	1.49265	1.79356	2.4241	2.00069	1.5741
8.00047	3.78512	5.38909	5.42568	4.62785	3.78234	9.45253	5.17785	8.68298	6.40204	10.6423	4.26248	5.90472	3.79288	8.25718	4.26747	5.70179	3.7829	4.79973	3.76294		57.1305	7.2374	57.057	3.22402	70.575	4.63065	42.1394	5.09647	54.4526	4.85782	47.3666	9.23606	43.0963	9.37144	72.3166	7.06071	47.6948	7.68027	56.2677	8.65551		1.86012	1.48861	1.42035	1.48818	1.79356	2.42984	1.99857	1.57133
7.99826	3.80508	5.36969	5.42568	4.62342	3.79565	9.49024	5.19726	8.68187	6.41258	10.5586	4.24086	5.88697	3.78623	8.23722	4.27801	5.71288	3.77791	4.82246	3.79288		57.1924	7.1089	57.3921	3.28827	70.5796	4.61	41.9994	5.04828	54.3493	4.84864	47.4492	9.19934	42.7796	9.32326	72.3419	6.99875	47.6558	7.66421	56.1828	8.57519		1.84056	1.48882	1.4212	1.48521	1.78335	2.43026	1.97709	1.56793
7.9977	3.82393	5.34474	5.4218	4.61843	3.81506	9.49467	5.20668	8.6475	6.5595	10.5553	4.22035	5.85482	3.76349	8.21393	4.2891	5.70955	3.76238	4.85573	3.81173		57.0112	6.8932	57.5756	3.30892	70.591	4.59394	42.7612	5.00239	54.2828	4.83717	47.798	9.16951	42.6029	9.37603	72.3442	6.92303	47.5181	7.65044	56.0887	8.52471		1.82397	1.4867	1.41631	1.48393	1.77889	2.43026	1.97368	1.56283
7.99604	3.83502	5.34086	5.41681	4.59625	3.81783	9.50798	5.23163	8.55435	6.7724	10.593	4.21369	5.83153	3.74353	8.1973	4.27634	5.67352	3.76238	4.94444	3.82836		56.4283	6.69586	57.6055	3.35711	70.7035	4.59394	44.5534	4.96338	54.2598	4.82799	48.0872	9.12362	42.5134	9.41045	72.3419	6.87255	47.4837	7.63667	55.912	8.52012		1.81206	1.48733	1.40716	1.46033	1.77889	2.43026	1.9807	1.56283
8.0038	3.89767	5.33919	5.41293	4.5896	3.80452	9.50798	5.25769	8.33646	6.9282	10.6224	4.21868	5.81656	3.72856	8.19175	4.2708	5.61974	3.77181	5.1335	3.8583		55.1915	6.53982	57.5711	3.42824	70.8297	4.60311	46.3845	4.93584	54.269	4.8234	48.0941	9.11215	42.4905	9.40586	72.3419	6.84042	47.5846	7.62061	54.5995	8.53159		1.79441	1.5018	1.41035	1.43587	1.75911	2.42537	1.97836	1.56176
8.02265	3.95921	5.33864	5.41016	4.63174	3.79676	9.47028	5.26324	8.13076	7.0036	10.5448	4.24474	5.80935	3.70916	8.18399	4.2708	5.61031	3.76959	5.33642	3.8766		53.5577	6.41591	57.4701	3.4466	70.8549	4.60082	48.2409	4.90831	54.4342	4.81652	48.0642	9.12821	42.4492	9.40816	72.3327	6.80371	47.6833	7.61373	52.3644	8.55684		1.7757	1.52561	1.41673	1.43438	1.73019	2.41049	1.97773	1.56049
8.06756	3.96531	5.3403	5.40683	4.67665	3.79787	9.4481	5.24771	8.15738	7.03077	10.3862	4.28133	5.82654	3.71082	8.16292	4.26747	5.61197	3.77236	5.47836	3.88381		52.151	6.36542	57.3393	3.4466	70.9169	4.6077	49.0647	4.88765	54.6017	4.83488	48.055	9.1328	42.4721	9.41045	72.195	6.77158	47.6925	7.61373	50.1776	8.59814		1.77931	1.52731	1.41694	1.43438	1.72275	2.40793	1.98006	1.55751
8.21171	3.98083	5.33032	5.40406	4.70825	3.79953	9.44588	5.23884	8.21227	7.03909	10.318	4.30129	5.83153	3.73245	8.13742	4.26027	5.61586	3.7646	5.52825	3.8899		51.2286	6.34936	57.2682	3.44889	71.4676	4.61459	49.0096	4.88765	54.5811	4.87159	47.8095	9.13509	42.5868	9.41275	71.8669	6.76699	47.7246	7.61602	49.0257	8.62338		1.78272	1.53178	1.42524	1.4229	1.72275	2.40793	1.97751	1.55943
8.43016	3.9642	5.30759	5.40351	4.71546	3.77181	9.46196	5.24605	8.20672	7.04186	10.3169	4.30351	5.83153	3.74187	8.08863	4.25916	5.64247	3.76072	5.52382	3.89157		50.6733	6.30806	57.2544	3.42365	71.6351	4.61918	49.0716	4.90372	54.2254	4.90372	47.1441	9.14657	42.6213	9.38521	71.6167	6.7624	47.8325	7.63667	48.8536	8.6165		1.75741	1.56793	1.42843	1.42141	1.71233	2.40815	1.97156	1.54922
8.57209	4.04792	5.27987	5.40462	4.70825	3.72136	9.46806	5.25492	8.22446	7.0535	10.3064	4.28854	5.82931	3.73854	7.99493	4.2392	5.66409	3.74852	5.52326	3.88713		50.5379	6.20939	57.259	3.40071	71.7934	4.63065	49.3676	4.92437	53.7091	4.88995	46.7379	9.16492	42.4377	9.35309	71.4997	6.74634	47.8898	7.70322	48.888	8.58667		1.75741	1.59069	1.42736	1.42141	1.69914	2.40793	1.97135	1.5473
8.61201	4.31626	5.24106	5.40351	4.69494	3.70251	9.46307	5.26823	8.26605	7.08178	10.2459	4.23753	5.84983	3.73854	7.89624	4.2026	5.66853	3.71526	5.52382	3.87105		50.4943	6.10613	57.2452	3.39612	71.7177	4.64212	51.3548	4.96338	53.3282	4.84406	46.7241	9.14886	42.2266	9.36915	71.4079	6.72569	47.8784	7.75141	48.9018	8.54995		1.77634	1.56644	1.41248	1.41716	1.69149	2.4158	1.97135	1.54433
8.6048	4.446	5.18783	5.4024	4.67997	3.6953	9.4858	5.26823	8.29266	7.09786	10.2049	4.16269	5.90139	3.73633	7.84357	4.19373	5.66076	3.69086	5.52548	3.8705		49.5535	6.0327	57.259	3.40529	71.5777	4.6536	53.8101	5.01157	53.1125	4.81881	46.715	9.10985	42.0361	9.41275	71.4814	6.71651	47.8233	7.75141	48.8788	8.52012		1.7791	1.56985	1.40589	1.40482	1.68766	2.40985	1.97347	1.54837
8.59649	4.5275	5.13572	5.39186	4.68496	3.69585	9.53847	5.26601	8.39246	7.10229	10.191	4.13219	5.92523	3.73854	7.83692	4.19373	5.64247	3.68864	5.53269	3.87105		47.7499	5.9891	57.259	3.40529	71.6145	4.66507	54.3769	5.03451	52.9565	4.82799	46.7402	9.0892	41.8365	9.44946	71.8118	6.70045	47.7705	7.756	48.9018	8.50635		1.77102	1.60196	1.42524	1.38866	1.68681	2.40049	1.9739	1.56368
8.59094	4.5957	5.08859	5.39519	4.71157	3.67423	9.57395	5.27599	8.6037	7.10285	10.1872	4.14661	5.92634	3.66813	7.85965	4.19595	5.62694	3.73355	5.54212	3.89656		45.9118	5.91567	57.1924	3.40529	71.619	4.69261	54.4021	5.0391	52.8739	4.85782	46.7815	9.08461	41.7998	9.45405	72.1055	6.70045	47.8325	7.76288	49.0509	8.49488		1.7706	1.59813	1.43885	1.38398	1.68532	2.40177	1.97262	1.55602
8.59316	4.60679	5.08637	5.38965	4.74096	3.67811	9.64326	5.30981	8.72401	7.10285	10.196	4.13995	5.92135	3.51954	7.90511	4.19928	5.61419	3.81395	5.56374	3.91042		44.5075	5.78028	57.1236	3.40759	71.6213	4.70179	54.4365	5.03222	52.867	4.867	46.8205	9.08461	41.8548	9.41734	72.3029	6.71651	48.1399	7.77206	49.1886	8.45587		1.77102	1.58324	1.45905	1.38377	1.68532	2.409	1.97454	1.53306
8.59372	4.60512	5.10578	5.39131	4.77478	3.68476	9.79517	5.31646	8.76836	7.1034	10.2459	4.13774	5.91026	3.47907	7.95889	4.18154	5.60089	3.97861	5.63471	3.9143		43.5093	5.66096	57.1259	3.40759	71.7521	4.70179	54.4411	5.00239	52.5733	4.87618	46.848	9.09149	41.7791	9.40357	72.4956	6.73028	48.3969	7.76058	49.0349	8.38933		1.77145	1.58941	1.47394	1.38377	1.68532	2.37093	1.97347	1.52434
8.59205	4.60512	5.12795	5.39297	4.77478	3.68421	9.91549	5.31646	8.77612	7.1034	10.2942	4.1455	5.93188	3.5018	8.00602	4.171	5.57815	4.17488	5.72452	3.91319		42.8576	5.63342	57.1419	3.40988	72.6195	4.69949	54.4182	4.94961	51.9904	4.88765	46.7999	9.10067	42.0705	9.41045	72.6379	6.73716	48.4291	7.73764	49.0027	8.32507		1.77145	1.59345	1.48648	1.38802	1.68574	2.3284	1.97071	1.52859
8.58928	4.60235	5.12684	5.39297	4.6589	3.67423	9.93434	5.31702	8.80107	7.10839	10.2903	4.14882	5.93521	3.57221	8.04926	4.15714	5.55819	4.25805	5.78662	3.94202		42.7062	5.63342	57.2498	3.41906	73.5167	4.68802	54.3792	4.89913	51.3525	4.87389	46.8412	9.09838	42.6924	9.3898	72.4658	6.73716	48.4291	7.73075	48.9821	8.29065		1.76379	1.5926	1.48967	1.41375	1.68192	2.31266	1.97198	1.53986
8.58873	4.59958	5.10689	5.39297	4.59126	3.67423	9.93267	5.34474	8.8798	7.11227	10.2903	4.14716	6.03889	3.69142	8.06257	4.14716	5.55875	4.28466	5.86757	3.98471		43.1215	5.61965	57.4311	3.41677	73.9573	4.68802	54.3746	4.87618	51.185	4.87159	46.6392	9.11903	43.1903	9.35538	72.1767	6.73716	48.3281	7.74223	48.9821	8.30213		1.74933	1.59047	1.48414	1.42141	1.68277	2.28565	1.98134	1.54433
8.58651	4.60346	5.08304	5.39242	4.61344	3.67146	9.92879	5.39353	8.88757	7.11227	10.3008	4.1455	6.11096	3.89046	8.06201	4.14661	5.5532	4.32403	5.96293	4.01798		43.9499	5.59441	57.6215	3.42365	74.1638	4.71096	54.37	4.86241	51.5108	4.89224	46.3937	9.1305	43.445	9.34161	71.9587	6.73716	47.4148	7.82254	48.8559	8.37556		1.7489	1.59345	1.47224	1.40993	1.6934	2.25439	1.99006	1.54433
8.58429	4.5896	5.06475	5.38965	4.63617	3.70361	9.94764	5.4279	8.88202	7.11227	10.3296	4.14273	6.1154	4.10392	8.08364	4.14106	5.54877	4.35064	6.02891	4.03128		44.5075	5.57376	57.8097	3.46037	74.1409	4.74079	54.3723	4.85094	51.3754	4.89683	46.3868	9.10985	43.5254	9.37603	71.4928	6.73716	45.6525	7.91433	48.8628	8.45358		1.74742	1.59409	1.48266	1.41375	1.71275	2.23058	1.99899	1.55581
8.58706	4.56909	5.03259	5.38909	4.71878	3.80341	10.0175	5.48889	8.8726	7.11393	10.328	4.13884	6.11485	4.22478	8.11857	4.14273	5.55099	4.33622	6.06772	4.0396		44.6153	5.54623	57.9634	3.50167	74.4897	4.75686	54.3654	4.82799	50.9349	4.87848	46.3845	9.07773	43.5116	9.38751	70.8595	6.72798	44.0141	7.95334	49.0211	8.45817		1.74486	1.59707	1.47904	1.44204	1.71637	2.1957	1.9975	1.58261
8.60259	4.57629	5.01041	5.38743	4.95552	3.80896	10.1084	5.57815	8.87093	7.12502	10.3263	4.14273	6.10265	4.23753	8.16514	4.14439	5.56152	4.31848	6.10265	4.05457		44.636	5.5141	58.0025	3.55445	74.9325	4.75456	54.3516	4.79357	50.6366	4.85782	46.4901	9.03183	43.507	9.38521	70.6232	6.68209	43.149	7.95793	48.4979	8.46505		1.74125	1.59664	1.47904	1.44353	1.71126	2.1587	1.96794	1.61897
8.60924	4.61122	4.99323	5.38577	5.22775	3.75629	10.1761	5.63027	8.86982	7.135	10.3485	4.14661	6.09877	4.22201	8.20118	4.15603	5.57372	4.29797	6.14035	4.05457		44.6497	5.49345	57.8992	3.60723	74.9762	4.72703	54.3402	4.78898	50.6687	4.84635	46.6278	9.0043	43.5093	9.40816	70.6759	6.59719	42.9196	7.95334	47.2244	8.46964		1.73317	1.59579	1.48542	1.44076	1.7102	2.14828	1.93796	1.62003
8.58374	4.67886	4.96883	5.38632	5.39131	3.7147	10.18	5.6397	8.87703	7.14055	10.4051	4.1455	6.09932	4.22645	8.19785	4.18597	5.57095	4.30739	6.16973	4.05734		44.7163	5.48886	57.8785	3.64624	74.9073	4.70408	54.2461	4.83029	51.0244	4.83029	46.6622	9.03413	43.5116	9.477	70.5956	6.55588	43.0251	7.94875	46.3891	8.46964		1.72636	1.59834	1.49797	1.43991	1.70063	2.15189	1.93009	1.61046
8.55269	4.75371	4.96828	5.38632	5.45895	3.70694	10.1711	5.63027	8.88479	7.14443	10.522	4.14661	6.09821	4.227	8.17124	4.21092	5.56485	4.37559	6.17195	4.08396		45.1798	5.48886	57.8831	3.69442	74.7857	4.69261	54.4342	4.86012	51.2423	4.81422	46.6989	9.10756	43.5047	9.58714	70.5933	6.61784	42.9517	7.94186	46.2537	8.47423		1.71956	1.59877	1.49946	1.43906	1.70467	2.15742	1.92477	1.61578
8.49946	4.77755	4.9644	5.38299	5.48944	3.71581	10.2066	5.62362	8.85707	7.15164	10.6301	4.14716	6.09156	4.22755	8.09805	4.21702	5.56596	4.41883	6.17361	4.10502		45.3565	5.48656	57.8808	3.78392	74.3405	4.68113	54.9001	4.87159	51.2309	4.80275	46.77	9.17869	43.6149	9.63763	70.5933	6.69586	41.49	7.94186	46.2698	8.48111		1.70722	1.60047	1.49775	1.4414	1.70127	2.15104	1.91776	1.62386
8.43293	4.777	4.98047	5.37246	5.51717	3.71581	10.2287	5.63138	8.81549	7.15884	10.6329	4.14106	6.0716	4.22866	7.98107	4.21536	5.56651	4.4338	6.16863	4.13441		45.2005	5.48886	57.9864	3.86193	73.4984	4.68343	55.2098	4.87159	51.1987	4.80046	46.8916	9.24065	44.3331	9.62845	70.5933	6.7188	39.2435	7.94645	46.2904	8.47193		1.69702	1.60174	1.49584	1.4431	1.70191	2.14275	1.91754	1.61961
8.38137	4.7842	5.00321	5.36581	5.53214	3.70528	10.2177	5.68239	8.79276	7.15607	10.5603	4.14106	6.06495	4.22534	7.86741	4.23365	5.56817	4.42881	6.16474	4.17322		45.1821	5.47509	58.3489	3.94913	72.5989	4.68572	55.219	4.867	51.2079	4.80046	47.0018	9.28884	45.2441	9.58255	70.5956	6.70962	37.6303	7.94645	46.2859	8.46275		1.6934	1.60791	1.49414	1.44629	1.70233	2.12893	1.91669	1.61833
8.3542	4.79474	4.9838	5.36858	5.53491	3.71082	10.2043	5.76112	8.78999	7.15274	10.4954	4.12443	6.08934	4.20981	7.76096	4.22811	5.56873	4.37559	6.19413	4.18708		45.1775	5.46362	58.5784	4.06387	71.7957	4.68343	55.1777	4.86012	51.2033	4.80963	46.9972	9.3049	45.5997	9.51601	70.6484	6.63161	36.522	7.9281	46.2377	8.4421		1.68638	1.60791	1.4935	1.44948	1.70276	2.12893	1.90415	1.62131
8.28933	4.80084	4.9339	5.36747	5.53713	3.75296	10.1938	5.82377	8.80274	7.15496	10.5697	4.06566	6.09544	4.21148	7.68389	4.23753	5.56984	4.27357	6.22462	4.18763		45.1683	5.53016	58.6037	4.14188	71.245	4.68572	55.2351	4.85094	51.185	4.83717	46.9651	9.3049	45.8567	9.47012	70.692	6.5054	35.8084	7.87761	46.178	8.42145		1.68638	1.63641	1.49286	1.44948	1.70403	2.14168	1.87756	1.62152
8.21559	4.79807	4.85573	5.37468	5.53657	3.78512	10.1805	5.86812	8.81937	7.16162	10.7421	4.05901	6.09156	4.22534	7.63732	4.24419	5.56651	4.2148	6.22573	4.18597		45.2051	5.63572	58.5624	4.19696	70.8366	4.70637	55.1616	4.83717	51.1597	4.84864	46.9307	9.28884	46.0197	9.44487	70.6736	6.40443	35.5261	7.7973	46.1	8.42833		1.69957	1.65214	1.50541	1.44502	1.71445	2.14105	1.84885	1.61854
8.18399	4.79696	4.77589	5.45008	5.55154	3.87715	10.1783	5.87256	8.81993	7.17049	10.8242	4.06012	6.13536	4.23033	7.60683	4.24252	5.54322	4.18264	6.21797	4.18597		45.3244	5.75963	58.4293	4.25203	70.7953	4.74997	55.1112	4.81881	51.1666	4.85323	46.91	9.23147	45.6869	9.52289	70.7608	6.38608	35.4114	7.73993	46.0243	8.4421		1.69106	1.64853	1.51307	1.4465	1.73062	2.13509	1.82801	1.61472
8.16126	4.79696	4.68829	5.55154	5.61586	4.00855	10.2177	5.8781	8.81937	7.19266	10.8364	4.06178	6.17528	4.23421	7.59574	4.24086	5.52437	4.14661	6.19191	4.18763		45.4529	5.87895	58.2227	4.29563	70.6805	4.74997	55.258	4.80046	51.2768	4.867	46.9995	9.17181	45.9967	9.74548	70.5405	6.39296	35.3471	7.72158	46.0082	8.43063		1.66171	1.65236	1.51392	1.44353	1.73338	2.13275	1.8412	1.61621
8.14296	4.80306	4.56798	5.65467	5.68849	4.04016	10.2892	5.91137	8.81937	7.19377	10.8231	4.064	6.19524	4.23421	7.58797	4.24142	5.52715	4.12886	6.13536	4.18763		45.5493	5.91796	57.8992	4.34611	69.7925	4.73391	55.3636	4.76374	51.2561	4.867	47.0224	9.12821	46.6989	9.89234	70.3455	6.39296	35.5537	7.71699	46.0151	8.41227		1.65363	1.65278	1.5052	1.4531	1.737	2.12531	1.8412	1.62577
8.14407	4.86404	4.49036	5.75391	5.73062	4.02629	10.3369	5.96182	8.83268	7.19488	10.8203	4.06455	6.23682	4.23365	7.58243	4.25694	5.52271	4.12942	6.07936	4.18708		45.5332	5.91337	57.4265	4.41725	68.9412	4.73162	55.4049	4.70867	51.2492	4.86471	46.7976	9.09149	47.3116	9.96576	70.2032	6.39296	36.3935	7.73075	46.0518	8.39162		1.69574	1.64853	1.49712	1.45905	1.75401	2.11276	1.82185	1.63832
8.11968	5.00043	4.48869	5.7966	5.75003	4.02408	10.3662	6.0217	8.892	7.20874	10.8181	4.06954	6.25789	4.21148	7.58298	4.26526	5.5094	4.1394	6.02835	4.18763		46.0495	5.9019	56.9377	4.44478	68.122	4.72703	55.3728	4.67425	51.2355	4.86241	46.8182	9.08232	47.8485	9.9933	70.1137	6.39525	37.8438	7.76517	46.0862	8.38015		1.70914	1.65342	1.5018	1.46947	1.77442	2.09086	1.80249	1.6379
8.11025	5.08637	4.49645	5.80436	5.75945	4.03738	10.379	6.03612	8.948	7.21429	10.8054	4.09005	6.26288	4.17821	7.58077	4.26526	5.49776	4.14827	5.97069	4.19152		47.7384	5.9019	56.94	4.44478	67.032	4.73621	55.1754	4.6513	51.1138	4.86012	46.1941	9.10526	48.0803	9.98642	70.0885	6.41361	39.4248	7.81566	46.0518	8.37556		1.69064	1.66129	1.50626	1.49882	1.77783	2.08129	1.78803	1.63556
8.11857	5.14902	4.50533	5.80436	5.75502	4.06899	10.3673	6.03334	8.9602	7.17936	10.7976	4.12554	6.28672	4.16823	7.5791	4.26526	5.49499	4.14938	5.93632	4.20759		49.8013	5.91796	57.2269	4.45167	66.534	4.74079	54.8702	4.58705	51.0152	4.86012	45.4919	9.11674	48.2386	9.97953	70.0885	6.46409	40.1315	7.85696	45.9302	8.37556		1.70573	1.6615	1.51094	1.50839	1.78527	2.08384	1.78527	1.63747
8.1291	5.24217	4.50034	5.83929	5.74947	4.10502	10.3402	6.04998	8.95632	7.10784	10.7837	4.13663	6.29005	4.16712	7.57799	4.26526	5.50109	4.15714	5.92301	4.34454		52.1373	5.88354	57.1213	4.46314	66.9379	4.73162	54.4801	4.53198	51.3318	4.87389	45.4254	9.11444	48.335	10.0667	70.1252	6.54441	39.9984	7.86384	45.6319	8.37556		1.70552	1.65959	1.49733	1.50626	1.79824	2.07682	1.7723	1.62748
8.15183	5.31812	4.50311	5.96847	5.74726	4.14162	10.323	6.07825	8.94301	7.03964	10.7494	4.13385	6.28395	4.15936	7.57356	4.26914	5.50552	4.15714	5.91192	4.46374		54.1336	5.81241	57.0134	4.46314	67.9659	4.73391	54.2094	4.51133	51.6531	4.94273	46.1413	9.11215	48.234	10.1906	69.7626	6.60407	40.5561	7.795	45.5814	8.37556		1.7068	1.65363	1.49584	1.50711	1.80781	2.03727	1.7589	1.60238
8.18953	5.33476	4.53083	6.02558	5.74171	4.16934	10.287	6.07659	8.90309	7.00748	10.7089	4.12997	6.27896	4.15104	7.57522	4.27413	5.50608	4.1588	5.89972	4.53027		54.2713	5.76881	56.8941	4.46314	69.1477	4.74309	54.1956	4.47232	51.7426	5.06205	47.066	9.09379	48.1422	10.2342	69.1041	6.65226	41.7286	7.64815	45.82	8.36867		1.7068	1.65363	1.49435	1.51477	1.81674	2.01005	1.75762	1.58409
8.22169	5.33864	4.58738	6.00396	5.75945	4.21092	10.2365	6.05996	8.84432	6.99639	10.6983	4.12997	6.30224	4.17211	7.57744	4.25472	5.50552	4.16324	5.88032	4.5641		54.1313	5.75733	56.3411	4.46084	69.9646	4.74997	54.2048	4.40348	51.7678	5.2112	47.9564	9.08691	48.2226	10.2526	68.7484	6.76011	42.8301	7.52882	46.0564	8.33655		1.70403	1.65619	1.49031	1.51945	1.82333	1.98729	1.75762	1.58261
8.22945	5.33365	4.66611	6.00451	5.82432	4.25139	10.2077	6.04831	8.84876	6.99085	10.7111	4.12831	6.31666	4.17876	7.55803	4.23199	5.49942	4.18154	5.86535	4.56354		54.7784	5.7734	56.1002	4.46543	70.2927	4.75686	54.1726	4.38283	51.9216	5.34888	48.8972	9.12821	48.4819	10.271	68.6383	6.9781	43.7961	7.47375	45.8223	8.29754		1.70595	1.65533	1.48585	1.52412	1.81993	1.91244	1.76081	1.57963
8.22336	5.32866	4.73763	6.00507	5.85981	4.26137	10.1994	6.04221	8.91972	6.98863	10.7577	4.12443	6.32054	4.1771	7.54251	4.23698	5.49166	4.20704	5.86535	4.57297		55.1135	5.79405	56.4398	4.46543	70.295	4.75915	54.1566	4.38283	52.1533	5.46821	49.6223	9.1741	48.7411	10.287	68.6061	7.24199	44.2826	7.46916	45.9302	8.27918		1.69531	1.65427	1.48542	1.52859	1.8127	1.86565	1.75699	1.57963
8.2167	5.33199	4.7903	6.00174	5.86535	4.26027	10.1827	6.04665	8.95077	6.98641	10.8292	4.12055	6.37266	4.17987	7.52754	4.24086	5.48168	4.20538	5.87034	4.60235		55.3062	5.817	56.6211	4.47002	70.4052	4.75686	54.2025	4.38053	52.1419	5.53934	49.8518	9.20164	48.8559	10.3031	68.6038	7.42327	44.2803	7.48293	46.1619	8.28148		1.68936	1.6464	1.4867	1.52923	1.81908	1.88182	1.75741	1.60217
8.20617	5.37634	4.84187	5.99841	5.86036	4.26526	10.1877	6.0461	8.95022	6.9914	10.8957	4.10724	6.50239	4.21314	7.46101	4.23088	5.4656	4.19706	5.87478	4.66722		55.6366	5.82618	56.6188	4.46543	71.6512	4.75686	54.2644	4.38512	52.1579	5.56458	49.8013	9.21541	48.7779	10.3237	68.5832	7.55406	44.3262	7.48522	46.4029	8.29524		1.69659	1.6279	1.49095	1.5271	1.82886	1.87352	1.76188	1.60557
8.19619	5.44564	4.85628	5.98511	5.84484	4.26415	10.2215	6.0533	8.94911	7.0158	10.9307	4.06954	6.58611	4.30074	7.3468	4.1893	5.45119	4.19318	5.86701	4.74983		55.873	5.82618	56.6142	4.45855	73.6774	4.75686	54.409	4.392	52.2727	5.57376	50.866	9.20393	48.5553	10.349	68.5304	7.67339	44.2849	7.48293	46.5153	8.28607		1.69808	1.62748	1.49882	1.52753	1.8312	1.87416	1.77123	1.57729
8.18732	5.50386	4.78587	5.94353	5.83818	4.26747	10.2603	6.0533	8.95521	7.0352	10.9384	4.03849	6.64488	4.36505	7.26751	4.17322	5.44509	4.18985	5.85038	4.76868		55.7881	5.817	56.6119	4.44937	74.804	4.75456	54.6683	4.39659	52.2589	5.58982	52.3185	9.18328	48.2983	10.3673	68.5304	7.77665	44.1908	7.48752	46.5222	8.26771		1.69808	1.6228	1.49882	1.51541	1.84099	1.87182	1.77166	1.58069
8.18288	5.5532	4.70658	5.91026	5.8781	4.26803	10.298	6.06051	9.00178	7.03853	10.8863	4.0335	6.73193	4.39887	7.247	4.16712	5.44731	4.19706	5.82765	4.76036		55.7399	5.79405	56.6624	4.44019	75.0955	4.74538	54.8358	4.38741	52.2153	5.61277	52.6237	9.14427	48.436	10.3719	68.1885	7.87532	44.1885	7.48981	46.5222	8.24017		1.68043	1.62067	1.49223	1.49137	1.85332	1.87161	1.78123	1.5858
8.17845	5.58702	4.67443	5.92135	5.96348	4.26082	10.3308	6.05164	9.07885	7.04019	10.7848	4.03517	6.753	4.40276	7.25698	4.13219	5.47281	4.19706	5.79327	4.75482		55.7491	5.79864	56.7358	4.44019	75.1896	4.74079	54.8702	4.37594	52.213	5.63801	52.61	9.12591	48.748	10.3673	66.9402	7.97399	44.1954	7.4967	46.5245	8.18739		1.66958	1.60621	1.48563	1.48585	1.85672	1.86544	1.78102	1.58494
8.15793	5.6092	4.66168	5.92856	6.03556	4.27634	10.3047	6.04831	9.16478	7.04186	10.7399	4.03517	6.77296	4.42105	7.26751	4.08839	5.51439	4.21203	5.77331	4.75482		55.7468	5.82847	56.7335	4.44019	75.1414	4.73621	54.8496	4.36447	52.2222	5.68391	52.5664	9.13509	48.6608	10.3627	65.4119	8.05889	44.1931	7.51047	46.5107	8.12085		1.66916	1.60345	1.4935	1.49669	1.8665	1.84418	1.78782	1.58409
8.09584	5.61475	4.66667	5.91469	6.07992	4.33401	10.2188	6.05552	9.23797	7.03243	10.7366	4.03517	6.82175	4.43658	7.26807	4.03794	5.55875	4.23199	5.76777	4.75149		55.6963	5.83535	56.8253	4.43331	74.9647	4.73162	54.7417	4.36217	52.2153	5.73668	52.5274	9.13968	48.3924	10.3719	64.3771	8.11626	44.1679	7.51276	46.5429	8.06807		1.6649	1.60132	1.48882	1.49627	1.89479	1.81887	1.79186	1.58367
7.99382	5.61475	4.74373	5.91525	6.11207	4.39998	10.1312	6.04998	9.25959	7.03021	10.7405	4.03627	6.82397	4.43547	7.26696	4.00079	5.55875	4.25361	5.75779	4.74539		55.577	5.84453	56.8666	4.42642	74.6342	4.73162	54.6637	4.392	52.2841	5.76192	52.5274	9.13968	48.2639	10.3673	63.9021	8.18051	44.0692	7.50358	46.7356	8.02906		1.66086	1.60132	1.47776	1.49542	1.90734	1.80994	1.79144	1.58027
7.85244	5.61308	5.02427	5.91192	6.1409	4.44046	10.0918	6.02614	9.25294	7.06625	10.741	4.04126	6.80789	4.43269	7.25642	3.99636	5.52382	4.26969	5.7528	4.74041		55.6045	5.82618	56.8207	4.44478	74.0078	4.76145	54.6706	4.47232	52.369	5.75963	52.4906	9.12591	48.2983	10.3673	63.7552	8.25164	43.8948	7.47605	46.9559	8.00382		1.66108	1.60196	1.4801	1.49456	1.90904	1.80994	1.79633	1.57963
7.67779	5.6153	5.44121	5.91359	6.16752	4.45598	10.0807	5.99564	9.23575	7.08621	10.6939	4.04459	6.88052	4.45155	7.25531	3.9958	5.49443	4.27302	5.75502	4.76813		55.7215	5.75275	56.8023	4.45167	73.7554	4.83029	54.5995	4.55722	52.3897	5.75275	52.4746	9.10756	48.3006	10.3444	63.8286	8.30901	44.0256	7.4508	47.0041	7.98087		1.66108	1.60217	1.48308	1.49456	1.9152	1.80164	1.80653	1.57537
7.52366	5.62362	5.76167	5.92024	6.19468	4.45432	10.084	5.97735	9.21912	7.08399	10.5719	4.05069	7.08344	4.47594	7.24755	3.9958	5.49055	4.28133	5.75557	4.80195		55.772	5.71144	56.745	4.45167	73.8311	4.86471	54.4618	4.61229	52.369	5.76192	52.47	9.10297	48.2478	10.3444	64.0902	8.35949	43.9636	7.44851	46.4763	7.95563		1.6564	1.60642	1.48095	1.49648	1.92435	1.80377	1.80739	1.57537
7.40224	5.62195	5.93798	5.92467	6.2346	4.45487	10.1018	5.98289	9.20803	7.08399	10.4117	4.07065	7.25199	4.49257	7.24256	3.98416	5.49388	4.2963	5.7589	4.80139		55.7399	5.73898	56.6555	4.46084	73.8839	4.8693	54.4388	4.61459	52.3484	5.78028	52.4608	9.11444	48.2019	10.3467	63.5074	8.38474	43.7847	7.4508	45.1156	7.9694		1.6564	1.60642	1.46883	1.49414	1.92796	1.80122	1.80717	1.57516
7.31242	5.63083	6.01505	5.92634	6.2906	4.47261	10.1339	6.0023	9.18641	7.09952	10.323	4.12332	7.35012	4.51309	7.27306	3.93703	5.49443	4.30185	5.75834	4.82135		55.7353	5.74586	56.6715	4.47691	73.8082	4.85782	54.4434	4.60082	52.571	5.78946	52.4861	9.11444	48.1399	10.3582	62.1306	8.39162	44.0577	7.4508	43.4336	8.04971		1.6564	1.59792	1.46819	1.48372	1.93307	1.79845	1.79697	1.57474
7.28525	5.62694	6.05386	5.92523	6.33274	4.50865	10.1683	6.00895	9.15979	7.13888	10.3441	4.19706	7.41499	4.52196	7.31076	3.87216	5.48778	4.30129	5.75945	4.84963		55.5908	5.70456	57.002	4.47691	73.8977	4.81881	54.5421	4.58017	53.0758	5.80552	52.4792	9.10985	47.8623	10.3673	61.1829	8.38474	45.0513	7.44851	41.6667	8.13691		1.6564	1.59366	1.47287	1.50584	1.92881	1.79505	1.77995	1.57899
7.28581	5.63415	6.06938	5.92246	6.3466	4.50865	10.1711	6.01006	9.12875	7.16106	10.4339	4.24696	7.4344	4.51531	7.35955	3.79898	5.48612	4.30185	5.76333	4.8524		55.3292	5.71144	57.7019	4.4792	73.9344	4.79816	54.8243	4.5664	53.2869	5.84224	52.4264	9.11674	47.6925	10.365	60.5404	8.34802	45.2647	7.44392	40.2348	8.17363		1.65661	1.59494	1.48181	1.53731	1.92073	1.79505	1.78038	1.57155
7.29579	5.66908	6.06162	5.91359	6.34272	4.55301	10.1794	6.00784	9.0672	7.15552	10.5132	4.29131	7.43162	4.5081	7.40778	3.72413	5.48834	4.3024	5.76333	4.84686		55.1984	5.74586	58.3283	4.4815	73.9826	4.79357	55.0148	4.59394	53.1056	5.87666	52.4012	9.11444	47.5778	10.3627	59.8428	8.31819	45.2257	7.44163	39.8929	8.17592		1.65661	1.59239	1.48478	1.55305	1.92031	1.79633	1.78165	1.55049
7.33294	5.70235	6.08435	5.91469	6.33385	4.61677	10.1827	5.98178	8.98016	7.1411	10.4555	4.35341	7.4416	4.50366	7.43661	3.68199	5.49333	4.30407	5.76555	4.83743		55.0699	5.7734	58.5646	4.4815	74.1845	4.79357	54.9804	4.61	53.2158	5.89502	52.3621	9.10985	47.5938	10.3811	59.1704	8.31819	45.1133	7.43704	40.1453	8.17592		1.65576	1.59919	1.48521	1.5522	1.9118	1.79803	1.78569	1.56091
7.3784	5.71953	6.0899	5.91747	6.33329	4.67221	10.1822	5.90139	8.95743	7.1533	10.3707	4.37559	7.44937	4.49424	7.46156	3.74187	5.49333	4.31626	5.765	4.82523		55.0033	5.79864	58.3811	4.44708	74.1891	4.80046	54.8679	4.61	53.5255	5.8996	52.1051	9.10297	47.8508	10.4247	58.365	8.33884	45.0307	7.45539	41.2261	8.17363		1.65619	1.60238	1.49159	1.54177	1.91138	1.78463	1.77825	1.56347
7.39392	5.72009	6.08324	5.92079	6.33773	4.76425	10.1877	5.80325	8.95022	7.15164	10.4489	4.37115	7.44715	4.49701	7.46156	3.7951	5.4961	4.33733	5.765	4.79917		55.1226	5.81241	57.6445	4.41954	74.0399	4.80275	54.7784	4.60311	53.6357	5.89731	51.8734	9.11444	48.1078	10.4912	57.5802	8.33425	44.9458	7.56783	43.0458	8.18051		1.65597	1.60217	1.49308	1.54177	1.90457	1.77123	1.77931	1.56049
7.37452	5.71843	6.07992	5.91913	6.34937	4.8269	10.2038	5.73062	8.91307	7.04851	10.5137	4.37337	7.41499	4.50754	7.42497	3.80896	5.49443	4.35341	5.76444	4.76314		55.1525	5.79864	57.0846	4.41036	73.9481	4.78898	54.6545	4.59394	53.7596	5.90649	51.7449	9.10526	48.1399	10.5578	57.1924	8.30901	45.1018	7.76517	43.1628	8.18969		1.65406	1.6026	1.49329	1.5422	1.9067	1.77698	1.78017	1.55411
7.32905	5.71621	6.0899	5.91913	6.3588	4.84408	10.2032	5.61419	8.90143	6.91267	10.5165	4.37171	7.36066	4.51198	7.38949	3.84555	5.5083	4.35008	5.76389	4.72821		55.0102	5.80093	58.0415	4.40118	73.9344	4.75456	54.4136	4.57787	54.1566	5.9455	51.5888	9.02265	47.9495	10.5876	57.0754	8.29065	45.4345	7.90056	43.3074	8.17822		1.65533	1.60664	1.49308	1.5422	1.89649	1.77357	1.78059	1.54986
7.30577	5.72286	6.13591	5.91081	6.36379	4.85628	10.2221	5.47447	8.91473	6.81066	10.517	4.37171	7.3285	4.50588	7.37507	3.90321	5.52216	4.34565	5.76389	4.69938		54.806	5.83765	59.4251	4.38283	74.0193	4.75456	54.5283	4.56411	54.3929	6.01434	51.419	8.95381	47.7361	10.622	57.1833	8.27689	45.7833	7.93268	43.803	8.13921		1.65533	1.6094	1.49627	1.5539	1.88756	1.7925	1.77591	1.53773
7.29856	5.72508	6.203	5.89862	6.36711	4.86515	10.257	5.39464	8.96574	6.74579	10.5315	4.37503	7.30743	4.50699	7.37563	3.91319	5.52216	4.34399	5.76389	4.67609		54.5123	5.87207	59.5973	4.36447	74.1111	4.83029	55.0653	4.53198	54.4985	6.06482	51.4167	8.91481	47.5915	10.6633	57.298	8.26312	45.8958	7.91433	43.9017	8.08413		1.66065	1.60451	1.50031	1.5539	1.88224	1.79973	1.78569	1.5186
7.30133	5.72508	6.29781	5.89307	6.36878	4.86349	10.2809	5.35472	9.07718	6.73415	10.562	4.37392	7.30521	4.55023	7.37008	3.91319	5.5277	4.35618	5.76389	4.65502		53.9982	5.88813	58.9983	4.34611	74.1615	4.87389	55.7789	4.50674	55.6917	6.08777	51.3135	8.95152	47.6282	10.6702	57.3003	8.24706	45.8843	7.91662	43.8833	8.04512		1.65597	1.61323	1.49584	1.55305	1.8631	1.79973	1.78761	1.51307
7.32905	5.71787	6.41202	5.89363	6.37044	4.85517	10.2847	5.34695	9.19417	6.73914	10.5692	4.38058	7.33737	4.61677	7.36398	3.90376	5.51717	4.39222	5.76167	4.65059		53.5255	5.88584	58.4247	4.32775	74.1133	4.89454	56.9331	4.51362	56.9446	6.10613	50.9624	9.05937	47.7177	10.6565	57.3255	8.24017	45.8682	7.94645	43.4106	8.04971		1.66235	1.62748	1.48372	1.55262	1.85927	1.78952	1.78931	1.51307
7.35678	5.68793	6.52845	5.8964	6.38319	4.88234	10.2742	5.34695	9.24351	6.73138	10.5803	4.40331	7.43384	4.65336	7.36398	3.90321	5.4523	4.4083	5.74892	4.65059		53.5416	5.87666	58.0782	4.3071	73.916	4.95879	57.9956	4.50903	57.5068	6.12907	50.4599	9.13509	47.7384	10.606	57.3622	8.24476	45.8682	7.95104	42.619	8.08184		1.66958	1.62896	1.47968	1.55347	1.86438	1.79207	1.79037	1.51923
7.35733	5.68017	6.62936	5.89141	6.39982	4.93113	10.2642	5.33143	9.25682	6.70753	10.6285	4.41828	7.53752	4.71379	7.35844	3.90376	5.39297	4.41495	5.72619	4.64837		53.8124	5.8583	57.8831	4.28186	73.7095	5.06893	57.9933	4.49297	57.6881	6.14055	50.1042	9.16951	47.7292	10.5555	58.0277	8.25164	45.8751	7.94416	42.2771	8.09561		1.66873	1.62599	1.475	1.54922	1.84885	1.80228	1.80037	1.53795
7.33183	5.71953	6.70532	5.88143	6.40204	4.95663	10.2459	5.33309	9.26236	6.68591	10.6612	4.39278	7.58021	4.83854	7.32296	3.90376	5.39519	4.42826	5.69736	4.64615		53.9363	5.84683	57.789	4.2658	73.7095	5.15843	58.5784	4.48838	57.5871	6.14055	49.9711	9.1741	47.4768	10.528	58.7345	8.25164	45.8797	7.9258	42.2289	8.0979		1.64172	1.61876	1.46798	1.52625	1.83163	1.80866	1.81036	1.54348
7.3102	5.76167	6.73193	5.88198	6.40204	4.98546	10.2121	5.25215	9.2546	6.67704	10.6839	4.34842	7.58243	4.90119	7.23147	3.91374	5.3902	4.44046	5.68959	4.64726		54.0258	5.85371	57.8372	4.2635	73.8678	5.17219	59.0396	4.48609	57.018	6.14513	49.9482	9.08691	47.4929	10.5119	58.9088	8.25164	45.8774	7.87302	42.144	8.08872		1.63215	1.6128	1.47287	1.51541	1.82716	1.80611	1.81419	1.53412
7.31187	5.77553	6.74413	5.88032	6.40426	5.00321	10.2121	5.00931	9.24684	6.67649	10.8187	4.3329	7.57522	4.91117	7.12558	3.92206	5.35527	4.43879	5.70346	4.64892		54.1841	5.9019	57.8831	4.25891	74.1248	5.14695	59.0465	4.49068	55.7835	6.14743	50.0789	8.99741	47.7705	10.5142	58.9249	8.21493	45.8659	7.82713	42.0086	8.06348		1.63407	1.6211	1.47691	1.50009	1.80739	1.80866	1.81398	1.54177
7.32406	5.74892	6.77961	5.88032	6.40204	5.00043	10.3125	4.76036	9.25183	6.67649	11.1264	4.34066	7.57079	4.91062	7.04907	3.91873	5.32422	4.44157	5.7029	4.64892		54.2851	5.95468	57.8831	4.26809	74.0996	5.14466	59.0488	4.49526	54.2002	6.14513	50.2029	8.96758	47.6902	10.4637	58.8125	8.13691	45.8613	7.79042	41.8457	8.013		1.63386	1.62577	1.47053	1.48457	1.76443	1.80866	1.81419	1.56985
7.33848	5.75003	6.82008	5.86036	6.38375	4.99156	10.4683	4.64726	9.26403	6.67704	11.3631	4.34232	7.57689	4.91117	6.98586	3.92816	5.28708	4.44434	5.70401	4.65447		53.9363	5.97303	57.929	4.31857	73.8908	5.14695	59.0213	4.49985	52.8807	6.14743	50.0629	8.96299	47.6305	10.2274	58.7735	8.09561	45.8545	7.73764	41.7676	7.9671		1.63577	1.62301	1.45331	1.49244	1.75784	1.80334	1.81355	1.60706
7.34569	5.75668	6.82951	5.85038	6.36711	4.96495	10.5969	4.60346	9.27567	6.67815	11.4285	4.35341	7.59685	4.92836	6.95814	3.98194	5.2527	4.43935	5.70789	4.66445		53.1102	5.97762	57.9244	4.41495	73.6934	5.14466	58.7712	4.50903	51.9445	6.14513	49.7875	8.96758	47.5594	9.87627	58.6931	8.08184	45.9095	7.71699	41.8135	7.94645		1.63598	1.62365	1.41865	1.50435	1.75784	1.79803	1.81334	1.64258
7.3407	5.7528	6.84171	5.85149	6.35436	4.91117	10.6512	4.6079	9.28177	6.67815	11.4396	4.39388	7.63787	4.93889	6.95703	4.02408	5.25159	4.43214	5.73173	4.65502		52.4379	5.9868	58.5486	4.51362	73.5718	5.14007	58.4958	4.5228	51.084	6.14743	49.4754	8.97676	47.5273	9.64681	58.264	8.08643	46.0311	7.71469	41.8732	7.93957		1.63662	1.62301	1.40993	1.48904	1.75954	1.77804	1.81121	1.64981
7.32074	5.74227	6.88274	5.83929	6.35048	4.84076	10.5997	4.60734	9.25626	6.67649	11.4064	4.42161	7.68056	5.00875	6.95592	4.01022	5.26989	4.43325	5.8282	4.63728		52.0684	5.99369	60.0355	4.61229	73.2804	5.14466	58.2778	4.54575	50.4002	6.14055	49.1083	8.96988	47.5869	9.61009	57.9795	8.08413	46.0816	7.70781	41.9237	7.91892		1.64662	1.62344	1.40993	1.48606	1.75932	1.75018	1.81143	1.64768
7.30189	5.7334	6.91877	5.80214	6.40537	4.77755	10.4877	4.61178	9.20304	6.67261	11.352	4.4338	7.69831	5.15956	6.94428	3.96309	5.28486	4.45543	5.9463	4.66223		51.8986	5.98451	61.1484	4.72703	73.0165	5.16301	58.1746	4.54116	50.3382	6.13137	48.7825	8.94464	47.5846	9.61239	58.0116	8.07495	46.022	7.71928	41.9283	7.87761		1.63853	1.6228	1.41163	1.48372	1.75975	1.74252	1.81355	1.65895
7.30189	5.74393	6.91877	5.7528	6.52956	4.74872	10.4428	4.61178	9.1293	6.67593	11.3736	4.44877	7.71549	5.17508	6.88883	3.91374	5.28708	4.4837	6.02558	4.66999		51.8481	5.96615	62.2017	4.8234	73.0922	5.20432	58.287	4.4792	50.1707	6.13137	48.6769	8.92398	47.6764	9.54813	58.1126	8.07495	46.0495	7.71928	41.7952	7.83401		1.63875	1.62301	1.40397	1.48372	1.75762	1.74104	1.81355	1.67277
7.30632	5.76112	6.95093	5.71565	6.60607	4.7465	10.4533	4.6079	9.05445	6.68425	11.4612	4.44489	7.75708	5.13516	6.87276	3.86385	5.2904	4.49535	6.07604	4.63562		51.7678	5.97992	63.1953	4.88995	73.0188	5.26398	58.326	4.42872	49.4433	6.13137	48.7021	8.92398	47.6351	9.48618	58.3306	8.07725	46.1367	7.74223	41.724	7.82254		1.64109	1.62003	1.40121	1.44629	1.75954	1.74571	1.81185	1.67766
7.3041	5.7783	6.99529	5.68072	6.63269	4.74706	10.3978	4.6079	9.03172	6.70199	11.4768	4.43048	7.81973	5.10356	6.88828	3.80729	5.31203	4.49812	6.11429	4.6517		51.7311	6.02352	63.3445	4.95649	72.6998	5.3397	58.2962	4.38283	48.6838	6.13137	48.7182	8.88039	47.681	9.45635	58.4614	8.08413	46.0724	7.795	41.6598	7.83172		1.63853	1.62067	1.40014	1.43396	1.76018	1.75911	1.81164	1.6783
7.3285	5.80991	7.01469	5.65577	6.63823	4.75038	10.303	4.60679	9.03227	6.74579	11.4047	4.43103	7.86741	5.09025	6.83284	3.74353	5.33309	4.49701	6.13092	4.73985		52.0937	6.07859	63.3949	5.01845	72.592	5.39478	58.1447	4.34152	48.2639	6.13137	48.7159	8.71287	47.938	9.40816	58.3122	8.10479	46.2101	7.82942	41.5451	7.83172		1.64343	1.62173	1.39759	1.42992	1.76507	1.76018	1.81058	1.66873
7.31852	5.83208	7.01524	5.66354	6.63989	4.75371	10.2792	4.6079	9.03061	6.79957	11.3592	4.42992	7.90234	5.0897	6.73914	3.6953	5.3647	4.49424	6.14201	4.85295		52.7522	6.17267	63.4454	5.04599	72.5966	5.39478	58.1723	4.30481	48.0367	6.13137	48.6884	8.36179	48.436	9.38521	58.2503	8.13003	46.9352	7.83631	41.8709	7.85696		1.64385	1.62173	1.41056	1.41673	1.76613	1.76081	1.80675	1.66533
7.26862	5.83597	7.02578	5.65633	6.63379	4.75648	10.2714	4.6151	9.05722	6.81898	11.3376	4.43048	7.9345	5.0897	6.64932	3.69363	5.44675	4.4959	6.16142	4.94056		53.8101	6.28281	63.4752	5.05975	72.553	5.29381	57.8441	4.2658	47.7912	6.13137	48.6058	7.9671	49.0418	9.38521	58.3191	8.15297	47.2129	7.82713	42.6075	7.87073		1.64385	1.62173	1.42736	1.41694	1.76124	1.76081	1.81951	1.66384
7.2531	5.83153	7.02467	5.61475	6.65486	4.7648	10.1666	4.63894	9.06609	6.80844	11.3115	4.42937	7.98051	5.09025	6.63601	3.66979	5.56984	4.49424	6.1653	4.9655		55.3223	6.32871	63.7139	5.07582	72.5323	5.1263	57.8671	4.21531	47.7751	6.15431	48.5209	7.81336	49.6453	9.33932	58.3512	8.15527	47.2037	7.81336	43.1123	7.86614		1.64385	1.62173	1.3978	1.41694	1.75656	1.76953	1.83227	1.66384
7.25975	5.8221	7.00305	5.61475	6.7347	4.7332	9.99422	4.66112	9.06554	6.79957	11.291	4.41384	8.04538	5.09635	6.62492	3.61324	5.66631	4.55467	6.18803	4.97105		56.3755	6.3333	64.0535	5.09417	72.5346	5.00239	58.2663	4.19007	47.8485	6.18873	48.5828	7.81107	50.0835	9.32096	58.3489	8.09102	47.2221	7.81566	43.9843	7.87761		1.65427	1.6313	1.37186	1.41779	1.74593	1.77293	1.82823	1.66703
7.26862	5.82321	6.97588	5.65411	6.78349	4.63506	9.81901	4.68552	9.02507	6.80012	11.2772	4.41994	8.09972	5.11132	6.62049	3.52398	5.69957	4.65779	6.27009	4.97438		56.5591	6.32412	64.3128	5.11942	72.5484	4.93125	58.5807	4.18089	47.5961	6.18873	48.6884	7.82713	50.1088	9.33244	58.3948	7.97628	47.3873	7.79959	45.9577	7.87302		1.65555	1.63853	1.38037	1.42545	1.73232	1.76251	1.83482	1.65959
7.27195	5.80492	6.97588	5.64524	6.8029	4.55744	9.67098	4.71157	8.97628	6.79458	11.2639	4.42382	8.10692	5.12629	6.62271	3.39036	5.70068	4.74983	6.33717	4.97826		56.1369	6.30347	64.462	5.13777	72.5667	4.86471	58.7299	4.17401	47.3506	6.18873	48.8146	7.85696	49.8678	9.33932	58.5188	7.91433	47.5755	7.76976	47.1624	7.85696		1.65129	1.64662	1.38228	1.39291	1.72658	1.75954	1.85396	1.65852
7.26696	5.79715	6.98752	5.6031	6.809	4.55412	9.5989	4.70936	8.97239	6.79902	11.2628	4.41994	8.08696	5.13239	6.6216	3.27337	5.67407	4.85739	6.37487	4.97049		55.5013	6.25757	64.4138	5.14007	72.5851	4.79128	58.7803	4.15336	47.3666	6.19103	49.0601	7.96022	49.8632	9.36686	58.427	7.90056	47.5319	7.78124	47.1257	7.85696		1.65916	1.65406	1.39228	1.40695	1.72296	1.75954	1.86969	1.67256
7.26585	5.79826	6.99085	5.52992	6.809	4.60512	9.5978	4.70049	8.97572	6.84448	11.2694	4.41551	8.06978	5.13294	6.62936	3.21128	5.6336	4.99101	6.39151	4.95608		55.4278	6.19103	64.4138	5.14007	72.5484	4.75456	58.801	4.13271	47.5181	6.18414	49.2001	8.1002	50.1294	9.38751	58.6014	7.89597	47.1808	7.76288	47.922	7.87073		1.66001	1.65406	1.39929	1.41163	1.70892	1.73891	1.87501	1.68043
7.26696	5.80214	6.98974	5.41071	6.81399	4.64005	9.60667	4.72377	8.99291	6.90048	11.2672	4.41662	8.07144	5.13516	6.65375	3.17524	5.63083	5.09025	6.38596	4.95608		55.9327	6.14743	64.5308	5.14007	72.5438	4.72703	58.7987	4.12123	47.7292	6.17038	49.2001	8.16215	50.3382	9.35997	60.1319	7.89826	47.0018	7.65962	49.4502	7.89138		1.66065	1.67341	1.39972	1.41078	1.70127	1.70488	1.89202	1.67575
7.26918	5.82432	6.98919	5.21888	6.81232	4.64837	9.6355	4.76924	9.04447	6.89604	11.2539	4.41772	8.06701	5.13682	6.73526	3.16692	5.66631	5.11742	6.41147	4.94166		56.3549	6.13825	64.7557	5.13548	72.5622	4.70867	58.7964	4.11205	47.6925	6.1589	49.659	8.21722	50.157	9.34161	61.5684	7.90056	47.0018	7.58848	51.0725	7.89138		1.66001	1.6985	1.40014	1.41992	1.70021	1.70169	1.90478	1.6749
7.27694	5.83818	7.00249	5.01319	6.80123	4.66278	9.67763	4.79308	9.06221	6.87442	11.2506	4.38723	8.06257	5.13516	6.9598	3.1636	5.72342	5.12186	6.47412	4.88567		56.4857	6.13366	64.9163	5.13089	72.6562	4.72244	59.1452	4.10058	47.6076	6.1612	50.6159	8.37097	50.3382	9.33932	61.7336	7.90744	46.9811	7.58389	52.2405	7.88679		1.66831	1.69702	1.40504	1.43289	1.70233	1.70488	1.89862	1.6749
7.27583	5.82321	7.02467	4.88179	6.79569	4.69272	9.66488	4.79363	9.07386	6.86943	11.2639	4.33345	8.05702	5.14237	7.32351	3.12756	5.8282	5.25381	6.50184	4.79751		56.5362	6.13366	64.9163	5.1263	72.9706	4.74768	59.1865	4.0937	47.6076	6.16579	50.5952	8.46734	51.3341	9.29343	61.7038	7.91892	46.9559	7.5816	52.6903	7.89138		1.66575	1.69468	1.40248	1.43226	1.69276	1.70106	1.89904	1.67639
7.25476	5.80713	7.03742	4.85018	6.7907	4.70437	9.67597	4.78531	9.16257	6.89105	11.2761	4.24918	8.05536	5.19615	7.72215	3.06269	5.98954	5.41626	6.50406	4.79197		56.8	6.13137	64.9071	5.12859	73.184	4.75456	59.276	4.09599	47.6076	6.18873	50.8362	8.48341	52.2382	9.22688	61.9975	7.93039	46.9444	7.51047	52.7591	7.90056		1.66299	1.69064	1.39802	1.43247	1.65767	1.69957	1.89904	1.67426
7.23369	5.8027	7.04186	4.85018	6.77573	4.70658	9.66987	4.78531	9.22466	6.91988	11.2799	4.17322	8.05647	5.24438	8.02431	3.06158	6.16419	5.50608	6.50517	4.79308		57.0226	6.12907	64.7235	5.1263	73.1725	4.75456	59.2209	4.11894	47.5823	6.21168	51.185	8.46964	52.8394	9.16263	62.064	7.93498	46.9582	7.33378	52.688	7.90056		1.65427	1.68149	1.40078	1.438	1.6379	1.70744	1.89777	1.68022
7.20431	5.80381	7.04019	4.76203	6.75688	4.72377	9.6549	4.78698	9.24185	6.91766	11.2744	4.16102	8.05592	5.27488	8.16847	3.06158	6.28561	5.55653	6.50295	4.79308		57.0639	6.1176	64.6731	5.124	73.1496	4.75227	59.1452	4.17631	47.5709	6.21856	51.5567	8.41457	53.459	9.14657	62.4059	7.94875	46.9146	7.23969	52.4975	7.89597		1.65385	1.66044	1.40142	1.44374	1.63917	1.72785	1.895	1.69298
7.17603	5.80325	7.02911	4.60346	6.71641	4.77811	9.64548	4.78809	9.24129	6.91656	11.2683	4.16102	8.06645	5.28763	8.20561	3.06158	6.35048	5.56374	6.49907	4.79474		57.0685	6.06941	65.2559	5.1263	73.0463	4.74309	58.9433	4.2199	47.5778	6.22545	52.1832	8.41686	53.9891	9.15804	63.0897	7.98087	46.6874	7.26494	52.2497	7.87761		1.65789	1.67639	1.39695	1.46415	1.63109	1.78378	1.89564	1.68596
7.1533	5.81711	6.98253	4.53471	6.63102	4.86903	9.64492	4.78753	9.24296	6.97311	11.2273	4.15991	8.07865	5.2588	8.21559	3.06214	6.38596	5.5521	6.48133	4.80805		57.0731	6.01663	65.0746	5.1263	72.849	4.74079	59.0442	4.23826	47.6604	6.24151	52.4172	8.47882	54.0028	9.15804	63.2458	7.99235	46.5887	7.31771	52.1051	7.85696		1.66278	1.6732	1.3893	1.46777	1.59983	1.8227	1.905	1.65108
7.10229	5.85426	6.94428	4.55079	6.5473	4.884	9.64659	4.78975	9.2424	7.05849	11.0099	4.13385	8.06312	5.24383	8.22557	3.05936	6.38097	5.54489	6.45582	4.83688		57.0708	6.00516	64.0351	5.11942	72.3809	4.74079	58.9708	4.26121	47.759	6.26446	52.3415	8.53618	54.5031	9.07084	63.3881	7.98776	46.8572	7.40032	52.135	7.85237		1.66427	1.67384	1.40078	1.46798	1.59154	1.80887	1.90563	1.61769
7.01968	5.8903	6.9476	4.56909	6.51182	4.88456	9.63439	4.79141	9.23797	7.08732	10.7094	3.98471	8.05813	5.23662	8.23223	3.06214	6.37598	5.54489	6.44141	4.87458		57.0387	6.02122	62.9131	5.11024	71.6994	4.74079	58.661	4.29333	47.6122	6.31035	52.252	8.55913	55.219	8.85744	63.9342	7.98317	47.2267	7.47605	52.1396	7.86614		1.66171	1.66916	1.42311	1.46479	1.59239	1.79569	1.90308	1.60706
6.97422	5.90693	6.98641	4.56909	6.50239	4.87236	9.57451	4.79917	9.23797	7.10063	10.573	3.87493	8.05647	5.22443	8.24054	3.07322	6.34993	5.54544	6.42533	4.87513		57.0157	6.05335	61.7565	5.11024	70.9283	4.74538	58.4407	4.29333	46.988	6.36772	52.2038	8.55454	55.1731	8.68993	64.3816	7.95334	47.58	7.51276	52.0684	7.90056		1.65895	1.67235	1.42481	1.46352	1.59303	1.78272	1.89117	1.61004
6.96368	5.90305	7.0341	4.56188	6.50572	4.82634	9.48968	4.80915	9.28177	7.11227	10.5276	3.8328	8.05037	5.22664	8.2605	3.07988	6.32719	5.54711	6.4026	4.85905		57.0662	6.05564	61.1668	5.11253	70.4602	4.75227	58.1837	4.28645	46.334	6.39296	52.2291	8.54995	54.9735	8.61879	64.4757	7.9258	48.2524	7.58389	51.9996	7.95104		1.6481	1.66129	1.41801	1.46373	1.59175	1.76273	1.84737	1.61004
6.96368	5.88919	7.09453	4.56132	6.49962	4.75094	9.43202	4.80915	9.33389	7.10839	10.4987	3.8023	8.03097	5.23219	8.28157	3.09263	6.32664	5.51218	6.39262	4.8646		57.1924	6.02352	61.1875	5.11483	70.5612	4.75686	58.0047	4.31857	45.8384	6.41361	52.3713	8.54995	54.8565	8.58437	64.5973	7.94186	49.1083	7.74682	51.9629	7.97399		1.63024	1.65491	1.39228	1.4633	1.57367	1.74954	1.81759	1.606
6.95647	5.85981	7.15385	4.56188	6.48576	4.70049	9.42259	4.81304	9.31503	7.10617	10.5126	3.80341	7.99936	5.22886	8.29044	3.11148	6.32719	5.49499	6.38818	4.87846		57.8671	5.98451	60.8249	5.124	69.9623	4.74768	57.9359	4.35529	45.3978	6.44344	52.6146	8.51324	54.8886	8.54766	64.7694	7.97399	49.6521	7.81795	51.956	7.95104		1.64109	1.65108	1.38292	1.46522	1.54007	1.77506	1.81568	1.5943
6.95758	5.80214	7.20098	4.5652	6.46691	4.69217	9.4165	4.82523	9.24019	7.10784	10.5209	3.80286	7.97053	5.23441	8.28989	3.1076	6.3466	5.49443	6.39095	4.87014		59.7303	5.94091	60.3109	5.13548	68.6566	4.75915	58.1791	4.38512	45.2923	6.47786	52.5457	8.47423	55.0974	8.50635	64.8521	7.95334	49.604	7.80648	51.9491	7.91433		1.65236	1.62769	1.38334	1.47309	1.54624	1.82121	1.81653	1.58835
6.96091	5.75391	7.24922	4.56909	6.4525	4.68607	9.39487	4.82523	9.24407	7.10562	10.4805	3.80286	7.93782	5.26712	8.2727	3.1137	6.37986	5.49443	6.42976	4.87569		60.9924	5.91567	59.4527	5.13777	67.7594	4.77063	58.3444	4.4379	45.6296	6.53064	52.33	8.46734	55.281	8.46505	64.8796	7.95793	50.2212	7.87761	52.0019	7.91662		1.64619	1.606	1.37867	1.48117	1.5371	1.83439	1.81844	1.5892
6.96202	5.7273	7.28414	4.56798	6.4464	4.68496	9.3799	4.82135	9.32723	7.09342	10.4544	3.81062	7.89846	5.32977	8.25163	3.11869	6.38707	5.49499	6.48909	4.88899		61.0268	5.9019	58.1264	5.13548	67.1697	4.76374	58.583	4.54804	45.306	6.59719	52.571	8.47193	55.2901	8.41457	65.0081	7.98546	51.3295	8.04512	53.0322	7.85467		1.64534	1.60153	1.37484	1.48287	1.53327	1.83035	1.82185	1.5926
6.96257	5.71953	7.29634	4.57241	6.44584	4.68496	9.38766	4.82412	9.46196	7.09009	10.4428	3.81062	7.85798	5.40295	8.23722	3.12091	6.38485	5.50608	6.53621	4.90618		61.0681	5.88584	57.0915	5.14236	66.9448	4.74997	58.9249	4.68572	44.6016	6.65455	53.0781	8.46046	55.5036	8.40768	65.054	7.98087	51.8757	8.1828	54.1543	7.80189		1.64045	1.59877	1.37356	1.47989	1.53327	1.821	1.79697	1.59303
6.96368	5.72009	7.30799	4.57019	6.44806	4.68496	9.39986	4.8402	9.57451	7.10285	10.4167	3.79842	7.82694	5.44731	8.23278	3.12091	6.40703	5.51439	6.56116	4.92281		61.1829	5.88125	56.605	5.15154	66.9448	4.72244	58.9318	4.77292	44.1954	6.70733	53.8537	8.45358	55.7009	8.46046	64.9071	7.99235	52.0478	8.21034	54.4411	7.8386		1.61025	1.59643	1.37229	1.47947	1.5288	1.83057	1.77995	1.5926
7.00083	5.71676	7.32961	4.57075	6.45416	4.68496	9.40596	4.8524	9.59558	7.1217	10.3607	3.7951	7.8164	5.46117	8.23056	3.11924	6.46081	5.5155	6.57392	4.90285		61.3412	5.88125	56.4306	5.16301	66.9173	4.67425	58.9387	4.78669	44.0692	6.73716	55.7858	8.44669	55.5816	8.48111	64.579	8.02447	52.1648	8.19887	54.4274	7.93039		1.56134	1.59388	1.37229	1.48032	1.50647	1.83078	1.78314	1.5926
7.09342	5.70955	7.33127	4.57075	6.46026	4.68607	9.41871	4.8585	9.60833	7.13112	10.2958	3.78456	7.8164	5.47115	8.14962	3.10205	6.48909	5.51938	6.57891	4.87735		61.6464	5.88813	56.5912	5.1676	66.9173	4.64442	58.941	4.79587	44.0371	6.75322	56.27	8.38933	55.694	8.41686	64.2118	8.06578	52.2658	8.17822	54.471	8.02218		1.55964	1.59026	1.36888	1.47564	1.50498	1.82142	1.78314	1.58984
7.1533	5.73173	7.4599	4.56909	6.47301	4.68607	9.43923	4.86072	9.81402	7.11782	10.247	3.72635	7.79644	5.4778	7.96055	3.09152	6.49297	5.52216	6.57835	4.84519		62.0893	5.88813	56.9698	5.16531	66.7865	4.63065	59.2439	4.84635	44.0646	6.77388	54.4251	8.3159	55.9969	8.33425	63.707	8.08413	52.2749	8.15297	54.5949	8.06348		1.55475	1.5892	1.36654	1.46394	1.50456	1.81887	1.77931	1.58601
7.14886	5.77442	7.69553	4.56354	6.45194	4.68607	9.44255	4.84741	10.4644	7.11892	10.262	3.72524	7.74931	5.48057	7.78702	3.09152	6.49297	5.52437	6.56449	4.81137		62.3646	5.88125	57.1029	5.16072	66.7842	4.60311	59.9896	4.88765	44.0807	6.78994	53.6196	8.28148	56.1575	8.23788	62.4839	8.08184	52.2979	8.13003	54.5834	7.97169		1.53922	1.58771	1.36995	1.46224	1.5052	1.82206	1.77698	1.5792
7.15108	5.8027	7.8724	4.56354	6.37543	4.69106	9.44422	4.84963	11.2084	7.17492	10.3047	3.69086	7.70884	5.50275	7.67835	3.10316	6.4974	5.54267	6.51016	4.77589		62.5344	5.89731	56.9354	5.17908	66.8117	4.58705	59.9759	4.91519	44.0807	6.79453	53.5737	8.26771	56.13	8.18739	60.6872	8.08413	52.4103	8.10938	54.3906	7.83172		1.53114	1.57665	1.39355	1.47032	1.52072	1.82121	1.77612	1.56921
7.15552	5.81989	7.96166	4.57186	6.29947	4.69161	9.44865	4.86903	11.5999	7.24423	10.3313	3.68643	7.69443	5.50497	7.58354	3.12756	6.5096	5.58481	6.45416	4.77977		62.5092	5.89272	56.8046	5.20661	67.0458	4.58246	60.2925	4.93814	44.0577	6.79912	53.5577	8.30442	56.3824	8.23329	59.5376	8.08643	52.5136	8.13462	54.2415	7.7101		1.52731	1.56517	1.41397	1.46607	1.53178	1.821	1.75613	1.569
7.16605	5.81046	7.96166	4.56132	6.24126	4.69161	9.38268	4.86682	11.7651	7.27749	10.3557	3.71858	7.69221	5.49055	7.50204	3.13199	6.51958	5.60976	6.42588	4.79141		62.5367	5.89043	56.8482	5.23185	67.1766	4.57787	60.4279	4.92666	44.0853	6.81288	53.5737	8.35032	57.4494	8.24706	59.2117	8.0979	52.5778	8.1851	54.2575	7.61373		1.52731	1.56559	1.40099	1.46968	1.54007	1.82312	1.71764	1.57282
7.24922	5.81323	7.93727	4.51697	6.21187	4.69217	9.24074	4.8463	11.851	7.28803	10.3779	3.75351	7.69332	5.47669	7.41832	3.13255	6.53178	5.61087	6.40592	4.7892		62.5826	5.88813	56.8161	5.25021	67.1307	4.56411	60.4669	4.90601	44.0876	6.81977	53.5783	8.38015	58.7459	8.23329	58.9846	8.10938	52.6237	8.25164	54.1313	7.55406		1.52604	1.54539	1.41397	1.46819	1.54284	1.82504	1.70935	1.57261
7.47764	5.821	7.9284	4.4837	6.21409	4.69605	9.15536	4.85517	11.8793	7.29468	10.3779	3.76128	7.69332	5.45951	7.32185	3.13366	6.55839	5.61142	6.39927	4.78809		62.5138	5.89502	56.8689	5.24792	66.8943	4.56411	60.4669	4.89454	44.1082	6.82665	53.6036	8.40998	59.3701	8.19198	58.248	8.10708	52.6352	8.35261	53.8216	7.49899		1.52306	1.52838	1.41546	1.46415	1.54071	1.83652	1.71297	1.57325
7.69387	5.87533	7.9223	4.47982	6.24015	4.6955	9.12985	4.86571	11.8699	7.32074	10.3729	3.75795	7.68666	5.47115	7.26252	3.1392	6.6155	5.61197	6.422	4.79197		62.3302	5.93861	56.9354	5.23185	66.02	4.55493	60.7721	4.90142	44.3537	6.8473	53.6242	8.43063	59.4458	8.1415	57.9611	8.07725	52.5939	8.46505	53.358	7.42556		1.52753	1.53008	1.41822	1.46415	1.54901	1.83609	1.71254	1.57452
7.75042	5.98677	7.92396	4.50422	6.27064	4.69605	9.111	4.86792	11.8638	7.34014	10.3485	3.74908	7.67114	5.48445	7.25032	3.14364	6.72195	5.63138	6.43254	4.81414		62.3463	5.9891	56.8781	5.21809	64.3243	4.55952	61.1462	4.91978	45.2464	6.88631	53.6655	8.42145	59.4481	8.11396	57.9726	7.98546	52.5526	8.55225	53.0919	7.35672		1.52816	1.51094	1.4195	1.47628	1.57219	1.83928	1.70744	1.57261
7.72437	6.02281	7.9284	4.52251	6.30945	4.69605	9.12708	4.87014	11.9087	7.34846	10.3612	3.74908	7.66338	5.48556	7.24533	3.14752	6.91157	5.69791	6.43364	4.84575		62.6056	6.04187	56.8804	5.21809	63.4202	4.57328	61.1783	4.92896	46.7654	6.94368	53.7068	8.41457	59.4366	8.12314	57.6445	7.89368	52.5549	8.55454	53.1033	7.29018		1.53114	1.50775	1.41737	1.48797	1.57516	1.83631	1.72275	1.56963
7.72381	6.02004	7.92008	4.52362	6.33828	4.69938	9.23298	4.87014	11.9808	7.3601	10.3624	3.75407	7.66393	5.51495	7.23369	3.14863	7.09896	5.77498	6.43364	4.86349		62.8121	6.09695	57.0203	5.21809	63.3858	4.56869	61.1117	4.91748	48.2707	7.01252	53.7091	8.39162	59.4435	8.15986	57.2223	7.8409	52.6008	8.62797	53.163	7.1938		1.52242	1.51073	1.41758	1.49754	1.5758	1.82759	1.77995	1.569
7.73379	6.02835	7.90345	4.52418	6.3405	4.70825	9.38157	4.87901	11.9929	7.3601	10.3707	3.74963	7.66171	5.51772	7.2226	3.17469	7.22371	5.79327	6.43198	4.86737		62.9406	6.11989	57.0112	5.2112	63.3835	4.57099	60.8318	4.90142	49.2712	7.04235	53.6655	8.29524	59.4435	8.18739	56.41	7.79959	52.8417	8.71287	53.1515	7.06759		1.51115	1.50435	1.41758	1.48712	1.58282	1.82504	1.80632	1.5741
7.69664	6.04665	7.89236	4.51309	6.33218	4.7027	9.53182	4.90341	11.9564	7.36565	10.3635	3.73411	7.66282	5.51495	7.22094	3.18744	7.3102	5.79272	6.43309	4.87291		63.3261	6.12448	57.0066	5.20202	63.3812	4.56869	59.9621	4.88995	49.4089	7.02629	53.5278	8.18969	59.4435	8.20575	54.9046	7.76288	53.1882	8.59814	53.2204	6.95515		1.51094	1.49308	1.41503	1.4867	1.58282	1.82482	1.80951	1.56857
7.60904	6.09156	7.89458	4.46929	6.31001	4.69494	9.67819	4.92559	11.9569	7.3723	10.3363	3.7147	7.6789	5.52493	7.22482	3.19298	7.35844	5.78995	6.43143	4.87735		63.9411	6.13596	56.9698	5.19285	62.1306	4.5664	58.863	4.88536	49.3056	6.99416	53.0574	8.11396	59.4688	8.23329	52.8853	7.756	53.3833	8.46505	53.4338	6.88631		1.50456	1.48733	1.40674	1.485	1.59494	1.82844	1.80058	1.5724
7.51091	6.13259	7.8979	4.4205	6.28838	4.69106	9.81402	4.95497	11.9242	7.38339	10.3624	3.70583	7.66338	5.53103	7.22981	3.19575	7.35678	5.79715	6.43087	4.87846		64.2187	6.14055	56.7427	5.17908	59.8749	4.55952	58.3398	4.88306	49.5466	6.96663	52.4172	8.10249	59.5491	8.26541	51.1024	7.77435	53.397	8.37785	54.0992	6.85189		1.50711	1.47947	1.42503	1.485	1.60621	1.8412	1.79059	1.60366
7.42442	6.12981	7.8979	4.37947	6.2712	4.6955	9.92158	4.96107	11.8588	7.42442	10.3818	3.70528	7.64397	5.52881	7.23757	3.19354	7.32961	5.82155	6.43143	4.92614		64.3702	6.14513	56.6738	5.16301	59.2485	4.51362	58.2159	4.88077	49.955	6.95974	52.447	8.08872	59.6409	8.28607	50.3956	7.78353	53.3466	8.36408	55.2787	6.83124		1.50988	1.48202	1.44161	1.48202	1.60536	1.84311	1.78187	1.60812
7.39226	6.14534	7.91121	4.35729	6.26621	4.74484	9.99255	4.95663	11.7884	7.44659	10.3657	3.70528	7.64286	5.53047	7.25365	3.19132	7.31187	5.84761	6.43032	5.00376		64.4964	6.15431	56.7174	5.16301	59.253	4.46314	58.1493	4.88536	50.3153	6.95056	53.1033	7.93268	59.8405	8.28607	50.6021	7.77894	53.5508	8.38474	56.0474	6.83124		1.5035	1.48648	1.44587	1.475	1.60493	1.84332	1.76889	1.60919
7.39115	6.19191	7.9284	4.35951	6.26066	4.79862	10.0452	4.98491	11.6708	7.39947	10.3596	3.70361	7.64785	5.53269	7.28082	3.19076	7.29745	5.86757	6.43475	5.0592		64.5675	6.15431	56.7128	5.17678	59.2508	4.45396	58.1057	4.88536	50.4874	6.93221	53.5393	7.7973	59.8313	8.28607	50.9486	7.73764	53.7871	8.37785	56.169	6.83583		1.51647	1.48563	1.45714	1.47819	1.60664	1.84332	1.75699	1.59941
7.39614	6.22795	7.94337	4.36893	6.23904	4.82967	10.0935	4.996	11.5383	7.34347	10.3258	3.7075	7.65617	5.54489	7.31519	3.19076	7.2847	5.84539	6.43808	5.08194		64.5629	6.15202	56.3205	5.18367	59.3012	4.46773	58.1401	4.88536	50.57	6.91385	53.8537	7.76058	59.728	8.27918	50.9968	7.62979	53.8216	8.38015	56.1552	6.85189		1.512	1.49754	1.49116	1.47649	1.6094	1.84481	1.74316	1.60281
7.40723	6.22684	7.92951	4.36394	6.24569	4.86404	10.1129	4.98491	11.4807	7.31741	10.282	3.74409	7.66781	5.56596	7.33072	3.20518	7.28248	5.76223	6.43974	5.09857		64.6364	6.16349	56.0199	5.19743	59.5445	4.49756	58.0828	4.88995	50.7605	6.88402	54.4113	7.74682	59.7579	8.28148	51.2745	7.56095	53.7711	8.40768	55.8822	6.86566		1.52115	1.50307	1.51945	1.51881	1.61557	1.84226	1.71148	1.6043
7.41166	6.1908	7.9101	4.36062	6.24846	4.88012	10.1118	4.94721	11.5245	7.31131	10.2481	3.79122	7.67946	5.57039	7.3346	3.22625	7.27139	5.68128	6.46636	5.10855		64.7649	6.18185	56.0841	5.21579	59.8657	4.5228	57.9336	4.89683	51.1047	6.84272	55.0607	7.72846	59.8336	8.29065	52.1602	7.58848	53.7389	8.42145	55.5058	6.86566		1.51817	1.49924	1.53858	1.53412	1.62663	1.84247	1.67979	1.62237
7.40557	6.15809	7.91564	4.36228	6.2285	4.87624	10.1472	4.89232	11.6015	7.31353	10.2066	3.84167	7.68167	5.5654	7.34014	3.25785	7.24312	5.653	6.52734	5.103		64.8543	6.18185	55.9854	5.22268	59.8152	4.53198	57.7868	4.89683	51.2676	6.81518	55.2121	7.72616	59.8313	8.29524	52.2313	7.59537	53.7114	8.43292	55.437	6.88402		1.52476	1.49924	1.54922	1.53454	1.62663	1.82333	1.66554	1.65066
7.36398	6.14534	7.95279	4.36838	6.21575	4.89398	10.231	4.86238	11.6675	7.3224	10.1977	3.85664	7.67003	5.56041	7.35567	3.28945	7.21429	5.63748	6.63934	5.1091		64.9461	6.17497	55.6114	5.22497	59.4274	4.53427	57.555	4.88765	51.2745	6.806	55.0882	7.756	59.689	8.30901	52.2933	7.59766	53.5875	8.46046	56.0543	6.92532		1.5473	1.4952	1.54815	1.53221	1.62684	1.81015	1.65725	1.65066
7.24589	6.13702	7.98329	4.36783	6.19912	4.90729	10.3263	4.85739	11.6958	7.35234	10.1982	3.85331	7.65118	5.55764	7.37119	3.28613	7.20763	5.59645	6.79902	5.11964		65.1297	6.15661	55.2488	5.22497	59.2966	4.53427	57.3301	4.88306	51.1781	6.80371	55.6366	7.76976	59.5261	8.33425	52.4723	7.56324	53.3947	8.49259	57.0479	6.93221		1.57623	1.49733	1.54837	1.54326	1.61918	1.80717	1.6598	1.65363
7.07069	6.13092	8.00214	4.3706	6.19302	4.90563	10.3823	4.8646	11.6836	7.3662	10.1905	3.84222	7.64065	5.5654	7.35788	3.28446	7.21429	5.60754	6.94372	5.15568		65.2467	6.13366	55.1249	5.22038	59.4137	4.55722	57.3645	4.87848	50.8041	6.80371	56.1942	7.74911	59.4963	8.32049	52.4952	7.47146	53.4406	8.50635	57.3278	6.91844		1.60217	1.49627	1.5473	1.54645	1.61727	1.7976	1.67065	1.65278
6.85224	6.12538	8.02154	4.32846	6.20411	4.90673	10.3967	4.87181	11.6708	7.40279	10.1872	3.83113	7.62069	5.58481	7.33737	3.28446	7.21928	5.64801	7.0158	5.2771		65.3202	6.12219	55.1272	5.22268	60.1594	4.61229	57.3347	4.87848	50.0996	6.80141	56.2814	7.73075	59.7854	8.30901	52.6375	7.44851	53.4475	8.51553	57.399	6.90697		1.61365	1.50413	1.5539	1.55049	1.6043	1.77761	1.6632	1.6564
6.63435	6.16474	8.01877	4.3024	6.22296	4.90673	10.4045	4.86959	11.6631	7.42663	10.1949	3.86163	7.54417	5.61974	7.31131	3.30553	7.19322	5.64801	6.95481	5.37357		65.3133	6.11989	55.1089	5.22268	60.4371	4.6513	57.2613	4.89683	49.3033	6.79682	56.3067	7.68945	60.4876	8.31131	53.0138	7.46457	53.4613	8.52701	57.4403	6.88631		1.61812	1.50647	1.5422	1.55624	1.61344	1.76315	1.66256	1.65682
6.52069	6.18249	7.95834	4.3024	6.23848	4.90729	10.4134	4.85739	11.6475	7.26696	10.2121	3.88048	7.44216	5.64302	7.28692	3.30719	7.135	5.65688	6.84337	5.39186		65.2812	6.12219	55.0951	5.22038	60.4532	4.66507	57.3163	4.93125	48.7779	6.79453	56.4375	7.6252	60.6987	8.32966	53.4177	7.50588	53.319	8.5293	57.2773	6.87255		1.62875	1.51051	1.54135	1.55347	1.63534	1.75061	1.66044	1.65725
6.50295	6.18249	7.90955	4.37004	6.24791	4.91173	10.4306	4.85573	11.6342	7.0413	10.2199	3.88381	7.35234	5.62861	7.27638	3.31218	7.06625	5.64413	6.78571	5.3963		65.3202	6.13366	55.1731	5.20891	60.4669	4.70179	57.5825	4.98862	48.5186	6.78994	56.4604	7.57931	60.5335	8.35949	53.8239	7.55636	53.3121	8.52471	57.0593	6.87255		1.63981	1.51519	1.55517	1.53795	1.63513	1.74082	1.66044	1.65725
6.50517	6.1775	7.8979	4.49424	6.26011	4.91173	10.4555	4.85517	11.6176	6.82119	10.2149	3.8899	7.29745	5.59201	7.26585	3.38537	6.96091	5.63249	6.76575	5.39353		65.3523	6.16808	55.079	5.19055	60.483	4.79816	57.7776	5.08041	48.3855	6.78994	56.1552	7.55406	60.5381	8.36638	54.0051	7.60225	54.0625	8.51324	57.0479	6.83813		1.63917	1.51923	1.57559	1.53667	1.62535	1.74082	1.66023	1.65704
6.48576	6.16918	7.91176	4.55301	6.26343	4.90729	10.4749	4.85462	11.6004	6.62825	10.1938	3.89046	7.36121	5.54877	7.25421	3.49016	6.83727	5.62972	6.75965	5.36636		65.3729	6.23463	54.7738	5.17908	60.4578	4.87618	57.7661	5.19973	48.413	6.78994	55.8363	7.53112	60.5931	8.36408	53.8124	7.64585	54.7578	8.51783	57.0433	6.81288		1.63917	1.5237	1.5775	1.5354	1.61578	1.74082	1.65704	1.65704
6.47966	6.1714	7.94891	4.54691	6.26343	4.90563	10.4854	4.87236	11.6065	6.50572	10.1755	3.89434	7.43661	5.51273	7.24755	3.55724	6.72971	5.59811	6.76741	5.33309		65.6139	6.32412	54.6821	5.18596	60.4096	4.9129	57.711	5.30299	48.0596	6.78535	55.7881	7.49899	60.7125	8.39162	53.6403	7.64356	54.8152	8.5293	57.041	6.81059		1.65002	1.52072	1.58154	1.54539	1.61918	1.74189	1.65725	1.6564
6.51625	6.17251	7.98495	4.59958	6.27009	4.90951	10.4782	4.89287	11.6082	6.40925	10.1716	3.89046	7.43994	5.49887	7.24811	3.61047	6.63878	5.54655	6.79514	5.31369		65.747	6.40673	54.6408	5.19973	60.3912	4.94273	57.6055	5.33282	47.6282	6.79453	55.8133	7.48752	60.4876	8.41916	53.6288	7.62749	54.7371	8.50865	56.9033	6.78535		1.65002	1.52136	1.58154	1.5456	1.64364	1.73636	1.63598	1.65385
6.58279	6.17029	8.00214	4.75815	6.27175	4.89897	10.4344	4.87291	11.5865	6.37266	10.1739	3.89711	7.43273	5.4961	7.24866	3.67201	6.56227	5.53269	6.8406	5.29373		65.5106	6.46639	54.2667	5.19285	60.4004	4.94732	57.5298	5.33282	47.5479	6.82895	55.7973	7.48752	60.4371	8.41457	53.6127	7.66421	54.7624	8.50865	56.3296	6.76699		1.63939	1.52561	1.58154	1.54901	1.66299	1.72913	1.62769	1.65576
6.66041	6.15975	8.00325	4.92392	6.26898	4.88844	10.4039	4.84741	11.5705	6.38485	10.1727	3.94258	7.42386	5.50386	7.29357	3.70029	6.51237	5.57316	6.90214	5.28209		65.8273	6.50769	53.8261	5.16301	60.4027	4.94961	57.5114	5.33511	47.5433	6.86107	55.6871	7.46457	61.2242	8.42375	53.6449	7.70322	54.6385	8.51553	56.1461	6.76699		1.64555	1.54092	1.58048	1.54964	1.66278	1.7287	1.62769	1.65257
6.71641	6.14977	7.99992	5.02261	6.26676	4.87402	10.3917	4.82191	11.5649	6.27064	10.1483	4.03018	7.42553	5.51606	7.33848	3.7014	6.47079	5.59257	6.95204	5.29761		66.4836	6.53523	53.5921	5.14695	60.4073	4.94732	56.7725	5.33741	47.5479	6.86796	55.4118	7.4508	61.7841	8.47882	54.4572	7.73764	54.5995	8.54995	56.4581	6.78076		1.64215	1.54156	1.5909	1.54964	1.6615	1.73636	1.63471	1.64172
6.76797	6.13259	7.98329	5.06253	6.26842	4.86959	10.3612	4.79751	11.505	6.07104	10.1073	4.11112	7.46267	5.52493	7.3479	3.70084	6.45139	5.58702	6.94095	5.3342		66.8209	6.56047	53.5577	5.11024	60.2788	4.94273	55.3085	5.33741	47.5479	6.86796	55.1043	7.45998	61.8713	8.51783	55.8409	7.76747	54.6109	8.71058	56.6394	6.73716		1.64343	1.54156	1.59132	1.54858	1.66065	1.73572	1.64151	1.64066
6.81676	6.08934	7.98329	5.07861	6.26787	4.87735	10.3463	4.78032	11.3792	5.93022	10.0707	4.13607	7.50315	5.54378	7.35068	3.70694	6.46303	5.59534	6.83893	5.36636		66.9196	6.60636	53.6609	5.05287	60.1227	4.93814	53.7757	5.342	47.5823	6.86337	54.9987	7.45998	61.8346	8.4857	56.6302	7.78124	54.7945	8.81384	56.8345	6.67291		1.65214	1.53029	1.58835	1.55283	1.66044	1.74125	1.64428	1.64109
6.83727	6.07382	7.98273	5.10023	6.25456	4.89565	10.3535	4.77312	11.2655	5.88531	10.0541	4.12055	7.63177	5.5776	7.35179	3.71415	6.4719	5.62195	6.69201	5.35694		66.9333	6.65455	53.6931	5.02763	60.0929	4.93814	52.135	5.34888	47.4332	6.84501	55.0538	7.44851	62.0571	8.4421	57.2429	7.78353	55.0813	8.85514	57.2452	6.59948		1.65214	1.5069	1.5809	1.55198	1.66852	1.73763	1.65512	1.63534
6.79181	6.07104	7.98772	5.11742	6.28173	4.91283	10.3479	4.79141	11.1907	5.89529	10.0502	4.09338	7.87184	5.59756	7.36343	3.71692	6.48243	5.63138	6.57558	5.34197		66.9173	6.6752	53.6839	5.01386	59.93	4.93355	51.364	5.35577	47.2703	6.81288	55.281	7.4531	62.3532	8.46046	57.7202	7.77665	55.4347	8.89186	57.4196	6.53523		1.64853	1.50817	1.58112	1.5473	1.67213	1.73763	1.65938	1.63534
6.6216	6.05109	8.00158	5.12186	6.31555	4.92503	10.3363	4.78864	11.2106	5.93022	10.0541	4.05568	7.98828	5.59257	7.36454	3.71637	6.48077	5.64191	6.53344	5.34197		66.9012	6.69815	53.7275	4.9978	59.0741	4.92437	51.3961	5.342	47.2473	6.77846	55.5724	7.4508	62.4426	8.46505	57.7661	7.76517	55.6045	8.89874	57.3852	6.48704		1.64853	1.49882	1.57367	1.55262	1.66809	1.74082	1.65066	1.63471
6.39539	6.04554	8.00491	5.12241	6.33274	4.9278	10.3174	4.7842	11.2578	5.97014	10.0535	4.01576	8.02376	5.5837	7.3967	3.7086	6.45804	5.65633	6.53455	5.35804		66.892	6.75093	53.8376	4.9955	58.8033	4.91519	51.3938	5.3397	47.2175	6.74863	56.0015	7.43015	62.4312	8.4444	59.5927	7.76288	55.5747	8.8758	57.3462	6.46409		1.63981	1.45926	1.56942	1.56155	1.66894	1.74061	1.65278	1.63556
6.30557	6.00895	8.00047	5.12186	6.35602	4.92947	10.3213	4.76813	11.2583	5.98677	10.0441	3.98471	8.07144	5.58481	7.49816	3.70971	6.44085	5.65744	6.534	5.3708		66.8943	6.8083	54.0051	4.9955	58.5784	4.91519	51.1001	5.36953	47.6191	6.73945	56.3686	7.41179	62.344	8.43522	62.2155	7.77435	55.554	8.8322	57.4448	6.45721		1.62301	1.43481	1.57304	1.56772	1.66937	1.74146	1.66129	1.63768
6.35325	5.91137	8.00103	5.12186	6.3782	4.93723	10.3391	4.75094	11.2284	5.9657	10.0408	3.9897	8.11302	5.59368	7.57522	3.71969	6.43974	5.65467	6.53344	5.3719		66.8714	6.85419	54.0235	4.9955	58.4499	4.94273	49.0945	5.36953	48.1858	6.73257	56.3595	7.41409	62.2545	8.38703	63.7208	7.84319	55.5494	8.80466	57.7707	6.45721		1.60068	1.43226	1.57282	1.57899	1.66661	1.73104	1.66235	1.6396
6.46525	5.84151	8.00103	5.12518	6.37487	4.93501	10.3369	4.7526	11.2084	5.94353	10.0358	3.99691	8.09861	5.60144	7.57966	3.71969	6.44695	5.65522	6.53289	5.37967		66.8897	6.90008	54.074	4.98862	58.4155	4.98862	46.3822	5.37642	48.3763	6.7188	56.6302	7.43474	62.2912	8.30901	64.1499	7.97858	55.5357	8.80925	57.8487	6.45492		1.59047	1.42481	1.57282	1.57006	1.66639	1.72977	1.66384	1.65002
6.60164	5.77664	8.00214	5.12851	6.34272	4.93834	10.287	4.77533	11.1325	5.95129	10.0541	3.99137	8.10304	5.59867	7.57245	3.72302	6.44917	5.67407	6.52734	5.38355		66.8989	6.95286	54.3493	4.99091	58.5096	5.00927	45.6709	5.44985	48.4199	6.70274	57.002	7.44392	62.3509	8.26771	63.9135	8.09331	55.5449	8.81154	57.8304	6.44803		1.59111	1.40589	1.54986	1.56581	1.66618	1.73295	1.66256	1.65725
6.80012	5.72397	8.02819	5.12684	6.31056	4.94998	10.2714	4.76369	10.9706	5.96348	10.1095	3.98915	8.17235	5.58869	7.56358	3.71914	6.44917	5.70734	6.51903	5.36913		66.8851	7.03088	54.9505	4.9978	58.7023	4.98862	45.6135	5.51869	48.4543	6.69127	57.3967	7.44851	62.2522	8.27918	63.551	8.11167	55.4944	8.82761	57.7753	6.45033		1.60153	1.43077	1.53199	1.56602	1.66554	1.727	1.66235	1.6564
7.02023	5.7284	8.05259	5.13294	6.2906	4.95109	10.2908	4.74262	10.8774	5.96238	10.1212	4.00634	8.23333	5.58813	7.55582	3.69918	6.45527	5.75114	6.4974	5.38078		66.8346	7.12267	55.4714	5.01157	58.8239	4.97944	45.6296	5.53934	48.4681	6.66832	58.0552	7.48063	62.2407	8.32737	63.7277	8.1002	55.1938	8.87121	57.7202	6.48475		1.60089	1.47117	1.51647	1.57027	1.66469	1.71679	1.66384	1.65619
7.18435	5.7345	8.0415	5.14514	6.26676	4.94776	10.1822	4.74262	10.848	5.96182	10.0874	4.02241	8.25108	5.59146	7.51812	3.70971	6.46137	5.7151	6.43364	5.37967		66.7819	7.18692	55.6114	5.02992	58.4637	4.97944	45.6365	5.55081	48.475	6.64996	58.5279	7.50129	62.1879	8.40768	64.4803	8.09102	54.9161	8.99282	57.7019	6.50999		1.60919	1.50137	1.49308	1.57856	1.66873	1.73763	1.68107	1.65619
7.27306	5.74504	8.04815	5.19171	6.24902	4.94499	10.0641	4.74151	10.863	5.96238	10.058	4.03627	8.23833	5.58259	7.46434	3.71637	6.46192	5.57205	6.35048	5.36858		66.7061	7.24658	55.655	5.03451	57.0754	4.98174	45.6342	5.56688	48.452	6.63619	58.6312	7.48522	61.6854	8.46964	64.4895	8.08413	54.8587	9.15116	57.7064	6.51917		1.62344	1.54135	1.48053	1.57856	1.66937	1.73423	1.68107	1.65725
7.32961	5.77221	8.10637	5.2394	6.24347	4.94111	10.0497	4.74983	10.8885	5.96626	10.0563	4.06843	8.23722	5.54433	7.41776	3.71581	6.45915	5.5277	6.28561	5.35472		66.6006	7.35672	55.6573	5.03451	55.912	4.98632	45.6204	5.56917	48.3006	6.61325	58.6909	7.51276	61.1117	8.50865	64.5193	8.09102	54.8587	9.27048	57.711	6.54441		1.62854	1.57878	1.47734	1.56006	1.6732	1.70531	1.70722	1.65342
7.39503	5.78385	8.16847	5.24827	6.25401	4.94166	10.0813	4.78088	10.9185	5.96459	10.0596	4.10447	8.16126	5.47115	7.39836	3.72025	6.44141	5.52881	6.22185	5.31979		66.2954	7.46687	55.5288	5.03222	55.141	4.98174	45.6204	5.5554	47.7521	6.58342	58.9616	7.58848	60.7813	8.5293	64.5423	8.10938	54.8358	9.32096	57.711	6.55129		1.62577	1.58622	1.47415	1.56644	1.67596	1.68149	1.72849	1.64917
7.466	5.77775	8.20728	5.25326	6.30335	4.94056	10.1472	4.8208	11.0476	5.97901	10.0513	4.13053	8.10692	5.33254	7.3978	3.73466	6.44695	5.51606	6.14257	5.27266		65.747	7.538	55.3383	5.02533	54.448	4.95879	45.6296	5.53246	47.0133	6.57194	59.0855	7.68486	60.8088	8.51324	64.4505	8.15068	54.8404	9.25671	57.6996	6.47327		1.62918	1.59685	1.46182	1.58494	1.66469	1.65512	1.74061	1.67851
7.49705	5.78607	8.2034	5.25658	6.36545	4.9145	10.2116	4.85684	11.143	6.04499	10.0181	4.15049	8.10803	5.17009	7.37452	3.77514	6.50406	5.51439	6.03778	5.26545		65.3684	7.60225	55.1135	5.00698	54.4113	4.93125	45.6319	5.5141	46.8871	6.57883	59.0626	7.76288	60.9259	8.47423	64.5721	8.21722	54.8312	9.23606	57.5665	6.39755		1.63003	1.62067	1.45012	1.58261	1.643	1.64725	1.73933	1.68893
7.49705	5.80214	8.2045	5.271	6.33773	4.8463	10.2287	4.85295	11.1774	6.14035	10.0181	4.17876	8.10803	5.0714	7.34735	3.83834	6.58112	5.51606	5.95794	5.29428		65.3179	7.68715	54.7968	4.98174	53.9271	4.92207	45.6388	5.51869	46.9192	6.58112	59.0695	7.82025	60.9328	8.46275	64.7052	8.28836	54.7899	9.33014	57.5963	6.43656		1.62875	1.62577	1.45118	1.55602	1.63173	1.64981	1.7387	1.66342
7.47709	5.81933	8.20894	5.33032	6.16364	4.87901	10.1949	4.78698	11.184	6.23737	10.0824	4.19429	8.13797	5.07029	7.32961	3.8899	6.64544	5.51827	5.92412	5.3342		65.2995	7.75829	54.5054	4.94273	53.2685	4.92207	45.641	5.5141	46.8985	6.58571	58.9869	7.88909	60.9259	8.46964	64.7304	8.34114	54.728	9.38751	57.9428	6.47327		1.62811	1.62577	1.45352	1.55347	1.63194	1.64576	1.74316	1.62939
7.47265	5.80935	8.22058	5.36858	5.93632	4.93778	10.1844	4.74151	11.184	6.28949	10.1156	4.19484	8.19175	5.0836	7.33404	3.91208	6.66263	5.51717	5.92024	5.35084		65.3362	7.80877	54.4595	4.90372	53.101	4.91978	45.6456	5.47968	46.7631	6.60407	58.9341	7.92351	60.919	8.44899	64.6777	8.36867	54.6568	9.41734	58.0185	6.52835		1.62599	1.62556	1.44438	1.55283	1.63173	1.64151	1.74784	1.62344
7.55194	5.77664	8.27436	5.37246	5.78884	4.94998	10.2188	4.74539	11.1779	6.29448	10.0879	4.19651	8.31428	5.06087	7.39503	3.89323	6.66595	5.48778	5.94574	5.35084		65.311	7.8409	54.4962	4.87618	53.0345	4.91978	45.5561	5.43379	46.3409	6.61095	58.9157	7.86843	61.0154	8.36408	64.5285	8.35491	54.5444	9.44258	57.8418	6.57424		1.62237	1.62556	1.44119	1.5539	1.63662	1.64258	1.74338	1.63449
7.69942	5.75613	8.32315	5.37634	5.72452	4.9461	10.2154	4.76314	11.1663	6.28173	9.98756	4.19817	8.48449	5.04922	7.49538	3.86662	6.6715	5.43733	6.01948	5.33975		64.8291	7.84549	54.6775	4.83258	52.9427	4.91978	45.1156	5.41543	46.0449	6.60407	58.8469	7.76288	61.1645	8.24017	64.3679	8.29065	54.4893	9.45176	57.6307	6.60177		1.61854	1.643	1.44927	1.5539	1.63364	1.64385	1.74912	1.64279
7.79644	5.76278	8.36085	5.38854	5.7151	4.94887	10.1811	4.76369	11.1835	6.26898	9.87224	4.19706	8.57708	5.05477	7.58409	3.84001	6.66817	5.45562	6.12704	5.32977		64.2623	7.85467	54.7486	4.75915	52.9129	4.91978	44.5258	5.42002	45.9738	6.58801	58.7345	7.65273	61.0704	8.17133	64.3197	8.2287	54.5444	9.46323	57.5022	6.64767		1.60898	1.65555	1.45607	1.55113	1.63896	1.6481	1.76932	1.65214
7.81252	5.765	8.35365	5.39186	5.73062	4.9461	10.1811	4.7648	11.2522	6.26011	9.86115	4.20981	8.61589	5.05366	7.67557	3.79953	6.66928	5.51883	6.23904	5.31313		64.3564	7.93957	54.6293	4.70408	52.8991	4.91978	44.1679	5.44296	45.9623	6.57653	58.6289	7.55865	60.483	8.16904	64.322	8.21952	54.5972	9.58714	57.6697	6.7211		1.60898	1.65427	1.46522	1.54986	1.6481	1.65193	1.79739	1.65363
7.81141	5.765	8.35143	5.40351	5.75003	4.94499	10.2542	4.72932	11.3759	6.25733	9.90273	4.22146	8.65082	5.05699	7.75098	3.78234	6.67205	5.54489	6.31777	5.2965		64.5515	8.03594	54.2392	4.63524	52.8784	4.93125	44.0669	5.45673	46.0839	6.57883	58.583	7.50358	59.7625	8.1828	64.3426	8.22181	54.6063	9.76383	57.7179	6.78764		1.60983	1.64895	1.47011	1.54837	1.65108	1.64768	1.81717	1.65448
7.79644	5.79771	8.36806	5.42901	5.77387	4.95774	10.4156	4.63617	11.5544	6.25955	9.96649	4.20815	8.65304	5.05532	7.78591	3.78955	6.70199	5.54212	6.34549	5.28597		64.5446	8.04283	54.0809	4.53427	52.9496	4.94732	43.9958	5.45673	46.2377	6.57194	58.6014	7.51047	59.5101	8.18051	64.3082	8.21952	54.5995	9.8648	57.711	6.83583		1.60983	1.64598	1.47075	1.54518	1.65087	1.63322	1.82482	1.64874
7.79921	5.85482	8.36695	5.45008	5.79383	4.94887	10.5747	4.55301	11.8405	6.25789	9.95208	4.19651	8.62532	5.04701	7.7909	3.77181	6.72971	5.54988	6.31777	5.28541		64.6226	7.99694	54.0831	4.45625	52.9312	4.95879	43.9155	5.45673	46.2836	6.55588	58.6174	7.53341	59.7739	8.18051	64.6042	8.21493	54.5903	9.94741	57.7271	6.83354		1.60323	1.61238	1.47202	1.54603	1.64853	1.62535	1.83482	1.64853
7.8042	5.90083	8.37416	5.45174	5.81767	4.91727	10.6518	4.50089	12.1487	6.25013	9.84064	4.19152	8.57708	5.03592	7.80531	3.80729	6.76021	5.57871	6.37155	5.2843		64.6111	7.93957	54.0946	4.3943	52.9427	4.96108	43.9109	5.45673	46.3616	6.56277	58.6197	7.54489	60.5495	8.19198	65.0884	8.20805	54.5719	10.1195	57.9474	6.81747		1.60323	1.60345	1.46415	1.54603	1.63726	1.62088	1.83737	1.65512
7.79422	5.9463	8.39024	5.38687	5.83042	4.8463	10.7094	4.49535	12.2835	6.22961	9.85062	4.19041	8.50501	5.02427	7.84191	3.83169	6.79735	5.61475	6.52568	5.28597		64.5583	7.87761	54.0923	4.33693	53.0987	4.98862	43.6791	5.45673	46.4557	6.56965	58.6197	7.55177	61.7864	8.11167	65.1504	8.20116	54.5283	10.287	58.2227	6.79912		1.61876	1.61046	1.45926	1.54177	1.61897	1.6296	1.84056	1.6547
7.79311	5.96459	8.41463	5.28763	5.77775	4.76369	10.7771	4.4898	12.2929	6.20245	9.96428	4.19373	8.45899	5.01873	7.91232	3.83224	6.82729	5.65023	6.59332	5.28819		64.5354	7.80877	54.2185	4.30022	53.3879	5.09188	43.3785	5.46132	46.3478	6.56735	58.5876	7.55406	62.7042	7.86843	65.2123	8.19887	54.3906	10.3513	58.2778	6.79223		1.61791	1.60621	1.46118	1.5422	1.61259	1.63386	1.86438	1.6547
7.78979	5.95572	8.43903	5.18118	5.70734	4.74041	10.8525	4.43824	12.3012	6.19967	10.0208	4.20759	8.46731	5.01984	8.04926	3.86662	6.85557	5.68959	6.60441	5.30038		64.4826	7.78353	54.3057	4.24744	53.4383	5.18826	43.3326	5.46362	46.7127	6.58571	58.4545	7.54489	63.6382	7.70551	65.2926	8.23099	53.9684	10.365	58.3168	6.78994		1.61365	1.60579	1.45948	1.53306	1.60834	1.63364	1.93945	1.64513
7.80088	5.89252	8.44845	5.07584	5.66631	4.74041	10.939	4.34454	12.375	6.19302	10.0236	4.21037	8.4734	5.01762	8.2034	3.95145	6.86167	5.71676	6.60441	5.33919		64.5354	7.78812	54.3195	4.17631	53.3626	5.24103	43.624	5.4705	47.0064	6.59489	58.4591	7.52194	64.5859	7.59537	65.4624	8.27	53.1263	10.3444	58.4338	6.78764		1.56772	1.61599	1.45671	1.52965	1.58984	1.63386	1.97368	1.63556
7.84689	5.76943	8.44568	5.03037	5.64857	4.73985	11.0055	4.26359	12.4326	6.17528	10.0197	4.20815	8.48283	5.01873	8.28379	4.05346	6.86333	5.72286	6.60053	5.36359		64.221	7.79042	54.4916	4.15336	53.2617	5.27086	43.9407	5.52787	47.1005	6.59948	58.4407	7.48522	64.7626	7.55177	65.545	8.29065	51.9032	10.3352	58.4361	6.78076		1.53625	1.61046	1.44991	1.51753	1.56751	1.63343	1.99134	1.64066
7.89569	5.70346	8.48006	5.05311	5.64025	4.72987	11.0388	4.24751	12.4066	6.16641	10.0053	4.18985	8.48893	5.02039	8.30763	4.0895	6.8661	5.71898	6.6155	5.36248		63.0003	7.77665	54.4893	4.15336	53.1928	5.29381	44.1289	5.6426	47.1647	6.61554	58.8079	7.43704	64.5537	7.55177	65.5909	8.29754	50.593	10.3765	58.4361	6.77158		1.51243	1.60281	1.44672	1.4884	1.56985	1.63194	2.00431	1.64789
7.94226	5.65189	8.52053	5.07029	5.64247	4.70381	11.0803	4.25195	12.3777	6.16585	9.96317	4.15991	8.47507	5.02594	8.31872	4.09061	6.87442	5.71898	6.62104	5.34917		61.3779	7.74682	54.1772	4.14647	52.9611	5.33741	44.1266	5.73898	47.1303	6.65914	59.595	7.41179	64.4987	7.54489	65.6093	8.2723	49.9826	10.3811	58.3558	6.77388		1.48882	1.60281	1.44438	1.47585	1.56985	1.63024	2.00197	1.6447
7.97386	5.56707	8.5355	5.03204	5.64912	4.67443	11.1258	4.25971	12.3666	6.16474	9.93046	4.1516	8.47839	5.03148	8.32648	4.0956	6.9537	5.71898	6.62049	5.24605		59.471	7.74223	53.996	4.13271	52.2359	5.37642	44.3216	5.80093	46.7815	6.67061	59.8382	7.41638	64.7672	7.42786	65.545	8.17592	50.3497	10.3696	58.2411	6.77617		1.48904	1.60004	1.45076	1.47457	1.5573	1.62982	2.00495	1.6447
7.95002	5.49942	8.54548	4.8779	5.65134	4.64172	11.1136	4.2453	12.3783	6.15975	9.95984	4.16158	8.47839	5.02261	8.33646	4.10946	7.10118	5.72175	6.62492	5.16344		57.6009	7.74911	53.8812	4.13271	50.7238	5.3856	44.5396	5.81929	46.3822	6.62243	59.5628	7.41409	66.082	7.29247	65.5841	8.04512	50.3933	10.3903	58.1493	6.77388		1.48138	1.61131	1.46139	1.4699	1.54794	1.63045	2.01175	1.63343
7.90566	5.47946	8.54881	4.80416	5.65078	4.61954	11.1158	4.26581	12.3816	6.15476	10.0136	4.17932	8.49059	5.02261	8.3481	4.11223	7.16882	5.72064	6.6288	5.12019		57.2911	7.74452	53.7183	4.135	48.8697	5.38101	44.6016	5.82618	46.2767	6.52835	59.5628	7.39803	68.2321	7.24428	65.6001	7.9258	50.0675	10.3834	57.9703	6.77388		1.48542	1.61131	1.47075	1.45884	1.54263	1.63449	2.01515	1.62918
7.89735	5.47891	8.54659	4.81359	5.63083	4.59071	11.1574	4.32624	12.3838	6.15476	10.0369	4.18874	8.53217	5.00321	8.35198	4.11168	7.18546	5.72064	6.6277	5.12296		57.6353	7.73534	53.716	4.1373	47.5112	5.36265	44.597	5.85371	46.2377	6.41132	59.2485	7.35672	69.4162	7.21445	65.6001	7.7973	50.0124	10.3949	57.7477	6.77388		1.49414	1.60898	1.47309	1.46203	1.53965	1.63364	2.01494	1.62705
7.93172	5.48445	8.57542	4.84298	5.58037	4.57463	11.1973	4.37947	12.3844	6.16585	10.0242	4.19262	8.59815	4.99766	8.35087	4.10558	7.19544	5.70734	6.6288	5.18562		57.7799	7.72616	53.42	4.13041	46.8871	5.342	44.5901	5.89731	46.0564	6.29888	58.4706	7.29247	69.5309	7.17315	65.6162	7.6229	49.8334	10.4224	57.8166	6.77388		1.4935	1.62003	1.47436	1.46671	1.54348	1.62833	2.00899	1.62918
7.96222	5.48445	8.64195	4.87458	5.58148	4.58627	11.2079	4.43547	12.3633	6.17195	9.97703	4.19262	8.64029	4.99822	8.35697	4.09449	7.19377	5.68904	6.63102	5.22553		58.326	7.71699	52.8853	4.1373	46.832	5.33053	44.574	5.92255	45.7994	6.20709	57.8831	7.23969	69.4207	7.13414	65.6254	7.39573	49.246	10.4132	58.0093	6.79912		1.4935	1.63109	1.47734	1.46203	1.54305	1.61514	2.01005	1.63279
7.96721	5.48224	8.69185	4.87624	5.61419	4.59015	11.2112	4.52972	12.4027	6.17583	9.90218	4.19262	8.61146	4.99711	8.36196	4.09227	7.2032	5.67851	6.65431	5.24272		58.5692	7.71699	52.789	4.135	46.6805	5.34659	44.519	5.93632	45.7925	6.16808	57.6904	7.21904	69.3726	7.11119	65.6254	7.22363	49.5649	10.4086	57.8258	6.86107		1.49308	1.6279	1.48053	1.46203	1.53114	1.59409	2.02664	1.60749
7.97164	5.43955	8.71015	4.89287	5.63083	4.58572	11.209	4.6456	12.4431	6.18082	9.83731	4.20538	8.51887	4.96994	8.36363	4.10059	7.20819	5.70068	6.68037	5.2333		58.3558	7.75829	52.7958	4.135	44.6842	5.38101	44.418	5.9455	45.7168	6.1589	57.8074	7.34984	69.3427	7.08136	65.6208	7.09972	50.2212	10.4132	57.4793	6.96433		1.485	1.62067	1.4884	1.48202	1.52349	1.59324	2.03684	1.58899
7.98606	5.37301	8.74286	4.92392	5.63803	4.58572	11.1807	4.70936	12.452	6.16364	9.81569	4.21314	8.45344	4.89454	8.36474	4.10059	7.21928	5.70623	6.6715	5.17453		58.1057	7.8409	52.8853	4.135	41.2651	5.4269	44.1472	5.9432	45.6296	6.14513	57.181	7.50358	69.2991	7.02629	65.6024	6.95974	50.375	10.4155	57.3783	7.09742		1.48436	1.62046	1.49159	1.50116	1.53625	1.59005	2.0243	1.58154
8.01267	5.33698	8.80163	4.93778	5.63692	4.59126	11.1541	4.73375	12.452	6.13869	9.90939	4.23365	8.40465	4.82967	8.36418	4.12886	7.31131	5.70623	6.66429	5.16011		58.1355	7.93957	53.1722	4.13271	39.0416	5.49804	43.647	5.93861	45.7053	6.12678	56.1621	7.55865	69.2991	6.99187	65.6024	6.84042	50.3864	10.427	57.4012	7.16397		1.48436	1.62514	1.49456	1.51689	1.52455	1.59005	2.02408	1.56729
8.04705	5.30704	8.85042	4.93612	5.5959	4.59736	11.1746	4.72488	12.4082	6.11595	10.1051	4.34232	8.33591	4.79363	8.35254	4.17488	7.43828	5.70401	6.69312	5.18007		58.4752	8.0566	53.4223	4.135	38.2155	5.55999	43.4542	5.93861	46.061	6.11301	55.8868	7.56554	69.1477	6.98269	65.4992	6.77158	50.391	10.4752	57.4081	7.15709		1.48733	1.62556	1.49903	1.53625	1.50924	1.59622	2.016	1.56219
8.05592	5.2771	8.87204	4.89509	5.5338	4.59625	11.1619	4.72266	12.3228	6.10986	10.1921	4.42715	8.31927	4.79141	8.32925	4.20649	7.52089	5.709	6.77573	5.19116		58.9111	8.19428	53.6495	4.135	37.8988	5.55999	43.5804	5.93861	46.8343	6.10613	56.0451	7.56324	68.9182	6.9804	65.2536	6.68897	50.4071	10.5211	57.6491	7.13414		1.48755	1.62514	1.50073	1.53625	1.5052	1.61046	2.016	1.56006
8.07255	5.26268	8.88313	4.84464	5.45673	4.59237	11.1175	4.74373	12.2463	6.10542	10.1683	4.43436	8.31705	4.77478	8.31927	4.20704	7.61625	5.69847	6.88662	5.19781		59.2049	8.34343	53.9753	4.13959	37.7543	5.55081	43.5804	5.93861	47.3368	6.06941	56.2057	7.57931	68.893	6.9804	64.9209	6.65455	50.4622	10.5761	57.9382	7.13184		1.49052	1.62705	1.48882	1.52412	1.49371	1.63237	2.016	1.56304
8.15627	5.27377	8.89533	4.84796	5.42458	4.54635	11.0876	4.79197	12.1953	6.10431	10.1705	4.45044	8.2982	4.75371	8.31983	4.20482	7.7471	5.68959	6.97976	5.23385		59.2691	8.41916	54.0396	4.16713	37.9034	5.55311	43.8237	5.94091	47.4171	6.02122	56.2493	7.57931	68.9457	6.95286	64.6868	6.71421	50.4736	10.6611	58.2204	7.12725		1.50307	1.62322	1.48563	1.52434	1.45458	1.65023	2.016	1.56687
8.20728	5.27987	8.86761	4.86127	5.39408	4.48647	11.0637	4.85295	12.2153	6.09544	10.1844	4.49036	8.29488	4.75427	8.31872	4.20427	7.81529	5.67407	7.04186	5.26601		59.2737	8.41916	54.0487	4.18778	38.2247	5.55311	44.1197	5.9455	47.3758	6.00057	56.5407	7.57931	69.0031	6.93221	64.6685	6.80371	50.4736	10.7482	59.9805	7.12725		1.50988	1.62152	1.4935	1.52434	1.44289	1.65427	2.01643	1.56772
8.21171	5.27654	8.70738	4.86183	5.35694	4.45764	10.9806	4.91505	12.2685	6.04332	10.1944	4.50422	8.32315	4.75427	8.32038	4.20371	7.82971	5.66575	7.06237	5.31868		59.2072	8.40768	54.9069	4.18778	38.2751	5.52098	45.0972	5.91567	47.3162	5.99828	56.9767	7.57931	69.0284	6.92532	64.6432	6.87943	50.4645	10.8217	60.7607	7.12955		1.51222	1.6211	1.49201	1.52412	1.44459	1.65108	2.01834	1.57623
8.21836	5.26933	8.45234	4.86016	5.32533	4.45543	10.8857	4.98214	12.3173	6.0095	10.211	4.50699	8.35198	4.73043	8.31816	4.22478	7.83414	5.67518	7.06293	5.36747		59.1016	8.40539	55.2328	4.20614	38.165	5.46821	46.1895	5.87207	47.4148	5.99598	57.1006	7.57242	69.0605	6.92762	64.6157	6.8932	50.3314	10.8997	60.8754	7.13184		1.51838	1.62259	1.48967	1.5271	1.43162	1.65023	2.00686	1.58367
8.23777	5.26046	8.23223	4.86349	5.29373	4.45543	10.8292	5.01041	12.3716	6.00618	10.2149	4.51031	8.25718	4.70215	8.32204	4.24086	7.83026	5.67352	7.06514	5.34973		59.12	8.39162	55.2052	4.24056	38.0067	5.44296	46.2354	5.84683	48.2845	5.9891	57.2613	7.55865	69.1224	6.95974	64.3312	6.8473	50.2671	10.9708	60.9305	7.12496		1.5237	1.61897	1.49456	1.52497	1.4112	1.64662	2.00367	1.58409
8.23611	5.26324	8.08918	4.86515	5.25104	4.45543	10.7876	4.99323	12.4426	6.00451	10.1949	4.46485	8.12966	4.69272	8.3542	4.24419	7.83082	5.66243	7.07956	5.35804		59.2737	8.35261	55.3315	4.23826	37.908	5.43838	46.2767	5.85142	49.0509	5.99139	57.3163	7.5403	69.2578	6.97581	64.5698	6.81518	50.2946	11.019	60.9465	7.08595		1.52306	1.62705	1.4969	1.52902	1.41439	1.64513	2.00707	1.59919
8.27991	5.25547	8.0221	4.86293	5.18118	4.43658	10.7377	4.99988	12.5197	5.97568	10.2038	4.3584	8.03596	4.68053	8.37971	4.24918	7.83581	5.65855	7.09176	5.35416		59.3815	8.31819	55.359	4.2222	37.9126	5.4292	46.2629	5.90419	49.0716	5.99828	57.6812	7.54489	69.3175	6.95286	65.4739	6.81288	50.095	11.0397	60.88	6.99646		1.51987	1.63301	1.4969	1.53221	1.41205	1.64236	2.01133	1.60196
8.32592	5.26324	8.00325	4.86792	5.12629	4.40719	10.6995	5.08526	12.5701	5.92135	10.2071	4.27468	7.9916	4.67221	8.41685	4.24419	7.84523	5.66132	7.0912	5.3281		59.4183	8.32737	55.1502	4.24056	37.7428	5.43149	46.2193	5.93861	48.6585	5.98451	59.0373	7.59078	69.2991	6.94139	65.825	6.81747	49.2345	11.0534	60.7675	6.89549		1.51774	1.63322	1.49903	1.51115	1.40971	1.6447	2.00877	1.5977
8.34644	5.29207	8.01489	4.88234	5.10356	4.40996	10.705	5.19227	12.5984	5.89917	10.1179	4.25971	8.03374	4.69161	8.4479	4.24918	7.8663	5.66409	7.08788	5.32201		59.4642	8.35032	54.4595	4.25662	37.511	5.43608	46.0793	5.93632	48.3671	5.94779	59.9415	7.62061	69.5102	7.00105	65.8365	6.81747	49.0555	11.1177	60.7652	6.85189		1.51881	1.63279	1.50562	1.48117	1.40993	1.65066	2.02153	1.5977
8.34589	5.29207	8.01988	4.90563	5.09691	4.36949	10.705	5.25769	12.6172	5.89474	10.0325	4.23753	8.0975	4.72155	8.40909	4.25139	7.8724	5.66409	7.08954	5.32311		59.5032	8.32507	53.8307	4.26121	37.3137	5.43608	45.9049	5.9432	48.3648	5.91567	60.6482	7.6229	69.7741	7.06071	65.8824	6.84042	49.3217	11.276	60.7125	6.84501		1.51966	1.63237	1.5186	1.47266	1.41056	1.65342	2.02855	1.6043
8.32925	5.25935	7.9977	4.90396	5.10356	4.31848	10.7083	5.28708	12.6383	5.8903	10.0153	4.18597	8.13354	4.74096	8.34755	4.28577	7.86907	5.66243	7.1156	5.32311		59.5055	8.29524	53.7435	4.27498	36.7836	5.43608	45.9898	5.99369	48.156	5.89502	61.0429	7.63208	69.9416	7.04465	65.8778	6.83354	50.274	11.3816	60.5036	6.8496		1.52753	1.6228	1.5556	1.46947	1.4095	1.64747	2.0311	1.59558
8.34089	5.2394	7.99493	4.90618	5.11797	4.25583	10.7194	5.29761	12.6644	5.87367	10.0441	4.17932	8.15183	4.78698	8.34311	4.23476	7.87018	5.65356	7.14997	5.31757		59.4802	8.32966	53.7665	4.28415	36.3316	5.4292	46.2331	6.02122	47.7797	5.87666	60.9603	7.65273	70.178	6.99416	65.8892	6.83354	51.3731	11.3724	59.7556	6.85419		1.5271	1.6228	1.59218	1.4716	1.40844	1.63641	2.0311	1.5926
8.38691	5.2394	8.00934	4.90119	5.11188	4.16657	10.7283	5.27432	12.6749	5.8404	10.012	4.19983	8.1546	4.84907	8.35864	4.18708	7.86963	5.6397	7.15441	5.31868		59.4504	8.40539	53.7091	4.29563	36.6184	5.43608	46.3983	6.0717	47.6328	5.86289	60.9236	7.65962	70.334	6.89779	65.926	6.86796	52.2887	11.3196	58.4476	6.84501		1.53135	1.62259	1.59813	1.47457	1.40674	1.64491	2.03408	1.58962
8.40299	5.24106	8.03097	4.90119	5.12075	4.1017	10.7133	5.23052	12.6743	5.8282	10.002	4.19595	8.1546	4.86349	8.36529	4.17322	7.86852	5.6275	7.15441	5.32866		59.3953	8.43063	53.6586	4.3071	37.1049	5.44526	46.4947	6.1612	47.502	5.83994	60.9236	7.66191	70.3248	6.78535	65.9053	6.90238	52.7637	11.2232	58.1952	6.85189		1.53008	1.62833	1.59813	1.47457	1.40865	1.64576	2.0328	1.58771
8.40188	5.23718	8.03817	4.90008	5.1468	4.08839	10.7133	5.25547	12.7037	5.82709	10.0358	4.19595	8.15405	4.86016	8.37915	4.14383	7.86131	5.64413	7.15884	5.35084		59.3563	8.41227	52.5641	4.30481	37.277	5.44755	46.4993	6.22315	47.0752	5.77569	60.919	7.67798	70.3203	6.71651	65.8319	7.00105	52.7545	11.1315	57.9772	6.8932		1.51796	1.62429	1.59813	1.47457	1.4044	1.64725	2.0345	1.5909
8.40188	5.22941	8.01267	4.90729	5.15678	4.0895	10.6967	5.29761	12.7819	5.82987	10.0863	4.20094	8.1535	4.85739	8.38858	4.05956	7.88182	5.67906	7.16217	5.36691		59.5743	8.38474	51.185	4.3094	37.1347	5.43608	46.497	6.31035	46.9352	5.67702	60.9098	7.69174	70.2812	6.65685	65.6667	7.20757	52.4402	11.1062	57.6147	6.89779		1.53008	1.62025	1.5943	1.46288	1.39951	1.62556	2.03642	1.59239
8.40521	5.22664	7.99881	4.9583	5.15179	4.09116	10.6629	5.3087	12.8906	5.84317	10.1301	4.19761	8.1535	4.85018	8.3919	4.05124	7.91454	5.69292	7.16882	5.36581		59.9873	8.37097	50.6274	4.33693	36.9649	5.36495	45.9784	6.46868	47.6053	5.58294	60.9098	7.67339	70.2216	6.59719	65.5657	7.48293	52.5916	11.1498	57.5688	6.86796		1.53114	1.63705	1.59643	1.49946	1.38972	1.61833	2.02196	1.60387
8.39523	5.22609	8.04372	5.00432	5.15179	4.14494	10.6401	5.31812	12.9621	5.84927	10.1356	4.20427	8.14352	4.80971	8.40632	4.08285	7.94059	5.68849	7.20153	5.37301		60.5748	8.40539	50.6893	4.38283	36.8547	5.28693	44.9825	6.59489	48.1652	5.53246	60.9465	7.55865	70.0564	6.62931	65.5427	7.71699	53.3925	11.1796	57.3324	6.84501		1.52604	1.6615	1.6111	1.51349	1.38462	1.61876	2.02068	1.61578
8.37361	5.23551	8.10083	5.02649	5.15346	4.25084	10.639	5.33032	13.0148	5.86868	10.1827	4.1954	8.11081	4.7465	8.40854	4.11168	7.96111	5.66298	7.25642	5.40739		61.3091	8.45817	51.3708	4.45396	37.0911	5.25939	43.4313	6.70733	48.1216	5.5141	60.9993	7.39344	69.9393	6.74404	65.5244	7.81566	53.8101	11.159	57.1328	6.81747		1.51817	1.65129	1.62237	1.51753	1.39313	1.62216	2.02961	1.62939
8.36307	5.2272	8.15405	5.0276	5.15013	4.24807	10.6501	5.33088	13.1268	5.89085	10.2154	4.16768	8.03097	4.71712	8.41075	4.1516	7.96721	5.64801	7.37341	5.44121		61.3756	8.46734	51.6187	4.49985	37.4858	5.21579	42.0178	6.84042	47.9633	5.54623	61.0177	7.30624	69.9118	6.82206	65.506	7.82484	54.0143	11.1636	57.3439	6.77846		1.50754	1.65002	1.62599	1.51753	1.42524	1.62003	2.04471	1.62748
8.37638	5.22054	8.1912	5.02705	5.17009	4.18985	10.6795	5.32921	13.2066	5.8964	10.1572	4.15825	7.98661	4.66611	8.4224	4.20538	7.96499	5.64413	7.53198	5.47725		61.192	8.46275	51.6669	4.50903	37.7198	5.11483	42.5822	6.90697	48.0114	5.6013	60.8983	7.27641	69.9646	6.83354	64.9943	7.82254	54.4801	11.1774	57.5848	6.76011		1.51115	1.67022	1.62875	1.51753	1.42758	1.60834	2.07576	1.60961
8.40521	5.20169	8.17013	5.02261	5.20003	4.16213	10.7105	5.31535	13.2343	5.89584	10.1234	4.16213	7.98439	4.58184	8.44069	4.25472	7.94448	5.63914	7.64785	5.51883		61.3596	8.47652	51.6692	4.53657	38.087	5.05975	42.2243	6.95056	47.9265	5.62424	60.7193	7.25576	70.2445	6.83813	64.3839	7.82713	54.8909	11.1682	57.633	6.75781		1.50498	1.68766	1.63726	1.52944	1.42481	1.59813	2.14041	1.60961
8.40632	5.159	8.1474	5.01263	5.21223	4.13496	10.695	5.29927	13.2543	5.89695	10.0918	4.16158	7.9794	4.61233	8.45788	4.27025	7.91842	5.64413	7.71328	5.52992		61.2953	8.49717	51.5613	4.58935	38.3371	5.11253	41.6277	7.02629	48.452	5.64949	60.623	7.2374	70.4281	6.83354	64.2577	7.83172	54.9804	11.1544	57.6628	6.75781		1.50903	1.69106	1.6313	1.5607	1.428	1.59366	2.17401	1.62918
8.3847	5.14403	8.16403	5.01208	5.215	4.13385	10.6368	5.29317	13.2693	5.90139	9.94376	4.15714	7.98384	4.71157	8.46675	4.25638	7.90289	5.67851	7.74266	5.52881		61.153	8.50176	51.4351	4.61459	38.0204	5.17678	41.6231	7.08366	50.0789	5.72521	60.5404	7.23281	70.4166	6.8473	64.3449	7.83172	55.0492	11.1613	57.6697	6.75781		1.50839	1.68893	1.62514	1.56666	1.43523	1.58473	2.17422	1.62918
8.3919	5.14292	8.20839	5.00154	5.21555	4.1588	10.496	5.3281	13.2687	5.91248	9.60112	4.15049	7.99493	4.8025	8.47063	4.30129	7.89402	5.69015	7.77981	5.54821		61.0704	8.51094	51.3594	4.60082	37.8139	5.19743	41.8021	7.11119	51.341	5.82847	60.6803	7.24199	70.4189	6.90008	64.4482	7.83172	55.1777	11.221	57.9543	6.75781		1.51115	1.68085	1.62726	1.57793	1.43502	1.57304	2.17443	1.60664
8.41685	5.12962	8.24221	5.0021	5.27654	4.17766	10.3102	5.45784	13.2587	5.92357	9.279	4.16102	7.98828	4.84686	8.48727	4.34509	7.89569	5.68627	7.80476	5.62195		61.0796	8.53848	51.3433	4.56411	37.7565	5.20202	42.0637	7.18003	52.0042	5.97762	61.0222	7.25117	70.3868	7.02399	64.5744	7.83172	55.2397	11.3219	58.1791	6.76011		1.5086	1.69446	1.62471	1.60642	1.43013	1.5707	2.1755	1.58133
8.44125	5.12075	8.25884	5.01152	5.42624	4.18542	10.1362	5.62362	13.2504	5.92357	9.08384	4.14993	7.96443	4.83022	8.52497	4.29797	7.89735	5.68793	7.8042	5.68793		61.059	8.56601	51.5429	4.48838	37.2196	5.19973	42.1554	7.28788	52.2336	6.17038	61.3848	7.25346	70.4258	7.32689	64.6593	7.83172	55.2236	11.4458	58.1516	6.76011		1.51647	1.74338	1.63428	1.60961	1.43459	1.57474	2.18911	1.55538
8.48782	5.11742	8.27713	5.01651	5.47891	4.18597	9.96538	5.74171	13.2449	5.92634	8.95299	4.11667	7.92618	4.81581	8.5976	4.24751	7.88293	5.72286	7.78813	5.68017		61.0268	8.6142	51.0289	4.38741	36.2076	5.19973	42.1761	7.34525	52.2474	6.27593	61.6854	7.24658	70.5474	7.68715	64.7006	7.82713	55.1066	11.5583	58.1057	6.7624		1.51647	1.76379	1.64087	1.60961	1.43289	1.59324	2.20782	1.55538
8.51831	5.11354	8.3043	5.02427	5.48944	4.18763	9.8545	5.83264	13.2449	5.93188	8.91806	4.11057	7.89846	4.73098	8.70128	4.23476	7.87018	5.73229	7.73601	5.65023		61.0177	8.68534	49.464	4.28186	35.9828	5.19743	42.5409	7.34984	52.252	6.31953	61.6854	7.23969	70.5245	7.8845	64.6891	7.82713	54.7738	11.6179	58.0667	6.78305		1.5086	1.76422	1.64087	1.61238	1.43353	1.61472	2.22079	1.56304
8.50667	5.11409	8.35476	5.03093	5.54766	4.20094	9.81347	5.83597	13.2432	5.92634	8.91196	4.1078	7.92729	4.56188	8.75118	4.25694	7.87406	5.7151	7.69775	5.62861		61.036	8.75418	48.1239	4.15565	35.9713	5.17908	42.6809	7.34525	52.2474	6.3333	62.3968	7.25346	70.5818	7.96022	64.6065	7.83172	54.37	11.673	58.0461	6.8083		1.50839	1.76443	1.63896	1.61153	1.45288	1.61876	2.22951	1.57835
8.49503	5.10578	8.41519	5.03425	5.52326	4.22589	9.81458	5.8842	13.246	5.91137	8.78832	4.12221	7.96499	4.53693	8.72512	4.2708	7.87794	5.68682	7.69165	5.63415		60.997	8.79548	46.7563	4.04321	35.7969	5.14466	42.5203	7.36361	52.1969	6.33559	62.8534	7.25576	70.5268	7.99694	64.5996	7.84549	54.0854	11.7717	58.0369	6.82436		1.50839	1.764	1.63853	1.60749	1.47734	1.61621	2.23717	1.60579
8.48893	5.09081	8.41408	5.0459	5.47281	4.25361	9.84785	6.03002	13.2471	5.89474	8.55324	4.19318	7.93727	4.54414	8.64362	4.27413	7.87517	5.67462	7.65173	5.64413		60.9901	8.7863	45.5171	3.9652	35.7258	5.07811	42.4583	7.37737	52.1442	6.34248	62.8557	7.25576	70.5681	8.01988	64.8085	7.86384	53.9386	11.8038	58.0392	6.82206		1.5052	1.76868	1.63875	1.60621	1.48287	1.60515	2.25376	1.62173
8.48837	5.0897	8.38081	5.06863	5.42568	4.27302	9.88444	6.14146	13.2765	5.86147	8.35753	4.2209	7.87628	4.54414	8.5915	4.31127	7.8602	5.70068	7.7105	5.61974		60.9167	8.75647	45.804	3.89635	35.6661	4.98862	42.4583	7.38885	52.0983	6.34248	62.9199	7.25576	70.536	8.03594	64.9232	7.86155	53.9363	11.7648	58.0438	6.81059		1.5052	1.76656	1.63875	1.60706	1.48606	1.59451	2.30203	1.62386
8.45844	5.10134	8.35975	5.0714	5.44731	4.26969	9.87612	6.18526	13.3081	5.82599	8.2666	4.23365	7.84911	4.54802	8.59815	4.31238	7.84468	5.72397	7.80088	5.55709		60.5449	8.72205	46.8412	3.8344	35.5445	4.92896	42.4537	7.42556	51.9307	6.34936	63.1448	7.25805	70.4075	8.0566	64.9347	7.8409	53.7252	11.7464	58.0782	6.81747		1.50052	1.76911	1.63768	1.60855	1.48712	1.59366	2.33924	1.63513
8.43238	5.10799	8.34034	5.06697	5.53934	4.2769	9.79129	6.18748	13.3092	5.80214	8.20949	4.3268	7.83802	4.55744	8.5976	4.31571	7.82195	5.73506	7.8103	5.47946		59.9667	8.65321	48.9247	3.82293	35.5904	4.9129	42.4056	7.50817	51.66	6.40214	63.2366	7.24658	70.1	8.03365	64.9163	7.81336	53.0528	11.7648	57.9061	6.79223		1.50052	1.76932	1.62748	1.60855	1.48606	1.59047	2.35456	1.6464
8.42184	5.11298	8.32537	5.08027	5.67684	4.30018	9.69759	6.18415	13.2853	5.79771	8.16847	4.44434	7.8103	4.56021	8.59205	4.31571	7.76539	5.76167	7.79367	5.40628		59.0351	8.56601	49.9757	3.85964	35.6891	4.89913	42.4905	7.56324	51.5544	6.4595	63.2779	7.23969	69.5584	7.98546	64.8452	7.80418	52.8234	11.774	57.376	6.77388		1.49754	1.7657	1.61706	1.61982	1.48287	1.59324	2.35987	1.64598
8.41131	5.1152	8.32648	5.08194	5.72563	4.31127	9.66433	6.17084	13.2803	5.83153	8.1546	4.50588	7.7665	4.55855	8.55047	4.31793	7.67835	5.76777	7.79478	5.378		57.5711	8.52701	49.7967	3.90324	35.6982	4.88536	42.4675	7.57931	51.4948	6.48016	63.2756	7.26952	68.9756	7.98546	64.8635	7.795	52.8394	11.7717	57.08	6.77158		1.5018	1.76762	1.62088	1.62237	1.47904	1.58984	2.37114	1.64598
8.40355	5.1152	8.32814	5.06087	5.64912	4.3024	9.64437	6.16253	13.2809	5.86701	8.1546	4.51087	7.71106	4.54802	8.54382	4.32569	7.60904	5.71953	7.78757	5.39353		56.3342	8.52471	50.7673	3.93307	35.7143	4.88536	41.9581	7.58389	51.3892	6.4595	63.1792	7.28329	68.652	7.95334	64.9255	7.78353	52.8211	11.7625	56.8849	6.73945		1.49308	1.76889	1.61918	1.61918	1.47925	1.58601	2.38603	1.64321
8.39745	5.11409	8.32925	5.03814	5.5959	4.31571	9.63217	6.15754	13.2809	5.87866	8.17512	4.50976	7.64619	4.53138	8.57043	4.41551	7.58576	5.6408	7.741	5.40517		55.7697	8.52471	51.0748	3.98355	35.7441	4.90601	41.5382	7.58619	51.3915	6.46639	63.0989	7.26952	68.5809	7.93727	64.8865	7.78124	52.6742	11.774	56.4237	6.74175		1.49605	1.76358	1.60812	1.61153	1.47925	1.58473	2.39347	1.64343
8.39357	5.10633	8.32592	5.06475	5.56984	4.35064	9.63272	6.14534	13.2826	5.88531	8.2289	4.59126	7.61681	4.5142	8.61201	4.63783	7.5852	5.55764	7.71217	5.40683		55.5655	8.52471	51.1529	4.07304	35.7349	5.09647	41.3317	7.58848	51.3341	6.48245	63.0186	7.2351	68.5832	7.92351	64.8796	7.78583	52.4998	11.7786	56.6532	6.75552		1.5069	1.75954	1.60812	1.61131	1.47372	1.58431	2.38114	1.64258
8.39966	5.10023	8.31595	5.09413	5.58037	4.36062	9.63827	6.15754	13.2903	5.88143	8.26217	4.76036	7.61237	4.50699	8.69407	4.93557	7.60073	5.46283	7.68944	5.40961		55.5816	8.53389	51.7747	4.16254	35.712	5.36724	41.3156	7.58848	51.2217	6.50081	62.8304	7.11349	68.5075	7.88679	64.9048	7.78812	52.4425	11.7671	56.9056	6.75552		1.50009	1.7555	1.60812	1.5892	1.46819	1.60621	2.36923	1.62833
8.43071	5.13128	8.31262	5.10411	5.65356	4.33567	9.64936	6.20023	13.292	5.83375	8.27048	4.88179	7.6096	4.52029	8.80163	5.1895	7.61237	5.37634	7.6789	5.40406		55.6321	8.56601	52.1923	4.25662	35.7923	5.51181	41.4877	7.58848	51.1047	6.51228	62.7203	6.95286	68.2803	7.85696	64.462	7.78812	52.4493	11.7969	56.4765	6.75322		1.49775	1.75401	1.60217	1.59132	1.46607	1.61514	2.36009	1.62535
8.48671	5.19338	8.31373	5.10134	5.79715	4.34676	9.66211	6.21353	13.282	5.77221	8.27381	4.93113	7.60738	4.54081	8.90697	5.32644	7.62845	5.35361	7.70995	5.42901		55.4232	8.61879	52.1969	4.41725	35.8451	5.56917	41.4969	7.59307	51.458	6.52146	62.6423	6.89779	68.0623	7.84778	62.6606	7.79042	52.4608	11.8267	56.068	6.74404		1.49903	1.72509	1.60472	1.59175	1.46267	1.62237	2.33946	1.62918
8.5599	5.20003	8.31373	5.10134	6.07659	4.39777	9.63882	6.18027	13.2465	5.74005	8.26771	4.97049	7.6096	4.54524	8.97461	5.35028	7.67613	5.46505	7.7227	5.49776		55.1823	8.65551	51.972	4.62606	35.8107	5.60818	41.4785	7.61373	52.2589	6.51228	62.0709	6.85878	68.1013	7.84778	60.8731	7.7973	52.47	11.8359	54.9551	6.74634		1.49627	1.70212	1.60366	1.58218	1.46224	1.65002	2.32712	1.62918
8.62144	5.18506	8.30319	5.09968	6.3527	4.41662	9.59391	6.16752	13.2349	5.73173	8.23833	4.97715	7.62512	4.54524	8.93081	5.35361	7.66948	5.6031	7.70052	5.53047		54.9643	8.67386	51.7747	4.81881	35.6087	5.63801	41.1458	7.64585	52.6995	6.48245	61.059	6.71421	68.0302	7.84549	60.366	7.80877	52.4608	11.8382	53.9294	6.73716		1.48989	1.70212	1.59941	1.5707	1.4599	1.66278	2.34158	1.63428
8.63585	5.18672	8.27603	5.09635	6.53455	4.38945	9.59502	6.18193	13.2338	5.73617	8.20118	4.97548	7.66504	4.53693	8.75173	5.39353	7.59186	5.52437	7.69942	5.53435		54.6293	8.72435	51.7724	4.97715	34.918	5.71144	41.1618	7.68486	52.9702	6.43656	60.9993	6.61554	67.351	7.86384	60.2466	7.81336	52.4379	11.8658	53.677	6.72798		1.50222	1.70446	1.59941	1.57112	1.45884	1.67235	2.34307	1.64428
8.63807	5.18672	8.25939	5.10245	6.69256	4.38501	9.57063	6.22185	13.1689	5.71288	8.18066	4.96661	7.6789	4.4715	8.51166	5.47447	7.46544	5.36802	7.70274	5.52825		54.1772	8.80237	51.7632	5.11483	34.3742	5.94091	41.0196	7.7101	53.0253	6.3769	60.8088	6.59489	66.775	7.9671	59.9598	7.82025	52.4516	11.9667	53.537	6.7188		1.52561	1.70276	1.61068	1.58005	1.4633	1.67958	2.3435	1.64449
8.67134	5.19227	8.25662	5.11576	6.77684	4.43103	9.56453	6.25456	13.1744	5.67241	8.18565	4.96052	7.68001	4.40331	8.28323	5.53269	7.32628	5.27488	7.70219	5.57039		53.9248	8.82302	51.7632	5.19055	34.3972	6.24381	41.1481	7.68945	53.2456	6.32871	60.522	6.60866	66.7979	8.16215	59.9598	7.83631	52.5159	12.0723	53.6724	6.73487		1.56474	1.70106	1.61216	1.58856	1.47053	1.67851	2.34605	1.63853
8.70183	5.19227	8.25662	5.103	6.77129	4.46707	9.56564	6.26122	13.2266	5.68072	8.26826	4.98546	7.67946	4.35951	8.15128	5.54212	7.22981	5.24716	7.71716	5.62473		53.8789	8.81843	51.4948	5.21809	34.3398	6.45262	41.2032	7.65044	53.8675	6.31494	60.2237	6.58801	66.4652	8.29065	59.7028	7.83631	52.571	12.07	53.9386	6.80371		1.58707	1.70084	1.6094	1.5775	1.46288	1.66214	2.34626	1.63024
8.68742	5.19393	8.25828	5.11354	6.76686	4.46707	9.56952	6.26288	13.2454	5.70789	8.42295	5.02538	7.66615	4.3268	8.11413	5.54544	7.17381	5.26989	7.75153	5.64524		53.8766	8.82761	50.4805	5.23874	34.1906	6.56735	41.2032	7.62749	54.0097	6.29199	59.6294	6.46868	65.9856	8.29983	59.1131	7.80877	52.5503	12.0149	53.9707	6.92303		1.58707	1.6749	1.61195	1.559	1.45373	1.60217	2.34456	1.63449
8.67799	5.17453	8.25718	5.14015	6.76464	4.42937	9.58671	6.26399	13.2482	5.65688	8.51499	5.02926	7.65783	4.32458	8.10415	5.56152	7.1411	5.2965	7.82305	5.65134		53.8812	8.83449	49.9252	5.2571	34.0507	6.65226	41.0448	7.62749	53.9569	6.26905	59.175	6.35395	66.1187	8.31131	59.3678	7.795	52.5985	11.9805	53.9615	7.04006		1.58261	1.66788	1.61621	1.55432	1.44906	1.55751	2.33648	1.64045
8.7107	5.13294	8.25662	5.15789	6.76464	4.41717	9.6549	6.26343	13.2582	5.55986	8.53384	5.05865	7.66948	4.31793	8.09639	5.57982	7.14055	5.31036	7.90733	5.64358		53.9133	8.8322	50.2419	5.26627	34.0782	6.72798	40.9599	7.64585	54.0143	6.24839	59.1406	6.27823	65.7722	8.4421	59.7005	7.78812	52.6054	11.9484	53.9363	7.11349		1.59983	1.67001	1.606	1.56049	1.44502	1.56134	2.33584	1.64385
8.76947	5.10134	8.23833	5.16399	6.77074	4.41883	9.72088	6.26122	13.2798	5.5399	8.53661	5.11742	7.67502	4.31405	8.09528	5.57926	7.12502	5.31646	7.94614	5.62251		54.0051	8.82072	50.5677	5.27545	33.7845	6.76929	40.9599	7.6665	54.051	6.20939	59.2508	6.25069	65.2743	8.64403	59.2599	7.76517	52.4562	11.93	53.9065	7.16167		1.61791	1.68638	1.58558	1.55921	1.44161	1.56432	2.33605	1.64109
8.82436	5.09358	8.17013	5.17397	6.77129	4.42881	9.75137	6.25512	13.3009	5.54322	8.54049	5.12962	7.68001	4.32569	8.09417	5.57316	7.10285	5.32644	7.95612	5.61918		54.0579	8.79778	50.7651	5.29611	33.6376	6.78305	40.953	7.68715	54.0579	6.15661	59.2852	6.30806	65.2972	8.78401	58.8515	7.76976	52.2681	11.9392	53.9042	7.17774		1.63258	1.69723	1.58409	1.55815	1.44034	1.56432	2.3318	1.63024
8.91473	5.09192	8.08308	5.20613	6.76908	4.45543	9.80183	6.2468	13.2798	5.53269	8.56655	5.13294	7.68056	4.32458	8.07421	5.56928	7.09952	5.35804	7.96222	5.61308		54.0143	8.7863	50.944	5.30987	33.6904	6.79682	40.9393	7.68715	54.0579	6.12907	59.2668	6.38837	65.2536	8.82531	58.9456	7.79959	51.7541	11.9254	53.8996	7.14102		1.64087	1.69425	1.58197	1.56219	1.44416	1.56538	2.33393	1.62599
8.99125	5.0897	8.01877	5.23884	6.76741	4.52473	9.90828	6.24846	13.2232	5.53879	8.60813	5.14625	7.68278	4.3146	8.04538	5.56263	7.09896	5.38022	7.96333	5.59756		53.8766	8.82302	50.9188	5.31905	33.5068	6.83124	40.8199	7.66191	54.0051	6.12448	59.1452	6.40214	65.2376	8.82072	58.8171	7.78124	50.889	11.8543	53.9019	7.1089		1.6413	1.69255	1.58346	1.57389	1.4582	1.57665	2.33605	1.6279
8.99956	5.09081	7.97331	5.2394	6.7663	4.62287	10.0036	6.24569	13.1866	5.55653	8.5976	5.14736	7.69443	4.31294	8.03097	5.55542	7.1034	5.378	7.9661	5.59756		53.1722	8.86891	51.1597	5.342	33.2062	6.8473	40.9714	7.64815	53.8652	6.08547	58.9295	6.39296	65.1068	8.91251	58.6404	7.73993	50.3474	11.8382	53.895	7.10201		1.63045	1.6934	1.58431	1.58133	1.46479	1.54773	2.3352	1.62982
9.00178	5.09524	7.92951	5.22332	6.76076	4.72433	10.0735	6.23627	13.1639	5.5593	8.5732	5.14791	7.71106	4.31238	8.02099	5.56928	7.09896	5.38521	7.97053	5.59867		51.1115	8.88497	51.6646	5.3833	33.0158	6.84272	40.7718	7.63208	53.5439	6.03958	58.9318	6.39066	64.7717	9.19934	58.4912	7.756	50.3887	11.8451	53.8697	7.10201		1.63045	1.69106	1.58388	1.57601	1.46245	1.49052	2.33499	1.62726
9.00843	5.09302	7.8846	5.20668	6.74856	4.75094	10.1489	6.23183	13.1284	5.5654	8.56322	5.1468	7.71161	4.32624	8.01489	5.59645	7.08399	5.38854	7.94614	5.58425		49.6085	8.90563	52.0019	5.43838	33.0089	6.84042	40.462	7.59996	53.2341	5.99139	58.996	6.38378	64.6455	9.53207	58.3604	7.75141	49.8954	11.7831	53.7848	7.09742		1.64194	1.69383	1.58388	1.58686	1.47032	1.47436	2.3335	1.62684
9.00843	5.09413	7.85188	5.24328	6.76021	4.75981	10.2143	6.23239	13.0702	5.59922	8.56433	5.15179	7.70496	4.31904	8.03097	5.60588	7.08122	5.39186	7.89735	5.5715		49.519	8.94923	52.151	5.50263	33.0731	6.83813	40.0696	7.53571	53.2226	5.92714	58.723	6.40214	64.5767	9.78908	58.5027	7.72158	48.9247	11.6615	52.7752	7.09054		1.64002	1.69468	1.58558	1.61429	1.47266	1.47032	2.33031	1.62365
9.00788	5.09691	7.84135	5.3026	6.81509	4.77589	10.2504	6.23017	12.9765	5.63304	8.561	5.20502	7.68999	4.28023	8.06035	5.60588	7.09231	5.39186	7.86242	5.5654		49.5397	9.00889	52.2474	5.56229	33.4334	6.83813	39.5854	7.44851	53.202	5.85142	58.1126	6.46409	64.4023	9.89004	58.6931	7.72158	48.3511	11.5583	51.6256	7.08595		1.64279	1.6951	1.58601	1.61684	1.47606	1.4582	2.33031	1.62514
9.0101	5.09635	7.8347	5.32034	6.87331	4.777	10.2664	6.21631	12.8956	5.63027	8.53994	5.2394	7.68445	4.26692	8.09029	5.6336	7.13168	5.41182	7.83692	5.5715		49.9872	9.07314	52.3507	5.59441	33.7156	6.84272	39.567	7.38426	53.2089	5.79175	57.0433	6.5054	64.2256	9.85792	58.8033	7.70781	48.1904	11.5399	51.2882	7.01482		1.63556	1.69893	1.58728	1.61727	1.47776	1.45501	2.32861	1.6262
8.98182	5.10855	7.81751	5.32533	6.91323	4.80361	10.2858	6.20688	12.88	5.60643	8.51166	5.2394	7.69276	4.27634	8.09972	5.66853	7.18435	5.44675	7.8286	5.58592		50.453	9.13509	52.4379	5.62424	33.6904	6.8473	39.5556	7.36131	53.1974	5.75963	55.2144	6.52605	64.182	9.83726	59.0373	7.68257	48.179	11.5491	51.2768	6.88861		1.6362	1.70106	1.58728	1.62748	1.47628	1.48925	2.32797	1.62514
8.93691	5.11132	7.82139	5.3647	6.93042	4.84741	10.3097	6.20189	12.8701	5.59423	8.48283	5.27432	7.70385	4.27025	8.08807	5.69292	7.22482	5.45285	7.8286	5.59811		50.4254	9.16722	52.3071	5.66555	33.6812	6.85878	39.6175	7.34525	53.1997	5.74586	54.1015	6.57194	64.0902	9.85103	59.5468	7.66421	48.2294	11.5789	51.2263	6.73257		1.62407	1.71615	1.58813	1.62875	1.47436	1.51222	2.32819	1.62471
8.94966	5.07972	7.71549	5.42069	6.90935	4.88234	10.3357	6.19856	12.7148	5.59534	8.48948	5.28375	7.70551	4.26636	8.09473	5.70734	7.26419	5.45008	7.8286	5.62029		50.6779	9.19246	51.8413	5.70915	34.2319	6.85878	39.2848	7.30853	53.3649	5.72291	54.3447	6.63619	63.9181	9.8625	60.0241	7.68486	48.2684	11.5927	51.1758	6.54441		1.62875	1.7253	1.59069	1.62811	1.47479	1.51222	2.3284	1.63428
9.03449	5.08803	7.49594	5.47558	6.90048	4.89343	10.3784	6.19801	12.1887	5.57649	8.45899	5.28264	7.71106	4.30351	8.09916	5.71288	7.29967	5.45396	7.8286	5.61364		50.8683	9.21311	51.3731	5.74586	34.2365	6.86107	38.2729	7.28329	53.8812	5.68391	53.9363	6.65914	63.9824	9.8648	60.3591	7.70781	48.2478	11.5858	51.3594	6.41591		1.6296	1.72572	1.58877	1.62684	1.48691	1.50775	2.3284	1.65321
9.15203	5.17453	7.30965	5.48889	6.90048	4.88955	10.3951	6.18748	11.4951	5.49776	8.41796	5.28209	7.71716	4.29575	8.08696	5.70401	7.30466	5.43733	7.82749	5.61253		50.6618	9.21082	51.0014	5.76192	34.3008	6.86337	38.3578	7.26723	54.1635	5.65178	54.6889	6.68897	63.9893	9.86709	60.7125	7.71469	48.1078	11.6179	51.5338	6.3746		1.63279	1.72551	1.56836	1.61961	1.47543	1.512	2.3284	1.66575
9.2485	5.23718	7.20597	5.48335	6.91822	4.88788	10.3746	6.17361	11.0881	5.40351	8.38802	5.28264	7.71383	4.26803	8.14684	5.71011	7.29523	5.39464	7.82749	5.59645		51.1781	9.20852	50.5287	5.74357	33.9061	6.86337	37.8415	7.24887	54.2048	5.64031	57.8831	6.67291	64.104	9.84415	61.059	7.7124	48	11.634	51.5567	6.3769		1.64364	1.7253	1.54773	1.62769	1.45565	1.52774	2.32819	1.66639
9.28343	5.26157	7.18435	5.48723	6.98863	4.89509	10.359	6.16031	10.9229	5.35694	8.36363	5.2649	7.7094	4.25749	8.24498	5.71399	7.3041	5.35749	7.83192	5.62251		51.6462	9.20852	50.0812	5.71374	33.6468	6.86107	37.5776	7.24658	54.1612	5.63113	59.276	6.62472	63.7391	9.83038	60.9236	7.69633	47.9816	11.6133	51.5429	6.3769		1.64725	1.72913	1.55198	1.64045	1.4465	1.52944	2.32797	1.66065
9.22965	5.25825	7.18435	5.50053	7.04518	4.89897	10.354	6.14146	10.8591	5.34252	8.36917	5.23551	7.70773	4.2586	8.32537	5.72452	7.32018	5.35139	7.83636	5.70013		51.8275	9.20852	50.2166	5.68391	33.617	6.87714	37.5156	7.26494	54.2002	5.62883	59.3104	6.5903	63.0943	9.83038	60.4325	7.69174	47.9357	11.595	51.6003	6.37919		1.65129	1.72849	1.54007	1.64109	1.46373	1.52774	2.33308	1.66023
9.05501	5.27211	7.18047	5.50109	7.06182	4.89842	10.3535	6.12261	10.8453	5.36691	8.4479	5.23551	7.71161	4.2769	8.42295	5.76056	7.3163	5.35194	7.83192	5.72009		51.9399	9.20852	50.43	5.67932	33.6353	6.91844	37.5454	7.28329	54.3493	5.61965	59.3288	6.55359	63.4087	9.83038	60.125	7.69633	47.9449	11.595	51.878	6.40673		1.65406	1.73763	1.52816	1.64406	1.46692	1.51434	2.33542	1.67043
8.8787	5.25603	7.18934	5.49832	7.04075	4.9217	10.3612	6.11873	10.8575	5.40961	8.52663	5.23219	7.71882	4.29409	8.49059	5.79161	7.27139	5.35084	7.81197	5.71787		51.9675	9.18787	50.3359	5.67932	33.5688	6.98498	37.0681	7.28788	54.2071	5.59671	59.3884	6.53064	63.5533	9.82808	60.5105	7.69633	48.0114	11.6088	52.1327	6.43426		1.65023	1.73763	1.53454	1.64087	1.45437	1.51498	2.33542	1.67192
8.81937	5.13405	7.19987	5.47836	7.01524	4.9777	10.3707	6.15144	10.853	5.39242	8.54603	5.23995	7.71494	4.38113	8.49503	5.81323	7.1666	5.33199	7.8042	5.69458		51.878	9.16951	50.4163	5.67932	33.5458	7.07218	36.3637	7.27411	53.459	5.54623	59.4665	6.56047	63.9273	9.82579	61.5592	7.70551	48.1377	11.6317	52.1258	6.45721		1.65746	1.74231	1.55624	1.62939	1.43927	1.5103	2.33584	1.6715
8.8288	5.08748	7.23813	5.47946	6.98475	5.0459	10.3507	6.203	10.7993	5.39131	8.54603	5.23829	7.71494	4.45155	8.50113	5.81212	6.96978	5.26434	7.8042	5.66021		51.6164	9.17181	50.3612	5.68161	33.438	7.19609	36.0746	7.26952	52.1281	5.46132	60.1526	6.70733	64.813	9.81432	61.6372	7.71699	48.2891	11.6845	52.073	6.46409		1.6581	1.75975	1.55496	1.60749	1.44502	1.51136	2.3133	1.67043
8.85485	5.09081	7.28304	5.56097	6.9476	5.06087	10.2592	6.23405	10.7377	5.41182	8.55712	5.23773	7.71383	4.4277	8.52275	5.81711	6.77185	5.20447	7.80864	5.67906		51.3181	9.16722	50.1983	5.71603	33.2521	7.30624	35.852	7.28788	50.749	5.33741	60.9878	6.86107	65.194	9.78219	61.729	7.71699	48.2432	11.6615	51.9904	6.4595		1.65767	1.76443	1.55794	1.59792	1.4431	1.52519	2.26652	1.67001
8.8787	5.07972	7.29523	5.653	6.98974	5.052	10.1228	6.2407	10.7172	5.43178	8.60203	5.24383	7.72215	4.41994	8.55823	5.80935	6.63269	5.27765	7.81197	5.73173		51.2653	9.16263	50.2419	5.78258	33.1764	7.34525	35.7464	7.29018	49.7416	5.27545	61.7772	6.91844	65.5359	9.80743	61.7749	7.72387	48.1491	11.5697	52.0111	6.45492		1.65682	1.76379	1.55772	1.59728	1.42311	1.53263	2.24397	1.66533
8.9103	5.06364	7.29911	5.64801	7.08621	5.05699	9.9859	6.22518	10.7166	5.44786	8.68575	5.24605	7.72603	4.4205	8.60924	5.80159	6.56061	5.31424	7.81141	5.76611		51.1207	9.16034	50.2465	5.8583	33.158	7.3659	35.7418	7.29018	49.4273	5.28004	62.3096	6.92532	65.7194	9.98642	61.7749	7.73075	48.2432	11.5491	51.9675	6.49393		1.65661	1.7623	1.55921	1.60111	1.41461	1.53561	2.241	1.66639
8.94744	4.99101	7.303	5.72563	7.17049	5.05976	9.85505	6.20799	10.7194	5.44564	8.75007	5.24716	7.72603	4.44434	8.71181	5.80991	6.54897	5.32422	7.8103	5.77498		50.6847	9.15345	50.1111	5.95009	33.1488	7.39573	35.6982	7.32001	49.425	5.2984	62.5528	6.92532	65.6988	10.2388	61.7428	7.7124	48.3671	11.5491	51.7632	6.58571		1.65236	1.76039	1.55581	1.60706	1.40248	1.54007	2.24036	1.66235
8.97406	4.93224	7.29801	5.83486	7.20819	5.06364	9.74361	6.18748	10.7233	5.4279	8.71957	5.24882	7.74432	4.45044	8.91307	5.80935	6.57669	5.31702	7.81086	5.77276		50.4094	9.15575	50.1248	6.0327	33.158	7.43704	35.8038	7.37278	49.1542	5.32135	62.6056	6.92303	65.708	10.5188	61.6992	7.68257	48.4199	11.533	51.1574	6.63619		1.64981	1.75699	1.53688	1.61812	1.38972	1.52604	2.23993	1.63577
8.97073	4.93002	7.30466	5.93355	7.21151	5.05865	9.65934	6.1847	10.7028	5.51329	8.68631	5.24937	7.7532	4.45764	9.14039	5.80159	6.59665	5.30482	7.81086	5.73506		50.1983	9.1741	49.9757	6.08088	33.1672	7.4531	35.8198	7.41638	48.7297	5.36953	62.3096	6.94827	65.607	10.7368	61.6074	7.6665	48.3878	11.4917	50.0698	6.64996		1.64747	1.74954	1.52285	1.63279	1.3893	1.52179	2.23377	1.62854
9.02451	4.90895	7.3224	6.01505	7.20375	5.0143	9.59059	6.19025	10.6684	5.58203	8.68575	5.24937	7.7665	4.45709	9.30505	5.80325	6.60774	5.33531	7.81474	5.67074		50.251	9.18328	49.8403	6.12219	33.1603	7.45539	35.8451	7.45769	48.3602	5.42461	61.7175	7.08595	65.3293	10.7758	61.2425	7.66421	48.1216	11.4917	49.2299	6.67061		1.64853	1.74805	1.51817	1.63917	1.39291	1.52136	2.2259	1.6296
9.11987	4.88456	7.37563	6.04887	7.19544	4.96606	9.53126	6.16863	10.6623	5.58592	8.6608	5.24937	7.83414	4.4776	9.39321	5.80436	6.65098	5.37135	7.83192	5.64801		50.9303	9.18099	49.8632	6.16579	33.1902	7.45769	35.9598	7.47375	48.1813	5.46591	61.3504	7.25805	65.1572	10.7873	60.857	7.66191	47.8577	11.5238	49.1473	6.7188		1.63598	1.74593	1.51051	1.63577	1.39419	1.52604	2.22887	1.62939
9.16922	4.84741	7.48984	6.06605	7.20043	4.93501	9.48469	6.15532	10.6629	5.56984	8.63364	5.24827	7.94226	4.49257	9.41816	5.81323	6.71696	5.4157	7.84967	5.63083		51.5636	9.18099	49.978	6.18644	33.0938	7.44851	36.0883	7.47375	48.0963	5.49574	61.1117	7.29247	65.35	10.84	60.9603	7.68257	47.798	11.5674	49.3171	6.82206		1.61812	1.73593	1.47819	1.63364	1.38951	1.52434	2.22505	1.62577
9.20082	4.83022	7.60184	6.08102	7.21041	4.89786	9.46639	6.15975	10.6518	5.56429	8.63142	5.23052	8.04483	4.47317	9.41816	5.82155	6.77296	5.43566	7.85743	5.61586		51.3754	9.1764	50.1065	6.2025	32.6922	7.43015	35.8543	7.47605	47.8852	5.5141	60.6299	7.29247	65.5336	10.879	60.8524	7.69404	47.7957	11.5973	49.3653	6.93909		1.61089	1.72551	1.4548	1.59196	1.38271	1.52731	2.22951	1.62195
9.2352	4.82967	7.64175	6.0838	7.21706	4.88345	9.46695	6.18803	10.6008	5.56651	8.61534	5.21001	8.12688	4.46319	9.41539	5.82765	6.84282	5.43345	7.84191	5.63637		51.3181	9.16492	50.0353	6.24839	32.1369	7.41409	35.6822	7.48063	47.5364	5.52328	60.0126	7.30624	65.3752	10.879	60.0218	7.67339	47.798	11.5927	49.3905	6.94139		1.61089	1.72317	1.43013	1.58558	1.3742	1.5305	2.23759	1.60834
9.24296	4.83078	7.64231	6.08324	7.22981	4.89953	9.43701	6.21132	10.517	5.55653	8.60869	5.19892	8.16791	4.46319	9.41871	5.82488	6.88828	5.44953	7.78702	5.72508		51.4971	9.16263	49.9344	6.31494	31.9373	7.4095	35.6822	7.48752	47.4653	5.53475	59.8451	7.33148	65.2628	10.8768	59.8405	7.65962	47.8003	11.611	49.3837	6.87025		1.61599	1.72062	1.42205	1.59111	1.36973	1.53348	2.24142	1.58537
9.24129	4.83133	7.60793	6.08102	7.26696	4.89121	9.39875	6.21908	10.4494	5.53324	8.61977	5.20114	8.179	4.46319	9.43368	5.8149	6.89604	5.45562	7.68278	5.79272		51.6324	9.16263	49.9298	6.35395	31.8937	7.4095	35.7028	7.48981	47.4974	5.56229	59.7694	7.30394	65.3592	10.8836	59.7028	7.65503	47.8049	11.7074	48.7113	6.78305		1.60515	1.72147	1.42162	1.59324	1.37016	1.53391	2.24759	1.58516
9.23464	4.83078	7.58964	6.07659	7.41832	4.88289	9.36327	6.22185	10.4267	5.55875	8.6231	5.21223	8.179	4.46319	9.48469	5.81656	6.90879	5.45729	7.5414	5.82709		51.621	9.1741	49.9183	6.38608	31.8822	7.41409	35.6707	7.49211	47.4814	5.599	59.019	7.27641	65.4946	10.8653	59.7739	7.65044	47.7751	11.8795	47.5227	6.74863		1.57474	1.71913	1.42524	1.58707	1.37016	1.54496	2.24567	1.58175
9.23021	4.81969	7.6656	6.07548	7.82583	4.88844	9.3483	6.22185	10.4866	5.56485	8.62532	5.215	8.16237	4.47483	9.5795	5.81545	6.95149	5.41182	7.40168	5.84428		51.4374	9.19017	49.9046	6.42967	31.6619	7.42786	35.3862	7.4967	47.4883	5.62654	58.404	7.27641	65.5014	10.8515	60.1113	7.63438	47.6213	12.0654	47.1762	6.73487		1.55028	1.71849	1.42035	1.58707	1.36676	1.55602	2.23866	1.58771
9.22799	4.81858	7.84357	6.04332	8.30541	4.89232	9.35773	6.23183	10.5426	5.49055	8.62532	5.215	8.10914	4.52029	9.68373	5.81212	6.99639	5.37246	7.28359	5.77775		51.6898	9.19934	49.9	6.48016	30.1245	7.43474	35.2921	7.49211	47.5594	5.64949	58.3375	7.28329	65.3248	10.8607	59.9919	7.61373	47.5984	12.21	47.1578	6.71651		1.5388	1.71445	1.41354	1.58303	1.36676	1.55581	2.24015	1.58962
9.223	4.77755	7.99437	5.95683	8.64029	4.89177	9.37103	6.23737	10.608	5.44509	8.62698	5.19615	8.05204	4.55134	9.8423	5.79272	7.05295	5.37523	7.21983	5.70179		52.0111	9.20393	49.8495	6.53064	29.5485	7.42786	35.3104	7.47834	47.7935	5.66555	58.3742	7.29018	64.9576	10.8997	59.8634	7.5816	47.5158	12.3247	47.229	6.6775		1.53327	1.71318	1.41354	1.57644	1.34166	1.56134	2.23866	1.59558
9.223	4.77034	8.04815		8.78888	4.89343	9.37713	6.24292	10.6612	5.44731	8.62033	5.18118	8.0354	4.55911	10.1689	5.78662	7.12558	5.37135	7.22981	5.68072		52.1006	9.19705	49.7898	6.58801	29.5347	7.41638	35.1727	7.46228	47.938	5.66325	58.326	7.29018	65.1618	10.9135	59.6753	7.5403	47.2175	12.3981	47.4309	6.63161		1.51009	1.71318	1.40971	1.59919	1.32529	1.56432	2.24121	1.60685
9.22965	4.76979	8.04427		8.81216	4.88678	9.3666	6.25234	10.6551	5.44398	8.60869	5.18118	8.0354	4.58849	10.6235	5.78274	7.1655	5.37412	7.26862	5.67629		52.1166	9.18099	50.0101	6.65914	29.5003	7.39114	34.6909	7.43933	47.9678	5.66784	58.147	7.29018	65.5336	10.8974	59.276	7.48752	46.8159	12.4096	47.5755	6.61095		1.50456	1.70914	1.39504	1.61812	1.32529	1.57027	2.24504	1.60898
9.23021	4.76591	8.0293		8.80717	4.884	9.34054	6.26787	10.6435	5.45618	8.60259	5.1773	8.00713	4.60401	10.9345	5.73838	7.17049	5.36414	7.28803	5.67462		52.1487	9.15345	51.0978	6.72798	29.4865	7.33378	34.3214	7.38426	48.5759	5.67473	58.0047	7.29247	65.4372	10.8974	59.0419	7.44163	45.9623	12.4119	47.5342	6.63161		1.50669	1.7051	1.37292	1.61812	1.32486	1.57176	2.24695	1.60898
9.21468	4.76591	8.00879		8.80496	4.884	9.31892	6.32719	10.6778	5.46283	8.61368	5.1773	7.91398	4.59071	11.0887	5.67241	7.17215	5.35084	7.27749	5.6835		52.1028	9.10756	51.7495	6.77617	29.5003	7.28559	34.3008	7.30853	48.9523	5.68849	57.9703	7.30853	65.6185	10.8997	58.9846	7.39114	44.7369	12.4325	47.5686	6.64767		1.50754	1.70106	1.38058	1.61514	1.33826	1.59473	2.25376	1.61302
9.18807	4.76314	7.96		8.80496	4.88068	9.32335	6.43198	10.72	5.45174	8.64583	5.17563	7.84468	4.58572	11.1885	5.6275	7.19654	5.34862	7.25421	5.71898		51.8045	9.0456	51.7931	6.806	29.4957	7.25805	34.3031	7.24658	48.966	5.69538	57.9611	7.3223	65.9856	10.879	58.9777	7.37278	44.4616	12.4463	47.8462	6.64767		1.49669	1.70148	1.37888	1.60408	1.34443	1.59622	2.25376	1.61706
9.15369	4.76203	7.91731		8.80939	4.87347	9.38988	6.55784	10.7205	5.45174	8.72013	5.17563	7.86907	4.59403	11.2528	5.59534	7.24533	5.34973	7.23369	5.72619		51.5407	8.98594	51.8091	6.8496	29.4682	7.26723	34.3168	7.22134	48.9752	5.68849	57.9772	7.3223	66.1417	10.8607	58.9731	7.40032	44.6383	12.4486	48.1055	6.63161		1.48882	1.69957	1.36527	1.60536	1.31168	1.59451	2.25354	1.61706
9.10878	4.76535	7.92008		8.83212	4.88123	9.49134	6.72306	10.7222	5.46061	8.87814	5.16455	7.92618	4.60124	11.2811	5.55043	7.2969	5.34806	7.18823	5.73229		51.5865	8.93546	51.8229	6.90238	29.3764	7.34525	34.3306	7.22363	48.9798	5.66784	57.991	7.35672	66.0063	10.8928	58.9731	7.4095	44.6314	12.4417	48.1629	6.62013		1.47628	1.69638	1.35931	1.60323	1.29063	1.59622	2.25439	1.61535
9.05833	4.76314	7.93339		8.89699	4.88345	9.57395	6.77019	10.7161	5.46893	9.06277	5.13904	7.95168	4.59348	11.2578	5.51384	7.34569	5.3209	7.17936	5.72231		51.1138	8.90104	52.3966	6.93221	29.3603	7.42327	34.3375	7.22593	48.9798	5.6449	57.9795	7.40032	65.327	10.8813	58.9318	7.43015	44.7232	12.4417	47.9426	6.62013		1.47415	1.68745	1.35953	1.60706	1.29403	1.59622	2.25503	1.6145
9.02617	4.76258	7.93838		8.95133	4.88456	9.60667	6.79014	10.6823	5.48612	9.16146	5.07972	7.94115	4.57906	11.2434	5.5033	7.39171	5.32311	7.21207	5.70567		50.2602	8.88039	53.0207	6.94598	29.2686	7.43245	34.3467	7.23052	48.9821	5.65637	57.9543	7.41868	64.7947	10.7758	58.2159	7.41179	44.7163	12.4279	47.603	6.59948		1.4867	1.68893	1.34996	1.60834	1.29934	1.58473	2.24716	1.61535
8.99402	4.77312	7.94392		8.9663	4.88788	9.605	6.86832	10.6407	5.53768	9.21468	5.01984	7.90844	4.58516	11.4313	5.5033	7.40778	5.32422	7.2226	5.6591		49.7898	8.86891	53.1148	6.96663	29.1309	7.43015	34.3513	7.2374	48.9867	5.6862	57.8992	7.40491	64.6616	10.7046	56.8941	7.38426	44.7897	12.3293	47.4263	6.59719		1.4867	1.69255	1.34996	1.60855	1.29552	1.60706	2.2344	1.62365
8.94855	4.75648	7.94392		8.96408	4.89565	9.59447	6.92265	10.6723	5.57372	9.27512	5.02483	7.87074	4.65724	11.8238	5.49942	7.40113	5.30925	7.20431	5.60865		49.6475	8.86432	53.0689	6.98728	29.2066	7.42786	34.3604	7.23281	48.9339	5.70685	57.8831	7.38655	64.5216	10.7069	56.1139	7.38426	44.5442	12.2742	47.1509	6.61095		1.47564	1.69446	1.35336	1.60451	1.29509	1.61514	2.23249	1.62535
8.92638	4.72488	7.94448		8.96297	4.89232	9.58671	7.00915	10.7593	5.57372	9.32501	5.00709	7.74432	4.69272	12.1759	5.49832	7.3906	5.2832	7.19266	5.59867		49.6453	8.83679	53.1056	7.00105	29.4315	7.43015	34.3444	7.23052	48.8903	5.72291	57.8304	7.37278	64.2279	10.7138	55.5196	7.38196	44.0072	12.2765	46.653	6.64078		1.48095	1.6968	1.36867	1.6043	1.28977	1.61493	2.2259	1.62514
8.94689	4.71656	7.94281		8.92527	4.87458	9.58449	7.05738	10.8087	5.56485	9.35384	4.99877	7.48707	4.66168	12.4465	5.50441	7.38283	5.26268	7.19599	5.59922		49.6774	8.79778	53.0987	7.00793	29.7413	7.43933	34.3077	7.22593	48.8765	5.7275	57.6009	7.3682	63.863	10.7001	55.0308	7.38885	43.624	12.2903	46.3386	6.64078		1.50031	1.70573	1.38037	1.60472	1.29509	1.61493	2.21973	1.62471
8.95687	4.71656	7.92951		8.90087	4.89343	9.59281	7.06403	10.7649	5.52493	9.37214	5.0021	7.36454	4.69882	12.6544	5.50719	7.38283	5.25492	7.20043	5.59423		49.6843	8.76795	53.0276	7.00793	29.973	7.44851	34.2687	7.2374	48.8444	5.71374	57.314	7.36361	63.7024	10.6794	54.9827	7.38885	43.6791	12.3155	46.2767	6.63849		1.51945	1.71977	1.38271	1.59962	1.31763	1.61578	2.21888	1.62322
8.91861	4.72155	7.93283		8.91861	4.94222	9.60057	7.06903	10.705	5.4778	9.39598	5.01707	7.32573	4.81969	12.7758	5.50774	7.38173	5.25159	7.21096	5.57871		49.6957	8.72894	52.8945	7.01252	29.9822	7.4531	34.1975	7.27641	48.8421	5.68391	56.8758	7.37508	63.6382	10.6542	53.0414	7.42327	43.6286	12.3385	46.3432	6.63619		1.5388	1.71977	1.38228	1.59366	1.33805	1.61557	2.23036	1.62216
8.84654	4.67942	7.93782		8.90864	4.95109	9.59059	7.11282	10.7571	5.44564	9.4165	5.05532	7.27749	4.93667	12.8113	5.5094	7.38117	5.25381	7.23535	5.56651		49.7302	8.68534	52.7109	7.01023	30.1841	7.44851	34.1516	7.30624	48.4635	5.6449	56.5109	7.38885	63.6864	10.6014	49.9459	7.46228	43.7594	12.3408	46.2698	6.6339		1.54241	1.71956	1.38334	1.5875	1.33698	1.61854	2.24015	1.63003
8.7728	4.62453	7.95944		8.89865	4.94111	9.58671	7.16272	10.8652	5.43067	9.41927	5.10411	7.22205	5.05477	12.8296	5.5022	7.37895	5.26767	7.25642	5.56707		49.7347	8.65092	52.6972	7.01023	30.6224	7.47834	34.1493	7.3223	47.9174	5.62424	56.5063	7.38655	63.7621	10.5739	48.0619	7.40032	43.904	12.343	45.8774	6.64996		1.54901	1.71934	1.38824	1.5792	1.33677	1.62237	2.24759	1.65002
8.70738	4.63063	8.02986		8.91529	4.94555	9.58671	7.19433	10.919	5.43067	9.42149	5.18284	7.18601	5.23829	12.8706	5.52326	7.38283	5.27266	7.28525	5.56097		49.6911	8.6142	52.6375	7.00793	30.689	7.538	34.1562	7.31083	47.7177	5.61277	56.2379	7.36361	63.7277	10.6014	47.4332	7.25346	43.904	12.3385	45.7902	6.68438		1.55943	1.71573	1.38377	1.57644	1.34188	1.6245	2.25503	1.63811
8.62421	4.63229	8.09805		8.94634	4.94998	9.5978	7.18268	10.9562	5.41681	9.40153	5.28209	7.13334	5.51661	12.9094	5.58314	7.39004	5.24106	7.34402	5.55487		49.6911	8.57519	52.3507	7.01252	30.4342	7.61831	34.1837	7.25117	47.6604	5.58523	55.8294	7.36131	63.707	10.6358	47.9105	7.15479	43.8994	12.3453	45.9967	6.7188		1.56028	1.70361	1.38866	1.58048	1.34209	1.62046	2.25439	1.61599
8.4723	4.63007	8.15183		8.99291	4.93168	9.57617	7.19987	10.9994	5.43123	9.34109	5.34529	7.02467	5.74559	12.9349	5.63748	7.40279	5.16787	7.39392	5.55764		49.7118	8.52701	51.7219	7.00793	30.0694	7.80189	34.1929	7.1938	47.6259	5.5554	55.3865	7.39803	63.7758	10.6633	49.6613	7.1938	43.8283	12.3476	46.2262	6.73487		1.54986	1.68638	1.40844	1.58048	1.33996	1.62684	2.25971	1.61684
8.29876	4.61455	8.24664		9.03227	4.9145	9.49633	7.21706	11.0199	5.46782	9.31503	5.35084	6.93707	5.82432	12.9283	5.68294	7.42109	5.06198	7.40945	5.53768		49.7554	8.46505	51.1965	6.99646	29.8698	8.0107	34.1424	7.18692	47.6236	5.55081	54.6568	7.43474	63.7506	10.6679	49.6453	7.26494	43.7571	12.3017	46.2491	6.71651		1.54986	1.65725	1.43459	1.57963	1.34443	1.61578	2.25695	1.61812
8.19231	4.61067	8.41741		9.08273	4.9206	9.4675	7.21761	11.0094	5.47614	9.30117	5.34862	6.91766	5.81989	12.9227	5.71787	7.41832	4.98657	7.41665	5.54433		49.76	8.41686	51.1345	6.98269	30.074	8.12544	34.1562	7.20068	47.6122	5.56917	54.2346	7.43245	63.6978	10.5716	48.2639	7.29706	43.7365	12.2077	46.2445	6.69127		1.54539	1.62535	1.45054	1.57176	1.34698	1.58899	2.24844	1.61812
8.14573	4.59792	8.5416		9.20027	4.9217	9.47527	7.22039	10.995	5.48168	9.3106	5.34751	6.91267	5.85814	12.9294	5.73395	7.42885	4.99212	7.42386	5.60532		49.76	8.37097	51.1804	6.9804	30.3723	8.18739	34.1906	7.20527	47.6007	5.58753	54.4778	7.43245	63.5349	10.4775	48.0918	7.31542	43.7961	12.0837	46.2767	6.6752		1.53433	1.58324	1.45203	1.57389	1.34528	1.59069	2.24823	1.61302
8.14407	4.56354	8.5161		9.33998	4.92725	9.46917	7.21928	10.955	5.47725	9.36161	5.3209	6.91212	5.91248	12.9322	5.74337	7.43495	4.96939	7.4283	5.71676		49.7279	8.27689	51.1161	6.9804	30.4595	8.25164	34.1975	7.21904	47.5915	5.599	54.7647	7.4072	63.2504	10.4385	48.0298	7.35902	43.8466	11.9966	46.4304	6.65226		1.52497	1.54582	1.44884	1.58133	1.34039	1.59664	2.22887	1.60579
8.19563	4.54469	8.45733		9.43756	4.93778	9.44311	7.18102	10.8575	5.47337	9.41317	5.30593	6.91545	5.94796	12.9344	5.74116	7.43661	4.94444	7.42109	5.8343		49.7233	8.17592	51.185	6.9804	30.4021	8.32966	34.1906	7.2351	47.5938	5.6013	54.6889	7.29936	63.3422	10.4201	47.961	7.4095	43.8443	11.9644	46.7608	6.62702		1.52646	1.54284	1.45777	1.57048	1.33869	1.59664	2.20548	1.61302
8.22446	4.5458	8.44735		9.54623	4.93945	9.39155	7.1156	10.7144	5.45895	9.49079	5.30814	6.93097	5.96903	12.9355	5.7345	7.44382	4.93778	7.41222	5.88975		49.7187	8.11167	51.4007	6.99416	30.3975	8.39621	34.1769	7.24658	47.5869	5.59212	54.5696	7.16856	63.4867	10.4109	47.9541	7.42786	43.8902	12.0011	47.0637	6.61095		1.52136	1.54284	1.46692	1.5607	1.34358	1.61472	2.18996	1.59451
8.20173	4.54746	8.52552		9.64769	4.94499	9.32002	7.06126	10.6285	5.45341	9.57174	5.3026	6.92487	5.97069	12.9355	5.70789	7.44216	5.01485	7.44937	5.87699		49.7715	8.06578	51.4053	7.04006	30.5375	8.43292	34.1677	7.25346	47.5273	5.58065	54.6453	7.09972	63.4454	10.4316	47.9816	7.4072	44.5006	12.008	47.1372	6.58571		1.52093	1.51774	1.46586	1.55857	1.35123	1.62046	2.1823	1.57452
8.19951	4.53416	8.67411		9.65934	4.95774	9.23797	7.01746	10.6124	5.45618	9.57395	5.28985	6.93263	5.9718	12.9272	5.67352	7.38838	5.09801	7.5353	5.97236		49.9413	7.98776	51.5429	7.09742	30.8198	8.44899	34.17	7.26952	47.5043	5.58753	54.8771	7.09742	63.6542	10.4362	47.9587	7.39344	46.6163	11.9346	46.9375	6.5467		1.5254	1.50988	1.46011	1.55815	1.36484	1.61833	2.17975	1.57474
8.20617	4.49036	8.77169		9.65324	4.93113	9.167	6.99362	10.6252	5.39408	9.47915	5.28486	6.90048	5.95794	12.9072	5.63859	7.32129	5.10245	7.60516	6.29892		50.0744	7.92351	51.6141	7.13873	31.0813	8.47882	34.1654	7.3246	47.4951	5.59212	55.0423	7.11808	64.8865	10.4339	47.9128	7.4508	48.2432	11.8841	46.5819	6.5031		1.53454	1.52519	1.45777	1.56219	1.36973	1.62259	2.17847	1.57537
8.26383	4.45986	8.80218		9.66599	4.87569	9.09603	6.9842	10.664	5.35694	9.41372	5.29761	6.82119	5.94907	12.88	5.61974	7.2847	5.10522	7.59241	6.62714		50.0445	7.88679	51.6714	7.17315	31.1663	8.51324	34.1746	7.39344	47.4883	5.55999	55.1616	7.10201	65.249	10.4499	48.3786	7.59307	48.3878	11.8703	46.575	6.44115		1.54071	1.52965	1.45884	1.57389	1.37144	1.63386	2.17507	1.5792
8.2483	4.44877	8.78888		9.68595	4.86792	9.03948	6.97311	10.6812	5.35084	9.38046	5.33309	6.66651	5.94907	12.8451	5.61419	7.26918	5.16621	7.54417	6.81898		50.0032	7.87532	51.8986	7.21675	31.1502	8.53159	34.1883	7.43474	47.4974	5.53016	55.3337	7.08825	65.1848	10.489	49.223	7.73075	48.3625	11.8703	46.7195	6.41591		1.54688	1.53135	1.45395	1.57261	1.36442	1.63917	2.17784	1.57623
8.10304	4.46097	8.7728		9.68429	4.86959	9.05334	6.96202	10.6606	5.35028	9.35717	5.35527	6.44861	5.95129	12.7974	5.61475	7.2725	5.43733	7.48762	6.90713		50.095	7.89138	51.9078	7.26723	31.1479	8.54995	34.2067	7.44392	47.525	5.5141	55.3957	7.09283	65.1159	10.5165	49.5833	7.81795	48.6402	11.9025	46.809	6.45721		1.55071	1.51881	1.45714	1.57984	1.36314	1.63917	2.17784	1.56751
8.06423	4.51309	8.75783		9.72975	4.86792	9.08384	6.97921	10.6318	5.35084	9.36105	5.35583	6.33052	5.95628	12.7448	5.61696	7.28304	5.68793	7.41111	6.91434		50.469	7.8845	51.8367	7.30853	31.1227	8.57519	34.2113	7.44163	47.5479	5.50951	55.398	7.13873	65.0586	10.5257	49.7164	7.86384	49.3561	11.9507	46.8297	6.50769		1.5422	1.50754	1.45969	1.58027	1.35719	1.63917	2.16997	1.55305
8.25329	4.58627	8.77169		9.89165	4.87735	9.08273	7.00138	10.5597	5.35305	9.36826	5.37468	6.30169	5.95739	12.6877	5.61696	7.28747	5.68959	7.3346	6.91877		50.3933	7.79959	51.8849	7.33378	31.0997	8.62797	34.1562	7.44851	47.5387	5.5141	55.3865	7.17315	65.0609	10.5188	49.76	7.89368	49.8242	11.8818	46.5153	6.54211		1.53157	1.50817	1.45161	1.5809	1.35017	1.63917	2.14764	1.55602
8.53051	4.57962	8.76781		9.99144	4.88234	9.01065	6.98198	10.4233	5.36359	9.37879	5.39575	6.26399	5.99342	12.6427	5.61641	7.29135	5.66631	7.27139	6.92487		50.1937	7.69863	52.3071	7.36361	31.0813	8.7037	34.1218	7.47375	47.4102	5.50951	55.3452	7.14561	65.2031	10.505	49.7279	7.90056	49.9321	11.735	46.3937	6.53293		1.53284	1.51158	1.44693	1.58431	1.35123	1.64747	2.13148	1.5556
8.70848	4.68773	8.74729		9.99477	4.87014	8.82436	6.97588	10.2382	5.39907	9.37547	5.434	6.22241	6.0217	12.6378	5.60698	7.2664	5.66797	7.22094	6.92931		50.2258	7.67109	53.1538	7.40491	30.9896	8.75188	34.1218	7.51047	47.2519	5.50722	55.3337	7.12037	65.2353	10.5096	49.7072	7.90285	50.0308	11.6501	46.3983	6.50081		1.53135	1.51264	1.44629	1.58601	1.35123	1.64279	2.1251	1.55496
8.77557	4.98546	8.74729		9.98368	4.84408	8.63419	6.99307	9.94432	5.49222	9.32224	5.46948	6.21686	6.03833	12.6649	5.61641	7.23979	5.66076	7.2165	6.93873		50.1432	7.6665	53.638	7.43474	30.9506	8.77024	34.186	7.54947	47.2037	5.50492	55.3315	7.14561	64.8107	10.5257	49.2253	7.92121	50.1501	11.5812	46.4075	6.5031		1.51945	1.51626	1.44374	1.58813	1.35485	1.63534	2.11638	1.55496
8.78056	5.18894	8.74009		10.028	4.81913	8.55768	6.98641	9.60611	5.61475	9.24628	5.47725	6.21631	6.06217	12.6694	5.60199	7.21207	5.63471	7.18324	6.95537		50.1707	7.66191	53.6976	7.44851	31.0768	8.78171	34.3513	7.58389	47.1372	5.48886	55.3315	7.20298	63.9411	10.5142	48.5989	7.93268	50.212	11.4321	46.2101	6.5054		1.50009	1.52965	1.44863	1.60132	1.35612	1.66129	2.11468	1.55815
8.78111	5.23108	8.72512		10.1217	4.79419	8.51443	7.01913	9.47249	5.67795	9.14039	5.47836	6.21631	6.06883	12.64	5.58536	7.17936	5.60865	7.06903	6.96368		50.2602	7.67109	53.6976	7.45539	31.1823	8.78401	34.4063	7.60455	47.0362	5.47509	55.3292	7.25117	62.7387	10.4844	48.4589	7.93727	50.2579	11.2806	45.9554	6.50999		1.49648	1.52264	1.45671	1.6111	1.35634	1.70467	2.1268	1.59281
8.785	5.21167	8.70627		10.1456	4.7709	8.41962	7.1217	9.45974	5.69126	9.00178	5.47337	6.23239	6.06938	12.5801	5.58536	7.1666	5.6275	7.00804	6.96368		50.2006	7.67798	53.5829	7.46457	30.7578	8.78401	34.4912	7.6229	47.0339	5.46591	55.2879	7.27411	61.355	10.4476	48.4038	7.93727	50.2946	11.221	45.9256	6.54211		1.50881	1.53476	1.45544	1.62705	1.35676	1.70978	2.09958	1.59494
8.78333	5.21999	8.6852		10.1533	4.76757	8.27325	7.18213	9.498	5.69736	8.93747	5.46061	6.30391	6.06883	12.4864	5.56097	7.17769	5.6591	6.99806	6.9598		50.056	7.67339	53.6999	7.47605	30.5857	8.81384	34.4614	7.67109	46.6622	5.44526	55.2787	7.29706	59.7923	10.4132	48.2294	7.90744	50.2992	11.198	45.8705	6.60866		1.51115	1.54603	1.45501	1.65555	1.35697	1.71211	2.02642	1.59898
8.77668	5.20447	8.68076		10.242	4.76979	8.12189	7.20153	9.56675	5.70346	8.9358	5.47004	6.45804	6.06994	12.386	5.51994	7.20431	5.64746	7.00804	6.9975		49.994	7.6665	53.9042	7.4967	30.6155	8.88039	34.0116	7.72387	46.3294	5.43608	55.2443	7.3246	58.3283	10.4155	48.3534	7.86614	50.2533	11.2003	45.6709	6.64767		1.51285	1.53582	1.45501	1.66023	1.35719	1.71998	2.00473	1.59558
8.74286	5.20502	8.68575		10.4428	4.76868	8.0099	7.21429	9.59724	5.7345	8.93968	5.47503	6.58999	6.08491	12.3323	5.49832	7.21096	5.63526	7.00748	7.04518		50.0216	7.65962	53.7665	7.52423	30.7853	8.95152	33.5596	7.74911	46.2078	5.44985	55.2557	7.33148	57.8372	10.4201	48.7848	7.83631	50.2419	11.1774	45.6433	6.65914		1.51541	1.53412	1.45544	1.66023	1.3608	1.72806	2.00133	1.59047
8.70017	5.19948	8.65027		10.5841	4.76757	7.94725	7.22981	9.70147	5.77886	8.94079	5.47836	6.70809	6.09489	12.3162	5.48612	7.19821	5.67407	7.00249	7.04241		50.0744	7.65044	53.6426	7.538	31.1249	8.99971	33.3232	7.71928	46.1505	5.44296	54.8863	7.33378	58.3214	10.4201	48.966	7.80877	50.251	11.1223	45.7328	6.66373		1.52455	1.53114	1.45373	1.65619	1.3557	1.73636	1.98666	1.58261
8.65082	5.2089	8.60702		10.6606	4.77478	7.88792	7.23258	9.88167	5.77941	8.94079	5.47614	6.80345	6.08546	12.309	5.49277	7.18934	5.75724	7.02522	7.08898		50.0927	7.64815	53.6701	7.54947	31.3085	9.02724	33.3439	7.66191	46.1367	5.39478	54.0487	7.33607	58.2617	10.4201	48.9546	7.79271	50.2212	11.1544	45.8338	6.66603		1.52476	1.54284	1.45054	1.65661	1.34592	1.75443	1.98496	1.58473
8.61035	5.20779	8.58984		10.6934	4.79308	7.91564	7.21429	10.0303	5.7966	8.9419	5.47337	6.84282	6.07714	12.3023	5.50386	7.11116	5.78385	7.04851	7.13168		50.0239	7.66191	53.9868	7.57013	31.3429	9.06166	33.1052	7.61373	46.1367	5.3856	53.6403	7.33148	58.388	10.4201	48.9477	7.7973	49.861	11.221	45.882	6.66144		1.52434	1.55347	1.44821	1.65895	1.34783	1.76464	1.9907	1.58409
8.6037	5.20336	8.58041		10.6967	4.80915	8.09251	7.21151	10.0668	5.80603	8.92139	5.48113	6.86	6.0777	12.2957	5.49443	6.96645	5.78108	7.079	7.12114		49.8862	7.68257	55.0331	7.58619	31.3338	9.09149	32.8299	7.59996	46.1367	5.40854	53.2204	7.36131	56.9538	10.4155	48.81	7.80648	49.2735	11.2646	45.882	6.66832		1.52519	1.54156	1.43566	1.66086	1.34783	1.7657	1.98389	1.58452
8.6037	5.23163	8.57376		10.7039	4.81026	8.14407	7.22094	10.0813	5.81157	8.89755	5.49333	6.84503	6.0777	12.2885	5.49	6.91711	5.78607	7.135	7.11449		49.6384	7.68945	56.0405	7.59078	31.476	9.10985	32.7565	7.59537	46.1367	5.41772	52.587	7.46228	54.2277	10.4155	48.7962	7.85926	48.6241	11.3311	45.921	6.6752		1.53284	1.5422	1.43736	1.66937	1.35059	1.76974	1.98028	1.58452
8.59261	5.24605	8.55879		10.7349	4.79973	8.10138	7.20264	10.0835	5.82377	8.95022	5.48501	6.77351	6.08269	12.2829	5.49942	6.91046	5.78385	7.21262	7.09176		49.0831	7.68945	56.0841	7.59766	31.7147	9.1328	32.7679	7.57472	46.139	5.42231	52.2497	7.59537	52.5228	10.4155	48.8674	7.92351	47.6305	11.3701	46.0082	6.6775		1.53582	1.58516	1.43417	1.65852	1.36676	1.77379	1.99495	1.58494
8.57653	5.23718	8.49392		10.741	4.77811	8.07199	7.1716	10.0513	5.81601	9.03283	5.49721	6.67482	6.08158	12.2829	5.49887	6.91489	5.78662	7.26696	7.04574		48.0757	7.68715	56.4673	7.61602	31.7124	9.1764	32.7771	7.538	46.1413	5.42002	52.2543	7.78353	52.0983	10.4201	48.8352	7.96481	46.7677	11.3563	45.96	6.6752		1.53582	1.61046	1.4531	1.65427	1.36931	1.77379	2.01622	1.5858
8.5854	5.23441	8.3858		10.7233	4.77367	8.07643	7.13888	10.0153	5.81989	9.05002	5.50275	6.60774	6.08934	12.279	5.53491	6.94871	5.81046	7.2725	7.01081		46.9995	7.68027	57.08	7.62979	31.6458	9.23835	32.7771	7.51964	46.1413	5.41543	52.2245	7.94645	52.33	10.4247	48.8421	8.01988	46.7654	11.3403	45.6502	6.64996		1.53582	1.60302	1.45714	1.65831	1.36931	1.76315	2.0243	1.59813
8.60037	5.23884	8.30208		10.7172	4.79529	8.10083	7.07734	9.97093	5.84428	9.03837	5.5033	6.61273	6.09655	12.2757	5.56263	6.96645	5.82488	7.24755	6.98198		46.5314	7.6665	57.2659	7.6252	31.5357	9.29572	32.7679	7.50817	46.1528	5.40625	52.2635	7.95104	52.4861	10.4316	48.8444	8.05889	46.2721	11.3563	45.3978	6.58112		1.53582	1.60579	1.45395	1.66193	1.37399	1.74678	2.01558	1.60876
8.59649	5.27377	8.25329		10.7144	4.80195	8.16403	7.00249	10.007	5.84927	9.02839	5.49499	6.70033	6.10597	12.274	5.57815	6.97754	5.80214	7.21761	6.93818		46.6622	7.6252	57.4173	7.62979	31.5219	9.34161	32.7679	7.50358	46.2124	5.39478	52.1304	7.82254	52.3621	10.4362	48.8765	8.05201	45.5447	11.377	45.368	6.45033		1.53454	1.60579	1.45395	1.64555	1.38249	1.74529	2.00133	1.60876
8.58429	5.35915	8.20728		10.7122	4.80416	8.24331	6.96091	10.1378	5.86147	8.9979	5.49554	6.77462	6.12926	12.2724	5.63415	6.97754	5.79882	7.21096	6.91766		46.7907	7.54489	57.5045	7.66191	31.5173	9.37144	32.7794	7.50817	46.256	5.39478	51.777	7.70092	52.3874	10.4499	49.028	8.0543	45.368	11.3908	45.384	6.28281		1.53667	1.61004	1.44821	1.62811	1.37016	1.74465	2.01154	1.61089
8.566	5.37135	8.14296		10.7094	4.81969	8.2982	6.98808	10.2609	5.88087	8.8604	5.49942	6.79957	6.13869	12.2735	5.68793	6.88274	5.80824	7.22316	6.91711		46.6415	7.44392	57.4012	7.69174	31.5885	9.36915	32.7978	7.51735	46.1849	5.39248	51.4557	7.66421	52.408	10.4775	49.2024	8.03824	45.3634	11.3931	45.3795	6.19562		1.54071	1.63598	1.44374	1.61599	1.37696	1.74508	2.0277	1.60855
8.53439	5.34973	8.08974		10.7189	4.82801	8.34145	7.05406	10.3712	5.90139	8.63308	5.45784	6.80345	6.14201	12.2735	5.70845	6.74302	5.80769	7.21983	6.90491		46.1573	7.31771	57.1695	7.70092	31.6206	9.35079	32.7129	7.52423	45.8246	5.3856	51.4833	7.6665	52.408	10.5073	49.3768	8.0107	45.3588	11.3563	45.3795	6.19103		1.53858	1.64959	1.43991	1.59919	1.39802	1.74167	2.03961	1.6077
8.52774	5.34363	8.0731		10.7466	4.82856	8.44901	7.08843	10.4888	5.8964	8.54437	5.41071	6.80345	6.15255	12.2801	5.71732	6.62991	5.80547	7.1666	6.89937		45.586	7.15479	56.8781	7.70322	31.5357	9.35997	32.5018	7.52653	45.0192	5.37412	51.3594	7.65273	52.4241	10.5257	49.4938	8.00841	45.407	11.3127	45.5676	6.20021		1.54241	1.64981	1.43523	1.59324	1.41056	1.72849	2.0664	1.60898
8.51388	5.33642	8.0914		10.8076	4.81747	8.52164	7.07512	10.6008	5.8842	8.61146	5.40683	6.79347	6.16308	12.2951	5.72231	6.4841	5.80492	7.09397	6.89771		45.2234	6.95974	56.5706	7.70092	31.5586	9.38521	32.4903	7.52653	44.4799	5.37642	51.1919	7.6229	52.431	10.5486	49.4732	7.97399	45.4598	11.2623	46.2583	6.22315		1.53965	1.64704	1.43927	1.59366	1.41269	1.70744	2.07342	1.60323
8.43349	5.31979	8.0914		10.837	4.81082	8.5355	7.03853	10.705	5.89196	8.65138	5.4085	6.76852	6.16308	12.3023	5.72286	6.28506	5.82709	7.03576	6.87442		45.1064	6.83583	56.426	7.68486	31.4714	9.40357	32.1621	7.53341	44.3859	5.38101	51.1483	7.63208	52.3943	10.6083	49.5397	7.87302	45.5263	11.1774	46.9215	6.26446		1.52753	1.653	1.45076	1.59388	1.41142	1.69021	2.06917	1.60323
8.38359	5.31646	8.08364		10.8602	4.81803	8.48727	6.99917	10.7854	5.91747	8.66302	5.38022	6.7591	6.1714	12.3062	5.73118	6.18581	5.84761	7.00416	6.87885		45.1156	6.79223	56.3916	7.67339	31.1387	9.40128	31.7009	7.56324	44.3331	5.38101	50.8568	7.67798	52.3025	10.7069	49.6338	7.73305	45.6273	11.0787	45.1133	6.29888		1.52136	1.65172	1.44161	1.59622	1.41142	1.68617	2.07363	1.61387
8.37527	5.31646	8.08419		10.8957	4.81026	8.48893	6.95647	10.8054	5.9901	8.66191	5.35638	6.72306	6.19136	12.3062	5.75169	6.1847	5.84151	7.03909	6.85113		45.1156	6.76699	55.5976	7.6688	31.0791	9.40357	30.1818	7.57013	44.2941	5.3856	50.414	7.70781	52.213	10.7758	49.6774	7.58848	45.6755	11.0397	43.826	6.32412		1.51902	1.65214	1.44034	1.596	1.43204	1.68574	2.09533	1.61238
8.36474	5.31868	8.08586		10.9063	4.79807	8.52663	6.93097	10.7616	6.04055	8.64694	5.32755	6.59665	6.21575	12.3129	5.77941	6.21742	5.82654	7.10229	6.78904		45.1156	6.74863	55.2649	7.65503	31.0745	9.40128	28.4149	7.55636	44.161	5.39248	50.3359	7.71699	52.1855	10.785	49.5374	7.50817	45.6755	11.0098	44.2482	6.35395		1.51222	1.6564	1.44459	1.59855	1.44183	1.68574	2.15211	1.62301
8.34644	5.33199	8.10692		10.9173	4.79917	8.53273	6.96257	10.7089	6.04055	8.63364	5.30648	6.5035	6.22351	12.36	5.82044	6.27341	5.82155	7.10562	6.79458		45.0375	6.77388	55.2993	7.63667	31.0882	9.39669	28.3346	7.54947	43.2202	5.40166	50.1914	7.71928	52.1373	10.7643	49.5489	7.4967	45.6961	10.9502	45.2142	6.38608		1.50605	1.67362	1.43545	1.60068	1.43693	1.68617	2.19208	1.64449
8.34644	5.34418	8.11746		10.9578	4.7964	8.56489	7.08399	10.7205	6.0594	8.66524	5.30426	6.5096	6.21575	12.3938	5.83541	6.31056	5.8587	7.10007	6.81232		44.8196	6.81059	55.2052	7.63438	31.0974	9.39669	28.2681	7.538	42.3252	5.41313	50.1363	7.73534	51.9101	10.7505	48.9821	7.50129	45.6709	10.9181	45.6204	6.40214		1.51051	1.67639	1.43459	1.59962	1.42545	1.68638	2.21569	1.6362
8.30264	5.34917	8.10415		10.9983	4.7964	8.65359	7.22593	10.8874	6.08601	8.65138	5.30371	6.54342	6.23571	12.3822	5.83153	6.3283	5.95683	7.10562	6.83672		44.6888	6.83124	55.1158	7.63208	31.1249	9.40128	28.2337	7.48752	41.9558	5.42002	49.7325	7.76747	51.6646	10.7505	47.743	7.52882	45.6227	10.9456	45.8246	6.40443		1.5103	1.67277	1.43502	1.6111	1.4212	1.69	2.25333	1.6362
8.25052	5.36636	8.08419		11.041	4.78975	8.82547	7.26419	11.0676	6.16031	8.55934	5.2843	6.53566	6.3028	12.3389	5.83208	6.33773	6.03057	7.12558	6.92376		44.7071	6.80371	55.0148	7.6252	31.1318	9.40128	27.8803	7.4531	41.7998	5.4269	48.1537	7.76517	51.6875	10.7528	47.2198	7.65962	45.5906	11.003	45.9669	6.40214		1.51136	1.67277	1.42779	1.63279	1.4246	1.6985	2.29629	1.65066
8.23112	5.3647	8.07089		11.0726	4.78753	9.17088	7.19876	11.1086	6.27508	8.54215	5.24937	6.47855	6.32109	12.2874	5.82765	6.3405	6.04166	7.1472	7.06514		44.8104	6.75322	55.0561	7.62979	31.0836	9.40357	27.3548	7.43933	41.7378	5.4269	47.0569	7.7537	51.5361	10.7138	47.0867	7.87073	45.5584	11.003	45.9784	6.40902		1.50988	1.67213	1.4112	1.63067	1.4246	1.69021	2.3184	1.66831
8.31151	5.33365	8.08031		11.0826	4.78199	9.60389	7.17936	11.0864	6.33163	8.53495	5.23219	6.42145	6.30668	12.2657	5.83541	6.38042	6.04776	7.14554	7.18435		44.893	6.74175	55.0354	7.62749	30.8129	9.41045	27.2561	7.4072	41.7309	5.4269	46.2032	7.74682	51.1276	10.6679	46.9995	8.00152	45.2647	10.8882	45.9738	6.42279		1.50881	1.67575	1.39483	1.62726	1.43119	1.6934	2.33329	1.66405
8.4723	5.40961	8.08807		11.0853	4.76813	9.84729	7.26918	11.0576	6.34383	8.51554	5.23219	6.36545	6.30391	12.2535	5.80436	6.43254	6.07437	7.11782	7.2287		44.9366	6.73028	54.8129	7.6229	30.4572	9.41275	27.0932	7.35902	41.7355	5.44526	45.7305	7.72616	50.9004	10.6542	47.0064	8.10938	44.1977	10.8332	45.9646	6.43656		1.50286	1.68957	1.35357	1.63024	1.43055	1.69404	2.34966	1.66299
8.63641	5.43844	8.08364		11.0853	4.83799	9.9116	7.33571	11.0282	6.33052	8.48172	5.21555	6.33329	6.27508	12.228	5.80104	6.44252	6.08158	7.09176	7.2287		44.9251	6.64537	54.6201	7.63208	30.4893	9.41504	26.6756	7.33148	41.7378	5.46821	45.7741	7.70092	50.5562	10.645	47.0224	8.20116	42.853	10.9571	45.96	6.44574		1.50286	1.68681	1.30296	1.63109	1.43098	1.69361	2.35711	1.66278
8.78333	5.44121	8.07199		11.0859	4.91727	9.92214	7.3479	11.0138	6.33052	8.38525	5.2211	6.32997	6.2213	12.223	5.86535	6.44141	6.08102	7.09896	7.30799		44.8333	6.53064	54.5949	7.63667	30.1772	9.42193	26.3474	7.28559	41.7401	5.47968	45.7902	7.70781	50.2304	10.6473	47.0247	8.27	41.8089	11.1728	45.9646	6.45033		1.50286	1.68851	1.29211	1.63003	1.45544	1.68574	2.35583	1.66469
8.94578	5.44953	8.05647		11.0754	4.94277	9.93489	7.34624	11.0144	6.39206	8.29654	5.25492	6.32997	6.20854	12.2413	5.94962	6.44085	6.08601	7.10007	7.43107		44.8287	6.49163	54.6293	7.62979	29.5256	9.44258	26.0973	7.20986	41.7332	5.48886	45.7925	7.74452	50.4094	10.6771	47.1028	8.35261	41.0701	11.3495	45.9623	6.4182		1.50307	1.68298	1.2919	1.62918	1.46352	1.67788	2.35498	1.6698
9.15813	5.45174	8.04705		11.0587	4.95054	9.95152	7.31131	10.9844	6.48299	8.24609	5.29539	6.32886	6.21076	12.2718	5.96348	6.4342	6.07215	7.10894	7.50592		44.9113	6.5031	54.6063	7.62979	29.1676	9.45864	26.1226	7.1525	41.6896	5.50492	45.804	7.81336	50.3933	10.7138	47.1372	8.40309	40.7327	11.4435	45.9531	6.35395		1.50371	1.68702	1.29403	1.63279	1.46054	1.68192	2.35328	1.66916
9.38822	5.45673	8.0354		11.0515	4.95054	9.97259	7.29024	10.8891	6.52457	8.18843	5.36414	6.33662	6.20854	12.3367	5.96681	6.42089	6.03944	7.1289	7.59019		44.6933	6.51458	54.37	7.62749	29.0896	9.46094	25.8036	7.06759	41.5336	5.51181	45.8407	7.89826	50.6434	10.7391	47.1395	8.35949	40.735	11.4665	45.9279	6.331		1.49584	1.68723	1.29339	1.65385	1.46054	1.6817	2.34754	1.66767
9.50687	5.48889	7.98938		11.0698	4.94333	9.98479	7.30244	10.7261	6.51293	8.16015	5.39796	6.34493	6.20577	12.4254	5.95406	6.47578	6.0278	7.15053	7.65672		44.1748	6.5054	54.3126	7.61602	29.085	9.45176	25.4778	6.92991	40.6088	5.52557	45.8682	7.91892	50.7903	10.7505	47.1991	8.22181	40.3381	11.4321	45.8223	6.34477		1.49052	1.67107	1.29084	1.6564	1.47287	1.68745	2.3469	1.65704
9.54401	5.54932	7.87794		11.1386	4.88844	9.99754	7.2969	10.5348	6.49463	8.19508	5.3963	6.34604	6.20633	12.5008	5.93521	6.59055	6.03334	7.15053	7.65118		43.3877	6.45262	54.2277	7.58619	29.0712	9.44258	25.386	6.82206	38.2338	5.54393	45.8636	7.92121	50.7926	10.7276	47.3093	8.10708	39.1999	11.3953	45.7696	6.36772		1.49286	1.63577	1.27553	1.67065	1.49733	1.69021	2.35541	1.65363
9.55621	5.58647	7.73268		11.2206	4.79751	10.0025	7.28636	10.333	6.48022	8.22945	5.40961	6.37709	6.23793	12.5524	5.91414	6.65431	6.06495	7.16051	7.64785		42.2839	6.3769	53.654	7.54489	28.7981	9.42881	25.3653	6.70733	36.3866	5.53934	45.8223	7.93498	50.7651	10.6542	47.5181	8.12314	38.5597	11.3931	45.703	6.40443		1.50243	1.63258	1.26638	1.67065	1.48946	1.68745	2.3486	1.64981
9.55233	5.597	7.58188		11.2805	4.777	9.99033	7.28359	10.1528	6.4719	8.26826	5.42069	6.42145	6.27009	12.5696	5.93465	6.67427	6.0655	7.13001	7.64952		41.8732	6.33559	53.5026	7.51276	28.392	9.41963	25.184	6.56965	35.6592	5.47509	45.8246	7.93039	50.7605	10.5968	47.8072	8.19428	38.2499	11.3839	45.4254	6.4595		1.50903	1.63152	1.27191	1.66788	1.44948	1.68957	2.33457	1.64981
9.53625	5.57261	7.45546		11.3149	4.77811	9.95374	7.29302	10.0558	6.47634	8.31151	5.40961	6.44917	6.28894	12.5684	5.99398	6.68647	6.07825	6.99196	7.64175		41.8273	6.30576	53.5233	7.4967	28.213	9.41504	24.1147	6.50081	35.1659	5.40625	45.8476	7.92121	50.6824	10.5876	47.9862	8.23099	37.6235	11.3678	45.1156	6.51458		1.50541	1.60919	1.26851	1.68915	1.44395	1.70063	2.29905	1.65533
9.57617	5.5399	7.41		11.3548	4.77034	9.91549	7.32074	10.0186	6.48632	8.28767	5.42069	6.53899	6.30169	12.5563	5.98843	6.67926	6.08823	6.87553	7.61348		41.4946	6.26446	53.5301	7.47375	27.8849	9.39669	23.3208	6.4595	35.1177	5.38101	45.8774	7.91892	50.2648	10.5945	48.1514	8.25394	37.0888	11.3724	45.0261	6.55588		1.50945	1.58707	1.26192	1.69935	1.45331	1.70531	2.23058	1.64832
9.83509	5.53934	7.41111		11.4036	4.76369	9.9177	7.31686	9.99255	6.49574	8.26494	5.53657	6.72916	6.27674	12.5446	5.97236	6.67316	6.07825	6.81953	7.60461		41.4647	6.20939	53.5278	7.44621	27.3319	9.35079	23.2106	6.39296	34.3558	5.35118	45.8774	7.92121	49.6269	10.6083	48.3052	8.26541	37.0085	11.3724	45.0605	6.5926		1.51158	1.58154	1.26383	1.67192	1.45012	1.70382	2.19506	1.62663
10.1733	5.546	7.38339		11.4463	4.7465	9.9116	7.31519	9.97315	6.49685	8.23943	5.55431	6.93762	6.21021	12.5385	6.0716	6.67704	6.04942	6.77961	7.61348		41.4579	6.13825	53.6059	7.44621	27.2332	9.31867	23.2014	6.35624	31.935	5.26398	45.859	7.92351	49.324	10.6129	48.3281	8.26771	36.9167	11.3517	45.1362	6.6339		1.51009	1.57559	1.28254	1.66639	1.44608	1.70531	2.19549	1.61854
10.354	5.55653	7.31408		11.4723	4.72544	9.91549	7.30909	9.96927	6.49962	8.21448	5.5898	7.09453	6.1409	12.5341	6.18526	6.69922	6.09766	6.73803	7.60073		41.49	6.03728	53.7757	7.44851	27.3663	9.32326	22.8779	6.36083	29.8698	5.15154	45.524	7.91662	49.3401	10.5899	48.312	8.27	36.7262	11.2852	44.8677	6.6752		1.50754	1.57048	1.28467	1.66363	1.45863	1.71126	2.19527	1.61046
10.4405	5.56596	7.26585		11.4529	4.71047	9.9238	7.21207	9.96871	6.53012	8.20118	5.66409	7.20652	6.10431	12.523	6.17971	6.69811	6.19468	6.71862	7.54695		41.5611	5.95927	53.9478	7.43704	27.2538	9.36227	22.3226	6.3333	28.7132	4.98174	44.9779	7.90744	49.2506	10.5096	48.2226	8.27459	36.6184	11.1934	44.652	6.7188		1.51009	1.5556	1.29892	1.64215	1.4633	1.71126	2.19421	1.61046
10.5353	5.58592	7.25365		11.3903	4.70603	9.92713	7.09009	9.96871	6.53899	8.19619	5.73728	7.27028	6.10431	12.5041	6.17694	6.69146	6.25345	6.71973	7.51867		41.5703	5.91108	53.9042	7.41409	26.9188	9.40128	22.1482	6.2461	28.2818	4.74538	44.4501	7.90515	49.1611	10.3673	48.1078	8.27918	36.5335	11.1039	44.6979	6.7624		1.51115	1.49924	1.30891	1.64215	1.46139	1.70765	2.18124	1.60515
10.6085	5.5959	7.23258		11.4707	4.73098	9.9482	7.01247	9.96982	6.55839	8.24886	5.81878	7.27583	6.10098	12.4631	6.17639	6.69256	6.25733	6.7214	7.54584		41.5588	5.85601	53.7183	7.4095	26.8844	9.45635	22.0335	6.20021	28.236	4.60541	44.0417	7.91433	48.9729	10.2778	48.2501	8.29754	36.4279	11.0511	44.7438	6.79453		1.51349	1.47798	1.30019	1.64598	1.46394	1.69638	2.1621	1.59622
10.6856	5.59479	7.17659		11.744	4.75482	9.96317	6.97255	9.96982	6.61106	8.38747	5.84317	7.25975	6.091	12.3982	6.17861	6.67981	6.26731	6.71585	7.56192		41.5152	5.76881	53.5324	7.4095	26.811	9.54813	21.2992	6.21397	28.236	4.56181	44.0669	7.96252	48.9316	10.2801	48.3763	8.33655	36.4233	11.0489	44.7599	6.806		1.50945	1.47755	1.30019	1.64385	1.46352	1.68617	2.15615	1.59622
10.7998	5.59479	7.09896		12.1853	4.74484	9.95707	6.97588	9.97536	6.62991	8.48283	5.82931	7.20597	6.07437	12.3716	6.16696	6.65985	6.27009	6.67205	7.57245		41.4028	5.67473	53.4888	7.4095	26.8064	9.61927	20.9182	6.23692	28.2291	4.57558	43.055	8.03824	48.8559	10.3008	48.374	8.35949	36.3981	11.0879	44.7691	6.78994		1.50966	1.47862	1.29998	1.64747	1.44438	1.69298	2.14764	1.5758
10.9096	5.59645	7.0352		12.7059	4.74373	9.93156	6.93097	9.99477	6.63601	8.53495	5.79383	7.14554	6.05608	12.391	6.15754	6.65985	6.27508	6.65265	7.57633		41.3753	5.599	53.4888	7.4095	26.7834	9.66287	20.8907	6.23692	28.2428	4.59164	42.674	8.15068	48.8352	10.3123	48.4497	8.36867	36.4646	11.1911	44.7737	6.7647		1.50945	1.48818	1.30338	1.65852	1.42417	1.70106	2.13956	1.53582
11.0255	5.59312	7.00416		13.0602	4.76757	9.88776	6.82008	10.0347	6.63878	8.56655	5.7406	7.13001	6.05164	12.4043	6.15366	6.66263	6.27896	6.71751	7.5791		41.3753	5.59441	53.4154	7.4072	26.7834	9.7363	20.8884	6.23922	28.2681	4.59164	42.9517	8.29983	48.7802	10.3214	48.0642	8.38703	36.5863	11.3586	44.776	6.76011		1.5086	1.49478	1.31061	1.66129	1.43162	1.70318	2.12531	1.51583
11.1491	5.58037	6.99917		13.2327	4.77367	9.86171	6.73969	10.0236	6.63989	8.58263	5.79383	7.15053	6.05441	12.4054	6.12538	6.66872	6.25623	6.66429	7.58021		41.3821	5.62424	53.1171	7.40032	26.8155	9.81661	20.8815	6.24381	28.2887	4.61459	42.9861	8.43063	48.8215	10.3398	47.704	8.42145	36.6207	11.5078	44.7966	6.78305		1.51498	1.49924	1.31168	1.66256	1.42736	1.7051	2.0747	1.5137
11.23	5.54156	7.00138		13.2864	4.78032	9.87557	6.7031	9.98923	6.61328	8.59205	5.91303	7.15552	6.05386	12.4066	6.12649	6.68092	6.23848	6.56615	7.57023		41.3936	5.64031	52.3094	7.39114	26.7582	9.85333	20.8632	6.2048	28.2933	4.62836	42.7773	8.52242	48.7343	10.3444	47.6971	8.43981	36.6505	11.6179	44.7599	6.79453		1.5186	1.4952	1.31572	1.6632	1.42417	1.72168	2.03259	1.5018
11.2533	5.51107	7.00416		13.2498	4.77312	9.88555	6.78737	9.97758	6.60219	8.58873	6.00063	7.14221	6.04665	12.4049	6.12372	6.68314	6.22462	6.55063	7.55526		41.389	5.63801	50.3773	7.37967	26.4874	9.89234	20.8632	6.10613	28.2841	4.56411	42.6534	8.58667	48.6884	10.3237	47.6902	8.44669	36.6781	11.7556	44.6268	6.79453		1.51817	1.49775	1.31933	1.66831	1.41928	1.73848	2.01558	1.48967
11.2528	5.51661	7.00915		13.1972	4.76979	9.86281	6.88329	9.98368	6.65154	8.59704	6.10875	7.15607	6.04942	12.4043	6.13259	6.68258	6.19967	6.55673	7.55138		41.3592	5.62424	49.3355	7.35213	26.3474	9.96347	20.4868	6.03728	28.2589	4.4815	42.6029	8.60273	48.6815	10.3237	47.7957	8.43522	36.6413	11.9988	44.6176	6.79223		1.5203	1.50435	1.31933	1.66682	1.42035	1.75294	2.00814	1.50222
11.2578	5.53823	7.01081		13.1584	4.74041	9.82733	6.94151	9.98701	6.65043	8.61977	6.23627	7.1727	6.05608	12.3977	6.14423	6.68258	6.18914	6.56671	7.54916		41.2766	5.62195	49.3515	7.31542	26.336	10.0231	19.8306	6.01434	28.2337	4.42183	42.5203	8.57978	48.8329	10.3352	47.8715	8.42833	36.6299	12.3178	44.5511	6.78764		1.51498	1.49797	1.33209	1.66448	1.42035	1.75018	1.99112	1.51774
11.2694	5.54711	7.01414		13.1561	4.72433	9.85561	6.97754	10.0025	6.61827	8.63474	6.32331	7.14942	6.06883	12.3788	6.16419	6.6848	6.19524	6.56671	7.53031		41.155	5.63572	48.0963	7.29018	26.2992	10.0828	19.6722	6.01434	28.2314	4.40348	42.557	8.55913	49.0463	10.3444	47.8072	8.43751	36.6345	12.5358	43.9613	6.80141		1.51158	1.48925	1.3557	1.66639	1.42013	1.74976	1.97241	1.5186
11.2727	5.54655	7.02578		13.1556	4.71213	9.93434	6.98198	10.0402	6.60774	8.65027	6.34161	7.1289	6.11041	12.3788	6.11263	6.69035	6.19746	6.54786	7.54085		41.0448	5.64949	47.5273	7.25346	26.2098	10.1677	19.6217	6.02122	28.2612	4.40348	42.5524	8.55454	49.0716	10.3467	47.8187	8.46964	36.6436	12.6551	42.3252	6.79912		1.50647	1.48457	1.3557	1.67618	1.4229	1.75188	1.95433	1.52285
11.2788	5.54544	7.04019		13.1645	4.70603	10.0086	6.97034	10.0447	6.60829	8.66524	6.28062	7.12447	6.16752	12.3844	5.93964	6.69645	6.19468	6.51903	7.57134		41.015	5.66096	47.2037	7.19609	26.1616	10.1608	19.5965	6.01893	28.3163	4.38053	42.5387	8.55454	49.106	10.3765	47.72	8.488	36.6528	12.7676	40.5033	6.78535		1.50009	1.48946	1.35059	1.67681	1.42247	1.76826	1.95114	1.52838
11.2938	5.55431	7.05406		13.1844	4.74151	10.0153	6.97144	10.033	6.60718	8.66524	6.20411	7.12447	6.20577	12.3461	5.71953	6.69645	6.1847	6.5096	7.57522		40.9874	5.64719	46.5107	7.14791	26.0996	10.0943	19.468	6.02122	28.3553	4.34611	42.5318	8.55225	49.1335	10.4614	47.7935	8.488	36.6597	12.8341	40.1476	6.77617		1.49499	1.48542	1.37739	1.67681	1.42332	1.74805	1.95114	1.52965
11.2811	5.55154	7.08566		13.1722	4.76425	10.0047	6.98142	10.0269	6.61772	8.65859	6.27175	7.12447	6.22351	12.2735	5.5033	6.71086	6.15255	6.50517	7.57467		40.6341	5.60589	46.0105	7.1089	25.9895	10.108	19.0343	6.02352	28.2199	4.34152	42.5364	8.55913	49.1152	10.544	47.9082	8.488	36.6758	12.8295	39.7782	6.76011		1.49308	1.48457	1.42545	1.67192	1.42205	1.7421	1.95008	1.52965
11.2395	5.5022	7.13777		13.1212	4.71712	10.012	7.00693	10.0352	6.6094	8.65138	6.42034	7.12447	6.2213	12.1837	5.36969	6.69589	6.08601	6.46913	7.54806		40.1751	5.55311	45.8751	7.02399	25.9459	10.1746	18.9861	6.02352	27.1873	4.35529	42.5387	8.56601	49.0073	10.6197	47.9747	8.4857	36.6735	12.8272	38.4358	6.74404		1.49137	1.48818	1.42205	1.68255	1.42247	1.73742	1.95114	1.53178
11.1829	5.47226	7.17049		13.0081	4.67775	10.0158	7.02855	10.0591	6.60829	8.65859	6.49685	7.13888	6.21686	12.0855	5.35583	6.62437	5.9657	6.43531	7.49871		39.9181	5.50033	45.8407	6.89549	25.9344	10.2297	18.8347	5.99369	25.5787	4.39659	42.5364	8.5706	48.8972	10.7069	47.9908	8.47652	36.6666	12.8433	37.8988	6.74175		1.49265	1.4969	1.42609	1.6917	1.4229	1.71424	1.94434	1.53178
11.1347	5.46283	7.18213		12.8811	4.72045	10.0275	7.028	10.0951	6.60663	8.70682	6.53677	7.14443	6.21686	11.9902	5.36248	6.58778	5.83597	6.42311	7.47321		39.8493	5.47738	45.8407	6.77388	25.9344	10.2985	18.4698	5.94091	24.631	4.4792	42.5387	8.54995	48.7618	10.8056	47.9449	8.46046	36.6735	12.8525	37.7061	6.74175		1.49648	1.50711	1.42843	1.69553	1.42949	1.69872	1.92754	1.52625
11.1219	5.45673	7.19211		12.7974	4.76646	10.0519	7.01303	10.1228	6.6033	8.73842	6.57225	7.10395	6.22795	11.9015	5.32367	6.585	5.78995	6.4026	7.46933		39.8493	5.43149	45.8407	6.67061	25.9092	10.3627	18.3115	5.86518	24.0229	4.55034	42.5455	8.53159	48.6654	10.8813	47.9426	8.44669	36.6804	12.8364	37.2953	6.74175		1.49648	1.50796	1.428	1.70106	1.43864	1.68957	1.92392	1.52625
11.1214	5.45729	7.20652		12.7298	4.76425	10.0807	6.97699	10.1339	6.59942	8.75173	6.60164	7.08621	6.23571	11.8183	5.25603	6.58722	5.79327	6.39317	7.46711		39.847	5.33511	45.859	6.57883	25.916	10.3123	18.2082	5.80323	23.8875	4.58476	42.5593	8.54995	48.475	10.8469	47.9954	8.42604	36.6987	12.7653	37.254	6.74634		1.47521	1.51136	1.41801	1.69404	1.43438	1.68383	1.93307	1.52646
11.1014	5.46228	7.22759		12.6788	4.71823	10.1395	6.94705	10.0674	6.6033	8.7606	6.61993	7.08289	6.23183	11.7745	5.19338	6.58833	5.78884	6.39262	7.4344		39.8309	5.30987	45.9462	6.53064	25.8724	10.2021	17.8319	5.78258	23.4011	4.59394	42.5708	8.54536	47.7843	10.7069	47.9977	8.40309	36.7079	12.7171	36.9465	6.73945		1.42864	1.50988	1.41375	1.68	1.4246	1.67703	1.93477	1.52625
11.0754	5.46948	7.25365		12.6877	4.665	10.2664	6.94095	9.98701	6.61882	8.70128	6.60663	7.08399	6.23128	11.769	5.18284	6.59776	5.76999	6.37432	7.41998		39.8332	5.30758	46.0679	6.51687	25.8724	10.1906	17.5497	5.78028	21.9876	4.57558	42.5708	8.54077	47.4883	10.5991	47.9747	8.38933	36.6299	12.7676	36.4922	6.69127		1.40376	1.51051	1.41375	1.68766	1.4246	1.67235	1.93562	1.52008
11.0654	5.47281	7.26807		12.7154	4.61067	10.3879	6.93873	9.96538	6.64987	8.55047	6.57724	7.08898	6.23128	11.7756	5.18894	6.61827	5.74393	6.33218	7.46434		39.8355	5.29381	46.2927	6.52146	25.877	10.271	17.5497	5.77799	21.7076	4.5664	42.5845	8.57978	47.4745	10.5853	47.8646	8.38474	36.6161	12.8525	36.4394	6.5903		1.40185	1.50817	1.41801	1.69574	1.42247	1.67469	1.93647	1.51243
11.072	5.47946	7.26807		12.7558	4.56243	10.4583	6.93707	9.96039	6.66928	8.45566	6.58778	7.07013	6.23959	11.7922	5.17009	6.63047	5.7212	6.24514	7.52311		39.8263	5.28693	46.6117	6.57424	25.8747	10.3582	17.4877	5.76422	21.6365	4.58476	42.5662	8.63256	47.2749	10.5693	47.3437	8.38474	36.5404	12.9167	36.4279	6.49163		1.4044	1.50371	1.43141	1.69191	1.42162	1.67065	1.93689	1.53369
11.0548	5.49554	7.25809		12.8185	4.55467	10.4599	6.93929	9.97315	6.69645	8.43792	6.57613	7.0596	6.28395	11.8216	5.17896	6.64599	5.70567	6.13813	7.5913		39.7713	5.28693	46.2377	6.6775	25.8311	10.4499	17.4969	5.72291	21.2579	4.60082	42.4354	8.67157	47.1991	10.466	46.7333	8.38244	36.1204	12.9672	36.4073	6.43426		1.38824	1.50201	1.43864	1.69	1.42226	1.66448	1.93945	1.57686
11.0077	5.50053	7.25809		12.8617	4.56077	10.4123	6.96146	10.0347	6.78183	8.43737	6.51847	7.06293	6.315	11.8455	5.20668	6.6654	5.70512	6.08823	7.66837		39.6474	5.29611	45.9508	6.74863	25.822	10.5601	17.5175	5.66784	21.1523	4.58935	42.2656	8.69911	47.0592	10.2985	46.5773	8.38244	35.5147	13.0062	36.4073	6.40443		1.36739	1.4784	1.45118	1.70701	1.42354	1.66618	1.93881	1.58728
10.965	5.49111	7.28026		12.8712	4.57629	10.3834	6.97921	10.1445	6.89382	8.43792	6.51681	7.06071	6.3222	11.8427	5.21389	6.67039	5.71122	6.08047	7.70884		39.567	5.37412	45.7558	6.74634	25.7784	10.7092	17.5267	5.62195	21.1913	4.57787	42.2174	8.68534	46.9284	10.1792	46.3845	8.34802	35.0374	13.0337	36.4165	6.41591		1.34996	1.46692	1.47968	1.70722	1.42311	1.66703	1.942	1.59834
10.9107	5.48335	7.29191		12.8778	4.54857	10.3579	6.98198	10.2587	6.94816	8.40965	6.5279	7.06847	6.34327	11.8372	5.21445	6.67039	5.69514	6.08102	7.71827		39.5716	5.45673	45.7237	6.73257	25.7072	10.8974	17.5405	5.60359	21.2487	4.57558	42.222	8.64174	47.0041	10.1425	45.9807	8.32278	34.8859	13.0544	36.4394	6.48934		1.34124	1.47925	1.50775	1.70318	1.42226	1.66575	1.9403	1.64002
10.8619	5.49277	7.28692		12.8961	4.47705	10.3491	6.98697	10.3224	6.94927	8.37305	6.52014	7.13556	6.35824	11.836	5.21167	6.66983	5.70623	6.0777	7.70773		39.7346	5.40625	46.4144	6.7211	25.6728	11.042	17.4785	5.60818	21.2992	4.56181	42.2059	8.6142	47.2106	10.1447	45.9692	8.34343	34.8882	13.0728	36.4715	6.60407		1.34379	1.47925	1.53008	1.69829	1.41694	1.6547	1.93796	1.65597
10.8597	5.51495	7.27971		12.9122	4.3706	10.3213	7.01746	10.338	6.93485	8.3847	6.51681	7.18379	6.36268	11.836	5.21056	6.66484	5.73062	6.07604	7.72437		39.886	5.33053	46.5658	6.69815	25.6154	11.1383	17.1183	5.60589	21.3221	4.57558	42.1761	8.60961	47.7636	10.0621	45.9646	8.35032	34.8767	13.1072	36.4922	6.74863		1.35357	1.48861	1.53008	1.68872	1.41269	1.64619	1.94498	1.65533
10.863	5.52604	7.2786		12.9144	4.26747	10.2803	7.04574	10.3363	6.94982	8.40355	6.51625	7.17548	6.39539	11.8488	5.20779	6.64821	5.72951	6.07271	7.77094		39.8516	5.32135	46.0541	6.66144	25.6567	11.237	16.7305	5.63113	21.3382	4.5664	42.0591	8.61191	48.1767	9.79366	45.9715	8.34573	34.8194	13.1439	36.4991	6.8932		1.38313	1.4884	1.52987	1.68383	1.41078	1.65151	1.95369	1.65938
10.8608	5.52715	7.2786		12.915	4.24751	10.2232	7.0535	10.3413	7.05516	8.43016	6.52069	7.1971	6.36545	11.8771	5.19338	6.63213	5.73395	6.06938	7.80199		40.4849	5.32135	45.6869	6.6775	25.7531	11.3495	16.3495	5.70915	21.3382	4.54116	42.0063	8.6142	48.1216	9.45405	46.0174	8.34802	34.5004	13.1668	36.506	7.0217		1.41205	1.48521	1.53008	1.67362	1.40589	1.6547	1.95582	1.66746
10.8591	5.53602	7.28026		12.9089	4.2392	10.1611	7.0535	10.3596	7.22926	8.4978	6.5401	7.26474	6.315	11.8798	5.19892	6.63213	5.7783	6.07382	7.81973		41.4211	5.25021	45.5217	6.73257	25.7485	11.4871	15.964	5.8147	21.329	4.5228	42.0476	8.58896	48.413	9.19934	45.7053	8.34343	34.1562	13.176	36.522	7.13873		1.41354	1.48436	1.53944	1.64725	1.41673	1.65448	1.9554	1.68851
10.8602	5.56097	7.28359		12.88	4.22645	10.1167	7.05461	10.3579	7.30466	8.61479	6.50461	7.30521	6.27785	11.8638	5.21888	6.62492	5.83874	6.06716	7.83581		41.9237	5.24103	45.4162	6.77846	25.3515	11.6615	15.8103	5.92026	21.2946	4.51592	42.0797	8.53618	48.4474	9.10756	45.4001	8.34802	34.131	13.1852	36.5473	7.23969		1.40908	1.48414	1.54454	1.64874	1.41588	1.66384	1.95476	1.72126
10.858	5.60532	7.28137		12.8501	4.24363	10.0968	7.05738	10.3568	7.30632	8.7168	6.47356	7.30521	6.24846	11.8582	5.22443	6.56006	5.8343	6.06772	7.85854		41.3821	5.22268	45.2923	6.82436	24.9982	11.8222	15.8034	6.03728	21.29	4.50903	42.0017	8.50406	48.4497	9.12821	45.2578	8.36867	34.0988	13.1875	36.5977	7.3246		1.40908	1.49201	1.54688	1.67405	1.41482	1.6715	1.96901	1.73125
10.8586	5.66631	7.27805		12.8318	4.227	10.1007	7.05794	10.3568	7.3102	8.75173	6.47744	7.3041	6.23904	11.892	5.23385	6.46026	5.80048	6.07049	7.88072		40.3335	5.23874	45.2211	6.86796	24.9615	11.9346	15.7713	6.12678	21.3198	4.51821	41.8938	8.49259	48.4612	9.1305	44.9412	8.41916	33.9726	13.1806	36.6413	7.4095		1.41822	1.51307	1.55113	1.67128	1.41971	1.64087	1.97624	1.73147
10.8386	5.71454	7.27361		12.8174	4.18431	10.1994	7.05738	10.3807	7.31519	8.7545	6.44917	7.30022	6.26565	11.9419	5.21445	6.45638	5.80603	6.08546	7.8785		39.8791	5.30528	45.2165	6.90697	24.7894	12.0195	15.6061	6.20021	21.3749	4.52739	41.8503	8.46505	48.4268	9.11674	44.3354	8.46275	33.7959	13.1508	36.6459	7.4944		1.41354	1.50775	1.55624	1.6698	1.43545	1.61918	1.97709	1.73083
10.7882	5.70623	7.25476		12.8324	4.14439	10.4899	7.06182	10.506	7.31408	8.78056	6.48022	7.30133	6.30834	11.9902	5.21167	6.58445	5.8526	6.08546	7.86408		39.2527	5.30069	45.2326	6.94598	24.1514	12.0929	15.3238	6.29429	20.971	4.53198	41.5428	8.41916	48.2845	9.10297	43.7801	8.46046	33.7225	13.1232	36.5174	7.56095		1.39632	1.50137	1.57644	1.67001	1.43949	1.6279	1.9773	1.72168
10.715	5.64413	7.2603		12.8418	4.13718	10.7893	7.08067	10.7305	7.31242	8.94024	6.49519	7.29801	6.32276	12.0334	5.21666	6.78017	5.92079	6.12039	7.88238		38.6285	5.27316	45.2188	6.98269	24.195	12.148	14.9819	6.39984	19.6722	4.54575	41.3454	8.39621	48.0436	9.09838	43.3693	8.45817	33.7156	13.1049	36.2076	7.6252		1.39632	1.50775	1.60196	1.66873	1.42694	1.62875	1.97709	1.70744
10.6174	5.52936	7.34901		12.8434	4.14106	10.9545	7.12003	10.893	7.30133	9.08605	6.49519	7.30022	6.30834	12.0517	5.21833	6.89715	5.93521	6.17694	7.90733		38.6285	5.29611	45.2051	7.00334	23.9931	12.1962	14.7547	6.47557	18.9402	4.6077	39.9617	8.37326	48.0711	9.08691	42.8829	8.46275	33.7294	13.0796	35.9598	7.67798		1.39887	1.51668	1.61621	1.6649	1.42354	1.62492	1.97687	1.69829
10.547	5.45451	7.49206		12.8346	4.14106	11.0471	7.18102	10.9767	7.28082	9.17033	6.51903	7.31187	6.31167	12.014	5.22498	6.92487	5.93521	6.24957	7.90899		37.9287	5.32364	45.2051	6.99646	23.8692	12.2398	14.702	6.53752	18.775	4.66737	35.2393	8.34343	47.6328	9.06855	42.3551	8.46275	33.7156	13.0521	35.9162	7.69633		1.39887	1.52859	1.62726	1.66256	1.44842	1.61535	1.98177	1.70063
10.5209	5.44287	7.61403		12.813	4.13607	11.0909	7.25032	11.0327	7.2725	9.27179	6.55839	7.31907	6.31721	11.9525	5.2588	6.91489	5.93632	6.31278	7.87739		37.2219	5.33741	45.1775	6.99187	23.8531	12.288	14.7066	6.61325	18.7635	4.69031	32.9309	8.32737	46.809	9.06396	42.199	8.46275	33.6238	13.0406	35.9116	7.71469		1.40716	1.54752	1.63449	1.64747	1.46054	1.61131	1.99091	1.69978
10.5165	5.44731	7.66726		12.8362	4.13607	11.0959	7.28082	11.0221	7.27361	9.41539	6.55839	7.3285	6.31943	11.8959	5.27155	6.88828	5.93077	6.33884	7.82694		36.9396	5.36265	44.9504	6.99416	23.8508	12.3499	14.6813	6.70733	18.635	4.70408	32.9653	8.32507	45.9485	9.06396	42.199	8.45587	33.6124	13.036	35.8015	7.74223		1.40291	1.55921	1.63577	1.64576	1.4414	1.61216	1.98304	1.70042
10.532	5.41293	7.66892		12.8701	4.13607	11.0925	7.28137	10.9944	7.25421	9.50354	6.56227	7.34014	6.32054	11.8322	5.23052	6.86167	5.92966	6.35381	7.81917		36.8341	5.36724	44.6566	6.99416	23.8095	12.3752	14.6561	6.80371	18.1325	4.72703	32.9538	8.34802	44.6727	9.06625	42.2059	8.45358	33.5734	12.9856	35.3999	7.756		1.39823	1.55028	1.63534	1.64236	1.44034	1.61387	1.99325	1.68915
10.5387	5.35139	7.66061		12.8806	4.14716	11.0792	7.32129	10.9778	7.21096	9.5174	6.56394	7.33959	6.27674	11.805	5.2089	6.85501	5.95018	6.37155	7.82084		36.7744	5.35347	44.675	6.99646	23.8256	12.3591	14.6561	6.88631	17.9581	4.7385	32.8184	8.37556	44.4501	9.07773	41.6644	8.46964	33.4701	12.8869	35.019	7.76288		1.39802	1.54943	1.63322	1.64194	1.44076	1.62344	2.00154	1.68596
10.5281	5.45507	7.65118		12.8834	4.12831	11.0815	7.3285	10.9761	7.22427	9.53348	6.56726	7.3407	6.20854	11.8421	5.19393	6.87165	5.99841	6.37876	7.82195		36.8731	5.342	44.5763	6.99646	23.8049	12.3316	14.6974	6.94598	17.9673	4.74309	32.6096	8.36408	43.9522	9.08461	40.2371	8.49259	33.3049	12.8089	35.0006	7.78583		1.39015	1.54411	1.63726	1.64215	1.43821	1.63641	2.00218	1.68553
10.5237	5.59201	7.6157		12.8878	4.07342	11.1691	7.2847	10.9778	7.2287	9.53792	6.56893	7.34402	6.16364	11.8943	5.20447	6.92155	5.99564	6.3782	7.82305		36.9121	5.342	44.5763	6.99875	23.8164	12.2926	14.7089	6.96663	17.9466	4.74309	31.2121	8.25623	42.635	9.08461	40.0879	8.50865	33.1259	12.763	35.0006	7.85467		1.39504	1.52306	1.64343	1.64449	1.43226	1.64853	2.00814	1.68532
10.5276	5.59368	7.57467		12.8906	4.05623	11.2971	7.26474	10.9573	7.22039	9.51518	6.56893	7.35788	6.15587	11.9253	5.20447	7.00748	5.98344	6.37487	7.79755		36.9282	5.41084	44.5717	7.01252	23.8141	12.249	14.6928	6.94598	17.8388	4.74997	29.4567	8.12544	42.0682	9.08461	39.8149	8.53159	33.1557	12.7308	35.058	7.91662		1.39568	1.53858	1.64024	1.65108	1.43183	1.63641	2.00452	1.69255
10.5509	5.59867	7.56524		12.8662	4.05513	11.3925	7.29246	10.9678	7.25088	9.4603	6.57114	7.3906	6.15421	11.9536	5.19338	7.13445	5.90416	6.38042	7.75929		36.5977	5.46821	44.3606	7.01252	23.7981	12.2329	14.5689	6.93909	17.6254	4.75915	27.7587	8.08413	41.5496	9.03183	39.6841	8.53618	32.9033	12.7148	35.1108	7.9281		1.39632	1.54305	1.64279	1.65363	1.43502	1.63152	2.00792	1.69298
10.5509	5.58536	7.56081		12.8218	4.05346	11.4435	7.3163	10.9844	7.27749	9.38212	6.64932	7.42885	6.1653	11.9868	5.18451	7.22427	5.89196	6.39372	7.72658		35.9919	5.48197	44.1564	6.97122	23.782	12.226	14.4427	6.9345	17.529	4.77751	26.5172	8.12085	41.2858	8.83908	39.7093	8.53618	32.1943	12.7079	35.1498	7.89368		1.39738	1.55092	1.64917	1.65002	1.41865	1.62982	2.0243	1.6951
10.5209	5.58536	7.54473		12.7753	4.05457	11.4712	7.31797	10.9878	7.2847	9.3239	6.69423	7.4344	6.13924	11.948	5.17286	7.24201	5.96404	6.41036	7.71549		35.3655	5.49115	44.122	6.89549	23.782	12.2123	14.3761	6.91156	17.5313	4.81193	25.8908	8.19887	41.3271	8.54307	39.8195	8.53848	31.6848	12.7056	35.198	7.8409		1.39802	1.55198	1.64917	1.64215	1.41375	1.6313	2.04152	1.69319
10.496	5.58758	7.54085		12.7509	4.05457	11.4746	7.32018	10.9833	7.27971	9.3239	6.69312	7.4161	6.13259	11.8039	5.16344	7.22704	6.03501	6.43531	7.72547		35.0305	5.48197	44.1128	6.81977	23.7682	12.1962	13.9837	6.88172	17.5382	4.83029	25.6338	8.26541	41.1573	8.17363	39.8699	8.53848	31.5701	12.7056	35.12	7.83172		1.40099	1.55177	1.64704	1.63109	1.41333	1.62982	2.04259	1.68915
10.4993	5.5898	7.53641		12.7509	4.08007	11.4524	7.33404	10.9767	7.17492	9.32668	6.71641	7.40612	6.12704	11.6276	5.17397	7.20375	6.07271	6.47467	7.7604		35.0305	5.44755	44.1105	6.77158	23.7476	12.1985	13.9447	6.87714	17.5428	4.80963	25.6154	8.28836	41.0012	7.87761	39.8883	8.54077	31.6619	12.6827	34.8584	7.8409		1.40099	1.56176	1.64981	1.62067	1.41375	1.64428	2.04259	1.69893
10.4555	5.59257	7.54916		12.7558	4.07897	11.4729	7.33294	11.0055	7.0912	9.3483	6.74912	7.38561	6.12649	11.4906	5.23108	7.17659	6.07104	6.52734	7.78535		34.5945	5.42461	44.1128	6.72569	23.6902	12.2054	13.8667	6.8909	17.5474	4.80963	25.5948	8.16674	40.9117	7.83631	39.9411	8.54077	31.7881	12.6276	34.8217	7.85237		1.39483	1.5624	1.65002	1.61706	1.41461	1.65257	2.03557	1.70786
10.3773	5.57205	7.5719		12.7675	4.07675	11.5821	7.32795	11.0815	7.06847	9.34608	6.76575	7.30632	6.1093	11.4036	5.25381	7.13389	6.05718	6.5595	7.77316		33.3187	5.42461	44.0623	6.68209	23.6489	12.2168	13.5707	6.95745	17.5359	4.82799	25.5787	8.00152	40.9232	7.87302	39.9204	8.53848	31.9028	12.5863	34.7414	7.84549		1.39568	1.56666	1.65555	1.62131	1.41014	1.64747	2.02961	1.70807
10.333	5.56318	7.52089		12.7741	4.09172	11.8516	7.32905	11.1569	7.05627	9.36105	6.76409	7.17936	6.08879	11.3637	5.24161	7.0657	6.05552	6.56283	7.78092		32.3297	5.43149	43.9109	6.65914	23.6673	12.2352	12.9626	7.04924	17.5107	4.84176	25.5489	7.9671	40.6042	7.89368	39.5762	8.51783	31.9487	12.545	34.505	7.74682		1.39568	1.56559	1.6547	1.65682	1.41142	1.65002	2.04939	1.71275
10.2975	5.56318	7.46101		12.7686	4.12277	12.2241	7.32129	11.209	7.04962	9.36161	6.76298	7.06625	6.08491	11.3548	5.22498	7.00804	6.091	6.55562	7.78313		32.309	5.43149	43.624	6.64078	23.6328	12.2558	12.6666	7.11578	17.5084	4.88765	25.5076	7.9671	40.2623	7.8845	39.3651	8.49947	31.9464	12.4945	34.349	7.6229		1.39887	1.57091	1.67128	1.69702	1.42396	1.64662	2.07129	1.72168
10.2648	5.5654	7.45325		12.7586	4.17766	12.493	7.30854	11.2478	7.05128	9.35551	6.75743	7.01081	6.09932	11.3548	5.21001	6.96091	6.09655	6.55008	7.77482		31.9464	5.46362	43.4014	6.59719	23.5594	12.2719	12.6666	7.16397	17.4372	4.95649	25.503	7.98087	40.221	7.8845	39.4248	8.49029	31.9602	12.4899	34.3145	7.59996		1.40333	1.57112	1.67362	1.70999	1.42396	1.64364	2.0664	1.7136
10.2609	5.56651	7.45436		12.7453	4.21536	12.6427	7.29856	11.2899	7.04851	9.34941	6.73692	7.00194	6.10819	11.347	5.19837	6.94095	6.10542	6.55451	7.75819		31.2466	5.48656	43.4244	6.53752	23.4975	12.2857	12.5978	7.21216	17.155	5.01616	25.4525	7.97399	40.1981	7.87991	39.4294	8.4857	31.9809	12.4738	34.31	7.62749		1.38994	1.5741	1.66937	1.71467	1.42332	1.64024	2.05981	1.70935
10.2631	5.5715	7.4538		12.7226	4.22645	12.7054	7.29579	11.3598	7.01857	9.34109	6.7214	7.01691	6.10764	11.3215	5.18728	6.96313	6.16086	6.56116	7.71439		30.5903	5.49115	43.4909	6.50081	23.4561	12.2949	12.5312	7.25346	17.0081	5.07811	25.4594	7.97628	39.9916	7.84549	39.3812	8.4857	31.9969	12.3706	34.2457	7.64585		1.37718	1.5741	1.67171	1.71275	1.4229	1.65448	2.05343	1.70935
10.2703	5.58592	7.4405		12.6333	4.22146	12.7004	7.33016	11.4352	6.96645	9.3422	6.70643	7.01691	6.11207	11.2761	5.18451	6.97976	6.19191	6.56671	7.69054		30.2323	5.51181	43.5254	6.47786	23.4263	12.2994	12.4234	7.26723	17.015	5.1263	25.4525	8.02447	39.7414	7.83401	38.9521	8.4857	32.0107	12.1824	34.2572	7.62749		1.38058	1.58197	1.67107	1.70722	1.42609	1.6649	2.05811	1.71275
10.2792	5.59423	7.34236		12.3849	4.23975	12.6743	7.3845	11.4186	6.94428	9.34608	6.70643	7.01746	6.13425	11.2106	5.18506	6.94261	6.20023	6.58001	7.72326		30.2599	5.52557	43.5162	6.45033	23.4194	12.288	12.2329	7.26264	16.976	5.15154	25.4732	8.17822	39.7277	7.84319	38.3784	8.48341	32.0061	11.9943	34.3168	7.61602		1.38228	1.60451	1.67256	1.71722	1.42694	1.6598	2.06024	1.71063
10.277	5.59368	7.13389		12.0634	4.283	12.6583	7.40002	11.362	6.94816	9.35939	6.72361	7.06792	6.11041	11.1319	5.18783	6.88717	6.19801	6.59997	7.73601		29.6426	5.52787	43.5185	6.4205	23.4401	12.265	12.07	7.26035	16.7764	5.18596	25.4686	8.34573	39.59	7.83172	38.3715	8.49029	32.0245	11.8497	34.2755	7.62749		1.38228	1.60898	1.6783	1.73402	1.43396	1.67766	2.06279	1.70871
10.2748	5.58758	6.95869		11.8161	4.28688	12.6511	7.41	11.2938	6.9598	9.36493	6.74302	7.13777	6.06162	11	5.18894	6.82064	6.19635	6.60441	7.72825		29.0437	5.54852	43.4978	6.39525	23.4401	12.2536	12.0952	7.26035	16.088	5.23185	25.3561	8.47652	39.0071	7.77665	38.0526	8.52012	31.9832	11.7235	34.0644	7.64356		1.37824	1.61195	1.67937	1.73508	1.44523	1.69659	2.07044	1.70467
10.2736	5.57538	6.89382		11.6969	4.28466	12.6494	7.42109	11.2367	6.96424	9.35384	6.74302	7.19377	6.02946	10.7067	5.19338	6.74468	6.20134	6.58057	7.72825		28.8762	5.58753	43.3992	6.3769	23.4103	12.2536	12.1939	7.24887	15.6175	5.26627	25.0601	8.64633	38.1053	7.74682	37.7565	8.54307	31.9074	11.6501	33.7294	7.65732		1.38015	1.61918	1.67937	1.71445	1.44034	1.69383	2.07108	1.69638
10.2687	5.5898	6.87054		11.6708	4.29409	12.6599	7.41499	11.2256	6.95758	9.35163	6.76908	7.24201	5.98843	10.2581	5.22276	6.70753	6.19579	6.56338	7.72658		28.7683	5.61507	42.892	6.35166	23.4171	12.2536	12.2719	7.2351	15.4569	5.30299	24.9569	8.84596	37.5982	7.74223	37.7588	8.55454	31.8776	11.6501	33.4816	7.65962		1.37292	1.61918	1.67937	1.69361	1.44523	1.68808	2.07853	1.72828
10.2637	5.59146	6.85335		11.6719	4.3024	12.6888	7.40778	11.2273	6.93929	9.35495	6.77684	7.3041	5.98289	9.92547	5.29262	6.72694	6.20134	6.65375	7.73656		28.6995	5.63342	41.4762	6.32182	23.4332	12.2536	12.3063	7.23281	13.4261	5.3397	25.0005	9.03183	37.7061	7.73534	37.7015	8.56143	31.8569	11.6501	33.4517	7.64126		1.37229	1.62046	1.67937	1.69425	1.45225	1.69234	2.07853	1.73423
10.2615	5.5898	6.83783		11.6791	4.32403	12.7209	7.36232	11.204	6.91933	9.34331	6.77739	7.38727	5.99786	9.76634	5.37357	6.76741	6.20134	6.91046	7.73545		28.6674	5.6449	40.6639	6.29888	23.4883	12.2558	12.327	7.22593	11.8772	5.35806	24.8743	9.19017	37.3297	7.75829	37.6808	8.56831	31.8524	11.611	33.3967	7.63208		1.36867	1.64258	1.67235	1.69127	1.44097	1.67128	2.07151	1.73104
10.277	5.60643	6.83505		11.6814	4.36062	12.7326	7.25864	11.1746	6.93042	9.32113	6.78904	7.43551	5.9962	9.67264	5.40961	6.7785	6.19579	7.18157	7.70995		28.6329	5.6449	40.6042	6.28281	23.5709	12.2581	12.4096	7.22363	11.7946	5.38101	24.7756	9.27966	36.6046	7.84778	37.6992	8.5706	31.6757	11.5743	33.0066	7.63897		1.36782	1.68851	1.67575	1.69106	1.43183	1.66767	2.07789	1.72955
10.2914	5.65633	6.83117		11.673	4.39887	12.7015	7.13667	11.1973	7.08954	9.26514	6.82175	7.40612	6.00784	9.62884	5.42014	6.76575	6.19025	7.33127	7.71161		28.649	5.6449	40.5997	6.24381	23.5961	12.2375	12.4257	7.23969	11.7717	5.39937	24.6907	9.31867	36.3224	7.91203	37.7313	8.54995	31.4187	11.5812	32.6303	7.64815		1.37101	1.70573	1.68681	1.69298	1.43098	1.67299	2.08278	1.73359
10.2997	5.66465	6.80789		11.6481	4.40442	12.6344	6.98032	11.2733	7.27805	9.111	6.84503	7.34347	6.02835	9.63494	5.42846	6.7469	6.19025	7.40113	7.70773		28.7936	5.6449	40.6111	6.2025	23.5961	12.1893	12.3981	7.24887	11.7786	5.3833	24.6218	9.32785	36.3476	7.87302	37.7933	8.50865	31.2053	11.5973	32.5316	7.65503		1.37165	1.70744	1.69149	1.69893	1.42885	1.67065	2.08661	1.73317
10.323	5.66409	6.79236		11.5971	4.40386	12.5668	6.93707	11.4158	7.34624	8.93358	6.84171	7.31797	6.03223	9.65767	5.42846	6.69977	6.17971	7.37895	7.72048		29.1653	5.63801	39.8975	6.24839	23.6007	12.1434	12.3935	7.25805	11.7969	5.37412	24.6127	9.34391	36.2581	7.85237	37.9493	8.45817	31.0653	11.6088	32.5293	7.68027		1.3691	1.70276	1.69553	1.69999	1.43055	1.67575	2.08873	1.73381
10.3485	5.66298	6.7907		11.5594	4.4521	12.5585	6.92931	11.5228	7.3407	8.84266	6.83505	7.31797	6.03223	9.66322	5.45507	6.64655	6.16641	7.29357	7.72991		29.6495	5.63113	39.1058	6.35624	23.5938	12.1342	12.3706	7.26952	11.8176	5.36495	24.6195	9.36915	36.2581	7.89138	38.0617	8.4444	31.1089	11.6042	32.4375	7.70781		1.35591	1.70403	1.70191	1.70191	1.43864	1.67596	2.09171	1.74061
10.3457	5.67074	6.80068		11.5527	4.4704	12.5834	6.8722	11.5949	7.30632	8.79719	6.82951	7.32573	6.02392	9.45309	5.57871	6.62714	6.19635	7.23314	7.73989		29.8491	5.61965	38.998	6.42738	23.564	12.1388	12.3316	7.28329	11.8612	5.33282	24.631	9.41045	36.2467	7.91892	38.0893	8.4421	30.9827	11.5881	32.3549	7.71699		1.36038	1.70084	1.70701	1.70191	1.44544	1.65704	2.09469	1.73381
10.343	5.69736	6.81232		11.5549	4.45709	12.5945	6.86666	11.6448	7.28636	8.76337	6.79569	7.3285	5.9524	8.95687	5.72009	6.6277	6.27785	7.21484	7.74322		29.8491	5.56458	38.936	6.48475	23.4561	12.1388	12.3017	7.30853	11.9185	5.30987	24.6379	9.44946	36.2099	7.90515	38.0801	8.42604	30.8496	11.5674	32.3388	7.71928		1.36038	1.69744	1.70425	1.70425	1.45033	1.64109	2.10234	1.73147
10.3346	5.7212	6.81288		11.5455	4.45709	12.5995	6.84226	11.6159	7.28082	8.75118	6.82507	7.36786	5.89363	8.4723	5.75945	6.6288	6.34383	7.21761	7.74488		29.8445	5.52328	38.8305	6.55359	23.2198	12.1411	12.2765	7.36131	11.9552	5.29152	24.6356	9.45405	35.9828	7.89826	38.0365	8.42604	30.8634	11.556	32.3503	7.73305		1.35336	1.71211	1.6917	1.71211	1.45246	1.64109	2.12063	1.73147
10.3114	5.73561	6.80789		11.5511	4.48038	12.6067	6.80234	11.5605	7.27306	8.75672	6.86666	7.38782	5.89307	8.05536	5.75003	6.62603	6.36933	7.21761	7.74488		29.8422	5.55081	38.8282	6.62472	22.8572	12.1365	12.2421	7.40491	11.9392	5.28463	24.6402	9.44946	35.9025	7.91892	38.1145	8.41916	30.8496	11.5491	32.3572	7.7537		1.34932	1.71211	1.68617	1.71594	1.44438	1.64066	2.16125	1.73338
10.2997	5.73561	6.81177		11.5821	4.48204	12.6178	6.79569	11.5439	7.26807	8.77723	6.88329	7.41555	5.86923	7.71938	5.74892	6.62326	6.36434	7.21318	7.76096		29.8629	5.58982	38.8465	6.69356	22.5498	12.1296	12.1732	7.41638	11.9277	5.31905	24.6425	9.44946	35.8887	7.94416	38.3532	8.43063	30.666	11.5399	32.3044	7.76976		1.33635	1.69808	1.69383	1.71488	1.42417	1.63853	2.18358	1.74869
10.3003	5.73728	6.82452		11.6126	4.45321	12.6461	6.79236	11.5422	7.27195	8.84765	6.92764	7.48374	5.79327	7.49871	5.74892	6.62382	6.35713	7.20431	7.77981		29.8376	5.61048	38.8557	6.75552	22.5383	12.1273	12.1365	7.38196	11.8818	5.38789	24.6448	9.44029	35.8887	7.96022	38.6469	8.41916	30.8519	11.533	32.2172	7.7973		1.31466	1.69787	1.70212	1.71275	1.40376	1.63875	2.1755	1.76719
10.3008	5.76167	6.82896		11.6381	4.44434	12.6915	6.74856	11.474	7.27638	8.94634	7.02578	7.51146	5.69736	7.33515	5.74393	6.62326	6.35159	7.18213	7.78979		29.7413	5.6426	38.8511	6.79453	22.2652	12.1251	12.1365	7.3223	11.6753	5.44067	24.6356	9.4357	35.8061	7.96481	39.0071	8.37785	30.7647	11.5353	32.1025	7.8409		1.31827	1.71509	1.70892	1.72339	1.40312	1.63513	2.1755	1.75975
10.2986	5.72785	6.79791		11.6475	4.44323	12.7398	6.69035	11.3964	7.27638	8.9674	7.09453	7.50869	5.58869	7.22648	5.7467	6.62271	6.36046	7.16272	7.80531		29.7436	5.65178	38.8488	6.806	21.625	12.0906	12.1319	7.2787	11.5629	5.49115	24.6425	9.44946	35.7212	7.95334	39.1861	8.36867	30.6316	11.5468	32.0405	7.86155		1.33273	1.7287	1.71105	1.73402	1.40291	1.63109	2.18358	1.73955
10.2881	5.69791	6.72195		11.6353	4.43491	12.7874	6.65764	11.3825	7.27638	8.97406	7.09786	7.50037	5.4218	7.14498	5.7334	6.61162	6.36656	7.13944	7.81917		29.7183	5.65178	38.835	6.8083	21.2785	12.031	12.1113	7.25346	11.5629	5.5577	24.6517	9.45635	35.7189	7.92351	39.0691	8.36638	30.6637	11.5629	32.0245	7.85237		1.32295	1.7219	1.71105	1.73785	1.39844	1.62769	2.17443	1.73721
10.2792	5.6968	6.63379		11.6165	4.42937	12.8185	6.66484	11.3537	7.2786	9.07164	7.03742	7.49816	5.15845	7.07401	5.67962	6.60829	6.36656	7.0973	7.81917		29.6977	5.65637	38.8328	6.80141	21.2211	11.9621	12.0379	7.24428	11.5652	5.63342	24.6677	9.45176	35.6363	7.88679	38.2338	8.34573	30.6545	11.5537	31.7193	7.82484		1.32423	1.71998	1.71509	1.73636	1.40525	1.63896	2.17443	1.73848
10.2809	5.69791	6.53843		11.6076	4.44545	12.8418	6.66318	11.3099	7.26529	9.16534	6.99307	7.50426	4.92503	7.00637	5.653	6.59887	6.37099	7.07457	7.81363		29.6724	5.67014	38.8167	6.80371	21.2487	11.8382	11.9461	7.24658	11.572	5.7298	24.67	9.41963	35.5124	7.82713	35.9323	8.28836	30.6591	11.533	31.2534	7.79959		1.32933	1.72402	1.70488	1.73636	1.41801	1.64109	2.1721	1.74125
10.2759	5.69847	6.3904		11.6076	4.44766	12.8617	6.65209	11.286	7.25476	9.20304	7.05406	7.50592	4.83466	6.96867	5.6469	6.57225	6.38208	7.08122	7.81307		29.5967	5.67014	38.7593	6.8083	21.1844	11.6982	11.8956	7.2374	11.5147	5.8583	24.6838	9.37603	35.5147	7.756	35.0052	8.22411	30.689	11.533	31.0377	7.78353		1.32975	1.71807	1.68298	1.73317	1.43842	1.64917	2.17486	1.74082
10.2537	5.69569	6.18692		11.5782	4.51253	12.8651	6.67427	11.286	7.27472	9.21191	7.12669	7.5037	4.884	6.94871	5.60643	6.56948	6.37709	7.08178	7.80531		29.5783	5.67014	38.6308	6.81288	20.8517	11.6202	11.8222	7.22363	11.4894	5.96156	24.4176	9.36915	35.5215	7.74682	34.9961	8.19657	30.7463	11.5284	31.0446	7.77435		1.33677	1.71913	1.67384	1.73636	1.49095	1.68468	2.17656	1.74125
10.2315	5.69625	6.05718		11.4884	4.58239	12.8601	6.6909	11.2838	7.28193	9.19029	7.14387	7.5037	4.97049	6.9476	5.5959	6.56449	6.37155	7.07401	7.76151		29.6151	5.66325	38.4633	6.81059	20.4111	11.5766	11.7373	7.21445	11.4848	6.02581	23.626	9.40816	35.5192	7.73993	34.9066	8.17822	30.6981	11.5307	31.0194	7.76517		1.33167	1.71934	1.67384	1.75103	1.53008	1.70191	2.17847	1.74359
10.1933	5.71011	6.06217		11.377	4.61344	12.8601	6.68591	11.2977	7.27638	9.14205	7.14554	7.50814	4.94056	6.95925	5.63249	6.5717	6.37321	7.06958	7.67668		29.7413	5.66325	38.3715	6.806	20.2023	11.5284	11.7235	7.19609	11.4848	6.08088	22.7127	9.47929	35.4711	7.73305	34.8905	8.13691	30.6431	11.5353	30.7922	7.756		1.33167	1.71956	1.67384	1.75103	1.53433	1.70403	2.17954	1.74359
10.1084	5.74726	6.07271		11.2805	4.61344	12.8562	6.69035	11.3232	7.28525	9.0855	7.13888	7.58409	4.89177	6.9537	5.78385	6.58778	6.37377	7.07956	7.58576		29.7734	5.66325	38.1994	6.8083	20.2115	11.4711	11.7212	7.18233	11.5445	6.10842	22.1413	9.55502	34.8148	7.73305	34.8951	8.07266	30.6545	11.5422	30.2897	7.7537		1.3306	1.71148	1.66299	1.74848	1.53306	1.73253	2.18209	1.73295
10.0369	5.8027	6.03722		11.1424	4.61122	12.8412	6.69589	11.3282	7.35345	9.01398	7.12502	7.80919	4.86959	6.95758	5.96404	6.58112	6.36379	7.10285	7.57134		29.7803	5.6862	37.8988	6.78764	20.2046	11.4229	11.7373	7.17315	11.5973	6.1176	22.1161	9.60321	34.1677	7.73075	34.8515	8.0107	30.5903	11.5307	29.8193	7.76058		1.33762	1.69999	1.65874	1.75103	1.54071	1.75635	2.18145	1.71637
10.0325	5.84594	5.92079		11.0094	4.61122	12.8274	6.69534	11.3215	7.44216	8.97738	7.12613	8.1036	4.86792	6.96091	6.01006	6.53566	6.28949	7.09508	7.5974		29.6885	5.69308	37.9034	6.73028	20.0187	11.3931	11.7418	7.16167	11.6271	6.12448	21.9853	9.62615	34.0943	7.69863	34.5555	7.96481	29.7022	11.5032	29.6678	7.77435		1.34039	1.70552	1.66278	1.78548	1.5573	1.75635	2.19804	1.71403
10.0319	5.84262	5.69237		10.9861	4.62397	12.8579	6.69423	11.3199	7.4283	9.06609	7.22205	8.36917	4.88456	6.9598	6.00562	6.5218	6.22906	7.01247	7.50204		29.381	5.71833	37.7611	6.67061	19.5896	11.377	11.7189	7.13414	11.5858	6.12219	21.4139	9.61697	33.8556	7.68486	34.3398	7.90974	26.2947	11.517	29.6724	7.79959		1.33507	1.70552	1.66618	1.79867	1.55432	1.77251	2.20633	1.71594
10.0269	5.84151	5.53657		10.9867	4.58516	12.9272	6.70144	11.3171	7.38893	9.18031	7.35955	8.54992	4.94776	6.96313	6.0533	6.52235	6.22684	6.91545	7.25421		29.2112	5.76422	37.713	6.64308	19.1926	11.354	11.7189	7.07448	11.5583	6.10383	20.9664	9.57108	31.5403	7.68257	34.3467	7.82254	23.2175	11.5674	29.5692	7.83172		1.33847	1.69191	1.66575	1.79718	1.54986	1.81717	2.20421	1.71339
9.97148	5.85038	5.48778		10.9745	4.63617	12.966	6.7225	11.3171	7.37285	9.21302	7.45048	8.60758	4.9583	6.98032	6.10764	6.5218	6.22629	6.88717	6.95038		29.1561	5.78258	37.6648	6.61325	19.0917	11.3288	11.6707	7.00793	11.5422	6.10154	20.5052	9.54813	30.7899	7.65273	33.6674	7.67339	22.8159	11.5927	29.2823	7.87991		1.35293	1.68787	1.6649	1.80696	1.55049	1.82015	2.20484	1.70765
9.92602	5.85149	5.48224		10.9567	4.64449	12.9615	6.74135	11.3093	7.40667	9.21302	7.47154	8.60758	4.95719	6.98919	6.12316	6.52235	6.17583	6.89161	6.77019		29.2043	5.78946	37.2999	6.56277	19.1376	11.3173	11.5537	6.9804	11.5009	6.10613	19.9109	9.54813	30.6821	7.59766	32.41	7.52423	22.793	11.5835	28.9817	7.90974		1.34592	1.69489	1.66171	1.83014	1.5522	1.80994	2.20421	1.70148
9.92547	5.82709	5.48002		10.9584	4.64948	12.9466	6.74579	11.3088	7.45602	9.23298	7.45269	8.63031	4.95386	6.96424	6.12261	6.51515	5.9341	6.89438	6.7031		29.1699	5.79634	37.0177	6.50999	19.1949	11.3196	11.4045	6.96892	11.3816	6.10842	19.725	9.54813	30.4572	7.56095	31.9143	7.43474	22.1826	11.5606	28.7936	7.88909		1.34103	1.72339	1.65129	1.82397	1.55283	1.80079	2.20548	1.69787
9.87945	5.77498	5.49388		10.9079	4.64227	12.9305	6.72084	11.3082	7.51035	9.29397	7.56746	8.69241	4.94	6.95204	6.14035	6.51126	5.64635	6.89382	6.71308		28.5388	5.80782	37.0085	6.46409	19.2248	11.3127	11.3036	6.96433	11.2852	6.10842	19.725	9.5183	30.4228	7.55177	31.8271	7.37737	20.3905	11.5422	28.7477	7.8822		1.34103	1.73338	1.64704	1.8244	1.55283	1.79824	2.21824	1.69999
9.70924	5.72342	5.51218		10.7388	4.62896	12.9105	6.67926	11.3293	7.57966	9.33555	7.75708	8.76171	4.96273	6.97422	6.16474	6.50628	5.57427	6.89105	6.71585		27.7793	5.80093	36.9465	6.42967	19.0917	11.276	11.2347	6.95286	11.2646	6.11989	19.7112	9.48388	30.3126	7.54489	31.8042	7.33607	19.0137	11.5606	28.7798	7.89826		1.34443	1.73678	1.64619	1.82376	1.54901	1.79463	2.24567	1.69999
9.46972	5.7334	5.52105		10.629	4.67554	12.9044	6.67649	11.3614	7.64896	9.33832	7.88792	8.81383	4.94998	7.17437	6.16419	6.50572	5.57372	6.89549	6.70532		27.5384	5.81241	36.3637	6.39525	18.8668	11.221	11.2026	6.92532	11.2646	6.13596	19.6929	9.47929	29.973	7.54489	31.8042	7.3246	18.6259	11.6065	28.8188	7.93268		1.34889	1.74082	1.6464	1.81951	1.54433	1.78995	2.26928	1.71339
9.30505	5.60754	5.51827		10.6191	4.68496	12.9061	6.67981	11.3581	7.685	9.31947	7.91675	8.85929	4.91616	7.58021	6.16641	6.52568	5.57483	6.90713	6.7031		27.4833	5.86289	35.0397	6.35166	18.8347	11.1842	11.2072	6.90008	11.2646	6.15431	19.6057	9.47241	29.895	7.53571	31.8661	7.3246	18.3413	11.6386	28.8395	8.00611		1.34953	1.74359	1.64704	1.82525	1.54433	1.78782	2.27162	1.72424
9.23963	5.27266	5.52604		10.6285	4.7149	12.9277	6.65985	11.3204	7.67059	9.32779	7.89291	8.90254	4.90895	8.03817	6.15754	6.54176		6.93374	6.69367		27.4604	5.89731	34.365	6.31953	18.8783	11.1659	11.003	6.87714	11.2531	6.17038	19.5644	9.44258	30.0281	7.51735	31.9923	7.30394	18.0017	11.6569	28.8142	8.07266		1.35442	1.74082	1.64704	1.84184	1.54135	1.78591	2.27204	1.7253
9.24407	5.02538	5.54045		10.5808	4.86293	12.9177	6.65985	11.291	7.66892	9.38988	7.88792	8.96186	4.88899	8.41519	6.14312	6.5534		6.93485	6.68203		27.3892	5.88354	34.3168	6.30576	18.674	11.1475	10.5004	6.86107	11.2095	6.18644	19.5575	9.3921	30.1451	7.51964	32.0336	7.29018	17.8411	11.6822	28.6926	8.09102		1.38058	1.7219	1.63875	1.83588	1.54177	1.76188	2.27204	1.71701
9.29286	4.94887	5.52825		10.4793	5.03204	12.895	6.6277	11.2799	7.74876	9.45919	7.88792	9.04502	4.88234	8.62976	6.15088	6.55285		6.91656	6.67649		27.1391	5.83765	34.3191	6.29658	17.8801	11.1177	9.86939	6.87484	11.1567	6.20939	19.5414	9.3462	30.3103	7.53112	32.0176	7.29018	17.7562	11.7143	28.5411	8.09102		1.38462	1.72126	1.62748	1.82419	1.5422	1.71509	2.28587	1.68872
9.33333	4.95054	5.51772		10.4516	5.08083	12.9055	6.54619	11.2849	7.80808	9.49467	7.89624	9.12098	4.88844	8.75727	6.16419	6.54841		6.91877	6.67482		26.8867	5.80323	34.2709	6.28281	17.5703	11.0649	9.29802	6.91156	11.0993	6.23463	19.5414	9.31178	30.4687	7.53571	32.0887	7.29247	17.6759	11.7258	28.4815	8.06807		1.37611	1.71233	1.62641	1.81185	1.54837	1.70446	2.31564	1.68574
9.34553	4.94056	5.51329		10.4638	5.07805	12.9538	6.50295	11.2434	7.81529	9.49744	7.90178	9.10047	4.90008	8.86761	6.16863	6.53621		6.91822	6.66817		26.8683	5.79864	33.9749	6.26675	17.5887	11.0007	9.02036	6.93221	11.042	6.2461	19.5506	9.29343	30.5375	7.53571	32.0451	7.29706	17.6392	11.735	28.4884	8.01529		1.38462	1.7034	1.62705	1.78973	1.55283	1.70212	2.34456	1.68893
9.34276	4.94111	5.50552		10.3984	5.10079	13.0297	6.48133	11.0937	7.80975	9.51463	7.89347	8.98071	4.90895	8.9541	6.14977	6.50073		6.93097	6.59776		26.9142	5.80093	33.7133	6.24381	17.5428	10.9249	8.94693	6.94368	11.0053	6.24151	19.5575	9.27277	30.5306	7.52882	31.4944	7.29706	17.6392	11.7418	28.4998	7.98776		1.38462	1.70616	1.63683	1.7808	1.55475	1.70637	2.39113	1.69212
9.33389	4.93279	5.5083		10.2005	5.10245	13.0758	6.48243	10.9822	7.78092	9.5917	7.8979	8.8726	4.89287	9.00622	6.1032	6.4963		7.0036	6.52679		26.7972	5.79864	33.7386	6.20709	17.2284	10.8538	8.92169	6.95974	10.9731	6.23004	19.5277	9.28195	30.3952	7.51964	30.7257	7.29706	17.63	11.7441	28.47	8.00841		1.37441	1.70616	1.64662	1.7808	1.55326	1.70786	2.46429	1.69276
9.32612	4.92725	5.51994		10.0524	5.10245	13.083	6.46414	10.9878	7.79644	9.62552	7.90511	8.78278	4.88012	9.03061	6.09932	6.53455		7.0912	6.52734		26.7054	5.79864	33.7822	6.19332	16.4826	10.801	8.91022	6.98498	10.9548	6.21627	19.4129	9.31408	29.4705	7.51964	30.4228	7.29706	17.607	11.7258	28.3254	8.02447		1.37441	1.70999	1.65278	1.78314	1.55134	1.69744	2.50576	1.69531
9.32612	4.91173	5.52216		9.97148	5.09469	13.0819	6.45693	10.9312	7.95723	9.62607	7.90511	8.71403	4.88234	9.03006	6.12649	6.6288		7.1849	6.49519		26.7123	5.78717	33.7317	6.17955	16.1201	10.7551	8.8758	7.03547	10.9823	6.21168	19.3625	9.32096	29.4131	7.51964	30.5123	7.29018	17.5818	11.6524	28.1579	8.03365		1.39525	1.69957	1.68681	1.78846	1.56134	1.67639	2.54063	1.70744
9.32945	4.91339	5.5216		9.93378	5.07695	13.043	6.4536	10.8015	8.06534	9.62385	7.90733	8.70072	4.8768	9.07829	6.11485	6.74246		7.26862	6.48576		26.7352	5.73898	33.2705	6.15661	16.0145	10.7046	8.81154	7.10201	11.0626	6.2048	19.3257	9.32326	28.3736	7.53112	30.4297	7.28788	17.5611	11.556	28.0455	8.05889		1.39823	1.69829	1.69106	1.79186	1.56751	1.66852	2.59614	1.71743
9.33278	4.91339	5.51938		9.9299	5.06142	12.9721	6.44196	10.7688	8.09306	9.61221	7.8979	8.73953	4.87513	9.30783	6.11595	6.81121		7.29523	6.52845		26.7697	5.69079	31.5586	6.14743	16.0053	10.6702	8.75647	7.1502	11.1315	6.18644	19.2959	9.3026	28.2543	7.52423	30.3149	7.27411	17.5703	11.4665	28.0317	8.10938		1.39972	1.70765	1.6917	1.79122	1.56453	1.67426	2.65228	1.72509
9.33333	4.88511	5.51495		9.92325	5.05976	12.976	6.42422	10.7932	8.09306	9.58892	7.87794	8.79941	4.87402	9.81014	6.11429	6.82452		7.2664	6.5412		26.772	5.67932	29.778	6.16808	15.7438	10.6542	8.71746	7.18233	11.1796	6.18185	18.5639	9.22	28.2658	7.51505	30.2782	7.21445	17.5565	11.4022	27.9239	8.16904		1.39143	1.70744	1.68936	1.78229	1.55624	1.67703	2.69757	1.72913
9.32612	4.87014	5.52382		9.88832	5.07528	12.9909	6.41258	10.8076	8.08641	9.51685	7.8785	8.85652	4.86737	10.3507	6.10653	6.82175		7.20597	6.54453		26.7903	5.67932	29.7229	6.17038	15.2894	10.6312	8.68763	7.19839	11.2072	6.18644	18.2082	9.10067	28.1556	7.52194	30.1566	7.13873	17.5588	11.3586	27.598	8.24476		1.37845	1.66724	1.69893	1.78229	1.53348	1.67384	2.73139	1.72849
9.31115	4.88234	5.5521		9.87279	5.07362	12.9793	6.41479	10.8126	8.12134	9.4359	7.87184	8.91141	4.86959	10.6562	6.10819	6.80955		7.16716	6.55285		26.7742	5.67702	29.0024	6.15661	15.2963	10.5945	8.69222	7.20527	11.1957	6.18644	18.1945	8.91939	28.2337	7.56554	30.1612	7.0653	17.5565	11.3472	27.4053	8.32966		1.38292	1.63194	1.68489	1.77846	1.52668	1.67639	2.7518	1.72487
9.2984	4.8962	5.55653		9.86947	5.07362	12.9615	6.4281	10.8031	8.17623	9.42038	7.87462	8.94135	4.8646	10.8381	6.07936	6.78238		7.1666	6.56782		26.749	5.67702	27.777	6.16808	15.3422	10.5578	8.69911	7.20527	11.1705	6.17955	18.2266	8.7886	27.6531	7.61831	30.1336	6.9781	17.5084	11.3701	27.341	8.4008		1.43736	1.63045	1.68213	1.77698	1.5288	1.70637	2.76626	1.72487
9.30838	4.89676	5.56208		9.85394	5.05366	12.9488	6.58279	10.776	8.2106	9.42481	7.87462	8.93303	4.8524	11.0133	6.08546	6.75355		7.1655	6.58168		26.6205	5.67243	27.1299	6.19562	15.4271	10.5142	8.69681	7.20298	11.1131	6.17955	18.0247	8.80237	27.0932	7.63438	30.1704	6.92532	17.3707	11.3839	27.3594	8.47193		1.49669	1.62833	1.69042	1.78357	1.5271	1.70595	2.76626	1.74827
9.33998	4.86737	5.58425		9.84563	5.04978	12.941	6.83838	10.7028	8.23167	9.42481	7.88293	8.8665	4.83909	11.1092	6.13702	6.74191		7.17492	6.6094		26.1685	5.67014	26.7605	6.2048	15.512	10.4614	8.66698	7.20298	10.9181	6.21627	17.9696	8.81613	27.1184	7.64126	30.1336	6.91614	17.2169	11.4068	27.442	8.54307		1.49988	1.62811	1.67958	1.79569	1.53433	1.72062	2.76754	1.78654
9.36604	4.7831	5.60754		9.84507	5.04812	12.9177	7.09176	10.5681	8.21504	9.4237	7.89901	8.80939	4.81193	11.1386	6.12039	6.73248		7.20209	6.62492		25.939	5.67473	26.3956	6.19103	15.5395	10.4224	8.59814	7.21216	10.5853	6.24381	17.9788	8.81613	27.0634	7.63208	29.8858	6.91614	17.1412	11.4596	27.4259	8.59126		1.49627	1.62386	1.67405	1.79909	1.53135	1.72126	2.76499	1.821
9.37269	4.74262	5.62029		9.85561	5.03259	12.8756	7.25809	10.4466	8.27159	9.45198	7.904	8.78999	4.81137	11.1552	6.05164	6.73138		7.26197	6.61882		25.9344	5.67473	26.0629	6.17726	15.4064	10.4086	8.53618	7.23281	10.3742	6.28511	17.9558	8.8322	27.0106	7.59537	29.5967	6.91614	17.1206	11.5124	27.3686	8.63256		1.49733	1.59281	1.67384	1.79675	1.52731	1.72083	2.7618	1.82674
9.37325	4.74318	5.6214		9.85062	5.03536	12.8041	7.21318	10.3463	8.40465	9.51962	7.89402	8.78666	4.81414	11.163	6.01782	6.74413		7.32185	6.61661		25.9321	5.67702	25.9482	6.17267	15.3399	10.4155	8.46505	7.28329	10.3696	6.36772	17.8411	8.89186	26.9693	7.55177	29.303	6.90697	17.1297	11.5606	27.341	8.67616		1.49967	1.57771	1.67299	1.79739	1.55857	1.71871	2.75457	1.82631
9.37214	4.76092	5.61197		9.80515	5.04423	12.7137	7.2725	10.2576	8.48117	9.58726	7.88072	8.78832	4.80361	11.1558	6.04499	6.753		7.32517	6.61716		25.9252	5.67473	25.955	6.17038	15.3124	10.4201	8.41227	7.3659	10.4109	6.43426	17.7103	8.9607	26.9096	7.52882	29.101	6.89549	16.9255	11.6042	26.492	8.69681		1.49882	1.57771	1.67299	1.79994	1.59579	1.72424	2.73713	1.8295
9.37713	4.78365	5.57926		9.73807	5.05144	12.6599	7.50536	10.1844	8.50667	9.62441	7.89402	8.79276	4.79141	11.1391	6.07936	6.75411		7.30133	6.641		25.8885	5.67932	25.978	6.17038	15.1884	10.4063	8.4008	7.45539	10.4316	6.48016	17.708	8.98823	26.8936	7.4967	29.0987	6.91156	16.563	11.6455	24.5989	8.68763		1.50094	1.57771	1.67213	1.79973	1.60472	1.72445	2.74053	1.84864
9.39654	4.79252	5.57926		9.70037	5.06697	12.6355	7.70829	10.0979	8.50002	9.61055	7.89679	8.79109	4.79363	11.1319	6.07881	6.75743		7.28026	6.66872		25.9069	5.71144	25.9918	6.17038	14.9865	10.3972	8.4008	7.54718	10.4476	6.55129	17.6805	8.99053	26.9395	7.4095	28.9794	6.95974	16.2784	11.6891	22.4648	8.66928		1.50073	1.57559	1.66299	1.79952	1.61621	1.73381	2.74925	1.85502
9.41594	4.79585	5.58647		9.67653	5.06419	12.6344	7.85909	9.98812	8.49392	9.57839	7.89236	8.79054	4.78975	11.138	6.11983	6.74579		7.26419	6.64156		25.9092	5.74586	25.9413	6.16808	14.8488	10.4132	8.38015	7.6229	10.4431	6.62472	17.5933	8.98594	27.0404	7.26494	28.8188	7.01252	15.9824	11.751	21.0284	8.66469		1.50243	1.57708	1.66299	1.79952	1.62344	1.73381	2.74797	1.84864
9.43036	4.8025	5.59368		9.63993	5.06087	12.6294	7.93228	9.92158	8.4723	9.56786	7.88903	8.79165	4.76314	11.1474	6.22351	6.73914		7.22039	6.62603		25.9344	5.75733	25.8403	6.1612	14.8075	10.4362	8.30442	7.71928	10.4431	6.70045	17.4625	8.98594	27.2722	7.16167	28.727	7.07218	15.8195	11.7625	21.0261	8.65551		1.50392	1.57644	1.66533	1.81929	1.6128	1.73508	2.72884	1.84673
9.44921	4.80084	5.59922		9.62774	5.06586	12.6427	7.93172	9.92048	8.46564	9.57562	7.89458	8.79109	4.73209	11.1502	6.29559	6.71973		7.16162	6.62714		25.9252	5.75275	25.7348	6.16579	14.8075	10.4591	8.25853	7.85237	10.4086	6.806	17.2743	8.97906	27.4925	7.14561	28.688	7.11119	15.8195	11.7487	19.5047	8.64174		1.50435	1.57155	1.66108	1.82036	1.62641	1.73551	2.69098	1.85034
9.46972	4.78254	5.57039		9.61554	5.12241	12.6788	7.88626	9.90883	8.49946	9.59835	7.91343	8.78444	4.72266	11.1125	6.2784	6.66872		7.15663	6.61217		25.9229	5.70685	25.6338	6.19562	14.7754	10.4821	8.25623	8.02218	10.3421	6.8932	17.1573	8.97676	27.4787	7.14791	28.6582	7.12955	15.707	11.7625	16.8154	8.63944		1.50605	1.57559	1.67341	1.82142	1.63067	1.73508	2.661	1.85396
9.48691	4.7648	5.56041		9.56675	5.13294	12.6533	7.78036	9.84285	8.50002	9.57839	7.92452	8.76282	4.72876	11.0659	6.26177	6.62991		7.15274	6.58667		25.9344	5.67014	25.5741	6.21627	14.7226	10.5096	8.25623	8.23329	10.3352	6.94827	17.0632	8.96299	27.5062	7.1525	28.6421	7.14102	15.6749	11.774	15.6634	8.65321		1.5018	1.59579	1.68128	1.82078	1.63258	1.74061	2.64079	1.86119
9.50798	4.7587	5.60477		9.52128	5.15512	12.5784	7.64453	9.75969	8.48172	9.55344	7.93061	8.73898	4.69439	11.0698	6.26842	6.60663		7.16051	6.55008		25.9367	5.67014	25.4823	6.24839	14.6538	10.5555	8.25853	8.48341	10.3788	7.02629	16.914	8.92857	27.8091	7.15479	28.6513	7.12496	15.6864	11.7786	15.1861	8.67157		1.50307	1.59579	1.68341	1.80781	1.63258	1.74252	2.60975	1.86884
9.5174	4.72876	5.63471		9.4797	5.1651	12.4736	7.56025	9.85505	8.42739	9.58172	7.93172	8.72955	4.60457	11.1192	6.27563	6.58445		7.14997	6.45582		25.8472	5.67932	25.2093	6.30576	14.6354	10.6289	8.25623	8.71976	10.3995	7.14561	16.7993	8.89186	28.0845	7.15479	28.6444	6.99416	15.7438	11.7854	14.9521	8.69681		1.50796	1.59579	1.68766	1.78803	1.6379	1.73593	2.57211	1.86353
9.50798		5.63304		9.45531	5.19393	12.2663	7.55138	10.1101	8.34589	9.59946	7.92562	8.71625	4.57407	11.1502	6.29448	6.55562		7.13168	6.30113		25.5672	5.69308	24.9729	6.34248	14.6308	10.723	8.25164	8.90104	10.4178	7.29247	16.7052	8.8758	27.8872	7.16626	28.6421	6.77846	15.7896	11.8061	15.0944	8.72894		1.52944	1.59685	1.68745	1.78654	1.6379	1.73636	2.54574	1.84545
9.42093		5.62639		9.45642	5.26324	11.9575	7.53475	10.2642	8.31983	9.61332	7.9223	8.70516	4.57075	11.1513	6.33496	6.50905		7.13278	6.16641		25.3286	5.71833	24.9179	6.3769	14.5781	10.824	8.24476	9.05937	10.4224	7.46687	16.5308	8.8758	27.8527	7.17544	28.6444	6.62931	15.8057	11.8451	15.154	8.75418		1.52987	1.60132	1.6883	1.78421	1.63152	1.72934	2.51937	1.84205
9.25349		5.63249		9.46917	5.30537	11.7667	7.52865	10.2764	8.31151	9.63383	7.92784	8.71015	4.57685	11.1585	6.33939	6.45748		7.13445	6.11318		25.2391	5.73898	24.8834	6.41591	14.5735	10.9226	8.23788	9.23376	10.4018	7.59078	16.3037	8.88268	27.6898	7.17774	28.6192	6.53293	15.7896	11.8772	15.1655	8.7863		1.53688	1.59515	1.68702	1.78591	1.63301	1.72849	2.49959	1.84737
9.05334		5.63526		9.48525	5.27266	11.7063	7.53808	10.2781	8.31096	9.62663	7.95667	8.71126	4.75593	11.1707	6.36046	6.44917		7.13112	6.11595		25.2276	5.75275	24.8674	6.42967	14.5023	11.0098	8.23788	9.41504	10.3857	7.65962	16.1316	8.88956	27.2378	7.17544	28.5457	6.43426	15.6795	11.8313	15.1678	8.8299		1.53837	1.60111	1.68702	1.78399	1.63237	1.72849	2.49342	1.85268
8.84876		5.63027		9.49689	5.19449	11.6847	7.522	10.2792	8.3043	9.6355	7.94226	8.71569	4.97937	11.1707	6.3405	6.4536		7.13278	6.01893		25.2024	5.76651	24.8307	6.43656	14.4151	11.0925	8.21264	9.62615	10.3742	7.75141	16.0444	8.88497	26.8477	7.16397	28.4103	6.34707	15.4867	11.673	15.154	8.8758		1.53837	1.59941	1.69787	1.7825	1.61025	1.72955	2.49193	1.85417
8.66136		5.62473		9.49633	5.1712	11.678	7.52643	10.2781	8.25551	9.65657	7.94503	8.72789	5.05421	11.1574	6.28395	6.45471		7.13944	5.85537		25.0441	5.78028	24.7779	6.44344	14.4151	11.1911	8.1415	9.89463	10.365	7.87761	16.0398	8.86891	26.4553	7.11808	28.2291	6.26675	15.3674	11.5124	15.1494	8.93546		1.54433	1.59941	1.73232	1.78293	1.59919	1.73317	2.49512	1.85204
8.44845		5.62362		9.51518	5.18284	11.6642	7.52588	10.2764	8.19231	9.68761	7.92008	8.75062	5.07916	11.1147	6.41091	6.45416		7.12613	5.73395		24.888	5.78487	24.7939	6.44115	14.4128	11.3426	8.05201	10.1769	10.3627	7.98776	15.9985	8.83908	26.453	7.063	28.174	6.17726	15.3261	11.455	15.1288	8.99512		1.54411	1.59941	1.73848	1.78102	1.59962	1.72764	2.50448	1.8497
8.21171		5.61974		9.56841	5.18007	11.6442	7.5292	10.2797	8.16736	9.73751	7.8857	8.7728	5.08859	11.0349	6.43808	6.43586		7.10395	5.60588		24.7503	5.77799	24.7985	6.44115	14.4128	11.5376	8.00611	10.4568	10.3513	8.07725	15.886	8.80237	25.9757	7.0217	28.1992	6.09006	15.3146	11.4665	15.0118	9.04101		1.55028	1.60047	1.74444	1.76251	1.606	1.72785	2.50469	1.85162
8.08752		5.62362		9.57285	5.17508	11.6464	7.54861	10.267	8.16625	9.73086	7.88182	8.78278	5.09968	10.9312	6.46081	6.35491		7.07457	5.51329		24.5989	5.7711	24.6838	6.43656	14.3968	11.7464	8.00841	10.7505	10.3191	8.1415	15.7713	8.8299	25.7393	7.00564	28.1189	6.03958	15.3445	11.4963	14.8672	9.08002		1.55241	1.60174	1.75422	1.73189	1.62577	1.72232	2.50257	1.85119
8.06146		5.61031		9.49412	5.17397	11.647	7.5475	10.2609	8.16348	9.65934	7.90511	8.79109		10.8342	6.50239	6.22241		7.04075	5.5155		24.5094	5.76192	24.4107	6.44344	14.4037	11.953	8.03365	11.0374	10.3329	8.17363	15.6405	8.88497	25.8334	7.00793	27.9262	6.01893	15.4294	11.5193	14.7226	9.10297		1.54964	1.62344	1.7555	1.70254	1.61216	1.72998	2.49449	1.8395
8.06645		5.65577		9.39487	5.17453	11.6448	7.5852	10.262	8.16569	9.57174	7.91065	8.77834		10.7721	6.50239	6.15255		6.97366	5.49055		24.4658	5.74816	24.1859	6.45033	14.2935	12.1732	8.07036	11.338	10.3421	8.20116	15.5097	8.92857	25.8633	7.01482	27.5705	6.00286	15.5395	11.5376	14.6698	9.10297		1.53816	1.6447	1.75294	1.70956	1.60876	1.73763	2.49257	1.82376
8.07809		5.74947		9.32113	5.17009	11.6575	7.61736	10.2415	8.19508	9.49024	7.90289	8.74508		10.7516	6.46081	6.12815		6.87941	5.45451		24.4658	5.75045	23.9908	6.45033	14.0686	12.4096	8.11167	11.6684	10.3765	8.2264	15.4432	8.96758	25.8885	7.01711	27.0312	6.02352	15.5625	11.5537	14.6698	9.09838		1.53199	1.64704	1.7489	1.71211	1.60919	1.74423	2.49257	1.83014
8.0792		5.86424		9.29286	5.18894	11.6647	7.64564	10.2348	8.21282	9.45531	7.91343	8.6852		10.7471	6.37266	6.11096		6.83117	5.43345		24.3901	5.7711	23.8187	6.45262	13.7749	12.6459	8.1438	11.9874	10.4476	8.24706	15.3812	9.0043	25.9137	7.01023	26.5218	6.11071	15.4523	11.5629	14.6767	9.09608		1.53348	1.65831	1.75124	1.69425	1.62599	1.74423	2.49236	1.83482
8.01156		5.91414		9.28121	5.24605	11.6664	7.65894	10.2432	8.20506	9.46362	7.92063	8.59982		10.7438	6.38264	6.10487		6.80733	5.43733		24.1927	5.79405	23.7774	6.46409	13.3596	12.8639	8.13003	12.265	10.4844	8.28377	15.2986	9.0479	25.9114	6.99416	26.1524	6.26675	15.2642	11.5743	14.6171	9.09838		1.53561	1.66916	1.74827	1.6749	1.62003	1.73891	2.49257	1.8312
7.69831		5.91303		9.2546	5.33365	11.6786	7.68223	10.2487	8.19674	9.46529	7.85299	8.45511		10.7427	6.43087	6.10653		6.79125	5.43788		24.1078	5.82618	23.7568	6.46868	12.8846	13.0819	8.08643	12.5427	10.4775	8.35491	15.2963	9.08232	25.8977	6.97581	25.7921	6.48704	15.1678	11.5996	14.3761	9.10985		1.53348	1.66852	1.74423	1.68064	1.62067	1.73827	2.49108	1.8312
7.25365		5.91913		9.22244	5.4024	11.7058	7.69775	10.2515	8.19674	9.47028	7.83858	8.28102		10.7438	6.38818	6.10154		6.79125	5.42957		24.1078	5.87436	23.5663	6.45721	12.5381	13.2747	8.06578	12.8364	10.4247	8.4444	15.2183	9.09379	25.8885	6.96433	25.3883	6.70733	15.2275	11.634	14.0962	9.12362		1.53348	1.66894	1.73295	1.70148	1.62067	1.73551	2.49151	1.8295
6.99085		5.91081		9.1986	5.42236	11.7174	7.70551	10.2515	8.19674	9.47637	7.81197	8.12855		10.7433	6.27009	6.07936		6.79014	5.42957		23.8921	5.92026	23.1739	6.45721	12.2788	13.4147	8.05889	13.1278	10.3214	8.54995	15.0829	9.09608	25.8701	6.98269	25.0578	6.90926	15.2688	11.6868	13.7864	9.12133		1.53688	1.66809	1.737	1.69574	1.6313	1.75422	2.49789	1.82929
6.86111		5.89085		9.18862	5.44398	11.7019	7.7166	10.2548	8.16957	9.47582	7.75541	8.01489		10.7466	6.23682	6.07714		6.77906	5.42458		23.4929	5.95927	22.653	6.48016	11.9438	13.5294	8.06807	13.3894	10.2572	8.66239	15.0278	9.10756	25.8587	7.03317	24.9041	7.11119	15.2688	11.7602	13.4537	9.11903		1.53497	1.66788	1.73019	1.68489	1.62854	1.76741	2.50427	1.81908
6.70033		5.89584		9.17864	5.47725	11.6708	7.73601	10.2548	8.16126	9.47637	7.73324	7.96166		10.7505	6.23737	6.07825		6.77462	5.38577		23.3873	5.9891	22.2859	6.55588	11.7074	13.6487	8.10938	13.6258	10.248	8.77942	15.0209	9.13509	25.9046	6.96892	24.927	7.27182	15.2412	11.8336	13.1921	9.12591		1.52646	1.66746	1.71318	1.6715	1.62918	1.76698	2.50746	1.82355
6.52346		5.91802		9.0478	5.46616	11.7118	7.79866	10.2592	8.16847	9.43313	7.79367	7.96277		10.7449	6.23848	6.07992		6.76852	5.33753		23.3804	5.99369	22.1734	6.62931	11.6868	13.7336	8.16445	13.83	10.2457	8.90333	14.9911	9.16263	25.9482	6.72798	24.5828	7.37278	15.2665	11.8979	13.0108	9.12821		1.52497	1.67915	1.71594	1.66788	1.62684	1.76166	2.50703	1.82504
6.35048		5.93576		8.68076	5.44454	11.7784	7.88848	10.2831	8.17124	9.31004	7.9916	7.96665		10.7366	6.23072	6.07548		6.75189	5.3148		23.3322	5.99598	22.1665	6.66373	11.6845	13.7772	8.24935	14.0182	10.2251	9.01807	14.881	9.13739	25.9023	6.51458	24.2753	7.43933	15.3124	11.9828	12.9075	9.14198		1.52497	1.68468	1.71998	1.66788	1.62705	1.75231	2.50108	1.81525
6.16364		5.93022		7.97552	5.44343	11.8216	7.93117	10.2914	8.1973	9.22189	8.24997	7.97663		10.7261	6.22684	6.07104		6.73193	5.29539		23.3139	6.0327	22.1642	6.70503	11.6707	13.8484	8.34343	14.2086	10.1998	9.09379	14.858	9.06625	25.9137	6.40673	24.2662	7.52423	15.333	12.0585	12.8685	9.19705		1.52604	1.68532	1.7202	1.66639	1.62641	1.74189	2.50384	1.81993
5.98123		5.9219		7.07124	5.42513	11.8505	7.94004	10.2698	8.2045	9.18031	8.41408	7.97885		10.7072	6.31943	6.06162		6.68924	5.271		23.3162	6.08547	22.1551	6.75781	11.6088	13.9195	8.43292	14.3555	10.1562	9.14427	13.97	8.9584	26.0377	6.34936	23.8853	7.61373	15.1357	12.0539	12.8548	9.27966		1.53497	1.68022	1.72211	1.65555	1.62216	1.73466	2.50533	1.82248
5.76722		5.91968		6.3721	5.38188	11.8566	7.93006	10.2287	8.20672	9.1609	8.41685	7.98384		10.6906	6.50683	6.05829		6.62714	5.25658		23.3139	6.10383	22.0977	6.78535	11.4917	13.9585	8.49488	14.4564	10.0805	9.18558	12.9488	8.82302	26.0331	6.34018	23.5502	7.67568	14.8351	12.0172	12.8135	9.3921		1.54114	1.67256	1.72211	1.65342	1.60664	1.7321	2.50087	1.81972
5.5338		5.9219		6.00784	5.37579	11.8488	7.95556	10.2049	8.24609	9.15591	8.40465	7.97164		10.6834	6.58334	6.05275		6.58223	5.25104		23.3047	6.08777	21.7971	6.81518	11.3839	14.0044	8.52012	14.5781	10.0071	9.21541	12.467	8.7037	25.9619	6.34707	23.3667	7.73075	14.7387	12.0631	12.7308	9.5642		1.53603	1.67171	1.71956	1.65087	1.60876	1.72636	2.4998	1.81972
5.45396		5.92301		5.86202	5.36969	11.8344	7.96388	10.2127	8.29931	9.1487	8.46564	7.94725		10.6756	6.59332	6.03889		6.5595	5.24771		23.2818	6.0717	21.4047	6.87484	11.2646	14.0618	8.52012	14.7272	9.98642	9.23835	12.0608	8.6165	25.9573	6.33559	23.268	7.7973	14.6469	12.1664	12.6551	9.77531		1.53199	1.67384	1.71956	1.65427	1.60579	1.71318	2.49959	1.82929
5.5837		5.91968		5.86091	5.38965	11.8244	7.8907	10.2271	8.39024	9.1487	8.51111	7.93782		10.6762	6.59554	6.03612		6.55562	5.24882		23.2726	6.0717	21.2165	6.91614	11.1934	14.0801	8.51553	14.8534	10.0048	9.25901	12.0195	8.55225	25.9482	6.34248	23.268	7.86614	14.5758	12.2214	12.6299	9.98183		1.53391	1.67532	1.72636	1.65172	1.60621	1.7068	2.50172	1.82929
5.72896		5.91469		5.85814	5.42957	11.825	7.80808	10.2348	8.50723	9.13983	8.46065	7.93505		10.6756	6.58833	6.04		6.56338	5.25048		23.2703	6.06941	21.0467	6.92532	11.1934	14.0801	8.50865	14.9704	10.0162	9.27966	11.9139	8.52242	25.9367	6.37001	22.9215	7.95563	14.5735	12.1641	12.6345	10.2113		1.53837	1.66916	1.73933	1.64172	1.60536	1.68957	2.50278	1.82397
5.78607		5.9086		5.93909	5.49832	11.8394	7.75985	10.2465	8.54881	9.11987	8.35864	7.92784		10.6756	6.58889	6.04998		6.56394	5.24937		23.2657	6.06712	20.6911	6.92762	11.221	14.0985	8.50406	15.1035	9.99101	9.30719	11.93	8.50865	25.6522	6.39984	22.4052	8.0543	14.5253	12.0241	12.506	10.4844		1.54263	1.66916	1.73359	1.64215	1.60536	1.68638	2.51065	1.811
[truncated: 1,185 more rows]
[truncated: 272 more columns]

## Sheet: M.vastus medialis
Subject 1																					Subject 2																					Subject 3
[truncated: 2,231 more rows]
[truncated: 272 more columns]

## Sheet: M.biceps femoris
Subject 1																					Subject 2																					Subject 3
[truncated: 2,231 more rows]
[truncated: 272 more columns]

## Sheet: M.tibialis anterior
Subject 1																					Subject 2																					Subject 3
[truncated: 2,231 more rows]
[truncated: 272 more columns]

## Sheet: M.gastrocnemius
Subject 1																					Subject 2																					Subject 3
[truncated: 1,991 more rows]
[truncated: 272 more columns]
