# Supplementary material for: An Increase in Kinematic Freedom in the Lokomat Is Related to the Ability to Elicit a Physiological Muscle Activity Pattern: A Secondary Data Analysis Investigating Differences Between Guidance Force, Path Control, and FreeD
Source: Front Robot AI. 2019 Oct 31;6:109. doi: 10.3389/frobt.2019.00109 (PMC7805962; doi:10.3389/frobt.2019.00109)
Supplement: Supplementary Data Sheet 5 — Source data sEMG FreeD hip. [file Data_Sheet_5.xlsx]

## Sheet: M.rectus femoris
Subject 1																					Subject 2																					Subject 3
Stance1	Swing1	Stance2	Swing2	Stance3	Swing3	Stance4	Swing4	Stance5	Swing5	Stance6	Swing6	Stance7	Swing7	Stance8	Swing8	Stance9	Swing9	Stance10	Swing10		Stance1	Swing1	Stance2	Swing2	Stance3	Swing3	Stance4	Swing4	Stance5	Swing5	Stance6	Swing6	Stance7	Swing7	Stance8	Swing8	Stance9	Swing9	Stance10	Swing10		Stance1	Swing1	Stance2	Swing2	Stance3	Swing3	Stance4	Swing4
3.82216	2.3782	2.92456	2.1763	3.11412	4.14034	5.07816	2.56775	4.18534	4.39799	5.08892	3.3877	3.99818	3.26066	5.10206	3.95039	5.80771	3.8807	4.56684	1.9075		13.0551	6.76805	13.5905	9.61563	16.4422	9.07414	13.3939	8.54375	9.85763	13.883	14.5031	11.3853	11.5527	9.85763	9.46538	9.58033	19.7889	9.44118	15.2553	11.0263		4.6938	19.6378	4.56017	4.02567	5.54122	3.92926	4.60415	8.41331
3.79588	2.35988	2.92456	2.17988	3.12806	4.12919	4.65445	2.56258	4.26738	4.38884	5.10922	3.38889	4.01092	3.2762	5.11799	3.96951	5.81448	3.88428	4.60388	1.88759		13.0602	6.74889	13.6147	9.62269	16.4169	9.08725	13.3667	8.54375	10.0321	13.9677	14.8096	11.3268	11.5617	9.93427	9.47647	9.56823	19.7969	9.42102	15.2523	11.3984		4.6938	19.6345	4.55679	4.04089	5.526	3.93772	4.54833	8.37441
3.75367	2.36107	2.93093	2.16634	3.09421	4.12123	4.35977	2.53868	4.4414	4.42428	5.13989	3.39965	3.98663	3.28535	5.1594	3.98026	5.81528	3.86597	4.69228	1.89794		13.0581	6.70654	13.6168	9.61865	16.3665	9.08927	13.4171	8.53871	10.1743	14.129	14.9236	11.3258	11.6031	9.96048	9.68621	9.58134	19.7969	9.42303	15.2493	11.4125		4.68872	19.5888	4.54495	4.10179	5.50739	3.9411	4.53818	8.31352
3.73455	2.33599	2.93651	2.16794	3.00819	4.12163	4.34702	2.50205	4.60706	4.50233	5.14785	3.37177	3.94203	3.28456	5.18887	3.99061	5.81767	3.85999	4.77073	1.94055		13.047	6.70351	13.6238	9.6489	16.3645	9.06608	13.5573	8.53871	10.3598	14.252	14.9901	11.3097	11.6585	9.99779	10.1632	9.59748	19.7979	9.4553	15.2493	11.2572		4.65828	18.8226	4.52465	4.14915	5.49724	3.93772	4.5348	8.26616
3.71823	2.32165	2.94806	2.18028	2.97633	4.12242	4.18773	2.4905	4.73211	4.53379	5.14706	3.35903	3.91057	3.28496	5.19922	4.00176	5.83559	3.87951	4.88463	1.95728		13.0208	6.70654	13.6178	9.70335	16.3998	9.02574	13.6692	8.52157	10.5695	14.4134	15.0022	11.3016	11.6646	10.0543	10.6905	9.59143	19.7979	9.51278	15.2483	11.1987		4.68365	17.3256	4.51619	4.13392	5.49893	3.93095	4.5348	8.25939
3.69354	2.32922	2.94806	2.20537	2.96996	4.08977	3.83092	2.50205	4.80896	4.5326	5.14706	3.35942	3.8588	3.29451	5.20321	4.00017	5.87222	3.89583	5.08414	1.9513		13.0501	6.7257	13.4383	9.73159	16.4482	9.03482	13.7327	8.50543	10.6946	14.7501	15.0043	11.3086	11.7211	10.0694	11.0757	9.59344	19.7405	9.57025	15.2301	11.1937		4.67012	16.1957	4.54495	4.09333	5.49217	3.93095	4.50943	8.25432
3.69831	2.32404	2.94328	2.20855	2.93372	4.02167	3.59677	2.49806	4.83325	4.53538	5.14666	3.36062	3.79468	3.30168	5.2036	3.99459	5.88218	3.90698	5.28444	1.96126		13.0511	6.81443	13.0662	9.77192	16.4855	9.07011	13.766	8.49232	10.7026	15.0516	15.0012	11.3016	12.0558	10.0865	11.4186	9.64689	19.6759	9.60655	15.2422	11.1947		4.60584	14.7428	4.57201	4.05273	5.48878	3.93264	4.49251	8.25263
3.70429	2.31647	2.94686	2.2201	2.95841	3.99619	3.43668	2.50125	4.84441	4.54255	5.14984	3.36181	3.78353	3.29531	5.20321	3.99977	5.87063	3.90539	5.45608	1.97081		13.04	6.86182	12.6145	9.81528	16.4946	9.0812	13.77	8.44695	10.6119	15.2311	15.0143	11.3016	12.679	10.0835	11.8421	9.70033	19.6699	9.60958	15.2916	11.234		4.47898	12.6132	4.55002	4.02905	5.49217	3.94956	4.4959	8.24924
3.71225	2.29935	2.9612	2.21811	2.98788	3.98583	3.34429	2.6478	4.8683	4.54255	5.15422	3.34907	3.78274	3.29571	5.21077	4.01212	5.83917	3.91933	5.62652	1.98873		13.1832	6.86586	12.3483	9.81831	16.538	9.10238	13.7731	8.39351	10.6613	15.3541	15.0103	11.2834	13.2437	10.0835	12.1355	9.75276	19.6659	9.60655	15.4782	11.3339		4.34874	12.4238	4.50774	4.03582	5.49047	3.97154	4.49759	8.18159
3.71424	2.26789	2.97275	2.21493	3.04363	3.9707	3.3423	2.7828	4.89179	4.54892	5.15144	3.36022	3.78154	3.2977	5.21675	4.00256	5.8113	3.93884	5.76192	2.01303		13.3627	6.86989	12.2726	9.81427	16.6378	9.15179	13.7771	8.36527	11.0556	15.4136	14.9972	11.1987	13.5169	10.0956	12.0821	9.77999	19.6588	9.6005	15.6667	11.4196		4.30815	11.1078	4.49421	4.04259	5.4854	3.98508	4.49928	8.13422
3.71424	2.24917	2.97315	2.20577	3.0727	3.97269	3.31204	2.77961	4.90812	4.57122	5.15064	3.37018	3.78433	3.30766	5.21157	3.93685	5.80851	3.95796	5.80891	2.03055		13.4524	6.88199	12.2141	9.85763	16.7255	9.13565	13.771	8.36225	11.5244	15.4288	14.9841	11.0878	13.6682	10.1017	11.8794	9.75377	19.6659	9.55916	15.7383	11.5718		4.298	8.62644	4.49421	4.04428	5.48878	3.98677	4.49928	8.11393
3.70588	2.24798	3.00222	2.20179	3.07151	3.97349	3.25151	2.78479	4.91171	4.5987	5.15064	3.37973	3.77597	3.34867	5.21157	3.86437	5.80691	4.01251	5.80612	2.0421		13.523	6.85476	12.1456	9.98468	16.8082	9.16187	13.764	8.36426	12.0105	15.459	14.9437	10.992	13.7791	10.0996	11.8834	9.7457	19.681	9.48353	15.9168	11.7916		4.31322	7.24621	4.4959	4.04597	5.48878	3.98508	4.50097	8.09363
3.69115	2.2428	3.04841	2.20736	3.07828	3.97428	3.23558	2.79793	4.92286	4.60945	5.15303	3.38372	3.76681	3.34748	5.19524	3.83849	5.80731	4.06349	5.79736	2.0425		13.5744	6.83661	12.1163	10.0553	16.8919	9.16187	13.764	8.36527	12.5509	15.5578	14.9054	10.9124	13.7973	10.1017	11.9147	9.77999	19.7344	9.42001	16.1124	11.9308		4.33183	5.92856	4.49928	4.04259	5.47863	3.98	4.48913	8.1004
3.68438	2.23962	3.07947	2.21094	3.10376	3.97548	3.23876	2.83257	4.9364	4.61184	5.1594	3.38053	3.76721	3.34389	5.17294	3.8353	5.80652	4.06946	5.87183	2.0405		13.5744	6.84468	12.1214	10.0512	16.9221	9.16893	13.7882	8.35721	12.9462	15.7978	14.9145	10.8861	13.8063	10.1006	11.8279	9.82637	19.805	9.4795	16.1608	11.9994		4.3166	5.16233	4.51619	4.06796	5.46849	3.96478	4.48237	8.12577
3.69752	2.23723	3.11292	2.2217	3.13363	3.97866	3.23836	2.89948	4.93958	4.61105	5.1594	3.55933	3.77159	3.34389	5.17493	3.83052	5.80612	4.07145	5.99567	2.0409		13.5936	6.87191	12.1214	9.98872	16.9201	9.17296	13.8396	8.35216	13.1761	16.1951	14.9256	10.8861	13.8981	10.1178	11.7876	9.92317	19.7737	9.64789	16.1608	12.0599		4.31153	5.11159	4.55848	4.09502	5.46172	3.95294	4.48237	8.16129
3.71783	2.23444	3.1408	2.23643	3.14399	3.99181	3.23319	3.05876	4.93918	4.6218	5.16298	3.67362	3.77079	3.35982	5.19843	3.80544	5.80771	4.07942	6.09961	2.04369		13.6389	6.94652	12.1093	9.95947	16.9131	9.14674	13.892	8.38342	13.3052	16.5642	14.9236	10.8942	14.2661	10.149	11.8269	10.0633	19.6901	9.72453	16.181	12.081		4.32506	5.05408	4.58554	4.10348	5.44311	3.95294	4.49251	8.2188
3.73376	2.23324	3.14677	2.2444	3.14359	4.02685	3.21129	3.26982	4.93878	4.62339	5.16537	3.67323	3.74331	3.42553	5.21515	3.79588	5.8097	4.09256	6.30828	2.04488		13.6752	6.96568	12.1184	9.99073	16.9151	9.16288	13.9304	8.44493	13.3153	16.7598	14.9236	10.9083	14.8631	10.1743	11.8743	10.2055	19.6477	9.74772	16.2828	12.1012		4.30307	4.8122	4.60246	4.10517	5.40083	3.97154	4.50435	8.23909
3.78672	2.22488	3.1404	2.22209	3.13522	4.07503	3.21168	3.33513	4.94038	4.61981	5.16856	3.67362	3.71823	3.47969	5.21595	3.79906	5.8097	4.10809	6.71925	2.05245		13.7115	6.95862	12.1809	9.9867	16.9292	9.22237	13.9576	8.53568	13.3778	16.8415	14.9236	10.9073	15.2483	10.2237	11.9036	10.3951	19.6507	9.78503	16.4653	12.2605		4.24049	4.6735	4.6346	4.10855	5.37038	3.98846	4.50774	8.21203
3.88229	2.21294	3.11412	2.18705	3.13164	4.10371	3.20452	3.33912	4.94197	4.63135	5.19086	3.65849	3.75088	3.51075	5.21754	3.79229	5.82683	4.11924	7.15331	2.06719		13.7519	6.95358	12.1809	9.97964	16.9362	9.24657	13.9606	8.58005	13.6319	16.908	14.9337	10.8619	15.4025	10.2811	11.9641	10.6532	19.6275	9.81326	16.6267	12.6266		4.23372	4.61092	4.64982	4.11024	5.36869	4.01891	4.51112	8.20527
3.94402	2.2213	3.07868	2.16913	3.13722	4.11167	3.19575	3.38969	4.94197	4.69268	5.22312	3.65212	3.79747	3.52748	5.21953	3.76362	5.87023	4.1276	7.6045	2.0644		13.8063	6.93947	12.5378	9.98267	16.9231	9.2264	13.9596	8.57501	14.0665	17.0008	14.9831	10.8095	15.455	10.2882	12.0105	10.9487	19.5277	9.94737	16.7608	12.9684		4.23034	4.5145	4.5348	4.10855	5.35854	4.06965	4.51112	8.20865
3.96074	2.25395	3.06434	2.154	3.14996	4.11406	3.19536	3.45978	4.94277	4.71657	5.23188	3.69075	3.81858	3.5231	5.19723	3.725	5.87939	4.1276	8.10308	2.0644		13.8608	6.93947	13.045	10.0149	16.9282	9.2012	13.9606	8.59013	14.6997	17.1349	15.0224	10.7934	15.4772	10.2973	12.0155	11.2814	19.3805	10.4152	16.8495	13.1963		4.20666	4.49759	4.41132	4.0984	5.3467	4.09333	4.50774	8.21372
3.95198	2.27785	3.0739	2.1321	3.15832	4.11406	3.16947	3.54858	4.94316	4.71777	5.23666	3.73814	3.81101	3.52509	5.19365	3.69592	5.87461	4.12402	8.42046	2.06719		13.8749	6.93947	13.2941	10.02	16.9978	9.17095	13.9485	8.59316	15.3935	17.3426	15.0184	10.7934	15.4903	10.3426	12.0216	11.5839	19.2534	10.8075	16.8818	13.3385		4.15084	4.48913	4.36904	4.09333	5.34163	4.07811	4.50605	8.21203
3.90101	2.26431	3.10217	2.12254	3.16429	4.11406	3.15553	3.62146	4.9348	4.73489	5.26214	3.77278	3.79588	3.51712	5.20838	3.68836	5.87461	4.12362	8.53595	2.06878		13.8739	6.9435	13.3909	10.022	17.0593	9.17498	13.9273	8.54879	15.8291	17.5806	15.0113	10.7863	15.4903	10.3416	12.0417	11.7876	19.2	10.8872	16.8737	13.4403		4.0595	4.48575	4.32337	4.09502	5.35178	4.07472	4.51112	8.20696
3.84805	2.27068	3.15394	2.11856	3.17186	4.11406	3.16668	3.64216	4.92843	4.77272	5.26214	3.77477	3.79309	3.53902	5.20798	3.71066	5.8774	4.12282	8.59409	2.07236		13.8769	6.98383	13.3858	10.024	17.0764	9.23649	13.9888	8.56392	15.9198	17.7671	15.0002	10.8256	15.4903	10.3477	12.1022	11.9641	19.1778	10.9517	16.8526	13.5542		3.97154	4.50097	4.28446	4.0984	5.38391	4.08149	4.57878	8.10547
3.80583	2.25793	3.17823	2.11816	3.1627	4.11565	3.18341	3.63739	4.93361	4.81613	5.24382	3.75566	3.79269	3.5661	5.20719	3.72261	5.88258	4.12919	8.61241	2.0632		13.8779	7.07559	13.3425	10.0109	17.0774	9.3827	14.0282	8.62543	15.9067	17.8952	14.9801	11.0122	15.4953	10.4263	12.2565	12.1436	19.1697	11.112	16.8485	13.6863		4.02567	4.49421	4.28616	4.09164	5.39914	4.09164	4.57201	7.87712
3.78035	2.23205	3.17544	2.11617	3.14837	4.11884	3.2085	3.61867	4.95232	4.83724	5.25059	3.75446	3.79229	3.61628	5.19564	3.72181	5.9009	4.13556	8.60843	2.05842		13.8588	7.13811	13.3485	10.0018	17.0734	9.48656	14.008	8.64156	15.9118	17.9859	14.9811	11.2401	15.5125	10.4929	12.3987	12.2615	19.1667	11.2875	16.8445	13.8275		4.1187	4.50097	4.28277	4.10517	5.38391	4.09671	4.48744	7.70459
3.76761	2.23205	3.15235	2.09227	3.15354	4.12003	3.24394	3.60752	4.95511	4.83764	5.26613	3.77716	3.80026	3.71424	5.1817	3.74371	5.92837	4.13556	8.60763	2.0628		13.8104	7.14013	13.404	10.0553	17.0643	9.54504	13.9999	8.65366	15.9158	18.0585	14.9811	11.5658	15.4772	10.4808	12.444	12.3382	19.0709	11.4538	16.8405	13.9798		4.12547	4.53649	4.28277	4.1982	5.34839	4.09671	4.44346	7.66231
3.76123	2.23444	3.14916	2.04926	3.15593	4.128	3.26106	3.60553	4.95312	4.85516	5.28962	3.77955	3.81181	3.82296	5.17652	3.77876	5.95306	4.13636	8.61002	2.06241		13.7438	7.16735	13.4564	10.1006	17.0562	9.64588	14.01	8.68795	15.9491	18.0858	14.9962	11.8985	15.4459	10.4213	12.4693	12.3725	18.8965	11.5254	16.8657	14.0977		4.11532	4.55679	4.28446	4.2963	5.32133	4.09502	4.42147	7.61156
3.75924	2.23763	3.15394	2.02896	3.16828	4.13118	3.24155	3.60593	4.9579	4.87507	5.30913	3.78114	3.80822	3.82535	5.18688	3.80982	5.97019	4.13636	8.61042	2.0648		13.6571	7.20466	13.4504	10.0916	17.0542	9.69629	14.0776	8.78475	15.9803	18.0918	15.0043	12.0095	15.4096	10.39	12.4753	12.2908	18.7936	11.467	16.9221	14.1451		4.10686	4.56186	4.29123	4.34536	5.32133	4.09502	4.41809	7.53883
3.75884	2.23723	3.21447	2.03373	3.21129	4.13318	3.20173	3.60593	4.94277	4.88224	5.30794	3.78075	3.80982	3.85601	5.11998	3.82455	5.96939	4.13636	8.614	2.0628		13.6248	7.20466	13.4181	10.0835	17.0613	9.661	14.1219	8.92793	15.9793	18.0868	14.9811	12.0276	15.3985	10.4425	12.4662	12.2091	18.6585	11.4236	16.9937	14.1835		4.12547	4.58724	4.29123	4.34705	5.32133	4.0984	4.40287	7.49824
3.76084	2.2428	3.2296	2.03453	3.23996	4.13636	3.17345	3.61548	4.92604	4.88104	5.32028	3.78075	3.81141	3.89623	4.95272	3.83092	5.96342	4.13636	8.6359	2.05962		13.7025	7.18954	13.4161	10.0643	17.0724	9.60454	14.123	9.05095	16.0933	18.0686	14.971	12.0276	15.4338	10.4515	12.4894	12.2565	18.3137	11.4357	17.0068	14.245		4.13054	4.62783	4.28954	4.35043	5.31964	4.10855	4.38595	7.49824
3.77517	2.22687	3.22482	2.04369	3.24155	4.13636	3.17306	3.62942	4.92405	4.88423	5.32148	3.7907	3.77557	3.89942	4.79264	3.84247	5.96421	4.13636	8.66497	2.07037		13.771	7.20567	13.4403	10.0815	17.0704	9.55412	14.128	9.10036	16.3161	18.0938	14.978	12.0155	15.4822	10.4546	12.5015	12.4309	17.9396	11.4407	17.0089	14.3075		4.12208	4.61261	4.28954	4.3369	5.31964	4.10517	4.38595	7.49316
3.80185	2.21771	3.22482	2.0405	3.23916	4.13915	3.16828	3.62942	4.92604	4.88741	5.32267	3.80504	3.74809	3.89942	4.6875	3.8584	5.97377	4.13636	8.67931	2.10263		13.7771	7.29037	13.4776	10.0855	17.0683	9.53193	14.1351	9.0933	16.4724	18.2148	14.9972	12.0195	15.4852	10.4536	12.4904	12.7375	17.7702	11.4407	17.0129	14.4063		4.11532	4.54664	4.2963	4.32168	5.32809	4.09671	4.37919	7.49485
3.82296	2.23086	3.23916	2.04767	3.24832	4.13995	3.16947	3.64376	4.93201	4.88502	5.3167	3.82057	3.75048	3.93008	4.65644	3.86676	5.98651	4.13636	8.67453	2.109		13.7731	7.38112	13.4978	10.0563	17.0774	9.54807	14.1189	9.07213	16.5813	18.3842	15.0325	12.0236	15.4842	10.4889	12.4935	13.0783	17.6764	11.4518	17.027	14.5525		4.12716	4.46883	4.34874	4.32168	5.40083	4.09333	4.37073	7.49824
3.84526	2.25674	3.24912	2.05165	3.2523	4.13875	3.16947	3.67203	4.95551	4.88263	5.30874	3.87234	3.75168	3.95159	4.65644	3.86437	5.99528	4.13636	8.67095	2.10024		13.761	7.41037	13.4917	10.0139	17.0956	9.64991	14.1441	9.05095	16.663	18.4962	15.0668	12.0044	15.4752	10.5292	12.4814	13.2991	17.6582	11.4791	16.9786	14.6402		4.13054	4.43162	4.48237	4.33013	5.47525	4.0984	4.3572	7.49654
3.88269	2.29258	3.2519	2.0421	3.24991	4.13915	3.16987	3.69075	4.99374	4.89458	5.31033	3.9038	3.75407	3.94521	4.6879	3.85004	5.99169	4.14154	8.66736	2.10024		13.7589	7.39726	13.4655	9.99477	17.1117	9.68722	14.2601	9.09229	16.6942	18.5536	15.1061	11.959	15.4792	10.5685	12.4814	13.3919	17.6885	11.4992	16.8042	14.6715		4.139	4.43331	4.60415	4.34367	5.53107	4.08995	4.35551	7.47117
3.92769	2.29258	3.25509	1.9959	3.24951	4.13915	3.17027	3.7011	5.02839	4.90573	5.30834	3.88986	3.75765	3.93247	4.74246	3.86995	5.98572	4.14472	8.66617	2.10303		13.771	7.36398	13.4605	9.99275	17.1329	9.50269	14.4063	9.34035	16.7023	18.6162	15.1414	11.9449	15.4842	10.5998	12.4814	13.4766	17.6925	11.4992	16.543	14.7028		4.23203	4.42824	4.58554	4.34028	5.5852	4.09164	4.39272	7.44073
3.98623	2.28103	3.28894	1.96365	3.2758	4.13198	3.16828	3.69712	5.05984	4.90573	5.29241	3.9038	3.75486	3.91535	4.76357	3.9026	5.9678	4.14472	8.66497	2.10462		13.7831	7.3539	13.4897	9.99376	17.153	9.3464	14.4981	9.60454	16.7084	18.6666	15.1505	11.9661	15.4661	10.5887	12.5146	13.7398	17.7308	11.4962	16.4442	14.737		4.36904	4.3961	4.53988	4.3369	5.59873	4.09164	4.42655	7.44918
4.04397	2.26988	3.43708	1.96285	3.29133	4.12561	3.17106	3.70548	5.08175	4.90613	5.28166	3.92092	3.75845	3.91535	4.75839	3.90499	5.95585	4.14034	8.67334	2.10462		13.7519	7.34281	13.5805	9.99376	17.1218	9.3464	14.5646	9.76688	16.7154	18.6867	15.1575	12.0044	15.4136	10.5897	12.5721	14.1441	17.872	11.5214	16.5531	14.7643		4.46714	4.31322	4.53311	4.33352	5.59365	4.09164	4.41809	7.505
4.07742	2.28501	3.63539	1.96404	3.29969	4.13079	3.13005	3.72022	5.10524	4.90573	5.28205	3.94083	3.76322	3.91654	4.75879	3.88827	5.95386	4.13636	8.68289	2.10502		13.6964	7.34684	13.6682	9.9867	17.0683	9.50874	14.6907	9.82738	16.7275	18.7099	15.1817	12.0296	15.3511	10.5816	12.5741	14.3851	18.0192	11.6959	16.6489	14.7834		4.55341	4.23203	4.51958	4.33013	5.59535	4.10179	4.3961	7.5845
4.08698	2.32484	3.72022	1.96086	3.33354	4.18256	3.01775	3.72539	5.15821	4.90374	5.2932	3.95875	3.75645	3.91535	4.75918	3.86995	5.95227	4.14353	8.68648	2.10661		13.7156	7.35591	13.6631	9.95947	17.0391	9.84856	14.8933	9.84452	16.7225	18.7251	15.1858	12.0528	15.3057	10.5786	12.559	14.5132	18.0122	11.9772	16.6418	14.7885		4.62445	4.23541	4.52296	4.35212	5.6241	4.10517	4.38764	7.63863
4.08539	2.32802	3.72898	1.96604	3.365	4.24627	2.96677	3.73853	5.20639	4.90414	5.29679	3.96035	3.74172	3.91734	4.75719	3.87075	5.93514	4.14353	8.68568	2.10103		13.7952	7.366	13.6601	9.91511	17.03	10.0835	14.9478	9.84654	16.6892	18.7251	15.1958	12.0589	15.2997	10.625	12.554	14.6513	17.9869	12.2585	16.5823	14.7885		4.68534	4.14238	4.54157	4.36058	5.69514	4.09502	4.39272	7.65216
4.09176	2.32762	3.72778	2.07754	3.34111	4.28092	2.97593	3.75805	5.22431	4.8902	5.29759	3.96114	3.73734	3.91216	4.76357	3.90141	5.86506	4.14552	8.67971	2.09426		13.8305	7.366	13.6571	9.87679	17.028	10.1511	14.9609	9.84553	16.6721	18.721	15.211	12.073	15.2846	10.874	12.5933	14.8137	18.1059	12.4975	16.5581	14.7864		4.73947	4.0595	4.52296	4.36565	5.72897	4.09502	4.40794	7.65216
4.10968	2.30811	3.72858	2.19502	3.28814	4.30162	2.96319	3.77517	5.23148	4.88025	5.29002	3.96951	3.73017	3.90738	4.76516	3.90499	5.77386	4.15149	8.6602	2.09665		13.764	7.37306	13.6561	9.83141	17.0331	10.1622	15.1505	9.85158	16.6771	18.72	15.212	12.1375	15.2543	11.2058	12.6215	14.9528	18.0787	12.6498	16.5622	14.8268		4.7733	4.07472	4.47222	4.38934	5.73743	4.1001	4.42486	7.65385
4.11924	2.30891	3.73734	2.26072	3.28575	4.30003	2.9377	3.82336	5.2279	4.89339	5.26254	3.96154	3.72101	3.88588	4.76357	3.91973	5.70815	4.15747	8.64427	2.11258		13.6248	7.3902	13.6642	9.79108	17.03	10.1642	15.3945	9.95847	16.6801	18.6827	15.215	12.2041	15.2452	11.4821	12.6377	15.0264	17.9869	12.6366	16.5531	14.9528		4.78006	4.12378	4.44008	4.4164	5.73235	4.11024	4.45192	7.67584
4.10052	2.3109	3.74451	2.32205	3.28297	4.29924	2.93293	3.90619	5.23188	4.90095	5.24183	3.97548	3.76322	3.87313	4.76197	3.93088	5.66355	4.16503	8.64666	2.13568		13.5311	7.40936	13.5916	9.76385	17.025	10.1803	15.6496	10.1611	16.6428	18.596	15.2362	12.2162	15.2059	11.6132	12.6588	15.0395	17.9779	12.6608	16.5198	15.1041		4.78006	4.14577	4.38595	4.43162	5.7239	4.13054	4.46883	7.68261
4.09654	2.32762	3.74172	2.34913	3.28376	4.31477	2.93173	3.94442	5.24582	4.90016	5.23825	4.01411	3.77637	3.86955	4.7548	3.93765	5.61298	4.17379	8.65143	2.13528		13.5613	7.41944	13.5361	9.75478	17.0401	10.3195	15.823	10.26	16.5843	18.5748	15.2634	12.2646	15.1646	11.6001	12.6588	15.0325	17.988	12.7143	16.5158	15.22		4.79359	4.15084	4.31999	4.42486	5.72728	4.14069	4.48067	7.70121
4.14672	2.32962	3.74371	2.34873	3.28257	4.3522	2.89191	3.93765	5.23944	4.90135	5.24104	4.00375	3.76084	3.85601	4.72892	3.94999	5.58869	4.16742	8.65422	2.17271		13.649	7.43457	13.524	9.76789	17.0704	10.507	15.8603	10.2529	16.5632	18.6071	15.2694	12.3019	15.1979	11.5789	12.7334	15.0587	17.9849	12.7224	16.6731	15.2513		4.80374	4.15591	4.31491	4.48067	5.72559	4.13223	4.47391	7.71136
4.20446	2.31807	3.76004	2.35271	3.26505	4.38565	2.80629	3.94641	5.21555	4.90932	5.23666	4.00495	3.74132	3.83451	4.71498	3.96313	5.58232	4.173	8.65741	2.22528		13.6793	7.44667	13.523	9.79814	17.1016	10.5796	15.823	10.2479	16.5773	18.6202	15.2684	12.2787	15.212	11.6112	12.7667	15.1585	17.9799	12.5822	16.9564	15.2513		4.80374	4.1593	4.3166	4.70395	5.70867	4.11532	4.46714	7.73335
4.21202	2.31807	3.76641	2.3547	3.26465	4.40556	2.76487	3.97707	5.23984	4.89458	5.23148	4.07065	3.74969	3.82893	4.71976	3.97468	5.56997	4.20963	8.66935	2.22807		13.6642	7.44767	13.521	9.85965	17.153	10.6028	15.8845	10.3779	16.5773	18.6031	15.2735	12.2726	15.1989	11.7049	12.7617	15.2694	17.9022	12.3593	17.2317	15.2432		4.80036	4.16437	4.33183	4.9306	5.69176	4.09502	4.46207	7.73842
4.1726	2.33917	3.76561	2.37461	3.24235	4.42189	2.77125	4.00773	5.28564	4.87109	5.26334	4.21003	3.73973	3.82535	4.71737	3.98464	5.54369	4.27932	8.72112	2.24718		13.648	7.44667	13.528	9.90603	17.2226	10.5968	15.9884	10.6704	16.6015	18.598	15.2926	12.2555	15.1999	11.9368	12.7768	15.3007	17.7823	12.197	17.4031	15.2442		4.79867	4.16268	4.33352	5.02363	5.69007	4.05781	4.45023	7.70121
4.14592	2.32882	3.75606	2.38855	3.21686	4.43941	2.7589	4.03442	5.31232	4.84879	5.3159	4.33946	3.75566	3.82774	4.69427	3.98066	5.52776	4.32711	8.78564	2.28382		13.643	7.44364	13.5411	9.89797	17.2569	10.5968	15.9914	10.9386	16.6781	18.6323	15.2876	12.4219	15.2049	12.1516	12.8091	15.3068	17.7066	12.1678	17.4797	15.2463		4.80036	4.15422	4.30815	5.03716	5.68838	4.02736	4.44515	7.67246
4.13278	2.32762	3.75685	2.39293	3.21009	4.44578	2.75213	4.06787	5.31232	4.82967	5.3159	4.45892	3.77238	3.82336	4.66958	3.98464	5.51263	4.34862	8.80754	2.28382		13.643	7.45574	13.5603	9.87881	17.2821	10.6058	15.9924	11.11	16.7265	18.6676	15.2836	12.9412	15.2049	12.2746	12.917	15.3178	17.6643	12.2131	17.5261	15.216		4.79698	4.15253	4.30476	5.03378	5.6833	3.99523	4.45361	7.67415
4.12601	2.3105	3.75606	2.39015	3.21009	4.4426	2.74218	4.08459	5.30874	4.81812	5.3159	4.5549	3.78035	3.79827	4.63693	3.993	5.49192	4.35021	8.78683	2.28342		13.643	7.4507	13.5805	9.85259	17.3255	10.5968	15.9904	11.2744	16.7457	18.7019	15.2836	13.6642	15.1878	12.3977	13.1892	15.332	17.629	12.316	17.5453	15.1726		4.78852	4.15084	4.30476	5.03547	5.663	3.96647	4.46883	7.67922
4.12402	2.27466	3.76044	2.39572	3.20452	4.41193	2.77204	4.09017	5.31192	4.81374	5.32068	4.57082	3.80145	3.79946	4.59671	3.99419	5.48156	4.34901	8.73944	2.28422		13.642	7.42852	13.5976	9.83141	17.3194	10.5847	15.9602	11.4922	16.7497	18.7251	15.2815	14.2278	15.1797	12.5096	13.5361	15.3713	17.633	12.4088	17.4273	15.1303		4.79021	4.15253	4.30815	5.03716	5.64778	3.96309	4.48237	7.67753
4.12242	2.26869	3.77119	2.4455	3.21965	4.35021	2.77921	4.09893	5.33104	4.81573	5.31232	4.58874	3.78274	3.79986	4.57282	3.9922	5.47081	4.35459	8.70918	2.27705		13.6248	7.45877	13.6117	9.86872	17.3285	10.5867	15.8855	11.6596	16.7316	18.7452	15.2805	14.4406	15.1837	12.5489	13.8436	15.4852	17.6653	12.4834	17.1752	15.1031		4.7919	4.14238	4.2963	5.03547	5.64609	3.96309	4.49082	7.67922
4.12242	2.26749	3.76283	2.48532	3.23279	4.26977	2.76527	4.1057	5.36648	4.81295	5.29798	4.66998	3.7469	3.80822	4.56804	4.00535	5.43975	4.36215	8.7032	2.2655		13.6258	7.49406	13.6158	9.96552	17.3325	10.5393	15.8613	11.6868	16.6549	18.7997	15.2795	14.5565	15.1656	12.563	13.9858	15.5941	17.6471	12.5509	16.8818	15.0859		4.79021	4.11701	4.25064	5.06084	5.63932	3.9597	4.47729	7.6843
4.12242	2.26829	3.79588	2.49448	3.23478	4.16702	2.77164	4.11406	5.38241	4.81613	5.28922	4.75918	3.73336	3.80145	4.56565	4.04318	5.41307	4.36813	8.70281	2.2659		13.6551	7.54548	13.6147	9.98973	17.3305	10.3759	15.824	11.6313	16.6136	18.9045	15.2775	14.7229	15.1646	12.6094	14.007	15.6899	17.6381	12.5661	16.6055	15.0688		4.78683	4.10855	4.22695	5.06592	5.6241	3.9597	4.45192	7.68261
4.1268	2.27347	3.80424	2.4893	3.2312	4.06428	2.77324	4.12441	5.3832	4.81295	5.28643	4.82768	3.74849	3.78791	4.55808	4.04716	5.41705	4.35977	8.70599	2.2655		13.7267	7.56767	13.6208	9.99275	17.3295	10.2509	15.8896	11.6263	16.6267	18.9893	15.2725	14.9629	15.1767	12.685	14.0292	15.814	17.6602	12.5439	16.4462	15.0345		4.82235	4.09164	4.23034	5.04731	5.62072	3.97154	4.4553	7.67584
4.1276	2.28701	3.80464	2.46541	3.20571	3.98782	2.76487	4.1276	5.3832	4.83126	5.28643	4.86949	3.90778	3.76681	4.53817	4.05034	5.43816	4.35021	8.71117	2.26192		13.9142	7.57069	13.64	9.99275	17.3214	10.2791	15.936	11.712	16.7033	19.0185	15.2735	15.3158	15.1797	12.6881	14.0998	15.9077	17.6602	12.5005	16.3726	14.975		4.89677	4.07811	4.22865	5.06761	5.62579	3.97324	4.47222	7.63355
4.13955	2.3109	3.82734	2.46461	3.18102	3.95875	2.73262	4.11844	5.39157	4.82131	5.29759	4.89179	4.08937	3.7465	4.48401	4.05114	5.45329	4.35419	8.71117	2.26431		14.1159	7.66447	13.7015	10.0018	17.3073	10.2932	15.8261	11.9016	16.7981	19.0165	15.2715	15.7686	15.1847	12.6356	14.1058	15.9128	17.6582	12.4511	16.3726	14.9145		4.92891	4.09333	4.22526	5.09636	5.62748	3.97831	4.47729	7.47794
4.19092	2.30891	3.89424	2.46382	3.16429	3.96035	2.7378	4.09654	5.41307	4.76834	5.31312	4.90374	4.17499	3.75645	4.4191	4.05154	5.46404	4.36972	8.71316	2.26431		14.1875	7.94681	13.7983	9.99981	17.3043	10.2902	15.7484	12.202	16.8102	19.0074	15.2795	16.2788	15.1837	12.6054	14.2187	15.9077	17.63	12.4531	16.5753	14.8832		4.93398	4.06627	4.2185	5.09467	5.64947	3.96478	4.34536	7.28173
4.22636	2.31687	3.95318	2.46222	3.13443	3.9472	2.77762	4.09295	5.43139	4.74405	5.32626	4.93998	4.2391	3.75805	4.39481	4.04437	5.46882	4.37331	8.69524	2.27108		14.1875	8.22511	13.9132	9.99275	17.3164	10.2862	15.7585	12.4551	16.8142	19.0014	15.2846	16.7769	15.1767	12.5882	14.5455	15.9299	17.6048	12.5308	16.5954	14.8752		4.93398	4.04089	4.20666	5.09467	5.65793	3.94617	4.05443	7.20054
4.23273	2.32245	3.99698	2.46103	3.12168	3.88588	2.80908	4.12641	5.44652	4.73967	5.36767	4.98856	4.15826	3.75606	4.38326	4.04357	5.44373	4.37092	8.64148	2.28262		14.1885	8.35418	14.1351	10.0149	17.3285	10.2801	15.8099	12.6114	16.8344	18.9953	15.2896	17.152	15.1787	12.6316	14.9185	15.944	17.6028	12.6679	16.3312	14.8742		4.93737	4.02398	4.20666	5.09129	5.66469	3.93772	3.9208	7.22422
4.23831	2.33001	4.0157	2.47417	3.12447	3.76561	2.82063	4.18096	5.45966	4.72773	5.41188	5.01246	4.06946	3.73415	4.39521	4.04716	5.40112	4.37848	8.58095	2.3551		14.1835	8.43485	14.2772	10.0492	17.3245	10.3043	15.8755	12.7314	16.8344	18.9913	15.2967	17.4233	15.1706	12.7284	15.2019	15.9652	17.6139	12.8212	16.2213	14.8893		4.94413	3.98677	4.20835	5.08791	5.68838	3.93772	3.91911	7.27327
4.23791	2.33798	4.02008	2.4897	3.12208	3.67721	2.83456	4.20884	5.46364	4.72534	5.41865	5.01325	4.04915	3.69274	4.45574	4.05393	5.33064	4.39481	8.53913	2.40249		14.1562	8.54577	14.248	10.0896	17.3325	10.3477	15.942	12.8393	16.8405	18.9963	15.3027	17.6038	15.1747	12.7607	15.2836	15.9773	17.7006	12.9865	16.1497	14.8832		4.94583	3.95125	4.21173	5.08622	5.70529	3.93772	3.92926	7.31556
4.23034	2.34077	4.03919	2.50563	3.12208	3.66924	2.8497	4.22636	5.45648	4.71777	5.42024	5.01285	4.05473	3.65969	4.48322	4.05154	5.23825	4.40875	8.51683	2.42638		14.1492	8.52963	14.3881	10.0966	17.3719	10.3447	16.0015	12.9523	16.8435	19.0003	15.3118	17.6774	15.218	12.7637	15.2866	15.9884	17.8266	13.0944	16.1003	14.852		4.94752	3.77026	4.21173	5.11159	5.72051	3.93095	3.9411	7.33247
4.22596	2.40249	4.06906	2.51678	3.12726	3.67123	2.86881	4.23114	5.45488	4.69069	5.42542	5.01166	4.0384	3.65411	4.48322	4.07942	5.16896	4.40516	8.51285	2.4455		14.1754	8.46207	14.7038	10.1017	17.3809	10.3558	16.059	13.0682	16.8556	18.9993	15.3138	17.7933	15.2957	12.8383	15.2745	16.0338	17.878	13.1267	16.1669	14.8631		4.94752	3.70768	4.1982	5.13358	5.72559	3.90558	3.93602	7.32571
4.22477	2.43873	4.0834	2.51678	3.12845	3.66646	2.87797	4.23114	5.46086	4.66281	5.42621	5.01445	4.01809	3.68	4.47963	4.10012	5.14268	4.41114	8.51564	2.44868		14.1542	8.49132	15.0849	10.1017	17.3416	10.4213	16.1155	13.1328	16.9312	18.9983	15.3057	18.1584	15.3552	12.9805	15.2422	16.1023	17.7006	13.1267	16.2849	14.9085		4.94583	3.69584	4.19989	5.14034	5.70698	3.88021	3.89374	7.30203
4.22477	2.43873	4.09375	2.52036	3.12288	3.66685	2.87917	4.22755	5.46484	4.63932	5.43378	5.03675	4.00296	3.723	4.47764	4.10689	5.15024	4.40238	8.51007	2.44868		14.1179	8.52661	15.3189	10.1097	17.3275	10.4586	16.182	13.158	17.0653	19.0145	15.3168	18.4589	15.3794	12.8867	15.211	16.1538	17.2962	13.1499	16.3817	14.9256		4.93737	3.67385	4.18129	5.13358	5.6833	3.86837	3.82946	7.2868
4.22755	2.44669	4.10809	2.52435	3.12567	3.67362	2.87518	4.21003	5.46484	4.60627	5.46683	5.07617	3.95636	3.73933	4.47485	4.1049	5.15223	4.38286	8.49334	2.44868		14.124	8.60022	15.3743	10.1047	17.3446	10.4203	16.2546	13.16	17.0925	19.0729	15.3552	18.5657	15.3995	12.7143	15.2019	16.2284	16.9806	13.2134	16.4169	14.9195		4.93737	3.67554	4.16437	5.09467	5.65116	3.83454	3.77534	7.29864
4.23114	2.45306	4.11088	2.52435	3.13164	3.67203	2.87279	4.19729	5.44931	4.58078	5.50267	5.10007	3.8807	3.75845	4.47167	4.09335	5.15223	4.31118	8.48099	2.45386		14.1381	8.71215	15.3824	10.145	17.39	10.391	16.2415	13.162	17.0794	19.1092	15.3834	18.6978	15.4056	12.5005	15.2039	16.3232	16.8062	13.284	16.42	14.9266		4.93568	3.65863	4.16606	5.0896	5.63594	3.79394	3.7618	7.3071
4.23552	2.46023	4.11088	2.52395	3.12607	3.67163	2.86881	4.20804	5.44373	4.59432	5.5405	5.08772	3.86318	3.79747	4.45056	4.06906	5.15223	4.19689	8.47502	2.45227		14.1199	8.76559	15.3693	10.1642	17.4253	10.4052	16.1356	13.1449	17.0784	19.1092	15.4227	18.8319	15.3229	12.2656	15.218	16.3635	16.5904	13.3374	16.421	14.9327		4.93568	3.65693	4.15084	5.10144	5.63594	3.7618	3.77872	7.29695
4.26339	2.50842	4.11446	2.55063	3.12806	3.67362	2.86244	4.21202	5.43895	4.59751	5.60223	5.06741	3.90619	3.83769	4.41472	4.04357	5.14706	4.13636	8.47622	2.44789		14.1048	8.81802	15.341	10.1672	17.4021	10.4183	16.0055	13.1207	17.0673	19.1062	15.4983	18.8783	15.2442	12.1597	15.2644	16.3645	16.3988	13.3697	16.4301	14.9125		4.93229	3.66032	4.14069	5.1082	5.63594	3.71444	3.80578	7.2885
4.28132	2.57174	4.12959	2.62589	3.14876	3.678	2.86363	4.2184	5.44413	4.5772	5.67271	5.06701	3.96114	3.86836	4.38565	4.04756	5.14666	4.08937	8.47861	2.43992		14.1169	8.89567	15.3017	10.1732	17.3537	10.4253	15.8311	13.1227	17.0956	19.1032	15.5467	18.9035	15.2331	12.192	15.3128	16.3635	16.3968	13.4111	16.4422	14.9135		4.94413	3.65863	4.13392	5.1082	5.63932	3.66708	3.82777	7.29019
4.27932	2.62589	4.15189	2.68045	3.21009	3.66446	2.81107	4.25702	5.4509	4.54733	5.74041	5.0702	4.03083	3.88867	4.36534	4.05831	5.15542	4.05473	8.46905	2.42718		14.127	9.01768	15.3007	10.1743	17.3719	10.4263	15.5992	13.0642	17.1621	19.0992	15.5609	18.9298	15.2251	12.2827	15.3068	16.3534	16.3534	13.5159	16.419	14.9105		4.9103	3.65863	4.13392	5.10482	5.66639	3.66201	3.83961	7.29526
4.27932	2.6685	4.16941	2.68523	3.30009	3.65093	2.76049	4.29764	5.46086	4.54335	5.7655	5.07338	4.11804	3.88787	4.34423	4.07862	5.09529	4.04477	8.46427	2.4005		14.134	9.21027	15.2694	10.1874	17.4747	10.4132	15.4358	13.0148	17.1783	19.08	15.5639	18.8551	15.2221	12.2978	15.2533	16.3353	16.1447	13.6793	16.3796	14.854		4.88662	3.6637	4.13392	5.1082	5.68161	3.66032	3.83115	7.30372
4.26977	2.68802	4.19171	2.68244	3.38451	3.66446	2.76567	4.31875	5.48156	4.54414	5.74081	5.07338	4.17379	3.89862	4.35339	4.12641	4.95073	4.04318	8.47144	2.36386		14.1451	9.46135	15.0829	10.3437	17.5796	10.4021	15.4388	13.0097	17.1752	19.0568	15.5578	18.6837	15.2634	12.2807	15.1757	16.3907	15.7625	13.766	16.3413	14.7542		4.90692	3.66708	4.14238	5.11159	5.68161	3.66032	3.82439	7.29695
4.23114	2.68762	4.23313	2.67448	3.46296	3.65093	2.7589	4.33348	5.49311	4.53976	5.66873	5.07538	4.1953	3.96274	4.37171	4.17061	4.81374	4.04278	8.47502	2.33121		14.1451	9.69932	14.9347	10.5877	17.6199	10.4092	15.4479	13.1711	17.1803	19.0568	15.5478	18.6051	15.2775	12.2837	15.1273	16.5087	15.3068	13.7226	16.3423	14.6917		4.9103	3.65863	4.16268	5.11159	5.67823	3.66708	3.80071	7.27835
4.18933	2.69439	4.26061	2.67448	3.51553	3.60712	2.74058	4.33348	5.48833	4.531	5.54249	5.08095	4.20725	4.04119	4.39083	4.18256	4.68631	4.04079	8.47502	2.32205		14.1482	9.92922	14.8207	10.7178	17.625	10.4606	15.342	13.8235	17.1974	19.0699	15.5357	18.592	15.2483	12.2888	15.1031	16.5823	14.9236	13.7166	16.3504	14.6997		4.88832	3.6434	4.17959	5.11159	5.64778	3.67047	3.78548	7.30203
4.16025	2.72187	4.26977	2.6697	3.53863	3.51911	2.71231	4.32512	5.48356	4.52423	5.37086	5.09051	4.20645	4.09017	4.43742	4.19052	4.59273	4.03999	8.47104	2.33559		14.1754	10.2126	14.6584	10.7541	17.6229	10.504	15.2221	14.2621	17.2004	19.0891	15.5387	18.5819	15.2059	12.2212	15.089	16.5783	14.6584	13.7368	16.3363	14.7078		4.84434	3.63664	4.18129	5.11159	5.63256	3.66708	3.83454	7.33924
4.15627	2.74178	4.28928	2.67368	3.56172	3.46177	2.71151	4.32233	5.48316	4.53897	5.19683	5.10445	4.20565	4.10888	4.45932	4.1941	4.57361	4.02884	8.4567	2.3563		14.2187	10.4879	14.5202	10.7934	17.6169	10.5282	15.2493	14.3559	17.1813	19.1133	15.5427	18.5819	15.1515	12.0931	15.0869	16.5259	14.5051	13.7771	16.3474	14.6654		4.75469	3.63833	4.16268	5.11666	5.64609	3.67554	3.88021	7.33924
4.15587	2.74974	4.34423	2.66811	3.59358	3.45739	2.6924	4.32074	5.48356	4.53777	5.01763	5.11679	4.20565	4.11088	4.43822	4.18614	4.57481	3.98981	8.45391	2.36227		14.251	10.6159	14.4577	10.9214	17.6209	10.5554	15.0738	14.3902	17.1742	19.1667	15.5397	18.5839	15.1646	11.9893	15.1192	16.4472	14.4678	13.8517	16.3726	14.616		4.64813	3.61634	4.14407	5.10144	5.68838	3.67554	3.92249	7.33924
4.15986	2.76965	4.4203	2.67448	3.6115	3.48367	2.66532	4.31755	5.48356	4.53777	4.82808	5.1152	4.20127	4.11526	4.41233	4.19132	4.57839	3.97787	8.45471	2.37023		14.2792	10.6391	14.4335	11.0808	17.6582	10.5605	14.853	14.4113	17.1893	19.203	15.5397	18.6202	15.2775	11.9137	15.1817	16.4028	14.492	13.9788	16.4028	14.5858		4.59908	3.61634	4.13562	5.07099	5.7036	3.67554	4.02229	7.33586
4.17141	2.78041	4.4876	2.67806	3.59239	3.53703	2.66452	4.31954	5.48276	4.53419	4.65963	5.11878	4.19092	4.14871	4.38446	4.2164	4.57082	3.98583	8.46108	2.41125		14.3105	10.6623	14.4577	11.1241	17.6794	10.5574	14.859	14.4013	17.2014	19.2413	15.5316	18.7109	15.3249	11.8834	15.2241	16.425	14.4769	14.2046	16.4079	14.5586		4.58047	3.61634	4.139	5.05915	5.71375	3.66877	4.11701	7.34093
4.17539	2.80987	4.50074	2.67209	3.58522	3.54141	2.65855	4.32552	5.47997	4.52383	4.59113	5.13153	4.2184	4.18574	4.34782	4.22517	4.57242	3.9707	8.46307	2.43992		14.3065	10.7288	14.5465	11.1725	17.6754	10.5584	14.8843	14.3992	17.2025	19.3079	15.5256	18.7785	15.3299	11.8844	15.2483	16.4694	14.4517	14.489	16.423	14.5555		4.56356	3.59942	4.13054	5.04393	5.74419	3.63664	4.12547	7.36123
4.17459	2.94846	4.49994	2.66731	3.60115	3.55615	2.62908	4.32631	5.47878	4.51109	4.61861	5.13471	4.263	4.20844	4.32154	4.22915	4.5764	3.9707	8.45073	2.43634		14.2984	10.8962	14.5949	11.3369	17.628	10.5594	14.8701	14.4093	17.2014	19.4047	15.5357	18.7956	15.331	11.8844	15.2745	16.5107	14.4224	14.7098	16.4422	14.5465		4.55848	3.58589	4.12716	5.00503	5.77633	3.60957	4.11701	7.37814
4.17061	3.02292	4.50153	2.6701	3.60155	3.57606	2.60479	4.33388	5.47997	4.51109	4.65166	5.13511	4.3072	4.23233	4.35061	4.25185	4.5756	4.02406	8.44197	2.44789		14.3055	11.1564	14.5928	11.592	17.5594	10.5998	14.8157	14.4002	17.1954	19.5489	15.5518	18.8279	15.337	11.8653	15.2896	16.538	14.3801	14.8379	16.4018	14.5344		4.56694	3.58082	4.12547	5.00333	5.78479	3.59773	4.10348	7.3866
4.1718	3.0285	4.49277	2.65855	3.62584	3.59	2.58368	4.34543	5.48794	4.51229	4.68073	5.1383	4.32711	4.25941	4.4199	4.25702	4.56485	4.04636	8.43838	2.4447		14.3085	11.3752	14.5999	11.84	17.5201	10.621	14.8147	14.3871	17.1803	19.7052	15.5609	18.8703	15.3541	11.8521	15.2553	16.5571	14.3599	14.9195	16.425	14.5323		4.58216	3.58082	4.12378	5.00841	5.77971	3.56221	4.09502	7.39844
4.19809	3.02332	4.49198	2.65178	3.62066	3.61309	2.54505	4.34901	5.49152	4.51985	4.68711	5.1371	4.3303	4.26419	4.44061	4.25543	4.52941	3.99619	8.44077	2.45585		14.3135	11.5436	14.6029	12.0155	17.4969	10.625	14.8449	14.3942	17.1712	19.8857	15.576	18.8773	15.3582	11.8753	15.1626	16.5692	14.373	14.9659	16.5289	14.4769		4.59062	3.58251	4.12547	5.02025	5.8017	3.47764	4.09164	7.39167
4.23472	3.03009	4.49397	2.62669	3.60792	3.64296	2.53152	4.34623	5.49829	4.52344	4.67755	5.1363	4.3303	4.25981	4.44021	4.26379	4.51029	3.96393	8.44953	2.44948		14.3639	11.71	14.6503	12.1516	17.4787	10.6552	14.8318	14.3892	17.1762	20.1478	15.6204	18.8612	15.4126	11.9197	15.1021	16.5864	14.374	15.0174	16.5914	14.366		4.58724	3.56221	4.12885	5.0304	5.822	3.37615	4.0595	7.38153
4.24388	3.03965	4.49954	2.60559	3.60792	3.66725	2.53311	4.34025	5.49949	4.52224	4.67078	5.12993	4.33109	4.25901	4.45534	4.26937	4.51866	3.92889	8.44953	2.45068		14.3942	11.8017	14.731	12.314	17.4908	10.6915	14.7985	14.3518	17.2045	20.4503	15.6435	18.844	15.4257	11.9288	15.096	16.5813	14.374	15.091	16.5732	14.2329		4.57878	3.54191	4.12716	5.00333	5.78141	3.34571	4.01045	7.33078
4.22477	3.03965	4.49556	2.59682	3.60832	3.69115	2.52156	4.34423	5.49431	4.52144	4.6652	5.12635	4.3526	4.26379	4.486	4.26738	4.54852	3.9042	8.45471	2.45028		14.3922	11.8451	14.8227	12.5348	17.4737	10.7097	14.8106	14.3196	17.2498	20.7105	15.6244	18.8531	15.4358	11.9278	15.0879	16.5884	14.3498	15.1696	16.5218	14.13		4.57878	3.54361	4.13392	5.00333	5.71713	3.36093	3.96309	7.24621
4.14711	3.04562	4.46529	2.59682	3.60354	3.69473	2.51439	4.37331	5.4951	4.54056	4.66281	5.12476	4.40875	4.27056	4.48043	4.27056	4.60109	3.94641	8.4579	2.48094		14.3932	11.8824	14.8953	12.7657	17.4576	10.6452	14.8167	14.3075	17.2761	20.9263	15.6042	18.8975	15.5881	11.9308	15.0476	16.5894	14.3276	15.2261	16.4946	14.0957		4.55679	3.55206	4.14746	5.01179	5.69683	3.34401	3.9597	7.18701
4.05911	3.04841	4.42149	2.60081	3.59995	3.69473	2.50722	4.39919	5.49431	4.56445	4.66719	5.12515	4.44578	4.27056	4.41392	4.28211	4.66321	3.96353	8.46427	2.51837		14.3912	11.8733	14.9216	12.9593	17.4142	10.5867	14.8369	14.3004	17.2791	21.1249	15.5972	18.9338	15.9319	11.8915	14.9659	16.5702	14.2913	15.2553	16.6731	14.0867		4.53142	3.56052	4.14915	5.00841	5.71544	3.32541	3.96309	7.13965
4.03083	3.04642	4.3968	2.6024	3.59995	3.69632	2.50563	4.38645	5.4955	4.5549	4.66998	5.12276	4.45733	4.2837	4.2841	4.2853	4.7345	3.92809	8.46706	2.54346		14.3902	11.7886	14.9206	13.0864	17.1722	10.7016	14.853	14.3115	17.274	21.3589	15.6335	18.8582	16.2768	11.7906	14.8782	16.5632	14.2066	15.2785	17.0341	14.0544		4.52634	3.56898	4.14746	5.00672	5.73404	3.32541	3.94956	7.10074
4.02804	3.04682	4.37251	2.64182	3.59876	3.69792	2.5132	4.40556	5.49351	4.55211	4.66879	5.13113	4.4645	4.31636	4.13118	4.2853	4.80458	3.90181	8.4583	2.58806		14.3841	11.7604	14.9206	13.1247	16.9252	10.8559	14.854	14.3196	17.2609	21.6906	15.7091	18.7583	16.4835	11.7342	14.8429	16.5642	14.1996	15.3007	17.3487	14.013		4.52127	3.57574	4.16437	5.00333	5.7425	3.32033	3.95125	7.06184
4.02446	3.04483	4.34822	2.68881	3.59517	3.69393	2.49368	4.46968	5.50347	4.58197	4.65963	5.1375	4.47087	4.34822	3.99539	4.27972	4.8225	3.88548	8.4575	2.61514		14.3075	11.7644	14.9488	13.1166	16.7477	10.9809	14.857	14.3125	17.2549	22.0163	15.7424	18.7271	16.5904	11.7876	14.8459	16.5672	14.1824	15.3068	17.5362	14.009		4.52127	3.58589	4.18805	5.00672	5.7425	3.29327	3.94786	7.02801
4.00773	3.0731	4.34264	2.70076	3.59039	3.66287	2.48293	4.47087	5.56161	4.59392	4.65565	5.1379	4.47684	4.3968	3.83929	4.27654	4.78786	3.86995	8.47462	2.61514		14.1703	11.7876	15.0224	13.2376	16.6227	11.109	14.856	14.3055	17.2821	22.2341	15.7131	18.717	16.6267	11.8521	14.8439	16.5571	14.0231	15.3148	17.625	14.004		4.52634	3.59435	4.22357	4.99826	5.7425	3.27466	3.9614	7.0111
3.99459	3.12766	4.36853	2.70076	3.59438	3.63181	2.48373	4.46689	5.66116	4.59193	4.65485	5.1363	4.47565	4.41034	3.70946	4.26061	4.68631	3.86437	8.49652	2.61554		14.0776	11.9671	15.0476	13.6026	16.5732	11.2764	14.858	14.3034	17.3093	22.4751	15.6889	18.7099	16.6227	11.8673	14.8066	16.5571	13.8053	15.3199	17.5695	13.9667		4.52973	3.59435	4.27093	4.99488	5.72051	3.26621	3.96309	7.01617
3.98743	3.15514	4.40357	2.70395	3.59478	3.63261	2.48253	4.46529	5.72687	4.58556	4.65923	5.1363	4.49994	4.38565	3.65889	4.20804	4.5322	3.86358	8.50051	2.61713		14.0241	12.2625	15.0204	14.007	16.5773	11.3823	14.8661	14.3014	17.3043	22.8159	15.7071	18.723	16.5954	11.8572	14.7814	16.5571	13.5885	15.3441	17.4848	13.9203		4.53988	3.60281	4.27432	4.96781	5.66131	3.25268	3.96647	7.01786
3.98583	3.1862	4.42985	2.70355	3.60194	3.63898	2.48691	4.46012	5.74718	4.56246	4.65087	5.12436	4.54295	4.37131	3.64814	4.16981	4.43742	3.86198	8.5025	2.61156		14.0433	12.3896	14.9891	14.1855	16.6327	11.4125	14.8621	14.2944	17.3073	23.2233	15.7313	18.7593	16.54	11.839	14.7854	16.5521	13.4998	15.3985	17.4031	13.9172		4.54326	3.59604	4.29292	4.94921	5.61733	3.23745	3.93602	7.01955
3.98981	3.2089	4.43384	2.70873	3.59916	3.63898	2.48253	4.45215	5.76192	4.54215	4.63653	5.08533	4.56087	4.39561	3.64256	4.17937	4.41233	3.87194	8.51325	2.602		14.1411	12.4703	14.9377	14.1935	16.7789	11.4528	14.8711	14.2954	17.3124	23.6377	15.7111	18.7573	16.5107	11.838	14.8086	16.546	13.5744	15.4721	17.3235	13.9596		4.54495	3.59604	4.40625	4.91876	5.60719	3.19178	3.89881	7.00264
3.96313	3.21885	4.44459	2.74337	3.58442	3.62942	2.44908	4.44658	5.78222	4.52503	4.63653	5.04073	4.57839	4.47605	3.64256	4.18375	4.39879	3.8819	8.52838	2.57054		14.2752	12.6356	14.8843	14.1935	16.9453	11.5769	14.9801	14.2964	17.3184	23.9382	15.7051	18.7936	16.5964	11.837	14.8843	16.5571	13.7156	15.5094	17.391	14.009		4.54326	3.59604	4.50435	4.86633	5.59196	3.14611	3.88697	6.94513
3.9257	3.26305	4.43822	2.74417	3.55217	3.61747	2.39214	4.44658	5.7882	4.52702	4.63852	4.99533	4.57959	4.52543	3.64097	4.18574	4.39123	3.88707	8.55586	2.54346		14.3992	12.7687	14.8984	14.6554	17.028	11.6606	15.1878	14.2924	17.3144	24.027	15.7081	18.9106	16.7789	11.8411	14.9811	16.5692	13.9374	15.5004	17.5403	14.0372		4.53142	3.59266	4.50266	4.83419	5.54798	3.15288	3.88697	6.8521
3.91734	3.30009	4.43065	2.75492	3.51553	3.60951	2.39851	4.4418	5.7874	4.52821	4.64569	4.93759	4.55529	4.52543	3.63978	4.21879	4.39959	3.88389	8.59449	2.54625		14.4648	12.8	14.9538	15.9602	17.026	11.6424	15.4358	14.2924	17.3214	24.1066	15.7131	19.0286	17.0169	11.8451	15.0385	16.5793	14.3236	15.5064	17.5685	14.0211		4.52973	3.58758	4.47391	4.81727	5.526	3.21039	3.89035	6.76922
3.94362	3.30009	4.42308	2.75173	3.49761	3.60075	2.40249	4.42746	5.7882	4.50233	4.65565	4.89378	4.53578	4.52622	3.64296	4.23154	4.40596	3.88827	8.61241	2.54625		14.4708	12.8141	14.9992	17.1762	17.1057	11.6303	15.6244	14.3226	17.3245	24.3365	15.7222	19.0397	17.1651	11.8037	15.0597	16.5954	14.5868	15.5437	17.5282	13.9687		4.52973	3.58589	4.48575	4.81897	5.59873	3.21377	3.89374	6.75569
3.97707	3.32518	4.39202	2.75651	3.51115	3.59995	2.3993	4.42786	5.78143	4.39481	4.66162	4.86471	4.52264	4.52702	3.65252	4.23074	4.40198	3.87513	8.6136	2.53988		14.4728	12.8171	15.0365	17.7883	17.4283	11.6454	15.7887	14.3105	17.2952	24.7268	15.7464	18.9792	17.2398	11.7453	15.0617	16.6126	14.3609	15.6193	17.5181	13.9828		4.54157	3.58589	4.5145	4.82573	5.71882	3.20531	3.88697	6.77937
3.98782	3.3658	4.38326	2.75691	3.53026	3.61548	2.39253	4.42587	5.77944	4.2395	4.65684	4.85197	4.5318	4.52622	3.64455	4.22198	4.39839	3.85561	8.61599	2.53351		14.4728	12.8181	15.0637	18.0545	17.6986	11.6898	15.8825	14.25	17.2609	25.1452	15.7353	18.8632	17.4394	11.717	15.0708	16.6267	13.9798	15.6909	17.5584	14.0695		4.62952	3.58758	4.53818	4.82911	5.78479	3.20701	3.93095	6.8132
3.99021	3.41557	4.39839	2.75651	3.53584	3.62743	2.36864	4.43822	5.78939	4.13636	4.64808	4.85197	4.57481	4.52622	3.64256	4.263	4.39361	3.84128	8.62794	2.51399		14.4668	12.8393	15.0577	18.2441	17.8458	11.7553	15.7817	14.1875	17.2549	25.5284	15.7232	18.712	17.9174	11.712	15.1515	16.6267	13.8608	15.702	17.5735	14.1431		4.73439	3.58758	4.55002	4.84095	5.68161	3.21715	3.96647	6.83011
3.99021	3.47172	4.40954	2.76209	3.53106	3.63301	2.36625	4.47286	5.79497	4.11645	4.6222	4.84122	4.6441	4.52543	3.65093	4.27136	4.39441	3.83889	8.64148	2.47337		14.5213	12.8827	14.9669	18.4226	17.9335	11.7967	15.6567	14.1451	17.3305	25.8803	15.6627	18.6575	18.3268	11.7503	15.332	16.6277	13.9475	15.694	17.6149	14.1804		4.80713	3.59097	4.55002	4.8714	5.38391	3.2273	3.96647	6.84026
3.99459	3.54221	4.38485	2.7597	3.53106	3.63579	2.37023	4.52383	5.79099	4.10331	4.60189	4.83843	4.73489	4.52264	3.64893	4.24109	4.3749	3.84725	8.64227	2.47855		14.7068	12.9129	14.9054	18.6121	17.9688	11.8078	15.6476	14.1421	17.4112	26.206	15.6113	18.6494	18.475	11.8642	15.4913	16.6378	14.132	15.6244	17.7207	14.2319		4.83081	3.58589	4.55172	4.88493	5.1099	3.22561	3.96309	6.84533
4.01411	3.61031	4.37729	2.78399	3.53225	3.63619	2.37023	4.5772	5.77585	4.06468	4.59551	4.84241	4.83883	4.52423	3.66566	4.16344	4.35538	3.85283	8.63829	2.51798		14.8066	13.0198	14.9064	18.8269	17.992	11.7685	15.6173	14.2097	17.4364	26.5136	15.6093	18.6313	18.4377	11.9469	15.5145	16.6509	14.2944	15.581	17.7429	14.3367		4.83081	3.54191	4.54664	4.87817	4.99995	3.24253	3.96816	6.84195
4.04119	3.62066	4.36813	2.79793	3.53225	3.64057	2.37023	4.60746	5.73723	4.06548	4.58596	4.84361	4.90653	4.52503	3.70469	4.08459	4.33985	3.84844	8.63789	2.51041		14.8076	13.2447	14.8913	19.0377	17.995	11.7634	15.2836	14.2913	17.4334	26.7949	15.6052	18.6162	18.4115	11.9661	15.5316	16.667	14.3851	15.6143	17.7712	14.4053		4.82742	3.48948	4.52803	4.87817	5.04224	3.25098	3.97324	6.83349
4.07822	3.62106	4.35061	2.79793	3.5434	3.64376	2.37541	4.61423	5.69621	4.09694	4.5768	4.84879	4.93401	4.52344	3.7473	4.1041	4.31357	3.8369	8.6375	2.51041		14.8601	13.3869	14.8732	19.1818	17.991	11.8884	14.8782	14.3206	17.4384	27.0631	15.5851	18.6131	18.4145	12.0205	15.6204	16.6832	14.3861	15.7545	17.875	14.4517		4.82573	3.45734	4.51281	4.89677	5.09975	3.24422	3.98	6.83688
4.11127	3.62464	4.33786	2.79912	3.56053	3.66208	2.39293	4.61343	5.61975	4.18295	4.5768	4.8464	4.95232	4.52344	3.74849	4.05433	4.29724	3.82853	8.6359	2.53191		14.977	13.4312	14.8711	19.2323	17.9708	11.9822	14.7643	14.3166	17.4313	27.3535	15.5588	18.595	18.3409	12.1153	15.7192	16.7154	14.3518	15.9803	17.997	14.5414		4.82404	3.41844	4.49928	4.90692	5.12681	3.23914	4.0003	6.82504
4.10849	3.63858	4.33308	2.81704	3.56969	3.68199	2.39771	4.61304	5.48435	4.25105	4.58317	4.80339	4.97701	4.57122	3.7469	3.95477	4.29724	3.84685	8.61599	2.54983		15.0345	13.4665	14.8651	19.2413	17.9073	12.0357	14.736	14.3145	17.4364	27.6278	15.5246	18.5486	18.2521	12.2091	15.7625	16.7608	14.3034	16.2788	18.0989	14.6483		4.81727	3.39645	4.44177	4.87648	5.21984	3.2476	4.01721	6.80981
4.09734	3.66964	4.3299	2.83934	3.58601	3.67761	2.39811	4.61503	5.37245	4.28968	4.5991	4.7783	4.99215	4.62578	3.7465	3.87035	4.31437	3.84964	8.60285	2.55939		15.0355	13.5028	14.8419	19.2373	17.8559	12.0911	14.7401	14.3145	17.4434	27.8486	15.5397	18.5325	18.2411	12.314	15.7313	16.8263	14.2641	16.5611	18.1543	14.7622		4.80205	3.38292	4.37411	4.85787	5.34501	3.22561	4.03244	6.79628
4.10809	3.68238	4.32631	2.8935	3.61827	3.68	2.41364	4.60826	5.32904	4.28888	4.62976	4.78188	5.02082	4.63056	3.73694	3.79787	4.34384	3.8361	8.60484	2.55899		15.0395	13.5391	14.8217	19.198	17.9184	12.1395	14.8903	14.3468	17.4475	28.0624	15.6466	18.5355	18.2219	12.4219	15.6526	16.8899	14.2641	16.7527	18.1594	14.9276		4.80205	3.36093	4.35212	4.84941	5.41605	3.19517	4.0595	6.7523
4.16384	3.67402	4.32154	3.01536	3.64057	3.68398	2.44191	4.60627	5.32427	4.2845	4.67396	4.76954	5.04471	4.63175	3.73256	3.78712	4.38087	3.85999	8.61639	2.5797		15.0617	13.5966	14.9185	19.1183	18.0999	12.1688	14.9962	14.3871	17.4576	28.3094	15.6778	18.5476	18.2915	12.4471	15.6113	16.9433	14.2399	16.8727	18.1584	15.1787		4.78175	3.34232	4.32506	4.84941	5.4651	3.1884	4.08656	6.69479
4.20048	3.67402	4.31795	3.13443	3.65809	3.68477	2.44868	4.60587	5.32387	4.26658	4.711	4.75759	5.04272	4.63693	3.73376	3.80544	4.42826	3.83291	8.63949	2.602		15.0708	13.6551	15.0012	18.9499	18.3026	12.198	14.9841	14.4466	17.4747	28.5464	15.6708	18.5557	18.5748	12.4279	15.6042	17.0179	14.1945	16.9786	18.1584	15.4237		4.76991	3.34063	4.30984	4.88832	5.49386	3.19009	4.10348	6.6745
4.20884	3.68438	4.31676	3.19257	3.67641	3.678	2.42758	4.60945	5.31112	4.20286	4.71896	4.7771	5.02958	4.65087	3.73296	3.81659	4.49317	3.81937	8.66258	2.61036		14.9659	13.6833	14.9841	18.7977	18.3792	12.2101	14.973	14.5344	17.4253	28.7642	15.6415	18.5869	18.8652	12.3946	15.6446	17.0915	14.1724	17.143	18.1564	15.6385		4.77161	3.34063	4.32337	4.96443	5.50062	3.19686	4.12208	6.67619
4.20087	3.68915	4.31676	3.22801	3.70588	3.66367	2.40209	4.61224	5.3167	4.14273	4.69826	4.77949	5.0256	4.65525	3.74013	3.83929	4.51268	3.81022	8.69444	2.60837		14.6392	13.7015	15.0032	18.714	18.479	12.2071	14.977	14.6463	17.4031	28.9931	15.6264	18.6262	19.1022	12.4198	15.6809	17.152	14.1472	17.3961	18.1644	15.8613		4.76653	3.33725	4.32168	5.07776	5.51077	3.19855	4.15761	6.69648
4.19371	3.70309	4.31795	3.24474	3.75486	3.63778	2.41683	4.61582	5.32227	4.12282	4.6891	4.76396	5.0256	4.65366	3.76322	3.86995	4.48998	3.80942	8.76294	2.60598		14.3861	13.7579	15.0718	18.6545	18.722	12.1809	14.977	14.8127	17.384	29.2442	15.6385	18.6192	19.3321	12.6266	15.6718	17.2267	14.1431	17.7218	18.1614	16.1124		4.73439	3.33048	4.3166	5.17586	5.57505	3.18502	4.1593	6.73877
4.18733	3.73893	4.32552	3.24513	3.80464	3.57447	2.41045	4.61582	5.30714	4.11725	4.68193	4.74326	5.02679	4.65366	3.79349	3.87911	4.46131	3.81977	8.83064	2.60598		14.3569	13.8769	15.0839	18.6625	18.8188	12.1184	14.976	15.0234	17.4233	29.5154	15.6456	18.5899	19.4138	12.8494	15.6738	17.3396	14.1976	18.0273	18.1634	16.3413		4.72932	3.33217	4.32675	5.22661	5.66639	3.14104	4.15591	6.76753
4.17897	3.78513	4.30999	3.275	3.82973	3.50358	2.38935	4.61861	5.28524	4.13477	4.65007	4.74565	5.04352	4.66719	3.87313	3.8807	4.45574	3.85601	8.85732	2.60598		14.3246	13.9929	14.8227	18.7926	18.717	12.078	14.978	15.1686	17.5806	29.7705	15.6385	18.5647	19.4188	12.9644	15.6597	17.4838	14.2621	18.2814	18.1806	16.5107		4.72932	3.31864	4.35889	5.23676	5.73066	3.12074	4.1593	6.76583
4.17021	3.83411	4.27893	3.29372	3.84606	3.43708	2.37541	4.61463	5.28126	4.13596	4.61383	4.73848	5.07179	4.67436	4.03481	3.87672	4.45653	3.8803	8.86727	2.60598		14.2762	14.0705	14.5112	19.0054	18.6273	12.0689	14.9801	15.2311	17.7661	30.0246	15.5951	18.5708	19.5559	13.1277	15.6607	17.6582	14.2702	18.5375	18.1886	16.6408		4.72763	3.25944	4.38595	5.208	5.77464	3.12243	4.18805	6.76414
4.15189	3.86398	4.27893	3.29412	3.86676	3.32996	2.36187	4.59591	5.28444	4.1288	4.60069	4.74286	5.05546	4.67436	4.1511	3.87712	4.46171	3.87154	8.87364	2.60598		14.246	14.0957	14.4244	19.2	18.6091	12.0992	14.9448	15.2563	17.8579	30.315	15.4782	18.5889	19.7334	13.279	15.6567	17.8276	14.2187	18.843	18.2098	16.7729		4.7327	3.22054	4.40625	5.18432	5.822	3.12074	4.21512	6.73708
4.13676	3.86159	4.28808	3.30168	3.88827	3.2758	2.35431	4.5999	5.25736	4.10649	4.60826	4.74803	5.04511	4.67158	4.19729	3.87552	4.48083	3.89942	8.87086	2.60598		14.252	14.1038	14.496	19.4047	18.6454	12.2504	14.8732	15.2473	17.8387	30.5843	15.2463	18.6182	19.8353	13.3223	15.6748	17.9295	13.9445	19.1778	18.2451	16.8858		4.74623	3.21208	4.39441	5.19785	5.84399	3.12412	4.22526	6.73539
4.1272	3.86039	4.27335	3.33951	3.91216	3.27699	2.35231	4.60069	5.23785	4.1045	4.61742	4.74764	5.04511	4.67277	4.21441	3.87552	4.48162	3.92212	8.86926	2.60479		14.3357	14.1451	14.5838	19.6013	18.7654	12.5156	14.8883	15.212	17.8518	30.7335	14.9316	18.6615	19.92	13.3395	15.697	18.0021	13.7247	19.4823	18.2663	17.022		4.75131	3.22223	4.33859	5.24521	5.83553	3.13089	4.23541	6.72862
4.10968	3.85482	4.26021	3.35066	3.94322	3.27819	2.35351	4.60109	5.25418	4.10331	4.61702	4.74525	5.04551	4.65923	4.20645	3.89464	4.45016	3.91933	8.87046	2.60758		14.5041	14.3206	14.615	19.6901	19.0558	12.7526	15.0043	15.1726	17.9022	30.7718	14.6392	18.7049	20.0158	13.3657	15.7	18.1493	13.6581	19.7657	18.3167	17.2751		4.74623	3.21715	4.26924	5.3078	5.82369	3.12412	4.23203	6.71509
4.09614	3.84964	4.26101	3.34111	3.95557	3.28655	2.3563	4.62697	5.26254	4.10769	4.61901	4.74166	5.05347	4.63574	4.19012	3.93287	4.42707	3.93167	8.87046	2.60917		14.732	14.5081	14.613	19.685	19.3785	12.9704	15.0153	15.1434	17.9214	30.798	14.5001	18.7926	20.0631	13.409	15.8029	18.4084	13.6026	20.0823	18.4306	17.6209		4.74623	3.19855	4.28616	5.37884	5.81354	3.13258	4.21173	6.66604
4.09614	3.85721	4.25463	3.33473	3.95477	3.2985	2.3563	4.66122	5.29599	4.09972	4.65206	4.73529	5.08334	4.60905	4.16981	3.95517	4.40078	4.06866	8.87046	2.60997		14.8651	14.5787	14.6029	19.6406	19.2141	13.2659	15.0133	15.1333	17.9113	30.8464	14.4739	18.9862	20.0752	13.5119	15.9289	18.6625	13.5623	20.4604	18.5526	18.0424		4.74623	3.19855	4.40963	5.44819	5.80509	3.16303	4.20835	6.5544
4.10291	3.8592	4.23751	3.32358	3.96712	3.29571	2.36028	4.65764	5.34696	4.08937	4.71299	4.72653	5.11321	4.57998	4.16782	3.96114	4.34344	4.30561	8.86847	2.61355		14.8409	14.6352	14.6009	19.6215	18.5184	13.6127	15.0083	15.1192	17.8952	30.9049	14.494	19.2595	19.9603	13.766	15.939	18.844	13.5653	20.8345	18.6172	18.5385		4.74792	3.17487	4.56017	5.50062	5.80339	3.19009	4.20666	6.47659
4.11167	3.86039	4.22875	3.30925	3.97986	3.2758	2.3547	4.64131	5.339	4.09813	4.76954	4.72932	5.13352	4.55211	4.18893	3.96433	4.29008	4.42388	8.86807	2.64501		15.0285	14.7985	14.61	19.6114	17.6996	13.8678	15.0113	15.1021	17.9083	30.9916	14.617	19.4511	19.6769	14.127	15.9733	18.9469	13.6087	21.1975	18.6121	18.9933		4.75807	3.16979	4.61261	5.50908	5.79663	3.21885	4.20666	6.41401
4.12003	3.85561	4.22875	3.30845	3.99419	3.24274	2.33001	4.63215	5.25936	4.06627	4.82529	4.72454	5.14467	4.53976	4.20486	3.96433	4.27255	4.43941	8.86687	2.67408		15.2009	15.0234	14.49	19.6326	17.151	14.0342	15.0012	15.095	17.9164	31.1106	14.6402	19.5418	19.5106	14.4971	16.0297	19.0306	13.6904	21.5444	18.5657	19.3139		4.76822	3.16979	4.6346	5.49724	5.77295	3.25606	4.20835	6.31083
4.1268	3.82814	4.23034	3.31044	4.01092	3.24036	2.31807	4.63135	5.14905	4.03362	4.90414	4.69587	5.14307	4.5326	4.21123	3.94601	4.27136	4.48003	8.86966	2.6924		15.1575	15.1081	14.2399	19.6437	16.909	14.2329	14.974	15.1071	17.9113	31.2306	14.4971	19.6739	19.4722	14.8802	16.0701	19.1667	13.7932	21.8862	18.5002	19.5146		4.753	3.16979	4.65828	5.51415	5.81185	3.26452	4.21173	6.24148
4.128	3.82614	4.23194	3.32358	4.02048	3.24354	2.32324	4.63494	5.07936	4.03163	4.98458	4.67715	5.14307	4.50233	4.22198	3.9257	4.27056	4.51906	8.87683	2.72187		15.0285	15.1162	14.0907	19.6316	16.7779	14.486	14.9669	15.1868	17.9275	31.3294	14.1875	19.926	19.4067	15.1989	16.1457	19.3553	13.8678	22.2573	18.4558	19.6427		4.7327	3.16641	4.66335	5.57674	5.84906	3.26113	4.21512	6.21611
4.11804	3.83092	4.23313	3.34429	4.02565	3.17345	2.30532	4.6429	5.05507	4.0372	5.05069	4.67596	5.14347	4.45813	4.23592	3.93446	4.28331	4.52702	8.90988	2.737		14.7723	15.1273	14.013	19.6326	16.6731	14.6765	14.9569	15.3491	18.0454	31.4202	13.9364	20.1599	19.3452	15.3693	16.2738	19.5721	13.8547	22.6506	18.4427	19.7546		4.74454	3.16641	4.65828	5.67992	5.86429	3.25775	4.21681	6.19074
4.12999	3.83252	4.23313	3.3427	4.0372	3.11571	2.2647	4.65644	5.04471	4.04636	5.09409	4.67556	5.14307	4.43224	4.24149	3.93446	4.30362	4.52821	8.97519	2.73979		14.4386	15.1545	13.9606	19.6316	16.7094	14.8429	14.9599	15.5135	18.3177	31.5079	13.887	20.2991	19.3149	15.4731	16.4422	19.7909	13.8386	23.0317	18.4286	19.9462		4.73608	3.16641	4.65828	5.7628	5.87613	3.2476	4.22526	6.19243
4.16583	3.84327	4.25224	3.38093	4.05791	3.12407	2.27187	4.65286	5.0483	4.03681	5.12993	4.67516	5.14387	4.42707	4.24229	3.92013	4.31556	4.52821	9.05046	2.74297		14.2853	15.1827	13.9193	19.6316	16.909	15.095	14.9851	15.6647	18.6686	31.5604	13.8164	20.3586	19.2998	15.6335	16.7084	19.9633	13.8305	23.4099	18.3883	20.2436		4.70395	3.15288	4.66166	5.78648	5.87782	3.23576	4.23203	6.19074
4.21242	3.86915	4.2841	3.38571	4.06588	3.12407	2.28382	4.67795	5.0921	4.02645	5.16259	4.67038	5.14387	4.42866	4.23273	3.86079	4.32393	4.52941	9.1297	2.74297		14.2803	15.211	13.882	19.6316	17.0845	15.3864	14.9932	15.8624	18.9923	31.6017	13.646	20.3505	19.2232	15.8603	16.9161	20.0722	13.8235	23.7577	18.3691	20.534		4.6735	3.14104	4.6735	5.7831	5.88628	3.23914	4.22357	6.14845
4.35419	3.88827	4.29207	3.38531	4.04596	3.12646	2.28382	4.70383	5.18887	4.00973	5.19006	4.66361	5.15582	4.43184	4.1957	3.8365	4.31994	4.53658	9.18744	2.76886		14.2127	15.2725	13.8578	19.6437	17.1682	15.6062	15.0022	16.0106	19.2353	31.6904	13.5532	20.3546	19.1274	16.0519	16.9282	20.2073	13.8315	24.0582	18.3752	20.7569		4.66335	3.14104	4.67688	5.7831	5.89642	3.24083	4.22188	6.10786
4.61941	3.89982	4.29645	3.39327	4.02685	3.12845	2.33559	4.71777	5.2944	3.91734	5.20998	4.66361	5.19444	4.4187	4.18096	3.82535	4.32154	4.58237	9.20298	2.78837		14.1976	15.3622	13.8709	19.6941	17.145	15.7202	14.978	16.0812	19.4612	31.7771	13.5482	20.3757	19.0225	16.1528	16.9332	20.404	13.8709	24.3335	18.36	20.9787		4.65997	3.13089	4.67012	5.78141	5.9201	3.24083	4.22188	6.04358
4.79702	3.9265	4.31516	3.43389	4.02048	3.12806	2.38218	4.72892	5.37962	3.76761	5.22391	4.65843	5.21874	4.42229	4.19331	3.7684	4.31954	4.60746	9.20377	2.79554		14.0826	15.4247	13.885	19.7223	17.0371	15.7504	14.9105	16.1518	19.6336	31.7832	13.4857	20.5532	18.8935	16.2062	16.9453	20.6157	13.8245	24.6501	18.3429	21.2117		4.66166	3.10044	4.65659	5.77295	5.92518	3.24422	4.22188	5.94209
4.88662	3.95119	4.33547	3.50557	4.02725	3.13045	2.35869	4.72613	5.47599	3.72141	5.23307	4.67635	5.23347	4.43543	4.1957	3.70628	4.30919	4.63494	9.2436	2.80908		13.6752	15.452	13.8265	19.6971	16.9181	15.7363	14.9226	16.2193	19.7132	31.7529	13.0632	20.8839	18.7452	16.307	17.0129	20.8295	13.7811	25.001	18.3348	21.375		4.67519	3.07169	4.65828	5.77971	5.93364	3.26113	4.22357	5.8017
4.97303	3.91893	4.33547	3.60314	4.05592	3.1408	2.34953	4.711	5.58112	3.71823	5.23148	4.68472	5.25298	4.44538	4.1957	3.74331	4.29247	4.65047	9.32404	2.80072		13.4322	15.456	13.6954	19.6366	16.8294	15.7131	15.091	16.2465	19.7314	31.7328	12.439	21.1774	18.6797	16.4795	16.9806	21.0382	13.7327	25.3348	18.2118	21.5162		4.70395	3.05647	4.6735	5.77464	5.95393	3.2882	4.23203	5.63763
5.00131	3.8799	4.33547	3.70349	4.07503	3.14558	2.36187	4.70742	5.66475	3.73057	5.22352	4.68073	5.26174	4.46928	4.21879	3.76203	4.28092	4.67277	9.35749	2.80191		13.2406	15.4782	13.5734	19.6084	16.789	15.697	15.2483	16.298	19.7314	31.7187	11.9974	21.4355	18.7069	16.665	16.8939	21.2187	13.5835	25.6212	18.1211	21.6735		4.74116	3.03109	4.70056	5.77633	5.95563	3.29496	4.2371	5.55813
4.97303	3.87951	4.32831	3.77517	4.08021	3.14558	2.39333	4.71737	5.7432	3.73376	5.21635	4.68034	5.26732	4.50671	4.27614	3.73814	4.28689	4.67556	9.35191	2.79713		13.0783	15.5094	13.5391	19.6064	16.9816	15.7666	15.2584	16.4119	19.7264	31.7529	11.6464	21.7824	18.6988	16.8062	16.8304	21.3962	13.4867	25.9267	18.119	21.8247		4.7327	3.01418	4.73778	5.77295	5.95563	3.29834	4.2371	5.55475
4.93998	3.87871	4.31477	3.7919	4.09455	3.14677	2.44191	4.72374	5.77506	3.73256	5.20958	4.68352	5.2709	4.5768	4.31397	3.69871	4.29286	4.67476	9.33479	2.79713		13.0844	15.5508	13.6016	19.6185	17.268	15.9481	15.2664	16.5148	19.7163	31.8467	11.4034	22.1272	18.6978	16.91	16.8536	21.5989	13.5825	26.2453	18.1211	21.8762		4.70733	3.01587	4.77161	5.76787	5.95732	3.31018	4.23541	5.55982
4.92007	3.8799	4.30282	3.7911	4.11048	3.16151	2.46501	4.72016	5.7205	3.73097	5.19086	4.69666	5.25975	4.64091	4.33547	3.67084	4.28649	4.67197	9.29417	2.79514		13.1539	15.6919	13.6994	19.6356	17.505	16.1346	15.2614	16.6025	19.682	31.9385	11.3732	22.4146	18.6999	17.0603	16.912	21.8005	13.7428	26.5126	18.1261	21.8187		4.71748	3.01249	4.79529	5.76957	5.95732	3.30004	4.2371	5.58858
4.92883	3.8807	4.29804	3.82296	4.128	3.16828	2.46382	4.72175	5.58709	3.68079	5.15622	4.69666	5.25617	4.66082	4.34264	3.66088	4.27972	4.67158	9.25156	2.79395		13.1882	15.9128	13.7731	19.6427	17.7137	16.3121	15.2412	16.7406	19.6134	32.006	11.4014	22.6526	18.6777	17.2771	16.9292	21.98	13.7912	26.7435	18.24	21.9568		4.72594	3.01249	4.80543	5.78479	5.95732	3.29665	4.2371	5.64609
4.95432	3.8807	4.3072	3.84486	4.13437	3.16987	2.46302	4.72215	5.45449	3.58323	5.14347	4.70423	5.25577	4.66043	4.33388	3.65013	4.27813	4.66082	9.22209	2.77483		13.1912	16.0126	13.8255	19.6326	17.8508	16.4583	15.1232	16.8818	19.5086	32.0726	11.4186	22.9027	18.6363	17.512	16.8677	22.1323	13.7882	26.9552	18.5315	22.1817		4.73608	3.00065	4.79698	5.84906	5.96577	3.30173	4.23541	5.66131
4.97064	3.88349	4.32193	3.84566	4.13556	3.17027	2.46581	4.71936	5.35493	3.53783	5.14666	4.7341	5.25298	4.65525	4.32631	3.6342	4.25901	4.64927	9.16395	2.76328		13.2709	16.0398	13.8073	19.6144	17.9133	16.5178	15.0244	16.9594	19.3875	32.0736	11.4075	23.1578	18.6323	17.757	16.7235	22.2503	13.764	27.1145	18.9187	22.3511		4.68027	2.99896	4.78344	5.9201	5.96577	3.30173	4.2388	5.6444
4.981	3.8819	4.34503	3.84048	4.13238	3.17544	2.47298	4.71578	5.29599	3.53504	5.14785	4.74684	5.25059	4.64649	4.31835	3.62663	4.21043	4.63374	9.05165	2.76089		13.2709	16.0499	13.7781	19.6064	17.9033	16.5269	14.9679	17.026	19.3341	31.9758	11.6384	23.3746	18.598	17.9557	16.5652	22.3662	13.7559	27.2486	19.3613	22.5165		4.65659	2.99896	4.75638	5.93871	5.96747	3.30849	4.24218	5.63763
4.98418	3.87075	4.41671	3.85402	4.11884	3.19018	2.48891	4.71578	5.29201	3.53186	5.15144	4.74644	5.2498	4.63693	4.31994	3.62663	4.18216	4.62777	8.92661	2.75412		13.2568	16.0156	13.8991	19.6265	17.8538	16.546	14.9932	17.144	19.3139	31.885	12.6064	23.6529	18.3893	18.0918	16.4018	22.5144	13.7751	27.4251	19.8131	22.7		4.65997	3.0091	4.74285	5.9404	5.96577	3.3068	4.24049	5.63425
4.97542	3.86318	4.49277	3.85123	4.10012	3.18779	2.50802	4.72135	5.28643	3.52469	5.15821	4.74923	5.25259	4.63613	4.32154	3.62066	4.16981	4.62777	8.81112	2.77364		13.2366	15.9945	13.9606	19.7284	17.8337	16.6317	15.1021	17.3325	19.3321	31.8286	13.8386	24.1036	18.0253	18.237	16.1306	22.7101	13.7932	27.659	19.9623	22.8593		4.67857	3.02602	4.75638	5.93025	5.96747	3.2865	4.24049	5.61564
4.96905	3.86358	4.52662	3.8596	4.07503	3.20611	2.53669	4.65246	5.26573	3.545	5.1586	4.7556	5.25936	4.63374	4.32074	3.60553	4.16503	4.60786	8.69524	2.77244		13.0884	15.9844	13.9364	19.8947	17.8347	16.7114	15.1585	17.5695	19.2907	31.7832	14.736	24.5432	17.8276	18.4548	15.8462	22.9319	13.7862	27.9293	19.8373	22.9753		4.69718	3.00572	4.76484	5.90657	5.96577	3.27466	4.2371	5.58351
5.0029	3.86198	4.54733	3.89822	4.03561	3.2081	2.56497	4.57441	5.24502	3.55973	5.16219	4.74803	5.26055	4.64171	4.33587	3.60115	4.16503	4.57043	8.59967	2.75452		12.9028	15.9773	13.9142	20.0137	17.8054	16.7245	15.1535	17.8337	19.0487	31.7822	15.1555	24.8054	17.8387	18.7684	15.7414	23.1255	13.771	28.2187	20.0994	23.0842		4.69549	2.9499	4.77161	5.89981	5.96408	3.2679	4.25233	5.60719
5.08653	3.8576	4.56764	3.95278	4.01411	3.20491	2.60797	4.5756	5.22949	3.56172	5.16099	4.73808	5.25856	4.6437	4.36255	3.59916	4.17419	4.5533	8.57458	2.74457		12.8121	15.9834	13.9122	20.0611	17.8619	16.7628	15.1968	18.1069	18.7523	31.8286	15.3541	25.0202	17.7449	19.1314	15.7434	23.2233	13.7206	28.4909	20.5098	23.1618		4.7141	2.90085	4.7733	5.89981	5.9607	3.27128	4.25909	5.65624
5.14745	3.86477	4.55728	4.02008	4.01132	3.20292	2.70873	4.57441	5.21913	3.59677	5.16298	4.73171	5.25736	4.61423	4.38684	3.59358	4.20127	4.50751	8.58413	2.74775		12.7385	15.9975	13.9193	20.0783	18.1261	16.791	15.336	18.352	18.4367	31.885	15.5064	25.2743	17.6663	19.3815	15.7272	23.2556	13.6591	28.7592	20.6944	23.2062		4.75131	2.88225	4.78344	5.89981	5.95732	3.28143	4.2574	5.67992
5.17254	3.86597	4.52901	4.05512	4.00694	3.20173	2.8489	4.56366	5.20719	3.62345	5.15622	4.72215	5.25776	4.60268	4.40636	3.59478	4.21123	4.46171	8.58493	2.76129		12.678	16.0076	13.9203	20.1599	18.2995	16.8132	15.5498	18.4861	18.0706	31.9113	15.5649	25.5163	17.6602	19.4904	15.7484	23.2858	13.5795	29.0667	20.8174	23.2384		4.80713	2.88394	4.79867	5.91672	5.95732	3.28312	4.25909	5.68668
5.1821	3.86716	4.50791	4.06468	3.99101	3.20053	2.94328	4.54016	5.18807	3.62265	5.14785	4.71657	5.25657	4.60228	4.41273	3.59995	4.21123	4.46609	8.53436	2.7808		12.679	16.0197	13.9152	20.2799	18.2642	16.8092	15.7293	18.5284	17.8145	31.8618	15.5498	25.7351	17.7389	19.5761	15.8553	23.3393	13.4766	29.3843	20.9908	23.2455		4.87309	2.88394	4.78344	5.94717	5.9607	3.28312	4.25909	5.70191
5.17692	3.87114	4.48361	4.07026	3.96791	3.19695	2.98708	4.50552	5.18369	3.62504	5.14745	4.576	5.25378	4.60228	4.41512	3.60433	4.21879	4.47445	8.44117	2.78359		12.6729	16.0166	13.9142	20.3767	18.3651	16.8132	15.8119	18.5486	17.7379	31.7227	15.5447	25.9448	17.7006	19.6517	15.9692	23.4169	13.5048	29.6606	21.132	23.2556		4.92214	2.88394	4.74623	5.99622	5.97423	3.29327	4.26078	5.66808
5.16816	3.87075	4.4649	4.06349	3.96035	3.18142	3.03646	4.40556	5.19922	3.61309	5.14467	4.48361	5.25378	4.58954	4.38485	3.60832	4.25185	4.46768	8.34839	2.7828		12.6669	15.9753	13.9283	20.4272	18.4952	16.8223	15.8321	18.5718	17.8216	31.5977	15.5861	26.1385	17.4061	19.6659	16.0358	23.5359	13.5411	29.9157	21.2369	23.31		4.99319	2.88563	4.72255	6.06388	5.99115	3.32372	4.25064	5.58351
5.16099	3.87114	4.47127	4.07981	3.96313	3.14518	3.10098	4.25264	5.20878	3.60433	5.14228	4.4876	5.26055	4.54175	4.36932	3.61708	4.26658	4.45574	8.17356	2.78439		12.6598	15.945	13.9223	20.4272	18.5799	16.8072	15.7998	18.6061	18.0414	31.5634	15.6708	26.3764	16.8989	19.6648	16.0993	23.6982	13.5331	30.1436	21.2217	23.3816		5.11835	2.88563	4.70564	6.12308	5.99284	3.33725	4.2777	5.5446
5.13352	3.86716	4.47565	4.13437	3.9711	3.08306	3.1623	4.21163	5.21077	3.60792	5.14387	4.49596	5.25617	4.50074	4.37092	3.62185	4.26817	4.44578	7.83229	2.78917		12.6165	15.944	13.9162	20.4241	18.594	16.8092	15.7444	18.6464	18.1231	31.5856	15.7555	26.6769	16.549	19.6921	16.1225	23.8747	13.5482	30.3776	21.0685	23.3786		5.20462	2.84672	4.67181	6.16198	5.98607	3.34401	4.29461	5.54291
5.06861	3.86398	4.47565	4.20605	3.97309	3.04244	3.22482	4.22039	5.21077	3.59278	5.1363	4.49437	5.26015	4.47645	4.36853	3.62185	4.24906	4.43423	7.43924	2.82063		12.561	15.944	14.0524	20.4342	18.5768	16.8485	15.7272	18.7301	17.9577	31.6007	15.8129	26.8574	16.4079	19.7748	16.0761	24.0018	13.5351	30.6256	20.8759	23.2294		5.21815	2.7131	4.64136	6.23641	5.97254	3.32541	4.29123	5.53953
5.01923	3.86159	4.47445	4.25503	3.96831	3.05757	3.27182	4.17857	5.21037	3.51234	5.11639	4.49437	5.29639	4.47087	4.39123	3.63181	4.19092	4.42388	6.9769	2.85408		12.4763	15.9622	13.8487	20.4625	18.5819	16.8989	15.7535	18.834	17.6219	31.5916	15.7867	26.926	16.3564	19.9038	16.058	24.033	13.5028	30.8192	20.7075	23.065		5.21815	2.68604	4.62952	6.35819	5.97761	3.27974	4.30307	5.54122
5.02799	3.85482	4.47246	4.25663	3.95597	3.06553	3.29252	4.12481	5.21475	3.48686	5.11281	4.46091	5.34099	4.49277	4.44499	3.67761	4.1722	4.42308	6.38753	2.86602		12.3987	15.9894	13.4776	20.4806	18.5718	16.9322	15.8664	18.9388	17.0976	31.5795	15.7484	27.0006	16.3383	20.0813	16.06	24.0068	13.5311	30.8999	20.6359	22.9743		5.21646	2.68604	4.62276	6.43938	6.00806	3.27297	4.31322	5.55137
5.08812	3.84606	4.48879	4.26738	3.94959	3.06593	3.30925	4.04796	5.21635	3.48686	5.10484	4.4203	5.37285	4.51069	4.45773	3.71902	4.17379	4.42308	5.95625	2.86642		12.3704	16.0227	13.4302	20.4826	18.5264	16.9947	16.061	19.0669	16.4855	31.5241	15.7474	27.1105	16.3302	20.2325	16.058	23.9977	13.5553	30.9725	20.6429	22.9551		5.23337	2.68604	4.61937	6.46983	6.05373	3.28143	4.31322	5.56997
5.16697	3.84606	4.52662	4.2853	3.94482	3.07031	3.31841	3.97588	5.21515	3.46296	5.05785	4.37848	5.39873	4.54454	4.44021	3.73654	4.17499	4.43304	5.77625	2.86443		12.4037	16.065	13.4968	20.4816	18.5234	17.0492	16.2042	19.1476	16.0771	31.4061	15.7333	27.2093	16.3292	20.3031	16.0489	24.029	13.5109	31.0804	20.654	22.942		5.30272	2.68604	4.64813	6.50873	6.07064	3.27974	4.30984	5.60549
5.2052	3.84168	4.56047	4.31516	3.93884	3.10775	3.31004	3.95358	5.21675	3.40562	5.00091	4.37689	5.4075	4.56167	4.44299	3.723	4.17937	4.45255	5.66833	2.85806		12.4793	16.0882	13.4826	20.4816	18.5153	17.0169	16.1669	19.1748	15.9773	31.3042	15.8069	27.2789	16.3333	20.3122	16.0076	24.0784	13.5149	31.1984	20.6631	22.9037		5.44481	2.66912	4.71579	6.54087	6.05204	3.26621	4.22865	5.64609
5.20759	3.83889	4.58874	4.34185	3.94322	3.22482	3.2969	3.95278	5.20679	3.34429	4.97781	4.39561	5.40511	4.53299	4.46569	3.71185	4.20167	4.44658	5.61816	2.85726		12.4975	16.0913	13.5129	20.4907	18.5415	16.9494	16.1195	19.2222	15.9844	31.2367	15.936	27.2991	16.3857	20.3011	15.8896	24.1359	13.5179	31.3335	20.6762	22.8623		5.49047	2.6725	4.78006	6.5544	6.04527	3.24253	4.17959	5.69007
5.20838	3.84168	4.59512	4.35817	3.94203	3.30487	3.28894	3.96353	5.18648	3.31522	4.97064	4.40755	5.41227	4.49277	4.50114	3.71185	4.22198	4.44538	5.61736	2.85527		12.5045	16.1104	13.5058	20.4887	18.6343	16.8979	16.1397	19.2736	15.9985	31.1721	15.9612	27.3303	16.4169	20.3394	15.8533	24.2075	13.524	31.4515	20.7065	22.821		5.42451	2.6725	4.82235	6.5544	6.04358	3.23069	4.19482	5.71882
5.21794	3.85482	4.5979	4.36295	3.93128	3.30885	3.2527	3.98185	5.1813	3.33633	4.94874	4.39282	5.40949	4.43025	4.54574	3.68716	4.20565	4.44857	5.62293	2.85607		12.5197	16.1528	13.4655	20.4614	18.7704	16.8647	16.1598	19.2797	16.0832	31.1247	15.9612	27.3727	16.4432	20.4161	15.9531	24.2851	13.5694	31.5261	20.7529	22.7726		5.4262	2.62514	4.84772	6.50535	6.06219	3.22899	4.19651	5.71036
5.27051	3.86119	4.61025	4.35618	3.92889	3.29929	3.23916	3.99141	5.17732	3.35265	4.91768	4.39043	5.39953	4.34623	4.58237	3.64854	4.17061	4.46052	5.62532	2.872		12.5126	16.2052	13.5563	20.4493	19.0003	16.8132	16.1507	19.2726	16.0983	31.1126	15.9511	27.4019	16.4573	20.4665	15.9945	24.3728	13.641	31.5967	20.7619	22.7534		5.43127	2.59639	4.85279	6.43938	6.10109	3.22899	4.20497	5.71882
5.3402	3.86119	4.6429	4.35937	3.91973	3.2981	3.23956	3.9938	5.16577	3.33513	4.90016	4.38923	5.39595	4.34105	4.61224	3.61389	4.1503	4.48361	5.6301	2.8704		12.5146	16.2788	13.5835	20.4645	19.2867	16.8465	16.0933	19.2645	16.058	31.1096	15.9279	27.4624	16.4684	20.4867	15.9783	24.4606	13.7226	31.6924	20.7387	22.7665		5.43466	2.58793	4.84772	6.42923	6.12815	3.23069	4.22695	5.71206
5.39873	3.86079	4.67874	4.35937	3.8803	3.33035	3.23319	3.99419	5.17692	3.33075	4.90095	4.39043	5.39316	4.31716	4.64649	3.59955	4.14831	4.50193	5.62931	2.86961		12.4945	16.3837	13.6541	20.4675	19.4601	16.9423	16.0489	19.2323	16.0671	31.1086	15.9208	27.5643	16.4593	20.4735	15.9531	24.5211	13.8033	31.8064	20.7508	22.7827		5.43804	2.54734	4.8511	6.45799	6.15183	3.23238	4.2371	5.71036
5.51541	3.8588	4.72773	4.35857	3.85999	3.37177	3.24314	3.98743	5.19803	3.34469	4.8902	4.39879	5.38798	4.29127	4.67038	3.59955	4.14433	4.54972	5.60143	2.86921		12.4118	16.4996	13.8951	20.4675	19.5116	16.9907	16.0489	19.2131	15.9743	31.1076	15.9198	27.7125	16.428	20.4735	15.944	24.5503	13.8336	31.9304	20.772	22.8069		5.45495	2.47291	4.84941	6.48844	6.17044	3.23407	4.2371	5.71544
5.66395	3.85721	4.75242	4.35857	3.8592	3.37177	3.2531	3.97906	5.2036	3.33434	4.91051	4.38764	5.38241	4.28968	4.65565	3.59199	4.13238	4.6652	5.55524	2.86284		12.3422	16.6368	13.9798	20.4493	19.5237	17.0078	16.0892	19.2464	15.8079	31.0874	15.9148	27.8567	16.3887	20.4887	15.9854	24.5463	13.8346	32.0434	20.772	22.8301		5.45326	2.44585	4.8511	6.53072	6.19412	3.23745	4.25064	5.71713
5.75315	3.86119	4.76396	4.36375	3.87433	3.36381	3.2519	3.98424	5.20121	3.32956	4.94197	4.3749	5.38081	4.27654	4.64609	3.57765	4.11685	4.72215	5.5417	2.84412		12.3341	16.791	13.9656	20.4403	19.5237	17.0018	16.2919	19.2897	15.8351	31.0179	15.9914	27.9525	16.3897	20.533	16.0197	24.512	13.7983	32.126	20.771	22.8109		5.44142	2.43063	4.84603	6.64236	6.23133	3.23914	4.2574	5.71882
5.8101	3.8588	4.75799	4.36136	3.89782	3.37018	3.24991	3.97588	5.19405	3.33434	4.94874	4.36693	5.38241	4.2399	4.6433	3.56332	4.11685	4.72454	5.57794	2.84014		12.3745	16.9534	13.9354	20.4403	19.5196	16.9665	16.5501	19.318	16.0852	30.918	16.0983	27.9979	16.3857	20.5643	16.0691	24.4706	13.8094	32.1875	20.7619	22.7575		5.45665	2.4154	4.79021	6.7929	6.20765	3.23069	4.2574	5.7222
5.82643	3.84725	4.75321	4.36773	3.90539	3.44544	3.24951	3.95278	5.17095	3.34071	4.94277	4.32034	5.3832	4.21322	4.6445	3.56132	4.13676	4.72414	5.59944	2.83894		12.4088	17.1581	13.9142	20.4503	19.5136	16.906	16.7084	19.3724	16.3806	30.8646	16.177	28.0251	16.4008	20.5623	16.187	24.4545	13.8608	32.2682	20.769	22.7322		5.48709	2.41371	4.65828	6.86732	6.16368	3.2087	4.26078	5.7239
5.79736	3.82614	4.77233	4.38485	3.90539	3.55854	3.24951	3.93406	5.13113	3.32159	4.93958	4.28132	5.38241	4.21123	4.61861	3.57646	4.16663	4.72255	5.62055	2.84014		12.4299	17.4152	13.9152	20.4907	19.5065	16.8727	16.8122	19.3956	16.5299	30.8394	16.2304	28.0795	16.4422	20.5451	16.299	24.4686	13.9233	32.4336	20.768	22.7212		5.58689	2.40864	4.52127	6.86563	6.14507	3.17487	4.24894	5.76449
5.77545	3.82296	4.78706	4.39043	3.9042	3.62544	3.24713	3.92451	5.09409	3.30606	4.9364	4.28132	5.3828	4.21521	4.60587	3.56132	4.20963	4.72016	5.63767	2.84532		12.6094	17.6935	13.9172	20.5613	19.4934	16.8697	16.8314	19.3089	16.5168	30.8091	16.2163	28.1824	16.4946	20.53	16.3756	24.4475	13.9223	32.6494	20.7408	22.705		5.72559	2.40356	4.47729	6.85717	6.14338	3.18333	4.21681	5.80678
5.73882	3.82137	4.7771	4.38963	3.88389	3.64057	3.24553	3.91614	5.06861	3.30606	4.93918	4.25782	5.38798	4.22397	4.61622	3.52986	4.27016	4.72056	5.6313	2.85089		12.7526	17.9053	13.888	20.6399	19.4763	16.8747	16.786	19.1929	16.7245	30.7779	16.2092	28.2489	16.5228	20.524	16.3847	24.3133	13.7599	32.8218	20.7166	22.6939		5.67823	2.40356	4.47898	6.85886	6.13999	3.19009	4.17114	5.79663
5.70417	3.81977	4.69308	4.41791	3.87075	3.63938	3.26345	3.90181	5.04471	3.30646	4.95352	4.23552	5.38519	4.22317	4.63096	3.52071	4.35538	4.72374	5.61855	2.86204		12.7758	18.0091	13.7942	20.6964	19.4844	16.8858	16.7396	19.1072	16.9877	30.7638	16.2072	28.2772	16.5319	20.531	16.3403	24.1328	13.4282	32.9367	20.7579	22.6909		5.59704	2.40695	4.47222	6.87409	6.14507	3.20024	4.12547	5.73235
5.70139	3.80942	4.56764	4.45215	3.86915	3.63818	3.28974	3.89225	5.02122	3.30168	4.97502	4.20645	5.38201	4.22238	4.66242	3.51832	4.45375	4.73768	5.62453	2.87837		12.7708	18.0817	13.8366	20.7176	19.4874	16.8122	16.6257	19.0598	17.1813	30.7537	16.183	28.3397	16.538	20.5441	16.3423	24.0945	13.1499	32.9428	20.7639	22.6929		5.55813	2.40695	4.48237	6.87916	6.17044	3.22054	4.12039	5.64101
5.787	3.78393	4.5091	4.47565	3.84685	3.57845	3.29412	3.88588	4.96706	3.30009	5.00011	4.18176	5.38201	4.22795	4.6891	3.51394	4.51388	4.74883	5.64842	2.88155		12.7395	18.237	13.9707	20.7387	19.4864	16.6237	16.546	19.0669	17.5473	30.7416	16.1921	28.4345	16.548	20.5582	16.4008	24.151	13.163	32.8541	20.7418	22.7121		5.56997	2.40356	4.49082	6.86394	6.21442	3.22561	4.1187	5.57166
5.95705	3.77876	4.50313	4.48799	3.81698	3.51871	3.29531	3.87433	4.91648	3.29889	5.02201	4.17738	5.3844	4.22556	4.70981	3.51115	4.53618	4.75918	5.6759	2.88116		12.68	18.4982	14.0554	20.8013	19.4864	16.4855	16.9211	19.0911	18.118	30.7375	16.2163	28.5121	16.5864	20.5451	16.5158	24.2186	13.1963	32.7401	20.7629	22.7242		5.65624	2.39849	4.47729	6.85379	6.27193	3.22392	4.1187	5.54968
6.11673	3.78075	4.5083	4.45454	3.80822	3.51871	3.32199	3.85999	4.90255	3.29332	5.02719	4.17857	5.3844	4.22636	4.71777	3.4761	4.58636	4.76635	5.69422	2.87478		12.6467	18.7493	14.1824	20.8829	19.4874	16.4331	17.4586	19.1092	18.5768	30.7375	16.2032	28.5484	16.6247	20.4251	16.5642	24.2841	13.0672	32.6826	20.7821	22.7252		5.75773	2.39341	4.46207	6.84533	6.32267	3.21885	4.11701	5.55137
6.21191	3.77836	4.51587	4.40676	3.80345	3.50159	3.33553	3.84566	4.89378	3.27261	5.02799	4.173	5.3832	4.218	4.73489	3.47372	4.67516	4.7783	5.71692	2.87279		12.6377	18.9771	14.2954	20.9404	19.4833	16.423	17.633	19.1405	18.8027	30.7355	16.298	28.5474	16.6267	20.2487	16.5773	24.3244	13.0007	32.7068	20.7902	22.699		5.8626	2.34267	4.4553	6.84364	6.35481	3.20701	4.1001	5.5446
6.26408	3.77796	4.5083	4.3749	3.80026	3.49681	3.33195	3.82176	4.89578	3.22761	5.03077	4.1734	5.38002	4.21919	4.75242	3.46018	4.75958	4.78985	5.74559	2.86125		12.6437	19.2181	14.255	20.9807	19.4813	16.428	17.5534	19.1365	18.8874	30.7335	16.3595	28.5383	16.6116	20.0773	16.6005	24.3527	12.9906	32.7502	20.7942	22.6233		5.9404	2.25471	4.46207	6.86901	6.39879	3.20362	4.10179	5.53107
6.28996	3.77398	4.51149	4.36176	3.80106	3.51234	3.32637	3.75287	4.8898	3.22642	5.04153	4.15508	5.35015	4.21242	4.76197	3.44903	4.80856	4.78467	5.76868	2.85368		12.677	19.4934	14.2641	21.0211	19.4954	16.421	17.385	19.0387	18.963	30.7305	16.3464	28.5555	16.6085	19.9674	16.5874	24.4001	12.9734	32.8006	20.775	22.5225		5.94548	2.21412	4.47391	6.92314	6.44446	3.22223	4.09502	5.51585
6.29474	3.76402	4.51069	4.40835	3.80185	3.49442	3.32797	3.71225	4.87865	3.28297	5.05228	4.13636	5.34537	4.20486	4.7564	3.44903	4.8464	4.77631	5.79457	2.87917		12.6205	19.7858	14.3125	21.0735	19.4934	16.3312	17.263	18.959	19.083	30.7143	16.3222	28.5787	16.6146	19.9381	16.6156	24.4354	12.9603	32.8621	20.65	22.4459		5.93195	2.20397	4.48237	7.04154	6.45799	3.27128	4.08826	5.49724
6.27722	3.76283	4.50034	4.43145	3.80225	3.44823	3.32996	3.71225	4.8675	3.31681	5.05228	4.15986	5.34896	4.20207	4.74803	3.43668	4.89418	4.79463	5.82165	2.86244		12.5197	19.9916	14.4325	21.128	19.4662	16.2112	17.2267	18.9368	19.1728	30.6932	16.3101	28.5978	16.6227	19.926	16.5944	24.4212	12.9694	32.9176	20.3878	22.4287		5.94209	2.20735	4.49928	7.13626	6.4749	3.27297	4.08995	5.46849
6.25452	3.76243	4.48282	4.42985	3.80225	3.40522	3.33314	3.69433	4.85078	3.33513	5.05228	4.16145	5.36329	4.20008	4.75042	3.41597	4.97821	4.85715	5.83479	2.8489		12.5025	20.0954	14.6039	21.1723	19.439	16.1628	17.1853	18.9166	19.2131	30.6851	16.308	28.6503	16.661	19.9119	16.5692	24.3627	12.9815	32.9559	20.0984	22.4328		5.96916	2.20735	4.5145	7.01279	6.48167	3.23576	4.09164	5.45834
6.26009	3.75845	4.47684	4.43463	3.80185	3.37496	3.33314	3.65053	4.81533	3.42195	5.05108	4.10291	5.37763	4.19848	4.75759	3.40124	5.07617	4.90294	5.81966	2.9154		12.5943	20.1841	14.734	21.2117	19.4027	16.1487	17.0704	18.835	19.2343	30.6811	16.306	28.6835	16.7104	19.8675	16.5783	24.3224	12.9896	32.9922	19.9149	22.4358		5.98776	2.19551	4.50774	6.86732	6.47998	3.20362	4.09164	5.49217
6.29275	3.74411	4.47684	4.42587	3.80185	3.34589	3.32797	3.60672	4.77392	3.54619	5.01485	3.97866	5.38201	4.19928	4.77472	3.38531	5.14586	4.89697	5.73284	2.94368		12.8423	20.2971	14.852	21.2853	19.3785	16.1487	16.9746	18.6807	19.2121	30.671	16.301	28.7047	16.7285	19.7324	16.5672	24.3567	13.047	33.0265	19.8716	22.4197		6.0013	2.1989	4.48406	6.8115	6.49351	3.19517	4.09164	5.526
6.32739	3.74172	4.47684	4.4199	3.80305	3.34748	3.32876	3.5673	4.76994	3.62942	4.94954	3.85044	5.37006	4.19809	4.8018	3.4546	5.19006	4.88582	5.62254	2.93372		13.1176	20.4302	14.8923	21.4345	19.3734	16.1407	16.9806	18.5526	19.1516	30.6528	16.3201	28.6563	16.7235	19.5852	16.5501	24.4101	13.1055	33.0406	19.8877	22.3944		5.9996	2.21412	4.47729	6.79797	6.51888	3.19517	4.08995	5.58689
6.3493	3.74292	4.47684	4.43861	3.80743	3.35504	3.33115	3.52588	4.7787	3.67163	4.94954	3.72022	5.35772	4.20286	4.79901	3.51752	5.23785	4.88463	5.57674	2.95642		13.2477	20.6016	14.9024	21.6231	19.3543	16.1447	17.0562	18.4589	19.1163	30.6327	16.3353	28.4647	16.7174	19.5156	16.4724	24.4616	13.1963	33.0285	19.8796	22.3965		6.05373	2.23949	4.47729	6.79966	6.52226	3.2273	4.07811	5.70529
6.35169	3.74331	4.47923	4.4649	3.81141	3.35305	3.34628	3.50717	4.7787	3.67601	5.02878	3.60593	5.35174	4.19928	4.80418	3.50876	5.30714	4.90494	5.56678	2.99146		13.2951	20.8224	15.1182	21.7915	19.316	16.1457	17.1672	18.358	19.1566	30.6115	16.3454	28.1521	16.7205	19.4632	16.2526	24.4948	13.3526	32.9962	19.8272	22.4106		6.11462	2.24457	4.47898	6.82673	6.52226	3.27974	4.03244	5.78817
6.35089	3.74013	4.47565	4.48003	3.8138	3.35743	3.33434	3.50279	4.77472	3.68	5.12914	3.58681	5.33661	4.19012	4.81772	3.51314	5.32705	4.94356	5.56838	3.00939		13.2981	21.0423	15.2705	21.9346	19.325	16.1296	17.3638	18.2179	19.2968	30.6024	16.3504	27.8668	16.7215	19.3926	15.939	24.4979	13.4272	32.972	19.7566	22.4207		6.13492	2.24964	4.47222	6.88931	6.54594	3.28481	3.98	5.84061
6.36124	3.75088	4.46689	4.4641	3.80384	3.35305	3.30925	3.49721	4.75202	3.69234	5.18807	3.56371	5.33343	4.19092	4.8452	3.51394	5.32427	4.94356	5.60183	3.01098		13.3153	21.2359	15.3027	22.1141	19.326	16.1397	17.6895	18.111	19.5781	30.5974	16.3514	27.7024	16.7225	19.3845	15.6627	24.4575	13.4131	32.963	19.7062	22.4207		6.15183	2.24964	4.47391	6.9316	6.64236	3.28312	3.96985	5.87613
6.36403	3.76123	4.47127	4.44737	3.78991	3.32677	3.31004	3.48526	4.71857	3.74371	5.21675	3.46256	5.34059	4.18853	4.89777	3.49841	5.32785	4.93719	5.63886	3.01177		13.4232	21.4214	15.3098	22.3592	19.3371	16.1588	18.0091	18.0757	20.0722	30.5732	16.3514	27.6056	16.7497	19.3936	15.582	24.4142	13.4181	32.9609	19.6921	22.4227		6.15522	2.23273	4.47391	6.92145	6.71847	3.28312	3.98677	5.85752
6.36642	3.76402	4.45534	4.44737	3.78672	3.3204	3.31642	3.4769	4.71737	3.80862	5.23427	3.34031	5.3386	4.1957	4.92803	3.4542	5.33263	4.94476	5.65917	3.01894		13.4958	21.6029	15.3158	22.6022	19.3412	16.1639	18.361	18.0545	20.526	30.5127	16.3544	27.5118	16.789	19.3654	15.572	24.3779	13.401	32.968	19.6991	22.4237		6.16029	2.20735	4.46714	6.90961	6.74046	3.28143	4.00537	5.85583
6.38354	3.76123	4.45454	4.45494	3.78951	3.31681	3.33991	3.46615	4.72812	3.84008	5.24303	3.23239	5.30953	4.20048	4.92763	3.44823	5.33781	4.94954	5.66554	3.0289		13.4544	21.8278	15.3078	22.7423	19.3422	16.1185	18.7694	18.0112	20.6117	30.4572	16.3716	27.3878	16.8001	19.32	15.5558	24.3275	13.4151	32.9741	19.7011	22.4237		6.15353	2.17352	4.46545	6.90453	6.76245	3.26959	4.00537	5.85245
6.40465	3.75088	4.45813	4.47445	3.78951	3.31363	3.37416	3.47889	4.73848	3.82535	5.24502	3.15235	5.1821	4.19609	4.92843	3.44106	5.31909	4.94755	5.65758	3.0293		13.2628	22.0909	15.3037	22.7917	19.3341	15.9803	19.2111	17.9426	20.5098	30.434	16.3988	27.2023	16.7971	19.3089	15.4913	24.2881	13.5351	32.9751	19.682	22.4237		6.11293	2.10756	4.47222	6.88254	6.77767	3.27636	3.99184	5.84061
6.39868	3.73774	4.43861	4.49675	3.79269	3.32518	3.39606	3.48606	4.74405	3.82137	5.23586	3.0962	5.03754	4.18654	4.94715	3.44425	5.30037	4.94516	5.70577	3.02651		13.0491	22.3067	15.2745	22.7998	19.3361	15.9017	19.4743	17.8165	20.5159	30.429	16.423	26.9471	16.7921	19.3099	15.5639	24.267	13.6813	32.971	19.5933	22.4247		6.12477	2.06527	4.4756	6.85886	6.77429	3.26959	3.98169	5.84568
6.36483	3.73654	4.3976	4.5314	3.7915	3.33712	3.39327	3.49402	4.74166	3.83809	5.2498	3.04642	4.95153	4.16702	5.0029	3.47053	5.26931	4.93162	5.83041	3.0277		12.9855	22.4217	15.1958	22.829	19.3472	15.8976	19.5126	17.6149	20.6702	30.43	16.4401	26.6376	16.7991	19.3008	15.5679	24.2569	13.8416	32.9599	19.4238	22.4297		6.19074	2.06189	4.4756	6.86225	6.75738	3.26282	3.98169	5.83384
6.34054	3.73216	4.37052	4.57998	3.78871	3.34031	3.38332	3.49402	4.75839	3.84088	5.25378	2.97992	4.8902	4.16702	5.07936	3.54181	5.2263	4.92445	5.99209	3.02492		13.0077	22.5104	15.093	22.9107	19.3442	15.9047	19.5086	17.4616	20.7569	30.431	16.4845	26.322	16.8263	19.3129	15.3652	24.277	13.9273	32.9287	19.2514	22.4479		6.23303	2.06865	4.48237	6.86394	6.74892	3.26282	3.98	5.79832
6.33536	3.72738	4.32751	4.5987	3.78831	3.34111	3.36221	3.4542	4.77671	3.84805	5.21157	2.90226	4.85834	4.18136	5.14387	3.66208	5.20958	4.93122	6.2585	3.01854		13.0178	22.6758	14.8802	23.0166	19.3361	15.946	19.5096	17.3809	20.8174	30.432	16.6297	26.08	16.8364	19.2897	15.2231	24.3093	13.9525	32.8742	19.0719	22.4721		6.23979	2.0788	4.5348	6.87578	6.74215	3.25944	3.96816	5.74419
6.33576	3.7246	4.3072	4.59153	3.78632	3.33872	3.3423	3.40522	4.77272	3.89026	5.16577	2.86563	4.85914	4.19729	5.17613	3.70349	5.19763	4.92445	6.55996	2.96797		13.0239	22.8865	14.737	23.1023	19.327	15.9642	19.4622	17.3114	21.0241	30.434	16.7618	25.8995	16.8445	19.2252	15.2594	24.3335	13.9425	32.8107	18.8642	22.4781		6.24656	2.08219	4.59231	6.87578	6.74723	3.25944	3.98677	5.6833
6.33616	3.73933	4.30282	4.59313	3.78513	3.33712	3.33513	3.3873	4.77392	3.93207	5.16577	2.86403	4.88263	4.19689	5.13471	3.69911	5.17573	4.90533	6.70571	2.93532		13.0218	23.0267	14.7562	23.1779	19.3008	15.9571	19.4097	17.2377	21.3064	30.434	16.7618	25.7724	16.8737	19.2071	15.3733	24.3678	13.8336	32.7442	18.7593	22.4902		6.27024	2.08388	4.62276	6.891	6.74385	3.26113	4.07811	5.63594
6.33456	3.76362	4.28609	4.61821	3.78353	3.3415	3.33115	3.3642	4.78387	3.97827	5.17533	2.86602	4.90732	4.1957	5.11679	3.70628	5.16617	4.88861	6.74394	2.91381		13.0208	23.0942	14.5999	23.2737	19.2494	15.9642	19.3523	17.151	21.4325	30.432	16.7618	25.7039	16.9252	19.2091	15.4005	24.4101	13.6712	32.6998	18.7644	22.5074		6.28208	2.08388	4.6532	6.87578	6.7337	3.27974	4.1593	5.61564
6.33496	3.76362	4.25901	4.67118	3.78075	3.34111	3.31642	3.3642	4.78387	4.03481	5.1809	2.88912	4.92405	4.18056	5.14984	3.69035	5.16378	4.88861	6.76584	2.89788		12.9865	23.1658	14.2893	23.3998	19.2161	15.9491	19.2928	17.0562	21.4365	30.433	16.7578	25.5929	16.9917	19.1939	15.4106	24.4192	13.5764	32.6847	18.7049	22.4943		6.28546	2.0788	4.67857	6.85886	6.72186	3.30849	4.20497	5.59196
6.33894	3.81698	4.25702	4.70304	3.77716	3.34111	3.30965	3.38053	4.7771	4.06548	5.17891	2.92855	4.94476	4.14831	5.21555	3.66685	5.15422	4.88383	6.76345	2.89549		12.9734	23.2606	14.0645	23.552	19.2111	15.9097	19.2544	16.9957	21.38	30.434	16.7547	25.3207	17.1178	19.1203	15.4731	24.393	13.5895	32.6766	18.6071	22.46		6.28546	2.06189	4.69549	6.84872	6.72017	3.31357	4.22865	5.59873
6.34412	3.89703	4.27574	4.70104	3.77716	3.33752	3.31522	3.38013	4.77392	4.07742	5.17652	2.90505	4.97542	4.10052	5.35135	3.65889	5.14228	4.89259	6.7738	2.90306		12.9754	23.3645	13.9848	23.6922	19.2282	15.9198	19.195	16.9756	21.2953	30.426	16.7467	25.1039	17.2428	19.1123	15.5306	24.3789	13.6228	32.6665	18.5143	22.4398		6.29223	2.05681	4.73101	6.84195	6.72186	3.29158	4.22865	5.59027
6.3477	3.96911	4.29008	4.7114	3.77597	3.33354	3.32159	3.37774	4.79781	4.10291	5.18807	2.83735	5.00688	4.08021	5.56559	3.68238	5.1379	4.91609	6.82876	2.92337		12.9664	23.4865	13.9324	23.8535	19.2363	16.0176	19.1516	16.9756	21.2671	30.3957	16.7084	25.0202	17.3114	19.1163	15.5911	24.3537	13.64	32.6453	18.478	22.4539		6.29561	2.05681	4.77837	6.85379	6.7337	3.2865	4.24387	5.53276
6.35129	4.06747	4.31516	4.72773	3.77039	3.34031	3.32597	3.37695	4.88104	4.1272	5.18329	2.78757	5.01246	4.06826	5.81169	3.74053	5.13471	4.94715	6.90124	2.93452		12.9553	23.6327	13.9384	24.0471	19.2	16.1175	19.1304	16.9725	21.2772	30.3876	16.6942	24.9204	17.3809	19.1183	15.6889	24.3113	13.641	32.6181	18.475	22.4761		6.29899	2.05005	4.78175	6.84872	6.73201	3.29665	4.25909	5.50739
6.35089	4.15229	4.36614	4.72892	3.77238	3.34031	3.32558	3.35425	4.95352	4.10968	5.14387	2.75811	4.99055	4.05871	6.17169	3.7919	5.1367	4.96626	6.98327	2.93014		12.9442	23.787	14.1391	24.2186	19.1708	16.187	19.1455	16.9826	21.2711	30.3997	16.6963	24.8074	17.4989	19.1193	15.7414	24.2942	13.6359	32.5969	18.4911	22.5003		6.32436	2.05343	4.7733	6.83857	6.73031	3.33556	4.25909	5.54291
6.33177	4.16025	4.42985	4.71498	3.7688	3.34031	3.32996	3.34549	5.01365	4.13238	5.08095	2.74616	4.95392	4.06588	6.58266	3.86358	5.14745	4.96825	7.05694	2.9377		12.9381	23.9483	14.493	24.3224	19.1839	16.2536	19.202	17.026	21.256	30.4078	16.6902	24.761	17.5887	19.1103	15.698	24.2962	13.644	32.5798	18.5355	22.5286		6.36496	2.03313	4.77499	6.84533	6.7337	3.37277	4.26417	5.59873
6.31983	4.13437	4.45494	4.67118	3.74132	3.33593	3.32677	3.40203	5.0702	4.22755	5.01285	2.74457	4.90852	4.07225	6.86141	3.93844	5.15064	4.9571	7.1565	2.95324		12.921	24.1097	14.7451	24.4071	19.195	16.3232	19.2454	17.0683	21.2248	30.4118	16.7406	24.7217	17.6088	19.0639	15.6345	24.2962	13.6389	32.5566	18.5829	22.5407		6.38526	2.02637	4.82911	6.90623	6.73539	3.37953	4.28108	5.68499
6.31983	4.10888	4.44737	4.63773	3.68557	3.33155	3.32558	3.41358	5.1371	4.27096	4.94197	2.74815	4.84719	4.10092	7.00756	3.96592	5.13192	4.93361	7.30305	2.95324		12.927	24.2841	14.8308	24.5211	19.1697	16.422	19.2484	17.0341	21.2419	30.4088	16.902	24.6602	17.6088	18.9761	15.6214	24.2942	13.5986	32.5122	18.6394	22.5397		6.37342	2.03144	4.89339	6.9908	6.7134	3.37953	4.31491	5.74927
6.32102	4.07623	4.43662	4.63773	3.61947	3.30885	3.32558	3.37575	5.19325	4.27056	4.8687	2.74656	4.77671	4.13756	7.11269	3.94641	5.12157	4.92803	7.38946	2.95045		13.0097	24.4606	14.8076	24.6552	19.078	16.5511	19.2071	16.9413	21.3206	30.3997	17.1389	24.6148	17.6139	18.9217	15.6093	24.2992	13.5411	32.4427	18.6827	22.5366		6.34466	2.03144	4.92553	7.01279	6.69987	3.37953	4.38934	5.74927
6.31824	4.08061	4.41193	4.65047	3.56292	3.29969	3.3212	3.35942	5.21555	4.28649	4.80379	2.74337	4.72613	4.12521	7.17283	3.92052	5.14506	4.93002	7.38946	2.95523		13.0521	24.5977	14.8832	24.7308	18.9903	16.666	19.1738	16.9453	21.3972	30.3997	17.2065	24.5795	17.6129	18.9116	15.5911	24.269	13.4685	32.3822	18.6878	22.5397		6.32267	2.02298	4.94583	7.0111	6.70325	3.38461	4.54326	5.74588
6.31664	4.11565	4.37012	4.66122	3.50279	3.29889	3.31681	3.35226	5.22391	4.29047	4.77352	2.737	4.68671	4.06229	7.18119	3.93924	5.19484	4.93002	7.38189	2.96319		13.0571	24.6814	15.1807	24.7278	18.964	16.7769	19.1708	16.8273	21.4446	30.4018	17.2256	24.5332	17.628	18.9096	15.581	24.1903	13.41	32.358	18.6464	22.5326		6.3176	2.02637	4.94244	7.01448	6.70663	3.3863	4.70564	5.73235
6.32023	4.12561	4.38923	4.66122	3.47372	3.29889	3.31761	3.3435	5.21993	4.29127	4.78945	2.72545	4.69746	3.98822	7.16964	3.97787	5.24303	4.93679	7.38548	2.95921		13.0531	24.75	15.697	24.7268	18.961	16.906	19.1778	16.2949	21.4436	30.3987	17.3456	24.511	17.6976	18.9106	15.6758	24.1197	13.4373	32.3549	18.6051	22.5084		6.32436	2.0602	4.92891	7.02463	6.7134	3.3863	4.77668	5.71206
6.33217	4.12003	4.47844	4.67556	3.48327	3.30089	3.31801	3.3435	5.21515	4.29326	4.8906	2.70514	4.76994	3.94601	7.17083	4.0384	5.27927	4.94675	7.39304	2.95363		13.0259	24.8105	16.2929	24.7621	18.961	17.0381	19.1506	15.9118	21.4365	30.3876	17.5009	24.5281	17.8155	18.9287	16.1023	24.0895	13.5008	32.361	18.6101	22.4973		6.35143	2.07542	4.92553	7.02632	6.72524	3.40491	4.76991	5.75603
6.34332	4.12521	4.64051	4.6887	3.46894	3.29889	3.31443	3.34827	5.21117	4.32074	4.99812	2.67886	4.81095	3.94243	7.26601	4.16702	5.31152	4.94277	7.41495	2.94607		12.9815	24.8679	16.6247	24.8437	18.965	17.152	19.1607	15.8089	21.4375	30.3705	17.6098	24.5795	17.9315	18.9388	16.6862	24.0855	13.5653	32.3701	18.6071	22.5155		6.3565	2.07035	4.92891	7.03478	6.72862	3.43028	4.74792	5.78817
6.36204	4.11844	4.80458	4.69826	3.43509	3.29929	3.3208	3.36181	5.20998	4.34981	5.09091	2.65696	4.82131	3.94561	7.45756	4.28808	5.35135	4.93201	7.46552	2.95961		12.9452	24.9718	16.6912	24.9426	18.962	17.2781	19.2252	15.7494	21.4486	30.3423	17.629	24.6481	17.9103	18.8945	17.1581	24.0834	13.6268	32.368	18.5859	22.5366		6.35143	2.07373	4.94244	7.0703	6.70494	3.4658	4.71579	5.80001
6.38275	4.11844	4.85516	4.70981	3.40164	3.27978	3.35704	3.36261	5.21993	4.3522	5.15741	2.66134	4.82171	3.94083	7.64432	4.31437	5.41347	4.90772	7.52406	2.97275		12.9119	25.1099	16.7245	25.0121	18.9277	17.4414	19.2091	15.7091	21.5142	30.2979	17.6371	24.6511	17.8034	18.841	17.5614	24.0663	13.6662	32.3257	18.5627	22.5739		6.3565	2.10925	4.94413	7.1092	6.68295	3.47764	4.65151	5.8626
6.38952	4.12362	4.85516	4.71618	3.39009	3.21965	3.40442	3.35903	5.24701	4.3526	5.1363	2.65258	4.84082	3.90659	7.87091	4.29605	5.50307	4.87865	7.56786	2.9381		12.8786	25.2259	16.7991	25.0535	18.9126	17.6118	19.1445	15.7051	21.6231	30.2455	17.6723	24.5422	17.7651	18.8209	17.9143	24.033	13.6904	32.2269	18.601	22.6697		6.3565	2.15661	4.94413	7.14641	6.66604	3.47933	4.56694	5.98607
6.40226	4.10251	4.89339	4.71618	3.38849	3.21686	3.45141	3.34628	5.2932	4.37729	5.09569	2.62709	4.89976	3.86756	8.19308	4.29804	5.55802	4.87348	7.61366	2.91182		12.8746	25.2955	16.8152	25.0817	18.9197	17.7823	19.2706	15.701	21.7269	30.2011	17.6925	24.4495	17.7732	18.8088	17.99	24.0078	13.6904	32.1059	18.7009	22.7917		6.34297	2.20735	4.94583	7.18362	6.63898	3.49624	4.5551	6.11801
6.40903	4.00853	4.92445	4.71458	3.37177	3.20611	3.50956	3.32876	5.39475	4.38525	5.05626	2.63028	4.93321	3.84526	8.51445	4.30242	5.59187	4.86233	7.65627	2.92297		12.8978	25.3287	16.7991	25.1079	18.9227	17.9577	19.3523	15.6879	21.7794	30.1356	17.6814	24.4212	17.8246	18.7936	18.0404	24.0048	13.7156	32.0202	18.8198	22.8895		6.32098	2.23949	4.96105	7.19716	6.62037	3.50132	4.58047	6.19581
6.40784	3.95875	4.91967	4.71339	3.37575	3.19575	3.58761	3.31124	5.51741	4.40158	5.02839	2.64222	4.981	3.84685	8.71157	4.27893	5.65877	4.78706	7.69729	2.92695		12.9997	25.3499	16.8011	25.1321	18.9227	18.1473	19.3553	15.693	21.7824	30.0236	17.6643	24.4021	17.8639	18.7856	18.4931	24.0179	13.7136	31.9768	18.9872	22.9561		6.29561	2.24795	5.02871	7.20054	6.61699	3.48271	4.58554	6.1975
6.4154	3.97588	4.90812	4.74724	3.38451	3.20611	3.66885	3.29651	5.58351	4.44658	5.01485	2.63943	5.0925	3.85163	8.7936	4.27176	5.73683	4.69228	7.73791	2.95443		13.3475	25.3892	16.8072	25.1684	18.9166	18.3812	19.3341	15.697	21.7814	29.9026	17.6613	24.3799	17.8579	18.7936	18.7503	24.0139	13.6823	31.9455	19.1566	22.9914		6.29899	2.25641	5.10651	7.209	6.61022	3.48271	4.5737	6.18397
6.40346	4.03043	4.91409	4.76954	3.46018	3.20611	3.72738	3.2985	5.60979	4.48242	5.0025	2.65098	5.16657	3.86676	8.83223	4.27255	5.75554	4.67078	7.73512	2.9843		13.7418	25.4366	16.8979	25.236	18.9217	18.5728	19.3805	15.6849	21.7844	29.7756	17.6461	24.397	17.8538	18.7926	18.7644	24.0068	13.7378	31.9163	19.2524	23.0106		6.32775	2.29531	5.13358	7.20223	6.58823	3.48779	4.56525	6.18397
6.39748	4.06986	4.93002	4.77392	3.54221	3.18779	3.76721	3.29929	5.62373	4.49357	4.99573	2.7139	5.20042	3.87313	8.85294	4.26778	5.75714	4.67237	7.76658	3.02253		13.8648	25.477	16.9584	25.2793	18.9429	18.7109	19.4561	15.6809	21.7652	29.5991	17.6774	24.4192	17.8075	18.7785	18.7735	24.0159	13.9051	31.8911	19.2393	23.0186		6.33282	2.38327	5.14711	7.19885	6.56286	3.49455	4.56694	6.18905
6.45881	4.09773	4.95631	4.78109	3.61986	3.17146	3.7919	3.31084	5.62254	4.49118	4.98498	2.75213	5.23546	3.87274	8.87205	4.31516	5.75953	4.67317	7.86335	3.06553		13.887	25.5334	16.9191	25.233	18.9378	18.8914	19.4985	15.6829	21.7199	29.3995	17.7823	24.4162	17.7954	18.7785	18.834	24.031	14.0594	31.8719	19.2333	23.0247		6.33451	2.43232	5.16064	7.20731	6.55609	3.47087	4.57032	6.19412
6.56155	4.1491	4.99095	4.79025	3.70031	3.17505	3.79986	3.33593	5.61736	4.49237	4.98139	2.75054	5.2486	3.86955	8.88838	4.36335	5.73762	4.66122	7.95892	3.12049		13.8971	25.598	16.8384	25.1099	18.9267	19.1012	19.5358	15.6768	21.6785	29.2593	17.8115	24.4071	17.7994	18.7866	18.8955	24.0481	14.1431	31.8477	19.2847	23.0287		6.33959	2.43739	5.15557	7.20223	6.55779	3.42859	4.58385	6.19243
6.63084	4.19331	5.00051	4.78069	3.74292	3.20093	3.79946	3.3192	5.61577	4.47764	4.98259	2.782	5.21555	3.86278	8.88838	4.3753	5.69979	4.61184	8.09949	3.12368		13.9001	25.6343	16.7739	24.9879	18.9207	19.2403	19.6447	15.6839	21.6553	29.1635	17.8538	24.3829	17.7288	18.7977	18.9267	24.0602	14.1824	31.8225	19.3028	23.0358		6.34297	2.44077	5.14373	7.19885	6.56963	3.41844	4.60077	6.21273
6.6623	4.20127	4.98856	4.77511	3.7688	3.2296	3.80822	3.28655	5.61497	4.46211	4.979	2.81346	5.18568	3.86636	8.87564	4.37649	5.66037	4.62538	8.26675	3.10257		13.9888	25.6444	16.7537	24.9143	18.9076	19.3361	19.7082	15.7242	21.6503	29.0435	17.998	24.3446	17.4797	18.835	18.9368	24.0794	14.1855	31.8165	19.1697	23.0821		6.3362	2.456	5.14373	7.22591	6.595	3.42013	4.59908	6.2381
6.68142	4.20207	4.97184	4.77472	3.81141	3.25509	3.84327	3.26584	5.61417	4.48122	4.97861	2.86523	5.17732	3.84924	8.86409	4.38605	5.60422	4.68034	8.38104	3.08186		14.1159	25.6474	16.8011	24.877	18.8148	19.4329	19.7173	15.7303	21.6513	28.8832	18.1201	24.3355	17.1793	18.8834	18.9408	24.1218	14.1895	31.8477	18.9267	23.2102		6.34128	2.46784	5.13865	7.23099	6.58485	3.41844	4.59908	6.25671
6.69376	4.20008	4.96387	4.75082	3.86955	3.26425	3.87353	3.20611	5.61099	4.49476	4.97861	2.89271	5.18529	3.813	8.85811	4.39481	5.57435	4.69268	8.47024	3.06912		14.2117	25.6716	16.9423	24.877	18.7412	19.5116	19.7223	15.7182	21.6815	28.6603	18.1513	24.3416	17.0048	18.8914	18.9449	24.1702	14.1885	31.8992	18.717	23.3554		6.35481	2.46107	5.11497	7.23437	6.5747	3.41675	4.60415	6.28377
6.70411	4.20525	4.96148	4.72892	3.92251	3.26226	3.89583	3.11571	5.58749	4.46052	4.97821	2.91142	5.2036	3.78114	8.85493	4.39481	5.61457	4.69427	8.5686	3.06753		14.2712	25.7351	17.0562	24.9032	18.7362	19.5892	19.7243	15.7383	21.7098	28.4143	18.1634	24.3426	16.9332	18.8541	18.9479	24.1974	14.1673	31.9405	18.5859	23.432		6.37511	2.44754	5.09467	7.24113	6.5747	3.39814	4.60077	6.32267
6.73159	4.19769	4.94954	4.74047	3.96831	3.26385	3.92729	3.10257	5.52218	4.49437	4.99294	2.94885	5.25657	3.73734	8.85493	4.39123	5.67032	4.69348	8.64307	3.06235		14.3125	25.8178	17.0996	24.878	18.7341	19.7011	19.7243	15.8523	21.6876	28.2136	18.2048	24.3436	16.9171	18.8219	18.9388	24.2075	14.1703	31.9697	18.5325	23.4653		6.38356	2.43232	5.06423	7.24959	6.58823	3.37784	4.61261	6.34635
6.74673	4.15587	4.91847	4.76715	3.98583	3.26743	3.97627	3.1412	5.42502	4.52503	5.03715	2.97315	5.32227	3.74132	8.84935	4.40238	5.71254	4.69706	8.66179	3.06474		14.3619	25.7956	17.1621	24.7116	18.713	19.8131	19.7495	15.9995	21.6664	28.018	18.23	24.3436	16.9231	18.837	18.9378	24.2115	14.1976	31.9879	18.5446	23.4845		6.38018	2.41709	5.01517	7.25974	6.60176	3.37953	4.66843	6.35988
6.74752	4.13915	4.88741	4.78507	3.9926	3.27659	4.0149	3.18779	5.37683	4.50791	5.03715	2.97275	5.33343	3.80106	8.84975	4.41273	5.73006	4.69666	8.67214	3.06315		14.4083	25.6897	17.2025	24.4918	18.6807	19.9079	19.8494	16.0882	21.7471	27.7417	18.229	24.3295	16.9262	18.8713	18.9277	24.2206	14.2147	31.9909	18.5627	23.5147		6.37172	2.40525	4.97289	7.27666	6.58654	3.37953	4.70056	6.40725
6.74792	4.12003	4.86471	4.79104	3.98942	3.30845	4.02446	3.19934	5.36369	4.50591	5.01405	2.97235	5.31391	3.84884	8.85493	4.3976	5.73006	4.69627	8.68369	3.05916		14.4365	25.6524	17.2085	24.3849	18.6182	20.0188	19.9835	16.1608	21.8499	27.3999	18.2128	24.3083	16.9262	18.9166	18.9076	24.2407	14.1986	31.9758	18.5647	23.5863		6.38018	2.39341	4.92891	7.27666	6.60853	3.36939	4.69887	6.48167
6.74633	4.1045	4.85356	4.78786	3.98942	3.32836	4.02327	3.21328	5.34657	4.50671	5.03715	2.9843	5.31272	3.85123	8.85533	4.38207	5.71214	4.72374	8.68608	3.05797		14.4476	25.6363	17.2085	24.3849	18.4851	20.1438	20.0793	16.2395	21.86	27.0772	18.2219	24.3254	16.8838	18.965	18.8924	24.2579	14.1199	31.9546	18.5274	23.672		6.39371	2.39341	4.82404	7.2682	6.60684	3.37277	4.70902	6.52903
6.74712	4.09375	4.84401	4.76795	3.99937	3.33035	4.038	3.26584	5.34896	4.50671	5.08095	2.99903	5.28843	3.76681	8.87006	4.38286	5.69063	4.82688	8.69444	3.07668		14.4497	25.5748	17.2115	24.4081	18.3278	20.2436	20.0833	16.2798	21.855	26.8282	18.2249	24.3063	16.7628	19.0155	18.8309	24.2589	13.9929	31.9546	18.4205	23.7315		6.39541	2.39341	4.73101	7.2682	6.61529	3.38123	4.73608	6.53918
6.75111	4.06149	4.83405	4.7779	4.02088	3.33075	4.04835	3.3423	5.35334	4.52583	5.10166	3.01217	5.26453	3.70787	8.93378	4.37769	5.68267	4.91887	8.72112	3.11093		14.4587	25.5334	17.2428	24.1399	18.234	20.3818	19.9421	16.3	21.8661	26.6961	18.2229	24.2286	16.5732	19.0608	18.7704	24.2589	13.772	31.9758	18.2763	23.7719		6.39541	2.39511	4.7141	7.2682	6.61868	3.35247	4.74792	6.53072
6.76265	4.04756	4.84998	4.79343	4.05512	3.33473	4.04955	3.39686	5.35453	4.53817	5.11042	3.05916	5.29241	3.70508	8.97559	4.33786	5.66793	5.00569	8.74064	3.1185		14.4779	25.5466	17.2892	23.2778	18.2269	20.5542	19.7516	16.3302	21.8651	26.6023	18.2088	24.1681	16.3282	19.0881	18.7402	24.267	13.3637	32.006	18.1997	23.7618		6.39541	2.41033	4.70733	7.2682	6.61529	3.26959	4.74623	6.52057
6.75509	4.05871	4.87387	4.81056	4.11645	3.33673	4.0611	3.4088	5.37484	4.53817	5.12476	3.07549	5.32466	3.71663	8.97997	4.33308	5.6536	5.07976	8.76214	3.1177		14.5011	25.5738	17.4414	22.3944	18.1503	20.7024	19.5862	16.3403	21.855	26.4047	18.1836	24.1651	16.1749	19.1062	18.7472	24.2791	13.036	32.0333	18.1967	23.674		6.39371	2.41879	4.69041	7.26481	6.55271	3.23407	4.74454	6.50535
6.74394	4.06508	4.87945	4.83087	4.15388	3.33633	4.06269	3.40681	5.40829	4.54414	5.13471	3.0727	5.32666	3.72181	8.97519	4.36176	5.64683	5.09608	8.7928	3.1181		14.5061	25.604	17.7238	21.9044	17.8317	20.8476	19.447	16.3484	21.86	26.0447	18.1614	24.1812	16.0973	19.1405	18.8138	24.2801	12.9986	32.0191	18.2007	23.5843		6.38526	2.40356	4.67519	7.26651	6.42754	3.23745	4.74116	6.48336
6.76146	4.13636	4.87547	4.88901	4.14313	3.31602	4.05592	3.41119	5.48236	4.54852	5.14148	3.07111	5.3163	3.72141	8.97479	4.40437	5.66037	5.09688	8.80515	3.11969		14.5102	25.6292	17.8266	21.6241	17.5312	21.0342	19.3321	16.3494	21.863	25.6565	18.1816	24.1984	15.8724	19.1708	18.8783	24.269	12.9714	31.9919	18.1695	23.5409		6.32267	2.39511	4.64982	7.2885	6.30237	3.23576	4.68196	6.4563
6.77818	4.20008	4.86432	4.9583	4.13278	3.29292	4.05711	3.39765	5.59785	4.54972	5.14148	3.0731	5.27887	3.72778	8.974	4.42109	5.66754	5.09688	8.78524	3.12168		14.5061	25.6484	17.8266	21.4032	17.3567	21.2278	19.2968	16.3474	21.854	25.3126	18.1826	24.2236	15.3118	19.1708	18.9096	24.2549	12.9149	32.006	18.1533	23.5349		6.25163	2.39172	4.7124	7.28173	6.26009	3.22899	4.62783	6.43938
6.77818	4.19291	4.84002	4.99533	4.13118	3.28376	4.05711	3.37057	5.70019	4.54972	5.14467	3.07668	5.21913	3.75247	8.97001	4.41512	5.66793	5.10166	8.76413	3.12925		14.4204	25.6665	17.8246	21.2137	17.2277	21.3609	19.322	16.3383	21.8429	25.001	18.1745	24.2458	14.8217	19.1647	18.9398	24.2498	12.8444	32.0444	18.118	23.5319		6.19581	2.37988	4.80713	7.25297	6.28884	3.21885	4.63121	6.43093
6.77699	4.15269	4.83525	5.026	4.13079	3.28018	4.05393	3.3658	5.75953	4.55848	5.15343	3.05996	5.14068	3.77995	8.97081	4.41353	5.66754	5.18529	8.76294	3.13761		14.2248	25.6928	17.8639	21.0191	17.152	21.4527	19.325	16.3151	21.8691	24.7026	18.1826	24.2629	14.616	19.1526	18.9499	24.2458	12.6447	32.0625	18.0354	23.5097		6.19074	2.38834	4.82573	7.23606	6.30745	3.21885	4.64813	6.42923
6.76982	4.10769	4.83923	5.05228	4.12959	3.27978	4.08021	3.34628	5.80532	4.55649	5.159	3.04323	5.04153	3.78114	8.96245	4.42906	5.66435	5.28006	8.76254	3.1189		14.1552	25.6827	18.0233	20.8184	17.1268	21.5384	19.3099	16.2566	21.9014	24.4162	18.2138	24.276	14.5515	19.1435	18.9449	24.2417	12.4138	32.0827	18.0233	23.4522		6.20089	2.39341	4.82742	7.23268	6.30576	3.20531	4.64475	6.42754
6.76584	4.10331	4.84401	5.0929	4.13795	3.27699	4.15906	3.3204	5.85311	4.55091	5.15661	3.04841	4.96905	3.78114	8.94572	4.44897	5.65678	5.28962	8.76891	3.11412		14.2258	25.603	18.1311	20.6369	17.1188	21.5898	19.3432	16.2052	21.9508	24.1429	18.2985	24.2912	14.5313	19.1617	18.964	24.2518	12.2978	32.0897	17.992	23.4139		6.20089	2.37142	4.82911	7.23099	6.23979	3.19178	4.63798	6.46306
6.74911	4.1045	4.84361	5.12316	4.1495	3.27699	4.21362	3.31204	5.8766	4.54534	5.16975	3.09301	4.93361	3.78194	8.91984	4.43423	5.65678	5.29958	8.77847	3.11332		14.3206	25.5445	18.1765	20.527	17.1278	21.61	19.4249	16.2012	22.0567	23.8687	18.4044	24.3234	14.5303	19.1677	19.0266	24.269	12.2857	32.0494	17.9496	23.4411		6.20765	2.34436	4.82911	7.22253	6.16706	3.19178	4.62783	6.57639
6.7292	4.10211	4.8452	5.12197	4.13716	3.26146	4.2176	3.31363	5.87939	4.44857	5.18847	3.16071	4.92325	3.77238	8.91108	4.42308	5.66873	5.32865	8.78325	3.10496		14.3508	25.5173	18.2784	20.4786	17.1369	21.6876	19.4551	16.2264	22.2392	23.5651	18.4457	24.3789	14.5525	19.1163	19.0225	24.267	12.2787	31.9657	17.9375	23.4794		6.22626	2.3376	4.86463	7.23775	6.11462	3.1884	4.60753	6.74723
6.73956	4.08818	4.88901	5.11321	4.12043	3.24394	4.21601	3.32159	5.87939	4.33667	5.21874	3.22841	4.88383	3.7011	8.91785	4.42945	5.699	5.33064	8.78564	3.09062		14.2893	25.4971	18.4246	20.4614	17.1379	21.7945	19.4601	16.2657	22.4176	23.2798	18.4468	24.4222	14.6009	19.0528	18.9721	24.2508	12.2666	31.8356	17.9254	23.4845		6.23979	2.33421	4.95259	7.26312	6.03512	3.18163	4.58385	6.91807
6.73557	4.06866	4.91131	5.11599	4.09256	3.26943	4.21441	3.32876	5.88576	4.30879	5.27608	3.26027	4.846	3.65212	8.91944	4.43742	5.69621	5.31829	8.79121	3.08027		14.2752	25.48	18.4861	20.4625	17.1248	21.8802	19.5045	16.307	22.4792	23.0569	18.4044	24.4626	14.6917	18.9953	18.955	24.2266	12.2666	31.7005	17.9093	23.4845		6.25501	2.34267	5.03547	7.26481	5.91841	3.18163	4.56356	7.00095
6.71765	4.07543	4.91131	5.10007	4.03601	3.3192	4.20565	3.33314	5.89174	4.31477	5.30236	3.25589	4.79821	3.66685	8.92024	4.44777	5.66475	5.31232	8.7944	3.08186		14.3045	25.4618	18.4962	20.4635	16.9877	21.9397	19.445	16.3161	22.4781	22.8391	18.2935	24.5019	14.8348	18.9812	18.9489	24.2024	12.2686	31.6088	17.9022	23.4694		6.27024	2.37481	5.07607	7.28173	5.84568	3.18163	4.53988	7.02125
6.69217	4.09893	4.9137	5.04073	3.99061	3.34827	4.19769	3.35903	5.89094	4.31477	5.27051	3.25628	4.77631	3.66646	8.93338	4.43662	5.65201	5.31909	8.78086	3.06872		14.3135	25.4296	18.4034	20.4625	16.6983	21.9851	19.3775	16.3322	22.6052	22.5669	18.2642	24.5059	14.8681	19.0447	18.9439	24.1823	12.2646	31.5553	17.9063	23.3907		6.27024	2.39172	5.09806	7.33586	5.79832	3.17994	4.51619	7.05
6.68062	4.10968	4.92286	4.979	3.96592	3.36102	4.2184	3.41757	5.89452	4.32074	5.23188	3.24354	4.78786	3.67243	8.96046	4.42468	5.64484	5.34975	8.75139	3.07629		14.3075	25.3963	18.3177	20.4675	16.3212	22.0607	19.3835	16.3201	22.7847	22.2825	18.2642	24.4737	14.6281	19.1466	18.9439	24.15	12.2121	31.5099	17.9224	23.2808		6.27531	2.39003	5.08791	7.37138	5.77295	3.16979	4.50097	7.13965
6.68619	4.10649	4.92644	4.94277	3.95995	3.40642	4.2403	3.44664	5.89811	4.33866	5.19325	3.25947	4.78666	3.69473	8.98236	4.42229	5.6305	5.36488	8.72789	3.07947		14.3216	25.3852	18.3298	20.4382	16.0065	22.2069	19.4158	16.2324	22.8553	22.0103	18.2642	24.4475	14.3619	19.2212	18.9116	24.1016	12.1173	31.4434	17.9668	23.185		6.277	2.39003	5.07268	7.32909	5.7831	3.17487	4.48406	7.20054
6.69177	4.10729	4.92604	4.97303	3.95159	3.5	4.24428	3.45898	5.89094	4.37729	5.15383	3.32558	4.78666	3.69632	8.98475	4.40835	5.67112	5.37683	8.7036	3.0735		14.3518	25.3782	18.3167	20.4161	15.7353	22.3178	19.4823	16.1185	22.824	21.7108	18.2673	24.4485	14.2278	19.2353	18.8753	24.0613	12.0639	31.3405	18.0505	23.0832		6.277	2.38327	5.07776	7.28004	5.76957	3.20024	4.45868	7.1887
6.69097	4.09534	4.92684	5.03993	3.92331	3.53783	4.25065	3.49801	5.88457	4.43344	5.1144	3.34987	4.79224	3.69831	8.97599	4.38127	5.74559	5.3828	8.64427	3.0743		14.2903	25.354	18.2965	20.4181	15.4046	22.3531	19.5842	15.9995	22.7817	21.3629	18.2592	24.4585	13.9888	19.1486	18.9267	24.0088	12.0256	31.2064	18.1281	22.9541		6.27869	2.37819	5.09636	7.27835	5.7036	3.22561	4.46038	7.15318
6.69575	4.0603	4.92166	5.06383	3.89026	3.53345	4.26778	3.58044	5.88337	4.48322	5.10126	3.35942	4.79104	3.69831	8.96484	4.37131	5.8097	5.38161	8.58453	3.08385		14.1865	25.3025	18.357	20.3929	15.2967	22.3733	19.679	15.8382	22.703	20.9999	18.2592	24.4686	13.9051	19.0175	19.0003	23.914	11.9721	31.0884	18.1533	22.8301		6.28208	2.37481	5.11835	7.24959	5.61395	3.24591	4.47729	7.16164
6.69973	4.04278	4.92246	5.05029	3.87552	3.54181	4.28729	3.68876	5.88457	4.51149	5.1144	3.35544	4.78905	3.69592	8.93298	4.37131	5.83917	5.3625	8.57458	3.11213		14.1552	25.238	18.4064	20.2719	15.3431	22.4055	19.7173	15.7202	22.5296	20.6843	18.36	24.4727	13.9384	18.9045	19.0175	23.793	11.9187	30.9876	18.1251	22.7343		6.28377	2.38157	5.10651	7.19716	5.54798	3.26621	4.48744	7.21915
6.69296	4.03521	4.92286	5.03993	3.86676	3.57088	4.30362	3.76004	5.8766	4.52981	5.12515	3.35305	4.77392	3.68477	8.87603	4.37131	5.83837	5.34537	8.57418	3.13045		14.1391	25.1946	18.4064	20.0561	15.2604	22.4479	19.7193	15.6728	22.3037	20.3788	18.4901	24.4797	13.771	18.8017	19.0296	23.671	11.9389	30.8656	18.0888	22.6496		6.28546	2.40864	5.06592	7.16671	5.51415	3.29158	4.46714	7.25974
6.69018	4.02008	4.91768	5.04551	3.85482	3.59716	4.32193	3.77278	5.86187	4.53538	5.14108	3.34987	4.76874	3.68438	8.82586	4.37251	5.86744	5.35055	8.56741	3.14		14.1532	25.1835	18.4004	19.8393	15.212	22.4882	19.7243	15.6556	22.1373	19.9835	18.5284	24.4999	13.5432	18.7583	19.0729	23.5732	12.0246	30.6942	18.0575	22.5689		6.28208	2.46784	5.04055	7.1684	5.49555	3.35078	4.44515	7.25805
6.69735	4.02247	4.91768	5.06781	3.85601	3.60075	4.34344	3.76482	5.85709	4.53459	5.14467	3.39447	4.78905	3.68517	8.80316	4.38605	5.93435	5.35453	8.57059	3.17385		14.1643	25.1775	18.3348	19.6235	15.1343	22.4872	19.7253	15.6778	22.1172	19.5721	18.5254	24.509	13.4191	18.7684	19.0871	23.542	12.1264	30.4895	18.0354	22.4892		6.27193	2.51012	5.03716	7.20223	5.49217	3.41675	4.435	7.34262
6.72164	4.07344	4.93918	5.04113	3.86676	3.61867	4.35977	3.76561	5.8555	4.54733	5.14307	3.40203	4.85356	3.68238	8.79878	4.40038	6.01917	5.34975	8.57298	3.21208		14.0856	25.1452	18.2784	19.4289	14.8883	22.4368	19.6921	15.7474	22.1091	19.2776	18.5254	24.4959	13.3949	18.7785	19.075	23.548	12.1163	30.2969	18.0323	22.3713		6.27024	2.50505	5.05239	7.27327	5.52261	3.41844	4.42486	7.58619
6.75708	4.17021	4.96825	5.05586	3.87552	3.70309	4.36693	3.76402	5.84156	4.55848	5.14666	3.40442	4.89737	3.69951	8.80236	4.38366	6.1028	5.34776	8.57458	3.21009		13.9354	25.0242	18.2844	19.3361	14.4234	22.4065	19.6154	15.8089	22.0819	19.0719	18.5214	24.4727	13.279	18.7896	19.078	23.5117	12.1022	30.1245	17.998	22.1898		6.27193	2.50336	5.049	7.26481	5.54629	3.41675	4.41978	7.69783
6.78774	4.28808	4.9794	5.06661	3.92291	3.77318	4.36892	3.74889	5.82523	4.56684	5.14467	3.40084	4.90971	3.71225	8.80037	4.34862	6.17328	5.3159	8.57736	3.2308		13.7005	24.8972	18.3167	19.3321	13.9747	22.3995	19.6386	15.819	22.0869	18.9005	18.5012	24.4142	13.1922	18.8118	18.9903	23.3897	12.1032	29.9591	17.8579	21.9508		6.27531	2.51858	5.02702	7.24113	5.56659	3.42859	4.41978	7.69952
6.81124	4.36215	4.9794	5.07099	3.98782	3.77836	4.37649	3.76123	5.79019	4.61662	5.1144	3.39606	4.89219	3.71862	8.80037	4.32751	6.22266	5.20838	8.58095	3.25867		13.5542	24.8508	18.3358	19.3664	13.7529	22.3309	19.6568	15.7938	22.096	18.7573	18.5012	24.274	13.1912	18.7896	18.9096	23.2465	12.077	29.7705	17.6996	21.6392		6.277	2.54057	4.92214	7.29357	5.59535	3.41336	4.41978	7.85175
6.82438	4.36892	4.981	5.11281	4.00296	3.77597	4.38127	3.7915	5.73802	4.63653	5.05825	3.39168	4.85277	3.77716	8.79957	4.31556	6.25452	5.03476	8.59011	3.27819		13.5704	24.8236	18.3278	19.3855	13.6783	22.1666	19.6568	15.7857	22.104	18.598	18.4921	24.0824	13.1922	18.6646	18.956	23.1215	12.0367	29.5729	17.633	21.2429		6.28039	2.55579	4.80882	7.27327	5.61226	3.38123	4.41978	8.12746
6.83075	4.36654	4.99055	5.13391	4.00096	3.7684	4.3753	3.78871	5.71373	4.64251	5.01007	3.38411	4.82927	3.8126	8.79002	4.31676	6.27921	4.99215	8.61042	3.26982		13.4221	24.7368	18.3368	19.4158	13.641	22.0153	19.6548	15.82	22.101	18.3389	18.3903	23.9755	13.1822	18.475	18.9893	23.0267	11.9721	29.4055	17.631	20.8839		6.277	2.5541	4.79867	7.26312	5.62072	3.37953	4.42655	8.34227
6.82956	4.35897	5.0021	5.1371	3.99698	3.76442	4.3753	3.81659	5.70497	4.6441	5.00768	3.39646	4.8241	3.81858	8.78643	4.3291	6.30788	4.99812	8.64506	3.25469		13.2991	24.6037	18.3873	19.437	13.6339	21.9155	19.6568	15.8694	22.1111	17.988	18.36	23.9705	13.1559	18.2653	19.0114	22.9672	11.8774	29.2744	17.632	20.651		6.27193	2.5541	4.82404	7.27666	5.64609	3.45058	4.4367	8.4945
6.82478	4.35897	5.01843	5.19325	3.98185	3.76601	4.3745	3.85681	5.69302	4.6445	5.00967	3.4104	4.85476	3.8134	8.7932	4.34384	6.33934	4.95909	8.65303	3.23797		13.2971	24.5553	18.4387	19.4561	13.6339	21.8096	19.6598	15.9047	22.1202	17.5997	18.3883	23.9513	13.1146	18.0112	19.0719	22.8976	11.7553	29.1302	17.634	20.4846		6.28208	2.56256	4.83926	7.29864	5.6444	3.63156	4.44008	8.55878
6.83394	4.35578	5.04113	5.25577	3.98066	3.75725	4.37291	3.88269	5.68267	4.67396	4.98976	3.41	4.90573	3.81499	8.7932	4.34304	6.37638	4.93082	8.63511	3.21328		13.3153	24.5533	18.4609	19.4783	13.642	21.6906	19.6568	15.8553	22.1091	17.2226	18.3671	23.7829	13.1156	17.7833	19.1042	22.7494	11.6656	28.9286	17.6623	20.3747		6.28377	2.5744	4.85279	7.25974	5.62241	3.85822	4.44008	8.54525
6.85942	4.38485	5.0483	5.31033	4.02327	3.75407	4.3753	3.90897	5.70059	4.72215	4.97184	3.4104	4.92883	3.82933	8.79639	4.33547	6.40186	5.01285	8.59329	3.19615		13.3748	24.5483	18.479	19.4954	13.6611	21.6362	19.6558	15.7071	22.0204	16.8636	18.3459	23.5742	13.1247	17.6713	19.0225	22.5628	11.6585	28.6765	17.6713	20.283		6.27362	2.59301	4.86463	7.18024	5.59704	4.29969	4.4367	8.66365
6.87655	4.42746	5.04869	5.35772	4.11167	3.75327	4.37609	3.9253	5.72886	4.77073	4.9567	3.4104	4.93998	3.83929	8.8171	4.33627	6.41938	5.12914	8.55546	3.19336		13.3143	24.5322	18.4891	19.5459	13.5916	21.616	19.6477	15.5377	21.7904	16.5057	18.3318	23.4351	13.1388	17.6129	18.8703	22.3924	11.6636	28.4234	17.6512	20.0934		6.277	2.60654	4.87309	7.11935	5.60042	4.97796	4.42993	8.90215
6.87177	4.42348	5.03038	5.37524	4.26499	3.75486	4.36733	3.95477	5.72249	4.87029	4.93321	3.41916	4.94834	3.83092	8.84019	4.34742	6.43213	5.15582	8.53675	3.19058		13.1721	24.511	18.4881	19.6043	13.3475	21.5011	19.6396	15.3652	21.4769	16.176	18.3036	23.3312	13.1065	17.5231	18.6414	22.2694	11.6646	28.1632	17.634	19.7818		6.27362	2.61838	4.8714	7.13796	5.62748	5.37546	4.42316	9.10343
6.84628	4.38844	5.01206	5.42024	4.46211	3.75566	4.35897	3.94482	5.70019	4.97064	4.91171	3.42951	4.95989	3.82495	8.85493	4.3737	6.43969	5.15422	8.49214	3.19217		13.0481	24.4807	18.5042	19.6477	13.0944	21.2732	19.6285	15.1595	21.1401	15.8593	18.3147	23.306	13.0712	17.3507	18.479	22.2109	11.6626	27.9	17.6189	19.4783		6.27531	2.63022	4.85279	7.33078	5.64271	5.4465	4.42824	9.21676
6.75827	4.36972	5.04471	5.44931	4.65644	3.75407	4.3526	3.91415	5.61139	5.0037	4.90732	3.4315	4.98339	3.82097	8.86687	4.38605	6.44288	5.15422	8.44077	3.17823		12.9765	24.4343	18.4901	19.678	12.9512	21.0977	19.6154	15.0184	20.8497	15.4862	18.3368	23.3322	13.0652	17.1934	18.4911	22.1666	11.6626	27.6762	17.6018	19.2262		6.27193	2.62853	4.84434	7.52192	5.63594	5.4465	4.42655	9.28442
6.58584	4.36255	5.09369	5.46803	4.84202	3.75247	4.32353	3.91654	5.50904	5.0033	4.89219	3.43549	5.02719	3.81619	8.87165	4.39083	6.44567	5.11639	8.42405	3.16549		12.9482	24.3769	18.479	19.6759	12.9512	21.0443	19.6124	14.971	20.6308	15.1525	18.3459	23.3635	13.0632	17.1258	18.4921	22.0758	11.5859	27.4846	17.5977	18.9308		6.26685	2.64206	4.84772	7.53714	5.69176	5.45665	4.42993	9.35207
6.45841	4.35777	5.10962	5.48037	5.05467	3.75645	4.29525	3.90181	5.48316	5.03954	4.87905	3.42633	5.08294	3.80345	8.87205	4.38525	6.46598	5.09051	8.42524	3.16668		12.9785	24.3305	18.4669	19.678	12.9734	21.0433	19.6154	14.8923	20.4625	14.9821	18.3157	23.2848	13.0128	17.0976	18.476	21.9528	11.5375	27.2456	17.5977	18.6		6.2584	2.65221	4.85787	7.55575	5.71544	5.49217	4.42993	9.39436
6.38315	4.40078	5.12316	5.45687	5.24621	3.77119	4.29247	3.91813	5.52497	5.17652	4.86949	3.3869	5.11599	3.85283	8.88161	4.36853	6.51098	5.10126	8.38064	3.15673		12.9855	24.3174	18.4599	19.6901	12.9311	21.0453	19.5741	14.7814	20.3677	14.9044	18.1836	23.0781	12.9613	17.024	18.3973	21.8157	11.5416	26.9471	17.5977	18.3308		6.24656	2.66066	4.86633	7.58788	5.70698	5.51415	4.42993	9.38929
6.31425	4.44299	5.18489	5.39316	5.35612	3.78154	4.29366	3.9261	5.55643	5.31869	4.8683	3.36699	5.12316	3.93725	8.88639	4.33308	6.57987	5.11998	8.29821	3.15872		12.9875	24.3103	18.4609	19.7001	12.8746	21.0463	19.44	14.7259	20.3475	14.8147	18.1332	22.8381	12.9543	16.8838	18.3812	21.6483	11.5204	26.683	17.6008	18.1301		6.2381	2.70633	4.84941	7.64201	5.69345	5.51754	4.42824	9.43157
6.29036	4.43423	5.24303	5.33502	5.39157	3.78991	4.29724	3.92212	5.57077	5.35692	4.88343	3.36739	5.13431	3.9711	8.87524	4.31118	6.66827	5.10604	8.28347	3.16151		12.9875	24.2871	18.4669	19.7324	12.8686	21.0382	19.3149	14.6634	20.3556	14.6584	18.2048	22.5628	12.9149	16.7426	18.3852	21.492	11.469	26.4571	17.6008	17.9385		6.21273	2.75031	4.82742	7.7029	5.69176	5.51415	4.42824	9.53814
6.29593	4.43264	5.25816	5.31391	5.37444	3.81141	4.29724	3.90897	5.52975	5.35373	4.89856	3.36779	5.14905	3.9711	8.84696	4.31795	6.73836	5.10922	8.29582	3.1631		12.9573	24.2559	18.4417	19.7949	12.6225	20.9676	19.3039	14.5374	20.3535	14.4063	18.1725	22.2654	12.9149	16.6267	18.4135	21.3548	11.3671	26.1899	17.6038	17.748		6.20258	2.75031	4.79867	7.75534	5.69176	5.54968	4.43331	9.69544
6.29713	4.45335	5.27568	5.34736	5.34298	3.86318	4.2845	3.89703	5.48515	5.3625	4.92206	3.36022	5.16338	3.91813	8.82825	4.32711	6.78854	5.11958	8.29821	3.16828		12.8918	24.2327	18.3933	19.8494	12.2736	20.8214	19.2988	14.4365	20.29	14.0947	17.9305	21.9679	12.9149	16.4916	18.4639	21.1854	11.1655	25.9045	17.6038	17.5715		6.20596	2.74693	4.76653	7.8416	5.69683	5.65793	4.44177	9.84091
6.29474	4.48043	5.32227	5.39356	5.3167	3.89265	4.27415	3.90977	5.47997	5.36807	5.00688	3.33035	5.19166	3.83451	8.81112	4.32751	6.82756	5.12037	8.29861	3.19336		12.8212	24.1581	18.3711	19.8595	11.9953	20.6813	19.2998	14.37	20.2235	13.772	17.6976	21.6856	12.9059	16.2909	18.5113	20.9888	10.9507	25.6605	17.5846	17.3537		6.1975	2.74693	4.74623	7.92448	5.71713	5.73743	4.44346	9.92548
6.28837	4.5306	5.36767	5.42741	5.30435	3.89145	4.27375	3.94123	5.48077	5.37325	5.1148	3.35106	5.23626	3.80225	8.80236	4.32592	6.85425	5.11799	8.30259	3.21009		12.799	24.034	18.3661	19.8554	11.7009	20.5552	19.2736	14.2288	20.2235	13.4353	17.7056	21.4375	12.9039	16.0308	18.4619	20.7972	10.8892	25.4437	17.4616	17.0421		6.18059	2.74693	4.73778	7.91095	5.7425	5.78986	4.44177	9.98806
6.28717	4.63016	5.39475	5.47878	5.30037	3.88946	4.27255	3.95437	5.51342	5.3832	5.19006	3.37814	5.28245	3.79827	8.83263	4.33866	6.87894	5.11639	8.30378	3.21129		12.802	23.9745	18.3278	19.8534	11.4629	20.4473	19.2726	14.0685	20.2346	13.1176	17.9244	21.1723	12.9089	15.7353	18.2925	20.6369	10.8892	25.242	17.153	16.7376		6.17044	2.74693	4.73778	7.84499	5.75434	5.81354	4.44177	10.0574
6.27403	4.75242	5.39236	5.51462	5.29838	3.89105	4.27136	3.95557	5.58948	5.38639	5.23825	3.37814	5.29958	3.79867	8.8609	4.3518	6.91159	5.12675	8.29781	3.2308		12.7546	23.9564	18.3409	19.8685	11.3147	20.4019	19.2867	13.9788	20.2275	12.9291	18.1453	20.891	12.917	15.4247	18.1372	20.5048	10.8892	25.0777	16.7184	16.5097		6.1789	2.74524	4.73101	7.81454	5.75773	5.81523	4.43839	10.1166
6.29952	4.8452	5.36488	5.5413	5.30077	3.88827	4.27016	3.95517	5.65877	5.3848	5.24422	3.39367	5.30037	3.79787	8.87444	4.35379	6.93429	5.16259	8.29144	3.26664		12.7849	23.9483	18.4599	19.9099	11.232	20.3969	19.2928	13.9051	20.2255	12.8121	18.112	20.655	12.9391	15.1787	18.0374	20.3576	10.8872	24.9254	16.1941	16.2828		6.18228	2.74524	4.72255	7.84499	5.75603	5.87444	4.4367	10.1927
6.39987	4.88622	5.29997	5.59307	5.30674	3.87752	4.26101	3.95517	5.72488	5.3848	5.24422	3.39606	5.30037	3.79747	8.88679	4.35419	6.94026	5.1821	8.28865	3.29332		12.8081	23.9594	18.4044	19.9361	11.2209	20.3838	19.2534	13.767	20.2487	12.6911	17.512	20.3868	12.9543	15.0043	17.9325	20.1529	10.8579	24.7358	15.6284	16.0267		6.22457	2.7334	4.70902	7.89911	5.75773	6.03851	4.45023	10.2959
6.56115	4.90294	5.23068	5.65877	5.30993	3.8799	4.25145	3.95517	5.80572	5.38878	5.23586	3.39208	5.29798	3.80185	8.90072	4.35419	6.94345	5.1821	8.28268	3.29929		12.798	23.9655	18.3308	19.8595	11.2139	20.3092	19.1647	13.5321	20.2446	12.5862	16.5672	19.9119	12.8948	14.8248	17.8498	19.9018	10.8287	24.4888	15.3884	15.7696		6.24994	2.71817	4.70225	7.93294	5.75434	6.277	4.46376	10.3771
6.72562	4.95312	5.19285	5.68267	5.31869	3.86557	4.23671	3.97667	5.90647	5.38599	5.23228	3.38013	5.30396	3.82017	8.90431	4.36176	6.94305	5.1809	8.26476	3.33394		12.7869	23.9745	18.354	19.7143	11.1392	20.2497	19.1213	13.2205	20.2174	12.4834	15.7938	19.3865	12.6266	14.5545	17.8307	19.6285	10.8287	24.1873	15.3632	15.5185		6.25332	2.71817	4.70564	7.93294	5.75434	6.54256	4.46545	10.4481
6.79013	5.00051	5.21515	5.66116	5.34059	3.88508	4.23353	3.98862	6.05421	5.37126	5.22869	3.38252	5.34139	3.81221	8.89873	4.41074	6.94584	5.18887	8.23887	3.365		12.7839	23.9907	18.4699	19.6316	11.0505	20.2164	19.1224	12.8625	20.2305	12.3543	15.4187	19.0457	12.3493	14.1421	17.8307	19.4007	10.7752	23.8525	14.8117	15.2684		6.25501	2.72156	4.69887	7.93971	5.75942	6.77091	4.45361	10.5327
6.76504	5.0017	5.32148	5.62453	5.36568	3.96712	4.24428	3.99459	6.18563	5.35772	5.22909	3.40124	5.38838	3.80345	8.89435	4.53538	6.94424	5.22989	8.21657	3.36739		12.7929	23.9876	18.6565	19.6538	10.9466	20.1831	19.0951	12.4703	20.2416	12.198	15.216	18.7644	12.3493	13.644	17.8286	19.2786	10.7097	23.5248	14.1018	15.0234		6.2584	2.71987	4.70564	7.93971	5.75942	6.92991	4.46883	10.5885
6.74792	4.99533	5.44095	5.57993	5.37205	4.02924	4.23751	4.00136	6.22147	5.30874	5.22829	3.43788	5.4294	3.79906	8.89117	4.66759	6.92871	5.23865	8.20025	3.35863		12.8524	23.9776	18.7563	19.7112	10.5665	20.1478	18.9882	12.1093	20.2416	12.0165	15.0567	18.4226	12.3573	13.286	17.8105	19.2474	10.6663	23.191	13.6107	14.7814		6.28884	2.71987	4.70225	7.9414	5.75773	7.02801	4.51112	10.6156
6.78018	5.00091	5.51183	5.59546	5.37126	4.04517	4.23472	4.00296	6.22505	5.28484	5.23267	3.4558	5.47878	3.79827	8.88201	4.73091	6.92194	5.23944	8.21179	3.34867		12.9654	23.9715	18.7815	19.7072	10.1642	20.1186	18.8067	11.9076	20.2477	11.8179	14.9942	18.0918	12.3805	13.1227	17.754	19.317	10.6683	22.7978	13.2104	14.608		6.26516	2.71817	4.68365	7.92618	5.76449	7.09398	4.51281	10.6477
6.86659	5.01086	5.53134	5.62851	5.36767	4.05632	4.26658	4.00057	6.22505	5.29719	5.27051	3.46097	5.54687	3.79827	8.88798	4.76834	6.92194	5.23307	8.22334	3.33235		13.0924	23.9685	18.7835	19.6538	10.1652	20.1196	18.6464	11.8411	20.2265	11.6202	14.9922	17.7823	12.3472	12.9946	17.6572	19.4077	10.7379	22.3491	12.8867	14.5172		6.21611	2.73001	4.68534	7.88558	5.77126	7.1295	4.57201	10.6917
6.93588	5.01086	5.53174	5.62174	5.36767	4.08778	4.26499	3.98623	6.21828	5.30197	5.28922	3.47889	5.59586	3.79867	8.91466	4.82848	6.91717	5.22471	8.22056	3.33513		13.283	23.9655	18.8188	19.6064	9.99073	20.1115	18.5607	11.8037	20.1418	11.4186	14.9841	17.4737	12.3886	12.8655	17.5503	19.3996	10.7178	21.9165	12.6528	14.4426		6.18566	2.75031	4.68872	7.83315	5.75603	7.14134	4.753	10.7306
6.95938	5.01086	5.53612	5.62293	5.36767	4.14672	4.22994	3.97827	6.22943	5.30316	5.28803	3.48009	5.61099	3.79946	8.93218	4.84441	6.89646	5.2259	8.21259	3.33394		13.5472	23.9665	18.9439	19.5882	9.75075	20.1065	18.5103	11.7543	19.9825	11.2169	14.9397	17.1793	12.4017	12.8121	17.4515	19.2837	10.6825	21.5474	12.4572	14.3408		6.13323	2.752	4.68703	7.78409	5.74081	7.13288	4.91538	10.7441
6.96615	5.02799	5.53055	5.61139	5.36528	4.24946	4.18295	3.97707	6.26447	5.31232	5.28922	3.49402	5.61537	3.80424	8.93019	4.8464	6.88929	5.22551	8.20781	3.3419		13.7569	23.9695	19.0296	19.6013	9.57025	20.1065	18.5032	11.6838	19.7788	11.0132	14.851	16.8233	12.4047	12.7839	17.3577	19.0931	10.6976	21.2217	12.3503	14.2107		6.01483	2.752	4.69211	7.76041	5.74758	7.11597	4.94413	10.7374
6.96057	5.05706	5.53254	5.56519	5.36011	4.38366	4.13716	3.9715	6.31624	5.31192	5.28524	3.49203	5.62572	3.80305	8.93059	4.86471	6.88809	5.22232	8.20224	3.3427		13.9162	23.9735	19.0477	19.6326	9.50269	20.0571	18.5395	11.5799	19.6618	10.8267	14.7643	16.3696	12.4198	12.7072	17.3204	18.8501	10.6784	20.9293	12.3251	14.0796		5.95393	2.74862	4.71579	7.73335	5.74419	7.10243	4.92384	10.7323
6.95659	5.06502	5.56838	5.51103	5.35931	4.41512	4.08977	3.97468	6.38753	5.31391	5.2717	3.49323	5.59944	3.80743	8.93338	4.87706	6.88571	5.23267	8.20224	3.30805		14.0806	23.9776	19.0467	19.6719	9.50471	19.9916	18.5506	11.4488	19.6386	10.6905	14.6997	16.0973	12.4239	12.5308	17.3275	18.6222	10.6774	20.7347	12.32	14.006		5.96916	2.75031	4.73439	7.67415	5.74758	7.09398	4.92045	10.7306
6.96615	5.06343	5.64165	5.47479	5.3609	4.40954	4.06826	3.97866	6.47832	5.32825	5.25975	3.48925	5.53453	3.80663	8.92103	4.9133	6.88451	5.24701	8.20303	3.27819		14.2167	23.9826	19.1062	19.684	9.49563	19.9462	18.5305	11.3097	19.6366	10.5433	14.6775	16.0176	12.4219	12.2938	17.3184	18.482	10.7278	20.5522	12.32	13.9667		5.96916	2.75031	4.73778	7.57266	5.74758	7.08552	4.9103	10.7272
6.96216	5.05387	5.70457	5.47679	5.35931	4.45255	4.05632	3.97747	6.58544	5.3398	5.25936	3.48805	5.48395	3.80822	8.89316	5.00768	6.88491	5.25059	8.20423	3.26743		14.2409	24.0078	19.1355	19.688	9.49261	19.9159	18.4357	11.1312	19.6366	10.3124	14.6775	15.9319	12.4219	11.9812	17.3305	18.3903	10.6996	20.291	12.2797	13.8981		5.97761	2.75031	4.74116	7.505	5.73066	7.06861	4.90016	10.734
6.93747	5.0471	5.73882	5.4951	5.35851	4.46529	4.04278	3.98464	6.67823	5.35214	5.27449	3.47889	5.51422	3.8134	8.87962	5.10644	6.88371	5.25059	8.20582	3.26704		14.2389	24.0371	19.0528	19.7385	9.45832	19.8615	18.2653	10.9103	19.6275	10.1339	14.6725	15.7716	12.436	11.6777	17.3386	18.2824	10.6502	20.0178	12.2071	13.7942		5.97423	2.75031	4.74454	7.47794	5.69007	7.06861	4.90523	10.7425
6.90801	5.04949	5.73723	5.50426	5.36289	4.46768	4.03481	3.98344	6.74633	5.38201	5.29241	3.48805	5.67869	3.76721	8.8836	5.14626	6.88053	5.24701	8.20502	3.27182		14.2137	24.0431	18.9489	19.8211	9.39278	19.8131	18.1332	10.7772	19.6205	10.1158	14.6876	15.6304	12.4662	11.5718	17.3345	18.1412	10.6512	19.8191	12.1708	13.7146		5.93195	2.74693	4.7141	7.4458	5.66469	7.0889	4.90861	10.7357
6.89686	5.05347	5.72289	5.48117	5.36847	4.46012	4.03282	3.98862	6.81602	5.42303	5.30276	3.49841	5.85311	3.72579	8.88679	5.1586	6.87057	5.26015	8.20303	3.27381		14.1441	24.0431	18.9429	19.924	9.43412	19.8161	18.1029	10.7218	19.6205	10.1339	14.5999	15.4983	12.4814	11.5769	17.3386	17.989	10.6381	19.6175	12.1516	13.6581		5.80001	2.71817	4.6532	7.41535	5.65962	7.09398	4.9103	10.7374
6.90363	5.06423	5.75076	5.46285	5.36608	4.39242	4.03123	4.00813	6.90004	5.43139	5.30276	3.51115	5.96541	3.72818	8.87603	5.17652	6.865	5.28205	8.20901	3.28217		14.129	24.033	18.9267	19.9895	9.38169	19.8181	18.0999	10.626	19.6185	10.1228	14.4638	15.332	12.4108	11.5335	17.3356	17.8488	10.6492	19.3361	12.1284	13.5895		5.69007	2.70295	4.60077	7.40521	5.65455	7.09736	4.90016	10.783
6.91517	5.0917	5.79855	5.45966	5.36528	4.34065	4.01411	4.02526	6.98407	5.43099	5.29559	3.51473	6.03749	3.7453	8.85771	5.2036	6.865	5.28006	8.21299	3.30089		14.131	24.0129	18.9126	20.0097	9.27077	19.8232	18.0918	10.5282	19.6114	10.1006	14.4567	15.1101	12.3372	11.3923	17.268	17.7117	10.6482	19.0639	12.079	13.5149		5.68499	2.70972	4.56694	7.39337	5.66469	7.11766	4.9103	10.8321
6.92792	5.11679	5.80891	5.49072	5.36528	4.35419	4.02207	4.0153	7.05575	5.41785	5.30635	3.51991	6.09841	3.74132	8.839	5.22352	6.87057	5.27608	8.2098	3.31801		14.1663	23.9987	18.9136	20.0147	9.06103	19.8302	18.1049	10.503	19.5479	10.0966	14.4809	14.7824	12.3049	11.228	17.147	17.5554	10.5937	18.8642	11.9974	13.4363		5.68499	2.72832	4.54495	7.38491	5.67823	7.13288	4.92553	10.8592
6.89805	5.12117	5.79815	5.5417	5.36608	4.37609	4.03322	4.00694	7.09876	5.39236	5.34099	3.5219	6.14819	3.73575	8.81789	5.2279	6.88093	5.26573	8.2094	3.31363		14.1663	23.9846	18.8632	20.0158	8.58509	19.8302	18.1473	10.4798	19.5015	10.0926	14.486	14.4587	12.2736	11.1413	17.0936	17.3759	10.502	18.6988	11.9449	13.3475		5.67992	2.76046	4.54833	7.38829	5.64778	7.13796	4.912	10.8828
6.84588	5.12197	5.76669	5.58431	5.36568	4.39123	4.04198	4.01092	7.1107	5.38599	5.3844	3.53186	6.19718	3.73694	8.80117	5.2267	6.88371	5.24701	8.21259	3.31881		14.2732	23.9493	18.9731	20.0218	7.92664	19.7778	18.2118	10.4152	19.4965	10.1319	14.5051	14.2399	12.2867	11.0969	17.0744	17.1863	10.4142	18.5063	11.8965	13.28		5.69007	2.76215	4.5754	7.37307	5.63425	7.14303	4.90016	10.893
6.80009	5.13909	5.70338	5.64046	5.36767	4.37331	4.06747	4.01092	7.10393	5.38679	5.42024	3.52986	6.23461	3.74451	8.7944	5.22909	6.88332	5.23745	8.20662	3.32797		14.5737	23.8949	19.1002	20.0662	7.50011	19.7032	18.2854	10.3457	19.4894	10.2479	14.5404	14.0191	12.323	11.1019	17.0714	17.0078	10.3588	18.2874	11.7775	13.2336		5.69007	2.76384	4.59569	7.3477	5.69345	7.14134	4.94413	10.893
6.70332	5.1606	5.66156	5.69023	5.36727	4.34105	4.11167	4.0149	7.09079	5.39555	5.43099	3.53544	6.24456	3.7457	8.79878	5.2279	6.88411	5.20241	8.20343	3.34708		14.972	23.8283	19.0397	20.162	7.36701	19.6729	18.3288	10.263	19.4783	10.2842	14.5545	13.7176	12.313	11.1433	17.0542	16.8616	10.3437	18.0827	11.712	13.1378		5.67484	2.75877	4.60753	7.32571	5.73404	7.13626	5.01856	10.8913
6.56792	5.19723	5.64125	5.70537	5.36688	4.33746	4.12402	4.01172	7.08761	5.42581	5.41108	3.54659	6.24456	3.74053	8.81789	5.22431	6.88451	5.10564	8.22334	3.40442		15.3794	23.7305	19.076	20.2598	7.33877	19.6648	18.3288	10.148	19.441	10.2892	14.5636	13.4232	12.3069	11.1463	16.9998	16.7295	10.3527	17.9285	11.708	13.0289		5.6833	2.7926	4.62445	7.27666	5.70698	7.13796	5.06254	10.8896
6.47832	5.26573	5.63886	5.70377	5.36011	4.34065	4.12441	4.03521	7.10154	5.45687	5.38559	3.54579	6.24417	3.75446	8.82267	5.21714	6.8865	5.07577	8.29861	3.58363		15.6304	23.5944	19.1839	20.3535	7.33776	19.6699	18.1876	10.028	19.2877	10.3547	14.4981	13.2205	12.3301	11.0697	16.9725	16.5581	10.3598	17.8276	11.6959	12.9533		5.69007	2.81459	4.65489	7.17348	5.67315	7.13626	5.11835	10.8981
6.4154	5.32825	5.64165	5.70338	5.33741	4.34543	4.12561	4.03163	7.11389	5.45887	5.38161	3.53743	6.24377	3.80583	8.82665	5.22551	6.88053	5.10962	8.4117	3.79269		15.6456	23.4452	19.1899	20.4796	7.31961	19.6901	17.988	9.90805	18.9852	10.4858	14.4113	13.1277	12.3573	10.9779	16.9241	16.3696	10.3295	17.7581	11.6888	12.8867		5.66639	2.82474	4.68703	7.0297	5.66639	7.13626	5.15387	10.9437
6.38076	5.34975	5.63966	5.71254	5.32944	4.28729	4.1268	4.07543	7.11588	5.46404	5.39077	3.53425	6.25532	3.84406	8.84696	5.23387	6.86261	5.11161	8.51644	3.91774		15.6355	23.2909	19.3119	20.5582	7.2823	19.7072	17.8508	9.79411	18.6625	10.5937	14.4154	13.0753	12.3432	10.9366	16.8142	16.2385	10.2448	17.628	11.6727	12.8343		5.63594	2.84842	4.71071	6.96712	5.7628	7.13288	5.16064	11.0418
6.38076	5.35612	5.62293	5.7201	5.33143	4.19968	4.13437	4.08818	7.11588	5.49351	5.4067	3.53743	6.26766	3.86238	8.86648	5.22312	6.84628	5.12754	8.58573	4.00296		15.7464	23.1447	19.6759	20.534	7.26214	19.7112	17.6754	9.70335	18.5002	10.7218	14.5132	12.9573	12.2797	10.9366	16.7134	16.1598	10.1006	17.3345	11.6737	12.8494		5.52769	2.85857	4.73101	6.97727	5.81016	7.13288	5.17586	11.1163
6.372	5.35971	5.61935	5.72209	5.33502	4.15149	4.16543	4.10172	7.11429	5.50904	5.4075	3.54659	6.27841	3.86676	8.86448	5.23785	6.82796	5.1586	8.60405	4.04357		15.6567	23.0186	20.0702	20.4715	7.27625	19.7122	17.4787	9.62874	18.5022	11.0283	14.6987	12.7385	12.2051	10.9426	16.6388	16.1205	10.021	16.9715	11.6696	12.9553		5.30441	2.85857	4.77499	6.98572	5.76111	7.12104	5.18939	11.1653
6.36642	5.3605	5.62293	5.7197	5.33502	4.14672	4.21919	4.16862	7.10871	5.51342	5.40829	3.55177	6.29753	3.85721	8.85851	5.31272	6.81801	5.16099	8.60285	4.04158		15.5387	22.947	20.3455	20.4322	7.27625	19.7092	17.4424	9.57328	18.3086	11.5617	14.9155	12.5772	12.1637	10.9557	16.6075	16.1134	10.024	16.6872	11.5446	13.1126		5.24183	2.86026	4.82235	6.98572	5.75265	7.11766	5.17586	11.2093
6.36204	5.3625	5.61218	5.6974	5.3382	4.16145	4.25782	4.18295	7.1115	5.51263	5.40112	3.5446	6.32182	3.90619	8.85134	5.37006	6.78655	5.15781	8.60285	4.14194		15.6193	22.9611	20.4645	20.4655	7.246	19.6931	17.4475	9.53395	18.0666	12.0518	15.0627	12.4713	12.1486	10.9799	16.6247	16.0842	10.024	16.4573	11.2693	13.2285		5.25367	2.85687	4.83588	6.98742	5.7628	7.11089	5.17756	11.2279
6.33974	5.36887	5.59347	5.67311	5.3402	4.16025	4.27136	4.18654	7.12743	5.5186	5.38002	3.54301	6.33655	3.98543	8.84218	5.37763	6.72721	5.14228	8.5929	4.27295		15.6809	22.9904	20.4574	20.5482	7.23189	19.678	17.4656	9.48051	17.878	12.3906	15.1	12.3049	12.1446	10.9688	16.661	15.9703	9.97258	16.3282	11.1352	13.2961		5.24521	2.85687	4.82742	7.06184	5.74758	7.09567	5.17079	11.2364
6.25372	5.38081	5.58829	5.67112	5.3398	4.16185	4.27773	4.20446	7.14256	5.53732	5.35851	3.54619	6.34054	4.06787	8.8382	5.38161	6.6858	5.12077	8.59051	4.40755		15.704	22.9369	20.4433	20.5996	7.23592	19.6699	17.4021	9.4069	17.5181	12.6397	15.095	12.0579	12.1526	10.9345	16.6973	15.7898	9.84553	16.301	11.1483	13.3153		5.1877	2.85687	4.80374	7.1498	5.67315	7.0889	5.21138	11.2702
6.14899	5.40152	5.58749	5.68068	5.34856	4.14871	4.26578	4.21999	7.15331	5.55922	5.41267	3.5677	6.33934	4.14273	8.83541	5.39714	6.66071	5.10604	8.57298	4.52383		15.7242	22.7746	20.4322	20.5774	7.22987	19.6618	17.0159	9.35446	16.9282	12.8161	15.0627	11.8572	12.1456	10.9174	16.666	15.582	9.77696	16.2738	11.111	13.3011		5.07438	2.85687	4.79359	7.26143	5.54629	7.08721	5.28412	11.3142
6.05979	5.41546	5.58391	5.6747	5.36568	4.12282	4.2391	4.23751	7.16685	5.59426	5.52099	3.5884	6.35646	4.15548	8.83183	5.41227	6.62407	5.09688	8.57736	4.55928		15.7434	22.5971	20.3596	20.53	7.2339	19.686	16.4734	9.32018	16.423	12.9472	15.0799	11.7523	12.1325	10.8912	16.5884	15.3975	9.72755	16.1558	11.0757	13.3606		4.9509	2.86871	4.79021	7.37983	5.45495	7.08383	5.29257	11.3784
6.02275	5.42581	5.57873	5.67192	5.37205	4.13477	4.22835	4.24149	7.18676	5.64842	5.59586	3.6119	6.38633	4.15866	8.83302	5.41506	6.56155	5.0913	8.61838	4.55928		15.7353	22.4186	20.283	20.5461	7.23491	19.7314	16.1235	9.24758	16.1386	13.0975	15.0063	11.7069	12.1496	10.869	16.5359	15.2856	9.65697	15.9894	11.0556	13.6621		4.79359	2.88901	4.79021	7.40351	5.40759	7.08383	5.29088	11.4647
6.08488	5.45449	5.58072	5.68745	5.37245	4.15866	4.23353	4.22317	7.19951	5.71293	5.61457	3.64296	6.41222	4.2172	8.8398	5.41227	6.49943	5.10843	8.69763	4.56167		15.7464	22.219	20.2799	20.5855	7.21777	19.7485	15.9783	9.1296	16.0217	13.2638	14.9397	11.6737	12.1617	10.8589	16.4956	15.1898	9.63579	15.8573	11.0243	13.9798		4.72086	2.88901	4.79698	7.35954	5.35516	7.07537	5.2672	11.5222
6.18324	5.47679	5.57515	5.68904	5.37285	4.20127	4.23393	4.20844	7.21026	5.72169	5.6082	3.66805	6.43093	4.33746	8.84418	5.41267	6.46239	5.13431	8.8394	4.5545		15.7988	21.9841	20.2678	20.6077	7.16332	19.7556	15.9128	9.08322	15.935	13.3818	14.9619	11.6041	12.1617	10.8398	16.5006	15.0859	9.64285	15.7202	10.9819	14.1451		4.73101	2.88732	4.80205	7.29864	5.30103	7.05169	5.25536	11.529
6.24178	5.48117	5.57276	5.66037	5.37205	4.26738	4.23791	4.26578	7.21782	5.71293	5.60263	3.67721	6.4393	4.35937	8.84736	5.41426	6.44009	5.14387	8.99032	4.53857		15.8311	21.735	20.2336	20.6349	7.13509	19.7586	15.8734	9.09834	15.8129	13.4463	14.9639	11.5093	12.1436	10.8055	16.4926	15.0153	9.64285	15.5478	10.9406	14.2278		4.73101	2.88394	4.7919	7.19547	5.35178	7.01955	5.24014	11.5222
6.28518	5.48714	5.57555	5.71413	5.37245	4.31397	4.23671	4.4418	7.2226	5.82444	5.60621	3.66805	6.44447	4.36415	8.85015	5.41546	6.42138	5.12356	9.0405	4.5326		15.8341	21.5555	20.1489	20.6671	7.13408	19.7606	15.8513	9.21733	15.7182	13.4927	14.9609	11.3984	12.0599	10.8297	16.4774	14.9962	9.62773	15.4015	10.9224	14.2601		4.71579	2.87548	4.7733	7.11766	5.38899	7.0094	5.23168	11.5357
6.31027	5.48833	5.6078	5.84992	5.37404	4.36335	4.23552	4.50352	7.22539	5.92598	5.6094	3.66168	6.43571	4.38007	8.85294	5.4278	6.3923	5.05785	9.02855	4.51627		15.8271	21.4648	20.0258	20.6682	7.13408	19.7869	15.8422	9.62067	15.6819	13.5331	14.9619	11.2653	11.9711	10.9255	16.4744	14.979	9.62067	15.3088	10.8932	14.2601		4.68872	2.8721	4.75469	7.13965	5.37884	7.0111	5.2283	11.5865
6.29514	5.49351	5.67152	5.9005	5.37842	4.42707	4.23552	4.50472	7.22579	5.93474	5.61457	3.65451	6.41938	4.38485	8.85055	5.47081	6.34412	4.98378	9.02139	4.47206		15.8119	21.3911	19.9401	20.6399	7.10988	19.8453	15.8412	10.2983	15.7081	13.5724	14.9589	11.1645	11.9268	11.0646	16.4653	14.9195	9.62067	15.218	10.7883	14.255		4.66673	2.88732	4.74454	7.16671	5.37376	7.00771	5.23337	11.7066
6.24496	5.49351	5.70935	5.90806	5.40112	4.46171	4.2395	4.50671	7.21862	5.87581	5.61816	3.63699	6.42775	4.38366	8.83741	5.4967	6.30868	4.92923	9.01979	4.43941		15.7091	21.3074	19.8695	20.5714	7.00299	19.8968	15.8392	11.3137	15.7605	13.5936	14.9397	11.113	11.9137	11.2723	16.4764	14.8318	9.54403	15.1283	10.5968	14.248		4.65659	2.88901	4.75469	7.24959	5.367	7.00602	5.23506	11.9958
6.19996	5.50506	5.70975	6.02713	5.4509	4.46171	4.25224	4.51985	7.20508	5.82922	5.61935	3.62823	6.44885	4.39361	8.82984	5.44652	6.27682	4.89976	9.04727	4.42667		15.5024	21.2197	19.8504	20.4393	6.94955	19.9885	15.8109	12.6044	15.7746	13.5946	14.9155	11.0515	11.9207	11.6233	16.4956	14.7461	9.46437	15.0819	10.4374	14.2581		4.67688	2.88225	4.78006	7.4458	5.35854	7.00602	5.23506	12.2614
6.25412	5.51103	5.73444	6.17408	5.50546	4.4872	4.24826	4.52304	7.19871	5.82245	5.61338	3.61827	6.47753	4.39441	8.84019	5.4071	6.237	4.90573	9.15598	4.41512		15.3925	21.0735	19.8332	20.3021	7.01408	20.1257	15.7313	13.6904	15.7575	13.5875	14.9014	10.9497	11.9187	12.1052	16.5087	14.6503	9.32724	15.0718	10.3689	14.2732		4.6143	2.88394	4.81051	7.66569	5.35685	6.99249	5.23676	12.28
6.51177	5.51741	5.76789	6.28359	5.55245	4.52543	4.24547	4.52861	7.19911	5.82563	5.55205	3.62464	6.51217	4.39162	8.84019	5.41068	6.17806	4.89578	9.23483	4.41233		15.3662	20.8587	19.6396	20.3082	7.04433	20.2174	15.6183	14.5253	15.6899	13.5976	14.9014	10.8811	11.9429	12.4289	16.538	14.5747	9.09229	15.0587	10.3568	14.2581		4.53311	2.911	4.8325	7.83315	5.35685	6.96712	5.24183	12.2546
6.82717	5.5417	5.7866	6.32978	5.6086	4.52702	4.25463	4.54494	7.19911	5.82364	5.49311	3.64137	6.55637	4.39839	8.83342	5.41546	6.15536	4.88025	9.23324	4.40915		15.4167	20.6369	19.4995	20.3677	7.01308	20.2688	15.4136	15.1575	15.5135	13.5976	14.9125	10.865	11.9903	12.5439	16.5874	14.5223	8.95415	15.0335	10.38	14.252		4.49928	2.91607	4.83757	7.93294	5.32471	6.96712	5.25705	12.2901
7.04619	5.5628	5.8097	6.32461	5.65798	4.52264	4.25623	4.54733	7.1999	5.81408	5.50426	3.64416	6.58943	4.42746	8.81829	5.42502	6.15536	4.91688	9.21174	4.41671		15.454	20.4342	19.4652	20.284	6.96367	20.3132	15.0395	15.2987	15.1575	13.5805	14.9165	10.8882	11.9822	12.554	16.6206	14.4708	8.90777	14.9982	10.4213	14.3387		4.4756	2.911	4.83588	8.06657	5.20293	6.9705	5.25198	12.3663
7.20787	5.58351	5.82483	6.32341	5.67908	4.52423	4.25543	4.55012	7.19791	5.78262	5.56798	3.63858	6.5962	4.42547	8.78962	5.42581	6.17408	4.92166	9.20975	4.44499		15.3955	20.2436	19.4652	20.0652	6.91123	20.3556	14.6211	15.3552	14.488	13.5583	14.9226	10.988	11.9227	12.5267	16.5803	14.4476	8.88256	14.9498	10.4566	14.4164		4.47222	2.92115	4.8511	8.30337	5.10482	6.97727	5.24183	12.4255
7.31897	5.609	5.81607	6.32023	5.69103	4.5314	4.24667	4.56326	7.19234	5.73125	5.70855	3.63739	6.59659	4.43503	8.77289	5.429	6.22625	4.91489	9.23483	4.46569		15.3279	20.046	19.4813	19.8665	6.89913	20.4302	14.1764	15.7535	13.7831	13.5432	14.9306	11.1826	11.8441	12.5933	16.5823	14.4184	8.88256	14.9024	10.4868	14.4376		4.46545	2.93299	4.86802	8.4556	5.07438	6.98234	5.23337	12.4559
7.33132	5.61338	5.81169	6.31425	5.70457	4.53299	4.22716	4.56405	7.19552	5.71015	5.96501	3.63699	6.59859	4.48122	8.7713	5.43895	6.31266	4.90892	9.25116	4.47366		15.3057	19.8111	19.4813	19.7657	6.91829	20.523	13.522	16.427	13.5371	13.5391	14.9135	11.5234	11.8189	12.8978	16.6156	14.371	8.80794	14.8772	10.506	14.4547		4.44684	2.92622	4.86971	8.4556	5.0507	6.98065	5.22661	12.4559
7.30862	5.61537	5.8101	6.30589	5.71612	4.5318	4.20366	4.55012	7.21424	5.70815	6.20156	3.64416	6.62965	4.52543	8.7709	5.43975	6.39589	4.91688	9.26948	4.47684		15.3128	19.5388	19.4753	19.7556	6.9435	20.6087	12.7677	17.2055	13.5381	13.5593	14.8843	12.1113	11.838	13.2175	16.6287	14.3216	8.62845	14.8651	10.511	14.4618		4.4367	2.91946	4.86802	8.55709	5.07607	6.97896	5.22322	12.483
7.30464	5.64683	5.8101	6.28837	5.7209	4.52981	4.18654	4.54295	7.27597	5.69501	6.28518	3.64854	6.68341	4.56206	8.76214	5.46046	6.42974	4.92923	9.24081	4.47804		15.333	19.2746	19.448	19.801	6.93644	20.6974	12.3593	17.7954	13.402	13.5936	14.851	12.6871	11.8562	13.4736	16.5601	14.2722	8.37132	14.8601	10.507	14.4587		4.41471	2.91946	4.90692	8.74822	5.10482	6.97896	5.21646	12.5591
7.30822	5.70776	5.79855	6.26248	5.72369	4.52901	4.16941	4.54136	7.36318	5.67988	6.26049	3.6573	6.71765	4.5764	8.74581	5.45011	6.45841	4.92724	9.1747	4.4868		15.331	19.078	19.445	19.8625	6.91829	20.7518	12.3039	18.1775	13.1459	13.5986	14.8207	12.8827	11.8572	13.6873	16.4623	14.2107	8.10209	14.8631	10.4939	14.4517		4.37242	2.92115	4.96443	8.94951	5.1082	6.97896	5.2283	12.642
7.30862	5.742	5.79099	6.22903	5.72408	4.52941	4.1499	4.58357	7.41893	5.69063	6.25571	3.68079	6.73916	4.5752	8.73944	5.40431	6.51257	4.93839	9.0843	4.48879		15.3128	18.9792	19.444	19.9129	6.90115	20.7559	12.2948	18.4286	12.9936	13.5966	14.7663	12.8827	11.834	13.7902	16.3726	14.132	7.95689	14.8641	10.4889	14.4255		4.37749	2.91607	4.96951	9.06791	5.11328	6.97896	5.25705	12.6589
7.30862	5.75156	5.79656	6.21828	5.72289	4.53658	4.14592	4.62339	7.4695	5.71771	6.27483	3.69752	6.74553	4.56167	8.75617	5.32466	6.54164	4.93998	8.89555	4.49118		15.3088	18.843	19.4551	19.9552	6.87997	20.7337	12.2273	18.5436	12.8706	13.5946	14.61	12.922	11.8189	13.8194	16.18	14.0574	7.91152	14.8641	10.4798	14.4053		4.40287	2.90593	4.92384	9.09666	5.1082	6.98065	5.27735	12.6623
7.30464	5.75116	5.79815	6.22465	5.72289	4.55569	4.14632	4.61981	7.53441	5.72289	6.32421	3.69632	6.74035	4.55052	8.80555	5.29639	6.54283	4.936	8.65382	4.48919		15.3088	18.6061	19.4682	19.9512	6.86384	20.767	12.2152	18.5809	12.5308	13.5845	14.494	13.0188	11.8068	13.8416	15.8926	13.9909	7.90547	14.8641	10.4626	14.3992		4.40625	2.90254	4.92214	9.13726	5.07607	6.98234	5.27059	12.6656
7.313	5.74877	5.79815	6.23978	5.73125	4.56485	4.14273	4.62578	7.57185	5.70298	6.39908	3.70548	6.72881	4.56246	8.87643	5.294	6.54642	4.936	8.524	4.48521		15.3068	18.4276	19.4591	19.9139	6.85275	20.8497	12.2041	18.593	12.0427	13.5754	14.5334	13.1549	11.7543	13.8578	15.7151	13.9172	7.92261	14.8641	10.4636	14.368		4.38257	2.90593	4.95428	9.17616	5.06084	6.98403	5.23506	12.7959
7.36437	5.73165	5.79935	6.24417	5.76868	4.56167	4.14353	4.68989	7.57105	5.67072	6.43014	3.72619	6.74513	4.56883	8.93059	5.32546	6.57031	4.97622	8.52639	4.48521		15.3088	18.3479	19.4541	19.8675	6.94854	20.9424	12.197	18.596	11.8128	13.5815	14.5434	13.3576	11.6283	13.8467	15.6879	13.8336	7.93067	14.8651	10.4596	14.3216		4.36396	2.90762	4.93906	9.20154	5.05915	6.98234	5.22322	12.943
7.38946	5.70577	5.79975	6.21151	5.79178	4.56405	4.1507	4.72892	7.56707	5.64922	6.42456	3.71106	6.76504	4.60228	8.95329	5.39913	6.58465	5.17812	8.64546	4.48521		15.3088	18.2642	19.442	19.7657	7.12399	21.0362	12.194	18.599	11.7886	13.5815	14.5495	13.5976	11.4407	13.7821	15.6788	13.768	7.93168	14.8651	10.4667	14.3034		4.37749	2.90593	4.9306	9.28442	5.06254	6.96881	5.23337	12.9803
7.39105	5.67829	5.79218	6.19001	5.80413	4.56445	4.1499	4.73051	7.60012	5.65041	6.42257	3.67442	6.76345	4.66281	8.93139	5.46643	6.60018	5.3394	8.75218	4.48521		15.3441	18.1432	19.3149	19.6074	7.22685	21.1048	12.1637	18.6031	11.8199	13.5815	14.5505	13.7731	11.1755	13.7448	15.6163	13.7337	7.90849	14.8661	10.4616	14.3045		4.42147	2.90762	4.99488	9.44172	5.06592	6.96204	5.25705	12.9752
7.38787	5.66634	5.77147	6.1904	5.8332	4.56366	4.14552	4.74405	7.65906	5.64643	6.41819	3.67044	6.73916	4.69228	8.84537	5.49988	6.63881	5.35453	8.7494	4.48043		15.4217	18.0101	19.1849	19.4591	7.2087	21.1441	12.1647	18.602	11.8763	13.5795	14.5455	13.8941	10.9527	13.7307	15.5609	13.6964	7.83791	14.8621	10.4647	14.3236		4.46714	2.90593	5.0693	9.46202	5.06423	6.97219	5.26382	13.0022
7.38269	5.61855	5.75037	6.18642	5.86107	4.56963	4.14114	4.74764	7.70326	5.62891	6.38076	3.67123	6.70491	4.68551	8.71196	5.48395	6.66947	5.33303	8.73148	4.46609		15.458	17.8397	19.1818	19.2968	7.15626	21.137	12.1325	18.601	11.9863	13.5623	14.5465	13.9848	10.8287	13.7267	15.5034	13.6571	7.76127	14.851	10.4647	14.3559		4.51112	2.90931	5.0896	9.47555	5.06423	6.98065	5.25536	13.053
7.37751	5.55205	5.73205	6.18802	5.86506	4.60149	4.14034	4.74963	7.74826	5.61218	6.34691	3.67323	6.68699	4.68432	8.55666	5.47161	6.67704	5.31829	8.76015	4.45733		15.4681	17.6108	19.1687	19.0528	7.14618	21.1098	12.1194	18.6	12.0216	13.5311	14.489	14.0302	10.6976	13.7236	15.4126	13.6339	7.70783	14.851	10.4647	14.3609		4.5348	2.90931	5.12343	9.49585	5.10651	6.98234	5.24014	13.0428
7.37791	5.50466	5.71771	6.18722	5.86426	4.64808	4.14233	4.76396	7.82791	5.61218	6.34054	3.68238	6.68659	4.66122	8.34361	5.49271	6.67982	5.32745	8.78723	4.45574		15.4741	17.3648	19.0306	18.834	7.13609	21.0866	12.0972	18.592	12.0034	13.5028	14.372	14.0514	10.503	13.7216	15.3733	13.6218	7.67959	14.857	10.4364	14.3508		4.52634	2.90931	5.13865	9.50431	5.10651	7.00433	5.22492	13.0665
7.39384	5.47918	5.68625	6.19598	5.86784	4.6652	4.14273	4.7775	7.87808	5.5863	6.34611	3.73814	6.68819	4.62538	8.15326	5.47002	6.67425	5.32267	8.79041	4.45056		15.4671	17.1299	18.7936	18.7059	7.08366	21.0554	12.0014	18.5557	12.0044	13.4837	14.2329	14.0746	10.3517	13.7156	15.3824	13.6208	7.66649	14.8631	10.3426	14.3418		4.50605	2.93806	5.13189	9.49754	5.1488	7.18024	5.22661	13.0598
7.43725	5.47201	5.67391	6.19598	5.88537	4.66879	4.15627	4.7341	7.86534	5.51103	6.34093	3.88468	6.68779	4.64012	8.12777	5.42103	6.67305	5.31989	8.74542	4.45335		15.4822	16.9534	18.6323	18.596	7.08568	21.012	11.9177	18.5163	11.9903	13.4756	14.1028	14.1058	10.3144	13.7025	15.3733	13.6279	7.65842	14.8742	10.2116	14.3428		4.52803	2.98542	5.2283	9.47555	5.16571	7.58619	5.30441	13.0225
7.5376	5.47758	5.69063	6.19638	5.90169	4.666	4.17857	4.6883	7.82313	5.50426	6.33416	3.96313	6.68699	4.61184	8.23409	5.39276	6.71128	5.35692	8.64148	4.50711		15.4661	16.786	18.5698	18.4437	7.10786	20.9676	11.833	18.4982	11.8673	13.4816	13.9243	14.132	10.3174	13.6823	15.3945	13.6279	7.65741	14.8903	10.0976	14.368		4.59569	3.01418	5.39744	9.63962	5.1691	8.08856	5.40759	13.031
7.71123	5.50705	5.69023	6.19359	5.90488	4.66202	4.18614	4.68193	7.77892	5.53811	6.33257	3.96831	6.67624	4.61503	8.39338	5.39555	6.75867	5.4067	8.57458	4.58516		15.3854	16.5793	18.5799	18.2481	7.10282	20.9344	11.7261	18.48	11.6969	13.4887	13.6692	14.1441	10.2993	13.6742	15.463	13.6147	7.67354	14.9014	10.0401	14.4244		4.67012	3.04293	5.41436	10.0084	5.17925	8.45222	5.46003	13.1122
7.88206	5.51263	5.68745	6.18483	5.89373	4.666	4.18614	4.67715	7.74906	5.53333	6.33217	3.96751	6.66429	4.71458	8.56382	5.3848	6.78894	5.41347	8.59608	4.63733		15.3632	16.3927	18.5526	18.0676	7.07862	20.891	11.6343	18.4629	11.5547	13.4887	13.6127	14.133	10.2398	13.6823	15.4893	13.5956	7.68665	14.9105	10.0351	14.5142		4.71917	3.07338	5.39744	10.0929	5.18939	8.62644	5.45495	13.1968
8.01547	5.4967	5.68466	6.18563	5.88497	4.66958	4.1945	4.70622	7.73552	5.53971	6.33297	3.96751	6.6627	4.82091	8.71515	5.3382	6.81482	5.41347	8.63312	4.67516		15.3743	16.2375	18.3379	18.0202	7.05946	20.8275	11.5849	18.4558	11.466	13.4826	13.5986	14.1199	10.14	13.6843	15.4903	13.5875	7.67052	14.9256	10.0381	14.6372		4.73439	3.08353	5.4059	10.1115	5.20124	8.69071	5.44988	13.2492
8.11065	5.49829	5.64962	6.23461	5.87143	4.66958	4.19809	4.77352	7.74746	5.61417	6.31266	3.96911	6.64	4.94874	8.80515	5.30754	6.84031	5.40869	8.62834	4.70941		15.3743	16.0479	17.9416	18.0656	7.07358	20.7287	11.5759	18.4407	11.4609	13.4705	13.4443	14.1361	10.0129	13.6702	15.4005	13.5865	7.56162	14.9337	10.0341	14.738		4.72255	3.07	5.42789	10.2113	5.20124	8.72454	5.51246	13.2526
8.13852	5.4967	5.57435	6.29235	5.85391	4.66919	4.19809	4.79104	7.78569	5.70338	6.24138	3.96911	6.59261	5.04232	8.8382	5.30754	6.85703	5.39515	8.64546	4.70981		15.3733	15.8371	17.4656	18.0424	7.07761	20.6147	11.5819	18.4326	11.4891	13.4605	13.2346	14.128	9.83242	13.645	14.9669	13.5845	7.42347	14.9145	10.022	14.7743		4.69041	3.06154	5.50739	10.3145	5.18939	8.72624	5.59873	13.2103
8.12976	5.48395	5.42581	6.31505	5.85391	4.67158	4.19809	4.78706	7.85976	5.72169	6.16651	3.9711	6.56314	5.07896	8.80515	5.25657	6.84509	5.4294	8.64387	4.70423		15.3703	15.6556	17.1389	17.9043	7.06349	20.5189	11.5456	18.4306	11.5043	13.4514	13.0803	14.0544	9.62874	13.6309	14.3085	13.5845	7.30953	14.8621	10.0129	14.7582		4.69718	3.06154	5.61226	10.3923	5.16571	8.71439	5.6038	13.1968
8.11781	5.48435	5.2494	6.30828	5.86067	4.69029	4.19211	4.7775	7.93901	5.71692	6.08687	3.9699	6.55677	5.10166	8.70161	5.17414	6.81323	5.47878	8.60006	4.6887		15.3864	15.4691	17.1359	17.6875	7.05643	20.4181	11.4387	18.4316	11.4851	13.4373	13.0511	13.9384	9.5884	13.647	13.6934	13.5885	7.17643	14.8016	10.0129	14.7411		4.70902	3.0497	5.65285	10.4262	5.16064	8.70255	5.63932	13.1951
8.10188	5.49311	5.14945	6.34651	5.87143	4.70343	4.16304	4.78427	7.98043	5.71851	6.03151	3.96592	6.56474	5.10007	8.55546	5.14068	6.78177	5.48395	8.55228	4.67795		15.4076	15.2523	17.1994	17.4757	7.08164	20.2981	11.3964	18.4316	11.3611	13.407	13.043	13.882	9.58538	13.6853	13.0884	13.5966	7.0524	14.7885	10.0119	14.7108		4.6938	3.02264	5.68161	10.4092	5.25198	8.82265	5.66469	13.1832
8.09073	5.52856	5.09887	6.44248	5.87939	4.70264	4.12441	4.79264	7.98162	5.71453	6.08567	3.96592	6.54921	5.12754	8.34639	5.13312	6.73557	5.48316	8.50608	4.67476		15.4096	15.0516	17.1359	17.3305	7.08568	20.1811	11.3762	18.4336	11.1665	13.3869	13.0097	13.8809	9.57832	13.7236	12.5519	13.6037	7.00501	14.8016	9.95443	14.6009		4.6938	3.00234	5.70191	10.394	5.40421	8.94782	5.65962	13.1376
8.09312	5.57037	5.05108	6.45761	5.87979	4.70383	4.08499	4.79264	7.95613	5.71692	6.14979	3.96672	6.48469	5.17692	8.03299	5.14825	6.71208	5.48316	8.47263	4.67118		15.4025	14.8974	17.0492	17.2166	7.06248	20.0853	11.1241	18.4367	10.99	13.3768	12.9926	13.8809	9.55513	13.7357	12.4219	13.6047	7.00904	14.8117	9.76789	14.4618		4.7124	2.96513	5.70698	10.3991	5.52261	8.94105	5.65624	13.08
8.10746	5.62174	5.02002	6.45921	5.88178	4.72494	4.03402	4.79303	7.88923	5.75554	6.18324	3.96114	6.43014	5.2048	7.70127	5.16657	6.70531	5.48316	8.46546	4.66441		15.4036	14.7259	17.023	17.0704	7.0524	19.9895	10.989	18.4417	10.9356	13.3798	12.9906	13.8739	9.46236	13.7357	12.312	13.5795	6.95661	14.8187	9.47345	14.3811		4.73101	2.94145	5.69514	10.3991	5.57336	9.03916	5.69345	13.0462
8.12418	5.68227	5.02162	6.4616	5.88736	4.75082	3.96512	4.79781	7.80242	5.74439	6.19518	3.95358	6.36045	5.21515	7.45955	5.17095	6.66708	5.48356	8.49334	4.65883		15.34	14.488	17.026	16.8636	7.09274	19.8373	10.9708	18.4427	10.989	13.3969	12.9896	13.8517	9.38371	13.7327	11.6031	13.5351	6.92333	14.8328	9.14372	14.3599		4.74285	2.93976	5.64271	10.3991	5.57843	9.37576	5.7222	13.0411
8.14211	5.68745	5.05467	6.44766	5.87262	4.73848	3.89026	4.79941	7.74547	5.71054	6.18284	3.95159	6.25253	5.26135	7.32136	5.16936	6.61491	5.48236	8.58692	4.64609		15.0406	14.2248	17.0189	16.6348	7.11089	19.6386	10.9255	18.4488	11.0243	13.4171	12.9835	13.8215	9.36757	13.7226	11.1826	13.5432	6.91123	14.849	8.73635	14.3771		4.72086	2.94314	5.57336	10.394	5.57336	10.142	5.72559	13.0428
8.15963	5.64962	5.10763	6.42576	5.82165	4.72892	3.83291	4.79503	7.71999	5.68147	6.18125	3.94561	6.20594	5.32705	7.26282	5.16975	6.61651	5.48156	8.70519	4.6222		14.6856	13.9576	16.9352	16.4139	7.05442	19.4783	10.7742	18.4599	11.0273	13.4302	12.9815	13.7589	9.36757	13.7025	11.1534	13.5593	6.73477	14.8772	8.31687	14.4345		4.68196	2.91269	5.54629	10.394	5.57336	11.0604	5.72051	13.0428
8.14768	5.61298	5.15383	6.42934	5.77147	4.77392	3.7907	4.79662	7.71999	5.66833	6.18244	3.903	6.26089	5.33781	7.23933	5.17573	6.62407	5.48196	8.71356	4.59711		14.5374	13.6692	16.8374	16.2496	6.99392	19.3472	10.632	18.477	11.0273	13.4332	12.8867	13.7025	9.37261	13.6803	11.1362	13.5421	6.37479	14.9074	8.1999	14.5001		4.69549	2.87717	5.53276	10.3974	5.57336	11.6254	5.7222	13.0395
8.10746	5.58869	5.17095	6.44089	5.7205	4.8221	3.768	4.79224	7.75583	5.66554	6.19439	3.87791	6.3481	5.3382	7.20548	5.13591	6.61531	5.49152	8.6375	4.56326		14.4779	13.404	16.8072	16.1608	6.95358	19.1677	10.5494	18.5042	11.0233	13.4151	12.7143	13.6904	9.39278	13.6672	11.0354	13.519	6.03094	14.9155	8.18982	14.5364		4.74792	2.85349	5.52261	10.4075	5.5649	11.8334	5.71882	13.0428
8.08914	5.57037	5.16975	6.43292	5.6751	4.85356	3.76442	4.79901	7.78689	5.67112	6.24735	3.8807	6.42536	5.33741	7.178	5.10206	6.61491	5.49749	8.5463	4.52583		14.485	13.2064	16.8021	16.1064	6.91829	18.9489	10.4334	18.5274	11.0233	13.3516	12.6729	13.6763	9.39278	13.6611	10.9366	13.4867	5.82927	14.9226	8.06781	14.5525		4.84265	2.83827	5.57336	10.4414	5.56997	11.8588	5.70022	13.0395
8.13972	5.56121	5.17294	6.43213	5.65838	4.8683	3.76442	4.82688	7.80122	5.67231	6.33775	3.86398	6.48947	5.33741	7.22181	5.12037	6.61013	5.49351	8.40055	4.50552		14.492	13.1116	16.8052	16.062	6.9435	18.7735	10.2297	18.5325	11.0233	13.2437	12.6145	13.6712	9.29296	13.651	10.8821	13.4453	5.73751	14.9448	7.94177	14.5475		4.94244	2.82643	5.663	10.4583	5.55982	11.8605	5.66977	13.0496
8.20781	5.58271	5.17374	6.43651	5.65161	4.85078	3.75845	4.84759	7.81636	5.66554	6.4154	3.85641	6.53567	5.3386	7.28234	5.11002	6.59859	5.45369	8.23808	4.50074		14.4123	13.1751	16.8102	16.0237	6.97476	18.6131	10.1047	18.5103	11.0243	13.1741	12.4279	13.6813	9.17901	13.6006	10.8609	13.399	5.74356	14.9498	7.78648	14.4819		5.0304	2.85857	5.69345	10.4414	5.49724	11.8639	5.67823	13.0767
8.2329	5.5855	5.17374	6.43492	5.64046	4.84879	3.72261	4.84719	7.84662	5.65001	6.4608	3.82535	6.5508	5.34975	7.31539	5.11361	6.58783	5.4071	8.15206	4.50273		14.2954	13.3122	16.7759	15.9834	7.004	18.4266	10.1047	18.5002	11.0233	13.1317	12.2404	13.6742	9.13364	13.5341	10.8549	13.3334	5.73146	14.8974	7.57473	14.3065		5.06592	2.95667	5.69852	10.4397	5.47694	11.8639	5.71713	13.0784
8.22533	5.59227	5.17652	6.4389	5.63727	4.88463	3.68438	4.84679	7.89003	5.6297	6.47354	3.7903	6.54244	5.35095	7.32296	5.11639	6.55996	5.41745	8.09631	4.48998		14.1976	13.3455	16.6499	15.945	7.05341	18.2491	10.1027	18.5173	10.9648	13.0793	12.0831	13.6611	9.09431	13.5179	10.8408	13.2548	5.70323	14.8127	7.40633	14.1018		5.049	3.03786	5.69683	10.4515	5.48033	11.874	5.76787	13.0648
8.21697	5.609	5.1825	6.49863	5.63727	4.92883	3.66008	4.84759	7.92786	5.6317	6.47474	3.77119	6.52332	5.34816	7.32256	5.11838	6.50978	5.45289	8.01388	4.47883		14.1461	13.2225	16.5087	15.9097	7.08769	18.1009	10.0976	18.5426	10.9033	13.037	11.9086	13.6581	9.02877	13.5371	10.8226	13.2033	5.69214	14.7522	7.3055	14.002		5.02702	3.15626	5.69683	10.4532	5.49555	11.9332	5.80678	13.0716
8.19268	5.61975	5.18767	6.58943	5.64006	4.95073	3.62703	4.8448	7.94658	5.60979	6.46916	3.77437	6.47713	5.33263	7.32216	5.12595	6.4608	5.4955	7.92547	4.4864		14.124	13.0975	16.3938	15.8593	7.09576	17.9275	10.0976	18.4972	10.9063	13.0269	11.7906	13.6611	8.98541	13.5482	10.8267	13.1862	5.65886	14.7169	7.246	14.012		5.0101	3.3271	5.70191	10.4549	5.50062	12.0229	5.79494	13.0631
8.18033	5.63408	5.18767	6.62527	5.66714	4.95352	3.57327	4.82131	7.94618	5.59745	6.45921	3.77199	6.44168	5.30635	7.32017	5.12276	6.42337	5.52856	7.88047	4.49636		14.0977	13.167	16.2697	15.823	7.09576	17.6996	10.0482	18.4004	10.9093	13.0289	11.7453	13.6631	8.96726	13.52	10.8357	13.1781	5.58626	14.6937	7.21777	14.0836		5.00333	3.38292	5.70191	10.4498	5.49555	12.0922	5.74588	13.0496
8.18949	5.63687	5.20161	6.62885	5.69581	4.94396	3.53703	4.79064	7.93264	5.60263	6.45602	3.77358	6.45961	5.26294	7.31579	5.11241	6.4166	5.54289	7.86375	4.50392		14.0655	13.3062	16.2112	15.819	7.08265	17.5251	9.83746	18.354	10.743	13.036	11.7231	13.6662	8.96827	13.4786	10.8428	13.16	5.53483	14.6715	7.2087	14.1189		5.02025	3.38123	5.70191	10.438	5.49217	12.1616	5.71713	13.0259
8.19626	5.63369	5.21197	6.63801	5.70497	4.92086	3.545	4.79622	7.93025	5.60621	6.45682	3.77398	6.51018	5.21276	7.3134	5.11958	6.43571	5.54369	7.86614	4.50631		14.0362	13.5371	16.2032	15.8079	7.05744	17.3829	9.54504	18.3338	10.5262	13.045	11.7059	13.6541	8.96423	13.4363	10.8347	13.1257	5.53685	14.6463	7.19155	14.0514		5.05746	3.39983	5.71036	10.4329	5.45834	12.2411	5.72051	13.0158
8.20144	5.63847	5.21197	6.65115	5.70696	4.91688	3.55416	4.82051	7.93582	5.6078	6.45124	3.76561	6.60974	5.18489	7.31937	5.12595	6.46359	5.52696	7.92388	4.51268		13.9757	13.9445	16.2082	15.7635	7.04433	17.2105	9.28993	18.3076	10.4788	12.9986	11.7019	13.6208	8.95213	13.402	10.8256	13.1186	5.55097	14.611	7.16433	13.9001		5.05239	3.4269	5.71375	10.4414	5.45157	12.2986	5.73066	13.0496
8.21458	5.65639	5.21197	6.66549	5.69581	4.93241	3.53902	4.79622	7.9187	5.60501	6.43014	3.75645	6.76345	5.1813	7.30105	5.1156	6.48668	5.46763	8.02065	4.51786		13.8285	14.3024	16.2183	15.7202	7.05038	17.0089	9.10742	18.3016	10.4768	12.8716	11.716	13.6057	8.99146	13.3959	10.8529	13.1449	5.60744	14.5686	7.15021	13.7549		5.05239	3.51654	5.71375	10.4414	5.46849	12.3307	5.73404	13.1325
8.26356	5.6536	5.22113	6.67903	5.68147	4.93998	3.53186	4.74485	7.91193	5.58032	6.415	3.74969	6.89287	5.19524	7.22499	5.08533	6.52252	5.38559	8.06843	4.49954		13.7126	14.4728	16.1881	15.702	7.06349	16.8092	9.06103	18.3116	10.4647	12.7274	11.7453	13.5905	9.04893	13.4221	10.8236	13.1428	5.67399	14.5233	7.1492	13.643		5.06592	3.65186	5.71375	10.4481	5.50232	12.346	5.73404	13.1883
8.35595	5.64524	5.24064	6.67186	5.67112	4.93719	3.53066	4.72414	7.91074	5.56798	6.40385	3.75168	6.9769	5.2275	7.17721	5.07976	6.61133	5.31033	8.07361	4.49158		13.6279	14.5576	16.1265	15.7051	7.08568	16.6146	9.06003	18.3096	10.4606	12.6114	11.7725	13.524	9.07515	13.4524	10.8105	13.1106	5.72541	14.4436	7.14013	13.5744		5.07099	3.7618	5.7239	10.4684	5.55644	12.3578	5.73235	13.1917
8.46626	5.63886	5.23108	6.6615	5.68546	4.94157	3.52509	4.72334	7.896	5.57316	6.38792	3.77915	7.02787	5.25219	7.18796	5.07338	6.7077	5.27449	8.05489	4.49277		13.6047	14.5959	15.9339	15.7081	7.12803	16.4462	9.05902	18.3096	10.4616	12.5328	11.7785	13.4534	9.07112	13.4423	10.7853	13.0712	5.71533	14.3448	7.11492	13.5774		5.08283	3.85483	5.7425	10.4854	5.65624	12.3815	5.73404	13.1917
8.53834	5.61378	5.2263	6.64757	5.76152	4.98139	3.52947	4.72334	7.8729	5.57435	6.38036	3.78871	7.06769	5.28405	7.2007	5.0483	6.73597	5.28882	8.02144	4.51308		13.6178	14.5807	15.5901	15.699	7.14315	16.2859	8.99347	18.3429	10.4515	12.4985	11.7725	13.4292	9.07818	13.3869	10.6804	13.0591	5.7113	14.3024	7.12097	13.6006		5.0896	3.91234	5.76618	10.5023	5.76111	12.4052	5.73404	13.1917
8.54869	5.58072	5.24144	6.60735	5.87103	4.99414	3.53066	4.72016	7.85379	5.57435	6.38155	3.78592	7.10075	5.31909	7.2007	5.00808	6.72403	5.294	8.09073	4.56684		13.6228	14.5515	15.4873	15.6909	7.12702	16.0439	8.90575	18.3963	10.4526	12.4743	11.7624	13.4262	9.11549	13.3274	10.5554	13.0884	5.7113	14.2833	7.13307	13.5996		5.0896	3.91911	5.79494	10.5412	5.83553	12.4119	5.73235	13.1968
8.54391	5.53333	5.23905	6.57708	5.97895	4.99414	3.53584	4.71896	7.82751	5.57355	6.37916	3.78553	7.12225	5.31829	7.20229	4.96148	6.75549	5.2932	8.211	4.63932		13.6258	14.5162	15.578	15.6889	7.11895	15.7484	8.85331	18.4639	10.4334	12.4188	11.7009	13.4191	9.13565	13.3011	10.384	13.1307	5.69214	14.2258	7.15122	13.5956		5.07776	3.92249	5.7425	10.6291	5.84906	12.4119	5.72559	13.2018
8.55228	5.50426	5.23905	6.57111	6.06337	4.99334	3.5438	4.7102	7.77972	5.57714	6.37478	3.79668	7.12424	5.30396	7.20747	4.94715	6.79252	5.28405	8.29024	4.74724		13.6228	14.4527	15.6496	15.6919	7.15525	15.5336	8.83718	18.5315	10.3205	12.3493	11.598	13.402	9.12759	13.2588	10.0613	13.1166	5.61954	14.1391	7.13206	13.6369		5.07776	3.95294	5.66977	10.7154	5.83215	12.417	5.71036	13.2018
8.55228	5.50944	5.23546	6.54841	6.09841	4.99971	3.56013	4.6668	7.74269	5.57355	6.36841	3.79707	7.12106	5.29042	7.21026	4.94555	6.81243	5.19444	8.36193	4.89299		13.6016	14.3771	15.6294	15.7071	7.22685	15.3955	8.84726	18.5708	10.1218	12.2807	11.5406	13.3949	9.12658	13.16	9.79915	13.0854	5.59534	14.0836	7.08568	13.6884		5.06254	3.99184	5.65624	10.7949	5.8423	12.4255	5.70022	13.2052
8.58055	5.50187	5.23188	6.52292	6.11036	5.0475	3.60513	4.62737	7.70366	5.57037	6.36841	3.79787	7.12583	5.29121	7.21265	4.92803	6.8196	5.09608	8.4344	4.99294		13.5583	14.3004	15.4419	15.7192	7.26819	15.2856	8.88457	18.5819	10.0018	12.2031	11.4891	13.402	9.12658	13.0632	9.77596	13.0712	5.60441	14.0383	7.03828	13.7005		5.0507	4.00707	5.65285	10.8406	5.84568	12.4288	5.70191	13.2221
8.69484	5.49988	5.23307	6.49306	6.10957	5.06462	3.59637	4.61543	7.66901	5.58869	6.37478	3.7907	7.13141	5.29042	7.24809	4.92166	6.82119	5.10245	8.4794	5.03595		13.4837	14.2782	15.3148	15.7353	7.3055	15.1928	8.87751	18.5688	9.89192	12.1446	11.3722	13.3889	9.12859	12.9815	9.70436	13.0319	5.62458	13.9717	7.05543	13.6551		5.07776	4.00707	5.65793	10.8507	5.85076	12.4288	5.70191	13.2272
8.79639	5.50546	5.23586	6.47753	6.09324	5.05785	3.59876	4.61702	7.6495	5.58391	6.37399	3.7457	7.12225	5.29281	7.32335	4.9794	6.82119	5.09409	8.50449	5.05069		13.3264	14.3428	15.2624	15.7091	7.31861	15.0708	8.71517	18.5506	9.63882	12.1204	11.2088	13.3344	9.11246	12.916	9.3948	12.9674	5.67298	13.9011	6.8951	13.53		5.11497	4.01214	5.67146	10.8625	5.9015	12.4288	5.7222	13.1849
8.85095	5.51143	5.2494	6.47952	6.08288	5.05387	3.68477	4.62578	7.6491	5.56639	6.37478	3.67402	7.09358	5.29639	7.41296	5.0694	6.81044	5.06502	8.51803	5.04591		13.1398	14.4698	15.1414	15.7343	7.31155	14.8873	8.65769	18.5375	9.19212	12.0871	11.1453	13.2487	9.06305	12.9018	9.16994	12.9432	5.71029	13.8356	6.54218	13.3717		5.11497	4.02229	5.64778	10.8981	5.93533	12.4271	5.76449	13.1054
8.88002	5.52139	5.28405	6.49584	6.07532	5.05228	3.73495	4.63175	7.65508	5.5867	6.36403	3.61548	7.088	5.29719	7.47627	5.12436	6.7746	5.0467	8.51803	5.05706		13.0874	14.6181	14.9629	15.7978	7.32869	14.6967	8.66173	18.5194	8.73836	12.0296	11.1524	13.1892	8.97633	12.9008	9.14372	12.9512	5.71432	13.7862	6.2679	13.2558		5.10144	4.05443	5.57166	10.9505	5.92518	12.4271	5.77295	13.031
8.91068	5.52338	5.36449	6.53089	6.07412	5.05865	3.73495	4.62817	7.6499	5.59347	6.32819	3.59119	7.0896	5.28604	7.52008	5.11759	6.74951	5.05307	8.51245	5.09449		13.0884	14.6826	14.8873	15.815	7.32062	14.5535	8.4893	18.5002	8.55182	11.9711	11.1534	13.1388	8.82508	12.8857	9.14372	12.9442	5.71936	13.762	6.15598	13.1469		5.08452	4.10179	5.49893	10.9793	5.91334	12.4271	5.77802	13.0395
8.93935	5.51263	5.40829	6.55836	6.08926	5.02998	3.75685	4.63056	7.6499	5.58869	6.31585	3.59955	7.0896	5.2713	7.54278	5.10484	6.74195	5.12953	8.50728	5.16697		13.0541	14.6886	14.8863	15.815	7.32163	14.4557	8.3199	18.4972	8.54678	11.9096	11.1544	13.0914	8.57904	12.8232	9.1417	12.919	5.74054	13.7357	6.14892	13.0097		5.08114	4.12378	5.46172	10.9708	5.91503	12.4271	5.77971	13.0581
8.97758	5.49749	5.41148	6.54522	6.09921	5.00728	3.79906	4.6206	7.65508	5.59227	6.35009	3.60115	7.08442	5.27807	7.5384	5.0925	6.72403	5.15462	8.50648	5.26135		13.0067	14.6927	14.8883	15.8331	7.34281	14.367	8.2715	18.4962	8.15251	11.8562	11.1534	13.0662	8.26645	12.7062	9.13767	12.8837	5.75163	13.6934	6.15094	12.8948		5.13019	4.13562	5.44819	10.9268	5.9201	12.4255	5.78141	13.0344
9.03692	5.48196	5.40431	6.60735	6.09085	4.99892	3.86238	4.58436	7.66105	5.609	6.39908	3.59716	7.07287	5.27648	7.5161	5.08931	6.70929	5.12436	8.51803	5.30157		12.9805	14.6967	14.8873	15.8956	7.36902	14.2107	8.25133	18.4942	7.52128	11.8259	11.1645	13.0481	8.02143	12.553	9.13767	12.8232	5.74356	13.6369	6.14085	12.8272		5.16571	4.14915	5.47018	10.8812	5.92518	12.4255	5.78141	12.9955
9.08908	5.47679	5.42064	6.7523	6.07611	4.99493	3.99141	4.56644	7.68295	5.61616	6.42138	3.55774	7.07168	5.25338	7.51848	5.08732	6.7081	5.10206	8.57219	5.30993		12.9644	14.6886	14.8732	15.9924	7.38012	13.9707	8.17873	18.5063	7.30449	11.8098	11.2078	13.0269	7.75421	12.439	9.13666	12.7818	5.79398	13.5542	6.038	12.7566		5.19447	4.16945	5.49386	10.8778	5.93364	12.4238	5.78141	13.0022
9.11975	5.48316	5.44891	6.78177	6.06974	5.00091	4.23194	4.56405	7.71919	5.58112	6.42098	3.51115	7.07327	5.26692	7.53282	5.09728	6.68142	5.08971	8.64427	5.31312		12.919	14.6745	14.857	16.2405	7.39222	13.7962	8.02243	18.5032	7.2823	11.7916	11.2683	13.0521	7.2944	12.3624	9.13464	12.7718	6.05514	13.4252	5.77885	12.682		5.23506	4.19482	5.526	10.8828	5.97085	12.4187	5.77802	13.0479
9.14404	5.48117	5.46803	6.75031	6.06098	4.99931	4.46768	4.5322	7.75702	5.53055	6.42854	3.48646	7.07646	5.29241	7.53083	5.11201	6.61531	5.08892	8.67095	5.31312		12.8827	14.6513	14.8157	16.6438	7.4144	13.7519	7.79656	18.4669	7.29541	11.7614	11.3268	13.0823	7.12702	12.2686	9.02473	12.7597	6.34454	13.281	5.53685	12.6114		5.27059	4.21342	5.56659	10.8727	5.99453	12.4153	5.76957	13.08
9.16116	5.47918	5.48156	6.7515	6.04744	5.00051	4.67357	4.46768	7.7837	5.48833	6.45124	3.4773	7.07725	5.29878	7.53879	5.12914	6.58943	5.09409	8.67135	5.31033		12.8817	14.6332	14.6675	16.8919	7.33373	13.7226	7.54548	18.4367	7.3176	11.718	11.3429	13.0844	7.06853	12.2141	8.85936	12.7929	6.4	13.1519	5.46627	12.5489		5.27904	4.2388	5.57674	10.9133	6.00299	12.4119	5.75773	13.1223
9.15917	5.45608	5.50187	6.74911	6.03749	4.99454	4.87865	4.38207	7.80441	5.45289	6.49664	3.4777	7.06769	5.29081	7.53879	5.15183	6.60735	5.0921	8.66378	5.30197		12.8837	14.6302	14.5777	17.0583	7.22685	13.6712	7.44767	18.4236	7.30751	11.6454	11.1715	13.0965	6.99089	12.2283	8.8271	12.8504	6.37076	13.0652	5.50458	12.5005		5.27735	4.27939	5.59704	10.9928	6.00637	12.4102	5.74927	13.1697
9.28621	5.43497	5.53493	6.74673	6.0335	4.97821	5.00529	4.31636	7.84463	5.44294	6.51137	3.4773	7.04898	5.29997	7.52087	5.20838	6.62407	5.09529	8.6582	5.30555		12.8928	14.6281	14.5767	17.2095	7.26617	13.5986	7.49708	18.4488	7.29743	11.5406	10.9487	13.1408	6.95762	12.2313	8.82206	12.8766	6.32034	13.0561	5.55198	12.4582		5.29427	4.30138	5.65285	11.0351	6.04189	12.4052	5.74419	13.1528
9.51598	5.44612	5.57037	6.74155	6.03231	4.97502	5.04192	4.31716	7.90198	5.43895	6.50022	3.45818	7.045	5.31192	7.5161	5.27927	6.60536	5.08294	8.6582	5.32506		12.8887	14.6261	14.5475	17.2388	7.29642	13.5079	7.51423	18.4891	7.31558	11.4821	10.9063	13.1499	6.95056	12.1557	8.72929	12.8121	6.15396	13.1146	5.55198	12.3916		5.29596	4.27601	5.67823	11.0385	6.0994	12.3899	5.74419	13.1629
9.6904	5.44334	5.62532	6.71726	6.01957	4.97781	5.05427	4.33866	7.96051	5.43935	6.52372	3.40642	7.03106	5.31272	7.51689	5.3159	6.54403	5.05268	8.66458	5.34338		12.8555	14.6261	14.5374	17.2367	7.3418	13.3889	7.50313	18.5325	7.30953	11.473	10.9335	13.1227	6.90821	12.1133	8.65064	12.7637	5.94624	13.2114	5.47332	12.316		5.34501	4.25233	5.68161	11.0283	6.13323	12.3713	5.75096	13.1545
9.8023	5.41307	5.68267	6.7296	5.99727	4.96547	5.04909	4.34662	8.00153	5.43099	6.55797	3.4092	6.98725	5.4063	7.51291	5.36289	6.45801	5.03993	8.70161	5.34099		12.8282	14.6201	14.5223	17.2519	7.41238	13.2356	7.50112	18.5133	7.3055	11.4448	10.9315	13.1196	6.68536	12.1486	8.62845	12.6588	5.88977	13.288	5.37652	12.2706		5.43466	4.2574	5.67315	10.9877	6.13661	12.3679	5.75434	13.0496
9.8266	5.34099	5.70377	6.7519	5.9682	4.90175	5.04352	4.34782	8.01308	5.43776	6.5958	3.40642	6.95619	5.61099	7.5141	5.42342	6.38554	5.04352	8.76533	5.34458		12.803	14.613	14.4809	17.3759	7.42045	13.0602	7.46885	18.4568	7.29138	11.3833	10.9315	13.1096	6.61074	12.1778	8.61837	12.5419	5.89683	13.2759	5.32106	12.2363		5.43127	4.26755	5.70191	10.9776	6.14169	12.3679	5.75603	13.0141
9.80907	5.24382	5.70815	6.81721	5.92758	4.84122	5.0471	4.3307	8.01228	5.43856	6.64239	3.41358	6.93509	5.72169	7.53362	5.43218	6.33018	5.05108	8.82904	5.33064		12.7919	14.6181	14.4406	17.6562	7.44667	12.8565	7.35188	18.4488	7.22685	11.357	10.8861	13.0904	6.61074	12.1426	8.61938	12.4804	5.93011	13.1559	5.30796	12.1829		5.4465	4.26248	5.77464	10.9708	6.15183	12.3629	5.76111	13.0581
9.79275	5.20161	5.71015	6.89447	5.88497	4.83047	5.0483	4.28689	8.02104	5.39555	6.66469	3.44903	6.91756	5.73364	7.57782	5.43577	6.28916	5.06144	8.91068	5.3175		12.7929	14.6241	14.4234	17.871	7.4749	12.6729	7.29743	18.4457	7.18651	11.3369	10.8478	13.0743	6.57747	12.0921	8.56291	12.4511	5.97548	13.043	5.31703	12.1325		5.44311	4.24725	5.81862	10.9201	6.13154	12.3595	5.76449	13.0496
9.7804	5.24382	5.71492	6.92632	5.86665	4.83405	5.0483	4.263	8.06246	5.37205	6.66628	3.45938	6.91677	5.6978	7.63556	5.43975	6.2585	5.05029	9.02059	5.31391		12.7728	14.6251	14.4345	18.0142	7.47792	12.5842	7.29642	18.4306	7.16735	11.2915	10.8468	13.042	6.57848	12.0064	8.43888	12.442	5.99162	12.9008	5.3251	12.0942		5.44142	4.2388	5.78817	10.9336	6.13999	12.3629	5.76618	12.96
9.77761	5.25856	5.73961	6.93827	5.85988	4.83803	5.06861	4.263	8.09949	5.36568	6.65991	3.45938	6.91796	5.70537	7.67618	5.43696	6.23341	4.96825	9.10621	5.31232		12.6911	14.6342	14.4214	18.1009	7.50011	12.562	7.29138	18.3984	7.12904	11.2834	10.8408	12.9936	6.59864	11.8784	8.30276	12.4471	6.00573	12.7062	5.29485	12.0216		5.43635	4.24049	5.73574	10.9742	6.24825	12.3612	5.76449	12.8585
9.79992	5.2709	5.75992	6.93309	5.8551	4.83604	5.07816	4.23751	8.10627	5.36927	6.61292	3.44584	6.92354	5.74638	7.68415	5.43019	6.20275	4.92126	9.15479	5.31391		12.6155	14.6453	14.3589	18.0858	7.51523	12.5489	7.28735	18.3631	7.08467	11.3046	10.8125	12.9371	6.58755	11.7664	8.14142	12.4582	6.01884	12.4753	5.2888	11.9157		5.43804	4.24218	5.69176	11.0029	6.25501	12.3392	5.75773	12.7773
9.85129	5.33024	5.75515	6.90163	5.86386	4.83843	5.07816	4.20844	8.10865	5.36449	6.54841	3.4323	6.91995	5.75953	7.67379	5.41705	6.1681	4.94277	9.18028	5.31949		12.6114	14.6412	14.2803	18.0555	7.51322	12.5146	7.27625	18.3489	7.05341	11.3167	10.7702	12.8353	6.54722	11.7029	7.91555	12.4077	6.02388	12.2434	5.24241	11.8632		5.43127	4.23541	5.69007	10.9945	6.21611	12.2851	5.75096	12.7824
9.90226	5.3828	5.73404	6.86301	5.87063	4.84281	5.08015	4.18335	8.10786	5.33542	6.50142	3.43708	6.88849	5.75753	7.66742	5.41227	6.12948	4.98577	9.18227	5.32427		12.5943	14.6342	14.2308	18.0636	7.50918	12.4854	7.27625	18.3651	7.02719	11.3873	10.7651	12.7687	6.51999	11.6596	7.67052	12.3775	6.01481	12.0508	5.11939	11.8602		5.42451	4.22695	5.70191	10.9945	6.19074	12.2157	5.75265	12.8974
9.89788	5.37922	5.73046	6.84548	5.84275	4.85157	5.08852	4.22437	8.09392	5.2936	6.46279	3.43947	6.87137	5.74798	7.67021	5.41506	6.09483	4.93958	9.18585	5.33024		12.5267	14.6342	14.2127	18.0485	7.50112	12.5197	7.2813	18.4054	7.05744	11.5265	10.7157	12.7788	6.49579	11.6142	7.56263	12.562	5.99968	11.9036	5.04276	11.8663		5.41943	4.21342	5.69176	11.0012	6.18059	12.0669	5.76618	12.8771
9.90544	5.36449	5.7647	6.87615	5.77506	4.86989	5.08692	4.31596	8.07919	5.28046	6.44686	3.43987	6.8646	5.74121	7.67021	5.41387	6.06178	4.82051	9.16196	5.33263		12.4995	14.6392	14.2026	17.99	7.487	12.5398	7.28331	18.4417	7.11694	11.6152	10.5756	12.7919	6.46352	11.5547	7.5596	12.919	5.99968	11.7614	5.02864	11.9026		5.41774	4.20497	5.68838	10.9979	6.17044	11.803	5.80678	12.7147
10.0377	5.35891	5.85112	6.87854	5.654	4.86631	5.0925	4.3299	8.08157	5.21077	6.4373	3.4538	6.87057	5.74161	7.66424	5.40471	6.0578	4.79503	9.10183	5.33382		12.5086	14.6453	14.2087	17.9305	7.47692	12.5872	7.2571	18.475	7.11895	11.7271	10.5121	12.7869	6.43731	11.4801	7.56565	13.3072	6.00573	11.6162	5.02864	11.9732		5.41943	4.19651	5.68838	10.9725	6.14845	11.6271	5.8812	12.6301
10.2113	5.36727	5.95028	6.84628	5.4955	4.86392	5.0933	4.31596	8.07321	5.11918	6.4373	3.47889	6.89128	5.742	7.65348	5.38918	6.06337	4.80219	9.06877	5.3402		12.5136	14.6513	14.1935	17.8871	7.52028	12.803	7.25609	18.5103	7.11694	11.9338	10.4899	12.7617	6.44336	11.4236	7.51423	13.4756	6.0138	11.5204	5.02965	12.0165		5.42789	4.19143	5.68838	10.8473	6.12985	11.5966	5.94717	12.6098
10.3738	5.37444	6.04864	6.82478	5.33263	4.86511	5.0921	4.31835	8.06843	5.08931	6.41938	3.48566	6.88172	5.74121	7.64432	5.39435	6.06496	4.80777	9.06559	5.34935		12.5146	14.6594	14.1915	17.8377	7.64531	13.1993	7.25911	18.5163	7.12097	12.0064	10.4576	12.7143	6.45243	11.3933	7.45877	13.4191	6.00372	11.4781	5.01856	12.0256		5.47187	4.19651	5.69345	10.7374	6.12646	11.6017	6.01652	12.6081
10.4805	5.37604	6.15576	6.80606	5.16338	4.87188	5.09529	4.30043	8.06166	5.11281	6.4166	3.48128	6.83633	5.73882	7.70286	5.39316	6.07253	4.82808	9.06559	5.35413		12.5227	14.6654	14.1855	17.7812	7.63321	13.4958	7.25407	18.4921	7.11794	12.0074	10.4556	12.6276	6.45344	11.357	7.44969	13.3838	5.9896	11.473	5.01251	12.0276		5.55982	4.19651	5.73066	10.7458	6.05035	11.5966	6.10786	12.6047
10.5179	5.37165	6.20633	6.77341	4.95392	4.8687	5.09449	4.30083	8.01467	5.17175	6.417	3.50239	6.81363	5.73165	7.83189	5.39196	6.05302	4.8221	9.06678	5.35095		12.4864	14.6644	14.1956	17.7278	7.55355	13.4907	7.25306	18.477	7.09475	12.0306	10.4626	12.4995	6.40302	11.3147	7.45675	13.5069	5.98254	11.5728	5.04881	12.0286		5.61057	4.20327	5.7425	10.7425	6.05035	11.5814	6.18059	12.5929
10.5251	5.31551	6.20832	6.75549	4.74246	4.86312	5.09569	4.28331	7.91551	5.04392	6.43372	3.58044	6.8204	5.67789	7.9629	5.41825	6.00842	4.79064	9.07395	5.35254		12.4783	14.6574	14.1925	17.6986	7.52532	13.52	7.2581	18.474	7.06753	12.0518	10.4475	12.3573	6.37681	11.2804	7.47187	13.7196	5.98254	11.8622	5.06393	12.0296		5.61395	4.22019	5.73066	10.7036	6.09771	11.5662	6.22118	12.5946
10.5247	5.26971	6.17089	6.75549	4.59631	4.84839	5.0921	4.2841	7.81994	4.89936	6.52093	3.61389	6.83234	5.60422	8.02104	5.49351	5.93275	4.77073	9.08789	5.40789		12.4874	14.6564	14.1905	17.6834	7.51624	13.6732	7.22483	18.476	7.07156	12.0518	10.3719	12.2494	6.40706	11.2421	7.48599	13.9586	5.98254	12.1385	5.05284	12.0619		5.59873	4.20158	5.73066	10.6596	6.11801	11.5577	6.24825	12.5726
10.5326	5.27011	6.12191	6.74991	4.52543	4.85595	5.08215	4.2841	7.74866	4.85317	6.58943	3.61389	6.84509	5.56161	8.02542	5.53931	5.8332	4.77073	9.11975	5.46723		12.5116	14.6574	14.1714	17.6572	7.51523	13.892	7.20567	18.4861	7.10282	12.0589	10.2458	12.1829	6.48571	11.1947	7.52431	14.1502	5.97851	12.1829	5.06091	12.1294		5.59873	4.17452	5.72728	10.619	6.12477	11.5662	6.25332	12.4897
10.5295	5.26851	6.13864	6.73637	4.52144	4.84321	5.0921	4.28729	7.73472	4.86432	6.62168	3.61349	6.8411	5.53174	8.02542	5.564	5.77147	4.76277	9.16315	5.48196		12.5146	14.6584	14.1593	17.6038	7.50414	14.3014	7.21777	18.4871	7.09979	12.0619	10.1813	12.1052	6.52201	11.1574	7.51826	14.2107	5.97548	12.1506	5.04578	12.1466		5.59873	4.17283	5.7222	10.5784	6.12477	11.551	6.25332	12.3646
10.5657	5.25975	6.12948	6.70173	4.56206	4.80219	5.15502	4.28848	7.77176	4.90613	6.66628	3.61349	6.82279	5.51064	8.02622	5.57754	5.76948	4.7552	9.23722	5.48037		12.5167	14.6473	14.1219	17.5362	7.42549	14.8207	7.22785	18.471	7.09879	12.0619	10.1954	12.0296	6.52705	11.1372	7.3418	14.2087	5.97548	12.1456	5.03368	12.1415		5.6038	4.17283	5.7222	10.504	6.1197	11.5002	6.25671	12.2462
10.6055	5.24303	6.09403	6.6627	4.60905	4.76795	5.2271	4.27813	7.79087	4.94993	6.66987	3.61349	6.80248	5.50785	8.01826	5.57714	5.75554	4.76118	9.39771	5.46643		12.5116	14.6221	14.0221	17.506	7.33474	15.2725	7.23895	18.4518	7.09576	12.0861	10.2257	12.0306	6.58453	11.1322	7.05946	14.2016	5.96842	12.1264	5.04276	12.1325		5.60888	4.17621	5.7239	10.4312	6.0994	11.4782	6.26347	12.2208
10.6155	5.19843	6.06178	6.61651	4.61742	4.77113	5.29281	4.25264	7.79525	4.94874	6.62089	3.57447	6.77142	5.50984	7.98759	5.57674	5.7659	4.76994	9.58328	5.45369		12.5045	14.5888	13.9566	17.5171	7.31457	15.6758	7.25407	18.4609	7.06551	12.1587	10.0159	12.0468	6.59965	11.1312	6.90216	14.1855	5.9654	12.0488	5.04679	12.1345		5.60719	4.1779	5.75265	10.416	6.07572	11.463	6.32944	12.2259
10.6059	5.11361	6.0343	6.56434	4.61582	4.78029	5.3398	4.26897	7.77454	4.93918	6.57429	3.53106	6.73677	5.51422	7.93343	5.57236	5.78501	4.78706	9.69279	5.4505		12.5056	14.5767	13.9818	17.5473	7.31558	15.942	7.26415	18.481	7.03425	12.1547	9.50168	12.0558	6.59259	11.1312	6.8467	14.1724	5.9654	12.1073	5.04074	12.1365		5.61564	4.17959	5.80678	10.4143	6.05542	11.463	6.49351	12.1582
10.6167	5.01126	6.02554	6.52929	4.61821	4.78427	5.35095	4.33866	7.7176	4.93839	6.54483	3.49562	6.74394	5.52139	7.90835	5.57754	5.76709	4.79503	9.75173	5.44772		12.4703	14.5757	13.9848	17.5604	7.31558	16.0519	7.25407	18.5022	7.02518	12.1022	9.07616	12.0498	6.57545	11.1372	6.80838	14.1845	5.96641	12.5005	5.02663	12.1385		5.63256	4.17959	5.85921	10.3974	6.05373	11.4901	6.63898	12.1565
10.631	4.93878	6.02713	6.50102	4.61742	4.79781	5.34816	4.45693	7.65985	4.95631	6.55279	3.48606	6.81801	5.53811	7.96091	5.57594	5.76072	4.76038	9.76726	5.44334		12.4057	14.5686	13.8799	17.5675	7.31558	16.1124	7.23592	18.5123	6.98686	12.0518	8.85432	12.0135	6.5331	11.1372	6.80939	14.1905	5.99263	13.0188	5.01049	12.1607		5.68161	4.17959	5.88628	10.3636	6.05711	11.4985	6.70325	12.1785
10.5729	4.92325	6.02713	6.45284	4.61224	4.80856	5.35612	4.52503	7.59972	5.00091	6.56434	3.61907	6.90323	5.5859	8.01149	5.59904	5.77267	4.74166	9.77961	5.44772		12.3755	14.5515	13.8406	17.5887	7.31961	16.1578	7.25004	18.5093	6.92232	12.0377	8.74744	11.9147	6.48167	11.1352	6.80233	14.1915	6.00876	13.3274	5.00142	12.1849		5.663	4.17959	5.89642	10.3297	6.05373	11.4461	6.73201	12.1633
10.4745	4.93918	6.02713	6.4162	4.65246	4.80737	5.3836	4.51667	7.53999	5.01923	6.57748	3.83013	6.96814	5.6986	8.01587	5.6086	5.76789	4.76595	9.86722	5.43059		12.3634	14.5485	13.8638	17.625	7.33373	16.2092	7.27222	18.5012	6.88502	12.0407	8.7061	11.8108	6.43731	11.1332	6.79023	14.1905	6.00876	13.4968	5.00243	12.196		5.62917	4.17959	5.90657	10.3196	6.05373	11.3243	6.75399	12.1328
10.3698	4.90414	6.02594	6.44049	4.72295	4.80697	5.39077	4.50034	7.46393	5.03436	6.60894	3.86955	7.03106	5.85112	8.01189	5.60382	5.7651	4.78547	9.95164	5.41148		12.3543	14.5374	13.8416	17.6804	7.37205	16.2304	7.26718	18.4992	6.82855	12.0891	8.66879	11.7785	6.39798	11.1382	6.79124	14.1734	6.01582	13.6087	5.00444	12.196		5.64271	4.1779	5.92856	10.323	6.05373	11.1789	6.76922	12.0753
10.3124	4.85356	5.99249	6.50261	4.75003	4.79104	5.38002	4.49397	7.34645	5.10803	6.67106	3.86238	7.07008	5.9674	8.0083	5.56758	5.7655	4.78547	10.0221	5.39356		12.3563	14.5102	13.6873	17.7389	7.38415	16.2375	7.26415	18.4992	6.73679	12.2293	8.61434	11.7745	6.35462	11.1392	6.81342	14.1421	6.04405	13.645	5.00243	12.2172		5.68499	4.17452	5.94717	10.3179	6.04866	11.0994	6.76922	11.9908
10.2965	4.85675	5.91005	6.5512	4.74604	4.72374	5.35334	4.4868	7.23933	5.12874	6.71646	3.85044	7.08522	6.02315	7.99835	5.46683	5.78023	4.7329	10.1185	5.39117		12.3392	14.5071	13.4332	17.7137	7.19458	16.2455	7.24903	18.5073	6.70654	12.5066	8.59921	11.7735	6.30421	11.1382	6.8346	14.1149	6.07833	13.6581	4.99638	12.2293		5.67146	4.17452	5.96239	10.323	6.04866	11.0824	6.75399	11.9197
10.281	4.85755	5.8316	6.56075	4.74525	4.67197	5.31511	4.47684	7.20867	5.12595	6.7304	3.81698	7.10314	6.04027	7.98839	5.35373	5.8109	4.75361	10.2348	5.40152		12.2686	14.5233	13.283	17.6018	6.89409	16.2556	7.22785	18.5113	6.71763	12.8797	8.63551	11.7705	6.2679	11.1413	6.84468	14.0473	6.08943	13.6934	4.99234	12.2323		5.59196	4.17621	5.98776	10.3314	6.05035	11.052	6.72355	11.8876
10.2547	4.85237	5.78939	6.52651	4.74525	4.6668	5.23984	4.47804	7.20787	5.1367	6.7292	3.81141	7.11588	6.04744	7.98879	5.29639	5.83081	4.77113	10.3503	5.40073		12.1506	14.5334	13.2538	17.504	6.82552	16.2728	7.2218	18.5103	6.72065	13.1257	8.69702	11.7624	6.20236	11.1463	6.84367	13.8336	6.02893	13.7378	4.93184	12.2454		5.55644	4.17452	6.00975	10.3399	6.04527	11.0249	6.72355	11.8707
10.2674	4.8448	5.79656	6.5062	4.74525	4.67436	5.159	4.4876	7.21106	5.14108	6.69854	3.82216	7.09079	6.13664	7.97764	5.25856	5.83997	4.76914	10.4665	5.4055		12.0084	14.5243	13.2669	17.4737	6.81746	16.2838	7.17542	18.5103	6.72771	13.2487	8.75752	11.7564	6.01884	11.1524	6.82754	13.5573	5.91095	13.765	4.89857	12.2484		5.56152	4.16606	6.00975	10.3416	6.03512	11.0165	6.68634	11.8402
10.2905	4.84281	5.84076	6.52213	4.74604	4.64728	5.14148	4.50074	7.23296	5.18648	6.6858	3.84048	7.06371	6.20872	7.94538	5.20002	5.85391	4.77113	10.5394	5.40192		11.7947	14.5223	13.2154	17.5029	6.81645	16.2939	7.09979	18.5093	6.72771	13.3455	8.80391	11.7553	5.84137	11.1564	6.81947	13.3717	5.88876	13.761	4.89857	12.2494		5.63594	4.15253	6.01821	10.3416	6.03343	11.0199	6.55779	11.7945
10.2869	4.84401	5.86346	6.5496	4.75122	4.6656	5.14706	4.50751	7.27119	5.26613	6.68659	3.87075	7.05376	6.21111	7.92308	5.1821	5.86824	4.76954	10.549	5.40232		11.4781	14.5293	13.0208	17.5594	6.87594	16.297	7.10685	18.5002	6.72973	13.3687	8.84726	11.7523	5.82322	11.1564	6.81947	13.2023	5.88372	13.7347	4.88848	12.2444		5.663	4.15084	6.0402	10.3399	6.03174	11.0199	6.43938	11.7759
10.2794	4.82927	5.86147	6.60018	4.76237	4.71339	5.15144	4.51667	7.30902	5.31272	6.68699	3.86079	7.04738	6.21151	7.93821	5.1821	5.86545	4.77472	10.5585	5.40112		11.2048	14.5323	12.8847	17.6058	6.88602	16.2879	7.09072	18.4952	6.7257	13.3788	8.85634	11.7221	5.82625	11.1584	6.81947	13.0481	5.85549	13.7005	4.87638	12.2373		5.663	4.15253	6.03682	10.3247	6.02498	11.0199	6.39202	11.7709
10.2782	4.81175	5.86267	6.65075	4.78626	4.72215	5.1594	4.54773	7.34327	5.34537	6.69615	3.87154	7.05296	6.22465	7.99675	5.2052	5.86545	4.79463	10.6422	5.40909		11.0142	14.5344	12.8101	17.6401	6.88703	16.2808	6.98182	18.4992	6.7267	13.4927	8.85432	11.6797	5.8202	11.1705	6.80838	12.9028	5.85045	13.5795	4.88949	12.2404		5.64101	4.15253	6.01821	10.328	6.03512	11.0215	6.38864	11.7776
10.2838	4.84122	5.8551	6.67305	4.83365	4.78308	5.16537	4.57242	7.34486	5.36488	6.69774	3.90459	7.06013	6.26209	8.076	5.28922	5.8774	4.8006	10.7887	5.46245		10.8014	14.5394	12.6639	17.6804	6.88401	16.2768	6.95257	18.4901	6.73981	13.6299	8.85231	11.6464	5.83532	11.2078	6.79426	12.7708	5.80306	13.279	4.90361	12.2757		5.61057	4.14915	6.00468	10.3399	6.04358	11.0266	6.39033	11.7776
10.2861	4.87228	5.85152	6.67345	4.88224	4.81533	5.15821	4.57162	7.2911	5.35373	6.69973	3.90897	7.05933	6.29275	8.14728	5.33223	5.88935	4.78547	10.9341	5.46364		10.621	14.5162	12.4309	17.7167	6.88401	16.2788	6.95963	18.474	6.763	13.7307	8.85533	11.6001	5.85246	11.227	6.77813	12.6619	5.6639	12.9956	4.93688	12.3069		5.61057	4.15422	6.0013	10.3416	6.04696	11.0266	6.39371	11.8081
10.2929	4.88502	5.90289	6.6846	4.91927	4.78507	5.18489	4.5768	7.20548	5.34099	6.69695	3.90897	7.06053	6.29116	8.2094	5.21515	5.89094	4.7791	11.0404	5.47878		10.5816	14.4466	12.2625	17.7419	6.88804	16.2849	6.96266	18.4679	6.77611	13.7852	8.85432	11.5476	5.8444	11.2139	6.72771	12.5509	5.62458	12.8282	4.97318	12.323		5.59704	4.17959	5.9996	10.3433	6.03343	11.0402	6.39879	11.8656
10.3077	4.8906	5.92837	6.70531	4.96985	4.77551	5.27887	4.58397	7.13898	5.32586	6.68102	3.91136	7.0442	6.28717	8.25839	5.09927	5.91802	4.78547	11.0846	5.47957		10.5776	14.367	12.1809	17.7762	6.89006	16.2919	6.96367	18.4659	6.78116	13.8023	8.87852	11.5103	5.80205	11.2139	6.70351	12.4491	5.62357	12.7163	4.9752	12.3261		5.58689	4.19143	6.00299	10.345	6.02667	11.0706	6.3971	11.8943
10.3116	4.88821	5.89851	6.7065	5.03834	4.77073	5.3625	4.59591	7.08999	5.29639	6.66987	3.90459	6.95101	6.30231	8.28547	5.06741	5.96143	4.78746	11.0878	5.47997		10.5675	14.3125	12.1678	17.8075	6.85779	16.305	6.95963	18.4599	6.79023	13.7932	8.89567	11.473	5.75465	11.2028	6.7015	12.3815	5.62659	12.6225	4.97318	12.3321		5.57166	4.19313	6.01144	10.345	6.04696	11.0807	6.39202	11.9214
10.3088	4.92963	5.85908	6.70889	5.11679	4.76396	5.38719	4.59113	7.0227	5.25219	6.69535	3.91774	6.83354	6.30987	8.30259	5.07099	6.01558	4.7556	11.0926	5.48395		10.5695	14.254	12.1698	17.7974	6.80939	16.3201	6.95257	18.4457	6.82149	13.7781	8.90071	11.4478	5.77583	11.1695	6.69343	12.321	5.61853	12.5318	4.98327	12.3684		5.55982	4.19482	6.00806	10.3467	6.17382	11.0824	6.39371	11.9129
10.3077	5.00808	5.80174	6.74234	5.20281	4.75441	5.39316	4.57043	6.94106	5.25418	6.74553	4.0161	6.7519	6.33377	8.30737	5.06263	6.03828	4.74644	11.1081	5.48595		10.5665	14.2127	12.1668	17.8085	6.82149	16.3242	6.9435	18.4276	6.83258	13.7741	8.91079	11.4569	5.85146	11.1604	6.72166	12.2252	5.58928	12.4662	4.99436	12.3815		5.55982	4.1982	5.99622	10.3483	6.24825	11.0807	6.39541	11.8487
10.3073	5.05626	5.80174	6.75588	5.29918	4.74445	5.41267	4.54494	6.86818	5.27648	6.78973	4.06508	6.68978	6.41261	8.30617	5.03356	6.02435	4.76516	11.128	5.48634		10.5544	14.1986	12.1668	17.9063	6.71561	16.3373	6.91426	18.4236	6.74586	13.7761	8.88155	11.466	5.95532	11.1614	6.73074	12.1365	5.58828	12.4279	4.99133	12.3876		5.58689	4.2185	5.98946	10.3703	6.25671	11.0689	6.3768	11.7878
10.3081	5.09449	5.86784	6.73677	5.36767	4.74047	5.4286	4.55251	6.83911	5.31232	6.80726	4.0822	6.63642	6.47235	8.3237	5.01524	6.02435	4.78427	11.132	5.48555		10.4899	14.1744	12.1486	18.0535	6.6178	16.3484	6.85376	18.4256	6.59965	13.771	8.84222	11.4811	6.03598	11.1745	6.73578	12.08	5.61752	12.3755	4.98427	12.4521		5.59704	4.2185	5.98607	10.4448	6.27869	11.0621	6.35143	11.7438
10.322	5.10723	5.91005	6.73836	5.39077	4.72454	5.43218	4.63812	6.9096	5.35055	6.79093	4.09096	6.60416	6.48509	8.36232	5.01046	6.05859	4.79741	11.1292	5.48515		10.4969	14.124	12.0528	18.2179	6.6057	16.3443	6.75292	18.4276	6.55327	13.772	8.8271	11.5144	6.02792	11.1887	6.72469	12.0014	5.68205	12.3321	4.98629	12.5156		5.59704	4.19482	5.97931	10.5378	6.33959	11.0926	6.3565	11.7235
10.3395	5.10564	5.92399	6.75071	5.39515	4.70901	5.429	4.73609	7.04659	5.36369	6.76385	4.0834	6.62367	6.4839	8.40215	5.01007	6.08488	4.82848	11.124	5.48435		10.3547	14.0715	11.8179	18.3822	6.59764	16.3393	6.57646	18.4256	6.61276	13.7458	8.78576	11.5668	5.9654	11.1887	6.70755	11.9066	5.73045	12.3351	4.98528	12.4965		5.59873	4.19651	5.96239	10.5564	6.35988	11.123	6.36327	11.7201
10.353	5.0917	5.92758	6.72442	5.39515	4.70104	5.40909	4.7779	7.18995	5.3609	6.75071	4.0834	6.69376	6.50859	8.43082	5.00967	6.09085	4.91091	11.1252	5.47918		9.92721	14.0342	11.5285	18.4831	6.57041	16.3312	6.36672	18.4246	6.66923	13.6581	8.72828	11.6132	5.88171	11.1604	6.7015	11.8602	5.68306	12.3432	4.9873	12.4531		5.65624	4.20497	5.95224	10.5513	6.31252	11.1332	6.32267	11.7201
10.3574	5.07179	5.92041	6.69058	5.39595	4.69786	5.36927	4.78547	7.32415	5.34338	6.75111	4.07026	6.75827	6.58345	8.45073	5.00887	6.09483	5.01166	11.126	5.46643		9.30203	14.012	11.3167	18.5123	6.55125	16.3191	6.22555	18.4236	6.7015	13.6248	8.71215	11.6495	5.85952	11.113	6.7025	11.836	5.64575	12.317	4.99436	12.442		5.67484	4.21681	5.94209	10.5919	6.34128	11.1399	6.26855	11.7286
10.3582	5.04352	5.92041	6.67504	5.39595	4.70383	5.36329	4.78467	7.39464	5.31192	6.75389	4.05871	6.80248	6.64478	8.48179	5.01126	6.10678	5.11002	11.1268	5.43298		8.59921	14.006	11.114	18.5678	6.55428	16.303	6.11161	18.4296	6.69242	13.6339	8.69299	11.6898	5.86154	11.108	6.70049	11.8179	5.64676	12.2656	4.99738	12.4733		5.65793	4.20666	5.93025	10.6951	6.56286	11.1399	6.22626	11.8098
10.3582	4.981	5.91125	6.685	5.39316	4.7118	5.38042	4.76874	7.4022	5.28126	6.7523	4.08499	6.81283	6.66071	8.51604	5.0248	6.11235	5.17214	11.0862	5.31989		8.13335	14.007	10.9083	18.6454	6.5815	16.2909	5.99061	18.4306	6.71662	13.6369	8.63047	11.7402	5.79902	11.113	6.69444	11.8027	5.68306	12.2262	4.99335	12.5056		5.64778	4.21342	5.90488	10.783	6.77598	11.1399	6.17552	11.9315
10.3606	4.91728	5.90408	6.69615	5.39634	4.70503	5.39435	4.7787	7.40141	5.27528	6.76026	4.12083	6.80925	6.64398	8.52281	5.02162	6.10678	5.13949	11.0372	5.18529		8.04865	14.01	10.9043	18.6555	6.65914	16.2838	5.87263	18.4316	6.88401	13.6228	8.52258	11.7876	5.74356	11.113	6.70452	11.7775	5.77986	12.2192	5.00444	12.5086		5.64947	4.2185	5.8812	10.8135	6.78613	11.1399	6.14676	11.9654
10.361	4.89817	5.91404	6.69257	5.41227	4.70343	5.40351	4.74326	7.40658	5.26891	6.7746	4.12163	6.81004	6.64478	8.5017	5.01007	6.10399	5.2267	11.0679	5.09489		8.03151	14.003	10.7067	18.6676	6.75695	16.2899	5.67701	18.4558	6.96367	13.6147	8.30175	11.8481	5.72945	11.11	6.70452	11.7533	5.92002	12.201	5.01049	12.5035		5.64778	4.19989	5.87613	10.8084	6.70494	11.1416	6.1383	11.9146
10.361	4.89617	5.95705	6.68261	5.41984	4.69786	5.40232	4.7337	7.40778	5.23865	6.79252	4.12282	6.83832	6.66031	8.47821	5.01684	6.13147	5.45369	11.0898	5.03038		7.78547	13.9334	10.0472	18.723	6.79426	16.308	5.48442	18.4952	6.96669	13.646	7.94681	11.9308	5.72642	11.1009	6.69343	11.7231	6.06018	12.1506	5.00444	12.4763		5.64609	4.19651	5.88458	10.7983	6.8115	11.1467	6.12477	11.8385
10.3598	4.89777	6.00881	6.67823	5.41586	4.68989	5.37962	4.72215	7.41017	5.22471	6.82677	4.12441	6.8638	6.65832	8.46706	5.03316	6.16333	5.61895	11.0874	4.99493		7.66144	13.8033	9.23548	18.7573	6.76099	16.3312	5.48442	18.5224	6.96266	13.6531	7.56061	11.9994	5.73449	11.0949	6.7146	11.6717	6.20539	12.0831	4.99738	12.3593		5.64609	4.22019	5.8812	10.7949	6.95697	11.1755	6.11631	11.7658
10.3598	4.90374	6.08448	6.68022	5.41665	4.6887	5.33621	4.6656	7.41654	5.22073	6.85146	4.13795	6.8415	6.65673	8.46745	5.04272	6.15815	5.74121	11.1097	4.99454		7.63624	13.6702	8.60828	18.7503	6.72065	16.3595	5.38156	18.5345	6.99089	13.5583	7.11996	12.0347	5.74457	11.0838	6.74183	11.595	6.38891	12.0135	4.99738	12.1708		5.64778	4.23203	5.86767	10.8135	6.95528	11.2668	6.13492	11.715
10.3678	4.90135	6.18284	6.69774	5.42303	4.68512	5.2944	4.65166	7.41813	5.22073	6.8642	4.14552	6.8415	6.63084	8.45989	5.114	6.1681	5.84913	11.1399	4.9125		7.41642	13.5442	8.31183	18.7039	6.70956	16.3897	5.3009	18.5355	7.03526	13.3334	6.79426	12.0538	5.74356	11.0727	6.71965	11.5174	6.51092	11.9812	4.93386	12.0165		5.63932	4.23372	5.8626	10.822	6.97896	11.3903	6.14169	11.6914
10.3793	4.89339	6.24735	6.71845	5.41825	4.69427	5.26891	4.65206	7.41057	5.22949	6.86898	4.14393	6.84469	6.59221	8.479	5.18927	6.23302	5.93674	11.1523	4.801		7.2823	13.4181	8.1152	18.6605	6.70956	16.421	5.2414	18.5355	7.0524	13.0158	6.71158	12.0538	5.73953	11.1372	6.60369	11.4609	6.51898	11.9681	4.88747	11.9126		5.61733	4.23541	5.8626	10.7695	6.97558	11.4782	6.13999	11.6829
10.4076	4.88303	6.27563	6.72164	5.41227	4.69985	5.26493	4.63852	7.41375	5.22232	6.86739	4.13995	6.8415	6.53925	8.59648	5.20121	6.34253	5.97855	11.1559	4.68312		7.2329	13.3102	7.9095	18.6787	6.70755	16.4532	5.13149	18.5315	7.05341	12.925	6.68234	12.0568	5.70424	11.2784	6.36067	11.4276	6.51898	11.955	4.85924	11.8471		5.63087	4.2371	5.86429	10.7306	6.97388	11.5273	6.10109	11.6491
10.4857	4.86471	6.28478	6.71327	5.40391	4.70463	5.28564	4.62777	7.40499	5.19883	6.89486	4.12163	6.84628	6.49266	8.85373	5.18608	6.4835	5.98612	11.1861	4.57202		7.16534	13.2386	7.81169	18.7624	6.70654	16.4835	5.00848	18.5305	7.02921	13.2749	6.67528	12.0548	5.62559	11.353	6.13178	11.3883	6.51697	11.955	4.84714	11.8431		5.71713	4.31829	5.87105	10.6849	6.96712	11.5391	6.02836	11.6237
10.641	4.85117	6.28399	6.71327	5.39037	4.74923	5.31192	4.60746	7.38787	5.18051	6.92792	4.10729	6.86301	6.4835	9.02218	5.17374	6.63881	5.98771	11.1818	4.54454		7.10383	13.2043	7.79858	18.8219	6.70956	16.4724	4.92579	18.5385	6.97577	13.8951	6.63091	12.0548	5.55097	11.3641	6.10959	11.2865	6.52705	11.9994	4.85823	11.7997		5.81185	4.44177	5.88458	10.6224	7.00771	11.5391	6.01314	11.6372
10.776	4.84241	6.29474	6.7304	5.3828	4.77551	5.33143	4.63215	7.36955	5.15422	6.96774	4.08818	6.87535	6.49106	9.03134	5.20082	6.77102	5.98572	11.1387	4.57998		7.10988	13.1993	7.77035	18.8027	6.76905	16.4502	4.89151	18.5486	6.99291	14.4527	6.56133	12.0397	5.4945	11.3691	6.12169	11.1695	6.55226	12.1194	4.85823	11.4851		5.88797	4.48575	5.90319	10.6004	7.13288	11.5408	6.01652	11.6846
10.8174	4.81135	6.31306	6.74473	5.38201	4.7548	5.3386	4.63255	7.36596	5.12157	7.06292	4.07623	6.87296	6.45642	9.019	5.20918	6.88133	5.97178	11.0631	4.60348		7.05845	13.2104	7.77035	18.7664	6.82855	16.4734	4.8905	18.5567	6.9556	14.7471	6.55932	12.0195	5.46627	11.3742	6.13178	11.1282	6.60772	12.2736	4.86226	11.112		5.93702	4.48913	5.90827	10.6021	7.40013	11.5408	6.02498	11.71
10.7847	4.78467	6.327	6.73319	5.38201	4.711	5.34139	4.63454	7.37273	5.12157	7.19433	4.11366	6.8638	6.37558	9.02656	5.21197	6.97411	5.95943	10.9384	4.60348		6.91829	13.2326	7.77942	18.7301	6.86586	16.5006	4.8905	18.5708	6.87896	14.8439	6.49377	12.0105	5.46929	11.3742	6.12774	11.111	6.67528	12.3765	4.86025	10.9093		5.99791	4.49759	5.89642	10.6257	7.93971	11.5408	6.04527	11.7066
10.7393	4.78029	6.34691	6.71805	5.3836	4.68432	5.3386	4.57839	7.36557	5.09648	7.30902	4.12481	6.85305	6.36045	9.04488	5.20798	7.02708	5.96939	10.8074	4.61065		6.87997	13.2487	7.78749	18.6585	6.87796	16.5127	4.89252	18.5849	6.81241	14.8974	6.48369	11.9984	5.45013	11.3782	6.09044	11.0939	6.7509	12.433	4.85521	10.8055		6.04358	4.54326	5.89473	10.6596	8.25432	11.5476	6.08079	11.7167
10.7222	4.77671	6.37598	6.65633	5.38679	4.65604	5.35015	4.41074	7.36119	4.94356	7.4476	4.10809	6.85265	6.35686	9.05085	5.2056	7.03106	5.99846	10.7477	4.60985		6.92132	13.2578	7.78951	18.5748	6.88804	16.5148	4.8905	18.5486	6.75998	14.9659	6.48369	11.9873	5.44307	11.346	6.04708	11.0878	6.86485	12.4572	4.85521	10.7984		6.07064	4.60246	5.89642	10.6494	8.22725	11.5679	6.10955	11.7184
10.7266	4.78387	6.35567	6.54244	5.38719	4.61662	5.36727	4.3526	7.3588	4.80697	7.65547	4.1049	6.85066	6.35208	9.04488	5.21037	7.0215	6.00244	10.7437	4.60826		6.91728	13.2618	7.79152	18.5395	6.92232	16.4966	4.92982	18.3671	6.69242	15.0557	6.4847	11.9994	5.42997	11.2411	6.02086	11.0868	6.9798	12.4723	4.85117	10.8095		6.07234	4.65997	5.89642	10.6393	8.26616	11.5747	6.14676	11.6558
10.7345	4.78467	6.29832	6.51496	5.38838	4.59113	5.42422	4.37012	7.36079	4.72812	7.85618	4.11844	6.89526	6.35686	9.04727	5.17812	7.05495	6.01081	10.7433	4.61184		6.79628	13.2588	7.78245	18.5355	6.97677	16.4543	5.03671	18.0243	6.57343	15.1242	6.49075	12.0074	5.36846	11.0848	6.02993	11.0878	7.0524	12.5136	4.82496	10.8095		6.07234	4.71748	5.90488	10.6291	8.278	11.5747	6.19243	11.5324
10.7377	4.78467	6.27085	6.5285	5.4071	4.59751	5.5644	4.40277	7.37074	4.73051	8.01587	4.13636	6.94783	6.35686	9.07515	5.15064	7.1103	6.02514	10.7453	4.62339		6.59058	13.2346	7.729	18.5577	7.01207	16.4109	5.08713	17.4233	6.44437	15.1827	6.49478	12.0064	5.33417	10.871	6.0138	11.0787	7.13206	12.5963	4.80378	10.8085		6.06557	4.77499	5.90657	10.5665	8.27462	11.5814	6.23303	11.2583
10.7361	4.7791	6.30828	6.43492	5.43816	4.61343	5.73523	4.41392	7.37871	4.73091	8.14211	4.13238	6.94504	6.36682	9.10223	5.17891	7.18716	6.03311	10.723	4.64211		6.53814	13.1872	7.67153	18.6031	7.01711	16.303	5.09721	16.5117	6.39193	15.2463	6.52201	12.0034	5.32106	10.4959	5.94523	11.0656	7.19155	12.6729	4.7937	10.7934		6.05035	4.81727	5.88628	10.4312	8.28646	11.5865	6.24825	10.986
10.6919	4.80418	6.37956	6.29036	5.43816	4.58835	5.88098	4.42507	7.39424	4.71498	8.2106	4.13517	6.91876	6.38872	9.10143	5.18887	7.25048	6.02275	10.6306	4.64091		6.53713	13.161	7.64934	18.5809	6.96165	16.1276	5.09519	15.6395	6.37681	15.2916	6.58352	12.0034	5.33417	9.95443	5.88977	11.0697	7.22281	12.7133	4.7816	10.7712		6.07572	4.83757	5.89642	10.2756	8.30844	11.5865	6.24825	10.942
10.5514	4.93042	6.40584	6.16372	5.44891	4.55012	5.98612	4.4641	7.40818	4.71498	8.22056	4.13198	6.9096	6.40505	9.09784	5.18449	7.25685	6.01519	10.5625	4.63016		6.50386	13.1741	7.64934	18.4155	6.92938	16.0116	5.06696	14.8853	6.36773	15.2947	6.59864	12.0256	5.25451	9.60454	5.82927	11.0747	7.26718	12.7284	4.78361	10.7772		6.15014	4.83419	5.9015	10.1301	8.32874	11.5899	6.24656	10.9437
10.3626	5.01684	6.42098	6.10757	5.4736	4.54136	6.04824	4.48003	7.41256	4.71538	8.19706	4.11725	6.95022	6.415	9.09784	5.1809	7.26004	6.0116	10.5661	4.66958		6.37681	13.1892	7.64934	18.2259	6.93241	15.946	5.02663	14.248	6.36672	15.2947	6.56133	12.0326	5.15065	9.53496	5.70222	11.0767	7.3176	12.7324	4.7453	10.7793		6.1992	4.84095	5.89981	10.0101	8.36088	11.5899	6.24994	10.8845
10.2081	4.99772	6.46558	6.12987	5.45767	4.54773	6.09603	4.47565	7.41216	4.73211	8.15644	4.11605	6.998	6.39748	9.10183	5.17015	7.25884	6.01718	10.5745	4.68711		6.24169	13.1842	7.64733	18.1241	6.95358	15.8765	5.00948	14.0957	6.37378	15.3017	6.55024	12.0135	5.13855	9.61563	5.56307	11.0767	7.34079	12.7294	4.66564	10.6704		6.22118	4.84941	5.89642	9.88658	8.36088	11.5899	6.24994	10.7797
10.1046	4.96626	6.51018	6.13625	5.44931	4.56525	6.10917	4.48043	7.41017	4.75003	8.10547	4.11565	6.998	6.40226	9.13488	5.17015	7.24252	6.03191	10.5585	4.66082		6.13178	13.16	7.62918	18.0414	6.99795	15.8008	5.01251	14.0322	6.38386	15.3098	6.53814	11.9328	5.14057	9.83343	5.54189	11.0545	7.37406	12.7284	4.57488	10.5625		6.22964	4.84265	5.8812	9.72589	8.62813	11.5865	6.24656	10.7103
10.0472	4.93679	6.51735	6.13664	5.46404	4.56246	6.10996	4.46569	7.41216	4.75003	8.00671	4.11964	6.9988	6.39748	9.18824	5.18728	7.19393	6.03032	10.5259	4.66361		6.0864	13.1368	7.57372	17.9738	7.05442	15.699	5.03268	13.5724	6.39597	15.3239	6.51293	11.7543	5.15368	9.94233	5.50761	11.0424	7.42247	12.7375	4.47405	10.5302		6.22626	4.89508	5.86767	9.64977	9.27765	11.5916	6.25163	10.6731
10.0496	4.95471	6.51894	6.1474	5.46046	4.56127	6.11116	4.46808	7.41654	4.75202	7.81198	4.11964	6.9988	6.36841	9.23802	5.19883	7.10632	6.03112	10.5215	4.66998		6.07531	13.1096	7.57473	17.9496	7.08265	15.577	5.05889	12.7496	6.4242	15.3461	6.5089	11.4165	5.1325	9.70739	5.39266	11.0374	7.45675	12.7526	4.41758	10.5121		6.21611	4.96443	5.86598	9.69544	9.56689	11.6017	6.28039	10.6714
10.058	5.0025	6.53646	6.15576	5.4513	4.56127	6.11116	4.48521	7.40141	4.77113	7.63596	4.11326	6.97292	6.36602	9.24638	5.2044	7.03185	6.02514	10.5402	4.67078		6.05212	13.0914	7.56061	17.9396	7.12097	15.462	5.07503	11.6838	6.43428	15.337	6.50991	10.8014	5.06898	9.37161	5.34829	11.0344	7.47087	12.7637	4.4075	10.5443		6.20258	4.9712	5.8609	9.63624	9.57196	11.6136	6.31422	10.6376
10.0604	5.00569	6.56115	6.15456	5.45966	4.56127	6.11156	4.48879	7.34446	4.78826	7.58738	4.11486	6.9327	6.34691	9.25634	5.18767	7.00517	6.02992	10.5581	4.67635		5.99968	13.0975	7.5596	17.8992	7.16937	15.3431	5.09015	10.7732	6.42622	15.3057	6.50789	10.1359	5.02965	9.01969	5.33417	11.0334	7.47792	12.7697	4.40246	10.5514		6.1789	4.97289	5.82708	9.4654	9.55674	11.6389	6.34128	10.5395
10.0898	4.93719	6.56513	6.16054	5.45687	4.55728	6.11156	4.50432	7.2688	4.78746	7.59813	4.14273	6.90801	6.33576	9.29457	5.20082	7.01473	6.02992	10.5534	4.70025		5.97548	13.0833	7.54548	17.8165	7.20063	15.2674	5.08813	10.1501	6.44537	15.2987	6.51092	9.8778	5.00646	8.70105	5.2888	11.0354	7.4749	12.7718	4.39943	10.5473		6.1383	4.97458	5.77802	9.27088	9.55505	11.6643	6.35312	10.4549
10.1527	4.96029	6.55438	6.15855	5.49949	4.5533	6.11355	4.45972	7.21504	4.77233	7.59455	4.16464	6.89925	6.34332	9.30691	5.20838	6.98685	6.02873	10.5438	4.75719		5.96237	13.0602	7.53943	17.6683	7.2329	15.2553	5.08309	9.69125	6.49176	15.2987	6.50789	9.88082	4.98528	8.54173	5.2283	11.0334	7.47187	12.7778	4.39943	10.5998		6.09433	4.97965	5.77464	9.15587	9.55167	11.6947	6.34297	10.4397
10.2184	5.01246	6.54682	6.15616	5.59068	4.55569	6.12111	4.42229	7.15809	4.73051	7.58021	4.17499	6.93031	6.36762	9.28541	5.20998	6.96137	6.02116	10.5442	4.80538		5.93817	13.2265	7.51221	17.4787	7.2581	15.2372	5.10124	9.42908	6.51092	15.3017	6.47966	9.84452	5.00041	8.49837	5.19401	11.0334	7.47389	12.7859	4.40447	10.7641		6.06557	5.0304	5.78479	9.12035	9.55167	11.7252	6.32775	10.4363
10.2587	5.01246	6.54642	6.15377	5.69422	4.57043	6.13147	4.42069	7.09238	4.68989	7.53919	4.18176	6.97531	6.37717	9.22129	5.21396	6.95739	6.02076	10.5434	4.84441		5.92708	13.6147	7.46482	17.3456	7.26415	15.1484	5.10225	9.35749	6.53209	15.3017	6.38991	9.71848	4.99738	8.6466	5.16074	11.0374	7.46582	12.7899	4.40044	10.9073		6.05204	5.14034	5.75942	9.08482	9.55505	11.7438	6.30914	10.4481
10.2642	5.03157	6.55478	6.14501	5.82722	4.64091	6.13505	4.40795	7.04818	4.68671	7.47587	4.17738	6.97371	6.36961	9.1524	5.25099	6.95699	6.02036	10.5438	4.88542		5.93414	13.9445	7.4507	17.2801	7.2571	15.0194	5.12141	9.38673	6.55327	15.3057	6.28807	9.53597	4.99839	8.88962	5.14158	11.0404	7.44566	12.7909	4.4196	11.0707		6.04527	5.28581	5.75265	9.07468	9.55843	11.7556	6.27869	10.3077
10.2344	5.05069	6.56713	6.11793	5.91483	4.72852	6.12908	4.35698	7.05774	4.69467	7.4484	4.17061	6.94424	6.36323	9.12214	5.29559	6.95579	5.99328	10.5131	4.90653		5.93918	14.0947	7.45272	17.2166	7.15324	14.8873	5.13855	9.40387	6.58049	15.3078	6.24673	9.26069	4.98831	9.30808	5.17687	11.0404	7.43658	12.7909	4.43977	11.236		6.05542	5.42958	5.75434	9.09497	9.56351	11.7573	6.25671	10.1183
10.2161	5.06781	6.6181	6.10519	5.94908	4.7775	6.1235	4.34304	7.10752	4.69348	7.4484	4.18176	6.92752	6.3481	9.11099	5.27051	6.96615	5.82045	10.4072	4.90613		5.94927	14.1956	7.45776	17.1712	6.97879	14.7622	5.15368	9.39782	6.59764	15.3118	6.23463	8.90676	4.9631	9.83242	5.24947	11.0364	7.44062	12.7929	4.43977	11.3359		6.06557	5.47694	5.74758	9.04592	9.57366	11.7573	6.22288	10.0777
10.2121	5.05108	6.74513	6.1016	5.97895	4.81215	6.12549	4.3526	7.13659	4.69786	7.44999	4.18853	6.94863	6.31226	9.09386	5.23307	6.9534	5.73603	10.3184	4.92405		5.8565	14.25	7.45473	17.1601	6.8588	14.6806	5.15267	9.38371	6.56133	15.3098	6.23261	8.64459	4.97217	10.1319	5.33216	11.0465	7.43557	12.7929	4.49018	11.4024		6.0402	5.47694	5.70529	8.90553	9.6041	11.7573	6.18228	10.098
10.2133	5.00091	6.87973	6.10718	5.97656	4.81772	6.15138	4.34862	7.14694	4.69587	7.448	4.18853	7.05097	6.29912	9.15718	5.2275	6.91876	5.79338	10.3124	4.96905		5.64273	14.2319	7.43457	17.145	6.81947	14.608	5.15267	9.37564	6.42722	15.3057	6.22959	8.51451	4.98327	10.2327	5.39266	11.0505	7.43658	12.7919	4.59404	11.4357		5.9996	5.47694	5.64778	8.9106	9.67684	11.7523	6.18566	10.0828
10.2236	5.04153	6.9761	6.11594	5.95864	4.8221	6.22186	4.351	7.12743	4.68989	7.44641	4.19132	7.25327	6.31147	9.25873	5.24621	6.89248	5.8109	10.3009	4.98896		5.5429	14.3599	7.3902	17.1067	6.80939	14.5243	5.15872	9.37463	6.25379	15.3057	6.22354	8.42981	4.96713	10.27	5.41383	11.0505	7.43759	12.7919	4.61421	11.4196		5.96577	5.47356	5.62748	8.96473	9.71236	11.7489	6.20427	10.0676
10.2471	5.11679	7.04261	6.14979	5.9666	4.81215	6.3027	4.35578	7.03862	4.68711	7.4476	4.19132	7.45676	6.31704	9.35868	5.21834	6.88531	5.79815	10.2407	4.98936		5.53383	14.5364	7.38516	17.0835	6.80939	14.4607	5.15569	9.37665	6.18925	15.3108	6.22051	8.38342	4.96713	10.2731	5.39971	11.0566	7.43759	12.7889	4.61623	11.4105		5.94379	5.48371	5.60549	9.00194	9.70221	11.7506	6.22288	10.1285
10.2535	5.1156	7.05097	6.2374	5.96859	4.77949	6.39549	4.36176	6.91318	4.6879	7.448	4.18295	7.57424	6.32062	9.38258	5.19763	6.88013	5.77107	10.1607	5.00569		5.53988	14.6533	7.35995	17.0875	6.8104	14.4053	5.15569	9.37665	6.2679	15.3168	6.21043	8.37636	4.99537	10.2741	5.35232	11.0576	7.4386	12.7818	4.61824	11.4186		5.92349	5.51246	5.59535	9.02901	9.71236	11.7269	6.22118	10.0828
10.2423	5.114	7.03902	6.27005	5.97497	4.76755	6.49863	4.35817	6.84787	4.72056	7.43884	4.15428	7.63716	6.31784	9.27466	5.23865	6.87933	5.79497	10.1054	5.02679		5.53786	14.7401	7.27222	17.0855	6.80334	14.367	5.1567	9.37261	6.34151	15.3289	6.2185	8.35116	5.03973	10.2892	5.31703	11.0525	7.45574	12.7748	4.61623	11.4155		5.88797	5.50232	5.60211	9.05776	9.68698	11.6102	6.2381	10.0608
10.2105	5.11241	7.02548	6.27085	6.01359	4.76516	6.58903	4.35459	6.84031	4.7791	7.4476	4.04796	7.69609	6.28319	9.09267	5.24422	6.89128	5.88178	10.0695	5.06462		5.50055	14.7461	7.1734	17.0855	6.77006	14.3488	5.16275	9.38371	6.36471	15.3531	6.2074	8.31486	5.08914	10.3205	5.31905	11.0414	7.46784	12.7647	4.61119	11.3883		5.84061	5.47694	5.46849	9.05776	9.69713	11.3514	6.19581	10.0608
10.136	5.09608	7.00597	6.27443	6.07373	4.79343	6.67783	4.37131	6.84787	4.79184	7.47468	3.96512	7.76499	6.27244	8.88002	5.24462	6.87575	5.90129	10.06	5.06661		5.50862	14.6594	7.14719	17.1087	6.74788	14.3004	5.16376	9.38068	6.35765	15.3592	6.13178	8.47619	5.14964	10.3709	5.18393	11.0384	7.47591	12.7506	4.58194	11.346		5.80339	5.45834	5.24183	8.82434	9.70221	10.9996	6.08418	10.0151
10.005	5.08055	7.00358	6.27801	6.14501	4.80856	6.7742	4.40954	6.85664	4.76755	7.47986	4.07623	7.81198	6.24576	8.64546	5.25736	6.83115	5.85868	10.0819	5.00131		5.52072	14.5323	7.11996	17.145	6.74687	14.1966	5.16275	9.41799	6.34454	15.3541	6.05313	8.78071	5.20107	10.4031	4.96512	11.0384	7.48599	12.7385	4.53052	11.2895		5.76111	5.45495	5.19785	8.38118	9.69713	10.7222	5.96577	9.89503
9.8712	5.07338	7.00278	6.27722	6.19678	4.801	6.83911	4.42308	6.86739	4.75879	7.48503	4.34583	7.82711	6.1681	8.41768	5.27289	6.78456	5.85152	10.0886	4.94954		5.46526	14.3972	6.99392	17.1339	6.74889	14.127	5.16779	9.59647	6.34656	15.3501	6.09951	9.05902	5.19099	10.3931	4.89252	11.0424	7.52532	12.7274	4.50632	11.1957		5.7239	5.48033	5.19785	8.28307	9.69882	10.5835	5.86767	9.77494
9.76328	5.06263	7.00557	6.27045	6.22425	4.79662	6.8642	4.38047	6.89447	4.74963	7.51092	4.63335	7.83428	6.08886	8.24365	5.28006	6.73398	5.85152	10.0787	4.92445		5.41887	14.3276	6.91022	17.032	6.75494	14.0836	5.17082	9.77394	6.35462	15.3491	6.2427	9.31514	5.17889	10.3931	4.90966	11.0505	7.61204	12.7092	4.49623	11.0596		5.71713	5.49386	5.18432	8.26278	9.70559	10.5276	5.77633	9.70728
9.68682	5.05467	7.00955	6.23262	6.26209	4.79901	6.8642	4.30879	6.92672	4.66162	7.54397	4.83365	7.84423	6.01877	8.15365	5.33343	6.71208	5.86466	10.0958	4.92047		5.41887	14.3176	6.79628	16.905	6.77107	14.0372	5.16679	9.8294	6.36874	15.3501	6.32336	9.47748	5.17183	10.502	4.91268	11.0636	7.71892	12.6901	4.48817	10.9537		5.72051	5.48878	5.16741	8.13761	9.73096	10.4989	5.67992	9.69206
9.66611	5.04511	7.00836	6.2135	6.31346	4.81414	6.86779	4.34145	6.93548	4.55131	7.56946	4.90892	7.83985	5.99528	8.11503	5.32188	6.71527	5.87859	10.0811	4.91728		5.46223	14.2772	6.65007	16.8515	6.78519	14.012	5.15872	9.82536	6.3516	15.3562	6.34151	9.49059	5.14964	10.6331	4.89252	11.0777	7.78345	12.681	4.48917	10.9275		5.71713	5.50062	5.08622	8.04458	9.7817	10.4972	5.59196	9.70559
9.68164	5.04352	7.00836	6.25771	6.34332	4.8221	6.87017	4.4418	6.92393	4.49914	7.57742	4.90653	7.85459	5.99528	8.07481	5.29918	6.74673	5.84355	10.0707	4.93401		5.5429	14.1895	6.69242	16.8485	6.78519	13.9949	5.13956	9.91612	6.33345	15.3743	6.34051	9.46942	5.23031	10.6472	4.88344	11.0828	7.80866	12.676	4.48413	10.9436		5.70867	5.50739	4.9898	7.99214	9.81892	10.5023	5.58012	9.73773
9.69518	5.04352	6.99681	6.28996	6.35646	4.80936	6.87177	4.49556	6.93668	4.49914	7.57463	4.98299	7.87171	6.00523	8.04374	5.30913	6.7969	5.79696	10.091	4.94755		5.53887	14.1129	6.48974	16.8485	6.76502	13.9646	5.09822	10.2882	6.31429	15.3894	6.34151	9.45732	5.41484	10.6159	4.88344	11.0777	7.84597	12.6689	4.47506	10.9598		5.69345	5.50739	4.98135	7.93125	9.82568	10.5073	5.5446	9.79862
9.69399	5.04591	6.98606	6.24018	6.36005	4.79622	6.89208	4.50074	7.00358	4.51906	7.57941	5.12953	7.87251	6.04625	8.10188	5.31789	6.7977	5.79218	10.1085	4.9587		5.49853	14.0675	6.20942	16.8505	6.72973	13.9233	5.05688	10.6996	6.26286	15.3925	6.33446	9.46942	5.54693	10.5675	4.88344	11.0697	7.91152	12.6528	4.45892	10.9668		5.66977	5.52261	4.96781	7.93463	9.77663	10.4059	5.50232	9.85275
9.69439	5.01285	6.97969	6.14222	6.35646	4.79622	6.96535	4.49317	7.12145	4.52184	7.55313	5.25497	7.86892	6.0793	8.20064	5.31909	6.76783	5.79497	10.1077	4.96586		5.48946	14.0433	6.11867	16.8636	6.7146	13.8769	5.03167	10.983	6.19329	15.3955	6.31328	9.53899	5.59332	10.5221	4.87033	11.0646	7.97	12.6366	4.41254	10.9587		5.64947	5.53445	4.94583	7.9803	9.69375	10.3077	5.50232	9.89503
9.68284	4.97104	6.97889	6.13067	6.35527	4.81255	7.08681	4.49437	7.21145	4.48799	7.5161	5.3382	7.86932	6.08368	8.24485	5.2948	6.74394	5.81687	10.095	4.96746		5.48845	14.0171	6.10859	16.8828	6.7267	13.8013	5.00142	11.1897	6.14993	15.4025	6.35361	9.67109	5.62458	10.5413	4.85117	11.0455	8.04159	12.6094	4.39036	10.9164		5.63425	5.53953	4.93737	7.99383	9.62609	10.3213	5.49724	9.90011
9.67009	4.95113	6.98526	6.13067	6.35328	4.81414	7.25566	4.50671	7.23057	4.44419	7.51211	5.34696	7.86892	6.07094	8.23967	5.27329	6.72044	5.8328	10.0687	4.96985		5.42492	13.9949	6.11564	16.8959	6.7388	13.7317	4.99638	11.2764	6.07632	15.3985	6.42218	9.80016	5.64777	10.5957	4.8542	11.0243	8.13234	12.561	4.39439	10.8377		5.63932	5.54798	4.94413	8.01075	9.58042	10.235	5.44142	9.88488
9.6689	4.90374	6.99601	6.13505	6.34611	4.8221	7.41534	4.51029	7.23216	4.4637	7.52804	5.3617	7.86892	6.04465	8.23529	5.27289	6.70451	5.83758	10.0412	4.96746		5.33518	14.0362	6.10354	16.8979	6.70049	13.7045	4.99839	11.2784	5.96137	15.3824	6.45142	9.79915	5.64575	10.6613	4.86226	11.0132	8.19486	12.5076	4.38733	10.7672		5.67654	5.5649	4.9509	8.0209	9.56182	9.93563	5.41098	9.87981
9.70076	4.88622	6.99721	6.12709	6.34293	4.86153	7.52127	4.50671	7.23336	4.46729	7.5368	5.39037	7.87211	5.99089	8.25759	5.28365	6.70292	5.85948	9.94089	4.97024		5.31401	14.1845	6.10758	16.8969	6.66822	13.6763	4.9994	11.2663	5.89683	15.3652	6.46151	9.85864	5.64474	10.6764	4.87033	10.9981	8.22209	12.4652	4.42162	10.7399		5.67484	5.55982	4.94921	8.02259	9.55843	9.15587	5.40759	9.87812
9.73381	4.88423	6.99283	6.1243	6.3489	4.8679	7.58778	4.50472	7.2676	4.46251	7.538	5.41108	7.8749	5.92877	8.33365	5.29081	6.71566	5.88815	9.84213	4.98657		5.27972	14.4063	6.10959	16.8969	6.66923	13.6521	4.99638	11.2592	5.89381	15.3531	6.46453	9.98872	5.64777	10.6905	4.88142	10.9739	8.2473	12.4158	4.47405	10.6845		5.66977	5.59365	4.94921	8.02428	9.61594	8.01921	5.40928	9.88319
9.73779	4.88861	6.97809	6.11554	6.3481	4.81374	7.62083	4.50352	7.31858	4.46131	7.5372	5.47838	7.81556	5.92479	8.41011	5.28444	6.75071	5.9005	9.84014	5.02799		5.2293	14.612	6.10354	16.8899	6.66923	13.649	4.99638	11.2431	5.91902	15.3501	6.45848	10.0936	5.64172	10.7349	4.91672	10.9497	8.27553	12.3624	4.47203	10.6028		5.65455	5.65116	4.94583	8.0209	9.83414	7.17855	5.44988	9.88827
9.72664	4.90334	6.96376	6.11275	6.35009	4.7564	7.63118	4.49954	7.31858	4.49118	7.52764	5.56878	7.71999	5.94271	8.45551	5.29042	6.80287	5.91921	9.89071	5.05984		5.22628	14.7824	6.11464	16.8899	6.66217	13.644	4.99738	11.2008	5.92204	15.3582	6.44638	10.2559	5.60542	10.7662	4.94293	10.9255	8.28561	12.313	4.46901	10.5524		5.60888	5.70867	4.94752	8.00737	10.098	6.88424	5.51585	9.8815
9.67328	4.91011	7.00557	6.14421	6.34452	4.70901	7.63755	4.46649	7.32097	4.52583	7.48264	5.61099	7.63516	5.95784	8.48139	5.2952	6.84509	5.95824	9.90783	5.07179		5.1446	15.0012	6.13783	16.8919	6.67124	13.6319	5.00243	11.1614	5.89986	15.341	6.43932	10.391	5.54996	10.7772	4.951	10.9114	8.28763	12.2636	4.4801	10.5231		5.52092	5.74419	4.9103	7.96339	10.2756	6.89269	5.57505	9.8815
9.59204	4.88263	7.21703	6.1689	6.33576	4.67715	7.64353	4.43264	7.35561	4.52065	7.40619	5.61378	7.57185	5.95943	8.46307	5.26493	6.86261	5.96262	9.90544	5.07856		5.11435	15.1363	6.13178	16.8919	6.66116	13.6319	4.98932	11.1382	5.90692	15.3259	6.43529	10.3941	5.51668	10.7692	4.95503	10.9103	8.29771	12.2202	4.50833	10.5121		5.4262	5.75096	4.83588	7.9414	10.367	6.93329	5.61733	9.85106
9.54027	4.84042	7.53521	6.17288	6.33177	4.67835	7.64831	4.42627	7.39942	4.52662	7.33769	5.61218	7.5376	5.95466	8.44436	5.27887	6.86181	5.97457	9.88832	5.07896		5.10225	15.0224	6.1106	16.8868	6.64704	13.6339	4.92882	11.1261	5.91397	15.341	6.37882	10.382	5.52878	10.7682	4.95705	10.9083	8.32998	12.1859	4.50632	10.5191		5.34332	5.72728	4.79867	7.97861	10.4177	6.97388	5.61733	9.81046
9.557	4.83445	7.81357	6.17726	6.34293	4.66242	7.66105	4.43344	7.44402	4.52662	7.29747	5.64643	7.53043	5.97019	8.46467	5.27369	6.87217	6.00842	9.85208	5.07737		5.08007	14.9216	6.06724	16.8828	6.65814	13.6349	4.8421	11.1231	5.91498	15.3662	6.32437	10.384	5.56004	10.7732	4.96512	10.8861	8.37838	12.1355	4.48312	10.506		5.30611	5.7831	4.7919	8.13422	10.4448	6.98911	5.59365	9.802
9.63545	4.83604	7.98281	6.18602	6.34969	4.6218	7.68534	4.44459	7.44999	4.53498	7.28592	5.64723	7.53083	6.0351	8.50091	5.30435	6.89248	5.99408	9.82899	5.07976		5.07906	14.9942	6.01884	16.8828	6.66116	13.647	4.84512	11.0979	5.91397	15.3804	6.30118	10.384	5.58525	10.7742	4.97722	10.869	8.44292	12.0821	4.44884	10.4798		5.31795	5.89304	4.79867	8.26278	10.4634	6.97219	5.55982	9.79693
9.69837	4.83126	8.0529	6.14421	6.34173	4.57839	7.72954	4.45614	7.42211	4.57959	7.28751	5.66316	7.56468	6.07771	8.52082	5.36807	6.89845	5.98651	9.84571	5.11082		5.05788	15.1706	6.02187	16.8778	6.63797	13.6228	4.89857	11.0314	5.91599	15.3915	6.28303	10.391	5.60139	10.749	4.9631	10.8751	8.49938	12.0447	4.40952	10.4636		5.32133	5.83722	4.82742	8.26278	10.4617	6.86901	5.53614	9.75972
9.72863	4.82649	8.07441	6.04864	6.33815	4.56087	7.79047	4.45892	7.40619	4.60507	7.28274	5.654	7.57981	6.0801	8.53436	5.35812	6.89646	6.02395	9.92655	5.16737		4.99133	15.3078	6.0138	16.8667	6.63494	13.5774	4.97419	10.9557	5.92607	15.3985	6.28606	10.4122	5.59836	10.7541	4.95201	10.9003	8.53669	12.0064	4.39036	10.4092		5.32133	5.76957	4.89846	8.26785	10.4786	6.71171	5.54122	9.75126
9.74655	4.81932	8.10666	5.9897	6.33934	4.59352	7.82193	4.45972	7.40619	4.59074	7.26322	5.65201	7.57105	6.08089	8.53794	5.38918	6.89447	6.05899	10.0799	5.21595		4.90462	15.2735	6.01481	16.8576	6.63797	13.5936	5.01957	10.9245	5.92103	15.3965	6.29715	10.4445	5.58424	10.7793	4.93789	10.9114	8.56493	11.9732	4.35708	10.3033		5.32471	5.75096	4.97458	8.32198	10.7222	6.58823	5.55306	9.75803
9.74496	4.81494	8.15166	5.97536	6.33854	4.59591	7.82552	4.46131	7.40658	4.58357	7.27318	5.65081	7.55871	6.08965	8.54232	5.39993	6.8869	6.10558	10.2264	5.25736		4.83706	15.1989	6.01078	16.8536	6.63595	13.6198	5.05587	10.8982	5.91498	15.3925	6.3032	10.4717	5.57416	10.7601	4.92176	10.9144	8.57602	11.9611	4.26734	10.2297		5.30272	5.74927	5.02194	8.41331	11.0165	6.45461	5.56152	9.79016
9.7358	4.81812	8.19626	5.98213	6.3481	4.59392	7.82671	4.44499	7.42172	4.58038	7.29787	5.66594	7.53641	6.08726	8.56303	5.39236	6.8646	6.14063	10.3132	5.26374		4.73219	15.0285	6.01078	16.8556	6.64805	13.6279	5.13452	10.8468	5.917	15.3864	6.30824	10.4828	5.57517	10.7369	4.92377	10.9164	8.57501	11.9621	4.19373	10.1914		5.27228	5.7425	5.02532	8.50465	11.0977	6.31083	5.55813	9.78678
9.73142	4.81095	8.21219	5.98691	6.38554	4.58476	7.84423	4.40676	7.43048	4.57839	7.29866	5.68466	7.46114	6.07811	8.61719	5.38599	6.85544	6.13306	10.3538	5.27051		4.60009	14.6271	5.99666	16.8647	6.65713	13.6289	5.23939	10.7944	5.92507	15.3794	6.31126	10.4798	5.58122	10.7046	4.90966	10.8952	8.53972	11.9621	4.18566	10.1823		5.32809	5.72728	5.02194	8.55878	11.1196	6.1975	5.54122	9.71066
9.72107	4.78826	8.21219	5.98253	6.44288	4.57321	7.85698	4.4422	7.44959	4.57839	7.29946	5.69422	7.34804	6.07572	8.71396	5.38599	6.86818	6.10041	10.3455	5.28524		4.61421	14.2228	5.94624	16.8768	6.64301	13.6299	5.32006	10.7551	5.92204	15.3915	6.30521	10.4969	5.51568	10.6331	4.9389	10.8458	8.48325	11.9611	4.17659	10.2005		5.39406	5.67315	5.02363	8.62475	11.1332	6.12815	5.5243	9.59395
9.72346	4.78826	8.22454	5.96382	6.48509	4.56445	7.85976	4.53618	7.48981	4.58436	7.3122	5.70497	7.2461	6.06337	8.76015	5.40073	6.85942	6.1028	10.3057	5.28843		4.54766	13.9979	5.8565	16.8858	6.63898	13.6289	5.42089	10.7319	5.94624	15.4217	6.25984	10.5332	5.43299	10.508	4.9873	10.8751	8.45401	11.9631	4.17961	10.2146		5.46341	5.59535	5.02702	8.66703	11.1399	6.10278	5.51415	9.55167
9.74496	4.78547	8.29224	5.95705	6.48509	4.56445	7.85459	4.6433	7.5161	4.70742	7.32535	5.67709	7.14893	6.03749	8.76334	5.4278	6.78217	6.10001	10.2718	5.28882		4.52245	13.8618	5.74659	16.8878	6.64906	13.6571	5.51164	10.7218	6.05817	15.4378	6.20841	10.5383	5.38459	10.4294	4.94596	10.9991	8.42275	11.9792	4.17558	10.1944		5.57336	5.51754	5.01856	8.66365	11.1315	6.09263	5.58181	9.63624
9.76368	4.79303	8.41927	5.99368	6.42854	4.56485	7.851	4.79224	7.52207	4.85356	7.34207	5.65957	7.07845	6.02753	8.75418	5.43577	6.68779	6.06775	10.2682	5.28803		4.50128	13.7872	5.70928	16.8959	6.64906	13.6702	5.53786	10.6825	6.28908	15.4409	6.1953	10.5272	5.37249	10.4203	4.90663	11.0435	8.4167	12.0044	4.17558	10.147		5.62579	5.45495	5.00333	8.64674	11.1044	6.04358	5.75096	9.71912
9.79992	4.82529	8.48816	6.0112	6.35368	4.54534	7.8522	4.86392	7.52924	4.86989	7.37672	5.66873	7.0434	5.99846	8.75896	5.43577	6.6619	6.04027	10.2726	5.27528		4.43573	13.7902	5.69617	16.901	6.64906	13.6329	5.555	10.6078	6.56133	15.4459	6.20236	10.5423	5.36039	10.4556	4.89252	11.0334	8.45098	12.0095	4.12415	10.0845		5.62241	5.41436	4.98642	8.66196	11.0706	5.99622	5.87951	9.73265
9.8262	4.80856	8.49254	6.0124	6.33377	4.55808	7.86056	4.8683	7.50574	4.87746	7.44999	5.70855	7.02429	5.97058	8.7948	5.43298	6.6623	6.03709	10.2061	5.23427		4.39338	13.8235	5.57214	16.8979	6.66318	13.5956	5.60744	10.5201	6.74687	15.4479	6.18724	10.5675	5.2888	10.5473	4.88445	10.992	8.51552	12.0125	4.05962	10.0119		5.6241	5.42282	4.98642	8.87339	11.0486	5.98269	5.91165	9.72081
9.82859	4.81852	8.49254	6.00722	6.31465	4.57082	7.88366	4.9583	7.4472	4.89856	7.53123	5.76072	7.01075	5.98572	8.84099	5.4298	6.6392	6.04346	10.1109	5.17294		4.39237	13.8598	5.30493	16.8979	6.68234	13.5744	5.62256	10.4112	6.85376	15.4459	6.16606	10.5998	5.24342	10.6149	4.88243	10.9305	8.61333	12.0306	4.02433	9.93729		5.68838	5.61226	4.98135	9.22691	11.0588	5.98269	5.92349	9.70559
9.8258	4.89617	8.49493	6.01638	6.27801	4.57043	7.91512	4.99892	7.42251	4.89498	7.56428	5.75992	7.01194	5.98333	8.84935	5.4298	6.64637	6.06895	10.0444	5.07816		4.41052	13.887	5.05688	16.8939	6.67931	13.5573	5.56811	10.2963	6.90922	15.4449	6.18925	10.6593	5.23939	10.6532	4.87739	10.9134	8.72626	12.0508	4.02836	9.85561		5.81523	5.85414	4.98304	9.67345	11.0757	5.97592	5.95563	9.70051
9.82819	4.94874	8.50568	6.06616	6.26726	4.58078	7.92189	4.99852	7.41972	4.91967	7.56906	5.75793	7.01951	6.00244	8.84617	5.4298	6.66111	6.09443	10.0046	4.94117		4.41557	13.8961	4.8663	16.8798	6.62889	13.5472	5.55803	10.2337	6.95157	15.4399	6.22858	10.7399	5.24745	10.7057	4.8663	10.9214	8.81298	12.0609	4.02231	9.78503		5.83384	5.8423	5.02363	10.1555	11.096	5.98946	5.98607	9.69544
9.80111	4.981	8.50608	6.16532	6.26647	4.5752	7.89441	5.00051	7.42092	4.92604	7.56428	5.75753	7.02708	6.00284	8.84537	5.43099	6.6631	6.09324	10.0237	4.83923		4.42162	13.8951	4.77252	16.8556	6.58755	13.5613	5.58021	10.2196	6.98081	15.4378	6.24673	10.8277	5.24745	10.7662	4.85924	10.9618	8.8513	12.0659	4.02735	9.75175		5.83553	5.85752	5.06254	10.4684	11.167	6.03851	5.98269	9.67853
9.68841	4.98697	8.51046	6.21589	6.27483	4.59392	7.86454	5.00768	7.41773	4.91887	7.56786	5.7655	7.03504	6.03589	8.8155	5.42542	6.6627	6.0801	10.099	4.79702		4.44582	13.8436	4.75135	16.8223	6.5452	13.5714	5.56307	10.2156	7.00501	15.4328	6.20841	10.866	5.24645	10.8156	4.84815	11.0102	8.8634	12.071	4.0092	9.73159		5.81354	5.93364	5.06761	10.5919	11.2059	6.0588	6.03682	9.65992
9.58209	5.01723	8.50489	6.22107	6.31505	4.6218	7.83149	5.00529	7.41853	4.9348	7.5822	5.76829	7.04778	6.14341	8.75457	5.38918	6.66509	6.08846	10.142	4.79941		4.46497	13.765	4.75941	16.8263	6.50285	13.6006	5.66794	10.2116	7.02013	15.4146	6.18824	10.8619	5.24745	10.8307	4.84916	11.0374	8.84726	12.0831	4.02735	9.71646		5.77126	6.10955	5.06423	10.6122	11.1738	6.0588	6.19243	9.6447
9.52076	5.32068	8.49573	6.35288	6.36443	4.63972	7.78609	4.99852	7.41773	4.95471	7.57663	5.77068	7.06929	6.26766	8.67971	5.31312	6.67146	6.11753	10.1336	4.86989		4.45691	13.6934	4.83403	16.8001	6.48268	13.7005	5.76877	10.1944	7.03223	15.3965	6.21749	10.8478	5.26359	10.8297	4.85722	11.0263	8.8271	12.0952	4.04953	9.71747		5.75603	6.44277	5.08622	10.5581	11.1738	6.0605	6.26855	9.63455
9.49886	5.58948	8.44874	6.46558	6.39708	4.63852	7.7622	4.99454	7.41256	4.94874	7.56627	5.79138	7.10553	6.38514	8.61998	5.2709	6.67146	6.13824	10.1308	4.88144		4.47203	13.5916	4.98327	16.7547	6.46151	13.8114	5.80507	10.1632	7.0645	15.3854	6.28101	10.869	5.28678	10.8297	4.85319	10.983	8.8271	12.1083	4.04953	9.72856		5.76449	6.83688	5.12681	10.5141	11.1738	6.06388	6.28039	9.62778
9.50125	5.5847	8.38462	6.47633	6.41899	4.64251	7.7622	4.99254	7.43326	4.93878	7.55512	5.79258	7.16008	6.46916	8.58334	5.32745	6.67066	6.15417	10.1336	4.846		4.48111	13.5421	5.12444	16.7648	6.44033	13.8457	5.83532	10.1289	7.09374	15.3703	6.32941	10.8791	5.30191	10.8216	4.85621	10.9406	8.82811	12.1315	4.05155	9.72453		5.7831	7.22929	5.16064	10.4938	11.1755	6.06388	6.28039	9.58888
9.48452	5.65917	8.35834	6.4385	6.42735	4.64728	7.75463	5.02122	7.51809	4.94476	7.53083	5.79497	7.20349	6.47792	8.56223	5.35294	6.6846	6.08567	10.1703	4.77989		4.47506	13.5482	5.13855	16.8052	6.42521	13.8487	5.84641	10.0553	7.10484	15.3541	6.40101	10.8377	5.30191	10.8035	4.85621	10.9134	8.81601	12.1607	4.06163	9.6973		5.78986	7.45088	5.18601	10.5006	11.1772	6.06388	6.28039	9.57873
9.43395	5.74081	8.35635	6.44726	6.415	4.64728	7.73631	5.0483	7.68773	4.94635	7.49738	5.79656	7.22619	6.48868	8.55586	5.36887	6.69655	6.17448	10.2396	4.67237		4.47607	13.5805	5.14259	16.8314	6.4	13.8497	5.85045	9.95847	7.11895	15.342	6.46957	10.8166	5.29888	10.8004	4.85823	10.8811	8.81601	12.196	4.04953	9.66605		5.75265	7.49316	5.18601	10.5632	11.1738	6.06895	6.28039	9.61256
9.36904	5.77068	8.36511	6.37677	6.40704	4.65166	7.69609	5.04312	7.8287	4.92246	7.46034	5.79975	7.25844	6.51058	8.5463	5.39993	6.66827	6.29633	10.2857	4.61503		4.47304	13.6349	5.17788	16.8485	6.38084	13.8527	5.85851	9.90099	7.15223	15.341	6.47764	10.8014	5.29686	10.8105	4.85924	10.8801	8.83416	12.2545	3.99408	9.65294		5.71544	7.50331	5.15726	10.7052	11.1721	6.07403	6.28208	9.64301
9.31448	5.77107	8.35595	6.22625	6.40346	4.67635	7.61724	5.03675	7.88963	4.92365	7.45079	5.82961	7.29906	6.51337	8.5244	5.41267	6.62606	6.29673	10.267	4.62737		4.45691	13.6813	5.20813	16.8566	6.39193	13.8547	5.89481	9.86469	7.18651	15.334	6.42722	10.7873	5.29888	10.8367	4.86226	10.9174	8.79281	12.3009	3.94164	9.65798		5.68499	7.50331	5.15557	10.8913	11.1636	6.07403	6.36496	9.62778
9.28939	5.77107	8.33724	6.16014	6.39111	4.80259	7.47866	5.02241	7.89082	4.98617	7.45875	5.9005	7.33172	6.49744	8.51245	5.39834	6.59859	6.29793	10.2188	4.66799		4.44985	13.7196	5.23636	16.6337	6.37882	13.8578	5.95431	9.84251	7.22685	15.3088	6.34958	10.752	5.313	10.8771	4.86428	10.9396	8.60223	12.3251	3.91038	9.661		5.64778	7.49147	5.14711	11.2025	11.1518	6.06895	6.46306	9.59057
9.28581	5.79815	8.32449	6.1458	6.39469	4.98219	7.35362	5.01883	7.85379	5.01883	7.46313	5.9885	7.35561	6.48549	8.51644	5.38559	6.60575	6.30031	10.2117	4.6875		4.47405	13.7599	5.26157	16.2294	6.35866	13.8416	5.99565	9.8415	7.25911	15.2634	6.25782	10.8014	5.33417	10.9033	4.86529	10.9587	8.39653	12.3513	3.87307	9.67008		5.61395	7.48809	5.09975	11.6558	11.1501	6.07234	6.46645	9.56351
9.27864	5.80532	8.31693	6.14381	6.40823	5.00847	7.24052	5.01246	7.82751	5.02122	7.45437	6.04943	7.36796	6.48031	8.50728	5.36966	6.63124	6.29753	10.2117	4.68512		4.53153	13.7952	5.29989	15.9632	6.35866	13.8366	6.01985	9.84049	7.25911	15.2301	6.20135	10.9043	5.35736	10.9043	4.8663	10.9608	8.32191	12.3674	3.81761	9.69226		5.60719	7.47456	5.05577	11.9755	11.1518	6.08249	6.49689	9.48739
9.27665	5.80532	8.30538	6.13983	6.42257	5.02799	7.10712	5.0017	7.80521	5.02361	7.4249	6.05899	7.36995	6.51257	8.51564	5.34856	6.64677	6.29394	10.2049	4.69348		4.64849	13.8164	5.34123	15.7766	6.36067	13.8467	5.9775	9.82738	7.25306	15.217	6.1953	10.9184	5.39165	10.8761	4.85521	10.9436	8.30578	12.3452	3.75913	9.70739		5.60888	7.44749	5.01179	12.0567	11.1518	6.10109	6.54256	9.37745
9.1747	5.80054	8.28387	6.17209	6.44806	5.07856	7.03026	5.0025	7.76499	5.05427	7.42371	6.05979	7.3811	6.5723	8.53953	5.29798	6.69735	6.29593	10.2165	4.69467		4.76345	13.8184	5.36039	15.6123	6.31631	13.8507	5.84339	9.75881	7.24298	15.21	6.20841	10.8297	5.39669	10.8357	4.8179	10.9083	8.30477	12.2817	3.68653	9.71243		5.59535	7.4255	4.95767	12.055	11.1704	6.13154	6.54594	9.36392
9.00984	5.7886	8.25878	6.22346	6.4827	5.10285	7.01831	4.99215	7.70923	5.08533	7.43565	6.06974	7.40818	6.59182	8.56382	5.22869	6.79133	6.29673	10.2204	4.68392		4.76244	13.8204	5.36241	15.6133	6.26992	13.8719	5.78995	9.6721	7.26113	15.1968	6.18925	10.7329	5.34022	10.8277	4.79975	10.991	8.30477	12.1839	3.62804	9.7205		5.61057	7.42381	4.93737	12.0483	11.2347	6.15691	6.54933	9.34531
8.93577	5.79099	8.23688	6.24217	6.50062	5.10803	7.00796	4.97263	7.65109	5.09489	7.40937	6.10001	7.43605	6.60655	8.57458	5.1817	6.86739	6.29753	10.2157	4.66441		4.75437	13.8235	5.36039	15.6385	6.22152	13.8588	5.86255	9.55008	7.30348	15.1858	6.21446	10.6744	5.30695	10.8398	4.79975	11.229	8.30376	12.071	3.60788	9.75982		5.59196	7.44242	4.93568	12.0347	11.3023	6.1789	6.55102	9.29795
8.87364	5.78342	8.2552	6.23142	6.50381	5.10723	7.00916	4.96547	7.61127	5.11599	7.37473	6.12311	7.47189	6.54443	8.58692	5.12436	6.90482	6.30629	10.1969	4.66082		4.75437	13.8225	5.36644	15.6204	6.14388	13.8507	5.99363	9.45832	7.33373	15.1797	6.29211	10.6411	5.30493	10.7934	4.80076	11.4649	8.29872	11.9782	3.5988	9.79915		5.52938	7.45426	4.92891	12.033	11.3818	6.18905	6.55102	9.25904
8.83541	5.7874	8.29662	6.19001	6.50381	5.10803	7.00995	4.96666	7.6049	5.11042	7.34048	6.13187	7.52446	6.36363	8.61002	5.05984	6.92672	6.3039	10.1703	4.69308		4.75941	13.8386	5.37955	15.4802	6.159	13.8537	6.06724	9.46135	7.34381	15.1757	6.32437	10.625	5.30594	10.7127	4.80479	11.5315	8.29872	11.9308	3.59275	9.81125		5.54122	7.4661	4.90016	12.033	11.5357	6.18736	6.55271	9.23029
8.83621	5.86545	8.31693	6.10837	6.5062	5.10803	7.01393	4.97263	7.61645	5.10962	7.31937	6.12709	7.58618	6.2581	8.60564	5.05387	6.95181	6.29952	10.1691	4.75759		4.76445	13.8789	5.37753	15.1424	6.14489	13.8527	6.06523	9.45631	7.3539	15.1595	6.33244	10.6623	5.3251	10.6724	4.80681	11.5103	8.28057	11.8774	3.59275	9.82335		5.52938	7.51515	4.81389	12.0263	11.7303	6.18228	6.54933	9.19815
8.84935	5.97098	8.33564	6.012	6.53129	5.10803	7.045	4.97861	7.64393	5.14546	7.33451	6.12072	7.6718	6.2593	8.56741	5.0471	6.9773	6.29474	10.1504	4.77272		4.77655	13.9223	5.35837	14.849	6.10254	13.8588	6.06119	9.46135	7.36902	15.1394	6.32236	10.8267	5.40476	10.6431	4.80983	11.587	8.25335	11.8078	3.57863	9.83847		5.53614	7.59465	4.75976	12.0127	11.8622	6.18566	6.56963	9.1288
8.87683	6.00842	8.36113	5.94072	6.56673	5.10206	7.07685	4.98936	7.65149	5.15303	7.35919	6.13903	7.77096	6.26487	8.51524	5.08015	6.99203	6.29514	10.0894	4.76237		4.86226	13.9414	5.33216	14.6685	6.08035	13.8709	6.06724	9.49261	7.41541	15.1263	6.30521	10.9517	5.42593	10.626	4.80983	11.9227	8.24024	11.8027	3.56553	9.83746		5.53953	7.63355	4.78006	11.9891	11.9113	6.20596	6.65758	9.06622
8.92063	6.06735	8.34839	5.93315	6.58385	5.10445	7.09358	5.02042	7.62441	5.14745	7.37911	6.16014	7.84543	6.23819	8.48577	5.13869	6.99562	6.31346	10.0464	4.76078		4.90966	13.9334	5.32308	14.5485	6.04708	13.8769	6.07632	9.52689	7.48498	15.1051	6.33748	11.0051	5.4098	10.6401	4.80378	12.3341	8.23015	11.7816	3.56553	9.83242		5.54798	7.63017	4.79698	11.9535	11.8588	6.23133	6.73031	9.06622
8.96404	6.1235	8.32887	5.99488	6.58385	5.11361	7.12225	5.05029	7.61844	5.14427	7.41136	6.17846	7.88406	6.19718	8.50807	5.15303	6.99681	6.30629	10.0173	4.76994		4.92277	13.9283	5.33921	14.4971	6.02893	13.9031	6.08035	9.51378	7.55053	15.0799	6.49781	11.0939	5.41383	10.6532	4.80479	12.433	8.22108	11.7271	3.56956	9.83948		5.55813	7.63017	4.79529	11.9282	11.8436	6.23641	6.74046	9.04423
8.98555	6.07373	8.33644	6.03271	6.57668	5.10803	7.19114	5.05307	7.61645	5.15383	7.46512	6.18403	7.90038	6.18563	8.53635	5.15422	7.01592	6.2812	9.99544	4.78228		4.93083	13.9283	5.35031	14.4658	6.03195	13.9979	6.08035	9.46034	7.60094	15.0607	6.58554	11.23	5.42795	10.6381	4.80479	12.4299	8.21503	11.7301	3.57662	9.84654		5.55813	7.63017	4.77668	11.9146	11.8487	6.25163	6.74215	8.97657
8.9947	6.07691	8.36471	6.04266	6.5723	5.10405	7.30862	5.05148	7.61605	5.15383	7.52087	6.18244	7.92428	6.20514	8.55865	5.16617	7.04938	6.24934	9.99624	4.81852		4.92781	13.9283	5.34526	14.4355	6.02993	14.0645	6.0864	9.419	7.62111	15.0032	6.60369	11.3258	5.44509	10.631	4.80479	12.4158	8.20898	11.7846	3.5746	9.83646		5.54968	7.63355	4.79867	11.9197	11.8504	6.26516	6.7523	8.90722
9.04408	6.13187	8.41807	6.01519	6.58943	5.10126	7.38627	4.99892	7.61565	5.15502	7.56707	6.18403	7.95056	6.2358	8.57697	5.16259	7.08203	6.22266	9.99186	4.83803		4.92882	13.9273	5.34022	14.4517	6.00674	13.9556	6.13783	9.39177	7.58178	14.9004	6.60974	11.3903	5.46526	10.6542	4.8179	12.2696	8.1989	11.8975	3.57057	9.81629		5.56997	7.64878	4.84434	11.9163	11.8791	6.26855	6.79459	8.95966
9.0636	6.11673	8.43679	5.94589	6.64677	5.10564	7.42092	4.91409	7.61247	5.11719	7.62242	6.18722	7.95215	6.25731	8.57617	5.17334	7.11707	6.23102	10.0209	4.83963		4.93285	13.9273	5.36644	14.4728	6.0138	13.7952	6.19429	9.34236	7.52834	14.8328	6.60671	11.4367	5.48542	10.6925	4.83706	12.4541	8.19285	12.0508	3.57561	9.78301		5.61395	7.65216	4.86463	11.9146	11.9586	6.27362	6.80136	9.05945
8.92302	6.12629	8.38263	5.90886	6.7523	5.12077	7.44043	4.88303	7.61406	5.09449	7.69968	6.18085	7.96609	6.27085	8.56382	5.2036	7.12902	6.2366	10.1587	4.87467		4.93487	13.9344	5.41585	14.4678	6.06623	13.6097	6.20438	9.29396	7.51523	14.7391	6.58352	11.4609	5.51971	10.7157	4.82899	13.1418	8.20495	12.2646	3.59174	9.73663		5.64778	7.65216	4.87478	11.9146	12.0584	6.3176	6.7523	8.99856
8.71993	6.1251	8.30578	5.90647	6.89407	5.14228	7.45437	4.8894	7.61486	5.08971	7.73592	6.15656	8.01666	6.26965	8.55905	5.2936	7.13061	6.23102	10.2893	4.87865		4.9389	13.9525	5.46727	14.4769	6.06018	13.2951	6.19631	9.23145	7.53238	14.5666	6.55528	11.469	5.55803	10.7288	4.81588	14.2944	8.20797	12.5661	3.59174	9.74066		5.64947	7.65554	4.87478	11.9146	12.1227	6.38864	6.73031	8.8717
8.52958	6.11912	8.21418	5.90886	7.03783	5.20042	7.45318	4.91609	7.6268	5.0921	7.74468	6.15098	8.06326	6.28439	8.55506	5.37325	7.14057	6.23461	10.3475	4.86193		4.93487	13.9606	5.54189	14.5162	5.91196	12.7919	6.18623	9.19515	7.59388	14.5061	6.54318	11.472	5.56609	10.7389	4.81286	15.6153	8.20394	12.6397	3.60687	9.7578		5.60549	7.67246	4.86971	11.8943	12.1785	6.46645	6.68464	8.8125
8.39458	6.11594	8.11264	5.90886	7.10433	5.25617	7.45915	4.92923	7.64353	5.06821	7.74388	6.15417	8.0991	6.32301	8.52002	5.37842	7.13818	6.22903	10.3853	4.85078		4.93184	13.9586	5.58323	14.5656	5.84641	12.3503	6.17614	9.19313	7.62313	14.5081	6.5331	11.466	5.57618	10.7601	4.81487	16.5642	8.20394	12.5802	3.63813	9.77596		5.51754	7.68261	4.82573	11.8791	12.2259	6.5341	6.63898	8.95458
8.34719	6.11554	8.07242	5.93594	7.11389	5.25816	7.50256	4.94954	7.6491	4.98856	7.74308	6.147	8.1206	6.3258	8.45033	5.37882	7.14535	6.24456	10.398	4.86432		4.94797	13.9586	5.6397	14.5707	5.89381	12.2878	6.16909	9.19212	7.62615	14.487	6.53008	11.4438	5.58424	10.7813	4.81689	17.1238	8.20293	12.6487	3.64317	9.80217		5.46849	7.67753	4.81051	11.8707	12.2123	6.56793	6.76753	9.14741
8.33684	6.11793	8.08476	5.95227	7.11389	5.28763	7.57901	4.98219	7.65189	4.97861	7.74468	6.102	8.14688	6.34691	8.35993	5.37484	7.18039	6.28478	10.3953	4.86193		4.97419	13.9586	5.73852	14.5767	5.91498	12.2434	6.16304	9.19212	7.62615	14.4668	6.53008	11.4165	5.58223	10.7813	4.79975	17.4969	8.20091	12.4219	3.65527	9.82536		5.46679	7.66569	4.85618	11.8707	12.3595	6.57808	6.95697	9.18462
8.33684	6.11912	8.12379	5.95426	7.12783	5.32068	7.6491	4.98179	7.65547	5.01564	7.72516	6.11872	8.17834	6.37717	8.37427	5.44174	7.24968	6.30589	10.3746	4.79941		4.97722	13.9596	5.82322	14.5777	5.92305	12.076	6.17009	9.18204	7.60397	14.4638	6.53008	11.3994	5.55198	10.7813	4.77857	17.7167	8.20091	12.0901	3.65829	9.81629		5.46679	7.67584	4.9103	11.8639	12.6504	6.58654	7.1498	9.17447
8.32728	6.11634	8.16082	5.97735	7.19552	5.30555	7.68136	4.98179	7.66105	5.07936	7.73233	6.14023	8.20542	6.37518	8.5244	5.56002	7.31579	6.32301	10.3479	4.73609		4.93789	13.9606	5.89885	14.5596	5.93212	11.833	6.18421	9.15683	7.55053	14.4577	6.52907	11.3923	5.4703	10.7924	4.70597	17.8912	8.20091	12.0528	3.65023	9.77596		5.46679	7.70798	4.93906	11.8605	12.7908	6.595	7.33416	9.17109
8.34042	6.13226	8.14967	5.99766	7.29389	5.31909	7.67539	4.9798	7.67379	5.08573	7.72317	6.15377	8.23171	6.37956	8.62157	5.61258	7.35481	6.33217	10.3861	4.72932		4.94495	13.9566	5.96338	14.5737	5.94019	11.3449	6.19631	9.14574	7.53943	14.4547	6.51092	11.3853	5.42694	10.8166	4.63841	18.1069	8.20696	12.1698	3.64821	9.81226		5.46679	7.73166	4.97627	11.8673	12.8669	6.6339	7.46779	9.17616
8.31732	6.15098	8.15963	6.01837	7.37632	5.32944	7.6268	4.97861	7.68335	5.04989	7.67021	6.2354	8.24524	6.38036	8.62754	5.65877	7.34804	6.33098	10.3905	4.77312		4.951	13.9485	6.00372	14.7118	5.96338	10.6593	6.20236	9.14775	7.54145	14.4547	6.45647	11.3812	5.41988	10.8448	4.71706	18.2481	8.27049	12.1859	3.65729	9.87679		5.46172	7.74011	5.05239	11.874	13.0344	6.7134	7.61833	9.25735
8.28786	6.15257	8.19308	6.03072	7.45357	5.35732	7.57623	4.979	7.69012	5.01564	7.61247	6.31346	8.24365	6.37956	8.62874	5.67152	7.3357	6.3266	10.265	4.88184		4.96007	13.9445	6.04203	14.8681	5.97952	10.0089	6.19329	9.13162	7.54246	14.4365	6.40403	11.3823	5.34829	10.8791	4.81084	18.2975	8.38846	12.1879	3.66737	9.93225		5.46341	7.73673	5.10651	11.8825	13.349	6.7726	7.89235	9.23198
8.28945	6.15297	8.24206	6.0351	7.54756	5.44533	7.53123	4.98777	7.69769	5.01046	7.58658	6.35567	8.24286	6.37757	8.63471	5.67271	7.31459	6.32341	10.0978	5.00529		4.97016	13.9475	6.08842	14.9498	5.98153	9.44219	6.18824	9.08423	7.54448	14.3881	6.3879	11.3732	5.31703	10.9204	4.80176	18.3076	8.46611	12.2383	3.66636	9.9625		5.4651	7.76887	5.0896	11.8842	13.6196	6.76245	8.07164	9.13388
8.29303	6.15098	8.28268	6.03271	7.62043	5.55325	7.49818	4.96268	7.70406	5.01684	7.58459	6.35806	8.2548	6.37638	8.64307	5.66714	7.28433	6.31067	9.99704	5.05188		4.9752	13.9505	6.12169	14.9962	5.99363	9.13162	6.19833	9.0328	7.5475	14.3972	6.37479	11.3591	5.313	10.9396	4.8421	18.3106	8.52863	12.1264	3.66737	9.97762		5.45157	7.87712	5.03547	11.8808	13.7431	6.74215	7.93971	9.2472
8.28188	6.14182	8.30777	6.05023	7.66424	5.58311	7.48981	4.91847	7.72556	5.01843	7.59654	6.36005	8.29901	6.37279	8.63152	5.66077	7.26482	6.29155	9.94845	5.04949		5.00243	13.9505	6.15598	14.9851	6.01683	9.01062	6.19833	8.98339	7.53338	14.4023	6.36269	11.349	5.31098	10.9366	4.94394	18.3187	8.6466	11.715	3.66939	9.98872		5.43127	7.99722	4.97965	11.8825	13.8023	6.69818	8.05303	9.26412
8.25162	6.12589	8.33803	6.06496	7.70485	5.57117	7.49061	4.8233	7.761	5.0025	7.60729	6.34731	8.31493	6.36523	8.57139	5.66395	7.25167	6.29753	9.9385	5.1825		5.03167	13.9495	6.2074	14.9095	6.02792	8.91079	6.2064	8.95112	7.51624	14.4053	6.35462	11.349	5.31098	10.9456	4.99839	18.4175	8.80693	11.3167	3.66737	9.97762		5.39406	8.09025	4.94583	11.8893	13.8683	6.6339	8.17989	9.16263
8.24883	6.10917	8.38184	6.05939	7.77574	5.59824	7.4922	4.76237	7.78012	4.95989	7.60649	6.27124	8.34719	6.34014	8.55387	5.6532	7.23216	6.30589	9.92695	5.32586		5.06293	13.9475	6.24673	14.8278	6.01683	8.82508	6.18623	8.93802	7.51523	14.4083	6.34051	11.35	5.31501	10.9668	5.06898	18.595	9.01163	11.3853	3.66838	9.9625		5.36531	8.17313	4.92891	11.8876	13.8953	6.58654	8.14945	9.06284
8.24644	6.08965	8.43082	6.0347	7.82432	5.66435	7.48304	4.76436	7.78291	4.95989	7.59694	6.15098	8.40653	6.24337	8.58493	5.65519	7.22818	6.28837	9.83974	5.384		5.09923	13.9435	6.26286	14.8117	5.98557	8.77971	6.16808	8.93398	7.53742	14.4073	6.34656	11.3631	5.32913	10.9809	5.13049	18.7684	9.29901	11.9187	3.66737	9.96048		5.35854	8.20865	4.92384	11.8842	13.9072	6.5747	8.14776	9.02562
8.24564	6.07731	8.48099	5.98094	7.83149	5.76868	7.48862	4.75082	7.79047	4.93998	7.56826	6.13027	8.39538	6.08846	8.57936	5.65439	7.23136	6.27005	9.75054	5.39276		5.11637	13.9394	6.28807	14.8026	5.94221	8.76155	6.16909	8.96121	7.5959	14.368	6.39395	11.3863	5.33518	10.989	5.15368	18.9126	9.53899	12.6951	3.66939	9.9746		5.33148	8.22049	4.96443	11.9011	13.9495	6.55948	8.15114	9.06791
8.24325	6.08726	8.51723	5.90846	7.84822	5.89492	7.49738	4.74326	7.78888	4.87109	7.5141	6.13824	8.34639	5.97536	8.62077	5.654	7.23336	6.27124	9.68722	5.39515		5.11738	13.9384	6.33748	14.7955	5.92204	8.79987	6.17009	8.97028	7.66245	14.248	6.41916	11.3954	5.34728	11.0374	5.17989	19.0024	9.5884	13.3122	3.66334	9.97157		5.31287	8.25601	5.049	11.918	13.9528	6.48674	8.16467	9.13895
8.2333	6.08288	8.51484	5.8543	7.87649	5.95067	7.49897	4.74206	7.78928	4.85317	7.47428	6.14063	8.30617	5.91762	8.71316	5.66873	7.23933	6.27363	9.62709	5.39475		5.11939	13.9364	6.37378	14.8086	5.94422	8.88356	6.16808	8.96927	7.6927	13.9989	6.39092	11.3923	5.38257	11.1029	5.22426	19.0417	9.57126	13.5744	3.67745	9.97157		5.35008	8.32874	5.11328	11.9265	13.9495	6.43938	8.16467	9.23198
8.22932	6.10877	8.49055	5.85112	7.91153	5.95147	7.49499	4.74286	7.78968	4.85197	7.46194	6.14381	8.29901	5.90129	8.78126	5.66993	7.26322	6.25332	9.53868	5.3836		5.1325	13.9203	6.44638	14.8036	5.94725	8.95213	6.15598	8.99751	7.70783	13.651	6.33849	11.3933	5.40072	11.1372	5.25855	19.0508	9.58336	13.6561	3.70266	9.97057		5.40421	8.36595	5.14542	11.9315	13.9545	6.48336	8.26954	9.33009
8.21976	6.11434	8.47064	5.85948	7.95773	5.95028	7.49539	4.74644	7.79047	4.87746	7.48026	6.13784	8.43958	5.90448	8.79041	5.70218	7.28513	6.24098	9.40926	5.38559		5.16578	13.9062	6.55428	14.7935	5.94624	9.00154	6.13279	9.06608	7.74514	13.4191	6.2548	11.3994	5.40677	11.1695	5.2898	19.0457	9.76385	13.6924	3.69964	9.95645		5.44311	8.3761	5.17756	11.9332	13.9613	6.53918	8.4167	9.37406
8.13215	6.12191	8.45033	5.84156	7.98281	5.93833	7.49499	4.73728	7.78768	4.90892	7.50694	6.12788	8.70042	5.8316	8.79957	5.71174	7.313	6.24456	9.26908	5.38201		5.20611	13.9031	6.62789	14.7481	5.96943	9.03683	6.12674	9.2143	7.80766	13.3082	6.17009	11.4024	5.41383	11.1977	5.33619	19.0447	10.0099	13.7186	3.69157	9.95342		5.45495	8.38456	5.23168	11.9315	13.9647	6.52057	8.43192	9.36561
8.04613	6.12589	8.42086	5.83081	7.98242	5.93833	7.49021	4.74923	7.76499	4.89657	7.53362	6.10598	8.8617	5.76072	8.83422	5.71931	7.35322	6.24178	9.18585	5.38161		5.2283	13.9021	6.71259	14.6402	5.95935	9.04591	6.12674	9.38673	7.86211	13.2285	6.10354	11.4034	5.41686	11.2108	5.37451	19.0245	10.1279	13.7337	3.69359	9.95544		5.4059	8.38964	5.26889	11.9315	13.9731	6.51042	8.43361	9.35038
8.02662	6.1251	8.40254	5.79776	7.9864	5.88337	7.48543	4.78387	7.71003	4.83206	7.55034	6.08607	8.94134	5.75793	8.8609	5.79258	7.37313	6.25014	9.1759	5.3828		5.19099	13.8971	6.83359	14.5283	5.89179	9.07616	6.10254	9.50168	7.8853	13.2134	6.04002	11.4034	5.43501	11.235	5.38156	19.0245	10.2075	13.769	3.69157	9.95847		5.38053	8.39133	5.2672	11.9282	13.9799	6.50197	8.43361	9.38421
8.02582	6.12788	8.40692	5.74081	7.9868	5.7663	7.49857	4.77551	7.64671	4.77551	7.54915	6.08209	8.9963	5.76231	8.86926	5.9224	7.40698	6.24735	9.18028	5.38639		5.15973	13.893	6.91224	14.4315	5.88271	9.14574	6.08539	9.58538	7.90042	13.1953	6.02691	11.4125	5.63063	11.2582	5.3856	19.0568	10.2811	13.8124	3.69258	9.97258		5.38222	8.3964	5.27228	11.9265	13.9833	6.56455	8.43361	9.50938
8.02582	6.12271	8.4125	5.68785	7.98202	5.65798	7.55074	4.78467	7.57304	4.86989	7.54835	6.07373	9.02378	5.75515	8.85413	5.91961	7.50216	6.23182	9.09864	5.39356		5.15569	13.884	6.91627	14.3478	5.88171	9.1891	6.08741	9.65899	7.91051	13.0501	6.0259	11.47	5.91498	11.2441	5.40274	19.1072	10.3396	13.8255	3.68451	9.96956		5.3856	8.39471	5.27397	11.9214	13.9833	6.61868	8.45729	9.6041
8.02144	6.1024	8.39498	5.6759	7.96649	5.57873	7.64791	4.8018	7.51649	5.00648	7.54875	6.08209	9.05802	5.71612	8.81072	5.85789	7.583	6.21987	8.93298	5.38201		5.16376	13.8688	6.90115	14.2803	5.88171	9.20523	6.08741	9.7336	7.91757	12.8726	6.02086	11.5537	6.03094	11.2078	5.41383	19.1395	10.3951	13.8255	3.66132	9.92217		5.39237	8.40993	5.27566	11.9129	13.9816	6.60853	8.63151	9.63455
8.01308	6.13864	8.34958	5.67988	7.94777	5.5401	7.77415	4.82688	7.51251	5.08015	7.54636	6.12908	9.09625	5.68386	8.7478	5.94032	7.61486	6.22625	8.76692	5.43338		5.16981	13.8608	6.89207	14.245	5.87061	9.22237	6.0743	9.84251	7.91555	12.7597	6.02893	11.6122	6.07632	11.1957	5.41787	19.1667	10.4788	13.8235	3.623	9.88587		5.39744	8.42854	5.28243	11.9129	13.9799	6.63052	8.81588	9.59734
7.99596	6.16173	8.27949	5.66355	7.95454	5.52696	7.86494	4.86272	7.53481	5.09091	7.54437	6.15855	9.09187	5.67948	8.69205	6.1681	7.68136	6.24377	8.64267	5.42223		5.17284	13.8628	6.88502	14.2006	5.86255	9.23145	6.06422	9.95947	7.90647	12.6982	6.04405	11.6495	6.10657	11.1967	5.43602	19.1869	10.5413	13.8356	3.57359	9.86771		5.40421	8.43023	5.28243	11.9129	13.985	6.64067	8.85309	9.50938
7.96012	6.15695	8.23887	5.62134	8.08675	5.53612	7.88883	4.87228	7.53481	5.09648	7.54517	6.21589	9.07395	5.66236	8.6586	6.32341	7.76459	6.24576	8.59369	5.42741		5.18292	13.8648	6.88098	14.1603	5.85952	9.23346	6.0743	10.024	7.90143	12.6649	6.00977	11.6777	6.1106	11.2048	5.44106	19.1889	10.5705	13.9394	3.58065	9.91107		5.41436	8.43361	5.28919	11.9113	13.9968	6.66942	8.89538	9.45018
7.92905	6.15695	8.2321	5.60302	8.47223	5.53572	7.93025	4.86113	7.52804	5.13909	7.54278	6.32182	9.03254	5.64285	8.65343	6.30828	7.79804	6.24536	8.60325	5.42502		5.18998	13.8567	6.89812	14.2561	5.85045	9.25565	6.07934	10.0371	7.89034	12.6608	5.94927	11.7029	6.0985	11.2098	5.44106	19.1899	10.6048	14.1714	3.58771	9.95242		5.40759	8.437	5.2875	11.9146	14.0104	6.8115	8.9715	9.40113
7.92189	6.12111	8.23887	5.60103	8.929	5.5413	8.00671	4.86033	7.53083	5.16378	7.51769	6.32301	9.00546	5.64683	8.63511	6.3716	7.79525	6.27164	8.60484	5.44572		5.19704	13.8578	6.92535	14.4759	5.83532	9.298	6.08136	10.0321	7.86513	12.675	5.92305	11.7251	6.04909	11.2078	5.42392	19.1889	10.6855	14.3781	3.57662	9.91208		5.45157	8.43869	5.29765	11.9163	13.9867	6.97727	8.9698	9.37914
7.93622	6.06178	8.27193	5.56081	9.16873	5.55962	8.04613	4.88622	7.52924	5.15064	7.47587	6.24217	8.9951	5.61696	8.6375	6.47394	7.79525	6.28478	8.58055	5.62732		5.22225	13.8588	6.93241	14.7028	5.83129	9.31716	6.10657	10.0321	7.84396	12.679	5.91397	11.7352	5.97145	11.2179	5.38862	19.1909	10.7934	14.4426	3.58468	9.90301		5.55644	8.44714	5.30441	11.9146	13.9934	7.10243	9.01209	9.38421
7.94618	6.04943	8.27432	5.57634	9.17271	5.5628	8.03538	4.88741	7.51809	5.13391	7.44203	6.20554	8.98993	5.56678	8.64865	6.53885	7.79525	6.2816	8.55626	5.68984		5.26762	13.8567	6.93442	14.8691	5.83129	9.32724	6.16203	10.0492	7.85303	12.677	5.92607	11.7332	5.87666	11.2502	5.37249	19.2	10.863	14.4365	3.59275	9.90502		5.77295	8.46744	5.30272	11.8977	14.034	7.17348	9.02393	9.38929
7.93383	6.09762	8.23927	5.56639	9.13647	5.55484	8.03498	4.87348	7.47986	5.10803	7.44561	6.2593	8.98674	5.68705	8.62475	6.57788	7.77932	6.26686	8.55984	5.67948		5.31199	13.8588	6.95257	14.8802	5.83129	9.35446	6.17614	10.0502	7.86816	12.684	5.93212	11.7251	5.79499	11.2613	5.35535	19.2071	10.8781	14.4789	3.58973	9.82536		6.04696	8.49958	5.30272	11.8571	14.0526	7.17009	9.02393	9.39098
7.91432	6.26766	8.21299	5.51979	9.16236	5.55922	8.06326	4.80697	7.3815	5.0702	7.51251	6.37996	8.97997	5.87222	8.58413	6.57828	7.73472	6.27204	8.56064	5.67431		5.31098	13.8598	6.97173	14.7522	5.82221	9.38068	6.18018	10.0472	7.85202	12.7103	5.93212	11.6938	5.78591	11.2552	5.35333	19.2091	10.865	14.6019	3.58569	9.76184		6.21273	8.54356	5.30272	11.8267	14.0442	7.31387	9.02732	9.38929
7.90038	6.41301	8.20303	5.46205	9.17152	5.56161	8.10627	4.71578	7.2672	5.05825	7.61207	6.40903	8.94493	6.02673	8.54232	6.62447	7.73353	6.2597	8.56064	5.6751		5.29888	13.8608	6.98383	14.5807	5.81717	9.3948	6.20337	10.0472	7.80161	12.7405	5.95128	11.6414	5.78591	11.2915	5.37148	19.2101	10.8418	14.7249	3.57863	9.80318		6.36496	8.62982	5.29596	11.8301	14.0425	7.71643	9.0899	9.41297
7.88366	6.43213	8.19985	5.43816	9.17032	5.5632	8.16839	4.67197	7.18198	5.06861	7.73114	6.40903	8.88002	6.0566	8.50369	6.69456	7.79007	6.19598	8.56024	5.68386		5.30291	13.8658	6.99291	14.4466	5.81213	9.40186	6.24774	10.0492	7.77135	12.7708	5.96137	11.597	5.79196	11.3742	5.37753	19.205	10.8176	14.8096	3.56553	9.80419		6.46137	8.73808	5.29596	11.8301	14.0306	8.15283	9.20492	9.43496
7.87768	6.43014	8.19985	5.45568	9.16833	5.57475	8.2098	4.65923	7.0657	5.0698	7.84822	6.41341	8.83302	5.96939	8.46626	6.70292	7.84184	6.10957	8.56542	5.70377		5.31501	13.8739	6.96871	14.3317	5.79801	9.39883	6.26286	10.0522	7.7522	12.8161	5.94624	11.5678	5.78894	11.4246	5.37753	19.2081	10.8236	14.9377	3.58267	9.84351		6.46137	8.84125	5.29596	11.7895	14.0154	8.34735	9.33347	9.43665
7.88366	6.43213	8.19985	5.48156	9.17112	5.57515	8.20343	4.6668	6.99084	5.08294	7.91034	6.42536	8.80595	5.93913	8.48737	6.70451	7.8733	6.03112	8.55586	5.70099		5.34325	13.8779	6.94148	14.1724	5.77986	9.39379	6.2548	10.0412	7.76127	12.8524	5.93313	11.5446	5.7728	11.4115	5.37753	19.2212	10.8579	15.1626	3.66031	9.88587		6.46476	8.94951	5.29596	11.6998	13.9816	8.37272	9.44849	9.34362
7.90675	6.44129	8.20303	5.48236	9.21253	5.56678	8.21179	4.666	6.96893	5.12874	7.9191	6.40823	8.80157	5.91165	8.6136	6.7073	7.88684	5.97815	8.53117	5.71453		5.41988	13.8779	6.94753	13.9909	5.75869	9.37967	6.25278	10.0321	7.75421	12.8101	5.93313	11.5194	5.77079	11.4085	5.37753	19.2403	10.8519	15.3219	3.78635	9.90603		6.47321	9.03239	5.29596	11.6186	13.8936	8.37441	9.47048	9.17955
7.92308	6.4373	8.22533	5.6297	9.31727	5.56917	8.24007	4.65604	6.96017	5.17852	7.91273	6.39828	8.80157	5.9232	8.73745	6.72004	7.89401	5.98333	8.45949	5.81329		5.48643	13.8779	6.93241	13.884	5.67903	9.33631	6.25379	10.0119	7.62615	12.7183	5.92607	11.4871	5.76877	11.4206	5.36745	19.2575	10.8035	15.3299	3.90131	9.89797		6.50197	9.08821	5.29427	11.5933	13.875	8.4353	9.48232	9.07637
7.92866	6.4385	8.2337	5.73364	9.4212	5.58988	8.27153	4.66321	6.95539	5.19883	7.91472	6.44168	8.79241	5.90249	8.8167	6.73637	7.89441	5.91005	8.29104	5.95824		5.5066	13.8779	7.03627	13.8295	5.56811	9.27985	6.25883	9.95544	7.59388	12.6054	5.93212	11.4256	5.77079	11.4417	5.35837	19.2595	10.7278	15.2987	3.94164	9.90906		6.53749	9.14741	5.30103	11.6	13.8649	8.62644	9.5838	9.02901
7.94419	6.43611	8.20741	5.72727	9.50284	5.60462	8.28786	4.66361	6.9538	5.19922	7.90715	6.47792	8.76772	5.87302	8.86847	6.73239	7.87131	5.68466	8.17675	5.96979		5.56004	13.8729	7.33474	13.765	5.5308	9.25161	6.27395	9.91813	7.66044	12.4239	5.93717	11.3389	5.7849	11.4478	5.3493	19.2575	10.6522	15.3037	3.94063	9.93628		6.58316	9.19646	5.27566	11.622	13.7786	8.75668	9.79016	9.0307
8.01467	6.44726	8.16799	5.7424	9.57253	5.61139	8.29303	4.67516	6.95181	5.19962	7.88923	6.47195	8.74342	5.87979	8.89993	6.70332	7.83746	5.51621	8.15007	6.01957		5.62357	13.8608	7.46986	13.7236	5.54895	9.23447	6.30421	9.87578	7.71892	12.1254	5.93717	11.2613	5.77986	11.4417	5.31501	19.2575	10.5655	15.3158	3.9366	10.0079		6.68972	9.21507	5.23845	11.6271	13.7076	8.76176	9.92379	9.06284
8.11025	6.52213	8.11542	5.75076	9.62111	5.61378	8.31414	4.67436	6.94544	5.21157	7.88206	6.50739	8.74342	5.92957	8.95807	6.63443	7.83069	5.4513	8.1202	6.17368		5.64172	13.8648	7.48397	13.6954	5.55097	9.19111	6.34656	9.86771	7.728	11.7543	5.93515	11.2108	5.76978	11.4337	5.27871	19.2615	10.4526	15.3148	3.92954	10.1511		6.8132	9.24382	5.208	11.6085	13.7076	8.66703	9.94747	9.07637
8.18312	6.59341	8.0537	5.73046	9.66332	5.62612	8.36631	4.67396	6.95739	5.24064	7.87888	6.56036	8.72471	5.97656	9.10103	6.53487	7.82671	5.34179	8.08197	6.3039		5.66794	13.9243	7.48196	13.644	5.55198	9.14271	6.41613	9.88284	7.69573	11.6152	5.94523	11.1927	5.77986	11.4075	5.25955	19.2706	10.382	15.3219	3.93156	10.2106		6.85041	9.27596	5.20124	11.5882	13.6907	8.53003	9.99821	9.07806
8.23967	6.59341	8.01786	5.70616	9.73102	5.65161	8.39936	4.70702	6.99522	5.26135	7.88525	6.56394	8.71674	5.98492	9.21652	6.47235	7.78609	5.27329	8.06206	6.35009		5.70928	13.9878	7.47792	13.5663	5.555	9.09431	6.55226	9.88183	7.70783	11.8169	5.95431	11.2008	5.81616	11.3207	5.25855	19.2877	10.3779	15.334	3.93156	10.2247		6.8521	9.28103	5.19954	11.5899	13.6907	8.4167	10.1285	9.06284
8.22414	6.62686	8.00233	5.68546	9.77084	5.68665	8.40613	4.75003	7.03066	5.25577	7.8956	6.56872	8.72949	5.98492	9.16076	6.45961	7.71242	5.25657	8.04613	6.35368		5.7002	14.013	7.47087	13.4615	5.55298	9.03885	6.69645	9.87982	7.77539	11.7715	5.96237	11.2078	5.83936	11.1826	5.25955	19.3109	10.3779	15.3703	3.93055	10.38		6.83011	9.28273	5.19954	11.5797	13.7008	8.35411	10.2096	9.08144
8.07799	6.6404	7.99675	5.6751	9.77642	5.73603	8.4121	4.74963	7.06132	5.25497	7.8287	6.57031	8.72511	5.98333	8.91347	6.45881	7.62481	5.24701	8.02224	6.35567		5.67701	14.0241	7.44667	13.3022	5.55298	8.99247	6.78216	9.88385	7.89236	11.1766	5.97347	11.2169	5.83734	11.109	5.25653	19.3301	10.391	15.4439	3.93357	10.5806		6.72862	9.26243	5.2283	11.5628	13.7127	8.36257	10.2164	9.10174
7.81795	6.65195	7.99675	5.67032	9.78	5.72886	8.42962	4.74963	7.0892	5.23506	7.71879	6.56792	8.70958	5.9893	8.73387	6.45841	7.54118	5.24781	8.01587	6.35009		5.67701	14.0312	7.42347	13.1549	5.53383	8.97633	6.83359	9.86973	8.01437	10.2862	5.98456	11.2118	5.82322	11.105	5.24846	19.3432	10.3951	15.4973	3.93257	10.6996		6.6136	9.2286	5.32471	11.5527	13.6924	8.39302	10.2485	9.03916
7.58658	6.7069	7.98958	5.64324	9.79593	5.69302	8.42684	4.72096	7.1119	5.20679	7.63516	6.57987	8.68369	6.00802	8.71117	6.43332	7.49379	5.25179	8.01627	6.32501		5.66794	14.0241	7.4265	13.0753	5.47433	8.92793	6.86989	9.86469	8.12125	9.33026	5.98557	11.2048	5.82726	11.104	5.2404	19.3492	10.3789	15.4721	3.94063	10.7057		6.54594	9.2472	5.37207	11.556	13.804	8.41501	10.4075	8.89031
7.4468	6.76026	7.97804	5.61059	9.79792	5.69581	8.45391	4.71737	7.1111	5.19803	7.55154	6.58226	8.66697	6.00642	8.71714	6.42974	7.46034	5.25736	8.02542	6.30589		5.63769	14.002	7.41843	13.038	5.40476	8.8392	6.90115	9.94939	8.24931	8.68996	5.98053	11.1967	5.82726	11.0979	5.23233	19.3492	10.3447	15.3975	3.92853	10.6754		6.47829	9.26581	5.36869	11.5594	14.1355	8.43869	10.504	8.78205
7.39225	6.76265	7.96609	5.6078	9.79872	5.69183	8.75457	4.71857	7.10712	5.21953	7.45079	6.54721	8.66179	6.01996	8.73825	6.42695	7.42251	5.24422	8.03259	6.31186		5.59332	13.9687	7.40835	13.0087	5.35333	8.76357	6.93947	10.0623	8.35317	8.39956	5.97952	11.1917	5.82423	11.0979	5.22729	19.3502	10.3114	15.342	3.90433	10.6643		6.40894	9.26243	5.37376	11.5425	14.2167	8.45222	10.4938	8.76176
7.39185	6.77659	7.95175	5.61338	9.79952	5.66873	9.37501	4.71618	7.11747	5.22471	7.36915	6.53845	8.66219	6.02435	8.76692	6.42775	7.40579	5.2267	8.02184	6.32779		5.53483	13.9283	7.39726	12.9906	5.33316	8.73332	6.97879	10.0714	8.41468	8.20192	5.98456	11.1927	5.82322	11.0878	5.20611	19.3502	10.27	15.3078	3.92147	10.6623		6.36834	9.24382	5.38222	11.5121	14.1693	8.44038	10.482	8.75668
7.36278	6.81482	7.95932	5.61696	9.81783	5.69621	10.0476	4.71219	7.11827	5.22431	7.28074	6.55996	8.66975	6.0355	8.80634	6.43253	7.4261	5.19046	8.01905	6.33854		5.47332	13.9021	7.39524	12.9623	5.3251	8.72324	7.01408	10.0301	8.4772	8.03554	6.01078	11.1927	5.87969	11.0767	5.17889	19.3512	10.2085	15.2815	3.94971	10.6189		6.34804	9.32501	5.3873	11.5002	14.2049	8.4167	10.4854	8.75161
7.31858	6.83911	8.04494	5.61378	9.84014	5.70736	10.5681	4.70861	7.133	5.21635	7.13778	6.55956	8.78046	6.06138	8.83462	6.42576	7.43486	5.18847	8.02503	6.34133		5.46828	13.9011	7.39322	12.9089	5.29888	8.69601	7.01711	10.0018	8.54678	7.79152	6.02489	11.1866	6.12169	11.0808	5.17082	19.3573	10.143	15.2614	3.94769	10.5998		6.35312	9.89165	5.3856	11.4952	14.1829	8.40655	10.4972	8.75499
7.29667	6.85225	8.1218	5.59864	9.86443	5.67789	10.8449	4.69109	7.14057	5.21953	6.98486	6.56792	8.95249	6.07293	8.83302	6.415	7.38468	5.20002	8.03538	6.34412		5.45013	13.9082	7.37507	12.8484	5.25149	8.64559	6.95762	9.96653	8.59719	7.64027	6.02893	11.1917	6.27093	11.0828	5.15872	19.3613	10.0946	15.216	3.95374	10.5998		6.3565	10.5784	5.37546	11.485	14.2252	8.4167	10.4938	8.74146
7.29866	6.8646	8.16281	5.57794	9.89031	5.64563	10.9221	4.66481	7.14415	5.20281	6.84827	6.6177	9.07156	6.08726	8.80674	6.41819	7.3134	5.25259	8.05171	6.3481		5.41585	13.9082	7.36398	12.7697	5.2293	8.62442	6.9314	9.91612	8.63954	7.51019	6.03397	11.1957	6.30925	11.0808	5.16275	19.3644	10.0613	15.1454	3.95273	10.6542		6.36327	11.0418	5.36023	11.4867	14.3351	8.4167	10.4921	8.70763
7.29986	6.86022	8.16958	5.55444	9.90465	5.61816	10.8895	4.65764	7.14774	5.20002	6.72004	6.74274	9.18904	6.07811	8.78882	6.41301	7.23535	5.32705	8.08834	6.34731		5.41282	13.9172	7.36196	12.6669	5.23334	8.64358	6.93644	9.86469	8.67282	7.37306	6.00271	11.1967	6.33748	11.0808	5.18695	19.3694	10.0522	15.096	3.94971	10.8367		6.37342	11.3091	5.36023	11.4985	14.5026	8.40993	10.5192	8.64674
7.29628	6.83672	8.11622	5.54409	9.94925	5.6086	10.8118	4.65764	7.13261	5.19365	6.62885	6.8204	9.28262	6.05023	8.81869	6.42536	7.17243	5.39754	8.10905	6.34531		5.43501	13.9273	7.36196	12.5973	5.2414	8.6698	6.95257	9.82335	8.695	7.30751	5.92809	11.1927	6.3758	11.0404	5.18393	19.3775	10.0472	15.0678	3.95374	11.0919		6.35312	11.463	5.32302	11.5155	14.78	8.40824	10.5496	8.59768
7.27915	6.74553	8.09511	5.55205	9.99186	5.61139	10.7688	4.62658	7.11787	5.19883	6.60058	6.82398	9.29218	6.08368	8.90232	6.42655	7.16566	5.44891	8.10905	6.3485		5.44711	13.9223	7.36196	12.5741	5.25955	8.6819	6.97677	9.79814	8.72626	7.39222	5.88574	11.1665	6.41008	10.9628	5.16174	19.3845	10.0331	15.0557	3.95374	11.4065		6.28715	11.5933	5.29427	11.5324	15.1267	8.41162	10.5632	8.574
7.29508	6.66947	8.11622	5.55046	9.96478	5.63767	10.731	4.59551	7.11429	5.20679	6.59699	6.82478	9.22966	6.15536	9.02178	6.43611	7.16327	5.43935	8.10109	6.32341		5.45215	13.9122	7.36196	12.5267	5.29384	8.68492	7.00198	9.81931	8.7555	7.47893	5.88675	11.1655	6.42823	10.9235	5.14864	19.3916	10.028	15.0516	4.02231	11.6969		6.24148	11.71	5.29596	11.5527	15.3584	8.42008	10.5615	8.64843
7.35561	6.66111	8.08038	5.52298	9.94487	5.6536	10.7039	4.59551	7.11389	5.24223	6.59301	6.82398	9.19501	6.18961	9.10581	6.44487	7.16406	5.40112	8.09233	6.30908		5.47635	13.9122	7.36096	12.4612	5.31199	8.68492	7.01207	9.8294	8.76559	7.49406	5.91801	11.1715	6.45445	10.8509	5.15166	19.3976	10.0391	15.0486	4.07474	11.9177		6.21949	11.7523	5.29934	11.5628	15.4413	8.41839	10.5598	8.80235
7.39623	6.6627	8.031	5.51342	9.94606	5.64006	10.6971	4.59193	7.11628	5.22551	6.57987	6.82478	9.24121	6.20633	9.11616	6.44487	7.19075	5.38878	8.10388	6.3266		5.49248	13.9172	7.36096	12.4249	5.2898	8.68593	7.02114	9.8294	8.7787	7.49003	6.03094	11.1645	6.48571	10.7067	5.15065	19.3966	10.0452	15.0456	4.07071	12.1678		6.20934	11.7556	5.31456	11.5324	15.3162	8.42516	10.5615	8.90046
7.38588	6.66668	8.02463	5.51263	9.93412	5.63966	10.7027	4.59273	7.11707	5.23188	6.5735	6.82318	9.27267	6.20832	9.07674	6.42934	7.2234	5.3844	8.1202	6.31943		5.50055	13.9183	7.36398	12.3906	5.2646	8.68895	7.04534	9.82738	8.79181	7.4749	6.15295	11.1634	6.49579	10.5917	5.14964	19.3956	10.0472	15.0406	4.06365	12.3866		6.20934	11.7387	5.3264	11.4833	14.9525	8.42516	10.5801	8.96304
7.35243	6.64956	8.03857	5.50307	9.92814	5.65081	10.7027	4.58516	7.14455	5.23068	6.58106	6.82677	9.27904	6.22226	9.02776	6.41341	7.24013	5.37962	8.10467	6.3047		5.52878	13.9183	7.36297	12.3311	5.22426	8.70005	7.05845	9.81931	8.77265	7.43961	6.23866	11.1554	6.50386	10.4485	5.15368	19.3906	10.0452	15.0295	4.0576	12.4592		6.20765	11.759	5.34501	11.4495	14.8003	8.40993	10.6105	8.97319
7.39026	6.62009	8.07719	5.4967	9.93451	5.67112	10.7015	4.56804	7.25685	5.20918	6.56912	6.83433	9.27824	6.28837	9.01939	6.41301	7.25287	5.38639	8.06166	6.30151		5.55097	13.9102	7.36196	12.2696	5.14864	8.72727	7.05543	9.81125	8.76256	7.42247	6.32336	11.1211	6.51999	10.3558	5.15469	19.3875	10.0432	15.0577	4.05558	12.4229		6.20765	11.8081	5.37884	11.4258	14.8375	8.3964	10.6325	8.98672
7.45158	6.59221	8.0975	5.4955	9.94567	5.71612	10.6999	4.56804	7.4038	5.19683	6.54522	6.85783	9.28023	6.33815	9.00745	6.40823	7.25048	5.37723	8.03737	6.29673		5.55903	13.8779	7.36196	12.2252	5.06898	8.75651	7.05139	9.80822	8.75752	7.42045	6.37479	11.0908	6.52806	10.3305	5.1567	19.3875	10.0512	15.0779	4.05861	12.4622		6.20765	11.8165	5.37884	11.4326	14.9153	8.36595	10.6477	8.98841
7.46034	6.5962	8.12379	5.49988	9.98151	5.74678	10.6999	4.5549	7.46791	5.19524	6.53288	6.84588	9.33359	6.37877	8.95687	6.39987	7.2238	5.37882	8.04653	6.2816		5.58122	13.8174	7.36297	12.197	5.01251	8.77971	7.06148	9.78201	8.73433	7.42347	6.38185	11.0898	6.521	10.3195	5.15771	19.3886	10.0855	15.0748	4.06768	12.681		6.21273	11.8216	5.41605	11.4546	14.9796	8.32705	10.6613	8.98334
7.41256	6.55717	8.16799	5.51183	10.0018	5.74678	10.7067	4.55649	7.46074	5.19524	6.52929	6.83115	9.3989	6.40584	8.92183	6.40027	7.22101	5.37484	8.06007	6.28001		5.61752	13.6631	7.36196	12.1778	5.01453	8.79483	7.07862	9.74671	8.7061	7.45272	6.40403	11.0838	6.5089	10.3084	5.15872	19.3936	10.1319	15.0718	4.09491	12.926		6.24317	11.8351	5.47356	11.4867	15.0083	8.29322	10.6833	8.98672
7.32614	6.51098	8.20263	5.51342	10.007	5.7428	10.7349	4.54972	7.44322	5.19524	6.53567	6.81721	9.39253	6.38593	8.90749	6.40067	7.2234	5.39634	8.06326	6.27841		5.65483	13.3364	7.35995	12.1657	5.19099	8.79987	7.08265	9.73663	8.70509	7.62111	6.4847	11.0707	6.49176	10.3245	5.1567	19.4027	10.1853	15.0779	4.1423	12.9633		6.277	11.8301	5.50401	11.5341	15.0151	8.26785	10.7137	8.98503
7.27597	6.51934	8.26356	5.52378	10.0241	5.71572	10.7644	4.54534	7.43406	5.19444	6.54084	6.8415	9.36585	6.37518	8.92024	6.39469	7.2238	5.40789	8.06883	6.26408		5.69113	12.8544	7.35995	12.1476	5.45013	8.80592	7.09374	9.70134	8.69803	7.96193	6.56335	11.0707	6.49176	10.2075	5.1567	19.4168	10.2479	15.0849	4.20583	12.918		6.28884	11.803	5.526	11.5814	15.0218	8.23909	10.7408	8.97319
7.25685	6.50739	8.4117	5.60382	9.98549	5.65161	10.7656	4.5541	7.43645	5.19006	6.54005	6.90323	9.38576	6.38554	8.93696	6.36363	7.21743	5.40829	8.12498	6.24138		5.71936	12.4289	7.35995	12.1163	5.59836	8.83416	7.07156	9.6368	8.67383	8.39956	6.6541	11.0737	6.49075	9.99073	5.15267	19.4269	10.2862	15.0839	4.2502	12.8262		6.29561	11.7912	5.50232	11.5831	15.054	8.23064	10.7644	8.98672
7.25167	6.49186	8.49055	5.71373	9.91779	5.5847	10.766	4.54892	7.4257	5.18409	6.55279	6.90801	9.41244	6.41978	8.92063	6.29554	7.19592	5.4059	8.22812	6.23063		5.73449	12.2081	7.35793	12.0942	5.6881	8.84424	7.05845	9.60554	8.65769	9.15582	6.77208	11.0687	6.4968	9.63378	5.12444	19.4299	10.2862	15.0849	4.31675	12.7193		6.29223	11.7912	5.48709	11.5628	15.1064	8.24755	10.7746	9.06791
7.27079	6.47832	8.4563	5.7659	9.88354	5.56639	10.766	4.51985	7.39424	5.16418	6.59699	6.91119	9.41085	6.42177	8.88957	6.24377	7.17322	5.4067	8.29423	6.23421		5.75566	12.078	7.35289	12.077	5.73852	8.82811	7.07257	9.6005	8.64862	9.91612	6.82149	11.0717	6.49277	9.16389	5.07099	19.4299	10.2973	15.0829	4.42061	12.681		6.27024	11.8148	5.48202	11.5459	15.1216	8.26278	10.7966	9.13218
7.29787	6.47394	8.36033	5.77545	9.85885	5.61577	10.7648	4.50114	7.35043	5.13391	6.6619	6.93429	9.38297	6.42974	8.9055	6.22186	7.18119	5.34657	8.346	6.23779		5.77079	12.0064	7.35188	12.0538	5.74659	8.79382	7.09374	9.59748	8.62946	10.1047	6.83561	11.0656	6.47562	8.8513	5.00747	19.4259	10.3013	15.0839	4.47909	12.6578		6.26516	11.8656	5.47525	11.5341	15.1013	8.26108	10.822	9.19308
7.30862	6.49146	8.26834	5.77068	9.85965	5.68585	10.7557	4.49158	7.28353	5.12914	6.78575	6.93469	9.31129	6.45045	8.89515	6.28239	7.20508	5.29639	8.40573	6.26248		5.78188	12.0115	7.35188	12.0387	5.74659	8.74542	7.11492	9.6005	8.61736	10.1067	6.8951	11.0142	6.44941	8.73231	4.95806	19.4501	10.2973	15.0829	4.46497	12.6054		6.26685	11.9299	5.47356	11.5104	15.0591	8.27631	10.8236	9.25735
7.31141	6.57071	8.19706	5.77665	9.88513	5.69103	10.7409	4.50392	7.23415	5.13551	6.97013	6.9327	9.18545	6.4389	8.84298	6.4162	7.21862	5.29958	8.43321	6.28797		5.79801	11.8209	7.34986	12.0387	5.75264	8.71114	7.14114	9.60756	8.62644	10.139	6.98282	10.9658	6.42823	8.68089	4.93184	19.4954	10.3013	15.0829	4.51237	12.555		6.26516	11.9941	5.43973	11.4512	15.0506	8.28984	10.8186	9.21338
7.33769	6.57628	8.14131	5.79059	9.9158	5.66993	10.7126	4.58556	7.21623	5.14506	7.15451	6.93986	9.05364	6.42615	8.75179	6.43611	7.22101	5.30157	8.43161	6.28877		5.79196	11.5708	7.34785	12.0377	5.77885	8.69803	7.15727	9.61966	8.61837	10.4899	7.03828	10.9537	6.40403	8.67484	4.89957	19.5257	10.3033	15.0849	4.52951	12.5106		6.29053	12.0635	5.42789	11.397	15.0895	8.31352	10.8812	9.1491
7.37592	6.57111	8.11702	5.7655	9.98549	5.67231	10.6676	4.63175	7.2003	5.14586	7.28632	6.95301	8.9732	6.42177	8.68568	6.41899	7.2242	5.30077	8.45511	6.27403		5.7718	11.4115	7.34583	12.0185	5.82524	8.71114	7.16231	9.61664	8.56795	11.1645	7.09979	10.9436	6.37681	8.67484	4.86932	19.565	10.3003	15.0879	4.53959	12.4884		6.30745	12.1311	5.44142	11.37	15.1199	8.36257	10.986	9.14572
7.38189	6.57788	8.11742	5.742	10.0679	5.70377	10.6111	4.6206	7.16566	5.11599	7.34725	6.94424	8.91705	6.42376	8.6825	6.36921	7.24451	5.27289	8.48816	6.25571		5.78087	11.2723	7.34482	12.0095	5.86154	8.71719	7.16433	9.61865	8.5135	11.4266	7.16534	10.9356	6.36067	8.6587	4.88344	19.6003	10.2882	15.091	4.64144	12.5368		6.31083	12.1819	5.47694	11.3446	15.1419	8.39133	11.0418	9.16094
7.38946	6.58106	8.14171	5.74081	10.0938	5.72329	10.5506	4.61901	7.13619	5.05746	7.35919	6.92712	8.87484	6.44607	8.70121	6.35567	7.27397	5.18688	8.49613	6.21828		5.77583	11.1171	7.34886	12.0074	5.8686	8.71416	7.15929	9.60353	8.49636	11.4367	7.18248	10.9245	6.33446	8.6224	4.92478	19.6064	10.3003	15.089	4.66564	12.6336		6.30914	12.214	5.52092	11.3209	15.2045	8.39809	11.1078	9.19308
7.39782	6.58704	8.19706	5.74479	10.099	5.70139	10.4861	4.61065	7.14654	5.01604	7.33809	6.92911	8.82068	6.48589	8.72351	6.35527	7.2899	5.13391	8.48896	6.18841		5.7607	10.9961	7.35087	11.9822	5.87162	8.71215	7.15929	9.58941	8.50342	11.4246	7.1976	10.7712	6.2911	8.56594	4.97217	19.6094	10.3013	15.0859	4.69387	12.7808		6.29392	12.2394	5.53614	11.3159	15.3483	8.40993	11.2533	9.21507
7.4034	6.58186	8.24644	5.80452	10.1304	5.68984	10.4215	4.58755	7.27238	5.00011	7.3365	6.86102	8.77926	6.49106	8.73466	6.34173	7.3134	5.13073	8.45591	6.19917		5.74255	10.9265	7.35188	11.9459	5.88473	8.71215	7.15828	9.54605	8.54173	11.4246	7.2208	10.5121	6.30017	8.54173	5.06091	19.6164	10.2791	15.0829	4.72916	12.9412		6.27531	12.2445	5.53445	11.3159	15.4176	8.42516	11.4546	9.2675
7.43804	6.57708	8.25679	5.92359	10.1675	5.71214	10.3789	4.61941	7.45716	5.00091	7.4034	6.69854	8.76334	6.49385	8.73347	6.32381	7.33251	5.12993	8.4344	6.20912		5.72239	10.871	7.35591	11.9469	5.92103	8.71013	7.15324	9.37362	8.56291	11.4246	7.13912	10.2771	6.35664	8.56594	5.1446	19.6144	10.2418	15.0819	4.72916	12.9573		6.27193	12.2259	5.53107	11.3142	15.4244	8.42685	11.6829	9.37406
7.45397	6.58226	8.2548	6.02355	10.1659	5.72687	10.3626	4.6887	7.53362	5.0017	7.5603	6.5046	8.75457	6.49067	8.73307	6.32102	7.32535	5.13511	8.43759	6.19877		5.72642	10.7984	7.35491	11.957	5.97851	8.70811	7.15324	9.17296	8.5498	11.4246	7.01005	10.0472	6.39294	8.59417	5.17586	19.6043	10.1874	15.0829	4.72916	12.9805		6.28208	12.2174	5.53107	11.3091	15.421	8.42685	11.8098	9.41466
7.45557	6.59341	8.25162	6.07651	10.1424	5.72568	10.3642	4.7333	7.54039	5.00489	7.80959	6.39629	8.75856	6.46916	8.7271	6.27244	7.2899	5.14148	8.44436	6.17846		5.7355	10.7299	7.35894	11.9842	6.06119	8.71013	7.15223	9.11246	8.52459	11.4377	6.96165	9.87376	6.45042	8.52661	5.24443	19.5943	10.1148	15.0809	4.72916	13.2023		6.28039	12.2157	5.54798	11.3057	15.4109	8.42685	11.7962	9.41297
7.44242	6.66031	8.25202	6.04386	10.1097	5.71771	10.3698	4.7333	7.53083	5.00608	8.03259	6.39788	8.8159	6.44965	8.70519	6.27602	7.27039	5.14785	8.44038	6.18523		5.69012	10.6966	7.33978	12.0377	6.20135	8.71114	7.14416	9.11246	8.51048	11.4599	6.95762	9.82839	6.52503	8.41166	5.35333	19.5862	10.0805	15.0748	4.73118	13.4302		6.28715	12.2123	5.57166	11.2888	15.3855	8.42854	11.9282	9.46371
7.42331	6.71327	8.25241	5.96421	10.0894	5.72169	10.3881	4.70981	7.47787	4.99653	8.13056	6.41899	8.90232	6.45084	8.68927	6.34611	7.25805	5.17453	8.44356	6.17647		5.61046	10.6794	7.29945	12.0659	6.33647	8.7192	7.13105	9.01062	8.50241	11.4417	6.95762	9.82839	6.51394	8.36527	5.43904	19.5862	10.0754	15.0738	4.74025	13.5442		6.28377	12.2174	5.56828	11.2634	15.3703	8.48605	11.9806	9.54321
7.4026	6.73677	8.25241	5.9439	10.0787	5.75196	10.4323	4.69627	7.38229	4.9802	8.17556	6.36085	8.96404	6.43173	8.69126	6.34332	7.2449	5.22869	8.4348	6.1701		5.57819	10.6704	7.2944	12.0841	6.34454	8.73836	7.12803	8.58207	8.50745	11.4206	6.97476	9.82738	6.41109	8.3562	5.50156	19.5882	10.0492	15.0758	4.76345	13.5986		6.27869	12.2242	5.52769	11.2685	15.3618	8.61629	11.984	9.54998
7.40619	6.73239	8.26555	5.95107	10.0699	5.75634	10.502	4.68392	7.26601	4.98657	8.2094	6.24536	8.99152	6.3935	8.65542	6.33297	7.26362	5.23347	8.42206	6.15656		5.5671	10.6895	7.30449	12.1153	6.46151	8.75853	7.14013	8.06277	8.52258	11.4639	6.99997	9.80016	6.36571	8.35922	5.5429	19.5882	9.99779	15.0758	4.76345	13.643		6.277	12.2242	5.5057	11.2837	15.3737	8.70932	11.9891	9.4857
7.42291	6.73637	8.29343	5.95306	10.0683	5.76351	10.4896	4.70622	7.1342	5.04392	8.24644	6.14023	8.99869	6.33974	8.57498	6.33177	7.33968	5.30197	8.43241	6.147		5.57113	10.7137	7.31558	12.1405	6.7388	8.78475	7.15424	7.66749	8.50543	11.7906	7.01106	9.7447	6.39899	8.36527	5.56206	19.5862	9.94838	15.0698	4.7584	13.6974		6.277	12.2225	5.54968	11.2567	15.394	8.7533	11.9908	9.4265
7.44402	6.74911	8.30737	5.94868	10.0783	5.7663	10.408	4.74724	7.07884	5.09847	8.28148	6.07333	8.99869	6.29633	8.53037	6.33217	7.48583	5.4055	8.43122	6.1462		5.57618	10.7178	7.3297	12.1617	6.84367	8.79584	7.16433	7.35692	8.4772	12.2757	6.99997	9.65697	6.46554	8.35317	5.57718	19.5892	9.88889	15.0688	4.72513	13.7731		6.277	12.2208	5.6241	11.2161	15.4007	8.79051	11.9908	9.4062
7.4468	6.72841	8.30378	6.00682	10.1169	5.75435	10.2913	4.74724	7.13937	5.10046	8.29463	6.06815	9.00625	6.28319	8.52599	6.3481	7.62561	5.40431	8.42524	6.15018		5.58223	10.7188	7.35289	12.1879	6.83561	8.7666	7.15324	7.2339	8.45905	12.6387	6.99795	9.51378	6.60671	8.2957	5.58525	19.5963	9.81326	15.0698	4.68278	13.8688		6.26516	12.2174	5.64271	11.1941	15.4041	8.80912	12.0178	9.40282
7.43645	6.71726	8.29024	6.16014	10.2041	5.7209	10.177	4.73927	7.25207	5.08215	8.29224	6.06337	9.01262	6.29912	8.53396	6.40186	7.67459	5.40988	8.39259	6.16492		5.60744	10.6704	7.37104	12.2152	6.82956	8.71114	7.15122	7.26113	8.46107	12.8716	7.01711	9.49765	6.80233	8.21705	5.58122	19.5953	9.76083	15.0678	4.65152	13.9193		6.22795	12.2089	5.63594	11.1907	15.4075	8.80066	12.1142	9.41635
7.38269	6.71447	8.27033	6.21908	10.316	5.71492	10.0994	4.73848	7.41057	5.07737	8.29662	6.06576	9.01103	6.32978	8.51524	6.49226	7.67857	5.40789	8.38343	6.16492		5.6397	10.4757	7.36096	12.2504	6.82855	8.68694	7.15424	7.33373	8.46107	12.9886	7.04131	9.42908	6.99493	8.26444	5.57618	19.5882	9.7689	15.0678	4.60917	13.887		6.22288	12.2089	5.63425	11.1873	15.4126	8.79897	12.2292	9.41635
7.32574	6.71447	8.23728	6.21828	10.3929	5.83798	10.0663	4.74126	7.56508	5.08175	8.29701	6.0566	8.99829	6.35248	8.44038	6.50938	7.65587	5.37882	8.37586	6.15058		5.65584	10.1672	7.3418	12.2948	6.83056	8.67282	7.18449	7.39121	8.44392	13.0289	7.05038	9.28892	7.16836	8.2957	5.56508	19.5852	9.85259	15.0678	4.55573	13.8457		6.22118	12.1937	5.64947	11.1873	15.3804	8.80912	12.3307	9.41466
7.32415	6.71248	8.21618	6.2589	10.4415	5.96103	10.1412	4.74007	7.67499	5.0925	8.30378	5.99727	8.99869	6.37359	8.36511	6.52213	7.62123	5.36688	8.33564	6.11872		5.66693	9.86671	7.34482	12.3251	6.84266	8.63954	7.21172	7.37306	8.42174	13.0531	7.05139	9.17599	7.246	8.24427	5.54391	19.5872	9.97863	15.0698	4.56178	13.8245		6.25163	12.1599	5.69345	11.1839	15.2417	8.80235	12.4271	9.41297
7.33092	6.70013	8.20662	6.41978	10.4713	5.99368	10.1965	4.74485	7.77176	5.10365	8.33923	5.91324	9.00824	6.37558	8.32529	6.53806	7.59932	5.35772	8.27432	6.09284		5.69315	9.58437	7.35087	12.3341	6.84569	8.6103	7.22685	7.40331	8.41771	13.0672	7.05946	9.01566	7.24298	8.3078	5.52374	19.5882	10.1027	15.0698	4.61522	13.8104		6.28039	12.1294	5.75603	11.1789	15.0692	8.78205	12.5134	9.4468
7.33132	6.685	8.15047	6.67783	10.4773	5.99129	10.1985	4.74764	7.85618	5.12794	8.39139	5.87581	9.02178	6.36124	8.29582	6.53527	7.5834	5.34975	8.2564	6.08647		5.7234	9.22439	7.36902	12.3432	6.83863	8.60526	7.22785	7.41541	8.41771	13.0642	7.08366	8.91079	7.26617	8.38947	5.5066	19.5892	10.1813	15.0708	4.64648	13.8043		6.28377	12.1125	5.8423	11.1789	14.9474	8.7922	12.5557	9.51276
7.33371	6.67823	7.96609	6.79889	10.4769	6.09483	10.1942	4.74525	7.92109	5.16657	8.4344	5.86904	9.02776	6.40823	8.26794	6.54323	7.59455	5.3617	8.25361	6.09523		5.75869	8.98137	7.44868	12.3583	6.82451	8.60929	7.21777	7.41541	8.41267	13.0561	7.08568	8.91886	7.26617	8.49132	5.49853	19.5912	10.2448	15.0728	4.64244	13.8043		6.28377	12.1092	5.94379	11.1805	14.8747	8.7736	12.5371	9.60918
7.37552	6.68062	7.69211	6.7969	10.4745	6.25014	10.195	4.74405	7.94936	5.19285	8.44874	5.86028	9.02178	6.44726	8.23529	6.53049	7.62362	5.34776	8.25162	6.14222		5.82322	9.01465	7.52935	12.3694	6.80737	8.6466	7.21979	7.38919	8.40561	13.037	7.07761	8.93902	7.38314	8.58409	5.48946	19.5922	10.3295	15.0769	4.69387	13.8174		6.28377	12.1058	6.0605	11.1586	14.8425	8.73977	12.5929	9.67684
7.48304	6.7077	7.42052	6.7961	10.4586	6.27443	10.1902	4.73888	7.90636	5.23148	8.44953	5.82922	9.01581	6.42496	8.19348	6.53606	7.63915	5.31511	8.25361	6.15018		5.88977	8.90575	7.58985	12.3835	6.78216	8.70105	7.2208	7.34986	8.40359	13.0097	7.05744	8.94407	7.64733	8.60223	5.48139	19.5922	10.4213	15.0809	4.83302	13.8487		6.31422	12.0516	6.18059	11.0503	14.8882	8.73131	12.7062	9.71236
7.56826	6.72602	7.23734	6.77858	10.4375	6.27563	10.1719	4.78746	7.86175	5.23666	8.44953	5.86386	9.0174	6.3716	8.17795	6.5062	7.64592	5.31431	8.24325	6.14501		5.92809	8.63652	7.65741	12.3977	6.74082	8.72324	7.2339	7.33676	8.41166	12.9936	7.0645	8.94306	7.87017	8.6103	5.48442	19.5933	10.4768	15.0799	4.89756	13.8537		6.39202	11.9789	6.26685	10.942	14.9965	8.73638	12.943	9.7225
7.58578	6.71288	7.16008	6.74911	10.4355	6.27363	10.1408	4.83564	7.85737	5.19644	8.44794	5.86466	8.99032	6.36363	8.18272	6.45244	7.66224	5.28843	8.19587	6.11554		5.97145	8.31889	7.69674	12.4148	6.71763	8.74945	7.24701	7.40028	8.43182	12.9886	7.12399	8.94003	8.02546	8.70105	5.49148	19.5862	10.51	15.0799	4.88243	13.8305		6.50366	11.9755	6.27193	10.9336	15.0878	8.75499	13.4014	9.7225
7.57981	6.69894	7.1569	6.73836	10.4582	6.2816	10.0946	4.8464	7.87131	5.16219	8.44834	5.85152	8.97678	6.38792	8.16839	6.45881	7.67339	5.20201	8.08715	6.0793		6.01481	7.95891	7.69573	12.4521	6.71561	8.78475	7.27827	7.48397	8.453	12.9855	7.20063	8.91886	8.12125	8.8392	5.48139	19.5731	10.5272	15.0869	4.87638	13.8537		6.60684	11.9654	6.21442	10.9285	15.147	8.77698	13.5976	9.72589
7.57185	6.69257	7.13539	6.76703	10.5143	6.27921	10.0703	4.84361	7.87888	5.15781	8.45272	5.85789	8.9732	6.42775	8.19069	6.42854	7.67419	5.12595	7.90516	6.05421		6.0501	7.68968	7.69674	12.5035	6.72469	8.76861	7.34684	7.4749	8.47518	12.9855	7.25306	8.87751	8.16058	8.92894	5.47937	19.5731	10.5272	15.1	4.91167	13.8799		6.69141	11.9671	6.15353	10.8879	15.0269	8.7719	13.6078	9.72081
7.57384	6.70411	7.07725	6.79571	10.5534	6.3254	10.0663	4.8456	7.87848	5.16298	8.47064	5.93116	8.95568	6.44407	8.22852	6.42177	7.6722	5.07657	7.7399	6.01638		6.10052	7.67153	7.69875	12.5247	6.7267	8.7313	7.39222	7.43759	8.48728	12.9815	7.31558	8.83416	8.17167	9.02574	5.48442	19.5852	10.5463	15.1242	4.93688	13.8567		6.76414	11.9688	6.11462	10.8186	14.8256	8.79558	13.919	9.68698
7.57344	6.71965	7.02031	6.79571	10.5498	6.37956	10.0711	4.8456	7.86175	5.17055	8.49732	5.9682	8.93417	6.44328	8.23808	6.42894	7.68415	5.05945	7.63556	6.00881		6.17816	7.73102	7.70077	12.5277	6.71057	8.71013	7.40028	7.40331	8.49938	12.9613	7.39121	8.80693	8.18579	9.09532	5.48542	19.5862	10.6159	15.1484	4.96612	13.8144		6.79966	11.9671	6.10955	10.7509	14.7783	8.7922	14.5144	9.65485
7.59255	6.71805	7.00199	6.79969	10.5263	6.39987	10.0659	4.8448	7.85817	5.17015	8.5013	5.95625	8.95528	6.46239	8.25321	6.43292	7.70804	5.05825	7.52087	5.99727		6.2195	7.75522	7.69976	12.5247	6.70049	8.694	7.40129	7.38012	8.54375	12.9472	7.43557	8.80794	8.23217	9.14372	5.49753	19.5832	10.7046	15.1726	5.01856	13.771		6.77598	11.9671	6.11801	10.7002	14.9051	8.7922	14.9999	9.65315
7.62919	6.72761	7.00398	6.80805	10.4932	6.4162	10.0556	4.801	7.84742	5.17294	8.49135	5.94151	8.98236	6.46876	8.26755	6.4381	7.74707	5.05746	7.40459	5.97098		6.23665	7.79253	7.70077	12.5156	6.71057	8.67484	7.41238	7.34684	8.6103	12.9291	7.49708	8.78475	8.28763	9.16288	5.44711	19.6003	10.7611	15.1999	5.07099	13.7357		6.7337	11.9721	6.12477	10.6545	15.0489	8.79389	15.0844	9.64977
7.58658	6.74633	6.98407	6.81602	10.4657	6.46199	10.0651	4.71697	7.81397	5.16657	8.47781	5.9228	8.98435	6.48868	8.25321	6.42576	7.77614	5.07179	7.34247	5.97098		6.27395	7.84496	7.70178	12.5045	6.69545	8.63349	7.40028	7.30146	8.60223	12.8968	7.61708	8.72929	8.29872	9.1649	5.43904	19.5872	10.8105	15.215	5.13654	13.7156		6.66604	11.984	6.12815	10.6257	15.032	8.78544	15.0844	9.61594
7.45238	6.75429	6.87535	6.81801	10.4578	6.47713	10.0966	4.5983	7.79963	5.05546	8.46586	5.92718	9.00068	6.50142	8.24684	6.40624	7.79246	5.09648	7.30862	5.98054		6.31227	7.86412	7.70178	12.4834	6.65612	8.54577	7.38012	7.24399	8.51552	12.8807	7.68262	8.75046	8.29872	9.14775	5.56408	19.5267	10.9093	15.217	5.23838	13.7015		6.57639	12.0009	6.13154	10.619	15.0726	8.78544	15.0658	9.52799
7.29787	6.75827	6.71487	6.78854	10.4578	6.47235	10.1328	4.43025	7.79724	4.90932	8.44993	5.92081	9.03214	6.4839	8.24086	6.40505	7.81755	5.10007	7.28194	5.98333		6.33546	7.81169	7.7048	12.4612	6.60974	8.48728	7.40331	7.20668	8.34914	12.8706	7.72094	8.85432	8.3078	9.13565	5.74054	19.5025	11.0233	15.22	5.30191	13.6884		6.52226	12.011	6.12815	10.6207	15.0997	8.79051	15.0083	9.45018
7.16446	6.7523	6.62646	6.78336	10.4454	6.45562	10.1922	4.35817	7.79047	4.88702	8.41369	5.93355	9.03214	6.4831	8.22494	6.40505	7.84822	5.10245	7.27477	5.97895		6.39193	7.77135	7.70581	12.4632	6.58251	8.48224	7.46381	7.19155	8.13638	12.8544	7.79253	8.87852	8.31788	9.11246	5.8444	19.5015	11.0848	15.2352	5.36442	13.6853		6.595	12.0212	6.11124	10.5868	15.1318	8.79728	15.0438	9.44849
7.11588	6.72761	6.61611	6.78057	10.4132	6.45961	10.2467	4.36614	7.77972	4.87586	8.346	5.92559	9.03572	6.47792	8.19029	6.40545	7.87131	5.11679	7.27278	5.98731		6.48672	7.86916	7.71892	12.4793	6.57041	8.48728	7.51725	7.17945	7.97605	12.8555	7.84194	8.82508	8.33099	9.07213	5.89683	19.5116	11.0969	15.2422	5.54895	13.6833		6.7134	12.028	6.08756	10.3551	15.2451	8.81588	15.262	9.45695
7.13061	6.73119	6.63204	6.7746	10.3973	6.47314	10.23	4.28132	7.77375	4.85675	8.28188	5.9001	9.10302	6.46637	8.13852	6.415	7.87967	5.12077	7.27676	6.02435		6.54722	8.16965	7.7532	12.4985	6.55226	8.48829	7.54347	7.16534	7.88328	12.8676	7.8732	8.7303	8.34309	9.04692	5.91902	19.5196	11.0697	15.2432	5.79499	13.6763		6.76922	11.9468	6.08249	9.94578	15.4024	8.81757	15.487	9.46033
7.13778	6.69336	6.62566	6.74274	10.4028	6.47474	10.2061	4.23313	7.76857	4.86272	8.26635	5.89333	9.18187	6.49704	8.12737	6.45363	7.86056	5.09409	7.28712	6.05819		6.57343	8.62341	7.78446	12.5207	6.51394	8.49636	7.55456	7.15727	7.8248	12.8726	7.94782	8.6345	8.35116	9.06103	5.92103	19.5257	11.0424	15.2483	5.9049	13.6813		6.80474	11.825	6.08079	9.41466	15.5445	8.82096	15.5902	9.4654
7.133	6.63841	6.61929	6.69814	10.4028	6.46279	10.1965	4.23353	7.77295	4.85635	8.28387	5.94351	9.23603	6.48708	8.12737	6.47753	7.83906	5.06622	7.25486	6.07373		6.58654	9.16086	7.81875	12.5308	6.48268	8.48224	7.55355	7.14618	7.78446	12.8998	8.02848	8.5256	8.35519	9.17195	5.92002	19.5328	11.0616	15.2614	5.9291	13.6984		6.92652	11.825	6.04696	8.80912	15.7559	8.81757	15.6443	9.47217
7.15331	6.6177	6.62487	6.60336	10.412	6.4381	10.23	4.23194	7.78211	4.87945	8.30299	6.0562	9.287	6.48549	8.12777	6.50062	7.83189	5.06542	7.14535	6.08965		6.58554	9.86066	7.86412	12.5298	6.47865	8.44191	7.52633	7.12702	7.75925	12.9391	8.07084	8.37838	8.36729	9.41295	5.92002	19.5287	11.1312	15.2775	5.94826	13.7005		7.01955	11.8165	6.01483	8.44038	16.0993	8.79558	15.6984	9.46879
7.20229	6.61969	6.61412	6.54801	10.4932	6.44288	10.3152	4.22517	7.79207	4.90613	8.30538	6.07213	9.36107	6.46757	8.12737	6.54363	7.83149	5.06741	6.9777	6.08806		6.5694	10.5756	7.90143	12.5277	6.47764	8.40258	7.47591	7.12399	7.73707	12.9623	8.12125	8.37031	8.37334	9.78806	5.93212	19.5186	11.2179	15.2916	5.96439	13.6954		7.07875	11.7776	6.00806	8.34904	16.3598	8.79051	15.7069	9.47217
7.22977	6.595	6.6181	6.53885	10.6473	6.44925	10.4375	4.22517	7.81038	4.90494	8.29502	6.07054	9.44629	6.3943	8.12498	6.55717	7.83945	5.05546	6.87137	6.14979		6.54621	10.8045	7.93471	12.5177	6.47663	8.34006	7.38516	7.12601	7.72396	12.9805	8.17671	8.37334	8.37737	10.2428	5.96137	19.5086	11.3218	15.3098	5.9654	13.7095		7.08383	11.6897	6.00299	8.34058	16.4444	8.79897	15.6409	9.51445
7.24252	6.3481	6.62328	6.41062	10.7258	6.44487	10.5092	4.22238	7.83906	4.891	8.29821	6.06815	9.51558	6.30669	8.13334	6.57111	7.83468	5.01883	6.8638	6.16572		6.5331	10.7167	7.95689	12.5015	6.47764	8.16461	7.2944	7.12601	7.71287	13.0057	8.23318	8.3683	8.37838	10.4515	5.9775	19.5035	11.4407	15.341	5.97952	13.7045		7.33924	11.5053	5.981	8.34397	16.4613	8.80743	15.5952	9.53137
7.2234	6.14063	6.62407	6.27921	10.7274	6.48907	10.5315	4.21402	7.86892	4.8902	8.29821	6.06934	9.56815	6.21032	8.1664	6.58903	7.83667	5.01723	6.86301	6.147		6.521	10.6492	7.92664	12.4824	6.47865	7.95185	7.246	7.12702	7.68464	13.037	8.3199	8.29671	8.37636	10.4586	5.98758	19.5075	11.5496	15.3622	6.04103	13.6833		7.71474	11.2719	5.94886	8.30844	16.4748	8.80912	15.6375	9.51784
7.17999	6.19678	6.64239	6.22027	10.7122	6.58425	10.5323	4.23194	7.86534	4.89817	8.29343	6.12549	9.5797	6.12072	8.19268	6.54761	7.83667	5.03436	6.86181	6.1458		6.51193	10.6179	7.88731	12.444	6.47663	7.83992	7.2208	7.12198	7.65943	13.0753	8.42174	8.27553	8.36628	10.4546	6.00372	19.5146	11.6585	15.3531	6.11464	13.6702		7.89742	11.0249	5.91841	8.2966	16.4748	8.81419	16.035	9.4857
7.16367	6.13226	6.65712	6.22027	10.7095	6.6189	10.5518	4.21959	7.7841	4.89418	8.29463	6.15297	9.56576	6.14541	8.20064	6.52452	7.81875	5.03436	6.80646	6.16253		6.51092	10.6058	7.9095	12.3876	6.47462	7.77337	7.21575	7.12198	7.65136	13.1176	8.52258	8.33502	8.36124	10.4384	6.04506	19.5146	11.7916	15.339	6.1469	13.6692		7.97015	10.8778	5.89304	8.2983	16.4748	8.85309	16.7319	9.47048
7.17641	6.09722	6.6623	6.21709	10.7298	6.6189	10.6179	4.17977	7.61127	4.88582	8.29383	6.17049	9.55421	6.13346	8.19746	6.5281	7.79525	4.88144	6.71009	6.18682		6.51394	10.5645	7.96092	12.3321	6.47562	7.74715	7.21172	7.12601	7.63724	13.158	8.67585	8.33704	8.36426	10.4284	6.09245	19.5338	11.951	15.332	6.17816	13.6672		8.01244	10.8524	5.88966	8.21542	16.4866	8.95796	17.2224	9.45695
7.19473	6.1235	6.65235	6.2147	10.7608	6.61929	10.686	4.18335	7.46353	4.88502	8.29821	6.17328	9.53231	6.11116	8.20781	6.50221	7.79326	4.72056	6.64279	6.20076		6.51898	10.4848	8.0063	12.2182	6.46756	7.73909	7.20164	7.13206	7.61204	13.2013	8.8029	8.35418	8.36527	10.4314	6.12674	19.5559	12.0982	15.3118	6.25278	13.6581		8.0395	10.8575	5.90319	8.03443	16.6237	9.07468	17.5083	9.41466
7.19632	6.1239	6.64836	6.21828	10.7903	6.58425	10.7561	4.18813	7.37672	4.85994	8.31135	6.14501	9.50722	6.14381	8.22613	6.49863	7.79246	4.72135	6.61412	6.30589		6.51999	10.4364	8.03353	12.077	6.4605	7.7411	7.17643	7.14416	7.5838	13.2517	8.83819	8.3199	8.36426	10.5443	6.14993	19.5459	12.2172	15.3078	6.30824	13.651		8.06995	10.8727	5.90488	7.78578	16.9687	9.19139	17.6233	9.3673
7.18039	6.18284	6.64996	6.20992	10.7987	6.4385	10.8815	4.18813	7.3353	4.78786	8.33405	6.13147	9.49926	6.19996	8.28865	6.49943	7.79047	4.71857	6.58823	6.38315		6.51898	10.4798	8.03554	12.0538	6.48369	7.76228	7.11895	7.14517	7.54548	13.283	8.84525	8.25234	8.36326	10.874	6.16505	19.5267	12.321	15.3461	6.32941	13.647		8.08856	10.8761	5.90827	7.31387	17.2867	9.3081	17.6064	9.33347
7.1561	6.21111	6.68181	6.21549	10.7947	6.28279	11.0683	4.17977	7.33251	4.75321	8.36511	6.1251	9.49089	6.19718	8.47661	6.50022	7.78609	4.70781	6.55239	6.40146		6.50285	10.6512	8.02344	12.0538	6.50184	7.84194	7.05643	7.16836	7.49406	13.3052	8.87449	8.11117	8.37435	11.2794	6.17514	19.5146	12.4269	15.4106	6.37176	13.641		8.09025	10.871	5.93533	6.53241	17.5252	9.36053	17.6081	9.30979
7.1553	6.22545	6.82279	6.24297	10.7895	6.26487	11.2833	4.18933	7.33291	4.75321	8.3906	6.09881	9.48054	6.19678	8.70719	6.50022	7.74269	4.70184	6.53925	6.40346		6.46252	10.9285	8.00832	12.0548	6.50688	7.91051	7.03526	7.24903	7.45574	13.3495	8.8997	7.92967	8.38141	11.4902	6.17413	19.4884	12.5328	15.462	6.44033	13.6279		8.08856	10.8913	5.94717	5.84737	17.6707	9.35546	17.6132	9.30302
7.17641	6.23102	7.02708	6.28439	10.7811	6.30908	11.4693	4.20207	7.33371	4.75401	8.41409	6.09085	9.48094	6.17089	8.84656	6.50221	7.69092	4.70463	6.54204	6.3927		6.37378	11.2855	8.01134	12.0518	6.50588	7.94681	7.02719	7.2934	7.44062	13.4131	8.91886	7.88429	8.36931	11.5587	6.19228	19.4622	12.6387	15.4983	6.49579	13.6137		8.08856	10.9556	5.94379	5.55306	17.7265	9.34023	17.6233	9.30133
7.15172	6.22704	7.19353	6.27005	10.7656	6.30031	11.5644	4.20884	7.3353	4.71578	8.43838	6.08965	9.47218	6.12151	8.93258	6.50421	7.63397	4.69905	6.52372	6.39708		6.27295	11.6999	8.07487	12.0478	6.51495	8.02647	7.01711	7.32264	7.42247	13.4564	8.94911	7.90345	8.36527	11.6091	6.23564	19.4823	12.7677	15.5135	6.62688	13.6077		8.08686	10.9826	5.97423	5.47525	17.7265	9.33009	17.6656	9.29795
7.07088	6.22027	7.34088	6.21788	10.7421	6.27045	11.5943	4.21521	7.33729	4.6883	8.46068	6.07811	9.45585	6.09443	8.9732	6.50221	7.54158	4.70463	6.51814	6.41421		6.24975	12.1184	8.212	12.0044	6.51394	8.04462	6.99089	7.35188	7.39322	13.4837	8.96222	7.90042	8.37939	11.6364	6.25883	19.4894	12.9028	15.5236	6.87191	13.5936		8.07333	10.9826	6.00637	5.45326	17.6605	9.33685	17.7451	9.30471
6.96575	6.21748	7.43366	6.21788	10.7306	6.26328	11.617	4.2164	7.35243	4.67795	8.46865	6.0793	9.44669	6.07731	8.96444	6.50142	7.46433	4.74565	6.51376	6.41301		6.24774	12.4319	8.38141	11.9681	6.51394	8.04058	6.94753	7.35995	7.35087	13.4937	8.90676	7.91757	8.39855	11.6091	6.26085	19.3664	13.0047	15.5367	6.98887	13.5492		8.05473	11.0165	6.02159	5.43804	17.5962	9.32839	17.8398	9.32332
6.92473	6.23819	7.43167	6.23819	10.731	6.26886	11.6405	4.22079	7.37035	4.65206	8.46984	6.10399	9.41921	6.06098	8.97838	6.51456	7.43287	4.77989	6.49664	6.40067		6.24774	12.5701	8.54678	11.956	6.51596	8.04159	6.92232	7.35591	7.30751	13.4958	8.84323	7.99218	8.42477	11.5859	6.25984	19.2665	13.0965	15.5528	6.99593	13.5069		8.0395	11.1298	6.02159	5.38222	17.581	9.31994	17.8652	9.34869
6.94265	6.26766	7.4257	6.25532	10.7314	6.27363	11.6409	4.26499	7.37035	4.65127	8.46706	6.10479	9.3766	6.08368	9.01979	6.53726	7.40897	4.78467	6.48668	6.37916		6.24673	12.56	8.65467	11.951	6.50386	8.05067	6.95762	7.34886	7.28835	13.4958	8.81701	8.0063	8.45098	11.592	6.25782	19.2847	13.1943	15.5609	6.99694	13.4897		8.03105	11.2973	6.0199	5.36362	17.5827	9.31825	17.8652	9.36053
6.96575	6.19837	7.46552	6.25571	10.7365	6.2804	11.674	4.30362	7.3584	4.66401	8.44993	6.11514	9.32682	6.09881	9.11298	6.55797	7.37512	4.78228	6.44567	6.3708		6.2427	12.5167	8.69299	11.95	6.50487	8.0668	7.03223	7.35591	7.28835	13.5028	8.80693	7.96899	8.47317	11.598	6.25681	19.2998	13.2759	15.5659	7.00602	13.4736		8.02597	11.414	6.02667	5.37207	17.6013	9.31825	17.8652	9.35038
6.97132	6.07492	7.4703	6.27722	10.758	6.28001	11.76	4.29406	7.31778	4.63175	8.42604	6.15775	9.25833	6.09005	9.24439	6.56752	7.34804	4.78826	6.37478	6.44726		6.23564	12.5045	8.7061	11.9489	6.51999	8.0547	7.10484	7.35894	7.27525	13.5119	8.81298	7.81471	8.48527	11.6081	6.2548	19.205	13.3445	15.574	7.00703	13.4554		8.02259	11.4562	6.02836	5.36192	17.6977	9.31317	17.8635	9.32501
6.94743	6.01877	7.43884	6.29912	10.7776	6.28279	11.8492	4.29525	7.25526	4.62419	8.41449	6.19558	9.18028	6.12669	9.33638	6.53806	7.35681	4.85117	6.30589	6.58266		6.19429	12.5267	8.71517	11.9278	6.52705	8.03655	7.14114	7.32869	7.22483	13.5149	8.81399	7.68161	8.52358	11.6112	6.2548	18.9812	13.4433	15.5931	7.01005	13.4474		8.01921	11.4968	6.01144	5.36362	17.8804	9.29795	17.8398	9.29287
6.89248	6.00762	7.42769	6.27443	10.7943	6.282	11.9304	4.31915	7.23296	4.62419	8.40454	6.18841	9.12014	6.26527	9.37581	6.49186	7.39623	4.94675	6.22545	6.69097		6.17614	12.5489	8.7303	11.9046	6.55528	8.06983	7.14315	7.31861	7.14819	13.5119	8.78676	7.54952	8.56896	11.5849	6.25681	18.7311	13.5553	15.6224	7.06047	13.4403		8.01751	11.5425	6.1383	5.37884	18.058	9.27088	17.8128	9.25566
6.79969	5.95625	7.42809	6.22465	10.8078	6.27841	11.9902	4.32074	7.23057	4.621	8.37825	6.17248	9.08908	6.40744	9.36187	6.48111	7.41057	4.96467	6.1693	6.70173		6.17009	12.5499	8.80391	11.8995	6.62688	8.10613	7.15122	7.40936	7.07559	13.5018	8.68089	7.2944	8.63954	11.5557	6.26286	18.6444	13.645	15.6304	7.2087	13.4373		8.00737	11.5611	6.42923	5.36362	18.1426	9.26074	17.8111	9.25566
6.7292	5.95505	7.42888	6.19598	10.817	6.27921	12.0037	4.31198	7.23256	4.60985	8.33047	6.18125	9.0863	6.44965	9.33519	6.4831	7.39265	5.00449	6.17886	6.68819		6.16707	12.5489	8.94709	11.8975	6.73981	7.98815	7.17542	7.51423	7.03526	13.4907	8.63148	6.95661	8.72324	11.5476	6.26488	18.6343	13.7216	15.6042	7.34381	13.4342		8.00398	11.5645	6.60684	5.36362	18.1646	9.25059	17.8178	9.2489
6.6627	5.90129	7.44601	6.20355	10.8289	6.28478	11.9627	4.31556	7.23893	4.61582	8.27949	6.18523	9.07435	6.4385	9.32005	6.47792	7.36158	5.21276	6.19678	6.67305		6.17009	12.56	9.07717	11.8864	6.91325	7.79253	7.1966	7.52733	7.01509	13.4796	8.63249	6.7146	8.77769	11.5396	6.2558	18.6323	13.7821	15.5518	7.40028	13.4252		8.00398	11.5628	6.62037	5.34163	18.1646	9.26581	17.8144	9.17447
6.57907	5.84554	7.45477	6.20713	10.8361	6.3031	11.9185	4.31118	7.25605	4.61343	8.23569	6.18364	9.05285	6.46399	9.3089	6.48031	7.33451	5.44891	6.21071	6.70411		6.17312	12.6286	9.16389	11.8511	7.07055	7.72497	7.16735	7.46078	7.02013	13.4756	8.6224	6.5694	8.81903	11.5174	6.24169	18.597	13.8204	15.4752	7.42751	13.4332		7.99045	11.556	6.58992	5.36531	18.2288	9.3081	17.7941	9.06284
6.51257	5.84992	7.47149	6.20036	10.8074	6.28678	11.897	4.28968	7.29548	4.61264	8.17715	6.18284	9.06559	6.60814	9.33519	6.47434	7.31101	5.53094	6.16412	6.74792		6.17413	12.7516	9.21632	11.832	7.11089	7.72497	7.13811	7.42045	7.0887	13.4726	8.60627	6.49579	8.87046	11.4992	6.22455	18.232	13.8416	15.3713	7.45977	13.4786		7.96	11.5611	6.57132	5.47525	18.4284	9.34193	17.7772	8.98672
6.48907	5.83718	7.51371	6.20235	10.7385	6.28518	11.8854	4.29127	7.3349	4.61383	8.10427	6.17806	9.05006	6.71128	9.38457	6.45682	7.29707	5.52218	5.93036	6.7304		6.16203	12.8151	9.24355	11.8411	7.08971	7.71993	7.15828	7.41238	7.12803	13.4716	8.62139	6.44638	8.91382	11.4801	6.2064	17.4233	13.8477	15.2412	7.49103	13.5139		7.93632	11.5797	6.56286	5.63087	18.7447	9.36053	17.7705	8.94274
6.50341	5.83479	7.55194	6.25094	10.6445	6.29832	11.889	4.29207	7.35004	4.61622	8.06246	6.17846	8.98236	6.74314	9.40249	6.38753	7.2903	5.53533	5.68904	6.72323		6.15094	12.8262	9.27077	11.839	7.09072	7.68363	7.18046	7.4386	7.09576	13.4796	8.63854	6.40907	8.93499	11.468	6.20337	16.2909	13.8618	15.0385	7.53036	13.5089		7.92956	11.6119	6.56286	5.73066	19.078	9.34023	17.7569	8.94105
6.5273	5.84554	7.56786	6.35766	10.5498	6.27204	11.8934	4.25941	7.33928	4.61105	8.0537	6.20633	8.92581	6.7296	9.40209	6.31027	7.29787	5.53533	5.57594	6.72323		6.14287	12.8514	9.3101	11.8219	7.11996	7.66144	7.20265	7.52633	7.03526	13.4796	8.62644	6.39193	8.96222	11.4649	6.20035	15.0627	13.9011	14.9498	7.54952	13.5069		7.92956	11.6203	6.56455	5.75265	19.2759	9.29626	17.7502	8.90891
6.56952	5.87103	7.55791	6.42098	10.5064	6.23859	11.8886	4.24547	7.32017	4.61224	8.06644	6.23501	8.87962	6.76026	9.38775	6.30191	7.34804	5.50864	5.53931	6.72841		6.15799	12.8857	9.3827	11.7937	7.12097	7.66447	7.29541	7.69674	7.00098	13.4786	8.61131	6.38588	9.03683	11.4528	6.19429	14.0231	13.9546	14.9125	7.54347	13.5058		7.92956	11.6152	6.56963	5.75096	19.4095	9.27427	17.74	8.68902
6.595	5.87581	7.538	6.40186	10.5127	6.26607	11.8627	4.22198	7.31818	4.5991	8.06684	6.23063	8.83103	6.89526	9.38417	6.30151	7.39225	5.47519	5.59546	6.72801		6.19429	12.9039	9.47547	11.8118	7.10181	7.68161	7.57271	7.84093	6.99694	13.4826	8.60627	6.38286	9.18103	11.4246	6.18421	13.1015	14.008	14.6957	7.53943	13.4887		7.92279	11.6203	6.58147	5.74927	19.5177	9.28273	17.6774	8.51819
6.59819	5.88059	7.50256	6.38952	10.5462	6.27841	11.8559	4.1949	7.33889	4.60587	8.05091	6.24138	8.77369	6.96057	9.41523	6.28439	7.38827	5.42303	5.70776	6.73		6.23765	12.922	9.52992	11.8118	7.0887	7.7411	7.89135	7.95689	6.99694	13.4917	8.60627	6.38991	9.28186	11.4165	6.18018	12.2515	14.0604	14.5979	7.55355	13.4736		7.91941	11.6186	6.56624	5.74927	19.4129	9.29287	17.603	8.54525
6.59859	5.90528	7.45596	6.40107	10.5733	6.28757	11.9232	4.20008	7.358	4.5537	7.99994	6.2131	8.71873	6.95739	9.39014	6.16133	7.35004	5.37325	5.83917	6.74394		6.29009	12.9381	9.55815	11.7927	7.08467	7.93471	8.01739	8.10008	7.02114	13.5008	8.61534	6.39899	9.31111	11.4044	6.1832	11.5839	14.1119	14.5626	7.56868	13.4595		7.9211	11.6372	6.54087	5.75096	19.2843	9.2878	17.532	8.54525
6.60456	5.90647	7.42928	6.3923	10.5629	6.30549	12.1335	4.20286	7.358	4.48122	7.92786	6.20474	8.67135	6.96296	9.27107	6.00881	7.29229	5.3605	5.93315	6.76186		6.3395	12.9412	9.56622	11.7927	7.14618	8.20495	8.03151	8.15755	7.09576	13.52	8.63047	6.40302	9.33833	11.3671	6.18824	11.0303	14.1623	14.4668	7.57473	13.4282		7.92279	11.6795	6.55102	5.74758	19.3198	9.27765	17.4778	8.5554
6.61173	5.88975	7.41495	6.3712	10.5378	6.29195	12.4087	4.21441	7.33968	4.4633	7.90038	6.19439	8.6359	6.95978	9.19899	5.92638	7.23336	5.37006	5.88855	6.75867		6.34756	12.9422	9.56521	11.7816	7.30751	8.35216	8.06277	8.15654	7.18752	13.5593	8.64257	6.50184	9.4069	11.3359	6.15598	10.5635	14.2056	14.3166	7.59388	13.3939		7.92279	11.7252	6.54764	5.74927	19.3672	9.29964	17.4728	8.56216
6.59779	5.86386	7.39822	6.35846	10.4924	6.2804	12.5532	4.25105	7.33689	4.45096	7.90277	6.12151	8.62276	6.96734	9.20935	5.8766	7.19752	5.37325	5.84037	6.72681		6.3395	12.9422	9.58336	11.6959	7.45372	8.44897	8.1394	8.1515	7.2702	13.5976	8.65366	6.76502	9.4795	11.3187	6.06119	10.3668	14.1935	14.2157	7.61607	13.3606		7.91941	11.7996	6.49351	5.74758	19.2894	9.33178	17.4609	8.4759
6.57628	5.8555	7.37592	6.35766	10.4227	6.26328	12.6038	4.26618	7.35999	4.45215	7.90436	6.03948	8.62236	7.00836	9.22488	5.88975	7.21583	5.37205	5.83121	6.65035		6.32841	12.9492	9.61865	11.5224	7.58985	8.48325	8.20696	8.15251	7.32768	13.6238	8.65164	7.12702	9.54504	11.2965	5.99363	10.3477	14.129	14.1502	7.61506	13.3415		7.91772	11.8571	6.47152	5.7239	19.0746	9.3876	17.3577	8.42516
6.55996	5.86067	7.33889	6.35567	10.3499	6.19518	12.6217	4.25065	7.37473	4.47804	7.90118	5.99488	8.62356	7.09438	9.23722	5.89413	7.2899	5.36966	5.81169	6.56275		6.31731	12.9896	9.61159	11.3681	7.74615	8.36326	8.25032	8.14949	7.34785	13.643	8.64963	7.40633	9.61664	11.2794	5.99263	10.383	14.0867	14.1088	7.61708	13.3526		7.92279	11.8504	6.50197	5.71036	18.8818	9.506	17.2563	8.44884
6.58266	5.86028	7.30981	6.35447	10.2985	6.09603	12.6225	4.25344	7.39623	4.47684	7.89441	5.99289	8.6152	7.17402	9.24041	5.89651	7.34924	5.37006	5.79815	6.52491		6.33748	13.0541	9.58134	11.227	7.86916	8.17873	8.28561	8.14949	7.34785	13.651	8.65769	7.5354	9.67512	11.2814	5.97447	10.4374	14.0574	14.1169	7.62918	13.3778		7.93294	11.7793	6.49689	5.70698	18.7938	9.5652	17.258	8.34735
6.60974	5.86426	7.30105	6.33894	10.2826	6.06696	12.6576	4.2407	7.44043	4.47326	7.87609	5.9889	8.55666	7.20588	9.24041	5.89851	7.38986	5.37006	5.78939	6.52292		6.39193	13.1398	9.53395	11.1786	7.90345	8.13537	8.30477	8.17066	7.34281	13.644	8.68593	7.57069	9.69932	11.2834	5.92607	10.4445	13.9838	14.0988	7.65237	13.3909		7.93125	11.715	6.50704	5.7222	18.7498	9.5838	17.148	8.27631
6.59699	5.86545	7.26641	6.33536	10.2674	6.06576	12.7085	4.23592	7.4695	4.47246	7.85459	5.99129	8.48179	7.21305	9.23921	5.92638	7.42769	5.36289	5.78023	6.40346		6.43932	13.2598	9.41597	11.1685	7.89841	8.1878	8.33099	8.2241	7.33877	13.6389	8.70206	7.55557	9.70234	11.2774	5.87868	10.2731	13.8709	13.9384	7.67052	13.3979		7.92279	11.7303	6.51212	5.72559	18.7008	9.59395	17.0634	8.30337
6.59182	5.89612	7.23415	6.33974	10.2184	6.05381	12.7603	4.23273	7.46751	4.47127	7.84543	6.01041	8.38104	7.21743	9.20019	5.93873	7.46114	5.34617	5.79417	6.26965		6.47058	13.3758	9.31917	11.1221	7.89942	8.22915	8.40157	8.23822	7.33171	13.6349	8.71416	7.58078	9.71041	11.2633	5.80911	9.94737	13.7347	13.5774	7.67959	13.403		7.9211	11.7624	6.51212	5.72051	18.6822	9.59226	17.0651	8.35073
6.59142	5.97417	7.21066	6.33894	10.1663	6.00961	12.7934	4.23592	7.46034	4.45176	7.84344	6.0339	8.27153	7.24371	9.15399	5.92758	7.47548	5.35971	5.81408	6.22186		6.50083	13.4564	9.31514	11.0182	7.89841	8.25536	8.54678	8.23721	7.31256	13.6359	8.72525	7.61809	9.76083	11.2602	5.74054	9.63176	13.5421	12.9543	7.68665	13.402		7.9211	11.7793	6.49858	5.79663	18.6737	9.59564	17.055	8.38456
6.59301	6.01558	7.16088	6.34093	10.1336	5.91005	12.7997	4.23751	7.45079	4.46211	7.84383	6.05222	8.22255	7.2672	9.17231	5.93753	7.48503	5.36409	5.83041	6.20872		6.53713	13.5432	9.38774	10.9023	7.89841	8.21402	8.66576	8.20898	7.25911	13.641	8.71114	7.65338	9.84856	11.2613	5.69012	9.33631	13.3727	12.1143	7.69674	13.3979		7.91264	11.7962	6.44107	5.9015	18.6416	9.59395	17.0516	8.3575
6.59938	6.01718	7.1107	6.34014	10.1093	5.79258	12.8077	4.24388	7.4691	4.45693	7.84423	6.0801	8.21418	7.27915	9.14643	5.93634	7.49101	5.35413	5.8097	6.21111		6.58654	13.6621	9.44824	10.7631	7.88429	8.1273	8.73735	8.19789	7.19559	13.6521	8.70408	7.75825	9.92015	11.231	5.64575	9.15985	13.3314	11.5285	7.70682	13.4		7.89404	11.7979	6.3565	5.87613	18.6399	9.62102	17.0617	8.28138
6.61252	6.01837	7.09278	6.34492	10.0946	5.74001	12.8252	4.263	7.52963	4.4422	7.84423	6.11594	8.22215	7.29986	9.05802	5.92439	7.47826	5.35015	5.7428	6.22784		6.64301	13.8245	9.48656	10.6401	7.86614	8.01941	8.82206	8.18175	7.17139	13.6621	8.75046	7.90849	9.9988	11.1997	5.59231	9.05599	13.3314	11.4962	7.70077	13.403		7.86697	11.8165	6.28715	5.85752	18.6449	9.62778	17.1006	8.18159
6.65314	6.00284	7.10712	6.33934	10.0815	5.73842	12.8372	4.26778	7.59614	4.4422	7.84662	6.12032	8.20463	7.32017	9.00028	5.92638	7.43764	5.34657	5.68984	6.2597		6.68032	14.0806	9.48555	10.5847	7.86211	7.94177	8.93499	8.13335	7.16029	13.6722	8.82206	7.99823	10.0976	11.2028	5.56206	8.99852	13.2991	11.6071	7.6917	13.41		7.83145	11.9197	6.22964	5.84568	18.6517	9.59734	17.1142	8.06149
6.73518	6.01558	7.12783	6.35368	10.048	5.75395	12.8487	4.26101	7.62561	4.3964	7.84742	6.11952	8.01865	7.3138	8.9947	5.93315	7.4026	5.34617	5.71174	6.27443		6.68637	14.3771	9.43715	10.5332	7.86009	7.99723	9.04288	8.08495	7.10988	13.6823	8.89264	8.0184	10.1571	11.1917	5.54593	9.01364	13.157	11.6152	7.69573	13.4383		7.8027	11.9891	6.18566	5.90319	18.6534	9.56351	17.0973	7.96846
6.81522	6.00563	7.1334	6.35567	10.0285	5.81687	12.8714	4.26618	7.63994	4.33786	7.8526	6.11952	7.71003	7.29946	8.98555	5.97337	7.36796	5.34617	5.74479	6.27602		6.69444	14.4779	9.42102	10.4949	7.84396	8.19789	9.14069	8.00731	7.0403	13.6873	8.96222	8.0184	10.1914	11.1675	5.51366	9.03381	12.9664	11.597	7.69976	13.4756		7.78748	12.0161	6.16368	6.06388	18.6534	9.55843	17.1142	7.91603
6.86659	6.00045	7.13221	6.34731	10.0301	5.84674	12.8985	4.25185	7.6507	4.29366	7.87569	6.12072	7.5149	7.29588	8.95209	6.00085	7.31658	5.3832	5.76789	6.27682		6.69343	14.4799	9.41597	10.5151	7.89236	8.40964	9.24254	7.98714	6.99291	13.6863	9.00658	8.02647	10.2348	11.1725	5.49047	9.03078	12.8444	11.6001	7.71287	13.4927		7.76041	12.0567	6.13661	6.19074	18.6669	9.55505	17.1243	7.93971
6.8873	6.02076	7.13858	6.34969	10.0277	5.84475	12.912	4.21123	7.66065	4.27455	7.9191	6.12948	7.41773	7.29588	8.92462	5.95705	7.28433	5.46285	5.78501	6.28837		6.68334	14.5868	9.38875	10.5363	8.07689	8.56291	9.34136	8.12327	6.96871	13.7045	9.0207	8.07991	10.2539	11.2078	5.50559	9.02171	12.7758	11.5849	7.75825	13.526		7.74857	12.1041	6.11293	6.27362	18.7075	9.56351	17.1311	7.90926
6.8877	6.03151	7.15331	6.34611	10.0225	5.84594	12.9029	4.21043	7.66782	4.26857	7.9637	6.13505	7.34924	7.2907	8.90072	5.83559	7.25566	5.5405	5.7647	6.3712		6.69545	14.7028	9.40589	10.5373	8.2352	8.64559	9.42807	8.28561	6.95157	13.7277	9.02978	8.14142	10.1521	11.23	5.52677	8.95314	12.7213	11.5396	7.80261	13.5976		7.75026	12.1092	6.10786	6.3362	18.7617	9.53644	17.1345	7.76041
6.8873	6.02912	7.17004	6.34253	10.015	5.84594	12.8806	4.16185	7.66862	4.11725	7.98879	6.13187	7.30384	7.28513	8.86369	5.80054	7.16406	5.61019	5.74001	6.4154		6.71259	14.7471	9.45732	10.5393	8.30376	8.72727	9.51076	8.41065	6.93846	13.7368	9.05801	8.06882	9.99073	11.2492	5.53685	8.88558	12.674	11.5234	7.80766	13.643		7.74857	12.1193	6.12815	6.37172	18.8023	9.51276	17.1226	7.63863
6.88332	6.03231	7.18119	6.35925	10.0042	5.85271	12.8487	4.10211	7.66304	3.92411	7.99715	6.102	7.25486	7.28274	8.83143	5.77386	7.06929	5.67271	5.72767	6.37916		6.70956	14.7562	9.48757	10.504	8.31183	8.79786	9.59243	8.49636	6.91728	13.7418	9.08927	7.97101	9.91914	11.2855	5.53181	9.00255	12.6306	11.5224	7.80866	13.648		7.7435	12.1751	6.15522	6.3768	18.8226	9.52122	17.0347	7.61495
6.88451	6.00404	7.18278	6.35726	9.99584	5.91762	12.8009	4.06946	7.64313	3.82495	7.99715	6.05262	7.20747	7.27597	8.82825	5.60701	7.02508	5.6763	5.71692	6.35408		6.7025	14.7622	9.51378	10.4818	8.31788	8.80895	9.6721	8.453	6.9072	13.7378	9.09431	7.9095	9.88587	11.2834	5.5187	9.18002	12.5651	11.5607	7.80362	13.645		7.73842	12.2326	6.17721	6.37342	18.8395	9.51107	16.94	7.61664
6.90641	5.99886	7.1788	6.36642	10.0042	5.96461	12.7508	4.02287	7.60729	3.81022	7.99755	6.03908	7.20628	7.2676	8.82864	5.35055	6.95539	5.65957	5.70338	6.35965		6.69141	14.7592	9.53496	10.5463	8.33301	8.78777	9.73764	8.3199	6.92031	13.7337	9.08523	7.85001	9.87175	11.3026	5.51769	9.22842	12.5116	11.7937	7.80463	13.645		7.73504	12.2377	6.20765	6.38526	18.8547	9.50938	16.9197	7.61833
6.92672	6.00682	7.17721	6.36363	9.96558	5.96461	12.7018	3.99738	7.58578	3.80942	7.99874	5.99766	7.19513	7.26561	8.83462	5.15701	6.84071	5.65201	5.69661	6.35447		6.72771	14.7552	9.53395	10.5201	8.32998	8.78273	9.78806	8.24629	6.92434	13.7337	9.07313	7.80362	9.88687	11.352	5.58323	9.22439	12.4894	11.8108	7.8006	13.6107		7.7232	12.2309	6.20596	6.40048	18.8547	9.47048	16.9011	7.61833
6.93429	6.00603	7.178	6.35806	9.70394	5.967	12.6432	3.99897	7.57901	3.75486	8.00432	5.88696	7.19274	7.26681	8.83462	5.15582	6.76465	5.68028	5.69143	6.35806		6.90922	14.7562	9.51983	10.2116	8.35015	8.77164	9.87074	8.2483	6.92434	13.7247	9.06507	7.7885	9.89091	11.3449	5.63668	9.27783	12.4612	11.5315	7.80766	13.5754		7.7232	12.2309	6.1975	6.40386	18.8479	9.34869	16.874	7.61326
6.92951	6.00603	7.17083	6.35766	9.33439	5.97497	12.5847	3.9938	7.57702	3.72061	8.00273	5.86306	7.20269	7.27756	8.85533	5.05984	6.71805	5.71492	5.67869	6.33576		7.07358	14.7572	9.52286	9.71041	8.3925	8.75954	9.96452	8.33301	6.92737	13.7105	9.08019	7.7885	9.88385	11.3359	5.68205	9.28388	12.3987	11.2744	7.81068	13.5714		7.69106	12.2411	6.18905	6.39879	18.8327	9.22183	16.8892	7.60311
6.93588	5.99249	7.1561	6.35487	9.1532	6.07054	12.5644	3.96074	7.57742	3.71504	7.99556	5.86227	7.21145	7.32296	8.88838	4.91768	6.68022	5.72249	5.69621	6.1697		7.10282	14.7572	9.53899	9.1891	8.43888	8.79483	10.0059	8.50039	6.94753	13.7115	9.13364	7.7764	9.88587	11.3258	5.74356	9.28791	12.3311	11.1917	7.79959	13.5623		7.61664	12.2529	6.18566	6.3971	18.8039	9.12542	16.8791	7.59634
6.97332	5.93873	7.21663	6.31943	9.17988	6.09403	12.5775	3.96194	7.57822	3.70668	7.9856	5.85749	7.21384	7.35043	8.93059	4.83126	6.6627	5.70895	5.72289	6.1012		7.0887	14.7522	9.54101	8.68391	8.4651	8.78979	9.99678	8.65769	6.94552	13.7337	9.21229	7.7653	9.89192	11.2996	5.77986	9.32724	12.2767	11.2048	7.79455	13.5502		7.44242	12.2698	6.18736	6.39371	18.7684	9.07637	16.8892	7.59127
7.01592	5.83081	7.31977	6.31505	9.22368	6.11474	12.5704	3.96871	7.583	3.69075	7.9637	5.79138	7.21583	7.23415	8.9728	4.77352	6.66389	5.72807	5.74599	6.10757		7.10282	14.7522	9.53294	8.37031	8.48829	8.72727	9.99779	8.82811	6.92737	13.7569	9.35648	7.75724	9.89998	11.2855	5.81818	9.33127	12.2464	11.1786	7.80261	13.5553		7.21407	12.3104	6.18566	6.34635	18.7414	9.08313	16.9214	7.58788
7.05535	5.62771	7.37433	6.32222	9.20895	6.13226	12.5528	3.95597	7.59574	3.68716	7.90436	5.654	7.22539	7.07566	8.98833	4.77233	6.66788	5.74439	5.75674	6.10996		7.14315	14.7663	9.52387	8.25032	8.54577	8.72425	9.99981	8.92995	6.91728	13.7539	9.52387	7.75825	9.92519	11.2804	5.90692	9.32724	12.2303	11.0072	7.81068	13.5472		7.08721	12.3629	6.18566	6.24487	18.7261	8.93428	16.9501	7.57943
7.09318	5.46165	7.39543	6.35885	9.20656	6.13266	12.5632	3.95119	7.58857	3.68278	7.80799	5.62333	7.23734	6.94663	8.99311	4.70821	6.63323	5.75196	5.76192	6.10837		7.16534	14.7864	9.51681	8.14243	8.64358	8.83617	9.99477	8.93701	6.90821	13.7388	9.60353	7.76026	9.96754	11.2542	5.96641	9.32825	12.2232	10.8287	7.81169	13.519		7.0703	12.4136	6.18566	6.19581	18.7177	8.54525	16.9467	7.54052
7.13579	5.43895	7.41096	6.36602	9.21014	6.14501	12.5747	3.95955	7.54079	3.66725	7.67618	5.62612	7.23256	6.89367	8.9955	4.60547	6.56474	5.7647	5.77386	6.1016		7.17844	14.8016	9.50975	8.02647	8.77668	8.92692	9.99981	8.93197	6.88804	13.7267	9.66302	7.75825	9.97863	11.1887	6.00977	9.37564	12.2363	10.7581	7.80967	13.5351		7.20054	12.4559	6.18736	6.19074	18.7177	8.11731	16.9247	7.51684
7.19473	5.44134	7.42132	6.34213	9.21174	6.13465	12.6046	3.96035	7.52008	3.67004	7.54636	5.62094	7.22061	6.89088	8.99192	4.58954	6.50381	5.77625	5.76351	6.08249		7.18147	14.8288	9.50874	7.93975	8.92592	8.9481	10.022	8.92995	6.84771	13.6914	9.72251	7.74413	9.97863	11.1645	6.10455	9.43614	12.2242	10.9769	7.79959	13.523		7.45426	12.4559	6.18905	6.18905	18.7008	7.91095	16.8858	7.50838
7.23017	5.43218	7.42411	6.31983	9.20815	6.14461	12.6608	3.95159	7.55353	3.65292	7.47986	5.609	7.21106	6.85823	8.91904	4.58436	6.45403	5.77187	5.77665	6.08249		7.17441	14.8843	9.51076	7.85807	9.02574	8.99549	10.0371	8.92995	6.80939	13.645	9.73562	7.7169	9.98166	11.2068	6.22455	9.4553	12.1809	11.8441	7.77035	13.4887		7.70798	12.395	6.18905	6.18228	18.65	7.88051	16.83	7.49824
7.20429	5.42303	7.42012	6.30589	9.16634	6.15735	12.6711	3.94681	7.60331	3.5888	7.47349	5.61537	7.20707	6.85823	8.75935	4.56644	6.44129	5.77267	5.78103	6.06457		7.15727	14.9185	9.50673	7.75623	9.05297	9.17901	10.0422	8.93398	6.78922	13.6289	9.73159	7.67657	9.98973	11.2592	6.29816	9.55109	12.1617	12.8413	7.70985	13.4726		7.9008	12.3324	6.1975	6.17552	18.6348	7.88389	16.8165	7.49824
7.17999	5.43378	7.4034	6.16133	9.06081	6.17089	12.6532	3.94601	7.65547	3.52628	7.47349	5.60263	7.21822	6.83672	8.62555	4.53976	6.46	5.82603	5.78103	5.95943		7.16231	14.9165	9.5158	7.60498	9.05095	9.33833	10.0563	8.93297	6.77712	13.6289	9.74772	7.64329	9.98973	11.3076	6.35966	9.81427	12.1577	13.6016	7.65035	13.4857		7.97015	12.2851	6.23472	6.17044	18.6331	7.823	16.8097	7.52361
7.18756	5.42741	7.39782	6.05541	8.94333	6.21151	12.6329	3.93207	7.74906	3.49681	7.45397	5.55723	7.24052	6.83872	8.55228	4.51627	6.47275	5.86744	5.80134	5.84355		7.15122	14.9286	9.42606	7.43457	9.05095	9.39379	10.0603	8.92995	6.77611	13.6309	9.79411	7.65035	9.99779	11.3278	6.4363	9.89897	12.1577	14.0927	7.62615	13.4726		7.97692	12.2445	6.25501	6.14845	18.6331	7.60818	16.7522	7.54221
7.2246	5.42542	7.40897	6.05421	8.87086	6.23302	12.6209	3.93167	7.86016	3.49522	7.44442	5.54249	7.24849	6.86141	8.51285	4.51507	6.48549	5.877	5.83439	5.90647		7.11895	14.9397	9.19111	7.37306	9.04591	9.46236	10.0512	8.89163	6.7751	13.6309	9.85662	7.66245	10.0038	11.3157	6.51495	9.89595	12.1567	14.1532	7.62615	13.4474		8.01582	12.2259	6.24994	6.11293	18.6331	7.45088	16.6338	7.52868
7.25486	5.41347	7.41773	6.04704	8.80913	6.22664	12.617	3.92092	7.92826	3.49044	7.45118	5.5632	7.24331	6.87973	8.48378	4.51547	6.51575	5.8543	5.84913	5.91682		7.11189	14.9387	9.10439	7.39222	9.02978	9.58336	10.0351	8.8876	6.79628	13.6339	9.89595	7.66548	10.0028	11.3944	6.60268	9.90906	12.1637	14.2288	7.62414	13.4201		8.1004	12.258	6.24994	6.10109	18.6331	7.4069	16.5712	7.48809
7.24451	5.33223	7.41375	6.05302	8.75418	6.22784	12.6054	3.91973	7.96888	3.47212	7.45278	5.50864	7.25128	6.85186	8.41847	4.52583	6.53646	5.79457	5.88019	5.77346		7.125	14.9145	9.1054	7.49204	9.02776	9.64386	10.0149	8.87146	6.85275	13.6299	9.89998	7.6685	10.0069	11.4498	6.6783	9.89998	12.1678	14.8137	7.62514	13.3778		8.07333	12.3527	6.24994	6.11293	18.6348	7.40351	16.6	7.4847
7.2007	5.25418	7.40101	6.06098	8.70241	6.36642	12.57	3.92092	7.97644	3.42792	7.45437	5.44015	7.26402	6.81801	8.26595	4.53498	6.52252	5.79935	5.89771	5.63209		7.1129	14.8298	9.12355	7.5596	9.03179	9.65596	9.97762	8.85735	6.92737	13.5603	9.90301	7.66144	10.0321	11.4508	6.75191	9.87881	12.1678	16.1487	7.63825	13.401		8.04458	12.554	6.25332	6.17044	18.6399	7.37645	16.6034	7.51008
7.16008	5.25537	7.38906	6.06178	8.62993	6.65314	12.5469	3.88389	7.93941	3.37376	7.4484	5.43617	7.26243	6.81402	8.10905	4.52941	6.5058	5.80214	5.89771	5.57594		7.09778	14.7582	9.16288	7.52532	9.03583	9.67008	9.89998	8.86844	6.97778	13.3969	9.95443	7.67254	10.0633	11.4518	6.86485	9.84553	12.1698	17.8347	7.66346	13.402		8.09532	12.8466	6.25671	6.22626	18.6483	7.39167	16.5492	7.52192
7.18875	5.21077	7.3803	6.06297	8.60444	6.81602	12.5397	3.83451	7.89242	3.36221	7.43526	5.43019	7.24769	6.8188	8.03817	4.53857	6.48748	5.79935	5.88895	5.57316		7.11996	14.738	9.18506	7.49103	9.03583	9.67512	9.80621	8.88457	6.96568	13.3253	10.0442	7.71287	10.0916	11.4498	6.99795	9.80318	12.1698	19.0195	7.68363	13.284		8.09363	13.0378	6.26685	6.2584	18.6551	7.42889	16.5103	7.505
7.25526	5.18967	7.37831	6.06138	8.61838	6.78057	12.527	3.82853	7.86295	3.36659	7.43366	5.43019	7.25048	6.82438	8.02662	4.54653	6.45124	5.80492	5.86824	5.58869		7.12803	14.727	9.18607	7.47792	9.03885	9.66403	9.74974	8.89869	6.88804	13.3818	10.1369	7.70884	10.1168	11.4478	7.12601	9.76587	12.1678	19.6316	7.69775	13.1267		8.1004	13.0716	6.24487	6.27024	18.6636	7.45088	16.5069	7.47117
7.31499	5.1825	7.38229	6.06138	8.61838	6.84907	12.5234	3.83052	7.85379	3.37018	7.43526	5.43139	7.25964	6.83155	8.02662	4.54454	6.39151	5.80373	5.88298	5.59864		7.12702	14.7239	9.18809	7.48297	9.04591	9.63176	9.7326	8.92894	6.7993	13.3788	10.2327	7.70783	10.139	11.4417	7.27323	9.73865	12.1627	19.8322	7.70178	13.0067		8.10885	13.0513	6.16029	6.26347	18.694	7.44242	16.5323	7.46441
7.35083	5.11599	7.4022	6.06257	8.60126	7.05495	12.5457	3.83769	7.89361	3.36898	7.43884	5.41426	7.2672	6.81363	8.02622	4.54454	6.30828	5.79457	5.89174	5.60143		7.13609	14.7391	9.2012	7.48498	9.04793	9.63378	9.76587	8.92692	6.69746	13.3374	10.2872	7.71791	10.148	11.4397	7.38516	9.73562	12.1617	19.8171	7.69976	12.9674		8.11054	13.0192	6.18228	6.24825	18.5993	7.41705	16.7235	7.4864
7.34446	5.0471	7.41057	6.06138	8.59967	7.17203	12.5329	3.84765	7.95813	3.33912	7.44481	5.40391	7.26959	6.81482	8.01627	4.54136	6.23182	5.78023	5.877	5.62293		7.13609	14.7471	9.22136	7.46683	9.08523	9.64991	9.81528	8.81903	6.57343	13.281	10.3104	7.73001	10.1561	11.4438	7.40331	9.82536	12.1536	19.7899	7.69875	12.9654		8.13253	13.0039	6.46306	6.24994	18.2678	7.40351	17.0702	7.53207
7.34207	5.0479	7.40977	6.06656	8.59807	7.25128	12.3382	3.85083	8.00551	3.27898	7.4265	5.40949	7.27238	6.80606	7.97286	4.54534	6.1693	5.78621	5.86306	5.62174		7.15424	14.7542	9.25363	7.44667	9.17296	9.65899	9.85461	8.69198	6.52201	13.2386	10.3336	7.75018	10.1611	11.4438	7.40129	9.96452	12.1466	19.8	7.70279	12.9654		8.2374	13.0039	6.85548	6.26685	17.9887	7.4069	17.1666	7.58788
7.34207	5.03077	7.42888	6.06377	8.59927	7.2903	11.9077	3.8576	8.06684	3.26903	7.39344	5.39316	7.27198	6.80208	7.91631	4.54534	6.1239	5.78302	5.86784	5.60183		7.16937	14.7673	9.29699	7.43557	9.2385	9.66	9.86872	8.63954	6.58453	13.2396	10.3497	7.75825	10.1793	11.4488	7.42347	10.0704	12.1698	19.808	7.69875	12.9654		8.34735	13.0022	6.97558	6.27531	17.877	7.42889	17.1852	7.62848
7.34247	4.97582	7.44043	6.06019	8.58294	7.26044	11.3578	3.86597	8.16759	3.26823	7.34008	5.37046	7.25725	6.79571	7.86136	4.53737	6.07412	5.78342	5.90129	5.61099		7.17139	14.7743	9.34438	7.43356	9.26573	9.661	9.85158	8.65366	6.64099	13.2175	10.3527	7.7522	10.1652	11.4609	7.45171	10.149	12.198	19.8131	7.68464	12.9644		8.42685	12.9244	6.97558	6.25671	17.855	7.4272	17.3172	7.63017
7.37074	4.93401	7.3815	6.06019	8.55745	7.26163	10.8664	3.86836	8.27033	3.26823	7.27238	5.38201	7.12663	6.76703	7.8303	4.52782	6.0347	5.78382	5.95426	5.62811		7.16937	14.7794	9.38068	7.46482	9.2738	9.661	9.8294	8.67786	6.6662	13.2205	10.3608	7.73405	10.0159	11.4811	7.47389	10.1964	12.2363	19.8433	7.68464	12.9654		8.49112	12.4779	7.01786	6.23303	17.8567	7.4272	17.3933	7.63863
7.46552	4.9137	7.30105	6.08249	8.52639	7.28871	10.5613	3.86836	8.35117	3.26823	7.22021	5.3621	6.8654	6.74593	7.82671	4.52821	6.02435	5.76948	5.94669	5.62254		7.16836	14.7895	9.39782	7.49305	9.27279	9.65899	9.82133	8.68895	6.73477	13.2033	10.3769	7.71287	9.92317	11.4992	7.52431	10.2317	12.2948	19.924	7.68968	12.9674		8.55032	11.8859	7.06522	6.22626	17.8178	7.41705	17.4271	7.6234
7.52605	4.90135	7.25008	6.12709	8.47104	7.29866	10.4068	3.86159	8.38064	3.26465	7.20946	5.28285	6.64319	6.73757	7.82432	4.51985	6.02315	5.70935	5.94789	5.6528		7.16937	14.7975	9.40892	7.49305	9.27783	9.64588	9.82637	8.69702	6.79527	13.2134	10.4112	7.70581	9.92317	11.5023	7.6322	10.268	12.314	19.9966	7.70077	12.923		8.65519	11.4326	7.36969	6.2178	17.7282	7.41535	17.4711	7.59803
7.54517	4.90175	7.21384	6.14979	8.40254	7.29866	10.3471	3.84446	8.37746	3.26903	7.24809	5.12834	6.49106	6.7292	7.81317	4.49476	6.02036	5.6297	5.93713	5.67669		7.18651	14.8056	9.42908	7.49608	9.28086	9.61966	9.83141	8.7071	6.82653	13.2709	10.4949	7.70279	9.91107	11.4972	7.80463	10.2942	12.2918	20.049	7.70178	12.7718		8.75668	11.1501	7.91603	6.18905	17.5793	7.4255	17.537	7.59972
7.56229	4.90135	7.22141	6.15417	8.31852	7.30066	10.3511	3.83013	8.37945	3.27779	7.313	5.03555	6.48111	6.74195	7.8076	4.46888	6.01996	5.55404	5.92479	5.67789		7.20668	14.8217	9.45127	7.50918	9.27884	9.61966	9.83646	8.7192	6.90619	13.3556	10.5766	7.70279	9.8899	11.4861	7.95588	10.2973	12.2746	20.1095	7.69976	12.5479		8.76345	10.9776	8.17482	6.16368	17.3375	7.44242	17.6825	7.65216
7.57583	4.89418	7.22021	6.14899	8.25202	7.30026	10.3327	3.81579	8.38582	3.26584	7.38747	5.026	6.60655	6.71447	7.83706	4.47764	6.02036	5.50506	5.93873	5.67032		7.25004	14.8359	9.47042	7.48902	9.30707	9.61966	9.84956	8.7192	7.07963	13.3657	10.624	7.70178	9.95242	11.47	8.01336	10.2862	12.2605	20.167	7.69775	12.2726		8.76176	10.8422	8.37441	6.15691	17.0262	7.44749	17.8466	7.76549
7.54835	4.88662	7.19592	6.15018	8.23489	7.2899	10.328	3.82575	8.39259	3.27819	7.45318	5.03316	6.73597	6.63482	7.92149	4.46171	6.01957	5.50068	5.95505	5.66037		7.29642	14.858	9.4916	7.46986	9.37866	9.61462	9.86872	8.68492	7.22584	13.3687	10.6714	7.68968	10.0522	11.4387	8.03252	10.265	12.2353	20.1942	7.65338	12.0205		8.80235	10.7306	8.62475	6.13661	16.7996	7.44242	17.8956	7.76379
7.49021	4.90255	7.20707	6.1685	8.23529	7.27397	10.3268	3.86238	8.40095	3.26465	7.48384	5.03316	6.81044	6.60695	8.02821	4.44976	6.02076	5.4967	5.9682	5.65758		7.31659	14.8802	9.50975	7.51927	9.41597	9.61361	9.89797	8.67282	7.3176	13.4111	10.7067	7.67959	10.0704	11.4004	8.05168	10.2529	12.2091	20.2033	7.61809	11.8199		8.88861	10.6782	8.74653	6.11631	16.7235	7.44073	17.9041	7.63017
7.44402	4.92405	7.21344	6.21151	8.23609	7.27597	10.3264	3.89544	8.4125	3.33553	7.49379	5.03316	6.80487	6.58584	8.0991	4.44976	5.9893	5.50267	5.96262	5.63847		7.32264	14.8873	9.53899	7.58178	9.43312	9.61462	9.93023	8.67181	7.38919	13.4242	10.6734	7.6806	10.0543	11.348	8.08092	10.2519	12.201	20.2033	7.61708	11.5749		8.93767	10.69	8.79558	6.11631	16.7048	7.43227	17.9109	7.54221
7.46194	4.92963	7.21305	6.22824	8.2564	7.27716	10.322	3.90221	8.41569	3.40681	7.50256	5.03356	6.77779	6.57668	8.15126	4.44976	5.94908	5.50944	5.94231	5.62851		7.33575	14.8994	9.59546	7.61909	9.46841	9.61159	9.93931	8.68089	7.43457	13.4332	10.6159	7.67758	10.0422	11.2905	8.12226	10.2539	12.2212	20.1973	7.62111	11.3389		8.95966	10.6968	8.7922	6.1197	16.6862	7.42043	17.9007	7.47794
7.48782	4.93082	7.19712	6.23063	8.29741	7.2692	10.3236	3.90181	8.38263	3.48128	7.50534	5.03237	6.77062	6.55717	8.17277	4.44658	5.92957	5.50825	5.93674	5.63687		7.36398	14.9286	9.65495	7.65338	9.5037	9.59748	9.93427	8.70206	7.48196	13.5502	10.5786	7.67859	10.0361	11.2945	8.1636	10.2801	12.2303	20.2033	7.62615	11.2552		8.96642	10.641	8.94951	6.11631	16.6558	7.43058	17.8872	7.46948
7.43924	4.91967	7.14137	6.24894	8.33166	7.26442	10.3244	3.90221	8.2771	3.50239	7.50295	5.04551	6.76823	6.46637	8.17237	4.4426	5.91165	5.50068	5.93474	5.6532		7.44767	14.9569	9.6973	7.66144	9.52689	9.57328	9.94334	8.72122	7.52128	13.769	10.5322	7.67959	10.027	11.3167	8.20898	10.3658	12.2424	20.1932	7.62615	11.2734		8.97657	10.6004	9.21676	6.11462	16.6067	7.45595	17.9684	7.45257
7.41534	4.91648	7.10393	6.25054	8.32768	7.23136	10.3272	3.89822	8.13454	3.50239	7.50216	5.03277	6.75111	6.42775	8.18631	4.43384	5.90846	5.4955	5.93395	5.7209		7.53843	14.9801	9.75075	7.66951	9.57227	9.55008	9.96653	8.7182	7.54851	13.9253	10.502	7.67859	10.02	11.347	8.29066	10.4818	12.2585	20.2003	7.62615	11.2461		8.99179	10.597	9.25228	6.09433	16.5357	7.49316	18.1494	7.4458
7.41534	4.91051	7.07606	6.24377	8.28706	7.20389	10.353	3.88428	8.0533	3.50398	7.50176	5.03157	6.66827	6.40226	8.20901	4.42388	5.89771	5.50745	5.90806	5.76072		7.58683	14.9942	9.79511	7.6806	9.6368	9.53193	9.99477	8.70105	7.56263	14.129	10.4989	7.68766	10.024	11.3641	8.4651	10.5342	12.2464	20.2366	7.63019	11.0021		8.99179	10.5953	9.25228	6.04866	16.4816	7.51853	18.2914	7.43227
7.39583	4.90055	7.03623	6.23302	8.23489	7.20707	10.3805	3.87433	8.03817	3.51155	7.50056	5.03476	6.57031	6.36762	8.2783	4.41432	5.87382	5.53572	5.88537	5.71254		7.62414	15.0022	9.81427	7.68565	9.65596	9.52689	10.0321	8.694	7.57473	14.5192	10.504	7.72295	10.0543	11.3772	8.72525	10.5453	12.2091	20.2729	7.6201	10.6825		8.97826	10.6038	9.37237	5.98776	16.4579	7.52023	18.4014	7.42043
7.39583	4.9125	7.0207	6.23142	8.16759	7.20667	10.3658	3.87473	8.04096	3.53783	7.49857	5.04232	6.54084	6.36523	8.4129	4.41153	5.86665	5.53373	5.90846	5.6986		7.67153	15.0153	9.83343	7.68867	9.57328	9.5279	10.0936	8.68694	7.58783	14.7683	10.4677	7.7774	10.1057	11.3762	8.9844	10.5302	12.1647	20.283	7.59691	10.6794		8.9901	10.6257	9.48401	5.89473	16.4528	7.505	18.5282	7.42043
7.39304	4.90374	6.96575	6.22067	8.07441	7.20747	10.3351	3.87154	8.04016	3.55017	7.49379	5.00768	6.56912	6.36801	8.55586	4.41313	5.87541	5.52218	5.95386	5.69501		7.72295	15.0234	9.86973	7.68867	9.44925	9.51681	10.1712	8.68593	7.63119	14.6453	10.4163	7.81774	10.141	11.3722	9.13263	10.4979	12.1123	20.2941	7.57674	10.985		8.99349	10.6088	9.48908	5.79663	16.4494	7.505	18.672	7.41366
7.39304	4.89179	6.78296	6.13465	8.02065	7.20747	10.3319	3.85402	8.04454	3.57088	7.48902	4.93918	6.67544	6.3712	8.75975	4.4195	5.88775	5.52856	5.93514	5.68466		7.80967	15.0244	9.90805	7.71388	9.39077	9.48353	10.2337	8.72021	7.71993	14.4083	10.3547	7.85807	10.1511	11.3893	9.17397	10.4838	12.077	20.3263	7.55557	11.2068		8.9901	10.5513	9.49754	5.73235	16.4393	7.49824	18.7549	7.38829
7.39185	4.89259	6.67226	6.02992	8.01587	7.21145	10.3323	3.83849	8.06326	3.63818	7.47508	4.92883	6.87814	6.3493	9.06081	4.441	5.89333	5.53333	5.8328	5.67829		7.89639	15.0133	9.97359	7.74917	9.37161	9.49362	10.2811	8.75147	7.80967	14.0181	10.2771	7.90042	10.148	11.3732	9.19615	10.5524	12.0931	20.3505	7.50818	11.3076		8.99349	10.482	9.53475	5.69852	16.4325	7.48301	18.7634	7.3274
7.37074	4.89259	6.66509	5.97895	8.01587	7.21225	10.3415	3.83331	8.05927	3.68039	7.45278	5.01046	7.05654	6.35089	9.3316	4.46012	5.90169	5.55404	5.744	5.67431		7.94882	15.0123	10.0775	7.76228	9.3827	9.53899	10.3205	8.75752	7.8732	13.5795	10.2448	7.90849	10.1511	11.3349	9.23044	10.6441	12.1032	20.3586	7.43658	11.356		9.00025	10.4431	9.53475	5.68499	16.4511	7.47625	18.7447	7.27835
7.34526	4.88861	6.69814	5.96979	8.01507	7.16645	10.3765	3.82973	8.04335	3.69473	7.43526	5.05148	7.14216	6.33377	9.42917	4.45693	5.90249	5.57794	5.67391	5.65599		8.02748	15.0214	10.1511	7.76026	9.41597	9.59243	10.3648	8.75853	7.93572	13.5028	10.2358	7.90244	10.149	11.3601	9.27884	10.6845	12.1002	20.3687	7.36701	11.355		9.02901	10.4008	9.59226	5.70022	16.4816	7.50162	18.7397	7.21238
7.33331	4.8679	6.81124	5.96899	7.99516	7.10831	10.3897	3.83291	8.03896	3.70827	7.3572	5.06184	7.17521	6.36284	9.39492	4.33587	5.87262	5.57515	5.59864	5.60024		8.14444	15.0516	10.1904	7.75522	9.46034	9.64386	10.4122	8.76155	7.95588	13.5653	10.1964	7.90345	10.148	11.4186	9.34741	10.6825	12.0982	20.3818	7.30852	11.356		9.06284	10.328	9.63962	5.73404	16.5137	7.52868	18.8175	7.11766
7.31658	4.7114	7.00398	5.95306	7.95574	7.09716	10.3694	3.82017	8.04135	3.71584	7.19473	5.06104	7.1557	6.51297	9.34514	4.11127	5.85231	5.58232	5.57236	5.55643		8.25839	15.1222	10.2388	7.7522	9.50068	9.661	10.4495	8.75248	7.92059	13.6339	10.143	7.92664	10.147	11.4559	9.40287	10.6522	12.0962	20.3878	7.26819	11.3843		9.1102	10.2536	9.64639	5.74588	16.5425	7.53714	18.9528	7.11427
7.25725	4.61343	7.19353	5.89134	7.91352	7.09796	10.3598	3.71424	8.04693	3.70548	7.0227	5.07099	7.12106	6.65434	9.32523	4.0838	5.85191	5.60621	5.61497	5.56957		8.35216	15.1716	10.3053	7.74816	9.50673	9.66504	10.4798	8.73735	7.89135	13.4796	10.1188	7.92563	10.1531	11.4801	9.41396	10.6119	12.0972	20.3898	7.28533	11.4478		9.16094	10.1877	9.65315	5.74419	16.5442	7.5253	19.0002	7.12104
7.20747	4.5995	7.32495	5.82444	7.84184	7.08761	10.3761	3.63141	8.05091	3.70747	6.9088	5.07538	7.10991	6.73557	9.32364	4.07145	5.84913	5.62532	5.63408	5.64046		8.43384	15.215	10.38	7.74413	9.49362	9.6721	10.4899	8.7424	7.88026	13.047	10.1228	7.91857	10.1924	11.5043	9.41396	10.5584	12.1002	20.3949	7.32163	11.5244		9.2083	10.1217	9.6447	5.74588	16.556	7.48809	19.0018	7.11258
7.20269	4.58874	7.42291	5.80691	7.74866	7.05734	10.4192	3.62743	8.05171	3.71265	6.88969	5.0929	7.133	6.75748	9.32443	4.07265	5.82165	5.62532	5.60024	5.74081		8.5256	15.2664	10.4515	7.74413	9.51076	9.70436	10.4889	8.7545	7.88026	12.9644	10.1773	7.94378	10.1944	11.5305	9.41396	10.5272	12.1153	20.411	7.3297	11.711		9.29626	10.0574	9.62271	5.75096	16.578	7.45933	19.0543	7.09398
7.19752	4.58436	7.48105	5.80731	7.69808	7.04181	10.4821	3.62544	8.05131	3.71106	6.92194	5.14268	7.14535	6.73597	9.3312	4.08021	5.7643	5.61378	5.58709	5.80293		8.67887	15.2926	10.4959	7.81875	9.54101	9.71747	10.4889	8.77265	7.89135	13.0985	10.2348	7.99319	10.2025	11.5688	9.40892	10.5383	12.1214	20.4413	7.41339	11.9974		9.39944	10.0253	9.60241	5.75265	16.5391	7.44918	19.1202	7.05169
7.19075	4.5768	7.45915	5.79776	7.66662	7.04221	10.5378	3.63062	8.03458	3.71106	6.96017	5.21396	7.17243	6.69735	9.33638	4.08459	5.72209	5.60621	5.59068	5.80572		8.85231	15.3088	10.5131	7.93572	9.54101	9.71646	10.4909	8.80693	7.92462	13.1912	10.2378	8.00832	10.2811	11.6041	9.39177	10.5473	12.1244	20.4998	7.46582	12.0064		9.40789	10.0016	9.66499	5.75434	16.419	7.44242	19.1439	7.01786
7.18597	4.57162	7.41813	5.73484	7.57264	7.04141	10.5948	3.60991	7.93144	3.71305	6.96376	5.24701	7.21464	6.69217	9.33439	4.09176	5.69143	5.60263	5.5847	5.78979		8.99045	15.3431	10.5231	7.94983	9.53294	9.72554	10.5231	8.85634	7.92866	13.2104	10.2216	8.00529	10.3507	11.598	9.35648	10.5635	12.1244	20.5804	7.50414	11.8683		9.40958	9.9999	10.1065	5.75773	16.3649	7.45933	19.171	6.94682
7.19274	4.56565	7.41176	5.61895	7.47826	7.04221	10.6402	3.5446	7.77335	3.71106	6.89248	5.24701	7.22898	6.69296	9.34992	4.09654	5.66594	5.60342	5.55842	5.79895		9.11649	15.3763	10.5312	7.92462	9.50874	9.7578	10.6078	8.89466	7.94378	13.2114	10.2227	7.99622	10.3689	11.5749	9.31514	10.6351	12.1284	20.654	7.56464	11.8663		9.49923	10.032	10.4481	5.75773	16.3581	7.47456	19.1896	6.80305
7.27636	4.55689	7.41296	5.519	7.45835	7.08203	10.6513	3.45141	7.69808	3.71464	6.73319	5.24821	7.22659	6.70531	9.39572	4.09335	5.65997	5.60462	5.51502	5.91045		9.24153	15.3915	10.5574	7.98815	9.46236	9.78503	10.6794	8.89768	7.99218	13.2104	10.2317	7.98613	10.3568	11.5446	9.27783	10.6925	12.1224	20.7065	7.56464	11.84		9.59057	10.0726	10.4735	5.75942	16.3496	7.47456	19.2116	6.74892
7.35999	4.53379	7.42291	5.45289	7.45915	7.10911	10.6517	3.40243	7.6953	3.71225	6.4604	5.204	7.21185	6.69496	9.43713	4.09415	5.65599	5.59386	5.47957	6.08448		9.35951	15.4126	10.6179	8.02949	9.39782	9.78806	10.7147	8.90172	8.0063	13.2084	10.2448	8.00731	10.3174	11.4841	9.22237	10.6936	12.1143	20.7619	7.67354	12.194		9.59057	10.1048	10.46	5.76111	16.3395	7.50669	19.3046	6.74554
7.40021	4.43463	7.42729	5.43218	7.4695	7.10553	10.6453	3.34111	7.71481	3.70827	6.17567	5.14148	7.14176	6.65912	9.46342	4.0388	5.62333	5.58431	5.4744	6.17248		9.45933	15.454	10.6875	7.97807	9.32623	9.79007	10.7369	8.91684	7.99924	13.2235	10.2761	8.06277	10.2529	11.4458	9.15179	10.7036	12.0992	20.8194	7.74615	13.0793		9.58719	10.1386	10.4464	5.73743	16.331	7.55913	19.3148	6.6542
7.40857	4.35379	7.43645	5.43099	7.49579	7.10115	10.627	3.24434	7.72357	3.71146	6.04824	5.1379	7.01672	6.62288	9.47735	3.88906	5.5859	5.57156	5.46962	6.18204		9.53496	15.5024	10.7379	7.94983	9.24758	9.80318	10.753	8.9239	8.00731	13.2507	10.3346	8.12428	10.2126	11.47	9.09935	10.7016	12.0851	20.8577	7.73606	13.8729		9.59226	10.1606	10.4397	5.70529	16.3243	7.52361	19.3215	6.50704
7.40857	4.31795	7.46194	5.41825	7.49977	7.08323	10.6023	3.19974	7.73512	3.72141	6.00125	5.16418	6.91717	6.6181	9.46063	3.858	5.54329	5.53493	5.45648	6.17766		9.61664	15.5346	10.7873	7.94782	9.24254	9.84351	10.7641	8.92793	8.02445	13.2659	10.4233	8.20091	10.2025	11.471	9.06305	10.7067	12.0962	20.894	7.73505	14.3559		9.62102	10.1538	10.4363	5.66639	16.326	7.37645	19.3198	6.42754
7.4038	4.30521	7.46273	5.41028	7.49977	7.08044	10.5446	3.20252	7.75065	3.7015	5.93514	5.17254	6.89606	6.62009	9.43952	3.8592	5.49072	5.54687	5.44334	6.17607		9.71344	15.5266	10.8529	7.91857	9.17296	9.86771	10.7762	8.92592	8.02546	13.2447	10.509	8.26444	10.1753	11.471	9.03784	10.7379	12.1345	20.9485	7.75119	14.5374		9.70051	10.1589	10.4363	5.61057	16.3124	7.25974	19.3198	6.45799
7.38627	4.28928	7.44322	5.40232	7.50056	7.07367	10.5151	3.16629	7.75025	3.62106	5.85351	5.17294	6.94026	6.62049	9.44271	3.8592	5.39117	5.50665	5.43179	6.17846		9.78604	15.5044	10.9214	7.86311	8.99146	9.8536	10.7883	8.92592	8.03857	12.9664	10.6199	8.24629	10.1359	11.4831	9.03078	10.7762	12.1657	20.9747	7.79152	14.5404		9.74618	10.1606	10.4126	5.58689	16.2921	7.19039	19.3283	6.54256
7.36796	4.26857	7.44083	5.40351	7.50056	7.07446	10.5155	3.10376	7.716	3.54141	5.78262	5.16697	6.98247	6.62168	9.44669	3.86358	5.18369	5.42422	5.45687	6.18403		9.83746	15.4994	10.9527	7.79455	8.91281	9.84351	10.7914	8.92692	8.0426	12.4985	10.8519	8.212	10.0805	11.4922	9.02776	10.8035	12.1799	20.9747	7.85202	14.492		9.80539	10.164	10.3856	5.58858	16.2854	7.12781	19.3317	6.64912
7.37791	4.25463	7.4472	5.33542	7.48941	7.10154	10.5195	3.09142	7.66702	3.5211	5.73762	5.16458	7.00716	6.63243	9.4443	3.84446	4.98219	5.45409	5.49471	6.26567		9.89091	15.5004	10.9658	7.729	8.91583	9.83948	10.7994	8.91583	8.04159	12.1486	11.111	8.22209	9.97157	11.5123	9.03885	10.8146	12.1799	20.9767	7.87723	14.4113		10.1944	10.1792	10.3974	5.58858	16.2837	7.10751	19.3148	6.68634
7.42092	4.24189	7.45198	5.14666	7.46831	7.11707	10.5211	3.0962	7.57065	3.5227	5.7201	5.15741	7.03544	6.6404	9.43713	3.75048	4.90932	5.48794	5.54767	6.38593		9.91107	15.5084	11.0122	7.70178	8.92087	9.83545	10.8115	8.87247	8.03958	11.9177	11.1957	8.22209	9.8415	11.5345	9.04692	10.8307	12.1829	20.9767	7.87723	14.3518		10.4718	10.2046	10.4008	5.57336	16.2803	7.14303	19.2539	6.67111
7.43725	4.24786	7.45079	5.07219	7.40061	7.08681	10.5223	3.0966	7.41415	3.51871	5.7201	5.14148	7.07048	6.61531	9.43514	3.57566	4.88861	5.51223	5.57913	6.44607		9.90805	15.5407	11.0787	7.67556	8.92188	9.83545	10.8156	8.82911	8.03958	11.8068	11.2058	8.22108	9.70537	11.5093	9.0449	10.8428	12.1617	20.9868	7.8732	14.3922		10.5293	10.2401	10.4025	5.57505	16.2786	7.14134	19.1896	6.67111
7.42928	4.24826	7.45557	5.07458	7.31619	6.97013	10.5115	3.09261	7.22101	3.50916	5.74479	5.13113	7.09796	6.58266	9.43434	3.53225	4.88582	5.52696	5.57953	6.44845		9.93427	15.5921	11.1282	7.5959	8.92289	9.83545	10.8004	8.77769	8.03756	11.8421	11.2471	8.22108	9.57933	11.4861	9.04389	10.8478	12.0689	21.0029	7.88126	14.5888		10.5598	10.2739	10.394	5.56828	16.2803	7.14303	19.1321	6.6745
7.42331	4.24866	7.46433	5.02361	7.26402	6.86579	10.4172	3.09261	7.03424	3.49801	5.77784	5.12953	7.10513	6.55876	9.43116	3.50438	4.88184	5.52378	5.57196	6.46677		9.97762	15.6365	11.1655	7.54347	8.91281	9.83444	10.7873	8.78071	8.03252	11.8481	11.3177	8.21604	9.51782	11.4801	9.03683	10.8609	11.9358	21.012	7.87622	14.8701		10.6308	10.2841	10.372	5.56828	16.2904	7.16164	19.0644	6.67111
7.41694	4.24866	7.47627	4.79662	7.23535	6.83951	10.3558	3.08505	6.88292	3.44265	5.76152	5.13192	7.09477	6.55598	9.42519	3.45818	4.84241	5.50944	5.564	6.51974		9.97964	15.6506	11.1987	7.52733	8.91079	9.84049	10.7783	8.7545	8.03151	11.831	11.3722	8.18377	9.52185	11.4054	9.0328	10.9073	11.8219	21.0181	7.84396	15.091		10.7509	10.2875	10.3365	5.56997	16.3006	7.15149	18.9951	6.62713
7.42052	4.23592	7.50694	4.38724	7.23176	6.83672	10.3523	3.08067	6.74832	3.35664	5.71094	5.13312	7.07765	6.57589	9.41881	3.44385	4.80418	5.46962	5.55683	6.53606		9.97157	15.6587	11.227	7.51423	8.9118	9.86671	10.7712	8.7555	8.03252	11.8209	11.4105	8.13335	9.51278	11.3288	9.03179	10.9779	11.7513	21.0211	7.81875	15.2604		10.8795	10.3027	10.279	5.57166	16.309	7.13288	18.9596	6.55271
7.40897	4.23711	7.51331	4.16225	7.23097	6.7515	10.3578	3.06713	6.61531	3.31363	5.69183	5.13391	7.07008	6.55279	9.41563	3.42911	4.76436	5.45488	5.55404	6.52292		9.97863	15.6617	11.2623	7.5112	8.90978	9.91007	10.7712	8.76962	8.04865	11.8532	11.4528	8.10714	9.53093	11.2613	9.03381	11.0475	11.6807	21.0221	7.80463	15.3794		11.0672	10.3314	10.2232	5.5649	16.3141	7.1684	18.9799	6.41739
7.32933	4.23552	7.48663	4.15587	7.23216	6.61212	10.3602	3.04323	6.51376	3.2746	5.72408	5.13272	7.10791	6.54244	9.41682	3.42872	4.71896	5.45767	5.55484	6.47952		9.98468	15.6617	11.3137	7.51019	8.90777	9.95746	10.7702	8.77668	8.07285	11.8693	11.473	8.1031	9.45127	11.2209	9.04288	11.0848	11.5718	21.0201	7.76934	15.3844		11.3412	10.4008	10.2046	5.55982	16.3074	7.19377	18.9613	6.29899
7.15331	4.19291	7.47986	4.17738	7.23216	6.58783	10.3678	3.07987	6.47952	3.21089	5.76112	5.12515	7.23136	6.55637	9.40965	3.41518	4.67994	5.45289	5.59068	6.47633		9.98872	15.7222	11.348	7.47893	8.90978	10.0028	10.7783	8.77466	8.08596	11.8723	11.4821	8.12125	9.23447	11.2502	9.04288	11.106	11.4508	21.017	7.68867	15.342		11.4715	10.4735	10.2266	5.55982	16.2515	7.20223	18.8919	6.23133
6.96495	4.15229	7.49061	4.22278	7.23017	6.58266	10.3893	3.05399	6.47991	3.19137	5.7878	5.08493	7.41972	6.5512	9.38775	3.41159	4.6429	5.4513	5.67749	6.47912		10.0099	15.8039	11.351	7.43961	8.93297	10.0371	10.7994	8.78676	8.08394	11.9036	11.4841	8.13335	9.02776	11.2804	9.03381	11.1161	11.35	21.015	7.68464	15.3471		11.4292	10.4921	10.2384	5.56152	16.145	7.20731	18.7295	6.25671
6.88889	4.1511	7.50295	4.22755	7.21225	6.58584	10.408	2.99983	6.47036	3.19217	5.7878	5.06383	7.66503	6.52053	9.36864	3.40642	4.60069	5.44931	5.70975	6.47872		10.028	15.8079	11.3641	7.40734	8.95919	10.0512	10.8065	8.72929	8.06378	11.9066	11.474	8.13537	8.87953	11.2239	9.02978	11.1161	11.2764	21.009	7.70178	15.3683		11.3666	10.4972	10.2401	5.56321	16.057	7.18701	18.4065	6.34635
6.8861	4.1511	7.5153	4.21959	7.15371	6.58744	10.4311	2.9847	6.44646	3.20252	5.81806	5.06423	7.89839	6.49903	9.36864	3.39487	4.57959	5.44811	5.72209	6.46279		10.0371	15.8271	11.4054	7.34381	8.96927	10.022	10.7571	8.65467	8.03151	11.8935	11.4599	8.1273	8.79181	11.0949	9.03482	11.1181	11.234	21.0029	7.69573	15.3199		11.3074	10.5141	10.2502	5.55813	15.9843	7.15994	18.2711	6.39371
6.88451	4.15189	7.58061	4.17061	7.04261	6.5731	10.4805	2.9847	6.43292	3.22682	5.87143	5.04631	8.00352	6.47155	9.34594	3.39208	4.576	5.44572	5.71652	6.4389		10.0533	15.8351	11.4417	7.25105	8.96625	9.99981	10.6885	8.63954	8.00126	11.8905	11.477	8.12428	8.75651	10.9971	9.03583	11.112	11.225	20.9939	7.67758	15.2745		11.2617	10.5327	10.257	5.55644	15.9386	7.16333	18.2694	6.40894
6.87655	4.13875	7.65468	4.11764	6.95818	6.52611	10.5211	2.97872	6.43651	3.23637	5.84236	4.95989	8.02383	6.48629	9.31129	3.39088	4.576	5.42462	5.68028	6.43611		10.0633	15.7504	11.466	7.20164	9.11952	10.0119	10.6401	8.6466	7.98916	11.9056	11.5184	8.12831	8.75651	10.9204	9.03381	11.0949	11.2088	20.9797	7.66245	15.2725		11.233	10.5462	10.257	5.55306	15.9505	7.14472	18.0428	6.41401
6.87615	4.11247	7.69291	4.09933	6.94823	6.47394	10.5183	2.97952	6.45483	3.23398	5.77784	4.89856	8.01149	6.53129	9.287	3.38491	4.55609	5.40351	5.64723	6.43611		10.0462	15.6647	11.4881	7.19458	9.27581	10.0412	10.5978	8.67181	8.01538	11.958	11.5335	8.12831	8.77063	10.9628	9.04087	11.0999	11.1423	20.9707	7.63926	15.2815		11.2245	10.5564	10.2553	5.54629	15.9454	7.1498	17.5793	6.41909
6.85544	4.11127	7.70963	4.06388	6.94743	6.45961	10.508	2.97912	6.4827	3.23876	5.75953	4.8906	7.95813	6.5281	9.23085	3.39327	4.49875	5.39913	5.62891	6.44168		10.0452	15.6345	11.5305	7.1855	9.29296	10.0381	10.5433	8.67585	8.07689	12.0276	11.5053	8.12932	8.72525	11.0455	9.03583	11.0989	11.0586	20.9686	7.59691	15.2836		11.233	10.5564	10.257	5.5446	15.8168	7.1498	17.1751	6.43093
6.81243	4.09574	7.70884	4.04875	6.94504	6.4389	10.5127	2.97912	6.51217	3.23677	5.75992	4.89179	7.90755	6.5289	9.15519	3.40323	4.38207	5.40431	5.63926	6.44487		10.0684	15.6183	11.5991	7.17038	9.28691	10.0664	10.4909	8.67585	8.10814	12.0468	11.4488	8.13033	8.67887	11.0949	9.02272	11.0697	11.0072	20.9606	7.56162	15.2886		11.2567	10.5513	10.2604	5.53107	15.668	7.15487	17.1142	6.45461
6.79332	4.06428	7.7176	4.04477	6.94663	6.3935	10.5625	2.96837	6.52531	3.26305	5.77307	4.88702	7.88366	6.51376	9.18386	3.41438	4.28171	5.38201	5.66077	6.4393		10.0795	15.5921	11.6706	7.1855	9.28892	10.0795	10.4546	8.71013	8.14848	12.0508	11.3651	8.13234	8.67887	11.1584	9.00053	11.0556	10.9537	20.9555	7.51423	15.2826		11.3226	10.5327	10.2536	5.51077	15.6747	7.15487	17.1243	6.47998
6.79172	4.05074	7.75623	4.04278	6.94663	6.37797	10.6449	2.95841	6.52452	3.2762	5.82045	4.89299	7.86175	6.49783	9.26709	3.4088	4.24149	5.35851	5.66355	6.43014		10.0946	15.577	11.7503	7.2218	9.29296	10.0845	10.4526	8.82609	8.16663	12.1143	11.3238	8.10209	8.68492	11.2199	8.9239	11.0556	10.8599	20.9485	7.45171	15.2715		11.4546	10.5141	10.2536	5.51246	15.6308	7.1684	17.1243	6.50366
6.80726	4.03043	7.83268	4.03481	6.94743	6.37757	10.684	2.97155	6.54363	3.27938	5.8547	4.90852	7.82313	6.49823	9.31488	3.39965	4.20565	5.35971	5.66395	6.44527		10.1309	15.578	11.83	7.24096	9.29396	10.1148	10.4697	8.90373	8.1636	12.1768	11.3006	8.02647	8.67685	11.2572	8.80693	11.0556	10.7611	20.9303	7.40835	15.2664		11.6136	10.5344	10.2519	5.53445	15.5919	7.24283	17.1176	6.51042
6.82796	4.00136	7.92627	4.01889	6.94106	6.37717	10.6529	2.98947	6.5719	3.28137	5.86466	4.891	7.81556	6.49266	9.32523	3.40004	4.14313	5.35732	5.66196	6.47354		10.1369	15.5568	11.8663	7.23693	9.29094	10.145	10.4515	8.94608	8.16259	12.191	11.2562	8.00025	8.67585	11.2814	8.72828	11.0556	10.6996	20.9081	7.36701	15.2563		11.6711	10.5801	10.2502	5.53276	15.5445	7.33755	17.0448	6.49182
6.81482	4.00216	7.94658	4.01889	6.91836	6.35646	10.6115	2.98549	6.58943	3.28575	5.86744	4.88502	7.80083	6.49664	9.32643	3.40363	4.11605	5.34577	5.66316	6.46837		10.1067	15.4651	11.8653	7.21979	9.29094	10.1642	10.4031	9.00356	8.18276	12.1728	11.228	8.00025	8.67685	11.2713	8.68996	11.0394	10.6603	20.896	7.22987	15.2452		11.6609	10.6004	10.2502	5.5649	15.4176	7.36799	16.8368	6.47998
6.78456	3.94203	7.93343	4.00296	6.87416	6.33496	10.6203	2.95961	6.60575	3.28217	5.86067	4.88224	7.72158	6.50022	9.332	3.3877	4.08499	5.35015	5.65559	6.43452		10.1107	15.2614	11.8451	7.19055	9.29901	10.1753	10.4011	9.02776	8.1999	12.1415	11.2058	7.99622	8.67585	11.2542	8.67988	11.0253	10.623	20.8849	7.04333	15.2452		11.6406	10.5987	10.2604	5.60042	15.2299	7.37476	16.6253	6.4749
6.77022	3.90818	7.93343	4.00415	6.83513	6.33536	10.6191	2.95801	6.61571	3.2746	5.84594	4.89777	7.62879	6.47434	9.3312	3.31323	4.05592	5.3621	5.64205	6.39987		10.1259	14.978	11.8279	7.15223	9.29901	10.1702	10.4415	9.05196	8.20192	12.1405	11.1564	8.0547	8.67282	11.2129	8.6819	11.0203	10.5554	20.8688	6.97577	15.2261		11.5882	10.5953	10.2621	5.6038	15.0557	7.36969	16.5154	6.47152
6.77022	3.90818	7.92746	4.00574	6.83155	6.33735	10.6175	2.95881	6.60496	3.24713	5.81448	4.85197	7.56149	6.46916	9.3312	3.26624	4.05672	5.36847	5.64484	6.37438		10.1319	14.6473	11.8068	7.13609	9.30203	10.1702	10.4435	9.13969	8.20797	12.1486	11.115	8.16461	8.66374	11.0717	8.68593	11.0041	10.4566	20.8547	6.97577	15.2029		11.5222	10.6021	10.2621	5.58351	14.8442	7.35277	16.4528	6.45968
6.75628	3.89623	7.92667	4.02406	6.85385	6.33058	10.5796	2.96239	6.60934	3.19177	5.79895	4.71219	7.49857	6.48748	9.33001	3.21965	4.07185	5.37046	5.67869	6.35885		10.1632	14.1885	11.7725	7.1371	9.30606	10.1702	10.4193	9.15279	8.21301	12.0992	11.1261	8.25738	8.65366	10.8256	8.70408	10.9739	10.3739	20.8396	6.97677	15.1837		11.463	10.6156	10.2722	5.4854	14.5026	7.33078	16.4038	6.45799
6.71447	3.88468	7.92706	4.04397	6.78177	6.32102	10.4928	2.96239	6.61332	3.13045	5.8105	4.68153	7.41335	6.50062	9.3316	3.12527	4.11088	5.36847	5.73284	6.35885		10.2116	13.6763	11.7483	7.13912	9.30707	10.1753	10.4354	9.15884	8.22612	12.1113	11.1463	8.27553	8.64559	10.5191	8.71013	10.988	10.3608	20.8255	6.96165	15.1686		11.4376	10.6393	10.2858	5.37884	14.2235	7.31725	16.3818	6.43938
6.68301	3.88707	7.92428	4.05313	6.52412	6.31664	10.3714	2.96239	6.60336	3.08067	5.80771	4.68153	7.31778	6.49186	9.34395	3.06753	4.19689	5.36688	5.77346	6.2808		10.2307	13.4746	11.7271	7.14517	9.30808	10.1753	10.4788	9.18607	8.24225	12.1738	11.1352	8.3804	8.64257	10.1672	8.68895	11.0404	10.3225	20.8043	6.94148	15.1505		11.4715	10.6579	10.323	5.34501	14.1406	7.31048	16.3818	6.36834
6.66748	3.89066	7.93423	4.06906	6.35208	6.30828	10.3009	2.96279	6.58146	3.05996	5.83479	4.68312	7.23216	6.47394	9.35629	3.02253	4.39481	5.36887	5.78979	6.21071		10.2327	13.4927	11.6918	7.15122	9.30808	10.1753	10.506	9.22035	8.24225	12.201	11.0848	8.46712	8.63249	10.0654	8.67685	11.0707	10.2509	20.775	6.91627	15.1565		11.3362	10.6765	10.4025	5.36023	14.1101	7.30372	16.3818	6.34804
6.65951	3.83291	7.9422	4.07942	6.33058	6.26846	10.2945	2.96239	6.55836	3.06872	5.89333	4.65764	7.13818	6.46438	9.35828	2.96478	4.54773	5.35254	5.79059	6.2139		10.2378	13.5311	11.6616	7.15929	9.30707	10.1773	10.5211	9.26775	8.24326	12.193	10.991	8.48426	8.62039	10.26	8.67786	11.0999	10.2166	20.7529	6.86384	15.1686		11.0824	10.6714	10.4938	5.36869	14.0899	7.29864	16.3395	6.34804
6.66031	3.73336	7.93105	4.07822	6.34412	6.15456	10.3371	2.9397	6.54761	3.06115	5.90687	4.58596	7.06769	6.47076	9.37103	2.98868	4.61742	5.32307	5.78621	6.22744		10.2509	13.5512	11.6394	7.16029	9.30606	10.1743	10.5262	9.3101	8.24024	12.1536	10.8993	8.44897	8.61938	10.6603	8.66576	11.1292	10.2025	20.7458	6.82653	15.1686		10.9437	10.6579	10.5733	5.367	14.0899	7.29526	15.9572	6.34974
6.65673	3.7238	7.93742	4.07703	6.32819	6.11713	10.375	2.90585	6.54283	3.05797	5.90767	4.56844	7.0446	6.43969	9.38536	3.005	4.66202	5.33462	5.7874	6.22306		10.2579	13.5452	11.598	7.16029	9.30606	10.1763	10.5231	9.31514	8.23822	12.1325	10.7924	8.39149	8.61736	11.2592	8.63753	11.1312	10.0845	20.7397	6.81544	15.1656		10.8828	10.6816	10.6968	5.3467	14.0865	7.24959	15.2282	6.32944
6.63642	3.65451	7.93861	4.06986	6.28598	6.11952	10.3566	2.90306	6.54283	3.05757	5.91045	4.57879	7.07207	6.43492	9.39094	2.97354	4.67994	5.32546	5.7866	6.19797		10.2569	13.5411	11.5496	7.15626	9.30808	10.1732	10.5221	9.30707	8.24024	12.2313	10.6391	8.38443	8.63148	11.9056	8.60526	11.1029	9.88587	20.7226	6.78418	15.1575		10.849	10.6849	10.8828	5.34501	14.122	7.12104	14.6751	6.30576
6.61412	3.5677	7.93662	4.07026	6.22903	6.1235	10.3387	2.89748	6.53447	3.05916	5.90289	4.59392	7.14017	6.42655	9.38815	2.97354	4.67835	5.33502	5.80014	6.18443		10.2559	13.5442	11.5063	7.16029	9.3101	10.1813	10.5262	9.298	8.2352	12.4229	10.5242	8.40157	8.64862	12.3714	8.58106	11.0556	9.70234	20.7034	6.71561	15.1545		10.8473	10.6697	11.0215	5.34332	14.1693	6.98403	14.3334	6.30576
6.60217	3.56411	7.93821	4.0611	6.18324	6.13226	10.3658	2.89032	6.53168	3.06832	5.8778	4.60507	7.16367	6.3931	9.3774	2.95284	4.67874	5.34657	5.83121	6.05541		10.26	13.5704	11.5073	7.16534	9.29497	10.1944	10.5332	9.28287	8.2352	12.5691	10.4788	8.43888	8.64862	12.4753	8.56694	11.0354	9.55008	20.6792	6.66519	15.1817		10.8795	10.6579	11.0418	5.33486	13.9224	6.85041	14.1541	6.31929
6.60336	3.44544	7.9406	4.06428	6.18005	6.13187	10.4347	2.88992	6.54562	3.07708	5.83519	4.53658	7.14535	6.35408	9.31647	2.96518	4.69308	5.35015	5.89054	5.9451		10.26	13.5694	11.5355	7.17239	9.26472	10.1864	10.5352	9.30102	8.2352	12.6377	10.4485	8.4772	8.64963	12.2605	8.56291	11.0354	9.42908	20.6369	6.64503	15.217		10.915	10.6697	11.03	5.30949	13.5773	6.7134	14.1321	6.31929
6.60097	3.34867	7.91233	4.03442	6.17806	6.12948	10.4319	2.89231	6.5504	3.07788	5.77585	4.43463	7.13898	6.36602	9.1516	2.96319	4.69865	5.35174	5.96262	5.90886		10.262	13.4463	11.5507	7.18449	9.2496	10.1299	10.5363	9.34236	8.2352	12.6508	10.4132	8.49031	8.64257	11.9177	8.56089	11.0354	9.31111	20.5794	6.60671	15.2251		10.9336	10.69	11.0148	5.28412	13.3118	6.64574	14.1288	6.32267
6.58505	3.3212	7.80083	3.96194	6.17248	6.13784	10.2774	2.8708	6.55	3.06912	5.71652	4.3976	7.16805	6.38673	8.94532	2.96319	4.69228	5.34975	6.01359	5.90806		10.262	13.282	11.5466	7.20769	9.2496	10.0875	10.5373	9.33631	8.23923	12.6094	10.4183	8.47821	8.68593	11.71	8.57199	11.0414	9.177	20.5522	6.53713	15.2372		10.937	10.7019	11.0232	5.26044	13.2018	6.65082	14.1203	6.32267
6.56314	3.33991	7.63516	3.90061	6.17288	6.08687	10.085	2.85169	6.54881	3.06315	5.65639	4.41193	7.18238	6.40425	8.80475	2.96797	4.69268	5.34617	6.05222	5.90567		10.263	13.1781	11.5285	7.2571	9.2506	10.0875	10.5393	9.34539	8.24427	12.5429	10.4899	8.43687	8.7555	11.9842	8.57098	11.0324	9.02877	20.529	6.47562	15.2654		10.9404	10.6951	11.1163	5.23506	13.2086	6.66773	14.1203	6.32098
6.55438	3.3423	7.493	3.87951	6.17846	6.0562	9.96358	2.84014	6.54682	3.05438	5.59506	4.4187	7.18875	6.40505	8.70042	2.99146	4.69666	5.34736	6.09045	5.89014		10.264	12.9291	11.4871	7.29945	9.24455	10.0533	10.5322	9.36152	8.25335	12.5106	10.5857	8.47619	8.74845	12.5782	8.53871	10.9698	8.84827	20.5149	6.35765	15.2735		10.9471	10.7171	11.1856	5.21815	13.2137	6.6542	14.0949	6.32267
6.54044	3.34111	7.36676	3.88906	6.18364	6.07054	9.91341	2.82899	6.54443	3.04363	5.54966	4.41751	7.18437	6.40744	8.65183	3.04523	4.73051	5.34059	6.10359	5.87143		10.2781	12.5378	11.4196	7.32163	9.23649	10.0079	10.5262	9.34539	8.2473	12.4904	10.6502	8.5377	8.73534	12.9583	8.52661	10.874	8.67282	20.5139	6.12573	15.2745		10.9607	10.734	11.2583	5.21477	13.2154	6.61699	14.0205	6.31422
6.49067	3.3431	7.27756	3.86477	6.18642	6.07572	9.90744	2.827	6.53288	3.04801	5.53851	4.37211	7.17083	6.40704	8.67931	3.11491	4.79064	5.30316	6.1028	5.85868		10.3063	12.2262	11.3238	7.34381	9.23044	10.0049	10.5191	9.34035	8.24326	12.4804	10.6704	8.51753	8.7182	13.0591	8.5256	10.8105	8.54577	20.5048	5.99968	15.2795		10.9708	10.6934	11.3311	5.208	13.2086	6.60345	13.9342	6.27869
6.42815	3.32	7.23097	3.83132	6.18483	6.07014	9.92575	2.82182	6.51615	3.0512	5.53931	4.29804	7.17601	6.40545	8.67453	3.13323	4.9121	5.26095	6.09244	5.85669		10.3295	12.0841	11.2078	7.34785	9.22237	10.0119	10.4757	9.35547	8.2483	12.4804	10.6724	8.43989	8.694	13.0531	8.54173	10.747	8.4409	20.4937	5.99162	15.2805		10.9742	10.5632	11.3581	5.19954	13.1765	6.60684	13.9393	6.22626
6.38912	3.30805	7.1796	3.80185	6.18682	6.06895	9.96996	2.75173	6.52013	3.03447	5.54289	4.29804	7.18637	6.38315	8.60922	3.08943	5.16537	5.25697	6.05142	5.85669		10.3618	12.0679	11.1292	7.36196	9.21733	10.0442	10.4122	9.54807	8.24024	12.4834	10.6744	8.42678	8.67988	13.0642	8.58509	10.6502	8.41367	20.4856	5.99968	15.2836		10.9742	10.3822	11.3717	5.22322	13.3659	6.64236	13.9748	6.19581
6.35885	3.37695	7.12345	3.79946	6.17248	6.06496	9.95243	2.6916	6.53885	3.00381	5.5409	4.31596	7.19592	6.36841	8.49812	3.04284	5.55882	5.25617	6.00085	5.82802		10.4213	12.0589	11.109	7.39927	9.20624	10.1097	10.3578	9.82738	8.22007	12.4642	10.6734	8.41166	8.66778	13.1378	8.63148	10.627	8.45905	20.4887	6.00372	15.2957		10.9759	10.2469	11.3734	5.25536	13.8717	6.71678	13.9968	6.18397
6.33456	3.4327	7.11389	3.76402	6.11474	6.06735	9.84252	2.69359	6.54642	2.99903	5.53214	4.24786	7.2019	6.36124	8.35436	3.02292	5.98612	5.24582	5.98253	5.74121		10.4626	12.0236	11.111	7.39222	9.19918	10.1309	10.3104	10.0341	8.21301	12.4572	10.6633	8.35721	8.61434	13.3334	8.64559	10.6532	8.43787	20.4967	6.00674	15.3088		10.9776	10.1471	11.4055	5.27059	14.1677	6.81489	13.9934	6.16537
6.32142	3.43469	7.14216	3.725	6.07054	6.06536	9.72465	2.67806	6.54682	2.99784	5.5186	4.15627	7.19672	6.33496	8.2544	3.02332	6.3266	5.17573	5.98134	5.59307		10.4536	11.9873	11.115	7.36801	9.20422	10.1289	10.2842	10.2277	8.20898	12.4602	10.6623	8.32292	8.54778	13.5845	8.64761	10.6351	8.33906	20.4907	6.00775	15.333		10.9776	10.0709	11.5662	5.27397	14.1795	6.90961	13.9833	6.13661
6.31744	3.36221	7.15849	3.725	6.06138	6.06098	9.61355	2.60598	6.54721	2.99823	5.50944	4.13835	7.18995	6.26248	8.2321	3.02213	6.5046	5.06144	5.98731	5.45687		10.4415	11.9389	11.1029	7.3539	9.19212	10.0956	10.2771	10.3921	8.20696	12.4562	10.6653	8.32091	8.49636	13.7418	8.65164	10.6452	8.22007	20.4685	5.94927	15.3935		10.9759	10.0168	11.578	5.26213	14.1558	6.94682	13.9833	6.12308
6.33616	3.35743	7.15889	3.71106	6.07452	6.06576	9.5347	2.53908	6.54761	2.99704	5.50705	4.14512	7.178	6.22505	8.26874	3.01615	6.60177	5.04033	5.99408	5.4286		10.4354	11.9489	11.0354	7.36701	9.15279	10.0311	10.269	10.4132	8.20495	12.4531	10.6653	8.32091	8.41872	13.7942	8.65669	10.6683	8.11621	20.4655	5.78793	15.454		10.9759	9.99821	11.4241	5.25367	14.0899	6.94851	13.9782	6.15522
6.31465	3.36978	7.16964	3.68995	6.10479	6.06974	9.51917	2.5359	6.55319	2.99704	5.50307	4.13756	7.14973	6.29235	8.32131	3.00939	6.65195	5.0029	6.00563	5.4282		10.4324	11.9933	10.9174	7.39726	9.09128	9.98973	10.2519	10.3568	8.20898	12.4521	10.6613	8.32191	8.32696	13.7932	8.66173	10.7682	8.01538	20.4776	5.62357	15.4681		10.9759	10.0033	11.3142	5.25536	14.1389	6.94851	13.9714	6.17044
6.2804	3.365	7.13898	3.66088	6.12191	6.06417	9.53032	2.53032	6.58305	2.98828	5.49949	4.14353	7.1338	6.37677	8.36631	2.99863	6.67544	4.7787	6.04943	5.41028		10.4314	12.0064	10.8146	7.42952	8.98642	9.98468	10.2348	10.3225	8.22209	12.4481	10.6895	8.32595	8.2594	13.8346	8.66879	10.9366	7.95084	20.5008	5.54794	15.457		10.9776	10.0117	11.2871	5.25705	14.4332	6.91976	13.9714	6.15014
6.27642	3.32319	7.07646	3.63898	6.11195	6.04027	9.54107	2.51718	6.61929	2.98151	5.4967	4.14512	7.1346	6.417	8.3906	2.99306	6.67743	4.49755	6.08687	5.35095		10.4233	11.9611	10.7409	7.45877	8.90373	9.99578	10.2206	10.3124	8.21805	12.439	10.7339	8.31385	8.26545	13.8547	8.6698	10.987	7.93975	20.5139	5.51063	15.4409		10.9776	10.0151	11.2905	5.25705	14.4248	6.86901	13.9782	6.1197
6.27722	3.31761	7.0446	3.63579	6.1016	6.03908	9.55421	2.51519	6.5962	2.9831	5.50148	4.14114	7.11946	6.33536	8.3675	2.98828	6.66827	4.38087	6.10519	5.29838		10.4092	11.955	10.6946	7.46078	8.8997	10.0008	10.2106	10.3174	8.15957	12.443	10.7803	8.28763	8.30981	13.8416	8.67181	10.9396	7.96899	20.5361	5.46526	15.4116		10.9809	10.0117	11.304	5.27397	14.1017	6.81827	13.9951	6.10617
6.27523	3.31482	7.04619	3.62703	6.102	6.02793	9.56934	2.50404	6.54881	2.99465	5.51064	4.14114	7.12026	6.24695	8.33325	2.97793	6.65394	4.37928	6.1251	5.29002		10.3991	12.078	10.6673	7.45776	8.88861	10.017	10.1904	10.3114	8.1273	12.4763	10.8115	8.28561	8.29973	13.8699	8.6819	10.8851	8.02546	20.5582	5.41182	15.3773		10.986	9.99483	11.3362	5.27397	13.5943	6.75399	14.012	6.13661
6.26089	3.33155	7.03504	3.54062	6.10678	6.00881	9.56297	2.48691	6.5735	3.0277	5.50745	4.13995	7.12424	6.21748	8.33604	2.96638	6.64319	4.36295	6.13107	5.28882		10.3951	12.081	10.6139	7.4628	8.84928	10.0351	10.1753	10.2932	8.13234	12.5217	10.8125	8.28158	8.2594	13.9324	8.694	10.8025	8.08394	20.5673	5.35736	15.3491		10.9877	9.95254	11.3581	5.27397	13.0767	6.70663	14.0205	6.16029
6.22664	3.32916	7.03584	3.35942	6.1235	6.01081	9.5574	2.50483	6.64358	3.1189	5.50586	4.09534	7.12504	6.22067	8.3452	2.96717	6.61929	4.34822	6.13107	5.29759		10.3961	12.0337	10.5433	7.43557	8.81701	10.0321	10.1591	10.3447	8.12629	12.5741	10.8125	8.29469	8.21402	13.9828	8.695	10.6149	8.10714	20.6036	5.31602	15.335		10.9894	9.92886	11.3598	5.33148	12.7756	6.68295	14.029	6.16537
6.18364	3.29412	7.05654	3.25151	6.15456	5.99806	9.5574	2.51678	6.73199	3.19615	5.49033	4.04676	7.13101	6.14779	8.33883	2.98111	6.55637	4.35459	6.15098	5.2932		10.383	12.0024	10.4505	7.38717	8.79181	10.0311	10.0966	10.3578	8.1273	12.6215	10.8125	8.36124	8.13638	14.006	8.69601	10.4899	8.10814	20.653	5.31199	15.3471		10.9945	9.9221	11.3548	5.36362	12.5371	6.65082	14.0357	6.1586
6.15616	3.3204	7.06053	3.24434	6.17607	5.9678	9.5574	2.52753	6.80327	3.21487	5.50586	4.04557	7.13778	5.99169	8.28666	2.99226	6.50142	4.35578	6.12868	5.27767		10.3537	12.0084	10.3295	7.35491	8.81399	10.0422	9.89292	10.2872	8.12932	12.6266	10.8125	8.46107	7.98109	14.007	8.695	10.5605	8.10209	20.6863	5.31602	15.3894		10.9996	9.91871	11.3446	5.36362	12.3679	6.60515	14.0273	6.0791
6.15815	3.33314	7.06053	3.23876	6.16492	5.92678	9.50563	2.512	6.81283	3.22522	5.53771	4.03004	7.15451	5.89413	8.20702	2.99226	6.46996	4.35658	6.04426	5.27051		10.3164	11.9883	10.2287	7.33272	8.87651	10.0502	9.64184	10.1964	8.13033	12.6185	10.8135	8.65568	7.86715	14.0977	8.694	10.6946	8.09604	20.7115	5.2777	15.4267		11.0012	9.9204	11.3869	5.39068	12.3747	6.58485	14.0239	5.98269
6.16293	3.28934	7.05216	3.21766	6.15974	5.89492	9.36466	2.49687	6.80287	3.23956	5.56201	4.02366	7.17322	5.86306	8.16042	2.99983	6.45323	4.35618	5.92678	5.28843		10.2781	11.9883	10.1642	7.3297	8.90272	9.92822	9.53496	10.1047	8.11218	12.6135	10.8065	9.0691	7.83085	14.4123	8.69097	10.7823	8.10512	20.7176	5.25451	15.4358		11.0029	9.88827	11.5002	5.38899	12.3274	6.60007	14.0222	5.981
6.15377	3.31562	7.04898	3.19137	6.20355	5.88497	9.0636	2.50523	6.81203	3.2304	5.60342	4.00734	7.18238	5.85829	8.13613	3.02332	6.47036	4.34065	5.81329	5.34975		10.2398	11.9994	10.1168	7.3297	8.85331	9.7084	9.50673	10.1097	8.04663	12.5923	10.8004	9.58134	7.79253	14.613	8.68895	10.8014	8.0789	20.7095	5.24544	15.4388		11.0029	9.82061	11.5425	5.42112	12.2681	6.61868	14.0019	5.96408
6.13704	3.36181	7.07805	3.17544	6.24616	5.88497	8.68289	2.50523	6.8188	3.2304	5.67032	4.00296	7.18437	5.86187	8.11542	3.04244	6.49345	4.31437	5.71851	5.38719		10.2287	12.0135	10.0795	7.27726	8.71416	9.57227	9.46236	10.2297	7.96597	12.5499	10.7924	9.9988	7.78245	14.6654	8.69601	10.75	8.00529	20.7236	5.22023	15.4318		11.0029	9.74618	11.5577	5.4262	12.2529	6.59669	14.1186	5.9607
6.13983	3.36858	7.09039	3.15872	6.26886	5.88696	8.48259	2.48492	6.77341	3.22721	5.71492	3.98981	7.18517	5.8555	8.10069	3.02292	6.51695	4.3064	5.64285	5.40033		10.2297	12.0175	10.0341	7.10584	8.574	9.48152	9.38371	10.3527	7.90042	12.5076	10.7823	10.1622	7.87824	14.6806	8.69601	10.6341	7.96496	20.7418	5.18191	15.4187		11.0012	9.65485	11.5933	5.41267	12.258	6.52903	14.2793	5.97761
6.15855	3.38252	7.07287	3.13801	6.29673	5.88019	8.4113	2.48891	6.72044	3.20252	5.73723	3.98822	7.18995	5.80652	8.09233	2.98828	6.49823	4.31039	5.61895	5.40988		10.2307	12.0125	9.98267	7.03526	8.44594	9.45429	9.3222	10.3991	7.85202	12.4773	10.7954	10.0018	7.91757	14.6856	8.69097	10.5524	7.97101	20.7609	5.18393	15.3985		11.0012	9.59564	11.6152	5.41605	12.2952	6.40555	14.3791	5.96916
6.15934	3.40681	7.04659	3.14199	6.32779	5.86665	8.39139	2.48891	6.68938	3.16629	5.76391	3.98902	7.18915	5.70139	8.08357	2.99186	6.39947	4.33468	5.61776	5.43218		10.2267	11.9994	9.94939	7.03324	8.32292	9.53395	9.27783	10.4253	7.82984	12.444	10.8458	9.80116	7.83791	14.7017	8.68089	10.503	7.9942	20.771	5.20712	15.3753		10.9996	9.59057	11.6423	5.4262	12.3527	6.26347	14.4281	5.9201
6.12669	3.42473	7.03703	3.14399	6.3481	5.86227	8.40055	2.48452	6.65912	3.16629	5.78023	3.99061	7.18637	5.60103	8.08396	2.98868	6.32262	4.3745	5.60382	5.49909		10.1954	11.9802	9.91309	7.02316	8.24931	9.68924	9.23346	10.4747	7.8248	12.436	10.8529	9.70134	7.79354	14.7955	8.68089	10.4596	8.03151	20.7508	5.21519	15.3531		10.9962	9.59395	11.7049	5.43804	12.3882	6.20089	14.4349	5.88458
6.09603	3.42035	7.02349	3.14	6.33217	5.85948	8.34799	2.47337	6.60854	3.18739	5.77745		7.19035	5.55922	8.09432	2.96916	6.27881	4.4199	5.59745	5.53692		10.148	11.9016	9.87175	6.99493	8.26545	9.95645	9.21632	10.5252	7.82984	12.4662	10.8327	9.66907	7.84799	14.9135	8.68089	10.4465	8.14444	20.7287	5.17788	15.3531		10.9962	9.57535	11.7387	5.43127	12.3933	6.17552	14.4383	5.85583
6.09364	3.42473	7.02429	3.11969	6.31147	5.85948	8.26954	2.45665	6.55319	3.18819	5.78222		7.19154	5.55723	8.09631	2.91381	6.22505	4.46091	5.59745	5.54608		10.1087	11.7765	9.86872	6.98787	8.31687	10.4294	9.1901	10.5121	7.87522	12.5025	10.8317	9.67109	7.90446	15.0305	8.67887	10.4737	8.36326	20.7186	5.19603	15.3824		10.9979	9.48908	11.7945	5.42789	12.3916	6.15014	14.4806	5.80339
6.09483	3.37217	7.01035	3.11452	6.31147	5.83758	8.19786	2.46262	6.54483	3.19575	5.78063		7.20508	5.54687	8.09631	2.87439	6.18403	4.49476	5.58232	5.64922		10.0754	11.6727	9.88284	6.98383	8.35519	10.9386	9.11851	10.509	7.89437	12.5267	10.8347	9.65495	7.91051	15.218	8.70912	10.5322	8.54778	20.7004	5.19099	15.4106		10.9996	9.39944	11.9248	5.4262	12.3916	6.15691	14.6193	5.73404
6.09563	3.22522	6.98128	3.13921	6.31306	5.81926	8.17038	2.46621	6.56195	3.21288	5.78103		7.23136	5.50267	8.09312	2.8935	6.17288	4.50591	5.56161	5.7205		10.0371	11.6243	9.85158	6.96064	8.39048	11.3611	8.97532	10.626	7.89538	12.5277	10.8367	9.60554	7.8369	15.4651	8.78979	10.5796	8.60627	20.6732	5.24745	15.4348		11.0012	9.35715	12.1379	5.3264	12.4102	6.17044	14.8984	5.66639
6.09443	3.15195	6.97013	3.17226	6.3027	5.81926	8.18989	2.46899	6.57708	3.20531	5.78143		7.2465	5.4728	8.076	2.91301	6.15974	4.53498	5.53971	5.72767		10.0018	11.5779	9.74873	6.95459	8.42275	11.708	8.86239	10.7379	7.90345	12.5207	10.87	9.5521	7.70783	15.7081	8.87348	10.6018	8.62644	20.6399	5.35232	15.4741		11.008	9.33685	12.4373	5.1691	12.4982	6.18397	15.2789	5.62917
6.08806	3.13045	6.97093	3.21447	6.28558	5.8097	8.22733	2.46302	6.57708	3.20213	5.78222		7.26203	5.46086	8.06087	2.93691	6.1462	4.56286	5.53931	5.72209		9.97157	11.471	9.7447	6.93342	8.46006	11.7826	8.79281	10.7924	7.90446	12.5106	10.8861	9.46639	7.5959	15.9007	8.88659	10.5594	8.69702	20.5593	5.38156	15.5266		11.0148	9.31994	12.7637	5.15895	12.625	6.12477	15.7695	5.62072
6.07412	3.12806	6.96893	3.23359	6.26248	5.81528	8.24166	2.44032	6.5504	3.20013	5.78143		7.27198	5.43537	8.06087	2.93571	6.13664	4.57043	5.5417	5.71373		9.93326	11.2723	9.781	6.89107	8.49132	11.8269	8.7071	10.8277	7.9095	12.5277	10.8529	9.419	7.45776	15.9803	8.87751	10.5544	8.82811	20.3939	5.3856	15.58		11.0249	9.2489	12.9955	5.15387	12.7232	6.06557	16.2448	5.61395
6.0335	3.10655	6.95539	3.23438	6.24297	5.83519	8.23688	2.42877	6.52252	3.19814	5.78581		7.26243	5.4071	8.05211	2.9385	6.12987	4.56963	5.53891	5.68824		9.902	10.9557	9.74873	6.87896	8.5014	11.9943	8.59114	10.8256	7.91152	12.554	10.8317	9.49765	7.32566	15.9924	8.88054	10.6119	8.9602	20.2517	5.38156	15.6274		11.0368	9.10005	13.1832	5.13865	12.7824	6.07234	16.5053	5.61564
5.96063	3.06872	6.94385	3.18938	6.24934	5.81647	8.22255	2.42838	6.51496	3.19735	5.78461		7.26004	5.40511	8.04852	2.92496	6.12828	4.56804	5.50506	5.67072		9.87881	10.5655	9.7084	6.88098	8.50745	12.0074	8.4772	10.8539	7.90446	12.553	10.8125	9.65294	7.26214	16.0045	8.89869	10.7208	9.07414	20.1942	5.38661	15.6597		11.0385	9.0104	13.2999	5.05408	12.8128	6.07234	16.6186	5.61226
5.8782	3.08983	6.95539	3.19177	6.26766	5.75515	8.18671	2.42121	6.51137	3.21009	5.75753		7.26004	5.40351	8.04852	2.97235	6.12828	4.56485	5.47121	5.68705		9.85158	10.4284	9.65394	6.89308	8.52157	11.8804	8.36628	10.8609	7.89942	12.5439	10.7601	9.67814	7.22987	16.0287	8.90071	10.8458	9.13464	20.1751	5.38156	15.6758		11.0435	8.96642	13.2898	4.85956	12.8196	6.08079	16.7404	5.61057
5.81607	3.13244	6.99124	3.19735	6.27483	5.73324	8.14887	2.4009	6.50381	3.25031	5.69143		7.27636	5.40351	8.04972	3.07987	6.12908	4.53578	5.44692	5.69979		9.83041	10.4273	9.59445	6.87896	8.49434	11.7231	8.25637	10.7722	7.90042	12.5308	10.7238	9.71344	7.20063	16.0398	8.89163	10.9114	9.15884	20.1559	5.39467	15.6829		11.0588	8.91399	13.5114	4.69718	12.7925	6.07741	16.8858	5.57336
5.79576	3.10695	7.00597	3.19257	6.27005	5.73961	8.14011	2.39851	6.49186	3.27182	5.61338		7.31937	5.40232	8.0525	3.15275	6.13704	4.46131	5.42542	5.68785		9.80923	10.2912	9.53798	6.83258	8.37737	11.589	8.15654	10.5756	7.89538	12.5005	10.7178	9.83847	7.18853	16.0086	8.87953	10.9436	9.18103	20.1398	5.35434	15.6526		11.0604	8.85817	13.7837	4.59569	12.7265	6.06388	16.9856	5.55475
5.79935	3.08146	6.98486	3.19177	6.26886	5.74479	8.14688	2.40329	6.47912	3.275	5.5644		7.35919	5.40033	8.0533	3.21527	6.14779	4.38286	5.41865	5.5867		9.78806	10.1884	9.46538	6.83056	8.31385	11.5234	8.05369	10.3578	7.8974	12.4713	10.7117	10.0906	7.20567	15.9773	8.86541	11.0122	9.21531	20.1398	5.29586	15.5851		11.0588	8.84971	13.9139	4.58385	12.6521	6.04358	17.0465	5.55982
5.79895	3.09739	6.96137	3.19058	6.26886	5.74718	8.13175	2.40249	6.48151	3.27341	5.54369		7.37393	5.39993	8.05131	3.2973	6.14222	4.3072	5.41984	5.51621		9.76991	10.3305	9.40387	6.8104	8.34006	11.4831	7.95689	10.1874	7.89942	12.4592	10.6905	10.6159	7.22281	15.9632	8.85029	11.0263	9.26472	20.1398	5.29485	15.5447		11.0621	8.83618	14.0425	4.63121	12.5997	6.02498	17.099	5.55137
5.79895	3.09142	6.9542	3.13283	6.26925	5.74081	8.09073	2.43355	6.49903	3.27779	5.57953		7.37831	5.39993	8.06445	3.34389	6.14222	4.24986	5.41626	5.5186		9.76991	10.509	9.37362	6.75998	8.40964	11.4498	7.85908	10.0361	7.91857	12.4551	10.6885	11.1443	7.22886	15.943	8.84222	10.8771	9.32926	20.1438	5.31199	15.5639		11.0638	8.74992	14.2556	4.64136	12.5828	6.02328	17.1226	5.52769
5.79616	3.02412	6.9542	3.14359	6.27045	5.67271	8.04374	2.51678	6.52571	3.28615	5.66913		7.38827	5.40112	8.09631	3.35863	6.14182	4.28331	5.40829	5.4963		9.77192	10.5131	9.34438	6.63293	8.43485	11.4397	7.76026	9.98569	7.91353	12.4541	10.7087	11.5738	7.245	15.936	8.84121	10.75	9.3948	20.1216	5.32106	15.6304		11.0638	8.65689	14.5076	4.64305	12.5963	6.01483	17.1226	5.5243
5.77745	2.97434	6.94624	3.15115	6.23222	5.62214	8.01746	2.53271	6.56394	3.28615	5.72568		7.41534	5.40192	8.10826	3.38093	6.13983	4.32791	5.40909	5.48714		9.77192	10.5524	9.32623	6.45243	8.42073	11.473	7.67556	10.0028	7.89942	12.4551	10.7117	12.0004	7.2571	15.9178	8.83012	10.7833	9.45933	19.9774	5.34627	15.7393		11.0672	8.64166	14.736	4.62614	12.625	5.98438	17.1412	5.5243
5.76789	2.98191	6.9311	3.16788	6.09244	5.61099	8.02104	2.53271	6.62965	3.29053	5.74161		7.44442	5.4075	8.08715	3.42394	6.13903	4.37928	5.40232	5.49033		9.73965	10.5776	9.33631	6.41412	8.41972	11.5194	7.60195	10.0018	7.90042	12.4551	10.7117	12.2928	7.24197	15.8765	8.78172	10.869	9.52689	19.8947	5.42896	15.8563		11.0706	8.64335	14.9305	4.60415	12.6403	5.97085	17.1429	5.5243
5.77545	2.99505	6.9311	3.20372	5.92797	5.6086	8.02304	2.53072	6.68381	3.3204	5.75355		7.4476	5.41865	8.06286	3.44624	6.13903	4.36733	5.38639	5.48873		9.60655	10.5746	9.33732	6.40202	8.39754	11.5204	7.56666	10.0684	7.93067	12.4592	10.7117	12.3765	7.23088	15.8704	8.74744	10.8498	9.55916	19.9008	5.52576	15.9138		11.0706	8.64843	15.1233	4.59738	12.6386	5.96577	17.1345	5.5243
5.7866	2.99306	6.93548	3.25469	5.77665	5.59148	8.02304	2.53351	6.7069	3.33792	5.78501		7.44242	5.4063	8.03896	3.46217	6.1462	4.28808	5.40033	5.48873		9.48051	10.5715	9.30909	6.39697	8.34309	11.475	7.61002	10.1722	7.94076	12.4541	10.7359	12.3583	7.22987	15.8734	8.71719	10.8448	9.54908	19.9331	5.62458	15.9178		11.0706	8.64335	15.3584	4.59569	12.6301	5.96239	17.148	5.52261
5.77904	2.99306	6.90681	3.30606	5.61537	5.4744	8.0079	2.54067	6.71805	3.3419	5.80014		7.45995	5.34537	7.99556	3.49482	6.17607	4.24149	5.43019	5.48833		9.44622	10.5715	9.28086	6.38185	8.29166	11.4004	7.59086	10.2186	7.92362	12.444	10.7914	12.3493	7.2218	15.8755	8.67685	10.8478	9.51681	19.9724	5.70827	15.9229		11.0706	8.61798	15.6342	4.59569	12.6386	5.97254	17.2021	5.53784
5.8093	2.99146	6.7969	3.33872	5.4744	5.4509	7.98401	2.53629	6.71965	3.35425	5.80652		7.47747	5.2498	7.95295	3.5211	6.23262	4.24508	5.44095	5.48873		9.43412	10.5756	9.27077	6.34353	8.26545	11.3742	7.55254	10.1622	7.92563	12.4198	10.7793	12.3644	7.20668	15.8734	8.6587	10.8287	9.50572	19.9875	5.77482	15.94		11.0638	8.56047	15.9014	4.59908	12.6521	5.99622	17.2224	5.55644
5.90846	2.98071	6.66071	3.35146	5.39435	5.42502	7.98321	2.52833	6.71168	3.37854	5.80333		7.48623	5.19484	7.96012	3.5446	6.26726	4.22317	5.42342	5.4951		9.40085	10.5736	9.26875	6.29311	8.25032	11.4609	7.52128	10.028	7.93471	12.3856	10.6613	12.3795	7.19357	15.8734	8.63551	10.8277	9.50572	19.9774	5.84238	15.9551		11.0604	8.46406	16.123	4.60077	12.6521	5.98776	17.192	5.56321
5.97855	2.97793	6.5954	3.33195	5.35573	5.40431	7.97525	2.51877	6.69097	3.39248	5.78422		7.48543	5.18807	7.98759	3.59199	6.27363	4.18017	5.43258	5.52537		9.36656	10.5786	9.27077	6.25782	8.21604	11.589	7.51523	9.93729	7.93975	12.3553	10.51	12.3775	7.17038	15.8734	8.56594	10.8327	9.50975	19.9774	5.93515	15.9592		11.0503	8.34397	16.2769	4.60077	12.6487	5.97931	17.1582	5.57166
6.00563	2.9831	6.57628	3.26425	5.34497	5.41904	7.91631	2.50404	6.67066	3.39686	5.77346		7.48464	5.18728	8.00551	3.6346	6.27363	4.16503	5.44453	5.53931		9.36051	10.5927	9.2738	6.26185	8.15049	11.6858	7.53843	9.96149	7.94378	12.3392	10.4243	12.3846	7.11694	15.8694	8.51451	10.8327	9.53395	19.9653	6.01078	15.9551		10.9759	8.1782	16.3784	4.60415	12.6504	6.00637	17.1396	5.57674
5.97337	2.98191	6.56633	3.25111	5.3402	5.4055	7.83348	2.4909	6.65832	3.39686	5.77466		7.52486	5.1829	8.02821	3.64256	6.27722	4.14711	5.43378	5.53732		9.35648	10.5988	9.2738	6.26085	8.06378	11.8027	7.54952	9.97359	8.01033	12.3341	10.3618	12.3835	7.09576	15.8563	8.48527	10.7863	9.56622	19.926	6.05817	15.943		10.805	7.99045	16.463	4.60415	12.6504	6.03343	17.104	5.57166
5.90408	2.97514	6.55518	3.25111	5.34059	5.4075	7.7403	2.49169	6.65951	3.39248	5.77545		7.60211	5.1829	8.04454	3.64256	6.3043	4.13198	5.43497	5.56878		9.34841	10.5726	9.27682	6.23765	7.95487	11.9258	7.51927	9.99174	8.0789	12.3291	10.3063	12.4057	7.09576	15.8331	8.42073	10.749	9.59344	19.7032	6.13581	15.9249		10.6241	7.88896	16.5205	4.61937	12.6504	6.04866	17.1345	5.56152
5.86466	2.96638	6.55199	3.25151	5.35055	5.39913	7.64831	2.49129	6.63044	3.39208	5.77705		7.66822	5.18051	8.05848	3.64893	6.35328	4.12521	5.40511	5.63608		9.34136	10.507	9.28791	6.22656	7.87219	11.9873	7.50011	10.0412	8.10209	12.3301	10.2973	12.4531	7.09173	15.7938	8.332	10.8256	9.60252	19.0054	6.22354	15.9108		10.4515	7.87036	16.5526	4.64475	12.6758	6.05711	17.5506	5.56321
5.87262	2.94368	6.55359	3.25151	5.35612	5.38519	7.61724	2.48492	6.5735	3.39208	5.77466		7.69331	5.18887	8.0756	3.67761	6.37677	4.10092	5.40073	5.71054		9.32926	10.4727	9.28791	6.22253	7.85202	11.8824	7.48599	10.0553	8.11218	12.3372	10.3114	12.5267	7.08265	15.7817	8.2725	10.8246	9.59949	18.1906	6.25782	15.9057		10.323	7.87881	16.5712	4.64475	12.7164	6.05204	18.1578	5.55813
5.91205	2.91859	6.56314	3.25111	5.35373	5.36727	7.63278	2.48492	6.51934	3.38212	5.77466		7.68693	5.21794	8.08715	3.73296	6.36722	4.02287	5.42183	5.75833		9.30707	10.4717	9.29296	6.20438	7.88429	11.7584	7.47389	10.0885	8.11319	12.3472	10.3124	12.678	7.08467	15.7938	8.22511	10.5726	9.60857	17.5735	6.25984	15.9218		10.279	7.90757	16.578	4.64813	12.7198	6.04696	18.5468	5.526
6.0116	2.917	6.58903	3.25469	5.35413	5.31112	7.66384	2.48532	6.42376	3.37734	5.77944		7.66583	5.22232	8.08795	3.79628	6.35527	3.97468	5.43617	5.72926		9.30304	10.5231	9.34438	6.20035	7.94479	11.714	7.46482	10.1833	8.0789	12.3483	10.267	12.7788	7.1492	15.8321	8.17369	10.4989	9.6489	17.1893	6.26992	15.9682		10.2739	7.93463	16.5729	4.65151	12.7215	6.05035	18.7735	5.49217
6.11673	2.9174	6.58226	3.25907	5.32347	5.27728	7.72357	2.48333	6.29355	3.37894	5.76988		7.65388	5.19325	8.0768	3.87791	6.34253	3.98623	5.43497	5.68147		9.29598	10.7944	9.41396	6.19127	7.95286	11.6454	7.4628	10.2963	8.02143	12.3452	10.2075	12.7849	7.24096	15.9279	8.12327	10.5847	9.69529	17.1621	6.27295	16.0237		10.235	7.91095	16.5746	4.64305	12.7451	6.05373	19.012	5.47863
6.14381	2.92456	6.56394	3.24474	5.31829	5.27847	7.80043	2.47895	6.20673	3.37973	5.75873		7.66862	5.15821	8.06206	4.00813	6.31425	3.99977	5.43816	5.68546		9.26371	11.2925	9.45127	6.13379	7.95286	11.5214	7.46179	10.3658	7.96092	12.3341	10.1813	12.7818	7.28835	16.0166	8.05974	10.6925	9.73663	17.0905	6.27496	16.055		10.1166	7.82638	16.5763	4.64136	12.7553	6.05035	19.3266	5.49047
6.14859		6.55598	3.21487	5.33542	5.26851	7.83189	2.50085	6.15257	3.37973	5.73603		7.71123	5.1379	8.0525	4.13039	6.27722	4.00734	5.41665	5.69223		9.24153	11.835	9.49866	5.96943	7.95487	11.476	7.47087	10.3981	7.89841	12.313	10.1853	12.7829	7.3055	16.1296	7.99622	10.8125	9.79108	16.5864	6.28	16.061		10.0743	7.63524	16.5763	4.63629	12.7519	6.0199	19.6311	5.48878
6.14501		6.56036	3.19894	5.34059		7.83229	2.52036	6.12709	3.38491	5.71692		7.79645	5.12316	8.05091	4.20764	6.26408	3.99977	5.39396	5.69342		9.2375	12.1456	9.49563	5.85045	7.97202	11.4831	7.4628	10.4082	7.82278	12.2918	10.1803	12.8121	7.26113	16.1618	7.93773	10.8609	9.87578	15.2836	6.28	16.059		10.0912	7.28173	16.5763	4.58047	12.7485	6.0199	19.8848	5.47863
6.09961		6.55478	3.19416	5.33343		7.84981	2.50205	6.12032	3.39009	5.7213		7.88883	5.10843	8.05011	4.25264	6.26328	3.95875	5.39595	5.6974		9.22741	12.2323	9.46538	5.86356	8.09302	11.5033	7.44868	10.4021	7.7411	12.2757	10.1238	12.8797	7.19962	16.18	7.85303	10.8609	9.98468	13.279	6.27597	16.059		10.0726	6.79628	16.5814	4.54495	12.7519	5.99284	20.0708	5.49047
6.03311		6.55279	3.19177	5.30834		7.92667	2.48891	6.13426	3.39327	5.75116		7.96171		8.04852	4.24826	6.26248	3.92092	5.46484	5.69223		9.20725	12.2696	9.46639	5.8928	8.22612	11.5355	7.44263	10.39	7.68363	12.2454	10.0311	13.0723	7.15626	16.2506	7.76934	10.9466	10.0825	11.5446	6.2669	16.06		10.0845	6.436	16.5864	4.52127	12.7671	5.93871	20.1182	5.50401
5.95665		6.55279	3.19496	5.27489		8.12418	2.50842	6.14302	3.40084	5.7655		8.00233		8.05091	4.24348	6.26567	3.91774	5.56718	5.67391		9.20523	12.322	9.46236	5.99263	8.26948	11.5547	7.45473	10.3789	7.64531	12.1829	9.93628	13.3939	7.1129	16.2869	7.69472	11.0989	10.1299	10.3648	6.25379	16.061		10.0845	6.34804	16.5898	4.48913	12.7824	5.87613	20.1351	5.48709
5.89413		6.55558	3.19098	5.26652		8.40892	2.54187	6.12749	3.41199	5.77028		7.98998		8.05728	4.24587	6.27443	3.91654	5.64364	5.66395		9.21229	12.323	9.45933	6.08338	8.26746	11.5597	7.43457	10.3517	7.61708	12.1446	9.83141	13.529	7.08164	16.297	7.56767	11.1836	10.1743	9.83545	6.24068	16.062		10.0794	6.35988	16.5966	4.48067	12.7621	5.8423	20.1876	5.44142
5.84475		6.53407	3.18898	5.26812		8.63272	2.54187	6.06058	3.4104	5.76152		7.97684		8.05808	4.24707	6.28558	3.9265	5.78621	5.66116		9.21733	12.2867	9.44522	6.14993	8.26948	11.5436	7.35188	10.3376	7.58582	12.1426	9.77495	13.5411	7.06248	16.299	7.46784	11.1715	10.2166	9.7568	6.23564	16.062		10.0777	6.38187	16.5983	4.48406	12.7282	5.84399	19.9812	5.37376
5.83001		6.51974	3.18819	5.26812		8.75258	2.53948	5.96859	3.39487	5.77984		7.97286		8.05808	4.25185	6.29554	3.92251	5.96342	5.64006		9.2264	12.2726	9.43211	6.19127	8.25032	11.6384	7.25407	10.3336	7.55153	12.1405	9.75276	13.5452	7.06753	16.2959	7.49708	11.1766	10.2418	9.73562	6.25177	16.061		10.0591	6.39541	16.5069	4.46376	12.7079	5.83384	19.6835	5.30103
5.85191		6.54084	3.1866	5.2713		8.81829	2.55063	5.89094	3.39367	5.80333		7.97166		8.06007	4.25185	6.31067	3.91654	6.05979	5.63807		9.21632	12.2646	9.40488	6.22253	8.17671	11.9913	7.16433	10.3063	7.48196	12.1415	9.75175	13.5472	7.07761	16.297	7.51624	11.2885	10.2539	9.67109	6.33748	16.061		9.97622	6.40555	16.3615	4.42655	12.7012	5.81862	19.7884	5.22661
5.87183		6.55836	3.2073	5.26613		8.85413	2.54107	5.80333	3.46097	5.80333		7.99277		8.07441	4.2618	6.32341	3.91893	6.08368	5.63847		9.20523	12.2525	9.36253	6.27698	8.13134	12.317	7.11794	10.3033	7.36297	12.1395	9.74369	13.5492	7.08971	16.298	7.49305	11.4589	10.2479	9.63882	6.46252	16.06		9.88658	6.41063	16.353	4.40118	12.6893	5.80339	19.9372	5.16402
5.88736		6.53328	3.23279	5.25577		8.87285	2.52873	5.6747	3.59079	5.80094		8.03299		8.09432	4.34702	6.32341	3.92092	6.05182	5.61696		9.2133	12.2373	9.32321	6.30118	8.12327	12.4461	7.13004	10.2922	7.24399	12.1385	9.7326	13.5704	7.14315	16.2899	7.46582	11.6192	10.2438	9.68722	6.55024	16.0771		9.80877	6.41063	16.4088	4.41302	12.6792	5.81016	19.834	5.13696
5.87621		6.5277	3.23797	5.25458		8.88121	2.52435	5.50745	3.74172	5.80452		8.11742		8.10587	4.5099	6.34611	3.92251	6.01001	5.59705		9.24052	12.2222	9.29396	6.2669	8.13234	12.4854	7.1492	10.2549	7.14114	12.1345	9.7336	13.6127	7.17239	16.2717	7.43961	11.7069	10.2368	9.76991	6.57948	16.1114		9.74788	6.40217	16.4511	4.435	12.6741	5.85414	19.7495	5.14034
5.79377		6.56633	3.17943	5.25816		8.8836	2.52793	5.36927	3.93486	5.79178		8.22215		8.10865	4.65485	6.37956	3.92251	6.08726	5.59745		9.25766	12.2091	9.27884	6.23261	8.16159	12.5056	7.18046	10.2317	7.02215	12.1204	9.74369	13.64	7.16534	16.2566	7.39625	11.7211	10.2348	9.73562	6.57545	16.1356		9.69713	6.39541	16.5374	4.45192	12.6758	5.91503	19.714	5.17756
5.77944		6.5735	3.08226	5.26692		8.88241	2.54864	5.32506	4.17061	5.74758		8.2556		8.10985	4.78467	6.39589	3.93327	6.22744	5.55364		9.25968	12.191	9.26674	6.25076	8.16058	12.5177	7.21575	10.2378	6.93241	12.1063	9.75982	13.648	7.1371	16.2546	7.27121	11.6989	10.2791	9.62974	6.57646	16.1689		9.60072	6.40894	16.4866	4.46376	12.691	5.94379	19.6835	5.22999
5.85669		6.56872	3.06155	5.27409		8.88161	2.56536	5.34258	4.37769	5.67192		8.24166		8.10388	4.87387	6.40863	3.98225	6.49863	5.51502		9.24758	12.1557	9.24859	6.24673	8.13537	12.5156	7.22685	10.2479	6.86686	12.0437	9.7326	13.648	7.13912	16.2576	7.06853	11.6676	10.3426	9.51681	6.60469	16.2173		9.50261	6.40725	16.2549	4.48237	12.7198	5.95732	19.6328	5.27059
5.93793		6.53646	3.08744	5.26294		8.87683	2.57333	5.36648	4.58277	5.58192		8.14609		8.06883	4.88463	6.42496	4.02884	6.82478	5.51382		9.21733	12.1073	9.23245	6.27496	8.11823	12.4904	7.23895	10.2781	6.75796	11.9247	9.66302	13.6531	7.18147	16.2586	6.90115	11.8017	10.3941	9.41597	6.62889	16.2334		9.49247	6.42416	16.1416	4.48575	12.7418	5.981	19.4991	5.21477
6.00005		6.5066		5.25298		8.87524	2.5805	5.39475	4.79702	5.48276		8.0318		7.95574	4.87626	6.43292	4.02605	6.99323	5.51024		9.17498	12.1012	9.2143	6.28	8.09705	12.4753	7.2581	10.3517	6.53613	11.8814	9.60958	13.6652	7.14517	16.2556	6.83561	12.0659	10.4374	9.33531	6.67024	16.2143		9.49247	6.43093	16.0418	4.46545	12.7502	6.01144	19.3435	5.04224
6.04227		6.48868		5.35732		8.87564	2.56337	5.41307	4.97462	5.39316		8.00671		7.74627	4.87825	6.43571	4.02167	7.05495	5.50944		9.1296	12.1143	9.19111	6.30219	8.03756	12.4844	7.23491	10.4132	6.33345	11.9016	9.55613	13.6672	7.06853	16.2627	6.82653	12.2202	10.4788	9.28489	6.72065	16.187		9.45525	6.41401	15.9099	4.45192	12.7502	6.04527	19.2945	4.89677
6.05023		6.46956		5.46404		8.87683	2.50921	5.40391	5.03635	5.35015		7.99397		7.53641	4.8902	6.43332	4.01769	7.08163	5.50625		9.09128	12.1032	9.17599	6.32437	8.02445	12.5005	7.20164	10.4445	6.20539	11.9147	9.49463	13.6692	7.10887	16.301	6.80233	12.4289	10.51	9.27077	6.73175	16.1689		9.38083	6.41739	15.8456	4.43162	12.7553	6.07403	19.2877	4.83588
6.03788		6.46956		5.48634		8.88599	2.46183	5.38241	5.0029	5.34139		8.02622		7.40778	4.89378	6.44407	4.05234	7.07845	5.50625		9.06406	12.0861	9.16691	6.25782	8.02344	12.5015	7.21676	10.4455	6.09447	11.9278	9.46236	13.6833	7.15122	16.3373	6.77006	12.9361	10.507	9.27682	6.73074	16.1598		9.33516	6.44277	15.8405	4.41809	12.7739	6.0994	19.2826	4.79867
5.9889		6.48151		5.47081		8.88718	2.45267	5.36568	4.94794	5.32307		8.11303		7.36676	4.89299	6.4839	4.20804	7.07646	5.51223		9.05498	12.0851	9.1175	6.20337	7.96697	12.5136	7.26415	10.4475	6.01783	11.9116	9.44622	13.6924	7.17038	16.3383	6.72267	13.4494	10.4667	9.27783	6.73376	16.1628		9.31486	6.43262	15.8405	4.41471	12.8077	6.12985	19.2792	4.78006
5.95505		6.48788		5.42263		8.89077	2.45585	5.3609	4.89936	5.31073		8.19228		7.43127	4.89378	6.53129	4.31238	7.07526	5.5194		9.03986	12.0881	9.05398	6.17917	7.9095	12.5459	7.29239	10.4334	5.9533	11.7674	9.4432	13.6934	7.18752	16.3322	6.67024	13.6974	10.4465	9.27481	6.77208	16.1649		9.30979	6.43262	15.7475	4.435	12.8602	6.14338	19.2759	4.78175
5.95426		6.4835		5.35971		8.92661	2.4686	5.36966	4.89259	5.31949		8.26317		7.52048	4.90016	6.60257	4.36733	7.07646	5.51342		8.96322	12.081	9.01163	6.21547	7.87522	12.563	7.28936	10.4183	5.90893	11.5164	9.48454	13.6984	7.19962	16.3252	6.62184	13.765	10.4253	9.23044	6.83258	16.1518		9.30302	6.40894	15.6528	4.47222	12.8957	6.11801	19.1828	4.82573
5.90329		6.47991		5.33422		8.97121	2.48452	5.38679	4.90454	5.32267		8.32131		7.54915	4.93241	6.70491	4.39959	7.07805	5.44413		8.87953	12.0861	8.9602	6.27597	7.82681	12.5691	7.24903	10.4132	5.87465	11.3399	9.5763	13.7035	7.20567	16.304	6.51898	13.7126	10.3951	9.1891	6.85275	16.1366		9.2878	6.40217	15.8168	4.48744	12.9126	6.07064	18.9968	4.90185
5.84156		6.47235		5.3394		8.97559	2.48652	5.4063	4.92086	5.32188		8.33803		7.52844	4.94874	6.79332	4.40038	7.07805	5.39117		8.82609	12.0931	8.9118	6.28404	7.7522	12.5731	7.19458	10.4132	5.85549	11.0999	9.69831	13.6984	7.20164	16.2909	6.29311	13.6742	10.391	9.10742	6.84468	16.1346		9.29287	6.40725	15.9961	4.49421	12.9363	6.03682	18.8428	4.9509
5.81806		6.45881		5.35174		8.96643	2.50085	5.43657	4.92724	5.31989		8.33604		7.43486	4.95073	6.83672	4.38605	7.07566	5.39356		8.78475	12.0831	8.89163	6.28303	7.70279	12.5802	7.125	10.4183	5.83028	10.5705	9.78806	13.6843	7.16332	16.2728	5.93112	13.7186	10.4233	9.03482	6.85577	16.1245		9.2878	6.36834	16.0892	4.50097	12.9616	6.03682	18.7194	4.97289
5.81568		6.43651		5.37046		8.96285	2.52196	5.48117	4.9133	5.31431		8.33923		7.25964	4.95312	6.84708	4.40954	7.05177	5.38002		8.7434	12.08	8.87449	6.29715	7.67354	12.5953	7.03526	10.4152	5.78894	10.0946	9.82637	13.6611	7.11391	16.2546	5.5308	13.8295	10.501	8.99146	6.86384	16.0055		9.25397	6.30576	16.1619	4.50774	12.9667	6.06557	18.5756	4.98811
5.81806		6.4377		5.38042		8.96404	2.52554	5.50904	4.90494	5.31351		8.31573		7.06331	4.95392	6.83911	4.42269	7.01194	5.38002		8.67887	12.1002	8.83416	6.34756	7.63825	12.5953	6.93644	10.4142	5.72642	10.021	9.83444	13.6521	7.13509	16.2324	5.27468	13.9737	10.5907	9.0449	6.85577	15.7434		9.26919	6.29223	16.2465	4.52973	12.9667	6.10786	18.4149	4.99657
5.82085		6.4393		5.38002		8.9732	2.53072	5.51422	4.88662	5.31351		8.20662		6.78177	4.95113	6.83792	4.41592	6.98486	5.38081		8.57804	12.1284	8.79181	6.43529	7.60195	12.5933	6.84972	10.386	5.60945	10.0008	9.83343	13.6521	7.16534	16.2092	5.18998	14.0786	10.6058	9.298	6.83964	15.5467		9.32501	6.30237	16.3226	4.58216	12.9397	6.14845	18.3168	4.9712
5.82563		6.4373		5.38042		8.97917	2.53112	5.49909	4.83604	5.30953		7.99954		6.35885	4.94237	6.84827	4.41512	6.98208	5.3844		8.48224	12.1315	8.72223	6.71057	7.5596	12.5751	6.76603	10.3598	5.47534	9.88889	9.83646	13.645	7.16634	16.2042	5.14057	14.1068	10.5877	9.77192	6.83359	15.4419		9.34193	6.30407	16.353	4.60922	12.8838	6.19412	18.2914	4.92384
5.82882		6.43651		5.37962		8.97798	2.54545	5.4951	4.81374	5.28843		7.82591		5.95505	4.93122	6.86301	4.40636	6.99323	5.3844		8.42174	12.1093	8.61131	7.22987	7.50818	12.5419	6.66923	10.3638	5.38862	9.77192	9.86166	13.6531	7.16231	16.2072	5.05889	14.0856	10.5695	10.1208	6.83359	15.3874		9.34023	6.30237	16.3632	4.59908	12.8365	6.25163	18.2897	4.87817
5.82802		6.39868		5.38241		8.95767	2.5797	5.4951	4.80817	5.28843		7.74826		5.79537	4.93878	6.91398	4.39242	7.00557	5.41068		8.3441	12.1012	8.52459	7.75421	7.45977	12.5167	6.57545	10.4304	5.30291	9.69125	9.91511	13.6692	7.16332	16.1881	4.94495	14.0544	10.6048	10.1793	6.82956	15.3995		9.31655	6.36327	16.5171	4.56694	12.801	6.27362	18.2847	4.82573
5.8324		6.26368		5.38639		8.95409	2.59443	5.51024	4.79821	5.29918		7.71043		5.80452	4.979	6.99203	4.38764	7.01035	5.429		8.23015	12.0538	8.48022	8.18881	7.40734	12.5076	6.51898	10.4889	5.23737	9.60857	10.0028	13.6752	7.16332	16.1588	4.7947	14.1663	10.6966	10.1511	6.84065	15.4187		9.27934	6.4563	16.5797	4.52634	12.7587	6.24487	18.2187	4.79867
5.83758		6.0339		5.39356		8.95528	2.58647	5.51302	4.80219	5.37524		7.69729		5.83837	5.07856	7.02747	4.41631	6.99522	5.44254		8.10411	11.9782	8.4288	8.39653	7.35188	12.5025	6.51697	10.5191	5.2283	9.47547	10.1057	13.6611	7.17945	16.1538	4.67269	14.2671	10.7389	10.1934	6.84972	15.4167		9.23198	6.46814	16.5746	4.56525	12.7045	6.22118	18.08	4.78175
5.83758		5.80492		5.38958		8.94851	2.58289	5.51103	4.83007	5.5632		7.6949		5.85231	5.21675	7.03703	4.45176	6.95062	5.4513		7.99017	11.9197	8.34813	8.39351	7.32566	12.4985	6.53713	10.5726	5.23132	9.3101	10.146	13.6531	7.18954	16.1477	4.67975	14.2631	10.7409	10.2902	6.81846	15.3834		9.16432	6.436	16.5695	4.6346	12.6437	6.20427	17.9853	4.77837
5.83638		5.63847		5.36648		8.91705	2.58966	5.51581	4.84162	5.72289		7.68375		5.85868	5.2948	7.04738	4.45335	6.90721	5.42542		7.89639	11.8673	8.25839	8.5256	7.31155	12.4884	6.59159	10.6734	5.2404	9.13364	10.1107	13.649	7.13509	16.1276	4.7221	14.2409	10.7379	10.3144	6.78317	15.3078		9.10512	6.41063	16.6338	4.64644	12.5946	6.18397	17.921	4.79867
5.83718		5.50466		5.38878		8.85851	2.59244	5.52696	4.83724	5.75833		7.66185		5.87382	5.32347	7.05495	4.45653	6.89048	5.37803		7.79253	11.8118	8.17974	8.71114	7.26516	12.4703	6.68939	10.7631	5.28375	8.91079	10.0038	13.6339	7.11895	16.1094	4.70597	14.2187	10.7167	10.2791	6.70452	15.095		9.01378	6.41909	16.8926	4.63967	12.5658	6.18566	17.8144	4.81727
5.83559		5.40869		5.43298		8.78245	2.58926	5.53891	4.83843	5.73404		7.63994		5.86705	5.35493	7.05575	4.47206	6.89208	5.34935		7.61909	11.829	8.12629	8.74945	7.2208	12.4693	6.78418	10.7904	5.3009	8.695	9.92317	13.6117	7.10282	16.0852	4.66967	14.2077	10.6966	10.261	6.60167	14.7754		8.90722	6.41232	17.2055	4.64475	12.5455	6.18736	17.6859	4.85618
5.8336		5.38081		5.43298		8.71794	2.56855	5.53453	4.83724	5.6982		7.60769		5.83439	5.37325	7.05137	4.47206	6.89287	5.34935		7.41843	11.8985	8.1031	8.7787	7.21777	12.4703	6.83661	10.7662	5.23737	8.58509	9.93628	13.5996	6.98081	16.0731	4.66664	14.2984	10.6976	10.2912	6.53209	14.6372		8.90046	6.40894	17.3222	4.64813	12.5439	6.17552	17.5641	4.92384
5.8316		5.37245		5.45449		8.64904	2.57134	5.50785	4.83525	5.6982		7.56747		5.82205	5.37604	7.04898	4.49158	6.89526	5.35373		7.25105	11.9106	8.091	9.2012	7.21676	12.4632	6.8346	10.7208	5.2041	8.58812	10.1006	13.5986	6.83056	16.0701	4.69286	14.4295	10.7087	10.4304	6.4726	14.6009		8.89876	6.46137	17.1006	4.64813	12.5472	6.13661	17.4051	4.96105
5.77944		5.36528		5.50148		8.5929	2.56935	5.474	4.83883	5.69541		7.55592		5.79537	5.38121	7.05615	4.53976	6.89486	5.33263		7.09677	11.8763	8.07689	10.148	7.2218	12.439	6.75494	10.6855	5.25955	8.59215	10.2821	13.6006	6.74788	16.0701	4.70496	14.4678	10.7258	10.5685	6.40403	14.5828		8.80066	6.46645	16.9146	4.64644	12.5422	6.11462	17.2275	4.96612
5.6528		5.37962		5.51502		8.57498	2.58289	5.43935	4.83843	5.66515		7.55592		5.72249	5.38997	7.07685	4.57799	6.90402	5.20599		6.92938	11.8542	8.04159	11.0172	7.23592	12.4239	6.67931	10.6784	5.27972	8.63854	10.4042	13.6016	6.73175	16.0701	4.70194	14.486	10.7651	10.5968	6.40504	14.5727		8.68902	6.42078	16.9552	4.64644	12.5422	6.11631	17.1328	4.96105
5.54409		5.43497		5.51661		8.57059	2.56855	5.37404	4.84799	5.7866		7.56627		5.65439	5.39196	7.08681	4.58755	6.91079	4.99812		6.76704	11.8219	7.97	11.5144	7.23189	12.4209	6.64805	10.6956	5.24846	8.79181	10.4828	13.5885	6.75695	16.0711	4.74126	14.5344	10.7924	10.509	6.27496	14.0514		8.68902	6.41401	17.0161	4.64475	12.5912	6.07403	17.0533	4.96105
5.49391		5.5636		5.50506		8.56821	2.56218	5.29281	4.87547	5.9901		7.58379		5.61019	5.39396	7.08721	4.5752	6.92752	4.87945		6.63696	11.7685	7.91051	11.7886	7.19559	12.4239	6.62889	10.6865	5.25754	8.85936	10.4879	13.5553	6.80435	16.061	4.80176	14.5374	10.8105	10.3941	6.19934	12.9644		8.69748	6.39371	17.0364	4.64475	12.7502	5.99453	16.9467	4.96105
5.48356		5.68705		5.46763		8.56741	2.5582	5.26055	4.8906	6.1243		7.63039		5.61298	5.39356	7.08681	4.55808	6.96017	4.86073		6.53108	11.71	7.86009	11.9409	7.18046	12.4229	6.6178	10.6794	5.32711	8.86441	10.4344	13.5179	6.8346	16.065	4.80882	14.5414	10.8458	10.3285	6.20942	11.9419		8.71439	6.34466	17.0601	4.64305	12.9024	5.94717	16.9061	4.95597
5.50665		5.72369		5.46205		8.54312	2.55581	5.24502	4.88224	6.24377		7.71879		5.71054	5.40949	7.09318	4.54494	6.98685	4.8683		6.40504	11.6696	7.79152	11.9963	7.1855	12.3946	6.62083	10.7057	5.38459	8.84525	10.3457	13.4716	6.83258	16.0862	4.80479	14.5676	10.8559	10.264	6.19429	11.2542		8.70255	6.34466	17.2207	4.64305	12.96	5.9404	16.9061	4.92214
5.56917		5.73922		5.46683		8.51524	2.602	5.23546	4.88025	6.34731		7.7614		5.82205	5.43139	7.10473	4.53299	6.98805	4.87308		6.3153	11.6817	7.68766	11.9913	7.1855	12.3785	6.63898	10.8357	5.35837	8.83214	10.2579	13.4322	6.81846	16.0872	4.80882	14.5697	10.8166	10.2297	6.17413	10.9235		8.62306	6.33282	17.647	4.65828	12.9887	5.94209	16.9027	4.86125
5.70298		5.75196		5.46564		8.51763	2.69598	5.23626	4.89418	6.38673		7.72835		5.92718	5.4505	7.10274	4.51706	6.98526	4.86949		6.29715	11.6989	7.57775	11.9883	7.16231	12.3775	6.68032	10.9749	5.3614	8.84827	10.1329	13.4312	6.81544	16.0731	4.79773	14.5455	10.7873	10.51	6.12875	10.8105		8.5757	6.32098	18.0631	4.65489	13.0208	5.9404	16.8926	4.73947
5.82961		5.74121		5.44851		8.53117	2.78598	5.22989	4.90573	6.39629		7.69092		6.02036	5.46922	7.10752	4.49675	6.97053	4.86352		6.2437	11.6989	7.51624	11.9893	7.14719	12.3745	6.74284	11.0979	5.37955	8.85432	9.85259	13.4201	6.82754	16.0509	4.78563	14.5192	10.8035	11.0092	6.05615	10.7601		8.50804	6.31252	18.2864	4.68027	13.0513	5.93871	16.8892	4.57709
5.85789		5.73245		5.39515		8.53077	2.93213	5.19644	4.91131	6.40505		7.65985		6.06696	5.47758	7.10553	4.46968	6.96814	4.75042		6.1469	11.6938	7.47288	11.9913	7.13912	12.3775	6.80636	11.1665	5.4098	8.81802	9.51479	13.408	6.83157	16.0318	4.75336	14.5152	10.8317	11.4831	6.02388	10.7399		8.03274	6.29053	18.3777	4.69718	13.0564	5.9201	16.8909	4.51958
5.81488		5.74041		5.25896		8.52878	3.17505	5.19006	4.9133	6.40346		7.6264		6.08806	5.49152	7.10513	4.42229	6.95022	4.56485		6.09548	11.6696	7.40129	11.9903	7.14214	12.3795	6.85376	11.1856	5.44106	8.815	9.40892	13.408	6.82149	16.0136	4.73118	14.5354	10.8297	11.8814	6.02086	10.7208		7.66738	6.27531	18.3895	4.69718	13.0547	5.87782	16.8909	4.51619
5.79258		5.76988		5.13033		8.52838	3.36221	5.19006	4.91131	6.38633		7.59335		6.09483	5.51581	7.10752	4.36773	6.92911	4.47605		6.07228	11.6253	7.33776	11.9711	7.14214	12.3795	6.86384	11.1766	5.44408	8.82609	9.42707	13.41	6.8225	16.0086	4.73219	14.5576	10.8347	12.0841	6.02086	10.6341		7.58788	6.26855	18.4065	4.69718	13.0648	5.87613	16.8808	4.51619
5.80054		5.79457		5.08453		8.52121	3.43031	5.19962	4.91091	6.36204		7.56707		6.09483	5.54249	7.10513	4.34742	6.92991	4.47923		6.01582	11.5587	7.28634	11.9651	7.14013	12.3846	6.85678	11.1776	5.44711	8.71416	9.42606	13.4131	6.81947	16.0146	4.74731	14.5565	10.8498	12.1869	6.01178	10.3578		7.5456	6.29053	18.4927	4.69549	13.146	5.8626	16.8706	4.50605
5.81488		5.78422		5.06303		8.5244	3.44026	5.204	4.9137	6.32262		7.55353		6.09403	5.56678	7.10353	4.34782	6.93349	4.46291		5.94523	11.5103	7.2208	11.9661	7.15828	12.3946	6.84771	11.1776	5.50358	8.67786	9.39682	13.4181	6.81947	16.0156	4.75135	14.5475	10.8579	12.317	6.00473	9.9504		7.42381	6.36158	18.6196	4.69549	13.1985	5.83892	16.8638	4.49928
5.84355		5.75992		5.05029		8.52719	3.44385	5.2052	4.94794	6.29116		7.55154		6.09523	5.59307	7.10433	4.34463	6.94146	4.4199		5.92607	11.4932	7.15324	11.9762	7.16029	12.4178	6.84569	11.1695	5.56508	8.80592	9.44824	13.4181	6.81443	16.0126	4.75135	14.5142	10.865	12.317	6.00775	9.62168		7.24621	6.41739	18.8073	4.69211	13.19	5.82369	16.8588	4.4959
5.86506		5.744		5.05387		8.5248	3.46336	5.20679	5.00489	6.26686		7.55233		6.10917	5.6086	7.10353	4.34423	6.96376	4.4645		5.91902	11.4841	7.08064	11.9782	7.16029	12.4178	6.84771	11.1634	5.5792	9.06809	9.60857	13.4161	6.81746	16.0146	4.76042	14.4607	10.865	12.555	6.00674	9.35346		7.06353	6.41739	19.0627	4.68534	13.1951	5.77802	16.8486	4.4756
5.87581		5.75037		5.08573		8.51883	3.47172	5.20798	5.04192	6.22664		7.55194		6.1474	5.61616	7.10314	4.34185	6.97969	4.54574		5.87465	11.474	6.95459	11.9691	7.15929	12.3856	6.85577	11.1524	5.555	9.16994	9.7084	13.4111	6.8104	16.0055	4.7826	14.4285	10.8781	13.164	6.00876	9.13666		6.77091	6.37172	19.1947	4.68534	13.2661	5.71206	16.8266	4.46545
5.88815		5.75833		5.13591		8.50967	3.47889	5.21436	5.06622	6.18642		7.52725		6.19359	5.63767	7.10314	4.33985	6.98168	4.62259		5.79902	11.4579	6.78922	12.0004	7.17239	12.3372	6.85981	11.1483	5.52979	9.15985	9.71041	13.4	6.78116	15.9924	4.89151	14.616	10.8872	13.6067	6.02893	9.07213		6.30237	6.26009	19.1964	4.68534	13.3405	5.68499	16.7979	4.46714
5.89452		5.75435		5.18568		8.49414	3.46894	5.21635	5.09648	6.15417		7.42092		6.22943	5.65519	7.10314	4.34901	6.95062	4.73569		5.73953	11.4054	6.67225	12.1002	7.17643	12.2807	6.8467	11.1483	5.52576	9.16187	9.70335	13.3828	6.76502	15.9914	4.99738	15.0869	10.8882	13.8315	6.07833	9.07414		6.03005	6.17044	19.1693	4.69211	13.3811	5.67992	16.786	4.46545
5.88218		5.74678		5.26334		8.46865	3.44425	5.22073	5.13153	6.14222		7.23933		6.22903	5.65838	7.09955	4.36892	6.87814	4.8894		5.66088	11.3238	6.62587	12.2	7.16029	12.2273	6.7862	11.1423	5.52677	9.14977	9.70234	13.3818	6.80838	15.9924	5.00747	15.459	10.8972	13.885	6.08539	9.03179		6.01821	6.23979	19.1896	4.72255	13.3879	5.69176	16.781	4.42655
5.84275		5.72448		5.4075		8.44276	3.42872	5.24821	5.14228	6.16213		6.98606		6.22903	5.65838	7.09876	4.3753	6.85186	4.98697		5.59433	11.3238	6.63494	12.2273	7.16534	12.1879	6.74385	11.1584	5.53584	9.16893	9.6973	13.4181	6.85073	15.9955	5.00646	15.6728	10.9194	13.8809	6.07632	9.01868		6.01483	6.33451	19.2539	4.72255	13.3997	5.74081	16.7742	4.34874
5.80572		5.67908		5.52139		8.4125	3.44863	5.27728	5.13192	6.13386		6.72164		6.24536	5.65877	7.09876	4.37808	6.84389	5.00131		5.53685	11.2965	6.61982	12.2363	7.19357	12.194	6.77107	11.1776	5.54794	9.21834	9.68924	13.4716	6.87594	15.9934	5.00041	15.9188	10.9204	13.8799	6.07027	9.06507		6.01483	6.34804	19.3503	4.72763	13.4843	5.77295	16.7657	4.33352
5.79417		5.57754		5.55962		8.35436	3.4992	5.31112	5.1156	6.07333		6.60814		6.26726	5.65877	7.10353	4.38963	6.84867	5.00091		5.4703	11.2784	6.57545	12.313	7.21475	12.2353	6.79124	11.2078	5.55702	9.27581	9.68722	13.5139	6.883	15.9813	5.01453	16.1144	10.9083	13.89	6.06321	9.07414		6.0402	6.30914	19.4585	4.75638	13.5232	5.76787	16.7539	4.34367
5.79178		5.47559		5.5851		8.31095	3.53385	5.33661	5.10484	6.05103		6.62885		6.29036	5.66515	7.10752	4.3972	6.85385	5.00051		5.39568	11.2734	6.54419	12.3967	7.02013	12.2797	6.80132	11.2481	5.56004	9.28489	9.6852	13.5391	6.86989	15.9864	5.03772	16.1195	10.8962	13.8941	6.06119	9.06305		6.04358	6.28715	19.5262	4.76146	13.5401	5.75603	16.7421	4.34028
5.79178		5.43497		5.60541		8.29901	3.53225	5.31909	5.09887	6.04864		6.67266		6.3035	5.68546	7.10831	4.39401	6.84867	5.00091		5.33619	11.2572	6.50487	12.4753	6.81443	12.3251	6.82451	11.2602	5.50358	9.21834	9.68319	13.5573	6.83762	15.94	5.04478	16.1891	10.8962	13.8799	6.0622	9.04793		6.00299	6.2973	19.5651	4.76484	13.6433	5.74927	16.7285	4.33521
5.79138		5.45289		5.61577		8.29781	3.54779	5.2717	5.09569	6.04625		6.70093		6.30669	5.69382	7.10194	4.39361	6.84708	4.99493		5.3251	11.2713	6.43227	12.554	6.79225	12.3664	6.87997	11.2532	5.33316	9.13868	9.71545	13.5623	6.86485	15.8886	5.03368	16.4422	10.8993	13.8567	6.07228	9.05095		6.00637	6.31422	19.5685	4.76991	13.7566	5.75096	16.7184	4.32168
5.79138		5.53055		5.61616		8.29224	3.56411	5.23626	5.09449	6.04505		6.73478		6.31107	5.70139	7.09716	4.38764	6.83911			5.27972	11.3127	6.30622	12.6175	6.8467	12.3523	6.95661	11.2663	5.15872	9.16288	9.76083	13.5623	6.86989	15.9037	5.06393	16.8687	10.8932	13.8396	6.09346	9.13767		5.9607	6.31422	19.5939	4.77499	13.8412	5.7425	16.7032	4.28277
5.79298		5.62094		5.61577		8.21179	3.59278	5.21794	5.08095	6.04704		6.80726		6.26925	5.73683	7.09716	4.40198	6.82677			5.20914	11.3671	6.18119	12.677	6.88098	12.3402	7.02215	11.2441	5.06192	9.18002	9.81528	13.5633	6.84569	15.9501	5.13956	17.3305	10.8882	13.8477	6.11363	9.39782		5.83553	6.32098	19.7021	4.78852	13.9004	5.7425	16.6964	4.24725
5.78621		5.67032		5.62612		8.07242	3.66088	5.20241	5.08095	6.02793		6.88212		6.15337	5.77426	7.10035	4.43224	6.83752			5.14359	11.3762	6.02792	12.7032	6.8951	12.3281	7.0161	11.1524	5.04377	9.08725	9.8778	13.5583	6.82855	15.9682	5.25955	17.6804	10.8811	13.888	6.12371	9.65193		5.56321	6.32267	19.7545	4.81389	13.9072	5.70698	16.7032	4.21681
5.76271		5.65121		5.62493		7.98481	3.77995	5.17374	5.08892	6.01359		6.94464		6.08089	5.78939	7.10314	4.45733	6.8642			5.03772	11.4488	5.89179	12.7032	6.92434	12.3009	6.94854	11.0919	5.04982	9.01062	9.9504	13.5421	6.83258	15.9682	5.3977	17.9083	10.8599	13.9344	6.13783	9.78503		5.22661	6.26516	19.7664	4.82742	13.9139	5.60549	16.7133	4.19482
5.72926		5.59785		5.7209		7.95494	3.92451	5.1383	5.0933	6.02634		6.98407		6.06536	5.79895	7.11469	4.46091	6.90681			4.95503	11.717	5.82625	12.7143	6.94047	12.2767	6.89712	11.0656	5.05486	9.01465	10.028	13.519	6.84065	15.9541	5.49954	18.0323	10.8327	13.9838	6.13984	9.86469		5.00164	6.16368	19.7681	4.84434	13.9258	5.47018	16.7235	4.18298
5.7197		5.61139		5.99886		7.94299	4.02207	5.1156	5.09768	6.04027		7.00159		6.07253	5.80612	7.1553	4.45653	6.94026			4.88848	11.9096	5.80911	12.7627	6.93745	12.2625	6.88199	11.0475	5.0599	9.08826	10.1279	13.529	6.83359	15.9319	5.55601	18.0696	10.8085	14.0383	6.15396	9.88082		4.8714	6.11801	19.7681	4.81051	14.029	5.39914	16.7336	4.18467
5.72607		5.66236		6.35806		7.93065	4.05711	5.09369	5.10325	6.03828		6.998		6.12589	5.8101	7.24411	4.44578	6.94783			4.78664	12.0458	5.80406	12.7829	6.92737	12.2605	6.86384	11.0485	5.06998	9.28791	10.2852	13.5936	6.82451	15.9239	5.56912	18.0696	10.8216	14.0887	6.15799	9.91208		4.78175	6.11124	19.763	4.76991	14.8375	5.3856	16.7454	4.18805
5.78023		5.70616		6.7977		7.93144	4.06707	5.07976	5.10166	6.0335		6.99124		6.17567	5.8101	7.2911	4.43861	6.94902			4.71908	12.2434	5.80406	12.7839	6.93039	12.2646	6.80536	11.0364	5.0841	9.64588	10.4596	13.6228	6.82351	15.9299	5.56508	18.0807	10.8902	14.1078	6.12976	10.0916		4.7141	6.17213	19.7613	4.76653	15.7069	5.3856	16.7573	4.18298
5.87342		5.71931		7.22818		7.93861	4.06906	5.08095	5.09967	6.03669		6.99243		6.19479	5.8113	7.29349	4.4414	6.94863			4.74328	12.4259	5.80608	12.7849	6.93644	12.2696	6.76502	10.983	5.12645	10.0764	10.5463	13.5885	6.82653	15.9329	5.56105	18.0969	10.9345	14.1088	6.09951	10.1198		4.68365	6.31252	19.763	4.77837	16.0638	5.38222	16.7657	4.17959
5.87859		5.7213		7.5157		7.93901	4.06787	5.06144	5.09768	6.02833		7.00079		6.20832	5.8105	7.28353	4.45375	6.91876			4.74025	12.5197	5.8081	12.7899	6.93241	12.2787	6.74284	10.991	5.18393	10.503	10.5231	13.5311	6.8346	15.9208	5.57214	18.111	10.9124	14.1098	6.10254	10.1299		4.68872	6.36327	19.7613	4.77837	16.0773	5.39068	16.7725	4.17959
5.86426		5.73523		7.65508		7.94021	4.08778	5.04033	5.09688	6.00404		7.02508		6.21071	5.81249	7.26163	4.46689	6.88093			4.67068	12.5429	5.90288	12.7899	6.93241	12.2787	6.69444	10.99	5.192	10.7299	10.4788	13.4988	6.84266	15.8664	5.61449	18.1261	10.8156	14.1078	6.13783	10.1581		4.66673	6.37003	19.7545	4.77837	16.0316	5.41605	16.7776	4.19313
5.88218		5.73683		7.74308		7.9422	4.10888	5.0244	5.09688	5.98691		7.0665		6.19518	5.80891	7.21026	4.48122	6.86301			4.65656	12.5358	6.02388	12.7879	6.94148	12.2767	6.64704	10.9789	5.17687	10.7157	10.4778	13.4716	6.84771	15.7978	5.65281	18.1342	10.7369	14.1098	6.16001	10.1561		4.58385	6.39033	19.7359	4.78852	16.0536	5.42112	16.7894	4.2185
5.91444		5.71612		7.77932		7.93901	4.1268	5.00688	5.0925	5.93634		7.08999		6.1904	5.81169	7.12384	4.5318	6.89447			4.6969	12.5116	6.10254	12.7839	6.9556	12.2898	6.68133	10.9769	5.19603	10.6502	10.5181	13.4453	6.84972	15.7595	5.66592	18.1332	10.6754	14.1088	6.1711	10.1561		4.51619	6.39202	19.7309	4.78683	16.1551	5.41605	16.8114	4.27262
5.93474		5.70457		7.77494		7.93144	4.13556	4.98737	5.07776	5.86983		7.08999		6.19718	5.81727	7.09517	4.6218	7.01154			4.73219	12.4652	6.17514	12.7788	6.98887	12.3241	6.7993	10.9598	5.20712	10.6331	10.5544	13.4837	6.85275	15.7232	5.65382	18.118	10.5927	14.1411	6.17614	10.1743		4.50774	6.38526	19.8036	4.78852	16.512	5.41943	16.8249	4.35889
5.96859		5.70019		7.76459		7.90675	4.13238	4.97582	5.07617	5.84992		7.0892		6.21948	5.81249	7.13022	4.66361	7.14137			4.7221	12.4461	6.20841	12.7778	7.02921	12.3372	6.94955	10.9618	5.20813	10.6784	10.5776	13.5442	6.88098	15.5145	5.68205	18.0918	10.4848	14.1925	6.17614	10.1944		4.51112	6.3768	19.9288	4.80036	17.2292	5.41774	16.8283	4.41978
6.01558		5.70139		7.7853		7.86375	4.14393	4.97542	5.08175	5.84435		7.0892		6.26487	5.81169	7.15252	4.66242	7.20429			4.72614	12.4461	6.21245	12.7869	7.05139	12.3351	7.03627	11.0031	5.31199	10.8468	10.5907	13.5744	6.91627	15.09	5.69113	18.111	10.4526	14.2006	6.22051	10.2075		4.51112	6.31252	20.0658	4.81727	18.0462	5.41605	16.8486	4.43331
6.04983		5.75753		7.83348		7.84941	4.16185	4.97861		5.84236		7.06809		6.32142	5.8097	7.16207	4.66321	7.20667			4.76445	12.4461	6.21648	12.8272	7.06047	12.3281	7.05946	11.0273	5.46425	11.1292	10.6008	13.5966	6.89308	14.5908	5.69012	18.1261	10.4919	14.2036	6.26085	10.2075		4.5145	6.29223	20.1757	4.83926	18.7211	5.41605	16.8824	4.42655
6.05939		5.82603		7.86494		7.8514		4.97781		5.83837		7.03902		6.36921		7.18557	4.65246	7.1792			4.80479	12.444	6.22051	12.9008	7.0524	12.32	7.06349	11.0324	5.48139	11.2542	10.628	13.5966	6.8709	14.2369	5.70323	18.1553	10.506	14.2218	6.28505	10.2741		4.4756	6.29561	20.2535	4.84434	19.0018	5.39575	16.9129	4.3961
6.0562		5.8997		7.8749		7.7622		4.98856		5.832		7.0442		6.39708		7.2453	4.63812	7.14176			4.84916	12.4047	6.17211	12.9916	7.07862	12.3059	7.05845	11.0354	5.49349	11.2562	10.6774	13.5704	6.88401	14.134	5.7355	18.2249	10.505	14.2591	6.32437	10.3527		4.34705	6.29223	20.3364	4.83757	19.0154	5.36531	16.9433	4.3758
6.08209		5.98213		7.91352		7.5153		4.99414		5.83638		7.04181		6.41301		7.30583	4.63335	7.09159			4.9147	12.3362	6.09951	13.0339	7.09072	12.2928	7.05139	11.0243	5.50257	11.3591	10.7319	13.5361	6.91728	14.132	5.77482	18.24	10.4929	14.3206	6.39496	10.383		4.22188	6.31422	20.3939	4.84603	18.9815	5.33824	16.9806	4.37919
6.18602		6.03749		8.04374		7.24331		5.0033		5.85112		7.02827		6.40823		7.34167	4.63374	7.03026			4.9389	12.2746	6.05716	13.0259	7.10584	12.2827	7.06551	10.994	5.49753	11.5496	10.8004	13.524	6.97173	14.13	5.7839	18.2743	10.4727	14.3861	6.47865	10.3981		4.18974	6.39879	20.3973	4.84265	18.946	5.32302	17.0161	4.3758
6.26965		6.04027		8.23569		7.11747		5.00569		5.87103		7.00358		6.38952		7.38707	4.66919	6.99084			4.95201	12.1637	6.04203	13.038	7.13912	12.2696	7.06349	10.9618	5.49753	11.6636	10.8408	13.5472	6.98988	14.134	5.78793	18.3994	10.4626	14.4103	6.57041	10.3689		4.18129	6.47321	20.4159	4.83588	18.8868	5.30611	17.033	4.37073
6.2816		6.01837		8.37825		7.08123		5.00569		5.89293		7.01274		6.3939		7.45198	4.78149	6.96655			4.98327	11.9278	6.03901	13.046	7.13811	12.2404	7.07257	10.9255	5.48946	11.6717	10.7863	13.5532	6.96266	13.8527	5.83633	18.5637	10.4616	14.4164	6.66822	10.3547		4.17452	6.43431	20.4988	4.83588	18.8242	5.28581	17.0262	4.37073
6.2816		5.99926		8.43002		7.0884		5.01285		5.91205		7.0438		6.42496		7.48185	4.92923	6.93668			5.01553	11.8007	6.02489	13.0481	7.13811	12.2303	7.07862	10.8982	5.48038	11.7735	10.6774	13.521	7.01308	13.3072	5.89481	18.7251	10.4586	14.4174	6.74183	10.382		4.16945	6.37172	20.5935	4.84772	18.9951	5.28412	17.0178	4.37073
6.28439		5.97935		8.43321		7.10672		5.05706		5.92917		7.06491		6.4158		7.46751	5.03077	6.92473			5.01957	11.7967	5.97447	13.0501	7.13811	12.2494	7.08568	10.9083	5.50458	12.44	10.6058	13.521	7.07559	12.9432	5.917	18.8017	10.4405	14.4234	6.79225	10.4152		4.15084	6.38018	20.6037	4.85449	19.5617	5.28243	17.0009	4.36904
6.30231		5.95386		8.43719		7.10791		5.1156		5.93554		7.08999		6.37558		7.43406	5.07896	6.92752			5.00646	11.8007	5.92607	13.043	7.14013	12.2726	7.09374	10.9073	5.55298	13.1922	10.626	13.5411	7.1492	12.8625	5.95935	18.8148	10.4203	14.4214	6.88804	10.4243		4.15422	6.42078	20.5698	4.85956	19.8442	5.28412	16.9738	4.36904
6.33058		5.92718		8.48657		7.09915		5.12914		5.93355		7.10433		6.34293		7.3584	5.09688	6.92832			4.96612	11.8481	5.91397	13.0491	7.15324	12.2787	7.09274	10.9124	5.59029	13.5946	10.6976	13.5432	7.2208	12.8827	5.98355	18.8067	10.388	14.4981	7.00098	10.4263		4.25064	6.45968	20.5546	4.86463	19.8357	5.28073	16.9417	4.36904
6.34571		5.92439		8.55029		7.1115		5.1152		5.94072		7.10154		6.34571		7.19114	5.10285	6.92991			4.89857	11.9066	5.92708	13.043	7.15424	12.2414	7.10282	10.7551	5.64374	13.9858	10.7309	13.5502	7.28029	12.8585	5.96338	18.7825	10.2842	14.606	7.09475	10.4465		4.37073	6.46983	20.5563	4.8325	19.6108	5.23676	16.9112	4.35889
6.34691		5.94868		8.57736		7.16526		5.09449		6.02435		7.09756		6.40465		6.90761	5.11679	6.93588			4.7695	11.9489	5.92507	13.0299	7.15324	12.2061	7.14719	10.502	5.72743		10.7359	13.5482	7.31659	12.7647	5.93918	18.7382	10.1581	14.7219	7.2208	10.5322		4.46714	6.45291	20.5851	4.7919	19.1287	5.15049	16.8943	4.34367
6.3477		5.95107		8.57458		7.2469		5.10405		6.28837		7.09358		6.51456		6.5512	5.14666	6.93548			4.68177	12.0054	5.89986	13.037	7.15626	12.2363	7.17038	10.2983	5.76776		10.742	13.5432	7.34583	12.5449	5.93717	18.7563	10.1037	14.8631	7.39827	10.6663		4.58724	6.46814	20.6003	4.79529	19.083	5.03716	16.8892	4.34197
6.35328		5.92559		8.55546		7.33172		5.15701		6.54682		7.09119		6.62805		6.19996	5.16936	6.93947			4.68479	12.0579	5.87465	13.037	7.14819	12.2535	7.17139	10.1138	5.76978		10.746	13.5361	7.38213	12.2666	5.93515	18.9459	10.0664	14.9155	7.47692	10.8347		4.68703	6.48167	20.5461	4.83081	19.7495	4.90185	16.8875	4.34874
6.372		5.90886		8.52998		7.42092		5.21874		6.62168		7.09119		6.7065		5.96262	5.1813	6.94066			4.71404	12.08	5.86658	13.036	7.14214	12.2515	7.19256	9.97057	5.76978		10.744	13.53	7.44263	12.0891	5.93112	19.195	10.0139	14.9135	7.47792	10.9063		4.72932	6.48167	20.5478	4.8714	20.2907	4.8511	16.8875	4.3369
6.39908		5.90806		8.5017		7.47946		5.25975		6.63642		7.09199		6.72721		5.83479	5.18568	6.92473			4.74933	12.0548	5.87566	13.0299	7.12904	12.2525	7.26214	9.94334	5.76877		10.7389	13.5421	7.54347	12.0337	5.95027	19.2867	9.97662	14.976	7.46381	10.8367		4.75638	6.47829	20.5952	4.89001	20.5411	4.84603	16.8875	4.27432
6.43452		5.88298		8.4806		7.4488		5.26334		6.64876		7.088		6.70133		5.77187	5.18847	6.8861			4.7584	12.0115	5.87364	13.0128	7.1008	12.2676	7.31155	9.97662	5.74356		10.7309	13.5472	7.63422	12.0357	5.99363	19.2333	9.95443	15.0214	7.45675	10.8105		4.78006	6.46983	20.6409	4.89846	20.5952	4.84603	16.8875	4.22695
6.47354		5.87859		8.46745		7.39145		5.21595		6.65712		7.0888		6.64757		5.73922	5.20082	6.82836			4.75336	11.9873	5.85952	12.9956	7.06652	12.2988	7.34684	9.98973	5.72945		10.7087	13.5442	7.70178	11.9832	6.04808	19.1455	9.92116	15.0043	7.45977	10.8428		4.78852	6.45291	20.6747	4.90692	20.4041	4.83757	16.8892	4.2185
6.49943		5.91682		8.45949		7.36596		5.14865		6.65712		7.09119		6.59779		5.73842	5.21396	6.78734			4.75941	11.9641	5.84339	12.9845	7.02316	12.319	7.39827	9.99477	5.76776		10.7117	13.5462	7.70682	11.952	6.16001	19.1415	9.87578	14.972	7.49507	10.9567		4.79021	6.44277	20.6933	4.87986	20.3466	4.82742	16.8858	4.21173
6.50421		5.89373		8.46148		7.34924		5.12316		6.66947		7.10553		6.55996		5.75076	5.21794	6.78336			4.7584	11.8421	5.81919	12.9906	6.97577	12.3382	7.44062	9.99981	5.796		10.7147	13.5421	7.69069	11.951	6.26891	19.1466	9.82133	14.9266	7.52935	11.1524		4.78683	6.43769	20.7068	4.73778	20.3956	4.82573	16.8723	4.1779
6.5062		5.83519		8.46148		7.33212		5.12874		6.73836		7.11827		6.53407		5.77386	5.22352	6.77858			4.75941	11.7644	5.78793	13.0158	6.96266	12.3513	7.48801	9.99477	5.78591		10.6774	13.5401	7.73304	11.9227	6.30017	19.1486	9.75075	14.859	7.53238	11.2855		4.77499	6.43431	20.7153	4.55002	20.5208	4.82404	16.8588	4.12039
6.52173		5.8093		8.45989		7.34327		5.08015		6.8188		7.14176		6.5273		5.82683	5.2263	6.77102			4.75941	11.8481	5.78188	13.0652	6.96669	12.3462	7.53943	9.99073	5.81717		10.6542	13.5452	7.81976	11.8844	6.32336	19.1718	9.67008	14.7985	7.53238	11.3389		4.76991	6.43431	20.7187	4.4164	20.9606	4.82404	16.8554	4.08318
6.52969		5.78143		8.45471		7.35203		4.98418		6.8638		7.1569		6.5273		5.88337	5.22989	6.77301			4.7463	11.8965	5.78692	13.0793	6.9798	12.3452	7.5717	9.89897	5.85851		10.6542	13.5553	7.91958	11.8693	6.37277	19.2081	9.59344	14.7491	7.53843	11.3722		4.76822	6.43938	20.7221	4.33521	21.561	4.82404	16.8486	4.07303
6.52691		5.75793		8.43161		7.35123		4.86352		6.89327		7.15331		6.53208		5.90767	5.24621	6.73597			4.73219	11.9157	5.77785	13.0763	7.01308	12.3493	7.59086	9.75175	5.89885		10.6754	13.6107	7.96294	11.8743	6.38386	19.2192	9.51479	14.6836	7.52532	11.468		4.753	6.45461	20.7221	4.34367	21.808	4.81727	16.8385	4.07134
6.5273		5.76988		8.40015		7.34924		4.76277		6.89486		7.14853		6.54443		5.90329	5.2494	6.6846			4.73723	11.9137	5.7597	13.0954	6.98182	12.3331	7.61809	9.72352	5.95128		10.6815	13.6369	7.99319	11.9409	6.39193	19.1687	9.44219	14.6362	7.50011	11.709		4.73947	6.46814	20.7221	4.37749	21.835	4.82404	16.8334	4.07472
6.52213		5.78103		8.36591		7.34804		4.76834		6.86978		7.13898		6.55359		5.89651	5.2486	6.6619			4.73824	11.9157	5.74961	13.1237	6.91627	12.2928	7.63422	9.72251	6.00674		10.6925	13.525	8.0789	11.9489	6.42017	19.1163	9.37362	14.6211	7.50717	11.9056		4.74285	6.49351	20.6967	4.35043	21.83	4.81558	16.8216	4.08656
6.51894		5.78939		8.3221		7.35561		4.83604		6.84987		7.12504		6.55478		5.89094	5.24821	6.65832			4.72614	11.9046	5.73247	13.1519	6.9435	12.2666	7.62716	9.72453	6.06825		10.7309	13.2568	8.20293	11.6354	6.4605	19.1355	9.3222	14.6211	7.51826	11.9752		4.753	6.50197	20.6612	4.35043	21.7961	4.80036	16.8046	4.09333
6.52133		5.78939		8.24126		7.36756		4.84719		6.83195		7.11787		6.55478		5.88218	5.26254	6.65155			4.72916	11.9177	5.72541	13.161	7.05139	12.2535	7.62514	9.72755	6.14186		10.748	12.8998	8.30376	11.3903	6.50588	19.206	9.31312	14.6191	7.51624	12.0064		4.76484	6.49182	20.6409	4.30984	21.7149	4.75976	16.7979	4.09164
6.55438		5.76152		8.14887		7.36995		4.81255		6.85066		7.18159		6.55598		5.86983	5.29201	6.63841			4.72614	11.9358	5.72541	13.161	7.14819	12.2686	7.63019	9.69024	6.19127		10.749	12.5308	8.31183	11.3167	6.56033	19.2625	9.31917	14.5979	7.51523	12.0296		4.78006	6.49351	20.6223	4.28446	21.6354	4.6938	16.6456	4.07303
6.57469		5.74479		8.09472		7.3795		4.79861		6.93947		7.31499		6.55916		5.83837	5.30953	6.63443			4.74227	11.9631	5.72945	13.165	7.16534	12.3099	7.67153	9.69024	6.20135		10.751	12.2898	8.15957	11.2986	6.60268	19.2897	9.31917	14.5727	7.51624	12.0316		4.79359	6.48674	20.6138	4.28446	21.6033	4.60415	16.4494	4.06288
6.56075		5.7432		8.07242		7.4038		4.80219		6.99641		7.41495		6.5508		5.81926	5.31232	6.63164			4.75135	11.9873	5.71634	13.1711	7.15929	12.3513	7.69472	9.78301	6.20236		10.7359	12.2353	8.04361	11.2955	6.64503	19.2978	9.30707	14.5455	7.50717	12.0558		4.79529	6.47152	20.673	4.28108	21.5847	4.52973	16.3395	4.07642
6.55239		5.75076		8.05569		7.42371		4.82728		6.98964		7.51171		6.53567		5.8328	5.2936	6.63323			4.7463	11.9752	5.7002	13.1791	7.15122	12.3725	7.69775	9.87982	6.20438		10.6946	12.2757	8.04159	11.2572	6.68738	19.2988	9.2859	14.5334	7.51221	12.1264		4.78852	6.46645	20.739	4.26755	21.5559	4.48744	16.2921	4.07811
6.55239		5.74559		8.04335		7.47349		4.84361		6.9765		7.62401		6.51974		5.83917	5.26055	6.63801			4.7463	11.9379	5.70121	13.1922	7.09173	12.3019	7.69875	9.96754	6.20539		10.7057	12.3442	8.02243	11.1302	6.67729	19.2907	9.2627	14.5293	7.50213	12.1637		4.78006	6.47998	20.7914	4.25233	21.539	4.46038	16.2887	4.07642
6.55558		5.742		8.03498		7.61406		4.8452		6.98447		7.67459		6.51058		5.83519	5.22272	6.63642			4.74832	11.9227	5.69617	13.2013	7.02618	12.072	7.70682	10.1047	6.20135		10.7097	12.3906	7.96899	10.9587	6.65713	19.3139	9.18305	14.5354	7.50313	12.1506		4.7733	6.48505	21.2244	4.23203	21.539	4.45192	16.2904	4.0798
6.58345		5.74559		8.0318		7.7614		4.88343		7.00159		7.70008		6.51018		5.83877	5.18887	6.6396			4.75235	11.9943	5.73953	13.2104	6.9919	11.6091	7.74312	10.2791	6.14791		10.6956	12.4067	7.90748	10.8065	6.66318	19.4944	8.99146	14.5434	7.47389	12.0982		4.76653	6.4749	22.153	4.21173	21.5441	4.45361	16.26	4.07642
6.63164		5.74161		8.03259		7.82114		4.90653		7.02668		7.73831		6.52691		5.85271	5.18489	6.65792			4.75034	12.322	5.82927	13.2215	6.98282	11.0687	7.79354	10.3547	6.12472		10.6855	12.3977	7.91152	10.5423	6.64805	19.6447	8.81399	14.5606	7.47591	12.0478		4.76146	6.47998	22.4254	4.21004	21.561	4.44515	16.145	4.08149
6.6858		5.73882		8.02702		7.82233		4.8902		7.04261		7.7626		6.56952		5.85152	5.18369	6.685			4.75135	12.6417	5.87566	13.2326	6.96367	10.5917	7.84093	10.2458	6.11968		10.6865	12.3977	7.94277	10.1722	6.55226	19.6699	8.7545	14.5918	7.43356	12.0095		4.753	6.51888	22.312	4.20666	21.5712	4.42316	15.8879	4.08149
6.73996		5.73882		8.02622		7.80481		4.86631		7.04938		7.78808		6.59978		5.8551	5.17055	6.69336			4.74832	12.7334	5.8807	13.2477	6.92535	10.2035	7.87723	10.1269	6.10859		10.6623	12.3977	7.97706	9.77394	6.4484	19.6971	8.72929	14.616	7.34381	11.951		4.74454	6.53918	22.1767	4.20158	21.5238	4.40287	15.5174	4.08318
6.76863		5.75873		8.02542		7.75184		4.84002		7.05415		7.84304		6.61491		5.86067	5.16697	6.69257			4.73521	12.7284	5.73146	13.2689	6.87997	10.1188	7.92462	10.0805	6.10153		10.628	12.3896	8.04159	9.43614	6.42622	19.7415	8.64963	14.6332	7.31054	11.8733		4.74454	6.5358	22.0482	4.20327	21.4477	4.38257	15.0015	4.08487
6.77779		5.80771		8.01945		7.70406		4.79383		7.06013		7.9195		6.62766		5.85988	5.16936	6.69018			4.74025	12.7284	5.56004	13.281	6.84468	10.0704	7.9458	10.0744	6.0743		10.6089	12.3311	8.12327	9.25968	6.4242	19.7566	8.50543	14.6503	7.32869	11.8572		4.73439	6.51719	21.9754	4.19651	21.3868	4.33013	14.4417	4.08656
[truncated: 1,095 more rows]
[truncated: 272 more columns]

## Sheet: M.vastus medialis
Subject 1																					Subject 2																					Subject 3
[truncated: 2,150 more rows]
[truncated: 272 more columns]

## Sheet: M.biceps femoris
Subject 1																					Subject 2																					Subject 3
[truncated: 2,150 more rows]
[truncated: 272 more columns]

## Sheet: M.tibialis anterior
Subject 1																					Subject 2																					Subject 3
[truncated: 2,150 more rows]
[truncated: 272 more columns]

[truncated: 1 more sheets: M.gastrocnemius]
